# Supplementary material for: Characterization of distinct circular RNA signatures in solid tumors
Source: PubMed Central journal article supplement (PMC8889743; doi:10.1186/s12943-022-01546-4), 2022-03-02
Supplement: 12943_2022_1546_MOESM3_ESM.pdf [file 12943_2022_1546_MOESM3_ESM.pdf]

## **Supplementary tables**

**Table S3.** Information of primers and probes used in this study.

**Table S4.** The distribution of putative spliced length of exonic circRNAs.

**Table S5.** Exon numbers of identified exonic circRNAs.

**Table S6.** The circRNAs expressed higher than its host genes.

**Table S7.** The number of circRNAs produced from one gene.

**Table S12.** Information of tissue-specific RBPs.

**Table S3. Information of primers and probes used in this study**

| Name   | Sequence (5'-3')                                       | Usage                     | Target name |
|--------|--------------------------------------------------------|---------------------------|-------------|
| F1     | GCTCGTAAAATTAGACTGACTGCATTG                            | RT-qPCR                   | circLIFR    |
| R1     | ATGAGGAGCCCCCTTTTTCTGG                                 |                           |             |
| F2     | ATTTGTCTGCTGATTTCTCAACCTC                              |                           |             |
| R2     | TAAATGTTGATAACAGCCACTGGA                               | divergent primer for PCR  | LIFR        |
| F3     | GCATTGCACAGATGATGGATATT                                | convergent primer for PCR |             |
| R3     | TGTTCCAGAGGGTGCTTTC                                    |                           |             |
| F4     | TTCTGTTTCTGCAAGTAGTGGA                                 | divergent primer for PCR  | LIFR        |
| R4     | GTATCTTTGCCATTCAGAGTTGTG                               | convergent primer for PCR |             |
| F5     | CACAACTCTGAATGGCAAAGATAC                               |                           |             |
| R5     | TCCACTACTTGCAGAAACAGAA                                 |                           |             |
| F6     | ACATCATCCCTGCCTCTACT                                   | PCR                       | GAPDH       |
| R6     | CTCTCTTCCTCTTGCTCTTG                                   |                           |             |
| F7     | CGCTTCGGCAGCACATATAC                                   | RT-qPCR                   | U6          |
| R7     | AGGGGCCATGCTAATCTTCT                                   |                           |             |
| F8     | AGGCCAACCGCGAGAAGATG                                   | RT-qPCR                   | Actin       |
| R8     | GCCAGAGGCGTACAGGGATA                                   |                           |             |
| F9     | TTCAGCGATACCACAACCTCC                                  | RT-qPCR                   | Vinculin    |
| R9     | AGTTAGCTGCCCTCTCATCA                                   |                           |             |
| F10    | ATTTTTTTTATTTTATGCAGGACTGACTG<br>CATTGCACAGAT          | Cloning                   | circLIFR    |
| R10    | TTGGAATTTTGAATACTTACTAATTTTACG<br>AGCTCCATACTCTCTTTACG |                           |             |
| probe1 | GCAATGCAGTCAGTCTAATTTTACGAGCT                          | FISH probe                | circLIFR    |
| probe2 | GCTAATCTTCTCTGTATCGTTCCAATTTT<br>AGTATATGTGCTGCCG      | FISH probe                | U6          |
| probe3 | CATGGCTTAATCTTTGAGAC                                   | FISH probe                | 18S         |
| F11    | TGCTGGGACTTCCTATGTG                                    | RT-qPCR                   | FN1         |
| R11    | CCTCGATTATCCTTCTTGC                                    |                           |             |
| F12    | CCACCAAAGTCACGCTGAAT                                   | RT-qPCR                   | CDH1        |
| R12    | CCAGGAGAGGAGTTGGGAAA                                   |                           |             |
| F13    | CCGTTGGCATGAAGTGTATGA                                  | RT-qPCR                   | CLDN1       |
| R13    | GCCAGACCTGCAAGAAGAAATA                                 |                           |             |
| F14    | TGTTTCCAAGCCTGACCTCA                                   | RT-qPCR                   | Vimentin    |
| R14    | CGTACTCAGTGGACTCCTG                                    |                           |             |
| F15    | TAGTGGGTGGGATTGAGGTATG                                 | RT-qPCR                   | AGR         |
| R15    | CTCCATGGCAACTCTGGATTC                                  |                           |             |
| F16    | ATTCAGAGGCATCGTTGGAC                                   | RT-qPCR                   | COL17A<br>1 |
| R16    | TAAGACGAGAGGTCCTCCAC                                   |                           |             |

|     |                         |         |              |
|-----|-------------------------|---------|--------------|
| F17 | CAAGCACAGCCAGTCCA       | RT-qPCR | AXL          |
| R17 | TCCTAGCAGTACATACCACCA   |         |              |
| F18 | CCTCAACGGCGAGATCAG      | RT-qPCR | ID1          |
| R18 | ACCCACAGAGCACGTAATTC    |         |              |
| F19 | CAGCCAACGAGCGGAAA       | RT-qPCR | LGALS3       |
| R19 | CATCCTTGAGGGTTTGGGTT    |         |              |
| F20 | CCTGAATCTCAAACCTGGAGAG  | RT-qPCR | LGALS1       |
| R20 | CACAGGTTGTTGCTGTCTTTG   |         |              |
| F21 | GAAGAGATGGAGCGTGCC      | RT-qPCR | LTBP3        |
| R21 | GCACATGCCGTCCTCTC       |         |              |
| F22 | TATGACCCAGGTGTACGAGAG   | RT-qPCR | IRAK1        |
| R22 | AGTGCTGGACACGTAGGA      |         |              |
| F23 | GCGAGTCTGAATGGAAGGATAC  | RT-qPCR | C1QBP        |
| R23 | TCGGCAAGGAAATCCATTAGG   |         |              |
| F24 | GACACTCCATCACAGTCACTAC  | RT-qPCR | VTCN1        |
| R24 | ACCTTCCTTCAGCCATTGTATC  |         |              |
| F25 | CGCAGGGTGTGCAGATT       | RT-qPCR | HSPD1        |
| R25 | GCGAGTGAGGGACAGAGT      |         |              |
| F26 | CACATCAGCACCAAGACCATAG  | RT-qPCR | SERPIN<br>E2 |
| R26 | TTCAGCGGCTCCTTCAAATC    |         |              |
| F27 | TGCTTATTGGACCTCAGTGTG   | RT-qPCR | ITGB6        |
| R27 | CTACTTGGGAGACAGGGTTTTTC |         |              |

Sequences that spanning junction site within the qPCR primers are marked in grey.

**Table S4. The distribution of putative spliced length of exonic circRNAs**

| <b>Putative spliced length of circRNA</b> | <b>CircRNA number</b> | <b>Percentage (%)</b> |
|-------------------------------------------|-----------------------|-----------------------|
| 0~200                                     | 2,152                 | 3.65                  |
| 200~400                                   | 16,914                | 28.66                 |
| 400~600                                   | 12,942                | 21.93                 |
| 600~800                                   | 8,484                 | 14.37                 |
| 800~1000                                  | 5,516                 | 9.34                  |
| 1000~1200                                 | 3,646                 | 6.18                  |
| 1200~1400                                 | 2,444                 | 4.14                  |
| 1400~1600                                 | 1,736                 | 2.94                  |
| 1600~1800                                 | 1,253                 | 2.12                  |
| 1800~2000                                 | 960                   | 1.63                  |
| >2000                                     | 2,973                 | 5.04                  |

**Table S5. Exon numbers of identified exonic circRNAs**

| <b>Exon number of exonic circRNA</b> | <b>CircRNA number</b> | <b>Percentage (%)</b> |
|--------------------------------------|-----------------------|-----------------------|
| 1                                    | 1,952                 | 3.31                  |
| 2                                    | 11,406                | 19.33                 |
| 3                                    | 10,756                | 18.22                 |
| 4                                    | 8,580                 | 14.54                 |
| 5                                    | 6,490                 | 11.00                 |
| 6                                    | 4,867                 | 8.25                  |
| 7                                    | 3,564                 | 6.04                  |
| 8                                    | 2,671                 | 4.52                  |
| 9                                    | 2,018                 | 3.42                  |
| 10                                   | 1,443                 | 2.44                  |
| >10                                  | 5,273                 | 8.93                  |

**Table S6. The circRNAs expressed higher than its host genes**

| <b>circRNA</b>   | <b>Host gene</b> | <b>Average junction ratio of circRNA</b> | <b>Average FPKM expression of gene</b> |
|------------------|------------------|------------------------------------------|----------------------------------------|
| hsa_circ_0000471 | N4BP2L2          | 0.7824974                                | 46.558716                              |
| hsa_circ_0099634 | RMST             | 0.9566105                                | 83.866626                              |
| hsa_circ_0000284 | HIPK3            | 0.6274854                                | 33.628894                              |
| hsa_circ_0006374 | ARCN1            | 0.9990338                                | 16.093043                              |
| hsa_circ_0007383 | ARCN1            | 0.9987578                                | 16.093043                              |
| hsa_circ_0005589 | ARCN1            | 0.9937304                                | 16.093043                              |
| hsa_circ_0000835 | MIB1             | 0.8985182                                | 14.372139                              |
| hsa_circ_0007817 | HUWE1            | 0.9958366                                | 21.997406                              |
| hsa_circ_0006192 | ZHX3             | 0.7328196                                | 14.649046                              |
| hsa_circ_0003910 | SUMF1            | 0.9457619                                | 14.209606                              |
| hsa_circ_0005232 | SLC8A1           | 0.7920198                                | 15.600111                              |
| hsa_circ_0000994 | SLC8A1           | 0.5780236                                | 15.600111                              |
| hsa_circ_0008260 | RGPD5            | 0.6850834                                | 11.916058                              |
| hsa_circ_0006139 | RGPD6            | 0.9840918                                | 11.119681                              |
| hsa_circ_0007951 | ABI2             | 0.7374374                                | 16.954799                              |
| hsa_circ_0002316 | OMA1             | 0.8840141                                | 14.269048                              |
| hsa_circ_0008433 | PDE4B            | 0.8253544                                | 16.107127                              |
| hsa_circ_0006091 | RGS12            | 0.5231434                                | 10.879712                              |
| hsa_circ_0126176 | PCDH7            | 0.9815851                                | 12.986978                              |
| hsa_circ_0001451 | FBXW7            | 0.7319191                                | 16.447917                              |
| hsa_circ_0002210 | ZNF706           | 0.5163743                                | 25.501214                              |
| hsa_circ_0136839 | ERICH1           | 0.9365828                                | 10.706035                              |

**Table S7. The number of circRNAs produced from one gene**

| <b>CircRNA number<br/>produced<br/>from one gene</b> | <b>Gene number</b> | <b>Percentage (%)</b> |
|------------------------------------------------------|--------------------|-----------------------|
| 1                                                    | 2,279              | 26.46                 |
| 2                                                    | 1,274              | 14.79                 |
| 3                                                    | 850                | 9.87                  |
| 4                                                    | 634                | 7.36                  |
| 5                                                    | 527                | 6.12                  |
| 6                                                    | 378                | 4.39                  |
| 7                                                    | 339                | 3.93                  |
| 8                                                    | 275                | 3.19                  |
| 9                                                    | 241                | 2.80                  |
| 10                                                   | 195                | 2.26                  |
| >10                                                  | 1,622              | 18.83                 |

**Table S12. Information of tissue-specific RBPs**

| <b>RBP</b> | <b>Gene ID</b>     | <b>Type</b>  | <b>Tissue</b> | <b>Tissue specificity index (TSI)</b> |
|------------|--------------------|--------------|---------------|---------------------------------------|
| ADARB2     | ENSG00000185736.11 | Deaminase    | Brain         | 0.953734                              |
| CELF3      | ENSG00000159409.10 | RNA splicing | Brain         | 0.991312                              |
| KHDRBS3    | ENSG00000131773.9  | RNA splicing | Brain         | 0.906729                              |
| NOVA1      | ENSG00000139910.15 | RNA splicing | Brain         | 0.903156                              |
| QKI        | ENSG00000112531.12 | RNA splicing | Brain         | 0.863486                              |
| RBFOX1     | ENSG00000078328.15 | RNA splicing | Brain         | 0.997668                              |
| RPP21      | ENSG00000241370.1  | Endonuclease | Esophagus     | 0.926018                              |
| SRSF12     | ENSG00000154548.8  | RNA splicing | Brain         | 0.899597                              |
