# Supplementary material for: Characterization of distinct circular RNA signatures in solid tumors
Source: PubMed Central journal article supplement (PMC8889743; doi:10.1186/s12943-022-01546-4), 2022-03-02
Supplement: 12943_2022_1546_MOESM4_ESM.pdf [file 12943_2022_1546_MOESM4_ESM.pdf]

## Supplementary figures

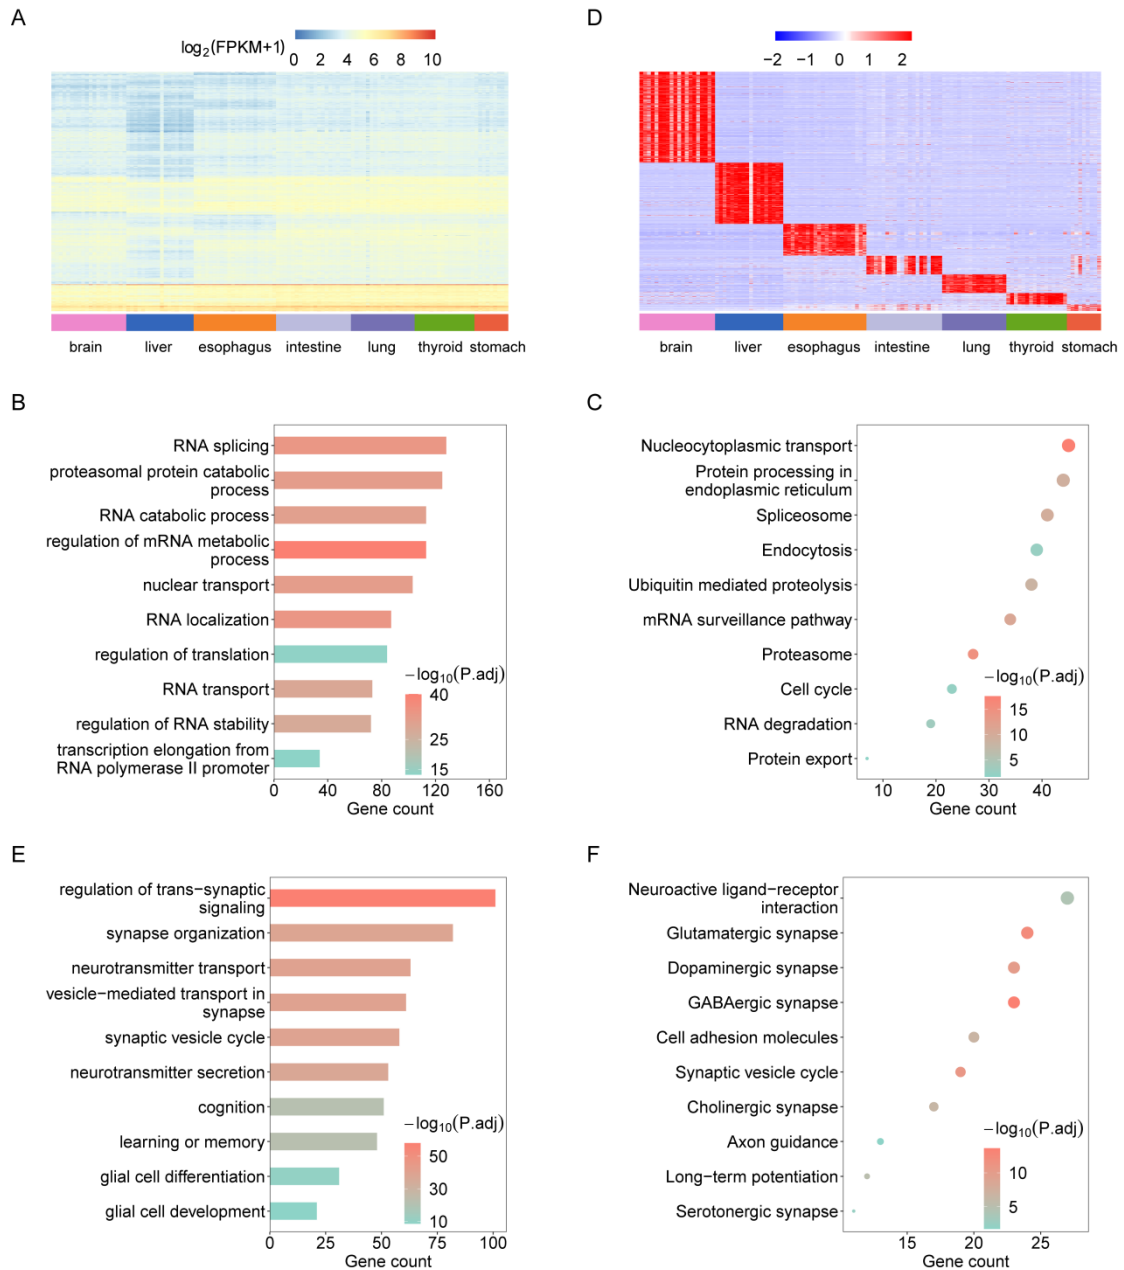

**Fig S1.** Characterization of protein-coding gene profiles in normal tissues. **A** Heatmap of ubiquitously expressed protein-coding genes. **B,C** Enriched biological processes (**B**) and signaling pathways (**C**) of the ubiquitously expressed genes. **D** Heatmap of tissue-specifically expressed protein-coding genes. **E,F** Enriched biological processes (**E**) and signaling pathways (**F**) of brain-specifically expressed genes.

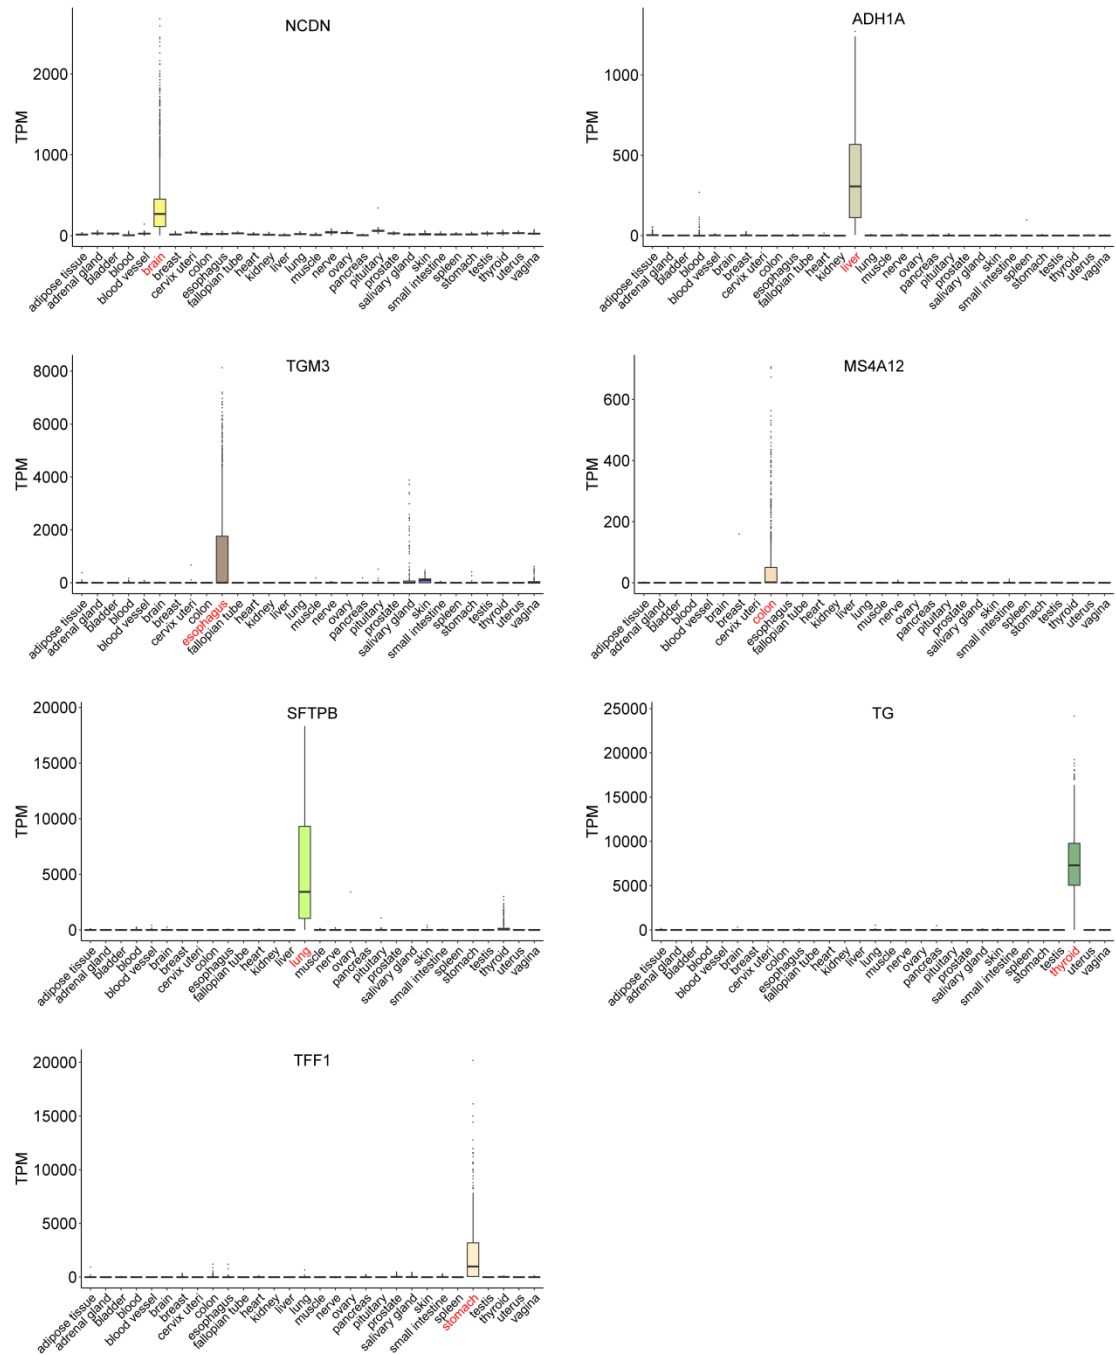

**Fig S2.** Bioinformatics validation of tissue-specifically expressed genes using the GTEx dataset. Gene expression was measured in transcripts per million (TPM).

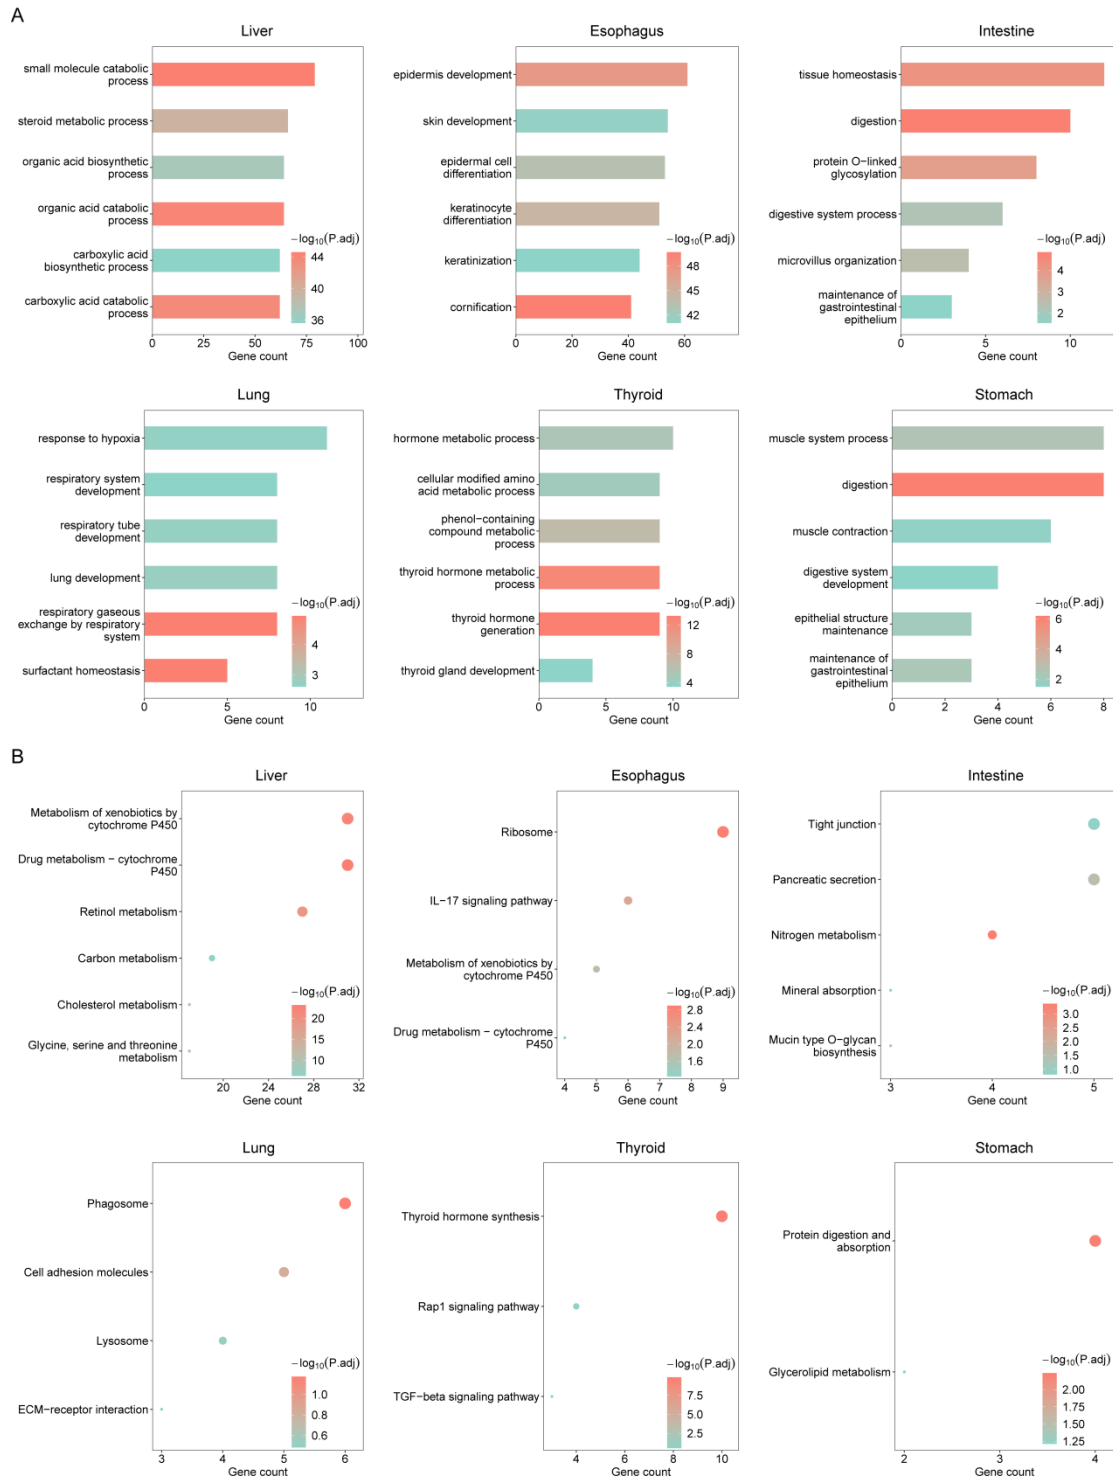

**Fig S3.** The genes with tissue-specific expression patterns were generally enriched in the physiological processes (A) and signaling pathways (B) that were specific to the corresponding tissue.

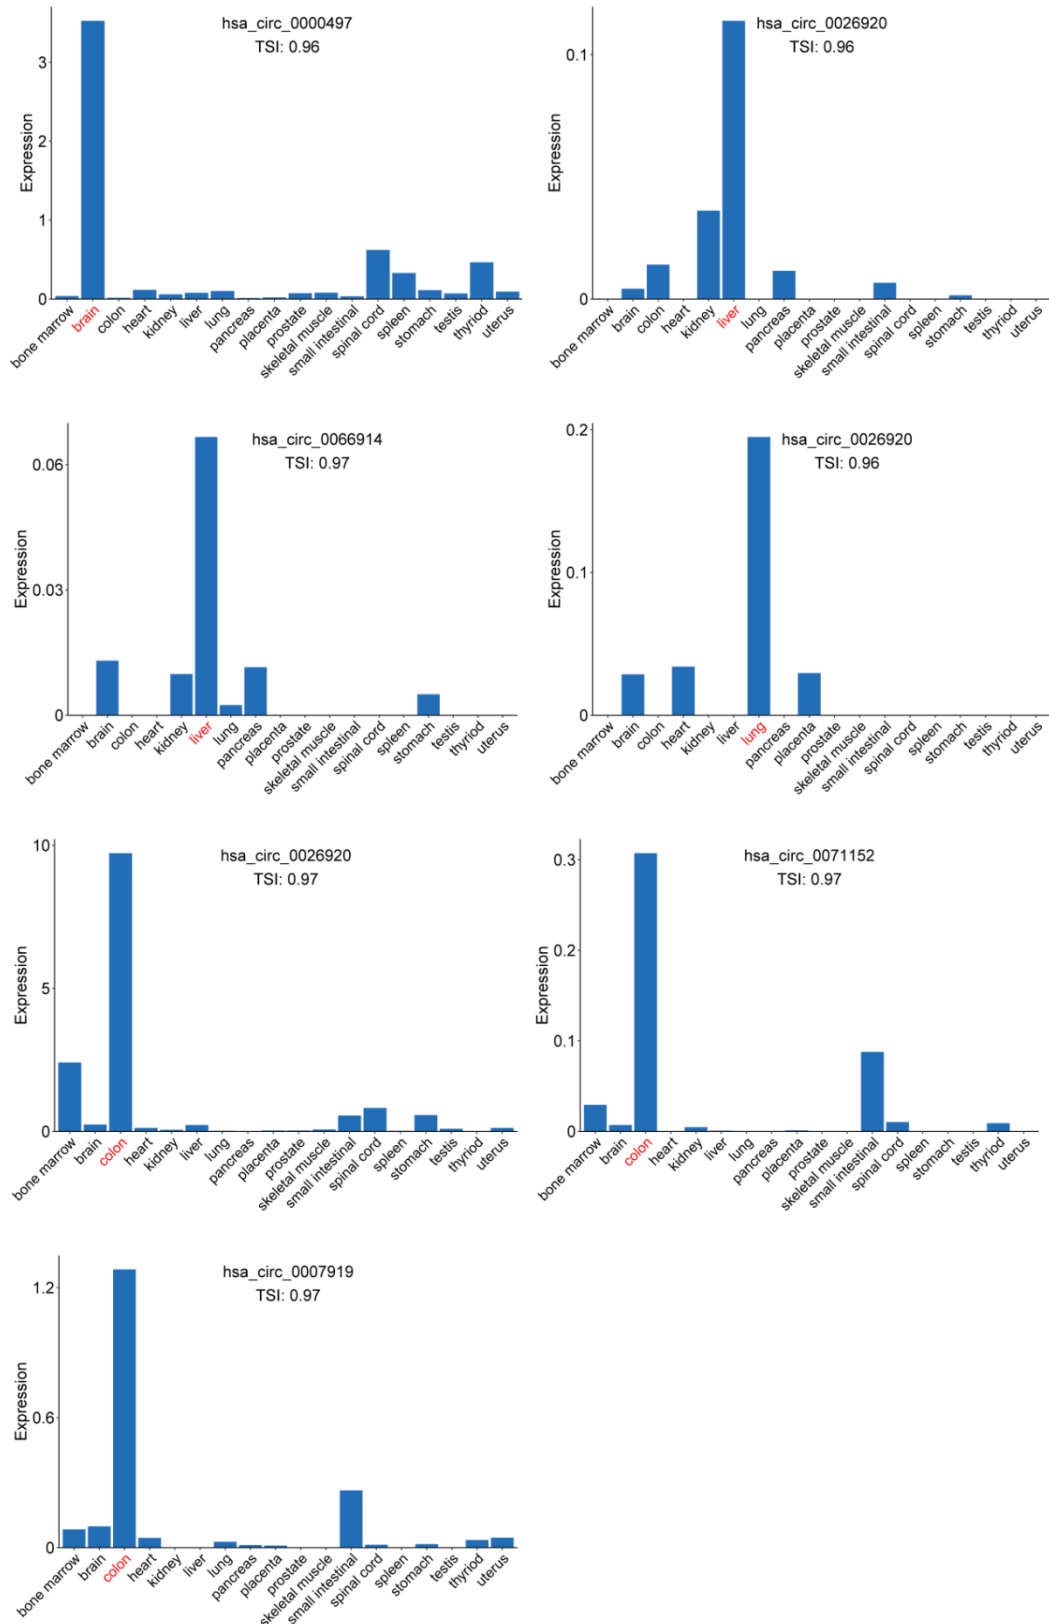

**Fig S4.** The tissue-specific expression patterns of circRNAs were confirmed by the circAtlas database.

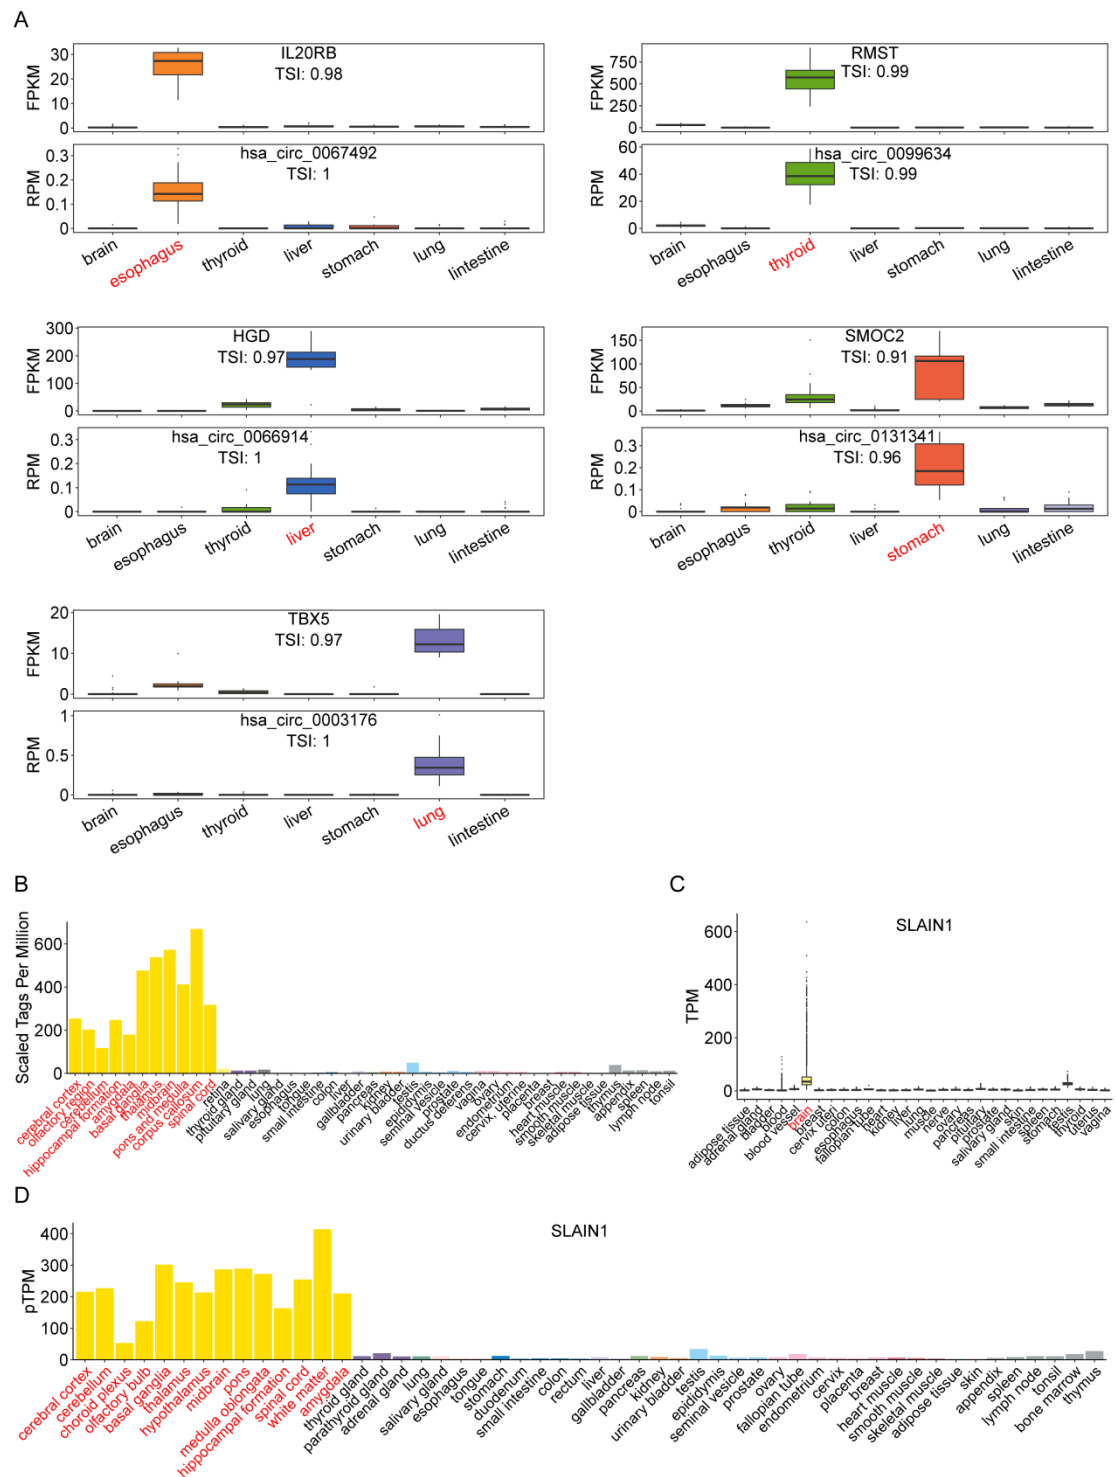

**Fig S5.** The tissue specificity of a subset of circRNAs was governed by their cognate genes. **A** Examples of tissue-specific circRNAs corresponding to their host gene expression. **B-D** Bioinformatics validation of brain-specifically expressed SLAIN1 using FANTOM5 (**B**), GTEx (**C**) and HPA (**D**) datasets.

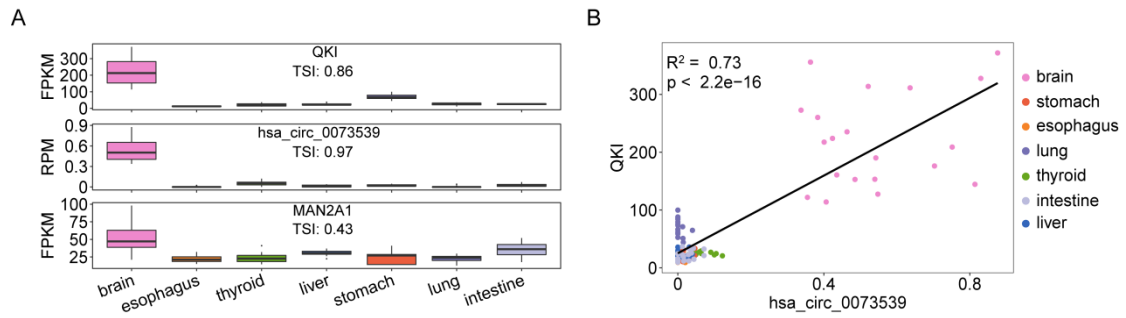

**Fig S6.** Brain-specifically expressed hsa\_circ\_0073539 was regulated by the brain-specific splicing factor QKI. **A** Brain-specific expression of hsa\_circ\_0111312 was independent of its host gene (MAN2A1) expression. **B** The Pearson correlation coefficients between brain-specific hsa\_circ\_0073539 and the splicing factor QKI.

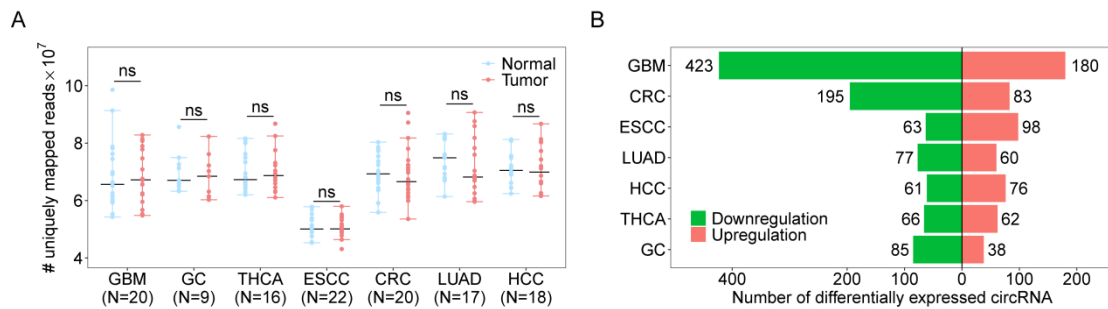

**Fig S7.** The distribution of uniquely mapped reads (**A**) and the number of identified upregulated and downregulated circRNAs (**B**) in each cancer sample. The  $p$ -value was calculated using the Wilcoxon rank-sum test, ns denotes no significance, \* denotes  $p < 0.05$ , \*\* denotes  $p < 0.01$ , \*\*\* denotes  $p < 0.001$ .

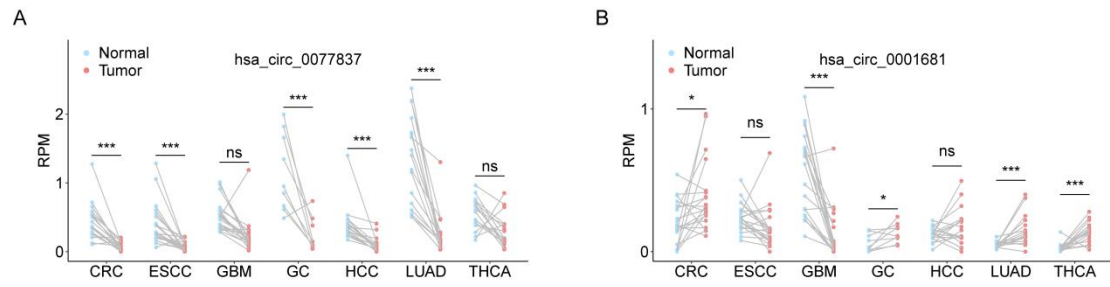

**Fig S8.** Expression patterns of dysregulated circRNAs in cancer. **A,B** The expression profiles of hsa\_circ\_0077837 (**A**) and hsa\_circ\_0001681 (**B**) in different cancers. The  $p$ -value was calculated using the Wilcoxon rank-sum test, ns denotes no significance, \* denotes  $p < 0.05$ , \*\* denotes  $p < 0.01$ , \*\*\* denotes  $p < 0.001$ .

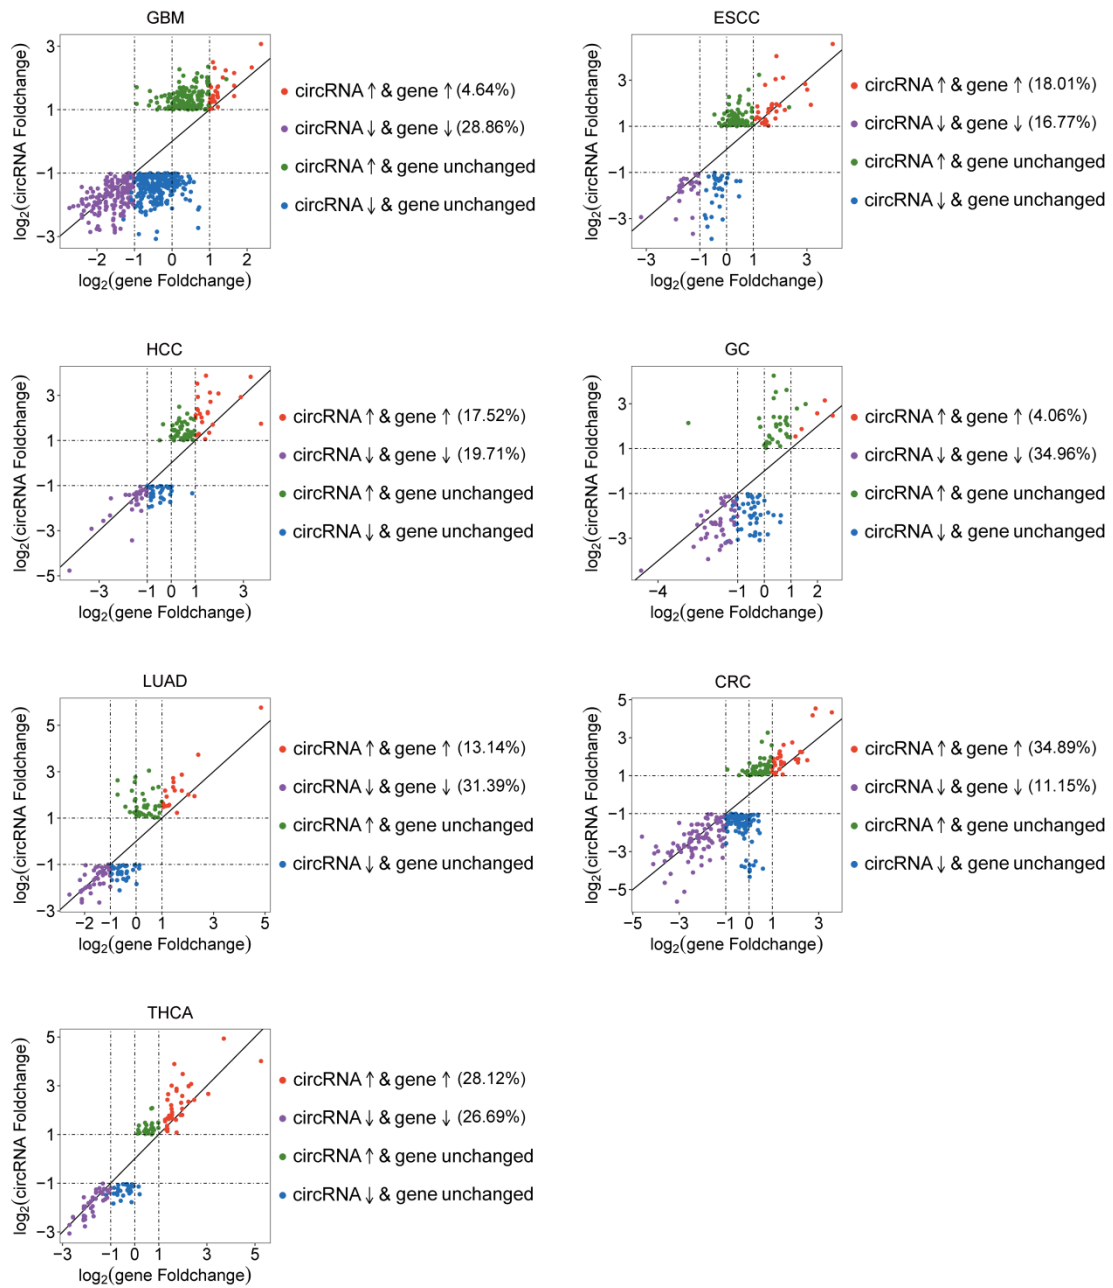

**Fig S9.** Comparison of expression changes between differentially expressed circRNAs and their parental genes among different cancers. Based on circRNA fold-change versus its linear transcript fold-change, circRNAs were divided into four groups.



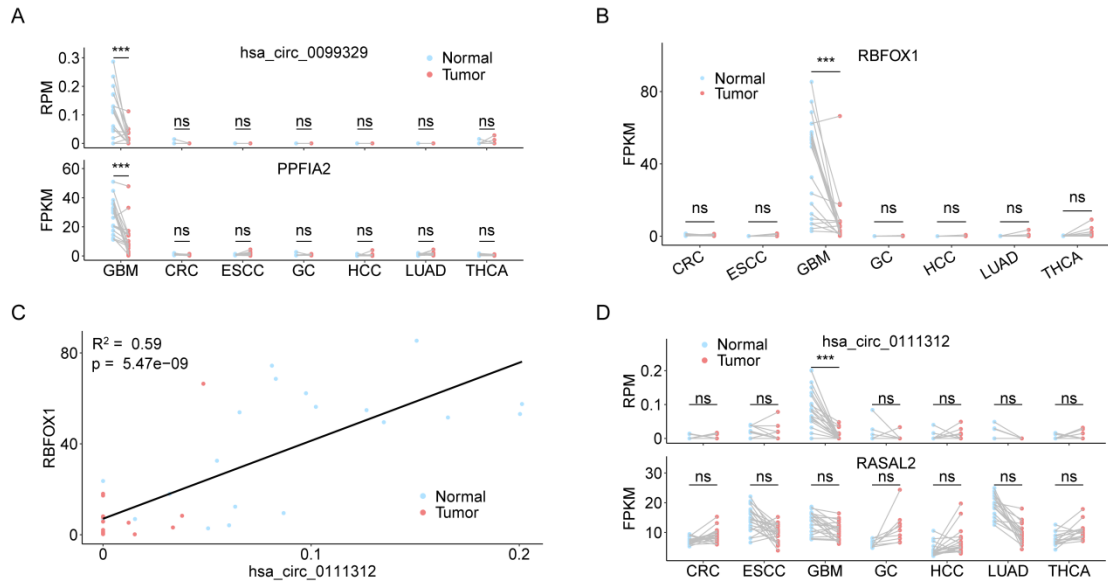

**Fig S10.** Aberrant expression of circRNAs in cancers may be regulated by the host genes or RBPs. **A** Expression of hsa\_circ\_0099329 and its host gene PPFIA2 in tested cancers. **B** The splicing factor RBFOX1 was exclusively downregulated in GBM. **C** The Pearson correlation coefficients between RBFOX1 and hsa\_circ\_0111312 in GBM. The  $p$ -value was calculated using the Wilcoxon rank-sum test, ns denotes no significance, \* denotes  $p < 0.05$ , \*\* denotes  $p < 0.01$ , \*\*\* denotes  $p < 0.001$ . **D** Expression of hsa\_circ\_0111312 and its host gene RASAL2 in tested cancers.

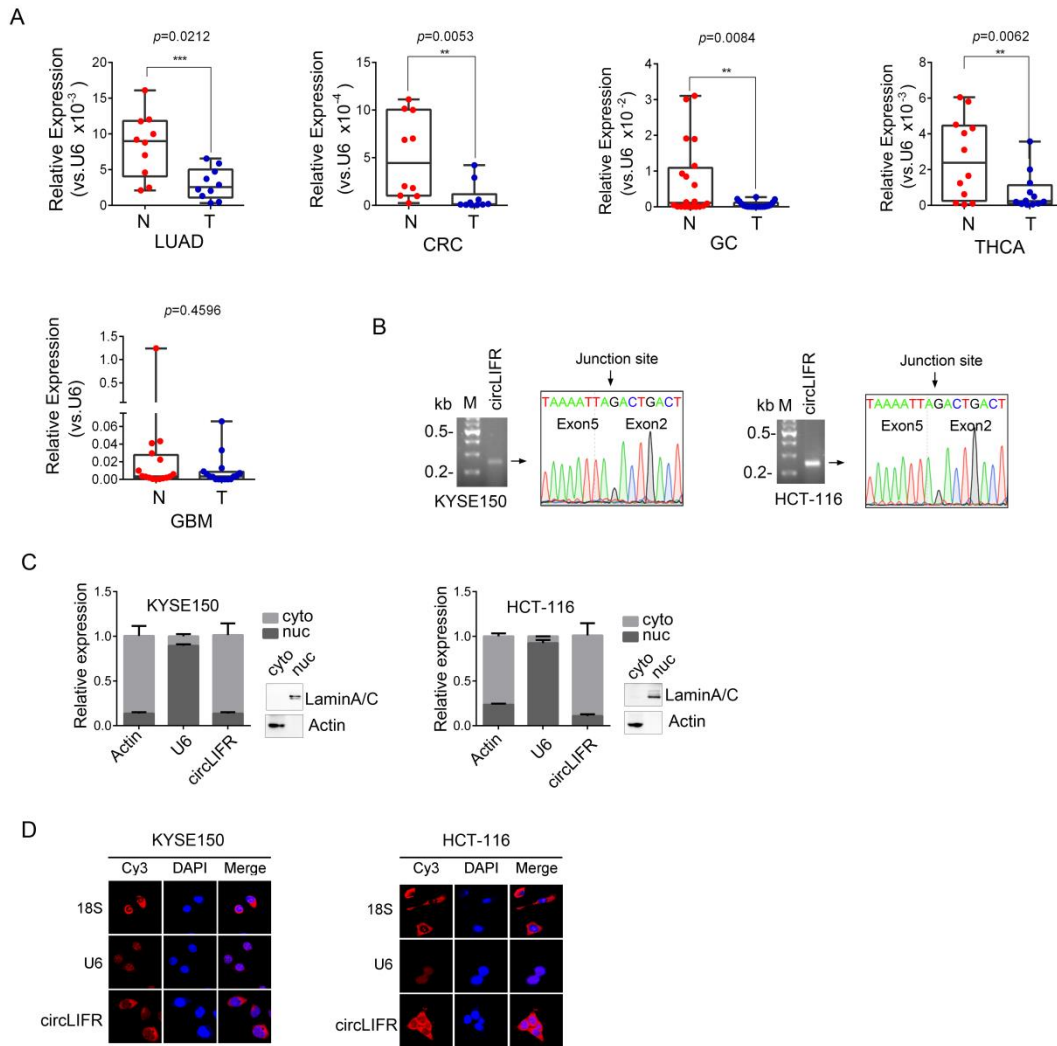

**Fig S11.** circLIFR expression in solid tumors and cells. **A** Quantification of circLIFR by RT-qPCR in solid tumors (LUAD, CRC, GC, THCA, GBM) and their matched adjacent normal tissues, and circLIFR expression was normalized to U6 mRNA levels. N, normal tissues; T, tumor tissues. **B** Identification of the circularization site of circLIFR in KYSE150 and HCT-116 cells by RT-PCR and Sanger sequencing. **C,D** Cellular distribution of circLIFR in KYSE150 and HCT-116 cells, determined by cell nucleus/cytoplasm fractionation and RT-qPCR analyses (**C**) and fluorescence *in situ* hybridization (**D**).  $\beta$ -actin mRNA and U6 RNA represent cytoplasmic and nuclear RNAs, respectively. Western blotting confirmed the efficiency of nuclear/cytoplasmic isolation. Data are shown as the

mean  $\pm$  SD.

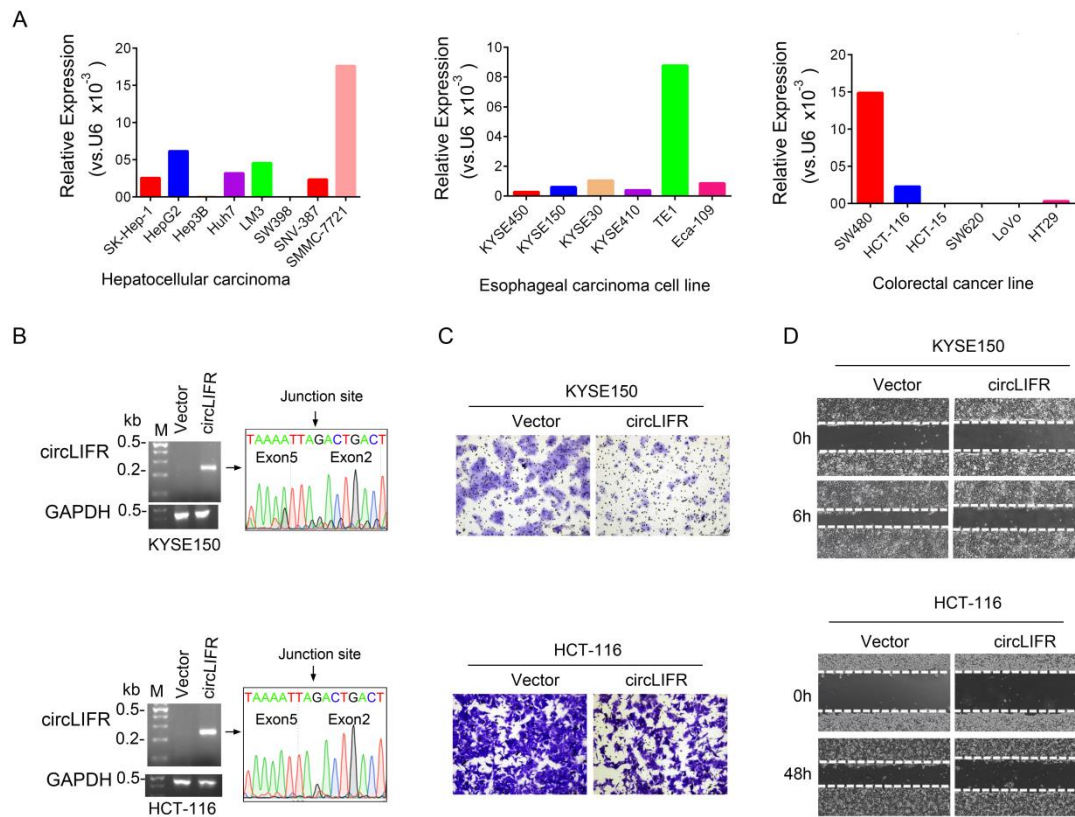

**Fig S12.** Effects of circLIFR on cell migration and motility in KYSE150 and HCT-116 cells.

**A** Measurement of circLIFR expression in different cancer cells. U6 RNAs were used for normalization. **B** RT-PCR and Sanger sequencing showed that circLIFR was correctly overexpressed in different stable cancer cells. **C,D** Overexpression of circLIFR inhibited the migratory ability (**C**) and cell motility (**D**) of KYSE150 and HCT-116 cells.
