# Supplementary material for: Characterization of distinct circular RNA signatures in solid tumors
Source: Mol Cancer. 2022 Mar 2;21:63. doi: 10.1186/s12943-022-01546-4 (PMC8889743; doi:10.1186/s12943-022-01546-4)
Supplement: Supplementary file 1 — Additional file 1: Table S1. Clinical characteristics of the patients enrolled in this study. [file 12943_2022_1546_MOESM1_ESM.xlsx]

## Sheet: Table S1
Table S1: Clinical characteristics of the patients enrolled in this study.
Patient ID	Hispathology	Sex	Age	Smoking Status	Family History of Tumor	T	N	M	Stage
P1	ESCC	Male	52	Former or current	Yes	2	1	0	IIB
P2	ESCC	Male	65	Never	No	2	0	0	IIA
P3	ESCC	Male	46	Never	No	4a	1	0	IIIC
P4	ESCC	Male	75	Former or current	No	3	1	0	IIIA
P5	ESCC	Male	63	Former or current	Yes	3	2	0	IIIB
P6	ESCC	Female	67	Never	No	2	1	0	IIB
P7	ESCC	Male	57	Former or current	No	3	3	0	IIIC
P8	ESCC	Female	67	Never	No	3	1	0	IIIA
P9	ESCC	Female	52	Never	Yes	2	0	0	IIA
P10	ESCC	Female	58	Never	Yes	1a	0	0	IA
P11	ESCC	Male	58	Former or current	No	4a	0	0	IIIB
P12	ESCC	Male	62	Former or current	No	1b	0	0	IB
P13	ESCC	Male	74	Never	No	3	0	0	IIB
P14	ESCC	Male	52	Former or current	No	2	1	0	IIB
P15	ESCC	Male	67	Never	No	3	0	0	IIA
P16	ESCC	Male	51	Never	No	3	2	0	IIIB
P17	ESCC	Male	48	Former or current	No	1	1	0	IIB
P18	ESCC	Male	68	Former or current	No	3	1	0	IIIB
P19	ESCC	Male	71	Former or current	No	2	0	0	IIA
P20	ESCC	Male	77	Former or current	No	3	3	0	IVA
P21	ESCC	Male	75	Former or current	No	4a	0	0	IIIB
P22	ESCC	Male	70	Never	No	3	0	0	IIB
P23	GBM	Male	7	Never	No	-	-	-	IV
P24	GBM	Female	15	Never	No	-	-	-	II
P25	GBM	Female	44	Never	No	-	-	-	II
P26	GBM	Male	55	Former or current	No	-	-	-	II
P27	GBM	Male	26	Never	No	-	-	-	IV
P28	GBM	Male	56	Never	No	-	-	-	IV
P29	GBM	Male	42	Never	No	-	-	-	IV
P30	GBM	Male	67	Former or current	No	-	-	-	IV
P31	GBM	Male	54	Never	No	-	-	-	II
P32	GBM	Male	35	Former or current	No	-	-	-	II
P33	GBM	Male	35	Never	No	-	-	-	II
P34	GBM	Male	14	Never	No	-	-	-	I
P35	GBM	Female	24	Never	No	-	-	-	IV
P36	GBM	Female	34	Never	No	-	-	-	II
P37	GBM	Female	59	Never	No	-	-	-	IV
P38	GBM	Female	48	Never	No	-	-	-	IV
P39	GBM	Female	52	Never	No	-	-	-	IV
P40	GBM	Female	32	Never	No	-	-	-	II
P41	GBM	Female	52	Never	No	-	-	-	IV
P42	GBM	Male	37	Never	No	-	-	-	II
P43	LUAD	Female	54	Never	No	1b	2	0	IIIA
P44	LUAD	Male	74	Former or current	No	1a	0	0	IA1
P45	LUAD	Female	46	Never	No	1c	2	0	IIIA
P46	LUAD	Male	76	Former or current	No	1c	0	0	IA3
P47	LUAD	Female	72	Never	No	2a	0	0	IB
P48	LUAD	Female	59	Never	No	2	0	0	IB
P49	LUAD	Male	75	Former or current	No	1b	2	0	IIIA
P50	LUAD	Female	70	Never	No	2a	1	0	IIB
P51	LUAD	Male	61	Never	No	1c	0	0	IA3
P52	LUAD	Female	62	Never	No	1c	0	0	IA3
P53	LUAD	Male	74	Never	No	2b	0	0	IIA
P54	LUAD	Male	62	Former or current	No	1b	0	0	IA2
P55	LUAD	Female	67	Never	No	1c	0	0	IA3
P56	LUAD	Male	66	Former or current	No	1b	0	0	IA2
P57	LUAD	Male	54	Former or current	No	1b	0	0	IA2
P58	LUAD	Female	63	Never	No	1b	0	0	IA2
P59	LUAD	Male	79	Never	No	2b	0	0	IIA
P60	THCA	Female	56	Never	No	1a	0	0	I
P61	THCA	Male	46	Never	No	1b	0	0	I
P62	THCA	Female	32	Never	No	1a	0	0	I
P63	THCA	Male	32	Never	No	2	1b	0	I
P64	THCA	Male	46	Never	No	1b	1a	0	I
P65	THCA	Male	39	Never	No	1b	0	0	I
P66	THCA	Female	26	Never	No	1b	1a	0	I
P67	THCA	Female	32	Never	No	3a	0	0	I
P68	THCA	Female	46	Never	No	1a	0	0	I
P69	THCA	Female	30	Never	No	1b	1a	0	I
P70	THCA	Female	54	Never	No	1a	0	0	I
P71	THCA	Male	39	Never	No	1b	0	0	I
P72	THCA	Female	35	Never	No	2	0	0	I
P73	THCA	Female	35	Never	No	1b	0	0	I
P74	THCA	Female	32	Never	No	2	0	0	I
P75	THCA	Female	38	Never	No	2	1a	0	I
P76	GC	Male	73	Former or current	No	4	3	0	IIIC
P77	GC	Female	50	Never	No	3	1	0	III
P78	GC	Female	65	Never	No	4a	3	0	III
P79	GC	Male	51	Former or current	No	3	1	0	III
P80	GC	Female	34	Never	No	3	3	0	III
P81	GC	Male	55	Former or current	No	3	3	0	III
P82	GC	Male	68	Former or current	No	4b	0	0	IIIB
P83	GC	Female	68	Never	No	2	0	0	IB
P84	GC	Male	54	Never	No	3	2	0	IIIA
P85	HCC	Male	49	Never	No	3	0	0	IIIA
P86	HCC	Male	43	Former or current	Yes	1a	0	0	IA
P87	HCC	Male	54	Never	No	1b	0	0	IB
P88	HCC	Female	54	Never	No	1a	0	0	IA
P89	HCC	Male	55	Former or current	Yes	1a	0	0	IA
P90	HCC	Female	39	Never	Yes	2	0	0	II
P91	HCC	Male	62	Former or current	No	1a	0	0	IA
P92	HCC	Male	62	Never	No	1b	0	0	IB
P93	HCC	Male	56	Never	No	1b	0	0	IB
P94	HCC	Male	81	Never	No	2	0	0	II
P95	HCC	Male	64	Former or current	No	1b	0	0	IB
P96	HCC	Male	65	Former or current	No	4	0	0	IIIB
P97	HCC	Male	56	Former or current	No	1a	0	0	IA
P98	HCC	Male	69	Former or current	No	4	0	0	IIIB
P99	HCC	Male	46	Never	No	1a	0	0	IA
P100	HCC	Male	87	Former or current	No	4	0	0	IIIB
P101	HCC	Male	55	Former or current	No	1a	0	0	IA
P102	HCC	Male	67	Never	No	1a	0	0	IA
P103	CRC	Male	69	Never	No	3	0	0	IIA
P104	CRC	Female	75	Never	No	4a	0	0	IIB
P105	CRC	Male	91	Never	No	3	2a	0	IIIB
P106	CRC	Male	89	Never	No	4a	1a	0	IIIB
P107	CRC	Female	59	Never	No	3	0	0	IIA
P108	CRC	Female	77	Never	No	3	1b	0	IIIB
P109	CRC	Male	50	Former or current	No	3	1b	0	IIIB
P110	CRC	Female	46	Never	No	3	0	0	IIA
P111	CRC	Male	58	Former or current	Yes	1	0	0	I
P112	CRC	Male	56	Former or current	No	3	0	0	IIA
P113	CRC	Female	44	Never	No	4a	2b	0	IIIC
P114	CRC	Male	72	Never	No	4b	0	0	IIC
P115	CRC	Female	74	Never	No	3	2b	0	IIIC
P116	CRC	Female	64	Never	No	3	1a	0	IIIB
P117	CRC	Male	64	Former or current	Yes	3	0	0	IIA
P118	CRC	Male	39	Never	No	2	0	0	I
P119	CRC	Male	69	Never	No	4a	2a	1c	IVC
P120	CRC	Female	74	Never	No	3	0	0	IIA
P121	CRC	Male	74	Former or current	No	3	0	0	IIA
P122	CRC	Male	75	Former or current	No	3	1c	0	IIIB
