# Supplementary material for: Characterization of distinct circular RNA signatures in solid tumors
Source: Mol Cancer. 2022 Mar 2;21:63. doi: 10.1186/s12943-022-01546-4 (PMC8889743; doi:10.1186/s12943-022-01546-4)
Supplement: Supplementary file 2 — Additional file 2: Table S2. The information of 215 RBPs that associated with circRNA biogenesis. [file 12943_2022_1546_MOESM2_ESM.xlsx]

## Sheet: Table S2
Table S2. The information of 215 RBPs that associated with circRNA biogenesis.
chr	start	end	strand	gene_id	RBP	type
chr1	154554538	154600475	-	ENSG00000160710.11	ADAR	Deaminase
chr21	46493768	46646478	+	ENSG00000197381.11	ADARB1	Deaminase
chr10	1228073	1779670	-	ENSG00000185736.11	ADARB2	Deaminase
chr8	141541264	141645718	-	ENSG00000123908.7	AGO2	Endonuclease
chr1	36396319	36538101	+	ENSG00000126070.14	AGO3	Endonuclease
chr11	62201016	62323707	-	ENSG00000124942.9	AHNAK	RNA splicing
chr14	105403581	105444694	-	ENSG00000185567.6	AHNAK2	RNA splicing
chr14	20923350	20925927	+	ENSG00000100823.7	APEX1	Endonuclease
chr15	35147732	35262040	-	ENSG00000021776.6	AQR	Helicase
chr17	5336097	5352150	-	ENSG00000108561.4	C1QBP	RNA splicing
chr9	132589569	132598142	-	ENSG00000136819.10	C9orf78	RNA splicing
chr17	37617764	37721160	+	ENSG00000167258.9	CDK12	RNA splicing
chr11	47487496	47587121	-	ENSG00000149187.13	CELF1	RNA splicing
chr10	11047259	11378674	+	ENSG00000048740.13	CELF2	RNA splicing
chr1	151674880	151689290	-	ENSG00000159409.10	CELF3	RNA splicing
chr19	1259384	1274879	+	ENSG00000099622.9	CIRBP	RNA splicing
chr1	155232659	155248282	-	ENSG00000176444.14	CLK2	RNA splicing
chr15	74890841	74932057	+	ENSG00000179335.14	CLK3	RNA splicing
chr2	9563697	9613230	+	ENSG00000119203.9	CPSF3	Endonuclease
chr2	180809603	180871840	-	ENSG00000163510.9	CWC22	RNA splicing
chr19	1407568	1435719	+	ENSG00000071626.12	DAZAP1	RNA splicing
chr3	137879854	137893791	-	ENSG00000138231.8	DBR1	Endonuclease
chr10	14939358	14996431	-	ENSG00000152457.13	DCLRE1C	Endonuclease
chr2	15731302	15771235	+	ENSG00000079785.10	DDX1	Helicase
chr11	108535752	108811657	+	ENSG00000178105.5	DDX10	Helicase
chr22	38879445	38903665	-	ENSG00000100201.14	DDX17	Helicase
chr2	118572226	118589955	+	ENSG00000088205.8	DDX18	Helicase
chr16	70380732	70407286	+	ENSG00000168872.11	DDX19A	Helicase
chr16	70323566	70369186	+	ENSG00000157349.11	DDX19B	Helicase
chr1	112297867	112310638	+	ENSG00000064703.7	DDX20	Helicase
chr10	70715884	70744829	+	ENSG00000165732.8	DDX21	Helicase
chr12	49223547	49246625	-	ENSG00000174243.5	DDX23	Helicase
chr14	94517266	94547591	-	ENSG00000089737.11	DDX24	Helicase
chr20	47835884	47860614	+	ENSG00000124228.10	DDX27	Helicase
chr16	68055179	68057770	-	ENSG00000182810.5	DDX28	Helicase
chr9	135468384	135545788	-	ENSG00000125485.13	DDX31	Helicase
chr19	14519631	14530192	-	ENSG00000123136.10	DDX39A	Helicase
chr6	31497996	31510225	-	ENSG00000198563.9	DDX39B	Helicase
chrX	41192651	41223725	+	ENSG00000215301.5	DDX3X	Helicase
chrY	15016019	15032390	+	ENSG00000067048.12	DDX3Y	Helicase
chr5	176938578	176944470	-	ENSG00000183258.7	DDX41	Helicase
chr17	61850963	61896677	+	ENSG00000198231.8	DDX42	Helicase
chr6	74104471	74127292	+	ENSG00000080007.6	DDX43	Helicase
chr5	134094469	134190823	+	ENSG00000145833.11	DDX46	Helicase
chr12	12966250	12982915	+	ENSG00000213782.3	DDX47	Helicase
chr19	19030484	19039436	+	ENSG00000105671.7	DDX49	Helicase
chr17	62495734	62504317	-	ENSG00000108654.7	DDX5	Helicase
chr10	70661034	70706603	+	ENSG00000107625.8	DDX50	Helicase
chr12	132621139	132628880	-	ENSG00000185163.5	DDX51	Helicase
chr17	35969787	36003493	-	ENSG00000141141.10	DDX52	Helicase
chr12	113594979	113623284	-	ENSG00000123064.8	DDX54	Helicase
chr12	124086624	124105488	+	ENSG00000111364.11	DDX55	Helicase
chr7	44605016	44614650	-	ENSG00000136271.6	DDX56	Helicase
chr11	118620034	118661858	-	ENSG00000110367.7	DDX6	Helicase
chr4	169277886	169458937	-	ENSG00000181381.9	DDX60L	Helicase
chr4	24519064	24586173	-	ENSG00000109606.8	DHX15	Helicase
chr6	30620896	30640814	-	ENSG00000204560.5	DHX16	Helicase
chr5	54552073	54603550	-	ENSG00000067248.5	DHX29	Helicase
chr3	47844399	47891685	+	ENSG00000132153.10	DHX30	Helicase
chr17	5344232	5372380	-	ENSG00000005100.8	DHX33	Helicase
chr19	47852538	47885961	+	ENSG00000134815.14	DHX34	Helicase
chr3	153990335	154042286	-	ENSG00000174953.9	DHX36	Helicase
chr12	125431371	125473668	-	ENSG00000150990.3	DHX37	Helicase
chr16	72127461	72146811	+	ENSG00000140829.7	DHX38	Helicase
chr17	57642886	57685706	+	ENSG00000108406.5	DHX40	Helicase
chr2	39024871	39103075	-	ENSG00000163214.16	DHX57	Helicase
chr17	41561233	41621831	+	ENSG00000067596.6	DHX8	Helicase
chr1	182808504	182856886	+	ENSG00000135829.12	DHX9	Helicase
chr14	95552565	95624347	-	ENSG00000100697.10	DICER1	Endonuclease
chr13	73329540	73356234	-	ENSG00000083520.10	DIS3	Endonuclease
chr5	31400604	31532303	-	ENSG00000113360.12	DROSHA	Endonuclease
chr21	38738092	38889753	+	ENSG00000157540.15	DYRK1A	RNA splicing
chr15	74922899	74988633	-	ENSG00000179151.7	EDC3	Endonuclease
chr17	7476024	7482323	+	ENSG00000161960.10	EIF4A1	Helicase
chr3	186500994	186507689	+	ENSG00000156976.10	EIF4A2	Helicase
chr17	78109013	78120982	-	ENSG00000141543.5	EIF4A3	Helicase
chr18	48494361	48514491	+	ENSG00000141642.4	ELAC1	Endonuclease
chr17	12895708	12921504	-	ENSG00000006744.14	ELAC2	Endonuclease
chr19	45910591	45982086	-	ENSG00000012061.11	ERCC1	Endonuclease
chr8	95653302	95719694	+	ENSG00000104413.11	ESRP1	RNA splicing
chr16	68263014	68272005	-	ENSG00000103067.7	ESRP2	RNA splicing
chr7	150773711	150777953	-	ENSG00000164896.15	FASTK	RNA splicing
chr11	61560109	61564716	+	ENSG00000168496.3	FEN1	Endonuclease
chrX	146993469	147032645	+	ENSG00000102081.9	FMR1	RNA splicing
chr16	31191431	31203127	+	ENSG00000089280.14	FUS	RNA splicing
chr3	180585929	180700541	+	ENSG00000114416.13	FXR1	RNA splicing
chr17	7494548	7518189	-	ENSG00000129245.7	FXR2	RNA splicing
chr5	151150606	151192346	+	ENSG00000145907.10	G3BP1	Helicase
chr4	71681499	71705662	-	ENSG00000132463.9	GRSF1	RNA splicing
chr9	99212483	99253618	+	ENSG00000130956.9	HABP4	RNA splicing
chr20	62189439	62205592	-	ENSG00000130589.12	HELZ2	Helicase
chr12	54673977	54680872	+	ENSG00000135486.13	HNRNPA1	RNA splicing
chr7	26229547	26241149	-	ENSG00000122566.16	HNRNPA2B1	RNA splicing
chr10	43881065	43904614	-	ENSG00000169813.12	HNRNPF	RNA splicing
chr5	179041179	179061785	-	ENSG00000169045.13	HNRNPH1	RNA splicing
chrX	100663283	100669121	+	ENSG00000126945.8	HNRNPH2	RNA splicing
chr10	70090931	70102948	+	ENSG00000096746.13	HNRNPH3	RNA splicing
chr9	86582998	86595569	-	ENSG00000165119.14	HNRNPK	RNA splicing
chr19	39327028	39342987	-	ENSG00000104824.12	HNRNPL	RNA splicing
chr2	38789120	38830728	-	ENSG00000143889.11	HNRNPLL	RNA splicing
chr1	245014468	245027844	-	ENSG00000153187.12	HNRNPU	RNA splicing
chr6	31783291	31785723	+	ENSG00000204389.8	HSPA1A	RNA splicing
chr11	122928197	122933938	-	ENSG00000109971.9	HSPA8	RNA splicing
chr11	68671310	68708070	+	ENSG00000132740.4	IGHMBP2	Helicase
chr17	74708919	74722866	-	ENSG00000070495.10	JMJD6	RNA splicing
chr1	32479430	32526451	+	ENSG00000121774.13	KHDRBS1	RNA splicing
chr8	136469700	136668965	+	ENSG00000131773.9	KHDRBS3	RNA splicing
chr4	113558120	113578748	+	ENSG00000174720.11	LARP7	RNA splicing
chrX	64732462	64754655	-	ENSG00000001497.12	LAS1L	Endonuclease
chr1	53692564	53704282	-	ENSG00000162385.6	MAGOH	RNA splicing
chr3	151961617	152183569	+	ENSG00000152601.13	MBNL1	RNA splicing
chr13	97873688	98046374	+	ENSG00000139793.14	MBNL2	RNA splicing
chrX	131503345	131623996	-	ENSG00000076770.10	MBNL3	RNA splicing
chr17	2308856	2415185	-	ENSG00000127804.8	METTL16	RNA splicing
chr1	113215763	113243368	+	ENSG00000155363.14	MOV10	Helicase
chr2	224822121	224832431	+	ENSG00000135900.3	MRPL44	Endonuclease
chr9	100395908	100436030	+	ENSG00000136937.8	NCBP1	RNA splicing
chr2	232318242	232348352	-	ENSG00000115053.11	NCL	RNA splicing
chr16	69775770	69788843	-	ENSG00000141101.8	NOB1	Endonuclease
chr14	26912299	27066960	-	ENSG00000139910.15	NOVA1	RNA splicing
chr19	46436992	46476804	-	ENSG00000104967.6	NOVA2	RNA splicing
chr17	28442539	28513493	+	ENSG00000126653.11	NSRP1	RNA splicing
chr3	131100515	131107674	+	ENSG00000198585.7	NUDT16	Endonuclease
chr11	3692313	3819022	-	ENSG00000110713.11	NUP98	RNA splicing
chr14	24867992	24888494	+	ENSG00000205978.5	NYNRIN	Endonuclease
chr3	51991470	52002426	-	ENSG00000090097.16	PCBP4	RNA splicing
chr5	52083774	52099880	+	ENSG00000152684.10	PELO	Endonuclease
chr17	7387685	7417933	+	ENSG00000181222.10	POLR2A	RNA splicing
chr8	99129525	99172062	+	ENSG00000104356.6	POP1	Endonuclease
chr19	30094924	30108144	+	ENSG00000105171.5	POP4	Endonuclease
chr12	121016567	121019201	-	ENSG00000167272.6	POP5	Endonuclease
chr7	100303676	100305118	+	ENSG00000172336.4	POP7	Endonuclease
chr1	28157289	28178187	+	ENSG00000117751.13	PPP1R8	Endonuclease
chrX	48755195	48760420	+	ENSG00000102103.11	PQBP1	RNA splicing
chr1	173446405	173457946	+	ENSG00000117592.8	PRDX6	RNA splicing
chr11	60658202	60674060	-	ENSG00000110107.4	PRPF19	RNA splicing
chr19	797075	812327	+	ENSG00000011304.12	PTBP1	RNA splicing
chr1	97187221	97289294	+	ENSG00000117569.14	PTBP2	RNA splicing
chr9	114980715	115095947	-	ENSG00000119314.11	PTBP3	RNA splicing
chr8	144898514	144912029	-	ENSG00000179950.9	PUF60	RNA splicing
chr6	163835032	163999628	+	ENSG00000112531.12	QKI	RNA splicing
chr5	131891711	131980313	+	ENSG00000113522.9	RAD50	Endonuclease
chr16	6069095	7763340	+	ENSG00000078328.15	RBFOX1	RNA splicing
chr22	36134783	36424473	-	ENSG00000100320.18	RBFOX2	RNA splicing
chrX	47004268	47046212	+	ENSG00000182872.11	RBM10	RNA splicing
chr21	15588451	15600693	+	ENSG00000185272.9	RBM11	RNA splicing
chr20	34236847	34252878	-	ENSG00000244462.3	RBM12	RNA splicing
chr8	94741584	94753245	-	ENSG00000183808.7	RBM12B	RNA splicing
chr1	110881128	110889299	+	ENSG00000162775.10	RBM15	RNA splicing
chr3	51428731	51435330	+	ENSG00000179837.6	RBM15B	RNA splicing
chr10	112404155	112599227	+	ENSG00000203867.7	RBM20	RNA splicing
chr5	150070356	150080669	-	ENSG00000086589.7	RBM22	RNA splicing
chr14	23369854	23388393	-	ENSG00000100461.13	RBM23	RNA splicing
chr6	17281577	17294106	+	ENSG00000112183.10	RBM24	RNA splicing
chr14	73525144	73588122	+	ENSG00000119707.9	RBM25	RNA splicing
chrX	48432837	48437454	+	ENSG00000102317.13	RBM3	RNA splicing
chr20	55966463	55984389	+	ENSG00000132819.12	RBM38	RNA splicing
chr20	34291531	34330234	-	ENSG00000131051.16	RBM39	RNA splicing
chr11	66384097	66434153	+	ENSG00000173933.15	RBM4	RNA splicing
chr19	36119932	36128588	+	ENSG00000126254.7	RBM42	RNA splicing
chr3	50126341	50156454	+	ENSG00000003756.12	RBM5	RNA splicing
chr11	114270752	114284925	+	ENSG00000076053.6	RBM7	RNA splicing
chr1	145507598	145513536	+	ENSG00000131795.8	RBM8A	RNA splicing
chrX	135930163	135962923	-	ENSG00000147274.10	RBMX	RNA splicing
chr1	89445139	89458643	-	ENSG00000213516.5	RBMXL1	RNA splicing
chr9	4792869	4885917	+	ENSG00000120158.7	RCL1	Endonuclease
chr9	136271186	136283164	-	ENSG00000148300.7	REXO4	Endonuclease
chr6	167342992	167370679	-	ENSG00000026297.11	RNASET2	Endonuclease
chr16	2303117	2318413	-	ENSG00000205937.7	RNPS1	RNA splicing
chr6	30312908	30314661	+	ENSG00000241370.1	RPP21	Endonuclease
chr15	75246757	75249805	-	ENSG00000178718.5	RPP25	Endonuclease
chr10	92631473	92668312	+	ENSG00000148688.9	RPP30	Endonuclease
chr10	15139179	15181817	+	ENSG00000152464.10	RPP38	Endonuclease
chr6	4994966	5004297	-	ENSG00000124787.9	RPP40	Endonuclease
chr11	17095936	17099334	-	ENSG00000110700.2	RPS13	RNA splicing
chr12	56435637	56438116	+	ENSG00000197728.5	RPS26	RNA splicing
chr11	75110530	75133324	+	ENSG00000149273.10	RPS3	Endonuclease
chr21	45079429	45115958	+	ENSG00000160208.11	RRP1B	RNA splicing
chr13	21714653	21723221	+	ENSG00000150459.8	SAP18	RNA splicing
chr11	64532078	64546258	-	ENSG00000168066.16	SF1	RNA splicing
chr1	149895209	149900236	-	ENSG00000143368.9	SF3B4	RNA splicing
chr12	132195626	132284282	+	ENSG00000061936.5	SFSWAP	RNA splicing
chr6	31926857	31937532	+	ENSG00000204351.7	SKIV2L	Helicase
chr12	46751972	46766650	-	ENSG00000134294.9	SLC38A2	RNA splicing
chr17	1963133	2207065	-	ENSG00000070366.9	SMG6	Endonuclease
chr9	33041762	33076665	-	ENSG00000122692.7	SMU1	RNA splicing
chr7	127292234	127732661	+	ENSG00000197157.6	SND1	Endonuclease
chr2	96940074	96971297	-	ENSG00000144028.10	SNRNP200	Helicase
chr19	49588676	49611862	+	ENSG00000104852.10	SNRNP70	RNA splicing
chr14	78183942	78227550	-	ENSG00000100603.9	SNW1	RNA splicing
chr21	34914924	34949812	+	ENSG00000159140.13	SON	RNA splicing
chr6	35800743	35889119	-	ENSG00000096063.10	SRPK1	RNA splicing
chr7	104751151	105039755	-	ENSG00000135250.12	SRPK2	RNA splicing
chr1	24291294	24307417	-	ENSG00000188529.10	SRSF10	RNA splicing
chr6	89805678	89827800	-	ENSG00000154548.8	SRSF12	RNA splicing
chr6	36562145	36573377	+	ENSG00000112081.12	SRSF3	RNA splicing
chr1	29474255	29508499	-	ENSG00000116350.11	SRSF4	RNA splicing
chr14	70193617	70238722	+	ENSG00000100650.11	SRSF5	RNA splicing
chr20	42086568	42092245	+	ENSG00000124193.10	SRSF6	RNA splicing
chr2	38970741	38978636	-	ENSG00000115875.14	SRSF7	RNA splicing
chr12	120899471	120907596	-	ENSG00000111786.4	SRSF9	RNA splicing
chr10	70939988	70968855	+	ENSG00000156502.9	SUPV3L1	Helicase
chr8	125500726	125551699	-	ENSG00000147687.12	TATDN1	Endonuclease
chr1	36690017	36770958	+	ENSG00000054118.9	THRAP3	RNA splicing
chr2	70436576	70475792	-	ENSG00000116001.11	TIA1	RNA splicing
chr7	23544399	23571660	-	ENSG00000164548.6	TRA2A	RNA splicing
chr3	185633694	185655924	-	ENSG00000136527.13	TRA2B	RNA splicing
chr2	122494679	122525429	+	ENSG00000211460.7	TSN	Endonuclease
chr1	231664399	231702270	+	ENSG00000116918.9	TSNAX	Endonuclease
chr19	56165512	56186081	+	ENSG00000063244.8	U2AF2	RNA splicing
chr19	18942747	18979045	+	ENSG00000005007.8	UPF1	Helicase
chr4	69176105	69215807	-	ENSG00000083896.8	YTHDC1	RNA splicing
chr5	112849380	112930982	+	ENSG00000047188.11	YTHDC2	Helicase
chr12	56511943	56516278	+	ENSG00000135482.2	ZC3H10	RNA splicing
chr1	90460671	90501090	+	ENSG00000162664.12	ZNF326	RNA splicing
