# Supplementary material for: Characterization of distinct circular RNA signatures in solid tumors
Source: Mol Cancer. 2022 Mar 2;21:63. doi: 10.1186/s12943-022-01546-4 (PMC8889743; doi:10.1186/s12943-022-01546-4)
Supplement: Supplementary file 5 — Additional file 5: Table S8. The expression profiles of 1590 protein-coding genes that ubiquitously expressed in normal tissues. [file 12943_2022_1546_MOESM5_ESM.xlsx]

## Sheet: Table S8
Table S8. The expression profiles of 1590 protein-coding genes that ubiquitously expressed in normal tissues.
chr	start	end	strand	geneID	geneName	Yanai_specificity	gene_type	Esophagus_median_FPKM	Brain_median_FPKM	Lung_median_FPKM	Stomach_median_FPKM	Liver_median_FPKM	Thyroid_median_FPKM	Intestine_median_FPKM
chr2	219128850	219134980	-	ENSG00000127837.5	AAMP	0.252403	Ubiquitous	16.616	18.0229	21.9139	27.3233	22.2601	29.6791	30.2782
chr20	34824381	34858840	+	ENSG00000131043.7	AAR2	0.298271	Ubiquitous	5.94818	4.35172	9.43678	10.053	5.54008	8.70899	8.34115
chrX	74273115	74376567	-	ENSG00000131269.11	ABCB7	0.206677	Ubiquitous	8.96662	6.02559	8.58157	9.10858	8.35904	8.48578	10.405
chr14	74752126	74769759	-	ENSG00000119688.16	ABCD4	0.279654	Ubiquitous	11.2782	15.4052	18.8771	12.4858	15.0351	20.3099	14.6998
chr3	183903811	183911800	+	ENSG00000161204.7	ABCF3	0.299466	Ubiquitous	12.0756	15.4264	15.3126	13.0913	12.237	19.3667	13.2593
chr2	37423631	37443336	+	ENSG00000218739.5	AC007390.5	0.207802	Ubiquitous	13.4577	13.3959	13.3934	13.9122	7.29682	14.8308	16.0496
chr3	128598439	128634910	+	ENSG00000177646.13	ACAD9	0.220541	Ubiquitous	14.0464	11.4884	12.3956	12.4848	10.7409	15.6621	12.0919
chr20	44470360	44486045	-	ENSG00000101473.12	ACOT8	0.299747	Ubiquitous	5.63901	12.2899	11.1998	8.45676	7.68058	10.6843	13.3167
chr4	8368009	8442450	-	ENSG00000087008.11	ACOX3	0.261452	Ubiquitous	13.0092	7.72219	10.2029	9.24588	8.21699	12.4781	9.78143
chr2	264140	278283	+	ENSG00000143727.11	ACP1	0.231022	Ubiquitous	19.3699	23.4751	27.6371	21.0034	25.7452	31.1132	26.3217
chr16	89154783	89222254	+	ENSG00000176715.11	ACSF3	0.298712	Ubiquitous	6.48188	7.59729	13.1677	10.4492	8.54621	14.1298	14.3479
chr19	39138289	39222223	+	ENSG00000130402.7	ACTN4	0.299595	Ubiquitous	74.289	33.2933	84.2038	83.6115	30.7503	57.7637	74.1528
chr14	58666798	58701750	+	ENSG00000131966.9	ACTR10	0.288299	Ubiquitous	26.115	20.9303	21.6602	18.0655	9.15358	20.8137	20.8931
chr10	104238986	104262482	-	ENSG00000138107.7	ACTR1A	0.283238	Ubiquitous	18.5552	38.2848	36.5552	35.3034	13.1649	24.3429	38.6475
chr2	98272431	98280570	-	ENSG00000115073.6	ACTR1B	0.257888	Ubiquitous	13.3533	22.9005	25.2061	21.8711	13.5159	25.2027	27.4104
chr1	155023042	155035252	+	ENSG00000143537.9	ADAM15	0.293761	Ubiquitous	24.5423	12.1386	26.537	26.4863	6.65538	19.4321	23.194
chr4	99992132	100009952	-	ENSG00000197894.6	ADH5	0.226203	Ubiquitous	39.863	18.6722	37.691	39.6347	44.3824	33.9035	46.1247
chr12	1797740	1897844	+	ENSG00000006831.9	ADIPOR2	0.153086	Ubiquitous	27.2885	24.5173	24.8626	21.5875	29.1126	25.1124	24.5667
chr20	60877149	60883918	+	ENSG00000130706.8	ADRM1	0.202362	Ubiquitous	24.3458	15.8797	24.5342	28.4359	27.713	20.6434	22.9734
chr22	40742507	40786467	+	ENSG00000239900.7	ADSL	0.17741	Ubiquitous	12.4558	7.94482	10.9226	11.2915	8.19342	12.8948	12.907
chr12	19556979	19873735	+	ENSG00000139154.10	AEBP2	0.268688	Ubiquitous	9.43328	12.4375	14.2344	10.3032	5.39326	14.2676	10.803
chr19	3052908	3063105	-	ENSG00000104964.10	AES	0.281426	Ubiquitous	87.1568	121.442	111.971	135.172	48.8802	129.897	83.4415
chr8	141541264	141645718	-	ENSG00000123908.7	AGO2	0.253007	Ubiquitous	16.1065	13.1027	18.5398	16.1877	6.88763	14.644	16.1659
chr8	41434706	41482520	+	ENSG00000158669.7	AGPAT6	0.282112	Ubiquitous	8.60142	8.82719	13.9046	8.98043	9.98944	11.7977	11.6954
chr1	247002400	247095280	-	ENSG00000153207.10	AHCTF1	0.183284	Ubiquitous	16.1462	12.6306	14.3154	13.1953	8.9349	15.8533	14.1914
chr14	77924213	77935817	+	ENSG00000100591.3	AHSA1	0.246103	Ubiquitous	22.4956	19.0962	15.3413	22.1874	12.3061	17.0669	15.7586
chr17	19807615	19881656	-	ENSG00000108599.10	AKAP10	0.229708	Ubiquitous	10.1371	10.9761	11.855	9.23821	5.29778	12.5418	10.461
chr1	39456895	39471731	+	ENSG00000174574.11	AKIRIN1	0.253587	Ubiquitous	11.9355	22.4998	20.1037	20.9057	14.0947	19.1329	24.2655
chr14	105235686	105262088	-	ENSG00000142208.11	AKT1	0.264982	Ubiquitous	16.832	17.8809	39.9606	38.8712	27.5353	36.6286	40.2958
chr3	183960089	183967336	-	ENSG00000214160.5	ALG3	0.2452	Ubiquitous	7.25894	5.22874	8.9937	8.77431	11.1203	10.4691	9.63691
chr17	18086392	18113268	+	ENSG00000091542.8	ALKBH5	0.244578	Ubiquitous	17.7854	28.2735	39.9559	42.9751	25.5096	43.1071	43.5974
chr11	46417964	46615675	-	ENSG00000110497.10	AMBRA1	0.226137	Ubiquitous	8.51488	9.29975	11.9106	9.62473	5.14548	11.2902	11.4282
chr6	111195973	111216916	+	ENSG00000123505.10	AMD1	0.293947	Ubiquitous	23.0418	28.7404	22.9753	20.4424	8.29162	21.656	25.3461
chr16	2570358	2581423	+	ENSG00000162066.10	AMDHD2	0.283051	Ubiquitous	5.49906	8.28886	12.1681	8.28299	7.26642	12.0726	10.9334
chr16	56395364	56459450	-	ENSG00000159461.10	AMFR	0.218552	Ubiquitous	21.8688	29.2572	32.1531	27.2214	35.1433	30.6347	37.5966
chr2	112523848	112642267	-	ENSG00000153107.7	ANAPC1	0.284818	Ubiquitous	10.2136	7.47904	8.6726	5.85775	4.2057	8.45031	9.16194
chr17	79848666	79858867	+	ENSG00000141552.13	ANAPC11	0.244933	Ubiquitous	16.9247	13.1702	18.5871	20.3933	23.2659	18.0955	18.2333
chr9	140069236	140082989	-	ENSG00000176248.7	ANAPC2	0.250704	Ubiquitous	8.53099	11.8882	15.489	10.7005	10.1312	15.4396	12.9446
chr4	25378835	25420120	+	ENSG00000053900.6	ANAPC4	0.240687	Ubiquitous	12.3734	11.9975	14.267	10.0364	6.06948	14.7498	12.4545
chr12	121746048	121837699	-	ENSG00000089053.8	ANAPC5	0.214151	Ubiquitous	23.3488	28.6078	28.3356	19.8596	17.0499	31.4562	31.1174
chr1	213165524	213189168	-	ENSG00000174606.8	ANGEL2	0.238245	Ubiquitous	12.9119	16.6567	17.7166	13.2656	8.36171	16.1249	13.6533
chr5	139781493	139929154	+	ENSG00000254996.1	ANKHD1-EIF4EBP3	0.257692	Ubiquitous	11.4036	4.50162	9.86193	9.47446	6.21803	10.4007	10.333
chr7	16639401	16685442	-	ENSG00000106524.4	ANKMY2	0.261377	Ubiquitous	6.58464	10.2587	8.46279	8.96825	3.66817	10.8927	10.3312
chr1	70726271	70820417	-	ENSG00000118454.8	ANKRD13C	0.229293	Ubiquitous	8.68381	10.2848	9.3937	8.26161	4.36526	8.03633	8.81866
chr4	73939093	74124515	-	ENSG00000132466.13	ANKRD17	0.187989	Ubiquitous	26.5085	28.5238	23.993	23.9258	15.1283	24.9814	24.433
chr3	15708743	15901278	-	ENSG00000206560.6	ANKRD28	0.2561	Ubiquitous	13.9552	19.4467	22.0952	15.4908	10.4083	20.5632	18.7554
chr15	69070874	69113236	-	ENSG00000140350.11	ANP32A	0.259164	Ubiquitous	17.7091	29.0149	30.5277	22.5989	14.4451	27.0829	24.8452
chr1	150190717	150208504	-	ENSG00000143401.10	ANP32E	0.273285	Ubiquitous	8.64138	9.63062	8.59762	7.09062	3.90177	10.2866	6.99038
chr2	69871557	70053596	+	ENSG00000196975.10	ANXA4	0.294679	Ubiquitous	18.2257	9.47206	37.2432	37.5412	33.8078	26.6272	33.4955
chr5	150480273	150537443	-	ENSG00000197043.9	ANXA6	0.273156	Ubiquitous	33.923	44.187	63.9096	67.8574	49.8799	47.7735	56.2574
chr10	75134859	75173834	-	ENSG00000138279.11	ANXA7	0.263606	Ubiquitous	26.7486	24.9174	35.2541	28.5196	29.9289	41.5447	38.1911
chr22	29723669	29819168	-	ENSG00000100280.12	AP1B1	0.198845	Ubiquitous	22.417	20.6219	21.3786	19.6569	13.4533	20.4214	24.5373
chr16	71762913	71843104	-	ENSG00000166747.8	AP1G1	0.240294	Ubiquitous	26.5951	24.2682	33.4031	26.411	18.2574	28.4646	28.2627
chr19	16308389	16346160	+	ENSG00000072958.4	AP1M1	0.283949	Ubiquitous	9.16978	16.26	18.1313	14.6638	16.3569	11.5179	9.92954
chr11	924894	1012239	+	ENSG00000183020.9	AP2A2	0.294345	Ubiquitous	11.8523	20.449	22.6009	17.2467	14.4533	14.4091	17.28
chr19	2100988	2164464	-	ENSG00000065000.11	AP3D1	0.223838	Ubiquitous	15.3585	23.5521	25.5793	25.2184	16.2829	28.7296	27.8017
chr10	75881524	75910821	-	ENSG00000185009.8	AP3M1	0.221219	Ubiquitous	15.411	9.07538	15.9608	14.6648	8.39859	14.9642	16.7943
chr1	114437370	114447823	-	ENSG00000134262.8	AP4B1	0.26889	Ubiquitous	7.65181	8.70943	11.0107	7.27437	3.65031	11.1053	10.4186
chr1	150237804	150241980	-	ENSG00000117362.8	APH1A	0.260932	Ubiquitous	16.2873	8.86699	22.8799	13.6782	18.8664	22.1573	21.6025
chr11	43333513	43366079	+	ENSG00000166181.8	API5	0.222378	Ubiquitous	17.5329	24.9785	28.7075	26.0564	18.7308	31.5326	31.6217
chr1	156561554	156564091	+	ENSG00000163382.7	APOA1BP	0.230714	Ubiquitous	11.8054	18.7653	14.7398	19.182	17.4549	21.6637	18.0464
chr3	57261765	57307496	+	ENSG00000157500.6	APPL1	0.200577	Ubiquitous	16.5486	14.8979	16.2451	12.2132	5.36866	15.9185	14.7327
chr16	88875747	88878352	-	ENSG00000198931.6	APRT	0.299306	Ubiquitous	23.9796	9.94035	24.4176	22.9649	34.0328	31.9122	29.8648
chr9	32972604	33025166	-	ENSG00000137074.14	APTX	0.167573	Ubiquitous	10.0199	10.906	9.91241	8.85043	6.74349	9.37717	9.56721
chr15	35147732	35262040	-	ENSG00000021776.6	AQR	0.221332	Ubiquitous	13.2119	10.0707	13.9426	10.3775	5.70418	13.5085	12.2672
chrX	47420516	47431307	+	ENSG00000078061.8	ARAF	0.225685	Ubiquitous	12.5253	6.68244	20.465	17.6917	18.4948	20.1649	19.5192
chr11	118443105	118473748	+	ENSG00000095139.9	ARCN1	0.271383	Ubiquitous	10.9727	10.9961	16.0745	19.347	11.7788	16.2162	18.5409
chr1	228270361	228286912	+	ENSG00000143761.9	ARF1	0.224096	Ubiquitous	76.6409	61.7898	108.223	102.096	62.7334	99.0487	101.515
chr7	127228399	127231759	+	ENSG00000004059.6	ARF5	0.229196	Ubiquitous	41.1897	32.075	34.4329	32.4727	24.3214	29.764	37.4289
chr20	61904137	61921142	+	ENSG00000101199.8	ARFGAP1	0.259863	Ubiquitous	7.74265	20.1583	20.8398	22.2224	11.8842	23.462	21.3432
chr11	47185848	47198676	-	ENSG00000149182.10	ARFGAP2	0.23986	Ubiquitous	21.8097	23.619	34.5049	26.4296	21.8869	33.8185	29.8076
chr8	68085747	68255912	-	ENSG00000066777.4	ARFGEF1	0.252947	Ubiquitous	22.7113	12.5353	20.1788	17.707	9.02491	20.9106	21.4428
chr11	6496910	6502666	-	ENSG00000132254.8	ARFIP2	0.292689	Ubiquitous	12.4488	11.1152	12.8499	13.2028	9.47165	17.7662	16.3091
chr20	62329996	62339377	-	ENSG00000101246.15	ARFRP1	0.294152	Ubiquitous	6.43634	8.79845	12.4936	12.1861	7.46921	13.8544	11.291
chr11	46698630	46722165	-	ENSG00000175220.7	ARHGAP1	0.256199	Ubiquitous	25.9757	23.0294	27.1815	33.2167	13.0603	27.6693	31.3234
chr10	32094365	32217742	-	ENSG00000165322.13	ARHGAP12	0.209116	Ubiquitous	11.6187	14.5173	15.6142	16.1783	9.4378	16.2306	17.6168
chr16	24930706	25026987	-	ENSG00000140750.12	ARHGAP17	0.289618	Ubiquitous	19.4662	10.7015	22.1696	17.0267	9.04673	16.5287	21.7233
chr19	47421933	47508334	+	ENSG00000160007.13	ARHGAP35	0.297965	Ubiquitous	16.1697	28.7424	23.3068	19.2935	17.7164	22.3529	22.2297
chr1	156904632	157015162	-	ENSG00000132694.14	ARHGEF11	0.218939	Ubiquitous	8.61671	15.1918	14.9004	13.725	5.57508	13.3414	15.0356
chr12	46123448	46301823	+	ENSG00000189079.11	ARID2	0.277763	Ubiquitous	14.1041	7.02273	13.0607	10.8382	5.15851	13.148	11.8907
chr15	72766667	72879692	+	ENSG00000166233.8	ARIH1	0.286923	Ubiquitous	13.6213	16.8534	23.4433	19.4992	10.7131	19.4787	20.1355
chr3	48956254	49023815	+	ENSG00000177479.15	ARIH2	0.218967	Ubiquitous	19.3952	24.2589	26.6662	23.6465	15.5659	29.4793	28.6129
chr17	79648204	79650954	-	ENSG00000214087.4	ARL16	0.271528	Ubiquitous	4.54444	10.509	9.24748	9.9516	6.49945	11.3629	8.91336
chr2	152645498	152685006	-	ENSG00000162980.12	ARL5A	0.288353	Ubiquitous	18.5911	15.3659	22.1674	14.9853	9.69591	20.7386	15.2757
chr7	102715328	102740205	+	ENSG00000170632.9	ARMC10	0.268803	Ubiquitous	8.12371	13.1797	13.0324	11.2181	8.35213	15.8154	15.4792
chr3	137906109	138017231	+	ENSG00000114098.13	ARMC8	0.18104	Ubiquitous	18.2767	19.1397	20.7107	18.3242	8.36935	17.5628	20.0945
chr7	98923521	98985787	+	ENSG00000241685.4	ARPC1A	0.266589	Ubiquitous	37.6847	22.5239	32.7505	29.8494	18.4672	34.5527	39.9568
chr3	9834179	9849410	+	ENSG00000241553.8	ARPC4	0.253988	Ubiquitous	48.2526	26.4078	44.8776	44.0163	21.8708	41.8832	50.783
chr22	51061182	51066607	-	ENSG00000100299.13	ARSA	0.287132	Ubiquitous	8.11017	11.2039	17.3723	14.661	16.9956	20.4404	19.0848
chr12	48541571	48574996	-	ENSG00000177981.6	ASB8	0.222677	Ubiquitous	9.17681	12.9209	12.0079	13.3134	8.22813	12.6974	14.6538
chr10	73856278	73976892	-	ENSG00000138303.13	ASCC1	0.261935	Ubiquitous	7.80008	10.802	8.94506	8.58133	6.14736	9.66288	6.69859
chr1	155305059	155532598	-	ENSG00000116539.6	ASH1L	0.230924	Ubiquitous	22.8778	27.353	22.0424	22.3874	9.63604	26.7377	22.538
chr8	37962760	38001594	+	ENSG00000129691.11	ASH2L	0.179324	Ubiquitous	13.6544	12.3362	14.754	12.7758	7.74149	13.3146	15.1453
chr19	12847953	12859137	+	ENSG00000198356.7	ASNA1	0.241647	Ubiquitous	16.1261	17.6953	14.146	16.0293	8.12473	18.7218	13.0651
chr2	190526111	190535557	+	ENSG00000138381.5	ASNSD1	0.188986	Ubiquitous	8.80827	11.9324	13.2586	12.214	9.02473	12.0224	10.516
chr8	62413116	62627155	-	ENSG00000198363.11	ASPH	0.150454	Ubiquitous	44.5006	38.3338	42.1333	38.1748	24.1089	44.3588	39.7225
chr10	89511269	89601100	-	ENSG00000138138.9	ATAD1	0.197432	Ubiquitous	12.2515	13.9495	15.3368	11.4232	8.11974	13.4178	15.4709
chr2	175936978	176033110	-	ENSG00000115966.12	ATF2	0.287772	Ubiquitous	16.9552	20.9728	21.3294	15.4618	11.1532	24.3008	17.974
chr1	161736084	161933860	+	ENSG00000118217.5	ATF6	0.22584	Ubiquitous	10.6904	9.08225	14.4033	10.9428	10.5999	13.3666	12.2207
chr5	115163893	115177555	-	ENSG00000145782.8	ATG12	0.144889	Ubiquitous	15.1103	15.0237	16.4877	12.6048	10.4706	16.6287	15.6194
chr2	234118697	234204320	+	ENSG00000085978.17	ATG16L1	0.21536	Ubiquitous	6.92512	9.75484	9.31726	8.59154	5.88834	10.7856	10.8888
chr14	96747595	96830207	-	ENSG00000066739.7	ATG2B	0.176157	Ubiquitous	11.2327	12.6987	12.8703	7.55166	9.58431	13.0141	10.3916
chr3	112251356	112280893	-	ENSG00000144848.6	ATG3	0.224033	Ubiquitous	20.9188	15.5404	18.0196	15.6468	11.0912	20.098	16.9978
chr2	242576628	242613272	+	ENSG00000168397.12	ATG4B	0.257243	Ubiquitous	15.902	21.3513	20.6889	17.6754	14.1356	25.1906	22.5099
chr2	220074494	220094439	-	ENSG00000198925.6	ATG9A	0.266056	Ubiquitous	9.33083	18.2499	15.3087	14.077	12.2559	13.0838	16.31
chr2	216176540	216214487	+	ENSG00000138363.10	ATIC	0.279596	Ubiquitous	14.1417	15.5332	9.97739	13.2335	9.62844	11.7772	17.1875
chr11	108093211	108239829	+	ENSG00000149311.13	ATM	0.269636	Ubiquitous	22.5876	19.71	27.5773	17.3678	13.1741	25.0006	23.009
chr16	81069452	81080963	+	ENSG00000166454.5	ATMIN	0.258401	Ubiquitous	12.2389	14.1574	10.773	10.1989	6.59925	14.7903	11.8435
chr17	46970127	46973233	+	ENSG00000159199.9	ATP5G1	0.269269	Ubiquitous	19.4767	18.3836	11.3781	25.1763	21.8403	25.0039	27.657
chr1	44440159	44443967	+	ENSG00000117410.9	ATP6V0B	0.224146	Ubiquitous	14.9325	29.1347	35.9356	26.9274	30.5666	33.7485	36.7864
chr18	76829285	77138283	+	ENSG00000166377.15	ATP9B	0.252253	Ubiquitous	12.4322	15.6416	17.707	15.1177	7.49427	18.2768	13.6057
chr6	16299343	16761722	-	ENSG00000124788.13	ATXN1	0.225408	Ubiquitous	22.3383	24.9623	25.5907	18.2103	11.3084	21.9329	20.1818
chr22	46067678	46241187	+	ENSG00000130638.11	ATXN10	0.27182	Ubiquitous	21.1134	29.9589	24.7706	17.3483	18.1004	27.3907	22.1694
chr12	111890018	112037480	-	ENSG00000204842.10	ATXN2	0.270229	Ubiquitous	20.5083	24.1715	23.0427	17.6286	12.2714	16.414	15.9731
chr16	28834356	28848558	+	ENSG00000168488.14	ATXN2L	0.201596	Ubiquitous	21.6506	25.7913	25.3139	21.599	12.6117	24.4749	17.901
chr9	93976097	94124195	-	ENSG00000148090.7	AUH	0.205155	Ubiquitous	10.1376	10.7383	12.3372	12.5289	11.2848	14.7291	13.2176
chr2	74753772	74757066	-	ENSG00000115307.12	AUP1	0.196551	Ubiquitous	21.5516	16.7355	31.6886	29.0045	30.9855	33.7515	32.7397
chr7	69063905	70258054	+	ENSG00000158321.11	AUTS2	0.268864	Ubiquitous	16.9226	16.8918	15.4108	13.1007	11.0225	6.03555	11.775
chr10	99437181	99447080	-	ENSG00000119986.6	AVPI1	0.280682	Ubiquitous	10.0737	3.94938	10.3693	8.83563	10.4567	3.39193	8.51004
chr3	28356494	28390618	-	ENSG00000163512.9	AZI2	0.248638	Ubiquitous	13.874	9.71024	13.8892	10.7259	6.1044	12.609	9.59138
chr8	103838585	103906092	-	ENSG00000155096.9	AZIN1	0.222594	Ubiquitous	30.0704	41.8196	45.7823	41.1208	25.8159	41.6264	48.5022
chr1	161141100	161147287	-	ENSG00000158850.10	B4GALT3	0.268873	Ubiquitous	6.41116	5.9242	9.7906	7.80754	4.95965	10.0244	10.2393
chr19	17378159	17392058	+	ENSG00000105393.11	BABAM1	0.186857	Ubiquitous	13.8738	20.6178	18.5833	19.457	12.4075	16.2757	19.9939
chr11	64037302	64052176	-	ENSG00000002330.9	BAD	0.217019	Ubiquitous	16.3826	17.2923	20.0646	23.1343	13.6521	21.9408	19.3497
chr14	104022881	104029168	-	ENSG00000166170.9	BAG5	0.293318	Ubiquitous	11.0839	9.12576	11.5948	9.92039	4.10121	13.4818	11.338
chr7	72854728	72936608	-	ENSG00000009954.6	BAZ1B	0.155057	Ubiquitous	8.94781	8.66515	9.93439	10.2327	5.37316	10.3863	9.50159
chrX	152965947	152990152	-	ENSG00000185825.11	BCAP31	0.290813	Ubiquitous	15.1621	13.1711	27.348	19.411	17.2632	28.0918	27.1787
chr16	75262928	75301951	-	ENSG00000050820.12	BCAR1	0.289242	Ubiquitous	9.52674	22.7779	27.2796	26.5533	11.5065	20.467	25.5037
chr17	58754814	59470199	+	ENSG00000141376.16	BCAS3	0.275145	Ubiquitous	11.8452	13.9459	14.3599	9.48331	6.73736	12.4051	8.03603
chr22	18111621	18213388	+	ENSG00000099968.13	BCL2L13	0.198807	Ubiquitous	15.3796	21.4468	18.9813	16.3357	16.3489	16.6567	19.3961
chr6	136578001	136610989	-	ENSG00000029363.11	BCLAF1	0.265135	Ubiquitous	41.9294	38.1876	51.1972	40.6728	23.3817	54.2607	43.8772
chr7	93592074	93633694	-	ENSG00000105829.7	BET1	0.279863	Ubiquitous	7.73882	5.38141	9.8605	8.30323	6.78219	11.1763	10.2247
chr8	22477931	22526661	-	ENSG00000147439.7	BIN3	0.245164	Ubiquitous	12.0308	5.98361	12.5277	12.943	5.68584	13.168	10.4671
chr11	102217942	102249401	+	ENSG00000110330.4	BIRC2	0.282594	Ubiquitous	11.4862	13.6355	22.6727	14.9894	16.137	19.4745	21.8706
chr2	32582096	32843966	+	ENSG00000115760.9	BIRC6	0.235679	Ubiquitous	34.1307	23.1882	29.865	21.4554	17.9218	33.1195	30.9711
chr13	103451399	103493885	+	ENSG00000134897.9	BIVM	0.195256	Ubiquitous	8.51234	13.2267	12.229	9.80628	11.4419	13.7009	10.9378
chr20	36120874	36156333	-	ENSG00000166619.8	BLCAP	0.266046	Ubiquitous	29.0342	34.8912	29.5195	24.8685	24.893	30.9638	39.5507
chr17	28575218	28619074	-	ENSG00000108578.10	BLMH	0.297445	Ubiquitous	12.8977	8.33775	11.3855	8.3584	5.94347	10.5459	9.79684
chr10	22610140	22620413	+	ENSG00000168283.9	BMI1	0.245051	Ubiquitous	14.1577	19.693	22.1464	18.6379	12.427	17.2311	18.1697
chr8	22022249	22069839	+	ENSG00000168487.13	BMP1	0.28703	Ubiquitous	6.95644	3.41514	9.72332	6.54964	10.2696	8.38824	8.89858
chr22	50166931	50221160	-	ENSG00000100425.14	BRD1	0.263141	Ubiquitous	8.65527	8.45947	15.2534	14.059	7.46904	13.9217	14.8732
chr9	136895427	136933657	-	ENSG00000169925.12	BRD3	0.282818	Ubiquitous	6.65089	10.5789	11.6446	12.2628	4.18764	12.8862	10.1256
chr19	15347647	15443356	-	ENSG00000141867.13	BRD4	0.193226	Ubiquitous	22.7973	21.5391	27.3411	23.6566	16.3791	26.6928	21.2836
chr2	28112808	28561768	+	ENSG00000158019.16	BRE	0.14083	Ubiquitous	12.3967	11.7607	13.6908	13.4302	7.21466	13.484	12.29
chr1	222885895	222908538	+	ENSG00000162819.7	BROX	0.239307	Ubiquitous	21.4599	15.203	19.9955	16.0145	8.32096	17.9802	20.4322
chr1	32830704	32860332	-	ENSG00000160058.14	BSDC1	0.15272	Ubiquitous	12.0824	18.0834	21.0679	18.8084	20.0817	19.6946	18.3517
chr10	93683526	93790082	+	ENSG00000095564.9	BTAF1	0.209611	Ubiquitous	18.8423	11.8248	18.1322	13.962	10.6802	16.7105	18.0469
chr1	52521797	52556388	+	ENSG00000134717.13	BTF3L4	0.22702	Ubiquitous	10.8379	16.781	15.349	13.747	8.42113	16.3243	13.149
chr10	124913793	124924886	+	ENSG00000154473.13	BUB3	0.285038	Ubiquitous	28.9377	17.5896	26.1776	21.2416	13.6567	26.2488	31.2026
chr2	201675317	201688569	+	ENSG00000082153.13	BZW1	0.248421	Ubiquitous	53.7846	26.7749	45.8574	34.2522	51.9982	37.22	46.4378
chr10	127408084	127452712	+	ENSG00000107938.13	C10orf137	0.267249	Ubiquitous	8.03549	7.67201	9.54985	7.67405	3.6844	10.1621	8.06207
chr10	103605356	103815950	-	ENSG00000120029.8	C10orf76	0.243059	Ubiquitous	9.07474	6.90117	10.9357	8.8646	5.1212	8.78952	10.915
chr11	57508825	57510986	+	ENSG00000211450.5	C11orf31	0.254812	Ubiquitous	28.0597	16.1097	22.1841	17.7061	29.8551	26.4976	22.9288
chr11	16634679	16778428	+	ENSG00000110696.5	C11orf58	0.263207	Ubiquitous	42.8467	42.5862	54.097	53.9823	33.9372	62.185	47.4554
chr11	65684279	65686588	-	ENSG00000175573.6	C11orf68	0.24715	Ubiquitous	7.55903	13.0222	13.8057	11.8372	5.55217	14.3225	12.9197
chr11	86013253	86056969	+	ENSG00000149196.11	C11orf73	0.259994	Ubiquitous	10.0918	10.7831	11.2954	12.0985	5.64691	10.583	13.6258
chr12	52463030	52471278	+	ENSG00000123395.10	C12orf44	0.200985	Ubiquitous	7.8047	6.70947	11.0171	10.1251	8.47534	10.1309	9.57159
chr12	7052141	7055166	+	ENSG00000111678.6	C12orf57	0.285686	Ubiquitous	15.85	12.9832	20.8074	22.3219	12.472	21.1837	12.3727
chr14	104378625	104394606	-	ENSG00000156411.5	C14orf2	0.294935	Ubiquitous	33.8529	32.8592	15.0449	28.9897	20.0229	22.8749	23.4193
chr16	19566562	19718115	+	ENSG00000103544.10	C16orf62	0.296921	Ubiquitous	14.4545	21.6368	16.5116	14.6762	7.59092	20.6487	17.3923
chr16	9185505	9215497	+	ENSG00000182831.7	C16orf72	0.163313	Ubiquitous	12.404	8.50186	12.8631	10.8077	7.53513	12.8503	12.4752
chr16	58147496	58163354	-	ENSG00000070761.3	C16orf80	0.273473	Ubiquitous	7.70165	11.2546	12.6869	7.55958	9.17061	12.0964	7.52145
chr17	3714460	3749545	-	ENSG00000074356.12	C17orf85	0.226246	Ubiquitous	12.2767	14.4941	16.7315	13.1292	6.59331	15.8477	15.3352
chr19	12841454	12845589	-	ENSG00000123144.6	C19orf43	0.248563	Ubiquitous	42.2712	25.127	34.1908	42.8693	35.9739	31.7473	23.9713
chr19	18699495	18703146	+	ENSG00000006015.13	C19orf60	0.291345	Ubiquitous	8.41552	13.7796	15.2641	13.0287	17.2701	12.7415	10.202
chr1	53679771	53686289	-	ENSG00000162384.9	C1orf123	0.285662	Ubiquitous	8.78994	14.3022	14.9941	15.6996	8.45661	17.8256	14.1583
chr1	186344890	186390510	+	ENSG00000157181.10	C1orf27	0.28616	Ubiquitous	5.39573	8.63039	9.27271	7.55378	6.72046	10.6513	8.04685
chr1	154179182	154193104	-	ENSG00000143612.14	C1orf43	0.206807	Ubiquitous	33.9053	44.5506	57.7611	43.6946	54.7248	44.7046	53.3145
chr17	5336097	5352150	-	ENSG00000108561.4	C1QBP	0.269532	Ubiquitous	36.9048	23.0941	20.2583	28.0825	28.918	24.8031	36.5907
chr22	19338891	19435755	-	ENSG00000242259.4	C22orf39	0.244007	Ubiquitous	6.38961	14.3038	11.8378	13.9205	4.73655	13.6948	14.3022
chr12	22601517	22697480	-	ENSG00000111731.8	C2CD5	0.297583	Ubiquitous	17.4784	23.9489	17.6357	17.6289	6.45125	21.6684	20.0698
chr5	41904290	41921738	+	ENSG00000205765.4	C5orf51	0.275638	Ubiquitous	9.8408	11.7541	8.97248	8.5609	4.63244	9.83631	9.24262
chr6	34555065	34664636	-	ENSG00000196821.5	C6orf106	0.221651	Ubiquitous	21.2953	22.189	31.4691	27.6327	25.6851	24.6524	25.5094
chr6	170102233	170106401	+	ENSG00000185127.5	C6orf120	0.278515	Ubiquitous	7.45301	8.01631	9.85333	8.95373	8.97814	7.40631	11.7029
chr6	24705089	24721064	-	ENSG00000112308.8	C6orf62	0.296234	Ubiquitous	30.6486	30.1407	45.2131	28.4999	25.0757	43.9416	32.6103
chr9	27546544	27573864	-	ENSG00000147894.10	C9orf72	0.23689	Ubiquitous	7.09911	10.3126	10.2821	5.8877	7.12678	9.13649	7.68585
chr10	120433679	120514761	-	ENSG00000151893.10	CACUL1	0.250954	Ubiquitous	16.1278	13.9547	18.6511	13.5283	8.97353	14.0808	17.1582
chr5	134074191	134087847	+	ENSG00000164615.3	CAMLG	0.277272	Ubiquitous	11.8983	11.8072	8.26654	10.8879	3.81951	7.90344	8.91089
chr12	67663061	67713731	+	ENSG00000111530.8	CAND1	0.226356	Ubiquitous	19.3028	19.8308	19.7615	15.3441	10.3329	22.3412	19.1325
chr11	34073230	34122703	+	ENSG00000135387.15	CAPRIN1	0.169527	Ubiquitous	61.0478	49.605	61.6225	49.4491	27.53	61.0244	58.3987
chr13	111267881	111292340	+	ENSG00000213995.7	CARKD	0.218937	Ubiquitous	7.50761	15.2765	15.259	16.0044	19.4917	19.6753	19.8905
chr11	3022152	3078843	-	ENSG00000110619.12	CARS	0.222078	Ubiquitous	9.60428	11.7961	11.3713	11.8087	11.174	15.0422	14.4556
chr13	111293759	111365950	-	ENSG00000134905.12	CARS2	0.270947	Ubiquitous	15.452	12.375	23.1843	17.5434	13.1479	21.1262	21.771
chr3	105374305	105588396	-	ENSG00000114423.14	CBLB	0.273173	Ubiquitous	11.6513	3.59406	11.3788	11.0124	5.63893	10.6478	8.53887
chr9	70432004	70497240	-	ENSG00000147996.12	CBWD5	0.282201	Ubiquitous	13.601	11.9829	12.1207	9.49554	12.3784	16.1529	9.98866
chr7	26240782	26252976	+	ENSG00000122565.14	CBX3	0.25711	Ubiquitous	22.9778	27.9493	37.1987	31.3508	24.292	34.9515	40.0957
chr22	39052641	39069859	+	ENSG00000100211.6	CBY1	0.260577	Ubiquitous	8.11178	7.26762	9.09615	10.9904	4.03024	10.7521	9.50155
chr8	22462145	22479027	+	ENSG00000158941.12	CCAR2	0.178386	Ubiquitous	14.4126	20.0406	20.0161	16.5731	8.18071	19.599	20.0122
chr1	89401456	89458636	-	ENSG00000137944.12	CCBL2	0.247208	Ubiquitous	12.8047	8.52089	9.57432	10.6843	6.62655	11.9969	10.4326
chr22	29168662	29185283	+	ENSG00000159873.5	CCDC117	0.294162	Ubiquitous	5.73916	4.89984	10.7614	9.20025	9.10357	12.1391	11.7051
chr7	92861653	92988338	+	ENSG00000004766.11	CCDC132	0.241049	Ubiquitous	14.2105	13.8436	11.5506	9.15361	4.63459	11.4627	14.0655
chr8	27590835	27630170	-	ENSG00000147419.12	CCDC25	0.106563	Ubiquitous	10.535	10.178	7.93881	10.8755	8.89281	10.7351	10.0195
chr17	61822610	61853711	-	ENSG00000108588.9	CCDC47	0.178374	Ubiquitous	29.5321	19.331	26.2837	25.8228	22.0757	23.9513	28.1215
chr3	191046866	191116459	+	ENSG00000152492.9	CCDC50	0.272322	Ubiquitous	18.0948	11.0719	26.9074	19.8728	19.2673	26.3969	22.7758
chr12	102406705	102455927	-	ENSG00000120860.6	CCDC53	0.222767	Ubiquitous	14.6944	14.518	13.9916	14.4915	8.55057	17.0789	13.3995
chr12	28286182	28732883	+	ENSG00000123106.6	CCDC91	0.247486	Ubiquitous	14.9863	17.5626	13.181	13.1191	6.63535	16.2117	15.1634
chr7	45039074	45116068	+	ENSG00000136280.11	CCM2	0.232161	Ubiquitous	7.65498	13.5802	12.1609	11.0393	12.7674	8.33677	10.6052
chr6	99990256	100016849	-	ENSG00000112237.8	CCNC	0.294439	Ubiquitous	19.9756	13.7761	17.9389	15.0638	15.8967	23.5777	17.1618
chr5	86687311	86708836	-	ENSG00000134480.9	CCNH	0.259117	Ubiquitous	20.0926	25.5929	24.2656	16.0899	12.5986	22.5795	18.1419
chr14	99947506	100001381	+	ENSG00000090061.13	CCNK	0.250529	Ubiquitous	13.0868	7.30001	12.1504	11.0842	5.12549	11.8157	11.3732
chr1	1321091	1334708	-	ENSG00000221978.7	CCNL2	0.291484	Ubiquitous	23.0297	31.3397	48.6472	34.1514	37.1601	50.5665	40.6352
chr12	49082247	49110681	-	ENSG00000129315.5	CCNT1	0.226867	Ubiquitous	9.08883	7.99135	11.2732	9.35699	5.59145	11.6055	10.5338
chr2	135675805	135716912	+	ENSG00000082258.8	CCNT2	0.284319	Ubiquitous	13.5501	18.0189	23.4647	15.8758	13.6634	20.0853	19.5661
chr10	35535953	35860852	+	ENSG00000108100.13	CCNY	0.289006	Ubiquitous	11.388	20.1795	23.957	17.9708	12.5323	20.6805	19.4486
chr15	55632230	55700708	-	ENSG00000260916.1	CCPG1	0.236491	Ubiquitous	10.2157	19.3332	22.567	19.0756	18.8265	24.169	20.7013
chr10	86088342	86278273	+	ENSG00000107771.11	CCSER2	0.290611	Ubiquitous	16.6425	23.5003	20.0749	21.0818	6.151	17.6853	18.3898
chr1	156278759	156337664	-	ENSG00000163468.10	CCT3	0.234283	Ubiquitous	44.9982	31.1109	27.7482	42.083	29.4527	37.7255	38.615
chr2	62095224	62115939	-	ENSG00000115484.10	CCT4	0.214618	Ubiquitous	33.6005	26.3669	30.22	31.4573	19.1196	37.2659	34.8435
chr2	73460548	73480149	+	ENSG00000135624.11	CCT7	0.186868	Ubiquitous	44.3416	32.9023	35.9835	41.8812	26.8521	37.9272	40.787
chr10	12237964	12292588	+	ENSG00000151465.9	CDC123	0.236007	Ubiquitous	19.0006	16.763	17.4112	15.5999	10.4292	18.0066	21.2066
chr13	115000362	115038198	+	ENSG00000130177.10	CDC16	0.255008	Ubiquitous	24.9079	22.6161	29.6795	20.1535	16.5961	31.5946	27.273
chr19	531714	542097	+	ENSG00000099804.4	CDC34	0.274756	Ubiquitous	9.03797	18.6105	17.4308	21.0373	23.3909	16.3845	19.2837
chr19	10501810	10530797	-	ENSG00000105401.2	CDC37	0.269772	Ubiquitous	23.1508	21.9954	31.8816	32.9329	16.1961	29.099	21.9681
chr6	110501344	110575478	+	ENSG00000168438.10	CDC40	0.235818	Ubiquitous	8.22439	9.74184	9.98659	7.37221	6.36652	11.1327	9.35308
chr1	22379120	22419437	+	ENSG00000070831.11	CDC42	0.286528	Ubiquitous	89.0215	51.3555	103.998	92.6452	44.7309	74.9553	92.488
chr14	103398716	103523799	-	ENSG00000198752.5	CDC42BPB	0.26921	Ubiquitous	22.3835	30.4011	33.1141	25.635	15.3917	26.0903	25.2949
chr1	193091147	193223031	+	ENSG00000134371.9	CDC73	0.206866	Ubiquitous	13.7654	10.2199	14.2362	13.3719	5.21849	14.8312	13.767
chr16	29869678	29875057	-	ENSG00000103502.9	CDIPT	0.24845	Ubiquitous	11.6919	17.3388	26.2135	24.1497	17.8848	24.2698	22.8693
chr17	37617764	37721160	+	ENSG00000167258.9	CDK12	0.229667	Ubiquitous	16.9158	15.1805	20.3464	20.0089	14.2494	22.6218	17.8569
chr7	39989636	40136733	+	ENSG00000065883.10	CDK13	0.245875	Ubiquitous	15.0729	10.0037	13.1676	11.606	7.91051	14.9632	10.5499
chr20	31946645	31989367	-	ENSG00000101391.16	CDK5RAP1	0.262286	Ubiquitous	6.82825	8.74478	9.36025	6.74177	5.01981	10.0726	7.88933
chr9	123151147	123342448	-	ENSG00000136861.13	CDK5RAP2	0.138854	Ubiquitous	10.962	11.6735	11.0119	10.2884	7.96105	10.8624	9.22969
chr12	12867992	12875305	+	ENSG00000111276.6	CDKN1B	0.23207	Ubiquitous	25.2219	25.733	32.8664	26.2151	16.5429	28.6262	29.0956
chr6	4706393	4955785	+	ENSG00000153046.13	CDYL	0.266338	Ubiquitous	14.6924	10.263	11.8521	13.7681	3.99329	10.7628	14.0363
chr11	47487496	47587121	-	ENSG00000149187.13	CELF1	0.231424	Ubiquitous	25.8025	35.1855	41.2809	36.3354	34.9711	41.0904	46.5505
chr20	3764498	3767337	-	ENSG00000125817.7	CENPB	0.281923	Ubiquitous	15.8555	23.0639	28.8579	31.8695	13.7452	25.6337	30.152
chr16	67862060	67881714	-	ENSG00000102901.8	CENPT	0.254549	Ubiquitous	6.9521	12.9915	15.1819	12.4688	7.57387	13.6101	14.3076
chr18	12991361	13125051	+	ENSG00000101639.14	CEP192	0.221779	Ubiquitous	9.21829	10.4338	11.7226	8.33014	3.79898	11.793	11.5617
chr11	95523129	95565857	+	ENSG00000166037.6	CEP57	0.239835	Ubiquitous	14.5908	10.6689	15.9236	14.7754	19.0599	20.15	16.8854
chr2	65283500	65314138	+	ENSG00000011523.9	CEP68	0.257967	Ubiquitous	7.69595	11.8566	10.3732	11.469	2.12648	10.7597	10.3635
chr1	111682249	111727724	+	ENSG00000134255.9	CEPT1	0.291105	Ubiquitous	13.4749	11.3328	21.4118	12.9675	17.9896	16.8668	18.4407
chr12	50523575	50561288	-	ENSG00000139624.8	CERS5	0.285405	Ubiquitous	10.0639	15.0448	15.1245	9.83814	3.74838	14.1261	12.0262
chr7	56169262	56174269	-	ENSG00000106153.12	CHCHD2	0.25041	Ubiquitous	84.5804	65.8555	81.6895	98.2346	80.0641	99.0191	113.272
chr7	132469629	132766848	-	ENSG00000106554.7	CHCHD3	0.275686	Ubiquitous	25.3913	11.5427	25.7825	30.5641	14.8763	29.9536	25.2817
chr8	57124245	57131357	+	ENSG00000170791.13	CHCHD7	0.282877	Ubiquitous	9.19508	10.9821	14.0784	9.35661	5.54778	13.884	11.6102
chr5	98190908	98262240	-	ENSG00000153922.6	CHD1	0.287716	Ubiquitous	22.1143	9.93953	21.1622	17.6505	12.9887	15.1785	17.5902
chr17	7788124	7816078	+	ENSG00000170004.12	CHD3	0.241308	Ubiquitous	24.1692	23.709	23.2373	25.421	3.48744	26.7244	21.6299
chr14	21853353	21924285	-	ENSG00000100888.8	CHD8	0.218488	Ubiquitous	17.1718	14.4554	16.6327	14.8135	6.50342	17.8394	14.0733
chr16	53088945	53363062	+	ENSG00000177200.11	CHD9	0.231741	Ubiquitous	26.3078	24.164	25.4806	18.4926	9.71475	23.7383	19.6769
chr19	16628700	16653341	-	ENSG00000085872.10	CHERP	0.211712	Ubiquitous	6.99252	9.20497	9.63589	10.3809	8.85724	11.3476	8.59954
chr11	867357	915058	-	ENSG00000177830.13	CHID1	0.2689	Ubiquitous	14.2248	13.7023	19.1896	18.6595	22.1058	25.0704	22.0917
chr18	11851395	11854448	+	ENSG00000255112.2	CHMP1B	0.268159	Ubiquitous	17.6088	12.2152	22.5184	18.7849	8.70129	20.2934	21.2756
chr19	59062933	59066491	-	ENSG00000130724.4	CHMP2A	0.285234	Ubiquitous	34.4747	25.8965	29.4887	43.8212	27.0538	37.8263	33.1911
chr3	87276421	87304698	+	ENSG00000083937.4	CHMP2B	0.261528	Ubiquitous	18.3325	10.9215	13.3074	15.3225	7.45859	16.295	18.4249
chr9	33264940	33281977	+	ENSG00000086065.9	CHMP5	0.253104	Ubiquitous	28.0689	21.3522	25.4753	22.1799	12.1491	20.8719	23.759
chr14	65381079	65411309	+	ENSG00000258289.3	CHURC1	0.277775	Ubiquitous	9.46946	17.7379	26.3016	24.5252	14.1695	24.6468	23.4252
chr2	96931870	96939087	+	ENSG00000144021.2	CIAO1	0.138654	Ubiquitous	15.5578	21.8754	24.1912	18.7209	22.8039	24.6429	24.2072
chr16	57462081	57481440	-	ENSG00000005194.10	CIAPIN1	0.287346	Ubiquitous	7.31377	12.8642	11.0533	8.18398	6.54099	9.92581	11.9885
chr19	42772689	42799949	+	ENSG00000079432.3	CIC	0.188867	Ubiquitous	16.0056	15.8962	14.9252	16.3006	8.91098	17.176	11.5533
chr4	103790135	103810399	+	ENSG00000145354.5	CISD2	0.288324	Ubiquitous	6.42586	8.19123	7.26115	5.55122	9.41633	10.513	8.04534
chr9	130928343	130966662	-	ENSG00000148337.15	CIZ1	0.243716	Ubiquitous	17.703	21.6278	18.3246	20.4564	6.46883	18.3827	16.8051
chr19	45542298	45574214	+	ENSG00000104859.10	CLASRP	0.21713	Ubiquitous	15.3498	16.7322	11.9311	13.545	11.6548	14.5991	11.5148
chr1	109472130	109506111	-	ENSG00000121940.11	CLCC1	0.293435	Ubiquitous	5.90369	8.85717	9.06365	7.91306	5.57507	10.5601	7.4556
chr16	1494935	1525581	-	ENSG00000103249.13	CLCN7	0.29815	Ubiquitous	7.15254	16.0758	16.9291	12.2257	10.5158	18.2897	14.1209
chr16	11038345	11276046	+	ENSG00000038532.10	CLEC16A	0.261297	Ubiquitous	9.03418	11.0625	11.5422	7.35778	4.87053	11.0515	7.7813
chr5	157212751	157286183	-	ENSG00000113282.9	CLINT1	0.273666	Ubiquitous	33.0804	11.1227	23.8895	29.6757	28.0732	25.7053	34.7744
chr4	56294070	56413305	-	ENSG00000134852.10	CLOCK	0.225763	Ubiquitous	12.5523	10.9426	11.1867	10.7662	4.82135	11.0404	9.55356
chr19	6361463	6368919	+	ENSG00000125656.4	CLPP	0.283365	Ubiquitous	9.72749	8.2638	10.5639	12.3451	13.8134	9.97108	8.52369
chr19	45457842	45496599	+	ENSG00000104853.11	CLPTM1	0.272219	Ubiquitous	20.6748	33.6505	24.4975	24.8081	26.8686	29.24	20.8522
chr9	36190853	36304778	+	ENSG00000122705.12	CLTA	0.176701	Ubiquitous	39.8742	32.0282	39.3467	39.6815	25.2845	43.0885	36.6332
chr16	81478775	81745367	+	ENSG00000153815.12	CMIP	0.291386	Ubiquitous	20.4971	22.7269	18.9069	23.2206	7.14985	10.6898	18.756
chr3	32522804	32544900	-	ENSG00000091317.7	CMTM6	0.289817	Ubiquitous	21.4964	5.21595	31.2107	16.8802	29.5225	29.5721	30.3048
chr6	37400995	37450603	+	ENSG00000137200.8	CMTR1	0.203385	Ubiquitous	10.1399	11.97	15.2319	13.9957	8.5511	13.756	14.391
chr3	128888327	128902765	-	ENSG00000169714.12	CNBP	0.240202	Ubiquitous	54.9957	69.192	135.341	125.121	113.791	129.057	124.832
chr2	97481982	97499648	+	ENSG00000168763.11	CNNM3	0.235521	Ubiquitous	3.63003	7.68392	12.3276	10.1279	12.2737	11.0254	11.8041
chr3	32726637	32815367	+	ENSG00000182973.14	CNOT10	0.267872	Ubiquitous	9.88226	8.25044	11.9577	9.05872	5.70551	12.7998	11.372
chr12	70636774	70748773	+	ENSG00000111596.7	CNOT2	0.227266	Ubiquitous	29.6101	25.5071	35.7443	25.6015	21.6829	32.2851	31.0386
chr7	135046547	135194875	-	ENSG00000080802.14	CNOT4	0.242149	Ubiquitous	9.09346	12.2946	10.8885	10.4123	4.89253	11.702	8.91621
chr4	78634541	78740769	-	ENSG00000138767.8	CNOT6L	0.241754	Ubiquitous	15.8113	10.5902	18.9305	14.1265	10.4283	16.2935	18.8742
chr12	56703626	56710120	-	ENSG00000257727.1	CNPY2	0.21935	Ubiquitous	15.468	14.4099	9.47598	11.5866	13.6977	14.6109	8.66962
chr6	42896938	42907025	+	ENSG00000137161.12	CNPY3	0.239697	Ubiquitous	9.98005	10.4038	15.0281	12.4773	13.3873	13.6193	8.68761
chr1	246729746	246831886	+	ENSG00000162852.9	CNST	0.130904	Ubiquitous	10.6814	10.3135	10.5392	8.47201	9.36366	10.7324	11.5258
chr7	43648055	43769316	-	ENSG00000106603.13	COA1	0.278174	Ubiquitous	15.6189	18.2898	18.8399	15.6674	10.9142	22.3667	17.5388
chr11	73583712	73588033	-	ENSG00000181924.6	COA4	0.206583	Ubiquitous	15.6129	12.3898	15.0634	16.5669	19.8751	20.853	19.7628
chr16	70514471	70557468	-	ENSG00000103051.14	COG4	0.259324	Ubiquitous	11.2365	9.75865	14.7965	11.0284	7.73793	15.4512	14.108
chr13	40229764	40365802	+	ENSG00000133103.12	COG6	0.237993	Ubiquitous	9.48064	10.7149	9.50506	7.47909	4.64195	11.3747	10.1838
chr16	23399814	23464501	-	ENSG00000168434.8	COG7	0.298083	Ubiquitous	8.43271	7.45675	9.98204	9.54942	4.15409	12.0517	11.1806
chr10	22604903	22609235	+	ENSG00000148444.11	COMMD3	0.268812	Ubiquitous	12.6413	8.18632	14.2814	13.9322	10.2455	14.2422	16.7601
chr15	75628232	75634268	+	ENSG00000140365.11	COMMD4	0.182302	Ubiquitous	9.3276	9.26332	13.4512	13.2034	13.4656	14.3721	14.8961
chr11	36295051	36310999	-	ENSG00000110442.7	COMMD9	0.292725	Ubiquitous	6.37345	11.4545	11.4494	7.40427	7.23985	9.79762	6.34443
chr1	160259063	160313190	-	ENSG00000122218.10	COPA	0.247161	Ubiquitous	35.6904	37.3456	48.6319	45.484	30.3952	52.2997	55.3121
chr3	139074442	139108574	-	ENSG00000184432.5	COPB2	0.224507	Ubiquitous	47.0102	27.2825	41.1751	38.4177	28.0184	44.4808	48.654
chr19	19010323	19030206	-	ENSG00000105669.8	COPE	0.291659	Ubiquitous	27.4927	28.822	33.9391	35.1144	29.1686	46.2511	42.0323
chr17	17150141	17184607	-	ENSG00000141030.8	COPS3	0.175973	Ubiquitous	15.3305	16.4905	14.6438	17.1345	9.57977	15.0198	17.839
chr8	67955314	67996018	-	ENSG00000121022.9	COPS5	0.187043	Ubiquitous	17.7614	14.5936	13.1309	16.0144	11.5701	14.0066	17.32
chr7	99686577	99689823	+	ENSG00000168090.5	COPS6	0.23825	Ubiquitous	25.1764	25.243	21.9816	31.3926	17.1231	27.1563	26.7994
chr12	6832907	6841041	+	ENSG00000111652.5	COPS7A	0.288228	Ubiquitous	13.9115	24.0139	19.7485	18.355	12.181	20.7781	17.5806
chr2	232646381	232673963	+	ENSG00000144524.13	COPS7B	0.272406	Ubiquitous	9.24202	16.1371	13.2201	12.3169	7.14798	15.7598	12.7606
chr2	198318147	198340032	+	ENSG00000115520.4	COQ10B	0.240212	Ubiquitous	9.1161	7.79032	10.2452	12.3206	8.35065	8.60156	12.3772
chr12	120941077	120972237	-	ENSG00000110871.10	COQ5	0.254385	Ubiquitous	7.80417	7.44795	8.70357	8.2251	12.2765	12.4655	11.3094
chr12	50505762	50514240	+	ENSG00000178449.4	COX14	0.12409	Ubiquitous	14.869	9.4495	13.4808	16.0781	16.3267	16.1841	16.4378
chr10	101471601	101491857	-	ENSG00000014919.8	COX15	0.274728	Ubiquitous	11.6024	12.5103	14.6183	11.5842	10.4853	17.364	17.9621
chr2	42560686	42652228	-	ENSG00000115944.10	COX7A2L	0.19397	Ubiquitous	13.007	19.7653	23.327	23.6567	20.7554	22.4551	25.4264
chr8	145618444	145634753	-	ENSG00000071894.10	CPSF1	0.241783	Ubiquitous	7.40607	7.71429	10.3413	9.38964	7.44118	11.6753	11.8629
chr14	92588281	92630755	+	ENSG00000165934.8	CPSF2	0.189447	Ubiquitous	11.8332	8.18515	12.5574	10.9536	5.80672	12.1768	12.1151
chr1	1246965	1260071	-	ENSG00000127054.14	CPSF3L	0.235488	Ubiquitous	13.6301	22.0481	23.6518	23.0197	15.4137	26.6278	24.3804
chr7	99036545	99054994	+	ENSG00000160917.10	CPSF4	0.295566	Ubiquitous	8.40128	14.612	12.6044	9.80527	6.01955	12.2374	12.6914
chr3	3190676	3221394	-	ENSG00000113851.9	CRBN	0.221214	Ubiquitous	20.8273	19.3032	23.6725	17.3299	13.1844	21.3864	18.5836
chr10	35415719	35501886	+	ENSG00000095794.15	CREM	0.277036	Ubiquitous	6.54652	9.7307	11.9207	13.6979	10.2607	11.9251	9.03487
chr17	1323983	1366456	-	ENSG00000167193.7	CRK	0.270946	Ubiquitous	17.9849	14.9351	27.2627	21.6099	16.2635	21.3834	27.0793
chr22	21271714	21308037	+	ENSG00000099942.8	CRKL	0.241092	Ubiquitous	14.1723	21.6104	21.093	15.8584	11.2563	16.2524	19.7695
chr1	153920145	153931101	-	ENSG00000160741.12	CRTC2	0.245714	Ubiquitous	7.61431	7.59958	10.0292	8.00922	6.25179	10.2458	6.86534
chr11	45868669	45904798	+	ENSG00000121671.7	CRY2	0.289002	Ubiquitous	7.37072	20.0699	24.0031	18.2328	23.254	25.2191	14.6536
chr21	34961647	35016232	-	ENSG00000205758.7	CRYZL1	0.250941	Ubiquitous	11.255	19.0133	16.2584	15.9577	6.0952	17.0787	18.8077
chr5	149432854	149492935	-	ENSG00000182578.9	CSF1R	0.242127	Ubiquitous	11.7786	21.1568	24.4493	24.0131	21.7577	11.883	20.5876
chr5	148871760	148931007	-	ENSG00000113712.12	CSNK1A1	0.221157	Ubiquitous	56.7579	39.9191	66.4625	68.0608	32.1663	59.271	69.0421
chr17	80196899	80231607	-	ENSG00000141551.10	CSNK1D	0.242967	Ubiquitous	24.6729	26.0163	41.842	39.3255	19.2119	41.5622	39.2658
chr22	38686697	38794527	-	ENSG00000213923.6	CSNK1E	0.294316	Ubiquitous	43.8739	34.5429	42.5977	31.2626	12.034	31.1022	34.2273
chr19	1941188	1981337	+	ENSG00000133275.11	CSNK1G2	0.266247	Ubiquitous	14.2582	13.2759	19.2982	15.3403	9.85564	16.3055	15.9252
chr20	459116	524465	-	ENSG00000101266.12	CSNK2A1	0.199598	Ubiquitous	21.08	22.4449	20.5872	20.5329	10.5424	22.8225	24.5731
chr16	58191811	58231824	-	ENSG00000070770.4	CSNK2A2	0.234291	Ubiquitous	20.3813	17.1536	25.3957	22.6773	12.8905	20.9318	22.6398
chr20	54967427	54979518	+	ENSG00000101138.7	CSTF1	0.2495	Ubiquitous	8.59964	6.29819	9.32038	7.352	6.03344	10.3331	8.92607
chr11	33098734	33183917	-	ENSG00000176102.7	CSTF3	0.265424	Ubiquitous	11.7605	9.91257	8.75459	7.80959	6.3076	10.6663	8.3833
chr4	1205236	1243741	-	ENSG00000159692.11	CTBP1	0.239618	Ubiquitous	28.8842	45.0911	56.3876	46.0046	31.7353	53.1559	52.3857
chr16	67596310	67673086	+	ENSG00000102974.10	CTCF	0.163632	Ubiquitous	11.2944	8.74898	10.9396	10.2038	5.33308	10.7924	10.6597
chr17	7146910	7155810	-	ENSG00000175826.7	CTDNEP1	0.238647	Ubiquitous	17.0995	24.6579	31.6179	29.7466	12.6257	30.9958	29.3086
chr15	44719432	44821236	+	ENSG00000137770.9	CTDSPL2	0.232956	Ubiquitous	10.3467	8.53702	11.8478	8.64959	5.09676	11.5039	10.3928
chr3	41236328	41301587	+	ENSG00000168036.12	CTNNB1	0.284902	Ubiquitous	82.9981	75.2493	135.636	98.0098	62.7734	132.529	130.397
chr20	36322408	36500531	+	ENSG00000132792.14	CTNNBL1	0.264582	Ubiquitous	12.2511	7.38926	12.4953	14.2134	9.97909	9.50926	11.093
chr11	10772534	10801290	+	ENSG00000198730.3	CTR9	0.252031	Ubiquitous	13.3122	7.41059	11.4424	9.68732	7.63074	13.1921	10.3794
chr11	70244510	70282690	+	ENSG00000085733.11	CTTN	0.208691	Ubiquitous	59.7894	43.7694	50.3573	57.0104	21.7633	54.7051	60.5316
chr7	148395006	148498128	+	ENSG00000055130.11	CUL1	0.0817066	Ubiquitous	16.8211	14.2749	17.0881	16.9432	12.8898	16.6545	16.5681
chr2	225334867	225450110	-	ENSG00000036257.8	CUL3	0.254767	Ubiquitous	22.7479	15.9097	21.3975	15.8424	11.6066	19.1492	17.8098
chr13	113862552	113919399	+	ENSG00000139842.10	CUL4A	0.226277	Ubiquitous	22.6028	14.6228	29.9495	25.3814	21.376	26.7209	28.3318
chr11	107879459	107978503	+	ENSG00000166266.9	CUL5	0.226095	Ubiquitous	12.2538	10.6433	10.5869	9.57371	5.7553	10.6485	9.69181
chr6	43149913	43192325	+	ENSG00000112659.9	CUL9	0.299422	Ubiquitous	8.599	9.89183	8.30222	6.19412	3.75846	10.6414	7.98517
chr7	101458959	101927249	+	ENSG00000257923.5	CUX1	0.293935	Ubiquitous	11.1247	9.73003	16.7303	16.7364	7.45461	18.6907	17.4049
chr21	18884700	18965897	+	ENSG00000154639.14	CXADR	0.270684	Ubiquitous	13.72	8.46327	11.7615	6.55534	16.6572	16.1504	16.2396
chr16	69458428	69500169	+	ENSG00000103018.12	CYB5B	0.280656	Ubiquitous	11.3649	14.6362	15.5372	11.5326	6.88222	13.8171	17.092
chr1	202930997	202936408	-	ENSG00000159348.8	CYB5R1	0.29992	Ubiquitous	12.909	9.89339	19.3777	15.6108	12.3065	18.851	11.8249
chr16	50775961	50835846	+	ENSG00000083799.13	CYLD	0.232315	Ubiquitous	24.6461	23.0537	28.2045	21.4431	13.4197	29.4114	24.7049
chr1	155657751	155708801	+	ENSG00000132676.11	DAP3	0.248494	Ubiquitous	24.505	14.6779	18.1363	20.7558	16.9753	19.1318	20.8168
chr19	1407568	1435719	+	ENSG00000071626.12	DAZAP1	0.217619	Ubiquitous	24.3586	19.1626	30.0614	29.5138	20.5285	32.5323	29.091
chr9	37800499	37867663	+	ENSG00000122741.11	DCAF10	0.246759	Ubiquitous	8.2117	6.66415	9.67175	9.11232	7.35695	9.68295	11.2181
chr9	34086385	34127397	-	ENSG00000198876.8	DCAF12	0.285806	Ubiquitous	16.0233	6.88052	15.6379	10.0835	8.12133	12.392	15.5473
chr14	69517598	69619867	-	ENSG00000139990.13	DCAF5	0.234504	Ubiquitous	15.2862	11.3686	19.0386	17.2022	10.528	18.1165	14.9421
chr1	167905021	168045081	+	ENSG00000143164.11	DCAF6	0.219602	Ubiquitous	21.1347	22.5304	20.7081	20.5382	26.2919	16.3309	21.8664
chr12	57923885	57941114	-	ENSG00000175203.11	DCTN2	0.278473	Ubiquitous	26.8738	32.1646	28.9784	37.1781	12.2154	25.6754	35.0424
chr9	34613548	34620515	-	ENSG00000137100.11	DCTN3	0.299115	Ubiquitous	12.6754	27.2688	21.1726	22.0809	13.9721	27.896	20.1414
chr5	150088002	150138671	-	ENSG00000132912.8	DCTN4	0.283015	Ubiquitous	19.3662	26.9267	25.262	18.0697	11.6529	22.066	19.4193
chr3	182655862	182703741	-	ENSG00000043093.9	DCUN1D1	0.265319	Ubiquitous	10.2573	8.43212	7.16341	7.23773	6.87279	7.8831	7.62592
chr4	52709166	52783003	+	ENSG00000109184.10	DCUN1D4	0.197977	Ubiquitous	14.4502	21.3473	15.5066	18.2761	16.9421	21.7558	18.1697
chr11	61066923	61110068	-	ENSG00000167986.9	DDB1	0.251023	Ubiquitous	44.0846	39.1926	39.7087	37.7762	25.4121	50.816	42.1863
chr20	3170996	3185331	-	ENSG00000198171.8	DDRGK1	0.263086	Ubiquitous	15.622	19.5395	15.5472	14.0796	16.5401	15.8601	8.74438
chr2	118572226	118589955	+	ENSG00000088205.8	DDX18	0.228037	Ubiquitous	18.1016	12.7809	19.4338	15.9689	12.0004	21.4444	21.0401
chr16	70380732	70407286	+	ENSG00000168872.11	DDX19A	0.236452	Ubiquitous	7.98953	10.242	10.619	11.8944	7.72859	12.6137	9.3133
chr12	49223547	49246625	-	ENSG00000174243.5	DDX23	0.187591	Ubiquitous	17.0692	11.485	19.097	18.0138	9.82016	18.6246	18.0745
chr14	94517266	94547591	-	ENSG00000089737.11	DDX24	0.299764	Ubiquitous	18.0952	28.7804	22.225	21.3408	11.5522	28.287	19.4184
chr5	176938578	176944470	-	ENSG00000183258.7	DDX41	0.29317	Ubiquitous	9.43627	10.4933	9.84735	8.58904	7.13525	12.9003	9.20891
chr17	61850963	61896677	+	ENSG00000198231.8	DDX42	0.139828	Ubiquitous	29.9072	26.4948	32.4553	31.1512	16.5485	32.2867	31.1143
chr19	19030484	19039436	+	ENSG00000105671.7	DDX49	0.230957	Ubiquitous	6.16749	9.35494	9.67914	9.00148	7.64384	11.4011	10.7609
chr11	118620034	118661858	-	ENSG00000110367.7	DDX6	0.21336	Ubiquitous	31.3291	26.9642	29.8718	26.5658	12.454	32.9706	28.4309
chr19	42702750	42724292	-	ENSG00000160570.9	DEDD2	0.298909	Ubiquitous	6.21495	7.1424	12.8824	10.8706	7.19947	12.2116	10.5515
chr16	90014333	90034468	+	ENSG00000140995.12	DEF8	0.230047	Ubiquitous	13.7282	15.4604	13.7476	11.4585	5.63438	14.5794	12.2744
chr15	65950384	66084631	-	ENSG00000174485.10	DENND4A	0.237761	Ubiquitous	13.7833	17.4442	18.1671	13.2947	11.8311	14.8485	11.884
chr12	123237321	123255611	+	ENSG00000139726.6	DENR	0.296872	Ubiquitous	19.3909	11.9027	13.7056	13.9925	8.2545	18.0262	15.9243
chr16	11022748	11036317	-	ENSG00000182108.5	DEXI	0.153567	Ubiquitous	4.76814	11.0083	10.2518	10.2296	10.7906	11.0675	9.159
chr2	74153953	74186088	+	ENSG00000114956.15	DGUOK	0.256829	Ubiquitous	11.8136	12.1529	15.3255	14.2204	8.6823	15.3218	17.3842
chr19	12786531	12792716	-	ENSG00000095059.11	DHPS	0.18587	Ubiquitous	13.1832	21.9745	24.227	19.1014	18.2709	24.5039	22.9391
chr3	47844399	47891685	+	ENSG00000132153.10	DHX30	0.260631	Ubiquitous	11.1366	22.3301	20.339	17.4961	11.2186	19.8541	19.0168
chr3	153990335	154042286	-	ENSG00000174953.9	DHX36	0.224922	Ubiquitous	19.4089	15.8397	19.2551	13.8486	8.70378	18.0027	14.6105
chr16	72127461	72146811	+	ENSG00000140829.7	DHX38	0.245298	Ubiquitous	11.8248	9.58072	15.3606	13.1305	7.41977	13.932	13.6684
chr17	41561233	41621831	+	ENSG00000067596.6	DHX8	0.272289	Ubiquitous	8.62741	7.62083	12.0416	10.1033	4.51755	10.4142	11.2933
chr1	182808504	182856886	+	ENSG00000135829.12	DHX9	0.271019	Ubiquitous	36.1657	28.0759	34.4627	30.7568	17.2725	41.2625	33.7439
chr14	95552565	95624347	-	ENSG00000100697.10	DICER1	0.263224	Ubiquitous	20.4724	20.373	23.2162	16.1389	13.0792	25.8717	21.0901
chr21	47878812	47989926	+	ENSG00000160305.13	DIP2A	0.284324	Ubiquitous	17.0657	14.1187	14.2049	12.3226	6.03506	12.6266	13.9735
chr15	66585555	66626236	+	ENSG00000166938.8	DIS3L	0.257021	Ubiquitous	8.6278	11.7034	10.4985	9.99002	7.70102	13.2719	10.6438
chr14	75348594	75370448	+	ENSG00000119689.10	DLST	0.272348	Ubiquitous	21.5959	14.2516	27.6577	28.7462	24.3628	27.6333	33.0395
chr19	46286205	46296060	-	ENSG00000185800.7	DMWD	0.296026	Ubiquitous	7.70777	20.0357	19.394	17.5254	5.53402	17.7623	16.7041
chr9	33025209	33039905	+	ENSG00000086061.11	DNAJA1	0.275225	Ubiquitous	28.7944	42.5157	36.3371	35.145	34.1855	29.7103	20.7135
chr16	46989299	47007699	-	ENSG00000069345.7	DNAJA2	0.205337	Ubiquitous	23.9128	18.1034	19.0306	20.7912	14.9006	20.6298	20.5603
chr10	74092588	74114988	-	ENSG00000148719.10	DNAJB12	0.256664	Ubiquitous	6.8667	7.39456	11.2249	10.1458	6.59758	10.3223	8.73616
chr4	100817405	100867883	-	ENSG00000164031.12	DNAJB14	0.276207	Ubiquitous	12.4	17.9347	18.5758	12.0205	5.99608	16.5978	15.7211
chr7	157128075	157210133	+	ENSG00000105993.10	DNAJB6	0.230407	Ubiquitous	34.4509	26.2728	37.8678	39.1657	16.2199	28.1043	37.9343
chr10	22045466	22292698	-	ENSG00000136770.6	DNAJC1	0.279539	Ubiquitous	11.4979	3.8516	9.36698	10.4883	8.33443	10.6072	7.05415
chr2	183580999	183659191	+	ENSG00000077232.12	DNAJC10	0.299488	Ubiquitous	7.06501	8.51871	9.48797	10.0473	4.99056	11.8772	9.81098
chr3	132136370	132257876	+	ENSG00000138246.11	DNAJC13	0.297799	Ubiquitous	18.6444	11.4994	18.1677	16.0447	7.1589	18.8295	21.4432
chr13	43597339	43683045	+	ENSG00000120675.4	DNAJC15	0.196514	Ubiquitous	7.85296	9.76773	7.89005	10.194	5.4943	9.03183	10.4194
chr3	180701497	180707562	-	ENSG00000205981.2	DNAJC19	0.188535	Ubiquitous	11.3973	11.9946	11.2455	10.0901	11.1838	13.7304	10.9391
chr5	34929698	34959069	+	ENSG00000168724.10	DNAJC21	0.198323	Ubiquitous	12.0559	8.6417	13.0243	12.61	7.83084	10.6268	10.8825
chr17	40128451	40173394	-	ENSG00000168259.10	DNAJC7	0.298866	Ubiquitous	13.3046	11.1638	10.2048	8.41494	5.67106	11.0123	9.50283
chr1	28525967	28559536	-	ENSG00000126698.6	DNAJC8	0.241244	Ubiquitous	32.5334	24.0065	26.8056	28.3799	14.1538	28.2305	26.5331
chr2	25455845	25565459	-	ENSG00000119772.12	DNMT3A	0.209762	Ubiquitous	7.80112	12.3916	11.0504	12.7228	4.75898	12.9392	12.6255
chr1	62920399	63153969	-	ENSG00000116641.11	DOCK7	0.291811	Ubiquitous	8.91073	12.2213	8.36577	9.32815	5.12702	8.11834	12.2546
chr6	83777385	83881069	+	ENSG00000083097.10	DOPEY1	0.267264	Ubiquitous	13.7342	16.9869	15.6555	10.0244	7.35914	17.8974	14.9245
chr17	1933404	1946724	+	ENSG00000108963.13	DPH1	0.225323	Ubiquitous	8.78326	16.931	14.1688	13.9739	14.261	17.9044	15.1029
chr9	140449356	140473387	-	ENSG00000148399.7	DPH7	0.298385	Ubiquitous	6.69232	11.3092	10.531	8.34767	5.4908	12.6974	11.0814
chr15	65734801	65810042	-	ENSG00000074603.14	DPP8	0.270236	Ubiquitous	14.5972	17.8601	15.549	12.227	5.872	13.8334	16.1232
chr22	31795509	31924726	+	ENSG00000185721.7	DRG1	0.281215	Ubiquitous	15.9149	11.2808	10.8366	12.5391	7.56902	14.3808	12.0299
chr15	49913177	49937333	+	ENSG00000104047.10	DTWD1	0.277519	Ubiquitous	11.2002	11.7883	16.9296	16.4498	6.45093	18.6852	18.1794
chr1	1270656	1284730	-	ENSG00000107404.13	DVL1	0.144282	Ubiquitous	15.1939	18.7708	18.0982	17.6938	14.5665	14.5016	16.3213
chr17	7128660	7137864	-	ENSG00000004975.7	DVL2	0.235935	Ubiquitous	12.0004	10.6435	12.8641	10.841	5.02942	13.561	10.7907
chr18	46570039	46987717	-	ENSG00000141627.9	DYM	0.283527	Ubiquitous	17.4777	17.9982	18.9719	15.6798	8.41911	22.6488	18.8168
chr2	172543919	172604930	+	ENSG00000077380.11	DYNC1I2	0.285909	Ubiquitous	38.7731	41.887	31.2891	33.0833	10.8613	28.4053	37.0548
chr16	67226072	67232821	+	ENSG00000205250.4	E2F4	0.282366	Ubiquitous	9.40534	9.25733	17.0349	15.8849	7.21534	15.0467	16.5393
chr19	11616731	11639989	-	ENSG00000130159.9	ECSIT	0.224163	Ubiquitous	6.31197	11.4761	9.53642	13.5768	13.6739	11.9625	14.2937
chr16	67906926	67918406	+	ENSG00000038358.10	EDC4	0.276305	Ubiquitous	7.54917	10.1611	12.1311	11.0255	5.66803	11.9076	13.4593
chr8	144661867	144681711	-	ENSG00000104529.13	EEF1D	0.279651	Ubiquitous	101.458	41.2328	114.901	134.413	84.8861	140.382	129.855
chr19	3976054	3985467	-	ENSG00000167658.11	EEF2	0.297744	Ubiquitous	465.717	236.624	387.48	573.569	314.726	495.962	516.243
chr8	132916335	133025889	+	ENSG00000132294.9	EFR3A	0.205602	Ubiquitous	14.3736	28.4834	28.7168	29.4949	16.9135	25.9788	26.1182
chr17	42927311	42977030	-	ENSG00000108883.8	EFTUD2	0.218588	Ubiquitous	14.2566	14.256	18.3412	12.9462	9.9076	17.5032	17.1226
chr1	231499497	231560790	-	ENSG00000135766.8	EGLN1	0.250647	Ubiquitous	9.04037	11.7532	9.83133	11.8357	10.7046	9.17045	13.8643
chr9	140513444	140764468	+	ENSG00000181090.13	EHMT1	0.270917	Ubiquitous	21.5315	11.7095	17.0336	17.0688	12.2784	19.9999	16.0994
chr11	65764016	65769647	-	ENSG00000175376.4	EIF1AD	0.26755	Ubiquitous	7.005	7.26349	10.5763	8.76051	4.71297	10.7393	8.87773
chrX	20142636	20159962	-	ENSG00000173674.6	EIF1AX	0.216089	Ubiquitous	18.924	21.8837	19.5961	15.5307	10.4586	20.9375	17.4825
chr3	40351175	40353915	+	ENSG00000114784.3	EIF1B	0.294915	Ubiquitous	15.2388	28.0314	23.612	21.75	15.0613	22.7061	20.219
chr7	6061881	6098861	-	ENSG00000086232.8	EIF2AK1	0.24232	Ubiquitous	13.004	15.8985	15.5479	12.6753	13.6379	17.1149	19.3306
chr15	40226347	40327797	+	ENSG00000128829.7	EIF2AK4	0.196142	Ubiquitous	10.4762	7.74415	11.2703	9.61375	9.38757	12.0943	9.84092
chr12	124104953	124118313	-	ENSG00000111361.8	EIF2B1	0.197871	Ubiquitous	11.5862	9.94853	14.3205	11.6382	7.47851	14.1056	14.1641
chr3	183852826	184402546	+	ENSG00000145191.7	EIF2B5	0.223591	Ubiquitous	12.2872	11.1598	15.0371	11.3066	9.37805	16.0412	15.5585
chr14	67826714	67853233	+	ENSG00000134001.8	EIF2S1	0.267923	Ubiquitous	17.7632	12.0036	14.4912	14.6116	8.71429	13.8394	14.3643
chrX	24072833	24096088	+	ENSG00000130741.6	EIF2S3	0.25628	Ubiquitous	51.2126	22.9308	55.5196	60.3735	30.8096	63.5525	62.7453
chr7	2393721	2420380	+	ENSG00000106263.13	EIF3B	0.23659	Ubiquitous	30.1186	17.4712	31.5632	36.8385	25.4279	31.4427	37.739
chr16	28699879	28747051	+	ENSG00000184110.10	EIF3C	0.275081	Ubiquitous	30.69	23.7086	26.3452	26.1063	19.5122	35.3668	27.4663
chr16	28390900	28415200	-	ENSG00000205609.8	EIF3CL	0.263249	Ubiquitous	28.1368	21.2366	24.4296	25.9676	17.9895	32.4271	25.5839
chr1	32687529	32697205	+	ENSG00000084623.7	EIF3I	0.192997	Ubiquitous	40.2132	19.8436	30.1323	40.1782	30.0308	36.5237	38.0044
chr11	32605344	32627808	+	ENSG00000149100.8	EIF3M	0.267586	Ubiquitous	20.5753	13.068	15.6356	15.5363	10.3412	19.371	16.4659
chr17	7476024	7482323	+	ENSG00000161960.10	EIF4A1	0.191168	Ubiquitous	77.6398	44.8833	85.8338	87.7462	75.9286	67.298	74.2484
chr3	186500994	186507689	+	ENSG00000156976.10	EIF4A2	0.261803	Ubiquitous	90.4805	171.39	153.523	160.081	82.6314	184.985	161.227
chr17	78109013	78120982	-	ENSG00000141543.5	EIF4A3	0.252054	Ubiquitous	20.6377	10.1159	17.2555	15.638	11.5173	18.8245	19.2643
chr12	53399942	53435993	+	ENSG00000063046.13	EIF4B	0.297534	Ubiquitous	115.433	64.3635	116.028	125.233	83.2784	149.103	124.104
chr4	99792835	99851788	-	ENSG00000151247.8	EIF4E	0.175731	Ubiquitous	12.3823	14.7611	12.9878	14.0412	6.7098	14.8789	12.7033
chr3	71724567	71803924	-	ENSG00000163412.8	EIF4E3	0.294932	Ubiquitous	13.7718	16.3027	14.0599	18.2396	2.19505	14.8208	16.0105
chr22	31832963	31892094	-	ENSG00000184708.13	EIF4ENIF1	0.190021	Ubiquitous	7.14016	9.95893	9.1008	10.19	3.37386	9.97572	9.97259
chr3	184032283	184053146	+	ENSG00000114867.15	EIF4G1	0.214523	Ubiquitous	55.6482	30.3148	59.5616	68.5084	66.7279	55.3047	55.3134
chr11	10818597	10830657	-	ENSG00000110321.11	EIF4G2	0.25277	Ubiquitous	141.123	94.7885	175.039	173.031	71.3765	164.299	182.821
chr7	73588575	73611431	+	ENSG00000106682.10	EIF4H	0.163274	Ubiquitous	39.1754	32.4494	41.2018	45.0344	28.5221	41.0275	43.7127
chr14	103799881	103811362	+	ENSG00000100664.6	EIF5	0.194067	Ubiquitous	28.5559	43.4913	55.0008	49.69	59.9333	58.3312	61.0064
chr17	7210318	7215774	+	ENSG00000132507.13	EIF5A	0.251321	Ubiquitous	75.2198	38.8384	62.1341	70.7281	77.2386	61.9041	85.9432
chr17	12895708	12921504	-	ENSG00000006744.14	ELAC2	0.132323	Ubiquitous	12.9003	11.6186	13.451	14.6861	12.0303	15.3562	15.2592
chr19	8023463	8070543	-	ENSG00000066044.9	ELAVL1	0.180949	Ubiquitous	6.60931	9.39643	10.3773	9.22269	5.33796	10.4009	10.448
chr4	139949266	140098372	-	ENSG00000109381.15	ELF2	0.284751	Ubiquitous	23.9397	12.773	21.8901	18.4758	11.0353	18.973	19.5901
chr19	11661962	11670051	-	ENSG00000130165.6	ELOF1	0.202888	Ubiquitous	10.2315	9.70535	10.2467	10.7532	7.72796	11.944	8.45962
chr1	43829068	43833696	-	ENSG00000066322.8	ELOVL1	0.282732	Ubiquitous	22.7306	35.3052	33.6254	21.8155	10.0806	29.1672	34.5206
chr6	53132196	53213947	-	ENSG00000012660.9	ELOVL5	0.240623	Ubiquitous	19.8458	27.9801	31.0028	23.7118	22.8041	29.8671	17.0479
chr18	33709407	33757909	+	ENSG00000134759.9	ELP2	0.153554	Ubiquitous	21.7124	22.6896	26.1619	16.9727	23.3269	25.4068	22.7592
chr17	7154735	7163259	+	ENSG00000170291.10	ELP5	0.188998	Ubiquitous	5.58171	11.1974	10.1222	9.62578	10.1509	11.9282	11.3648
chr1	19542158	19578046	-	ENSG00000127463.9	EMC1	0.222381	Ubiquitous	7.05869	13.2149	12.1231	9.9788	7.60727	12.5294	12.3598
chr15	34517200	34522357	+	ENSG00000128463.8	EMC4	0.185206	Ubiquitous	27.2903	22.7593	23.1118	23.3665	18.7374	24.8516	20.5893
chr15	34376218	34394149	-	ENSG00000134153.5	EMC7	0.249479	Ubiquitous	17.988	18.4916	23.6992	18.9691	19.9261	21.4195	26.7577
chr8	110346553	110358182	+	ENSG00000120533.8	ENY2	0.265366	Ubiquitous	11.747	9.41842	12.0372	8.63226	7.14103	13.1645	9.05044
chr22	41487790	41576081	+	ENSG00000100393.9	EP300	0.265481	Ubiquitous	16.5446	12.0411	20.5738	18.3501	8.712	21.1881	17.1566
chr12	132434508	132565005	+	ENSG00000183495.9	EP400	0.258139	Ubiquitous	6.73672	8.50493	9.30117	8.62598	3.54616	10.0303	7.93169
chr19	56186592	56221224	+	ENSG00000063245.10	EPN1	0.208553	Ubiquitous	23.3415	37.6513	28.0306	39.568	37.0229	25.521	36.3285
chr1	220141943	220220000	-	ENSG00000136628.13	EPRS	0.282206	Ubiquitous	25.4726	19.3392	17.2415	19.3459	9.68572	20.7302	23.362
chr19	16466050	16582896	-	ENSG00000127527.9	EPS15L1	0.180079	Ubiquitous	13.4813	13.5885	11.3901	12.9037	4.99193	13.3392	10.7426
chr17	27181956	27188085	+	ENSG00000132591.7	ERAL1	0.197905	Ubiquitous	8.15324	11.7617	9.82909	10.015	9.513	11.5775	12.6439
chr5	65222303	65378377	+	ENSG00000112851.10	ERBB2IP	0.256536	Ubiquitous	27.7962	44.3583	35.9584	35.0431	20.7298	39.0942	39.251
chr12	1099675	1605099	+	ENSG00000082805.15	ERC1	0.236015	Ubiquitous	12.811	12.2116	13.9915	16.0923	7.4389	16.7419	14.1981
chr2	128014866	128051752	-	ENSG00000163161.8	ERCC3	0.234189	Ubiquitous	11.4079	17.2447	17.7256	13.0385	7.9719	18.2649	16.5362
chr9	98637983	98776842	+	ENSG00000182150.11	ERCC6L2	0.164315	Ubiquitous	15.3331	19.9784	19.9286	18.5293	8.70386	20.2492	19.0586
chr19	42751724	42759309	-	ENSG00000105722.5	ERF	0.16901	Ubiquitous	9.28882	14.3559	15.2806	16.1941	15.9634	14.1114	11.7428
chr5	172261278	172379688	+	ENSG00000113719.11	ERGIC1	0.264451	Ubiquitous	26.9967	20.3234	51.892	52.1198	61.0295	57.6649	60.3444
chr9	102741461	102861322	-	ENSG00000023318.7	ERP44	0.17451	Ubiquitous	9.83281	6.04638	10.9322	9.11675	8.67315	11.1486	11.2559
chr13	47345391	47371367	-	ENSG00000139684.9	ESD	0.227208	Ubiquitous	36.2326	24.8437	40.0665	36.3135	40.7199	47.9679	44.2392
chr7	158523686	158622944	-	ENSG00000117868.11	ESYT2	0.2579	Ubiquitous	31.0061	15.0999	34.9868	29.1504	13.4712	32.1937	35.015
chr12	22778009	22843599	+	ENSG00000139163.11	ETNK1	0.208609	Ubiquitous	16.2735	17.0961	19.3823	21.7363	12.0503	18.9742	19.4352
chr22	29663998	29696515	+	ENSG00000182944.13	EWSR1	0.233947	Ubiquitous	34.8552	39.7472	51.481	54.7503	30.061	52.5012	43.0041
chr14	69658228	69709075	+	ENSG00000081177.14	EXD2	0.291515	Ubiquitous	6.18586	12.1434	11.4787	8.27586	3.60077	11.557	10.5224
chr6	485133	693117	-	ENSG00000112685.9	EXOC2	0.295363	Ubiquitous	8.36727	8.8261	11.188	7.37662	4.37162	9.69601	8.66313
chr5	443273	472052	+	ENSG00000180104.11	EXOC3	0.186399	Ubiquitous	16.1272	18.4065	18.7757	20.5149	10.3888	20.9431	21.5413
chr7	132937829	133751342	+	ENSG00000131558.10	EXOC4	0.166804	Ubiquitous	22.0249	18.0225	22.7289	19.0243	11.0807	22.8782	21.4912
chr17	74077087	74117657	-	ENSG00000182473.16	EXOC7	0.288325	Ubiquitous	28.8742	34.5416	30.5013	28.119	15.5181	39.5635	31.3839
chr1	11126675	11159938	-	ENSG00000171824.9	EXOSC10	0.181026	Ubiquitous	15.3775	13.8679	16.3302	13.486	7.691	14.9394	14.8821
chr9	133569108	133580248	+	ENSG00000130713.11	EXOSC2	0.291943	Ubiquitous	7.3016	8.53851	8.77383	7.34905	5.88047	11.1112	9.36068
chr9	37766975	37801434	-	ENSG00000107371.8	EXOSC3	0.292476	Ubiquitous	7.48779	10.0999	10.6667	9.37868	4.82817	12.119	8.98588
chr16	70284134	70285833	-	ENSG00000223496.1	EXOSC6	0.264573	Ubiquitous	7.37802	13.6311	15.4121	10.863	8.91465	13.7628	13.4571
chr17	40852293	40897071	-	ENSG00000108799.8	EZH1	0.26309	Ubiquitous	13.585	19.027	18.3276	15.6423	5.36432	16.9051	14.3025
chr1	50905150	51425935	-	ENSG00000185104.15	FAF1	0.217749	Ubiquitous	12.2391	10.4425	9.37409	8.71344	5.97044	11.9558	10.988
chr5	175874629	175937075	+	ENSG00000113194.8	FAF2	0.208311	Ubiquitous	10.7179	9.86915	13.4958	11.8438	8.05833	14.2467	13.6888
chr9	130702858	130742792	-	ENSG00000167106.7	FAM102A	0.290526	Ubiquitous	28.0129	31.2788	12.9882	31.904	14.9703	21.6557	26.9046
chr6	170599791	170716153	+	ENSG00000112584.9	FAM120B	0.288017	Ubiquitous	9.39503	12.4102	13.197	10.5326	5.13671	14.6655	11.9781
chr2	201838441	201936394	-	ENSG00000155744.5	FAM126B	0.288744	Ubiquitous	12.0744	14.0142	12.1499	8.94624	6.17687	9.38221	11.0764
chr17	40731531	40762641	-	ENSG00000141699.6	FAM134C	0.281545	Ubiquitous	16.2219	12.759	26.4919	20.8288	19.6725	21.9309	22.7865
chr2	70523107	70529222	-	ENSG00000035141.3	FAM136A	0.25578	Ubiquitous	10.2883	5.56515	6.99613	9.37117	8.87923	11.8487	11.8083
chr5	137273649	137387650	-	ENSG00000031003.6	FAM13B	0.191604	Ubiquitous	15.63	19.9715	18.7795	17.9988	6.12644	18.5334	20.0066
chr10	116581503	116659591	+	ENSG00000151553.10	FAM160B1	0.282925	Ubiquitous	8.3379	6.62325	12.6454	10.1411	8.57613	11.1311	9.59688
chr8	21946670	21962409	+	ENSG00000158863.17	FAM160B2	0.253006	Ubiquitous	10.1857	11.4865	14.4909	14.8713	6.51188	16.0601	14.4343
chr5	92953775	93447404	-	ENSG00000113391.12	FAM172A	0.279648	Ubiquitous	12.4651	10.0117	9.70204	11.3361	3.19273	11.1057	8.52734
chr10	15820169	15902519	-	ENSG00000148481.9	FAM188A	0.219737	Ubiquitous	11.485	16.5879	15.6548	12.2924	7.83469	15.2826	15.1081
chr4	2626988	2734292	+	ENSG00000125386.10	FAM193A	0.205282	Ubiquitous	10.2839	12.4573	13.5859	11.294	6.66831	12.8719	11.2065
chr10	120065401	120101840	-	ENSG00000165669.9	FAM204A	0.2337	Ubiquitous	11.2499	8.9138	12.7523	9.68339	4.96736	12.7431	11.0748
chr3	56654161	56717265	-	ENSG00000163946.9	FAM208A	0.281358	Ubiquitous	17.7951	19.3354	25.5087	18.5516	9.02561	25.2554	20.0264
chr10	5726801	5805703	+	ENSG00000108021.15	FAM208B	0.264455	Ubiquitous	26.5191	17.8609	21.4293	18.1234	11.249	26.2896	22.0839
chr15	75192328	75199462	-	ENSG00000178761.10	FAM219B	0.293211	Ubiquitous	10.225	14.9504	18.566	15.3751	4.59759	16.6849	16.9002
chr19	16296191	16302857	+	ENSG00000105058.7	FAM32A	0.202599	Ubiquitous	19.4124	14.5196	20.2446	22.2216	14.9424	18.4621	22.9501
chr5	137667624	137685416	+	ENSG00000120709.6	FAM53C	0.275666	Ubiquitous	7.59705	13.25	11.1585	11.9482	4.71952	10.982	11.1793
chr11	95502106	95523573	-	ENSG00000077458.8	FAM76B	0.2948	Ubiquitous	6.88642	6.66166	10.2692	6.83288	7.40523	10.9558	8.30066
chr16	66965959	66968326	-	ENSG00000166595.7	FAM96B	0.19998	Ubiquitous	11.2202	16.0834	19.9856	17.4289	16.3903	20.7331	18.4128
chr2	33808725	33824449	-	ENSG00000119812.14	FAM98A	0.254522	Ubiquitous	9.74691	12.6844	7.89021	12.4488	6.21365	12.2403	8.19574
chr2	207630081	207657233	+	ENSG00000118246.9	FASTKD2	0.18785	Ubiquitous	11.7776	9.69266	10.587	9.00101	8.55999	12.7337	12.432
chr16	30669752	30682135	+	ENSG00000156860.11	FBRS	0.203699	Ubiquitous	14.6362	14.5578	18.0135	18.6421	8.67837	18.8547	15.5559
chr12	133066137	133161774	+	ENSG00000112787.8	FBRSL1	0.196612	Ubiquitous	10.7703	12.6841	12.0943	13.8948	8.36852	11.3115	11.7491
chr4	15606162	15683302	-	ENSG00000118564.10	FBXL5	0.287478	Ubiquitous	37.2966	31.4215	42.1702	38.7796	24.85	49.3024	36.2565
chr2	48016455	48132932	-	ENSG00000138081.15	FBXO11	0.266404	Ubiquitous	23.8963	28.0965	30.2549	20.4703	12.7077	24.632	23.3665
chr10	5931535	5979556	+	ENSG00000134452.15	FBXO18	0.270404	Ubiquitous	18.1685	13.0315	25.4971	20.1674	12.7637	22.1335	25.3509
chr1	224301789	224349749	+	ENSG00000143756.7	FBXO28	0.173142	Ubiquitous	9.64304	8.92134	11.4065	9.52076	8.36021	9.36611	10.778
chr11	33762485	33796089	-	ENSG00000110429.9	FBXO3	0.242318	Ubiquitous	11.9457	11.5999	13.2845	11.7607	9.5564	15.9901	14.5453
chr4	175157809	175205415	-	ENSG00000164117.8	FBXO8	0.197888	Ubiquitous	7.90985	4.71113	9.06831	9.49519	7.82545	9.56735	10.0936
chr6	52916789	52965671	+	ENSG00000112146.12	FBXO9	0.241295	Ubiquitous	21.4373	19.1022	23.4129	19.5365	14.434	26.5189	22.7974
chr10	103370423	103455052	-	ENSG00000107829.9	FBXW4	0.279715	Ubiquitous	13.2055	15.4233	22.5028	19.6494	9.18824	21.376	18.408
chr9	139834887	139839148	-	ENSG00000159069.9	FBXW5	0.263712	Ubiquitous	25.0184	20.192	26.7002	41.3557	39.6633	29.8397	41.3718
chr1	155278539	155290457	+	ENSG00000160752.10	FDPS	0.280695	Ubiquitous	29.0281	26.0821	35.8253	24.9721	39.1596	24.9974	28.1009
chr19	4791728	4795571	+	ENSG00000141965.3	FEM1A	0.220521	Ubiquitous	7.7722	9.56266	11.7923	9.86763	6.77072	9.75492	11.4229
chr15	68570141	68588203	+	ENSG00000169018.5	FEM1B	0.224753	Ubiquitous	21.803	20.2426	17.4702	17.8086	9.79368	16.3618	19.7392
chr5	114856608	114880591	-	ENSG00000145780.6	FEM1C	0.243679	Ubiquitous	9.63277	11.3702	10.6297	12.2875	5.89348	6.35349	12.3773
chr4	54243810	55161439	+	ENSG00000145216.11	FIP1L1	0.264005	Ubiquitous	17.5848	14.7943	13.7941	12.9424	7.11658	16.0332	12.9731
chr7	100882739	100895597	-	ENSG00000214253.4	FIS1	0.154251	Ubiquitous	51.1749	44.7105	46.7588	52.6194	54.7036	58.4512	46.6431
chr17	17115526	17140502	-	ENSG00000154803.8	FLCN	0.241698	Ubiquitous	11.485	20.0931	21.6091	14.3651	12.1409	21.7929	19.4606
chr17	80674559	80688204	+	ENSG00000141560.10	FN3KRP	0.163137	Ubiquitous	6.96506	10.547	10.7005	10.1814	6.65468	10.4578	11.0545
chr5	130977407	131132710	-	ENSG00000217128.7	FNIP1	0.20788	Ubiquitous	11.1948	13.2935	15.0842	12.1128	9.30771	12.4565	13.3258
chr8	42889337	42940931	+	ENSG00000168522.8	FNTA	0.214662	Ubiquitous	19.1286	21.8572	26.9217	20.3311	14.6072	26.2801	24.6515
chr1	42642210	42801548	-	ENSG00000198815.4	FOXJ3	0.23652	Ubiquitous	11.7231	22.0445	21.3808	18.3037	9.21559	20.8319	19.5283
chr17	80477589	80602538	+	ENSG00000141568.15	FOXK2	0.237135	Ubiquitous	10.5855	12.6737	13.9463	11.026	5.24205	12.703	11.6045
chr3	180585929	180700541	+	ENSG00000114416.13	FXR1	0.296067	Ubiquitous	38.6928	29.0624	27.3098	26.6377	20.5287	35.5514	24.333
chr19	3506271	3538328	+	ENSG00000105325.9	FZR1	0.2691	Ubiquitous	8.79536	8.91364	8.11916	7.74706	5.89241	10.8493	8.11107
chr5	151150606	151192346	+	ENSG00000145907.10	G3BP1	0.262388	Ubiquitous	24.8813	16.2177	28.9608	21.228	18.0633	23.6037	24.1772
chr17	7143333	7146089	-	ENSG00000170296.5	GABARAP	0.18554	Ubiquitous	40.1101	49.0352	62.5907	67.0502	53.0015	66.602	56.3186
chr15	49447853	49660066	+	ENSG00000156958.10	GALK2	0.256439	Ubiquitous	7.21966	8.56696	13.0858	10.6356	7.84369	13.2324	11.6828
chr7	151722759	151819425	+	ENSG00000178234.8	GALNT11	0.297063	Ubiquitous	13.8699	17.1151	16.6195	12.7453	6.89431	18.4857	10.7215
chr21	34876238	34915797	-	ENSG00000159131.12	GART	0.226279	Ubiquitous	19.3906	12.6145	15.6548	14.7866	11.9252	17.3578	17.6784
chr12	120884241	120899389	+	ENSG00000257218.1	GATC	0.248622	Ubiquitous	5.33448	9.05341	10.1663	8.10923	8.60673	11.4936	10.5463
chr10	104005289	104142656	+	ENSG00000107862.4	GBF1	0.20535	Ubiquitous	12.2225	13.0311	15.6013	15.204	7.96374	16.9747	16.9108
chr2	109065017	109125871	+	ENSG00000135968.15	GCC2	0.234476	Ubiquitous	19.209	14.6827	16.8928	14.64	8.79557	16.6824	16.5362
chr10	5807186	5884095	-	ENSG00000057608.12	GDI2	0.23877	Ubiquitous	86.3196	43.854	68.2045	64.0565	69.1483	64.5874	84.4034
chr7	916189	936073	+	ENSG00000239857.2	GET4	0.207783	Ubiquitous	8.17062	11.3849	11.597	12.1936	14.4353	11.8936	13.3756
chr3	158362067	158410364	+	ENSG00000168827.10	GFM1	0.154415	Ubiquitous	14.311	15.7023	15.1143	14.3564	14.8211	15.7452	17.7491
chr5	74017029	74063196	-	ENSG00000164347.13	GFM2	0.122297	Ubiquitous	9.73833	9.92848	8.38213	7.27558	10.2527	9.58238	9.08593
chr17	34900737	34946278	+	ENSG00000005955.8	GGNBP2	0.238401	Ubiquitous	11.9646	7.75411	10.7727	9.26813	6.22984	9.76386	10.8845
chr1	235490665	235507847	+	ENSG00000152904.7	GGPS1	0.218149	Ubiquitous	9.00724	8.86013	9.41598	8.95948	3.34804	10.4123	9.25455
chr10	85899196	85913001	+	ENSG00000165678.15	GHITM	0.263827	Ubiquitous	59.7812	55.5297	40.2178	53.4663	61.9572	40.7297	70.5636
chr7	100277130	100287071	-	ENSG00000146830.9	GIGYF1	0.291863	Ubiquitous	8.6955	10.1618	13.1479	10.8791	6.44804	14.2894	11.3807
chr2	233562009	233725285	+	ENSG00000204120.10	GIGYF2	0.201532	Ubiquitous	24.9758	21.4425	24.0861	20.4367	13.7281	26.5616	22.5822
chr6	38643701	38670917	-	ENSG00000124767.6	GLO1	0.246538	Ubiquitous	35.0429	27.4309	30.8366	26.1596	27.1306	21.809	25.0543
chr17	660337	685581	-	ENSG00000167699.9	GLOD4	0.228352	Ubiquitous	10.1124	12.3656	14.0761	14.0089	12.9699	15.8379	17.1431
chr16	4853204	4897343	-	ENSG00000140632.12	GLYR1	0.259624	Ubiquitous	20.9689	24.8693	27.0122	34.1292	17.9955	28.8014	34.6168
chr5	180663909	180675096	-	ENSG00000204628.7	GNB2L1	0.234264	Ubiquitous	191.208	61.0446	199.449	195.09	141.295	189.328	138.387
chr3	37284668	37408242	+	ENSG00000144674.12	GOLGA4	0.216678	Ubiquitous	19.8129	17.8022	19.1947	23.3159	18.8204	25.2644	19.7949
chr12	21654715	21671342	+	ENSG00000111711.5	GOLT1B	0.230654	Ubiquitous	8.61832	12.3727	11.8592	8.94833	5.75086	10.5711	11.3655
chr1	155719508	155829191	-	ENSG00000116580.14	GON4L	0.222468	Ubiquitous	12.3566	12.5641	15.8039	12.2289	7.86128	15.4264	13.2911
chr2	171784974	171823639	+	ENSG00000115806.8	GORASP2	0.190731	Ubiquitous	14.6127	11.7581	16.9615	17.0279	11.8044	18.0616	18.5818
chr17	28804380	28854610	+	ENSG00000108587.10	GOSR1	0.183173	Ubiquitous	13.0082	12.1611	14.3734	14.6288	9.33736	16.1597	15.6893
chr17	45000483	45105003	+	ENSG00000108433.11	GOSR2	0.249951	Ubiquitous	17.2553	20.0789	30.5134	27.7629	17.7888	31.9352	30.3183
chr17	42472652	42580798	-	ENSG00000186566.7	GPATCH8	0.275893	Ubiquitous	17.3987	15.1704	15.2274	12.149	6.28463	15.987	10.7727
chr17	80008567	80015346	+	ENSG00000169727.8	GPS1	0.236881	Ubiquitous	11.8927	19.9449	20.0635	19.2332	20.6667	24.2563	19.2615
chr17	7214643	7218883	-	ENSG00000132522.11	GPS2	0.264441	Ubiquitous	9.74465	13.148	14.5244	14.9352	7.06663	15.8357	10.4696
chr7	50657760	50861159	-	ENSG00000106070.13	GRB10	0.286966	Ubiquitous	9.23849	23.4561	19.8786	17.3725	19.8589	18.2718	15.7297
chr16	11961985	12009939	-	ENSG00000103342.8	GSPT1	0.22708	Ubiquitous	20.7173	17.9382	24.0879	18.9826	14.147	20.9328	25.1871
chr15	59930261	59949740	-	ENSG00000140307.6	GTF2A2	0.225839	Ubiquitous	10.395	9.72733	10.0588	11.2422	6.80401	11.4823	12.8547
chr19	6379580	6393992	-	ENSG00000125651.9	GTF2F1	0.276345	Ubiquitous	12.8485	11.6235	10.5269	12.3978	5.70606	14.6382	10.4554
chr11	18343842	18388591	+	ENSG00000110768.7	GTF2H1	0.251211	Ubiquitous	18.484	15.4716	18.3135	13.9527	9.65908	20.2883	15.2692
chr13	27998681	28009958	+	ENSG00000122034.8	GTF3A	0.275676	Ubiquitous	23.207	13.5339	15.8077	21.1287	22.3835	12.792	15.2105
chr2	197627756	197664449	-	ENSG00000119041.6	GTF3C3	0.287495	Ubiquitous	12.8061	8.52665	11.2415	8.28967	5.92345	11.0528	9.71233
chr9	135906076	135933890	+	ENSG00000148308.13	GTF3C5	0.187839	Ubiquitous	9.16389	10.4649	10.9476	10.6218	6.27534	11.779	9.92523
chr22	39101728	39134304	+	ENSG00000100226.11	GTPBP1	0.28128	Ubiquitous	15.4821	11.3485	20.2691	17.4738	7.78258	19.1936	16.1265
chr1	228327663	228336685	+	ENSG00000143774.12	GUK1	0.268249	Ubiquitous	32.2303	70.2448	69.7653	62.9005	47.2702	50.8949	45.3488
chr19	49471382	49496567	-	ENSG00000104812.10	GYS1	0.269406	Ubiquitous	10.6184	6.56719	9.49262	11.5178	3.90628	9.75397	11.8297
chr3	129033615	129035120	-	ENSG00000184897.4	H1FX	0.280179	Ubiquitous	43.3569	24.8023	41.0144	36.2719	26.3189	31.0689	27.7789
chr7	44866390	44887682	-	ENSG00000105968.14	H2AFV	0.24304	Ubiquitous	23.8155	49.1808	49.0229	45.2454	22.1593	48.1441	52.3075
chr5	140052758	140071609	-	ENSG00000170445.8	HARS	0.297758	Ubiquitous	12.0616	14.5286	10.1681	11.189	6.23735	11.649	9.91038
chr1	154244987	154248351	+	ENSG00000143575.10	HAX1	0.212408	Ubiquitous	17.7114	18.8508	23.5337	28.4775	23.5353	28.868	24.3084
chr12	104458235	104498639	+	ENSG00000111727.7	HCFC2	0.268866	Ubiquitous	8.67853	8.65222	10.0784	11.7041	4.9158	8.27745	10.7413
chr6	114254192	114332472	-	ENSG00000196591.7	HDAC2	0.279495	Ubiquitous	14.7935	10.6859	13.6894	12.7206	5.81556	14.3717	16.6727
chr1	156711899	156736717	-	ENSG00000143321.14	HDGF	0.282096	Ubiquitous	48.5768	21.6867	36.3463	43.7484	54.8406	44.0068	41.8567
chr19	4472284	4502223	+	ENSG00000167674.10	HDGFRP2	0.189916	Ubiquitous	8.48255	9.39874	8.99663	10.2238	4.81285	10.0617	7.94018
chr2	242166679	242256476	-	ENSG00000115677.12	HDLBP	0.166475	Ubiquitous	78.2141	40.4336	77.8371	91.6164	89.2558	88.4038	84.0429
chr1	236712305	236767804	-	ENSG00000119285.6	HEATR1	0.259377	Ubiquitous	9.6538	6.82577	10.8954	7.37744	5.07363	11.3664	10.6831
chr17	65066554	65242105	-	ENSG00000198265.7	HELZ	0.252009	Ubiquitous	13.7205	12.4838	18.5673	12.6994	13.9676	16.5004	13.9573
chr15	63900817	64126141	-	ENSG00000103657.9	HERC1	0.280918	Ubiquitous	23.2921	29.0575	26.6416	18.108	11.0498	26.4875	19.7893
chr15	28356186	28567298	-	ENSG00000128731.11	HERC2	0.274925	Ubiquitous	10.2188	16.3675	12.7758	12.83	5.32582	14.563	15.4927
chr10	69681665	69835105	-	ENSG00000148634.11	HERC4	0.264505	Ubiquitous	24.8363	22.491	29.7927	19.3843	14.7738	24.3174	25.6717
chr7	35672269	35735181	-	ENSG00000122557.5	HERPUD2	0.283825	Ubiquitous	12.2973	8.39445	14.5968	11.4823	8.31826	11.3426	10.8884
chr17	43224684	43229468	+	ENSG00000186834.2	HEXIM1	0.292866	Ubiquitous	8.07812	8.33104	11.4162	13.2077	6.64377	9.26178	12.3067
chr17	79650356	79670168	+	ENSG00000185359.8	HGS	0.138352	Ubiquitous	18.4335	20.84	21.2087	20.4286	11.7124	20.4426	17.7898
chr1	100503653	100548933	+	ENSG00000156875.9	HIAT1	0.285024	Ubiquitous	16.6347	13.7421	20.5853	15.4772	8.17005	16.3958	17.8883
chr9	99660348	99775862	-	ENSG00000196312.7	HIATL2	0.273391	Ubiquitous	11.5261	12.048	14.2556	9.4662	4.10743	14.104	10.8975
chr2	191054461	191208919	-	ENSG00000198130.10	HIBCH	0.259522	Ubiquitous	21.8151	15.3214	13.0584	12.9864	20.5135	18.7798	16.2623
chr6	126277927	126301387	+	ENSG00000111911.5	HINT3	0.258432	Ubiquitous	11.3231	12.6881	11.0987	9.87366	6.26698	7.93098	9.96119
chr20	30102231	30157370	+	ENSG00000101294.12	HM13	0.259831	Ubiquitous	47.1958	23.8111	36.0301	42.6159	30.1608	48.1439	33.994
chr3	128997671	129025029	+	ENSG00000183624.9	HMCES	0.150334	Ubiquitous	11.0362	9.09531	12.4402	10.408	9.56033	11.0383	12.2818
chr15	77712754	77777949	+	ENSG00000140382.10	HMG20A	0.241563	Ubiquitous	8.55212	13.4071	13.8337	9.22298	7.9308	12.7022	11.1369
chr5	137087075	137090039	-	ENSG00000177733.4	HNRNPA0	0.224999	Ubiquitous	23.5055	20.2147	26.4336	25.566	12.4278	27.8514	21.3615
chr12	54673977	54680872	+	ENSG00000135486.13	HNRNPA1	0.266749	Ubiquitous	145.471	72.4869	110.096	140.77	64.3313	139.025	113.29
chr7	26229547	26241149	-	ENSG00000122566.16	HNRNPA2B1	0.233716	Ubiquitous	120.625	115.576	116.856	122.943	89.291	140.931	82.6694
chr14	21677295	21737653	-	ENSG00000092199.13	HNRNPC	0.17594	Ubiquitous	113.521	85.2871	104.597	103.062	69.891	103.612	94.8384
chr4	83343717	83351294	-	ENSG00000152795.13	HNRNPDL	0.220307	Ubiquitous	54.9603	67.1565	65.9925	54.7298	36.3806	72.0869	58.0142
chrX	100663283	100669121	+	ENSG00000126945.8	HNRNPH2	0.264195	Ubiquitous	0.37058	11.7408	12.4598	12.1106	7.07989	12.3704	11.3354
chr10	70090931	70102948	+	ENSG00000096746.13	HNRNPH3	0.253835	Ubiquitous	32.2313	39.7684	33.0753	31.4192	15.9692	38.7607	26.5872
chr9	86582998	86595569	-	ENSG00000165119.14	HNRNPK	0.228545	Ubiquitous	140.255	98.5408	139.91	130.842	95.776	160.119	135.822
chr19	39327028	39342987	-	ENSG00000104824.12	HNRNPL	0.270807	Ubiquitous	56.3083	45.2817	76.2937	70.6475	44.7258	86.8375	86.6708
chr1	23630264	23670829	-	ENSG00000125944.14	HNRNPR	0.220902	Ubiquitous	40.2948	27.0305	33.1866	38.0182	16.5364	40.5293	34.3911
chr1	245014468	245027844	-	ENSG00000153187.12	HNRNPU	0.229962	Ubiquitous	80.3755	69.1124	85.0497	73.8576	42.8112	89.4444	62.0472
chr19	41768401	41813503	+	ENSG00000105323.12	HNRNPUL1	0.297497	Ubiquitous	48.0939	27.6105	52.8824	58.2729	22.4887	51.8	42.7457
chr11	43577986	43878167	+	ENSG00000149084.7	HSD17B12	0.278859	Ubiquitous	26.7835	33.7871	42.2835	22.1827	30.1461	35.4279	34.6267
chr8	145515280	145538385	+	ENSG00000185122.6	HSF1	0.232163	Ubiquitous	7.00012	7.50823	12.9662	13.1271	8.66043	12.3861	11.9556
chr6	44214824	44221620	+	ENSG00000096384.15	HSP90AB1	0.284837	Ubiquitous	162.519	206.407	182.778	186.315	95.7594	230.612	155.774
chr10	14880163	14913740	+	ENSG00000187522.9	HSPA14	0.282689	Ubiquitous	12.1389	9.92814	11.3676	10.448	5.26483	11.6561	14.1277
chr11	122928197	122933938	-	ENSG00000109971.9	HSPA8	0.225749	Ubiquitous	178.317	233.69	208.305	230.117	200.245	267.975	194.205
chr19	55773599	55791749	-	ENSG00000133265.6	HSPBP1	0.222261	Ubiquitous	6.40483	10.5743	8.47512	8.41113	6.1107	10.1065	9.83617
chr7	47735328	48019178	-	ENSG00000136273.7	HUS1	0.252515	Ubiquitous	7.24769	7.6201	11.1346	6.90865	6.85602	11.1626	10.2963
chrX	53559057	53713673	-	ENSG00000086758.11	HUWE1	0.182233	Ubiquitous	22.9509	22.3753	21.6088	19.7483	11.0854	24.0524	20.2467
chr2	9613787	9636672	+	ENSG00000134330.14	IAH1	0.11291	Ubiquitous	12.5599	10.3691	11.9815	11.1222	9.3027	12.3407	11.7344
chr9	94972489	95056038	-	ENSG00000196305.13	IARS	0.218156	Ubiquitous	29.6808	27.0757	24.0347	24.9651	13.1371	31.8966	30.7355
chr1	220267444	220321380	+	ENSG00000067704.8	IARS2	0.283926	Ubiquitous	22.6285	12.6608	19.9455	19.4267	22.7233	18.6428	27.0055
chr6	82879700	82957471	-	ENSG00000005700.10	IBTK	0.162204	Ubiquitous	18.6355	13.5043	14.656	16.2777	17.7392	14.3385	17.1607
chr21	34696734	34732168	+	ENSG00000142166.8	IFNAR1	0.264648	Ubiquitous	11.3412	14.6871	21.0371	13.4638	20.499	22.175	16.8105
chr7	112063023	112121072	+	ENSG00000006652.9	IFRD1	0.251383	Ubiquitous	25.4705	16.1869	25.2318	19.4942	14.0992	19.8782	19.5156
chr9	111629797	111696396	-	ENSG00000070061.10	IKBKAP	0.270594	Ubiquitous	5.88986	10.4046	9.16137	6.71255	6.10722	10.5243	7.78344
chr2	239079042	239112370	-	ENSG00000132323.4	ILKAP	0.268374	Ubiquitous	13.4102	15.3934	15.7273	14.048	8.58941	19.0775	16.5771
chr2	86371055	86422893	-	ENSG00000132305.16	IMMT	0.287525	Ubiquitous	18.2354	15.7815	17.3002	21.16	14.063	17.6334	24.3689
chr15	75931426	75941047	-	ENSG00000177971.7	IMP3	0.201641	Ubiquitous	11.1006	7.24322	13.4281	9.43209	12.6002	12.9519	10.9944
chr2	131099798	131105383	+	ENSG00000136718.5	IMP4	0.187489	Ubiquitous	8.28311	12.3893	10.0818	11.9043	11.2671	12.0673	13.5368
chr8	57870492	57906403	-	ENSG00000104331.4	IMPAD1	0.178557	Ubiquitous	13.1507	18.8454	17.3192	15.3584	13.3145	15.7906	17.9492
chr11	71934745	71950149	+	ENSG00000165458.9	INPPL1	0.278476	Ubiquitous	18.5961	12.716	27.5906	25.3997	10.1278	28.3103	28.1291
chr7	1509913	1545489	-	ENSG00000164880.11	INTS1	0.2719	Ubiquitous	10.4385	16.9212	18.1265	15.1963	10.306	19.9516	16.1718
chr11	77589766	77705724	-	ENSG00000149262.12	INTS4	0.242497	Ubiquitous	11.7001	7.04437	12.1945	8.06291	5.9392	12.2551	10.7586
chr13	51928213	52028400	-	ENSG00000102786.10	INTS6	0.143882	Ubiquitous	20.6043	14.8012	19.2735	17.1444	18.9691	18.9719	16.6783
chr8	95825539	95893974	+	ENSG00000164941.9	INTS8	0.292757	Ubiquitous	13.8397	12.455	12.6529	10.2558	5.25559	16.5656	16.7374
chr9	102861538	103063282	+	ENSG00000119509.8	INVS	0.206093	Ubiquitous	7.3321	7.87465	10.2724	8.26927	6.95577	10.3682	8.68415
chr3	49761727	49823975	-	ENSG00000176095.7	IP6K1	0.276605	Ubiquitous	9.87068	18.1136	17.7067	13.9157	5.87461	15.2434	16.0086
chr5	61699799	61924409	+	ENSG00000086200.12	IPO11	0.195632	Ubiquitous	10.2518	9.13048	9.76146	8.00569	4.54179	9.85996	8.17795
chr13	98605912	98676551	+	ENSG00000065150.14	IPO5	0.176399	Ubiquitous	24.2392	25.9828	24.7411	22.8437	17.3961	27.5479	28.8875
chr11	9406169	9469673	+	ENSG00000205339.5	IPO7	0.207375	Ubiquitous	32.3433	24.0907	30.154	30.9033	16.3878	35.1745	33.4019
chr12	30781922	30848920	-	ENSG00000133704.5	IPO8	0.292516	Ubiquitous	16.5192	12.8902	21.1413	17.1532	11.9479	20.199	23.5225
chr15	78729773	78793798	+	ENSG00000136381.8	IREB2	0.240415	Ubiquitous	14.4509	13.5707	18.8545	14.0924	10.9733	19.5392	17.1081
chr1	234740015	234745271	-	ENSG00000168264.6	IRF2BP2	0.299951	Ubiquitous	34.3277	22.921	62.3756	53.5846	31.1618	61.2725	58.7282
chr12	108956358	108963160	+	ENSG00000136003.11	ISCU	0.286319	Ubiquitous	30.981	38.3583	39.487	46.4771	22.3998	49.9299	36.1011
chr1	156691683	156698591	-	ENSG00000143319.12	ISG20L2	0.263894	Ubiquitous	6.32328	6.4124	9.45416	8.76518	4.85156	9.3661	10.2279
chr2	128193783	128284462	-	ENSG00000163166.9	IWS1	0.223276	Ubiquitous	11.5736	11.0118	9.19476	10.2086	7.22143	9.64526	6.65533
chr12	49047184	49076021	-	ENSG00000139620.8	KANSL2	0.269852	Ubiquitous	11.4771	8.39495	13.1207	9.01313	5.93065	11.9242	10.7405
chr16	75661622	75682541	-	ENSG00000065427.10	KARS	0.26114	Ubiquitous	27.0279	16.202	28.759	29.2199	17.7917	31.5775	33.9663
chr11	65479467	65487075	+	ENSG00000172977.8	KAT5	0.291441	Ubiquitous	15.0341	14.0313	17.6037	16.6242	6.80733	20.1061	15.3775
chr2	85198216	85286595	+	ENSG00000176407.13	KCMF1	0.266055	Ubiquitous	9.76667	7.0096	9.29171	9.41772	5.93262	9.51666	11.5665
chr19	34286838	34306668	+	ENSG00000153885.10	KCTD15	0.268433	Ubiquitous	9.74576	8.00328	11.0879	11.5491	2.3183	10.7582	8.78027
chr6	36410544	36458920	+	ENSG00000112078.9	KCTD20	0.263855	Ubiquitous	19.3948	11.3247	20.7725	17.4906	13.372	12.7984	17.3689
chr1	215740735	215795149	+	ENSG00000136636.8	KCTD3	0.204593	Ubiquitous	18.1095	15.6806	15.7054	17.3171	20.3387	14.7527	21.3526
chr1	23345941	23410182	+	ENSG00000004487.11	KDM1A	0.233744	Ubiquitous	15.1012	13.359	13.9828	14.6645	7.29011	17.4661	15.9033
chr2	86667770	86719839	+	ENSG00000115548.12	KDM3A	0.277981	Ubiquitous	17.6068	15.1522	22.4544	14.4261	9.05002	21.0172	20.0227
chr5	137688285	137772717	+	ENSG00000120733.9	KDM3B	0.272642	Ubiquitous	17.7722	17.6439	25.5138	21.5514	8.85032	26.2064	26.9326
chr1	44115829	44171186	+	ENSG00000066135.8	KDM4A	0.294943	Ubiquitous	10.5291	8.65274	15.1649	10.1934	7.09805	15.6287	15.901
chr9	6720863	7175648	+	ENSG00000107077.13	KDM4C	0.2081	Ubiquitous	15.9872	12.2204	16.1037	12.7624	8.71634	17.2799	16.3138
chr12	389295	498620	-	ENSG00000073614.7	KDM5A	0.294961	Ubiquitous	18.369	12.7614	21.2723	14.8677	8.34462	18.8003	16.844
chr18	60994959	61034743	-	ENSG00000119537.11	KDSR	0.277593	Ubiquitous	11.818	11.0963	17.4214	12.3113	13.1717	14.618	12.4968
chr19	10596796	10614417	-	ENSG00000079999.9	KEAP1	0.20811	Ubiquitous	12.7507	10.4696	13.7095	13.5319	11.4916	16.0673	14.3878
chr1	32479430	32526451	+	ENSG00000121774.13	KHDRBS1	0.275965	Ubiquitous	25.271	26.6986	45.2177	39.3749	20.2561	45.9841	42.9465
chr19	6413359	6424805	-	ENSG00000088247.11	KHSRP	0.255982	Ubiquitous	35.2694	41.6137	48.3113	57.3242	30.9035	49.6584	50.1449
chr17	26941458	26972472	-	ENSG00000007202.10	KIAA0100	0.281526	Ubiquitous	24.0375	27.8544	39.4103	29.6178	13.1028	36.278	39.0012
chr8	126036502	126104082	-	ENSG00000164961.11	KIAA0196	0.164259	Ubiquitous	12.8522	12.1917	13.9675	11.1476	6.73817	13.7243	13.3855
chr4	6783102	6885897	+	ENSG00000170871.7	KIAA0232	0.261017	Ubiquitous	12.8753	16.3791	13.2924	13.7326	6.98571	11.8724	13.8651
chr1	35899091	36023551	-	ENSG00000142687.13	KIAA0319L	0.296719	Ubiquitous	15.2173	20.4695	27.9175	16.901	17.5036	27.0754	20.6361
chr9	114122972	114247025	-	ENSG00000136813.10	KIAA0368	0.178221	Ubiquitous	23.9724	24.8839	26.0719	23.0669	13.0955	27.2669	28.0605
chr16	15688243	15737023	-	ENSG00000166783.15	KIAA0430	0.22323	Ubiquitous	20.1065	21.8231	24.3202	20.2668	9.16385	25.4547	22.9543
chr1	155882834	155904191	-	ENSG00000132680.6	KIAA0907	0.240914	Ubiquitous	13.5509	10.1125	15.1559	13.2421	7.3887	15.2744	16.4067
chr5	5420777	5490347	+	ENSG00000164151.7	KIAA0947	0.21171	Ubiquitous	10.5203	11.6387	13.4927	11.2328	5.65868	13.6643	12.0853
chr4	123073488	123283913	+	ENSG00000138688.11	KIAA1109	0.259545	Ubiquitous	33.8573	34.236	36.7511	18.7216	13.6098	32.5335	30.317
chr5	175773064	175788971	-	ENSG00000122203.10	KIAA1191	0.149006	Ubiquitous	23.9672	29.2166	31.6039	27.7633	22.4414	30.55	27.43
chr8	95499921	95565757	-	ENSG00000164944.7	KIAA1429	0.170325	Ubiquitous	13.5279	8.94298	13.9807	13.0997	6.89031	13.9795	14.1463
chr7	129710350	129775560	+	ENSG00000128607.9	KLHDC10	0.214605	Ubiquitous	9.74469	11.2454	12.3382	8.04276	11.0596	13.5041	11.2055
chr16	87730091	87799598	-	ENSG00000104731.9	KLHDC4	0.257408	Ubiquitous	7.79734	7.4985	9.1624	7.09724	5.95506	10.5403	9.45214
chr1	202860228	202897764	-	ENSG00000117153.11	KLHL12	0.298087	Ubiquitous	8.15524	9.44086	9.90813	8.13508	4.9228	11.6217	12.3909
chr1	6650784	6674667	-	ENSG00000162413.12	KLHL21	0.299536	Ubiquitous	13.0669	9.4973	12.797	14.7197	7.72256	10.3999	16.2281
chr11	118307205	118397539	+	ENSG00000118058.16	KMT2A	0.238585	Ubiquitous	10.9001	13.1845	13.5424	10.5712	4.76696	13.8341	10.236
chr7	151832010	152133090	-	ENSG00000055609.13	KMT2C	0.258397	Ubiquitous	29.3064	22.4418	25.7308	19.7571	11.2154	29.0555	22.2017
chr7	104654626	104754808	+	ENSG00000005483.15	KMT2E	0.29415	Ubiquitous	44.7727	29.4415	42.0106	33.7363	14.4244	35.8206	34.1835
chr3	122140796	122233792	-	ENSG00000114030.8	KPNA1	0.104401	Ubiquitous	14.4885	14.0643	12.5537	13.9914	11.683	11.6685	13.8942
chr13	50273447	50367057	-	ENSG00000102753.5	KPNA3	0.228386	Ubiquitous	12.077	11.4676	14.0075	12.1723	6.83724	10.7895	14.5477
chr3	160212783	160283376	-	ENSG00000186432.4	KPNA4	0.250109	Ubiquitous	17.9111	11.3803	15.5398	17.1064	6.47709	12.2832	17.8012
chr1	32573639	32642169	+	ENSG00000025800.9	KPNA6	0.162771	Ubiquitous	14.0944	14.068	17.7814	17.9264	8.84932	18.043	17.9173
chr17	45726842	45762871	+	ENSG00000108424.5	KPNB1	0.192451	Ubiquitous	29.0306	23.5567	29.9901	32.6407	16.4582	26.6549	32.4635
chr7	91828283	91875480	-	ENSG00000001631.10	KRIT1	0.195548	Ubiquitous	14.5093	13.175	14.8869	10.9587	7.50365	15.1157	11.9254
chr12	75890684	75905416	-	ENSG00000111615.8	KRR1	0.230076	Ubiquitous	12.8329	9.95228	11.5723	8.82375	7.15512	12.3251	9.45344
chr19	18668572	18680197	+	ENSG00000105700.6	KXD1	0.247353	Ubiquitous	10.6733	16.0736	20.2805	21.1209	11.3678	19.2688	17.7155
chr1	110943871	110950564	-	ENSG00000134248.9	LAMTOR5	0.208695	Ubiquitous	11.217	19.5548	24.4375	25.1855	17.6487	26.0702	25.7334
chr5	145492601	145562223	-	ENSG00000133706.13	LARS	0.201619	Ubiquitous	25.6923	22.3346	20.0187	21.3089	9.58744	25.8	24.6474
chrX	64732462	64754655	-	ENSG00000001497.12	LAS1L	0.297326	Ubiquitous	6.60233	10.6458	8.13348	7.70538	5.43749	9.72264	7.28178
chr10	103867317	103880210	-	ENSG00000198728.6	LDB1	0.239378	Ubiquitous	23.3897	17.929	24.7429	22.0944	6.76893	24.4959	18.2422
chr11	18415935	18429972	+	ENSG00000134333.9	LDHA	0.283311	Ubiquitous	132.561	45.6357	80.724	119.832	139.495	81.8754	139.218
chr12	65563351	65642107	+	ENSG00000174106.2	LEMD3	0.276063	Ubiquitous	9.46513	8.99078	12.986	8.92497	6.11313	11.5972	11.3152
chr14	93170152	93215047	-	ENSG00000100600.10	LGMN	0.277883	Ubiquitous	32.8887	17.2938	71.379	74.0592	60.619	68.7909	69.905
chr11	27516123	27528320	-	ENSG00000148943.7	LIN7C	0.231421	Ubiquitous	18.5076	16.797	18.5759	16.3994	15.9765	23.0815	20.1832
chr7	112756773	112758668	-	ENSG00000214194.4	LINC00998	0.271028	Ubiquitous	14.8604	9.46389	15.6037	13.9106	8.01419	17.1773	13.278
chr7	156461646	156685924	-	ENSG00000105983.15	LMBR1	0.234168	Ubiquitous	13.0983	16.7868	16.6948	10.9879	9.40522	15.0569	11.8924
chr6	70385694	70507003	-	ENSG00000168216.6	LMBRD1	0.286075	Ubiquitous	24.6502	26.0593	32.2284	23.9698	21.5524	35.6267	24.1485
chr19	5691845	5720583	-	ENSG00000196365.7	LONP1	0.181271	Ubiquitous	9.19856	13.265	12.2091	12.9301	14.6449	13.7174	10.6211
chr3	197518097	197615307	+	ENSG00000186001.8	LRCH3	0.238498	Ubiquitous	18.5589	20.3421	18.1482	16.3673	8.57036	14.648	16.6507
chr6	150139934	150186199	-	ENSG00000120256.5	LRP11	0.283377	Ubiquitous	15.2152	15.1172	14.7776	11.468	4.73526	17.0124	11.8355
chr12	12268959	12419946	-	ENSG00000070018.4	LRP6	0.204737	Ubiquitous	6.80357	10.4092	14.4108	12.1794	13.0749	14.0928	12.2024
chr1	46726868	46769280	-	ENSG00000132128.12	LRRC41	0.289486	Ubiquitous	12.8445	14.3261	17.9867	17.386	11.0143	21.4329	17.8127
chr1	3696784	3713068	-	ENSG00000130764.5	LRRC47	0.230567	Ubiquitous	9.9038	14.4439	15.732	16.2196	13.4783	18.636	16.2571
chr3	120043356	120068186	-	ENSG00000163428.3	LRRC58	0.218598	Ubiquitous	8.41154	8.80949	10.7124	7.88736	5.56804	10.0123	9.5353
chr3	194361517	194393206	-	ENSG00000041802.6	LSG1	0.222805	Ubiquitous	11.8704	6.76144	12.8534	9.24472	8.37919	12.6432	11.0388
chr8	38020839	38034248	-	ENSG00000175324.5	LSM1	0.243225	Ubiquitous	12.5734	7.86016	9.32351	12.4817	7.53021	10.414	13.2543
chr1	36856839	36863493	-	ENSG00000181817.5	LSM10	0.273393	Ubiquitous	7.80738	7.79879	10.9388	13.5995	9.12307	11.6264	11.9944
chr17	42112003	42144987	-	ENSG00000161654.5	LSM12	0.297937	Ubiquitous	12.5254	7.77055	7.59325	11.0032	7.17878	9.50634	9.70957
chr20	60697517	60710434	+	ENSG00000149657.15	LSM14B	0.258402	Ubiquitous	13.5203	16.5418	13.0841	12.8	7.20971	13.4248	13.5651
chr19	18417040	18434084	-	ENSG00000130520.6	LSM4	0.203551	Ubiquitous	12.2873	8.9519	8.5584	11.7165	8.04004	11.3021	12.7349
chr17	7760003	7788556	-	ENSG00000183011.9	LSMD1	0.204354	Ubiquitous	22.3256	23.986	18.6371	23.3701	16.0593	24.7271	13.6659
chr12	6484211	6500733	+	ENSG00000111321.6	LTBR	0.218249	Ubiquitous	21.4543	2.58459	27.2601	29.0627	28.9306	28.2217	27.8676
chr21	30300466	30365270	-	ENSG00000198862.9	LTN1	0.172316	Ubiquitous	11.608	10.6099	11.4481	9.55247	6.55596	11.2687	12.2919
chr17	48796905	48833574	+	ENSG00000108848.11	LUC7L3	0.249952	Ubiquitous	32.6542	32.2992	28.716	21.1846	14.264	34.5029	26.1551
chr1	219347186	219386207	+	ENSG00000143353.7	LYPLAL1	0.25939	Ubiquitous	9.6006	11.3572	11.0651	8.29979	8.34002	12.8279	8.34002
chr1	9982173	10003465	-	ENSG00000162441.7	LZIC	0.292256	Ubiquitous	11.3547	11.107	10.9248	11.7455	6.35258	11.2827	14.7811
chr22	21333751	21353327	+	ENSG00000099949.14	LZTR1	0.21867	Ubiquitous	8.31513	13.0675	15.2923	13.3159	7.61819	14.1023	15.2711
chr16	79619740	79634611	-	ENSG00000178573.6	MAF	0.184753	Ubiquitous	21.4227	11.5971	21.2873	19.3463	19.8318	21.6062	12.2012
chr1	117910071	118071494	+	ENSG00000198162.8	MAN1A2	0.289219	Ubiquitous	14.4388	18.9598	12.1486	13.7933	9.81539	17.1174	13.5442
chr15	67835047	68099461	+	ENSG00000137764.15	MAP2K5	0.284314	Ubiquitous	8.82557	12.6989	11.2864	8.11315	5.1865	10.3589	10.7602
chr19	7968728	7979363	+	ENSG00000076984.13	MAP2K7	0.227531	Ubiquitous	4.4188	9.43813	11.9572	12.2479	7.78891	11.3908	11.7728
chr3	185000729	185206885	+	ENSG00000073803.9	MAP3K13	0.155214	Ubiquitous	10.5634	12.9647	9.61377	10.8388	10.0707	13.0943	12.32
chr2	128056306	128146041	-	ENSG00000169967.12	MAP3K2	0.281581	Ubiquitous	15.8613	12.2196	23.0999	17.9785	18.8279	25.1244	20.3117
chr6	136878185	137113656	-	ENSG00000197442.8	MAP3K5	0.271475	Ubiquitous	11.6887	13.7001	13.54	7.87911	4.7312	12.7959	9.25023
chr6	91223292	91296764	-	ENSG00000135341.13	MAP3K7	0.192989	Ubiquitous	9.72194	10.8668	10.1015	8.36022	4.992	10.8995	8.73361
chr2	39476407	39664453	-	ENSG00000011566.10	MAP4K3	0.231445	Ubiquitous	13.6007	16.3111	20.0741	19.9197	8.52041	17.4956	16.721
chr6	35995488	36079013	+	ENSG00000112062.6	MAPK14	0.277887	Ubiquitous	12.8521	13.3465	26.9726	25.4277	18.301	27.1582	28.6332
chr14	55518349	55536910	+	ENSG00000168175.10	MAPK1IP1L	0.217935	Ubiquitous	16.4276	11.2101	18.1439	15.9632	8.86022	17.1909	15.4863
chr10	49514698	49647403	+	ENSG00000107643.11	MAPK8	0.275907	Ubiquitous	13.5921	20.2959	16.5228	13.2731	11.9405	21.1402	16.2205
chr9	128199672	128469513	-	ENSG00000119487.12	MAPKAP1	0.213647	Ubiquitous	18.3304	19.34	25.3782	26.3795	12.9525	24.4998	26.8922
chr12	112279782	112334343	+	ENSG00000089022.9	MAPKAPK5	0.274868	Ubiquitous	9.46724	12.684	12.4758	10.3844	6.9511	13.1237	14.9596
chr19	8478154	8503901	+	ENSG00000099785.6	MARCH2	0.231323	Ubiquitous	10.8843	16.7801	19.2245	15.7301	10.2085	19.2277	19.9597
chr5	10353815	10440500	+	ENSG00000145495.10	MARCH6	0.220203	Ubiquitous	22.4509	40.6616	39.2778	30.9621	21.9202	38.3957	37.24
chr2	160569000	160627538	+	ENSG00000136536.10	MARCH7	0.299917	Ubiquitous	27.6375	16.3901	34.4687	23.945	15.0503	32.0651	29.6976
chr10	45950035	46090354	-	ENSG00000165406.11	MARCH8	0.286109	Ubiquitous	5.10248	8.88294	12.1942	12.0016	8.35335	11.3937	13.5241
chr11	63606400	63678491	+	ENSG00000072518.16	MARK2	0.274193	Ubiquitous	20.1124	13.1853	15.9078	15.1928	6.04873	18.3552	20.3916
chr14	103851729	103970168	+	ENSG00000075413.13	MARK3	0.280248	Ubiquitous	33.0891	27.9845	36.9502	23.7853	14.7338	34.4548	25.5223
chr12	57869228	57911352	+	ENSG00000166986.8	MARS	0.178649	Ubiquitous	16.7777	24.7534	21.7912	23.4435	12.714	24.1263	25.0819
chr19	19431490	19469563	+	ENSG00000129933.16	MAU2	0.281957	Ubiquitous	13.2358	17.5647	19.688	15.7133	9.66531	21.418	16.4074
chr18	47793252	47808144	-	ENSG00000141644.13	MBD1	0.268008	Ubiquitous	10.9853	19.2911	22.7005	21.6769	12.6001	24.5665	20.6407
chr19	1576639	1592882	-	ENSG00000071655.13	MBD3	0.298299	Ubiquitous	7.8291	23.2355	25.6581	21.2666	16.4727	27.8624	22.8445
chr3	129149787	129158878	-	ENSG00000129071.5	MBD4	0.246996	Ubiquitous	7.85781	8.23351	13.3751	10.6769	8.72915	13.0549	13.7068
chr21	47655047	47706211	-	ENSG00000160294.6	MCM3AP	0.281527	Ubiquitous	18.3918	20.5407	29.4907	20.2034	14.6904	27.4422	25.8611
chr7	75677369	75696826	+	ENSG00000146701.7	MDH2	0.183891	Ubiquitous	18.1567	14.0795	10.6867	17.1857	18.1054	12.751	16.0986
chr1	37958176	37980375	-	ENSG00000163875.11	MEAF6	0.266922	Ubiquitous	15.29	20.8944	25.4914	19.9365	14.0153	22.915	19.0719
chr17	37560538	37607539	-	ENSG00000125686.7	MED1	0.222885	Ubiquitous	10.4687	7.86717	12.7673	12.2834	5.7759	11.6122	11.5227
chr5	6371994	6378707	-	ENSG00000133398.3	MED10	0.170778	Ubiquitous	11.244	10.6761	13.2213	12.5548	6.75714	11.9656	12.5827
chrX	70338406	70362303	+	ENSG00000184634.11	MED12	0.299672	Ubiquitous	8.4035	6.38073	11.1473	8.63409	3.98756	10.2351	9.19965
chr17	60019966	60142643	-	ENSG00000108510.5	MED13	0.193249	Ubiquitous	20.5748	17.3849	23.7453	18.0429	14.3452	21.8972	22.6946
chrX	40507558	40595110	-	ENSG00000180182.6	MED14	0.265591	Ubiquitous	12.6536	11.7204	12.2525	11.9523	7.11657	15.5536	12.8407
chr19	867962	893218	-	ENSG00000175221.10	MED16	0.200237	Ubiquitous	7.02355	11.4062	15.391	14.9539	11.1975	15.7515	15.6126
chr17	38175350	38217468	-	ENSG00000008838.13	MED24	0.237596	Ubiquitous	12.477	15.4169	17.2725	14.0456	7.43005	14.6753	14.9673
chr4	17616254	17635728	+	ENSG00000118579.7	MED28	0.268201	Ubiquitous	7.72719	9.86143	11.6326	9.13044	4.11833	12.1838	11.0266
chr13	48627459	48669267	-	ENSG00000136146.10	MED4	0.163899	Ubiquitous	15.0026	11.676	16.0961	14.4341	8.83608	15.2677	15.5314
chr14	71047974	71067384	-	ENSG00000133997.7	MED6	0.224668	Ubiquitous	12.6259	12.4582	13.4548	9.73526	6.94775	14.1172	10.4512
chr1	43849588	43855479	-	ENSG00000159479.12	MED8	0.189012	Ubiquitous	11.9182	8.0848	10.7745	9.18336	8.62324	12.2989	11.2614
chr1	156433519	156470620	-	ENSG00000116604.13	MEF2D	0.295465	Ubiquitous	11.3265	19.8364	22.7819	22.7096	6.92756	16.1504	19.3533
chr16	8715540	8740081	+	ENSG00000067365.10	METTL22	0.229767	Ubiquitous	8.23898	7.3575	11.0206	9.62295	6.66019	9.38991	9.66099
chr7	128116783	128146656	+	ENSG00000165055.11	METTL2B	0.205235	Ubiquitous	7.00067	10.0607	9.76794	8.0878	6.07408	10.6959	10.0133
chr2	170666591	170681441	-	ENSG00000138382.9	METTL5	0.207415	Ubiquitous	12.8364	10.3118	8.47802	12.2944	6.81903	10.7395	12.401
chr16	21608539	21668794	+	ENSG00000197006.9	METTL9	0.238772	Ubiquitous	35.4156	33.0314	30.4152	25.3112	8.51551	35.1183	29.3646
chr18	48700920	48744674	-	ENSG00000176624.9	MEX3C	0.269532	Ubiquitous	9.48329	7.23771	12.5969	9.63429	5.03017	12.3081	11.5162
chr10	103544200	103578696	-	ENSG00000198408.9	MGEA5	0.183054	Ubiquitous	58.6659	53.5289	53.692	43.4198	27.7259	55.6487	53.5461
chr16	4666494	4740975	+	ENSG00000102858.8	MGRN1	0.238566	Ubiquitous	8.16425	25.6709	24.1692	22.7992	18.202	24.6662	19.279
chr1	165600098	165631033	+	ENSG00000143198.8	MGST3	0.292674	Ubiquitous	36.9185	50.9238	64.9018	69.9332	37.1025	64.6935	76.4554
chr1	222791428	222841354	+	ENSG00000154305.12	MIA3	0.244615	Ubiquitous	18.2901	14.5791	14.2499	18.2983	21.4989	17.2482	14.7741
chr18	19284918	19450918	+	ENSG00000101752.7	MIB1	0.230847	Ubiquitous	11.4142	16.2642	15.2621	12.1833	7.12161	15.2132	13.8636
chr22	39895437	39914137	+	ENSG00000100335.8	MIEF1	0.25331	Ubiquitous	5.23331	9.38093	10.1307	7.75404	9.34219	10.2357	11.6239
chr17	37884749	37887040	-	ENSG00000141741.7	MIEN1	0.159545	Ubiquitous	7.3669	9.0626	7.92296	10.1027	7.17413	9.88041	9.53816
chr1	47023090	47082515	-	ENSG00000079277.15	MKNK1	0.261682	Ubiquitous	14.9741	17.5895	22.0077	19.0788	11.9885	13.2095	22.3138
chr3	12598513	12625212	+	ENSG00000075975.11	MKRN2	0.290017	Ubiquitous	5.67378	8.33078	8.70286	7.68387	4.4796	10.1773	8.48348
chr12	6857170	6876641	-	ENSG00000089693.6	MLF2	0.241549	Ubiquitous	28.4995	51.7669	33.1688	41.5252	50.2479	41.6691	40.4654
chr10	21823094	22032559	+	ENSG00000078403.12	MLLT10	0.273764	Ubiquitous	17.0356	9.76844	15.8653	11.0177	8.60945	16.1192	12.8513
chr2	150426148	150444330	-	ENSG00000168288.8	MMADHC	0.28767	Ubiquitous	38.4465	13.2978	29.0401	29.5823	32.851	28.1425	40.0938
chr17	2287354	2304412	-	ENSG00000070444.10	MNT	0.199678	Ubiquitous	10.4262	9.46571	9.30548	10.1197	4.55351	7.77226	8.84944
chr2	198380295	198418423	+	ENSG00000115540.10	MOB4	0.203507	Ubiquitous	10.2968	10.0542	12.2832	11.9879	4.87467	9.41957	12.0676
chr5	52391509	52405893	-	ENSG00000164172.14	MOCS2	0.291927	Ubiquitous	8.61455	14.2738	9.05337	11.6271	10.9097	12.2388	8.19789
chr2	74688184	74692537	-	ENSG00000115275.7	MOGS	0.296413	Ubiquitous	6.73086	6.79354	16.9341	14.2998	14.2377	16.8555	12.5703
chr12	62860597	62991363	+	ENSG00000061987.10	MON2	0.246161	Ubiquitous	27.6773	21.4193	24.5592	17.3111	15.2751	25.4089	21.2118
chr15	79102829	79190475	+	ENSG00000185787.10	MORF4L1	0.155966	Ubiquitous	67.3335	64.1002	73.2053	73.2315	34.5953	75.0301	67.502
chrX	102930424	102943086	-	ENSG00000123562.12	MORF4L2	0.226329	Ubiquitous	53.5935	68.6859	57.7496	61.9035	49.0809	75.755	60.6433
chr1	113215763	113243368	+	ENSG00000155363.14	MOV10	0.277423	Ubiquitous	9.49763	4.80135	14.2923	11.114	11.9036	12.3815	12.2658
chr16	127006	135852	+	ENSG00000103152.7	MPG	0.190902	Ubiquitous	10.0553	4.89375	9.73864	9.85721	8.9169	10.8074	9.00349
chr13	20207788	20247599	+	ENSG00000196199.9	MPHOSPH8	0.228157	Ubiquitous	15.0086	12.1333	13.5997	11.0939	5.04637	15.2085	13.5497
chr15	75182346	75191798	+	ENSG00000178802.13	MPI	0.288225	Ubiquitous	6.26884	11.3388	6.66677	9.45733	5.30982	10.4186	10.3025
chr11	59573608	59578345	-	ENSG00000166902.4	MRPL16	0.275586	Ubiquitous	10.9732	8.30065	10.6029	14.5543	15.3705	7.92227	14.4544
chr6	160210844	160219468	+	ENSG00000112110.5	MRPL18	0.291197	Ubiquitous	21.4092	12.5234	14.4561	20.056	12.1173	16.3774	15.5189
chr2	75873909	75917977	+	ENSG00000115364.9	MRPL19	0.260935	Ubiquitous	10.3982	17.1175	13.747	13.0169	11.0638	13.3593	14.3206
chr6	43021767	43027544	-	ENSG00000112651.7	MRPL2	0.279965	Ubiquitous	7.76352	6.43931	6.54265	7.63658	10.4329	8.73184	7.95842
chr11	68658744	68671303	-	ENSG00000197345.8	MRPL21	0.274794	Ubiquitous	14.1779	9.87202	6.96903	14.5451	9.00892	11.3219	11.9395
chr11	1968508	2005752	+	ENSG00000214026.6	MRPL23	0.236205	Ubiquitous	17.1977	9.98863	17.365	16.4958	21.1319	20.3423	15.453
chr17	48445218	48450575	-	ENSG00000108826.11	MRPL27	0.221194	Ubiquitous	9.12983	10.9804	12.6092	16.9545	17.829	16.4707	17.1675
chr16	417384	420527	-	ENSG00000086504.11	MRPL28	0.166108	Ubiquitous	10.0882	10.3188	7.54518	9.41206	8.59935	8.8302	7.15342
chr3	131181056	131221827	-	ENSG00000114686.4	MRPL3	0.251165	Ubiquitous	25.4857	15.9166	16.9183	19.4074	14.4	25.8798	24.1502
chr7	42971799	42988557	+	ENSG00000106591.3	MRPL32	0.253787	Ubiquitous	14.1908	7.31732	9.18957	11.7657	12.8299	11.093	11.3405
chr17	73894724	73905899	-	ENSG00000204316.8	MRPL38	0.207871	Ubiquitous	11.6641	14.1995	15.8445	15.1514	14.7856	16.5244	18.5512
chr19	10362577	10370721	+	ENSG00000105364.9	MRPL4	0.138245	Ubiquitous	10.6084	9.10233	7.83813	11.0462	10.2797	10.2096	9.07638
chr10	102729215	102747272	-	ENSG00000055950.12	MRPL43	0.293342	Ubiquitous	11.4054	13.4735	17.2515	19.7615	18.0581	23.0536	17.7961
chr1	228294380	228297013	-	ENSG00000162910.14	MRPL55	0.284724	Ubiquitous	4.87123	10.7814	10.8436	12.1065	14.346	14.2487	8.71674
chr1	151732119	151736040	-	ENSG00000143436.6	MRPL9	0.297645	Ubiquitous	8.86623	7.03164	9.3177	11.199	6.17891	12.0929	8.36776
chr3	138724648	139076065	+	ENSG00000175110.7	MRPS22	0.160155	Ubiquitous	13.4062	12.0757	12.3975	12.189	12.192	12.6575	14.8674
chr20	3026591	3028900	+	ENSG00000125901.5	MRPS26	0.279432	Ubiquitous	9.79467	9.23775	7.94055	9.96236	12.1021	13.5431	9.51485
chr7	140705854	140715028	-	ENSG00000090263.11	MRPS33	0.283819	Ubiquitous	13.2554	9.25112	6.77918	12.4149	11.4652	14.6315	15.7775
chr16	1821891	1823156	-	ENSG00000074071.9	MRPS34	0.136344	Ubiquitous	16.1609	10.8772	12.7796	14.2185	15.8172	16.1945	14.0656
chr2	95752952	95815179	-	ENSG00000144029.7	MRPS5	0.193616	Ubiquitous	16.7913	16.1439	12.9674	12.1926	11.9296	14.0586	13.9492
chr17	73257755	73262454	+	ENSG00000125445.6	MRPS7	0.209138	Ubiquitous	12.75	9.77757	10.2777	14.8472	11.6475	12.746	15.183
chr9	125026882	125085743	+	ENSG00000148187.13	MRRF	0.253364	Ubiquitous	12.7366	7.8338	11.7731	10.3109	9.67977	14.8123	14.0223
chr6	24403153	24425810	+	ENSG00000124532.10	MRS2	0.259754	Ubiquitous	8.98816	8.6566	11.9478	10.0094	6.84316	12.6456	13.3043
chr17	38278551	38293042	+	ENSG00000188895.7	MSL1	0.246267	Ubiquitous	20.8001	32.9308	31.6609	24.426	14.8909	27.0529	30.0955
chrX	11776278	11793870	+	ENSG00000005302.13	MSL3	0.292886	Ubiquitous	12.327	8.61924	13.1937	9.09355	5.49614	9.90259	10.5382
chr11	62360686	62369312	-	ENSG00000149480.2	MTA2	0.289379	Ubiquitous	23.8477	12.5794	22.4807	21.0273	9.57041	15.4783	20.5438
chr9	21802542	21931646	+	ENSG00000099810.14	MTAP	0.258561	Ubiquitous	10.4812	6.66378	12.8335	9.87968	8.46935	10.7588	10.8386
chr8	98656407	98740998	+	ENSG00000147649.5	MTDH	0.106355	Ubiquitous	23.4042	15.4653	22.4082	22.1894	21.7432	23.5333	20.9723
chr8	66556969	66683496	+	ENSG00000066855.11	MTFR1	0.291713	Ubiquitous	8.87347	5.02859	6.80832	8.70585	10.9102	8.10039	8.84852
chr1	26145131	26159432	+	ENSG00000117640.13	MTFR1L	0.221976	Ubiquitous	9.97644	19.4792	18.4052	25.1437	20.0171	24.5427	25.1844
chr10	135207598	135234811	+	ENSG00000148824.14	MTG1	0.23257	Ubiquitous	12.6522	9.97454	11.852	10.3237	11.9557	14.9368	12.0197
chr20	60758085	60778624	+	ENSG00000101181.13	MTG2	0.249437	Ubiquitous	6.81106	9.33318	10.9096	10.4589	9.39826	12.7872	10.6747
chr5	32227100	32313115	-	ENSG00000150712.6	MTMR12	0.287931	Ubiquitous	10.3522	9.19871	15.2306	13.4545	7.99877	12.8688	11.1986
chr13	25802307	25862147	-	ENSG00000139505.10	MTMR6	0.284344	Ubiquitous	6.20536	8.13849	10.0154	7.77608	4.09868	8.26236	8.52464
chr1	11166592	11322564	-	ENSG00000198793.8	MTOR	0.196729	Ubiquitous	10.6903	13.8638	12.1342	12.0477	8.62739	11.7932	14.3489
chr8	17501304	17658426	-	ENSG00000129422.9	MTUS1	0.28545	Ubiquitous	42.485	40.9617	39.0376	27.524	26.3249	19.8967	28.401
chr11	65624597	65635124	+	ENSG00000172732.7	MUS81	0.287079	Ubiquitous	5.9317	8.55519	14.1983	13.6134	6.3024	13.2861	14.468
chr16	88718343	88729569	-	ENSG00000167508.6	MVD	0.242164	Ubiquitous	9.67741	13.5523	12.3751	8.96363	9.02659	10.687	10.8926
chr17	27400528	27507430	-	ENSG00000196535.10	MYO18A	0.268931	Ubiquitous	24.4359	26.1882	17.1231	19.5812	22.6306	11.6405	19.4611
chr1	59120411	59165764	-	ENSG00000162601.5	MYSM1	0.281341	Ubiquitous	15.0392	12.1066	12.9944	9.74882	5.95711	11.5802	12.4611
chr12	112464500	112546826	-	ENSG00000111300.5	NAA25	0.277874	Ubiquitous	11.5622	10.4194	8.14315	6.7001	5.37897	10.1896	9.26479
chr9	88556061	88637213	+	ENSG00000135040.11	NAA35	0.294129	Ubiquitous	10.2515	10.4719	9.26508	9.04581	5.18517	11.6785	13.1983
chr3	113435307	113465147	-	ENSG00000121579.8	NAA50	0.270675	Ubiquitous	23.7817	11.9293	17.5091	19.7795	14.7496	18.6731	21.427
chr16	3493611	3536963	+	ENSG00000122390.13	NAA60	0.200286	Ubiquitous	9.97973	14.9154	19.1615	19.5762	14.9887	17.1306	19.9555
chr12	57482677	57489259	+	ENSG00000166886.8	NAB2	0.286224	Ubiquitous	6.991	6.59472	11.9027	12.6598	12.0632	7.73147	8.93452
chr16	66836778	66907159	-	ENSG00000159593.10	NAE1	0.235425	Ubiquitous	19.7366	18.5266	16.0041	12.5676	7.7273	17.7121	18.0031
chr4	164031225	164088073	-	ENSG00000145414.4	NAF1	0.264554	Ubiquitous	7.90802	10.107	11.9476	8.88786	5.11948	10.2039	10.4947
chr2	71291474	71306935	+	ENSG00000124357.8	NAGK	0.227616	Ubiquitous	18.8195	14.7025	21.3684	17.6827	12.405	18.2597	17.1583
chr12	76438670	76478813	-	ENSG00000187109.9	NAP1L1	0.270769	Ubiquitous	58.6043	72.1327	72.6087	60.6733	22.2127	58.8259	45.242
chr11	2965667	3013607	-	ENSG00000205531.8	NAP1L4	0.265342	Ubiquitous	48.538	35.5991	37.0116	37.4435	22.7606	42.7529	38.3854
chr19	47990894	48018497	-	ENSG00000105402.3	NAPA	0.135225	Ubiquitous	29.2435	41.4648	43.7332	37.2548	43.558	37.2404	38.1545
chr17	80416056	80448413	+	ENSG00000141562.13	NARF	0.245921	Ubiquitous	7.7051	11.2122	11.8381	9.38197	5.4028	12.2167	9.73393
chr16	779753	791329	-	ENSG00000103245.9	NARFL	0.292421	Ubiquitous	5.82029	12.1738	9.32514	9.25917	6.41345	11.0656	9.79998
chr2	15307032	15701454	-	ENSG00000151779.8	NBAS	0.185657	Ubiquitous	12.0845	14.8456	15.2722	13.5928	6.28008	15.6365	15.9048
chr8	90945564	91015456	-	ENSG00000104320.9	NBN	0.196969	Ubiquitous	16.8656	12.4408	18.2274	16.7917	8.57651	18.9306	18.3091
chr22	50946645	50961901	+	ENSG00000025770.14	NCAPH2	0.282744	Ubiquitous	8.51012	11.904	14.953	11.2103	6.76413	13.2671	12.6951
chr9	100395908	100436030	+	ENSG00000136937.8	NCBP1	0.221033	Ubiquitous	8.48962	9.16438	9.57095	7.55831	5.90395	9.59993	10.7594
chr3	196662273	196669468	-	ENSG00000114503.6	NCBP2	0.298581	Ubiquitous	14.4319	19.2186	19.6437	18.3854	8.57423	24.2677	21.8771
chr8	71021997	71316040	-	ENSG00000140396.8	NCOA2	0.246455	Ubiquitous	20.1229	13.9621	17.4703	14.2418	15.4819	15.6351	14.1901
chr20	33284722	33413452	-	ENSG00000198646.9	NCOA6	0.280443	Ubiquitous	10.5979	8.64721	8.29439	9.003	3.24593	8.41895	8.14523
chr17	15932471	16121499	-	ENSG00000141027.16	NCOR1	0.222232	Ubiquitous	38.0971	25.3027	30.2895	37.2428	20.664	32.3769	31.9084
chr15	23930565	23932450	-	ENSG00000182636.4	NDN	0.26902	Ubiquitous	7.31353	13.2952	12.5507	13.2931	2.11289	10.6068	12.4343
chr2	240831867	240964819	-	ENSG00000130414.7	NDUFA10	0.282719	Ubiquitous	16.0914	23.5193	15.6103	16.6787	13.9329	16.5915	22.315
chr12	95290831	95397546	-	ENSG00000184752.8	NDUFA12	0.279107	Ubiquitous	15.7848	11.0663	8.40098	16.0359	9.89766	11.4952	12.716
chr19	19626545	19644285	+	ENSG00000186010.14	NDUFA13	0.227491	Ubiquitous	33.9931	45.3925	34.0517	55.3252	47.705	52.6367	42.6561
chr5	140018325	140027370	-	ENSG00000131495.4	NDUFA2	0.299315	Ubiquitous	19.2973	11.3682	11.5941	13.9321	17.9589	13.4647	12.8102
chr16	23592323	23607677	-	ENSG00000004779.5	NDUFAB1	0.239736	Ubiquitous	28.251	24.4802	18.8733	32.5031	28.6133	21.8132	26.2348
chr9	32552997	32573160	-	ENSG00000165264.6	NDUFB6	0.192356	Ubiquitous	12.2521	9.7951	8.13884	9.91059	10.5218	9.68104	12.4435
chr19	14676890	14682874	-	ENSG00000099795.2	NDUFB7	0.26305	Ubiquitous	47.6853	28.6238	33.3205	53.6418	48.446	39.4744	39.6381
chr10	102267203	102289757	-	ENSG00000166136.11	NDUFB8	0.282396	Ubiquitous	51.3837	39.9305	26.1613	48.5288	33.7231	33.3075	39.5877
chr11	67798084	67804111	+	ENSG00000110717.6	NDUFS8	0.296638	Ubiquitous	20.7794	21.4838	19.9245	32.8384	22.3504	26.9872	27.0587
chr11	67374323	67380006	+	ENSG00000167792.7	NDUFV1	0.205326	Ubiquitous	22.708	45.4901	33.6313	41.1395	45.0387	47.9838	49.4944
chr21	44299754	44333414	+	ENSG00000160194.13	NDUFV3	0.161413	Ubiquitous	9.75911	9.08266	12.6305	12.848	8.22735	12.6711	12.2743
chr14	24686058	24701660	-	ENSG00000129559.8	NEDD8	0.175318	Ubiquitous	26.3866	26.1319	25.0692	28.9594	18.9397	28.1411	18.6253
chr14	75548822	75594047	-	ENSG00000119638.8	NEK9	0.267427	Ubiquitous	15.9505	12.8761	24.5956	24.0273	12.7037	25.9284	23.8135
chr1	212606229	212619714	+	ENSG00000117691.5	NENF	0.253632	Ubiquitous	17.5895	22.1518	19.902	14.3268	13.9327	20.6171	12.8324
chr17	46125691	46138849	+	ENSG00000082641.11	NFE2L1	0.282402	Ubiquitous	26.1053	41.2565	53.5103	57.6414	40.5524	64.8108	59.9828
chr9	33290509	33371155	+	ENSG00000086102.14	NFX1	0.183278	Ubiquitous	15.5769	11.985	15.6718	14.4774	13.2499	17.8359	16.4406
chr3	25760435	25831530	-	ENSG00000151092.12	NGLY1	0.269122	Ubiquitous	10.8534	7.42023	11.3376	9.67192	8.75554	11.3258	13.5373
chr3	160822484	160971320	+	ENSG00000169251.8	NMD3	0.196584	Ubiquitous	19.4566	14.561	21.8818	16.8091	21.179	17.0134	16.4618
chr16	4511681	4545764	-	ENSG00000153406.9	NMRAL1	0.212873	Ubiquitous	8.21298	12.2779	12.8059	10.634	12.3021	14.4115	11.829
chr17	43128978	43186384	+	ENSG00000136448.7	NMT1	0.225475	Ubiquitous	12.3479	19.6493	21.23	16.3958	14.7445	21.6034	16.0265
chr1	879584	894689	-	ENSG00000188976.6	NOC2L	0.150965	Ubiquitous	12.8079	11.0641	12.1177	12.5826	10.4212	14.219	13.4411
chr16	67204057	67209643	+	ENSG00000140939.10	NOL3	0.298036	Ubiquitous	7.26003	5.99395	12.2241	11.3308	7.73367	10.1968	8.96995
chr10	103911933	103923627	+	ENSG00000166197.12	NOLC1	0.279256	Ubiquitous	10.7995	11.5387	10.612	13.2001	7.62557	14.8807	10.5751
chr16	14927538	14990017	+	ENSG00000103512.10	NOMO1	0.272369	Ubiquitous	10.9668	23.9323	20.5441	20.6065	12.0167	18.3025	22.0469
chr16	16326352	16388668	+	ENSG00000103226.13	NOMO3	0.295079	Ubiquitous	10.3463	19.3022	17.6973	13.5592	9.04978	14.9685	16.018
chrX	70503042	70521018	+	ENSG00000147140.11	NONO	0.282537	Ubiquitous	36.9606	25.7728	46.8887	46.9121	34.4351	53.4888	39.2881
chr20	2632791	2639039	+	ENSG00000101361.10	NOP56	0.280412	Ubiquitous	26.2474	22.4685	19.3619	15.9481	10.9773	22.4802	22.0876
chr14	24769068	24778330	+	ENSG00000196943.8	NOP9	0.257182	Ubiquitous	6.3862	7.59037	9.45557	8.93346	6.81847	9.44086	10.91
chr19	50058968	50093519	-	ENSG00000142546.9	NOSIP	0.191826	Ubiquitous	11.0896	7.95684	13.7593	12.3418	8.76109	12.9272	13.643
chr20	57264187	57294294	+	ENSG00000215440.7	NPEPL1	0.261271	Ubiquitous	8.99779	4.51781	10.2172	10.0383	4.17702	10.8973	10.3527
chr16	21845890	21892148	-	ENSG00000185864.12	NPIPB4	0.253658	Ubiquitous	33.727	41.3624	35.4075	25.8623	20.6007	33.2165	36.409
chr16	22490442	22547842	+	ENSG00000243716.6	NPIPB5	0.22633	Ubiquitous	48.3743	63.2784	54.2966	35.9272	33.1783	62.4708	59.4924
chr17	79523913	79615495	-	ENSG00000182446.9	NPLOC4	0.23503	Ubiquitous	22.7288	17.7017	27.9374	22.3935	16.5949	21.8329	26.976
chr3	14989091	15095107	+	ENSG00000177463.11	NR2C2	0.227791	Ubiquitous	13.6851	16.0385	17.744	14.251	6.75952	16.3118	15.1662
chr20	1422807	1454487	-	ENSG00000088833.13	NSFL1C	0.192545	Ubiquitous	15.7822	20.5207	18.3246	19.4773	11.8857	18.5741	15.3732
chr8	59496063	59572403	-	ENSG00000035681.3	NSMAF	0.263497	Ubiquitous	16.9794	12.2985	14.4675	13.9495	4.07056	14.2534	15.9929
chr8	126103921	126379362	+	ENSG00000156831.3	NSMCE2	0.203629	Ubiquitous	10.5476	6.73824	9.58381	8.72498	5.66954	9.76043	9.92204
chr10	123716603	123734732	-	ENSG00000107672.10	NSMCE4A	0.29731	Ubiquitous	19.9958	9.20083	18.4299	17.6764	12.0896	19.6488	23.0167
chr5	6599352	6633404	-	ENSG00000037474.10	NSUN2	0.160151	Ubiquitous	16.6366	10.1446	15.7183	12.8704	13.7737	15.0909	16.7162
chr7	151038785	151075535	+	ENSG00000013374.11	NUB1	0.265774	Ubiquitous	17.313	11.383	23.1232	19.5999	11.391	22.5584	19.6207
chr16	1832902	1839192	+	ENSG00000095906.12	NUBP2	0.216977	Ubiquitous	6.37842	11.134	15.7689	14.5474	16.6737	16.8538	14.679
chr19	49403307	49426629	+	ENSG00000104805.11	NUCB1	0.296463	Ubiquitous	41.8927	27.2972	76.274	68.0032	77.6235	65.4797	48.7195
chr1	205681947	205719404	-	ENSG00000069275.12	NUCKS1	0.288179	Ubiquitous	47.2348	70.313	55.2769	58.9306	36.8779	75.9873	55.903
chr1	27226729	27273353	+	ENSG00000090273.9	NUDC	0.260925	Ubiquitous	15.7969	13.6754	11.2057	16.8881	10.9562	14.0862	9.16891
chr16	56463045	56486111	-	ENSG00000167005.9	NUDT21	0.238682	Ubiquitous	20.971	25.3091	22.6599	17.0438	8.75517	24.1184	22.0614
chr10	12207324	12238143	-	ENSG00000165609.8	NUDT5	0.177247	Ubiquitous	11.4367	9.50569	13.4117	8.66651	13.2081	12.6115	10.7787
chr17	27582854	27621136	-	ENSG00000108256.4	NUFIP2	0.21562	Ubiquitous	16.0934	14.4148	18.2462	13.4489	10.9617	14.6561	16.2969
chr11	71713910	71791739	-	ENSG00000137497.13	NUMA1	0.268819	Ubiquitous	64.1387	45.4213	77.8257	59.321	24.2987	77.1745	71.0738
chr12	69080514	69136785	+	ENSG00000111581.5	NUP107	0.296755	Ubiquitous	11.4326	5.38487	10.7397	8.34296	4.80684	9.28959	9.6755
chr1	229577045	229644103	-	ENSG00000069248.9	NUP133	0.212632	Ubiquitous	11.0094	14.5436	15.2302	10.9023	6.19591	15.3974	14.859
chr6	17615269	17706656	-	ENSG00000124789.7	NUP153	0.210782	Ubiquitous	15.2004	9.86517	15.936	12.1862	9.74648	14.7365	13.7269
chr9	131709978	131769375	+	ENSG00000095319.10	NUP188	0.265848	Ubiquitous	11.8206	8.87494	12.427	9.47833	5.21914	9.63723	9.70973
chr7	135242667	135333505	+	ENSG00000155561.10	NUP205	0.242985	Ubiquitous	13.0044	7.20137	12.6376	10.0992	4.50258	11.9505	12.6761
chr9	134000948	134110057	+	ENSG00000126883.12	NUP214	0.190902	Ubiquitous	12.9047	11.3338	12.89	10.9083	7.02095	13.6533	11.2233
chr22	45559722	45583896	+	ENSG00000093000.14	NUP50	0.143528	Ubiquitous	16.6917	11.489	17.1506	14.5939	12.3579	17.2181	16.198
chr4	77035812	77069668	-	ENSG00000138750.10	NUP54	0.170405	Ubiquitous	14.9381	11.4792	14.0757	12.2763	7.58829	15.1392	15.1674
chr19	50410082	50433020	-	ENSG00000213024.6	NUP62	0.262754	Ubiquitous	7.58955	6.89293	12.9903	13.0526	6.4094	11.8658	13.2928
chr17	73201754	73231853	+	ENSG00000125450.6	NUP85	0.259583	Ubiquitous	10.6341	8.46531	14.5942	9.64455	9.29517	13.9869	12.8086
chr17	5264258	5323480	-	ENSG00000108559.7	NUP88	0.256966	Ubiquitous	13.1943	7.03416	8.9976	9.05829	10.1236	13.0631	10.5462
chr11	3692313	3819022	-	ENSG00000110713.11	NUP98	0.290643	Ubiquitous	23.4307	10.912	23.8022	17.9227	13.0306	25.6732	20.1704
chr7	23221446	23240630	+	ENSG00000136243.12	NUPL2	0.217614	Ubiquitous	9.58068	11.6622	9.63473	8.85907	5.70042	10.9263	10.0447
chr16	67880635	67906470	+	ENSG00000102898.7	NUTF2	0.188434	Ubiquitous	14.1401	16.3766	16.1083	14.9516	7.3332	14.4721	12.7387
chr6	41001366	41065526	-	ENSG00000124596.12	OARD1	0.299222	Ubiquitous	8.18396	7.07122	9.54523	12.0603	10.6139	13.6433	9.89076
chr4	48807229	48863834	+	ENSG00000109180.10	OCIAD1	0.268154	Ubiquitous	29.41	61.7885	46.1926	40.8731	43.4833	59.4915	51.8673
chr7	44646171	44748665	+	ENSG00000105953.10	OGDH	0.286723	Ubiquitous	24.5645	22.8849	32.238	41.8929	16.3518	41.4298	41.8186
chr20	61436187	61445352	+	ENSG00000060491.12	OGFR	0.293762	Ubiquitous	8.45973	8.24707	15.5527	13.6062	13.0526	12.9056	9.63237
chr3	193310933	193415612	+	ENSG00000198836.4	OPA1	0.243306	Ubiquitous	19.5416	20.899	12.8324	16.6547	11.0646	14.287	20.5045
chr11	69467844	69490184	-	ENSG00000149716.8	ORAOV1	0.254856	Ubiquitous	6.27192	10.7524	9.98377	8.29433	3.36991	10.4059	9.74691
chr6	88299839	88377169	+	ENSG00000135336.10	ORC3	0.265712	Ubiquitous	8.76659	11.936	10.5774	7.53532	5.4627	11.2487	8.99595
chr2	148687968	148779147	-	ENSG00000115947.9	ORC4	0.24167	Ubiquitous	9.28431	11.7921	10.9923	8.33259	5.7583	12.3942	10.234
chr12	58087738	58115340	+	ENSG00000135506.11	OS9	0.22154	Ubiquitous	46.2504	31.0733	71.864	64.1856	76.3508	74.387	68.8559
chr11	59341871	59383617	-	ENSG00000110048.7	OSBP	0.193536	Ubiquitous	13.1289	10.8864	16.4108	17.7321	18.4429	19.9295	19.9493
chr20	60813580	60871268	+	ENSG00000130703.11	OSBPL2	0.296607	Ubiquitous	15.9931	10.6082	11.7435	12.4328	6.21316	12.2173	14.2818
chr14	23235731	23241007	+	ENSG00000155463.8	OXA1L	0.218039	Ubiquitous	25.091	15.5841	29.2404	28.345	27.8767	34.1399	34.0393
chr14	23790498	23795394	+	ENSG00000100836.6	PABPN1	0.256225	Ubiquitous	20.3103	37.9711	28.6291	36.6283	21.6463	39.9877	33.2658
chr19	39876492	39881835	-	ENSG00000006712.10	PAF1	0.214011	Ubiquitous	12.1752	10.011	9.73183	11.8223	7.54047	11.6856	6.62603
chr11	117014983	117047610	+	ENSG00000168092.9	PAFAH1B2	0.24693	Ubiquitous	20.2583	30.8329	30.6332	21.3498	11.6923	29.0833	26.2989
chr5	43526369	43557860	-	ENSG00000172239.9	PAIP1	0.129304	Ubiquitous	15.83	14.7282	14.5155	14.1151	10.907	16.1691	14.3743
chr1	2439972	2458039	-	ENSG00000157881.9	PANK4	0.245268	Ubiquitous	6.22212	8.76285	10.0775	8.97755	6.45625	11.1063	9.7973
chr5	78907943	78982471	+	ENSG00000164329.9	PAPD4	0.198266	Ubiquitous	24.1721	18.203	24.2233	19.0503	13.5144	22.8976	18.6864
chr5	6714718	6757161	+	ENSG00000112941.8	PAPD7	0.285015	Ubiquitous	11.292	9.80463	14.0897	9.03449	8.84781	11.1968	10.2677
chr14	96967770	97033448	+	ENSG00000090060.13	PAPOLA	0.179345	Ubiquitous	56.9932	36.3323	58.8653	48.7317	32.5074	58.3027	56.9814
chr1	8014351	8045565	+	ENSG00000116288.8	PARK7	0.226654	Ubiquitous	43.4913	45.6351	37.1298	49.2862	50.5195	57.1656	39.191
chr11	59404189	59436453	-	ENSG00000166889.13	PATL1	0.239095	Ubiquitous	8.82833	5.32279	10.542	9.28011	8.2454	8.25007	8.20218
chr21	34106210	34144169	-	ENSG00000159086.10	PAXBP1	0.256036	Ubiquitous	18.3147	13.9144	15.4208	12.1469	9.11635	17.3021	13.8522
chr3	52579368	52719933	-	ENSG00000163939.14	PBRM1	0.25316	Ubiquitous	19.4885	15.8549	26.3809	22.8818	12.4929	24.0764	23.4196
chr2	70314585	70316332	+	ENSG00000169564.5	PCBP1	0.229427	Ubiquitous	98.4426	41.2852	91.3762	97.2698	69.3249	75.5884	80.2986
chr10	92979908	93044088	+	ENSG00000180628.10	PCGF5	0.121022	Ubiquitous	14.95	17.5444	18.4735	16.5765	11.6778	18.2784	18.3998
chr13	113831891	113863029	-	ENSG00000126226.17	PCID2	0.289826	Ubiquitous	8.33276	11.0235	15.9531	13.7161	8.95091	17.483	16.5195
chr8	52730140	52811735	-	ENSG00000168300.9	PCMTD1	0.272873	Ubiquitous	38.7211	26.448	53.83	53.0678	20.5231	51.6514	44.436
chr3	101292939	101313281	+	ENSG00000081154.7	PCNP	0.294203	Ubiquitous	17.1314	41.1377	46.4511	43.4327	19.1958	48.4448	37.8046
chr3	195941093	196014828	-	ENSG00000161217.7	PCYT1A	0.223152	Ubiquitous	16.0813	12.4338	19.0568	17.9277	9.65548	13.8849	18.8425
chr5	271736	353971	+	ENSG00000249915.3	PDCD6	0.262316	Ubiquitous	32.8009	23.5967	29.4765	23.586	16.2788	35.251	30.2858
chr4	157681606	157892546	-	ENSG00000145431.6	PDGFC	0.283143	Ubiquitous	6.04521	4.46781	11.0735	11.8323	9.3294	12.254	9.95786
chrX	19362011	19379823	+	ENSG00000131828.9	PDHA1	0.258533	Ubiquitous	17.1687	16.0475	13.9086	18.1555	15.8026	18.9135	22.4772
chr11	34937376	35042138	+	ENSG00000110435.7	PDHX	0.254836	Ubiquitous	8.7269	13.5946	10.2243	10.6387	9.7116	10.0565	11.4232
chr17	48172101	48189516	+	ENSG00000005882.7	PDK2	0.28988	Ubiquitous	5.88482	14.8444	8.40296	10.9443	13.1051	12.8382	12.0723
chr4	95373037	95589377	+	ENSG00000163110.10	PDLIM5	0.235888	Ubiquitous	41.9986	14.9854	31.6037	38.0984	40.9692	25.7693	41.1237
chr16	2587965	2653189	+	ENSG00000140992.14	PDPK1	0.254603	Ubiquitous	9.39985	16.078	17.3694	11.977	8.86236	16.407	17.9085
chr4	39824483	39979576	-	ENSG00000121892.10	PDS5A	0.27276	Ubiquitous	30.1599	16.439	28.8721	18.8561	15.669	28.5494	23.2156
chr22	30972612	31003070	-	ENSG00000100029.13	PES1	0.23835	Ubiquitous	10.4788	10.3034	14.3444	12.9213	9.2426	15.7297	14.5929
chr7	92116334	92157845	-	ENSG00000127980.11	PEX1	0.24033	Ubiquitous	7.90238	9.54014	8.04363	6.53317	5.24809	10.3807	10.0481
chr2	61244360	61279125	+	ENSG00000162928.8	PEX13	0.223052	Ubiquitous	10.2212	6.11908	10.634	7.87487	11.028	12.3102	11.5092
chr1	10532345	10690815	+	ENSG00000142655.8	PEX14	0.188283	Ubiquitous	7.80355	7.72711	9.55368	7.79144	10.0054	8.25364	7.60003
chr11	45931220	45940363	-	ENSG00000121680.11	PEX16	0.233388	Ubiquitous	4.89451	8.46042	9.00609	7.17587	9.55189	10.6877	10.0711
chr6	143771944	143811147	+	ENSG00000034693.10	PEX3	0.292376	Ubiquitous	9.85777	7.3901	7.10144	6.15352	7.23644	10.06	4.97275
chr5	139624624	139682706	-	ENSG00000113068.5	PFDN1	0.231244	Ubiquitous	12.678	15.0714	17.5003	16.1851	6.32949	15.5092	14.9477
chr6	83870869	83903655	-	ENSG00000013375.11	PGM3	0.208738	Ubiquitous	8.67203	8.02963	13.3519	9.20204	13.0631	12.7519	11.6705
chr4	129190397	129209984	-	ENSG00000164040.12	PGRMC2	0.267331	Ubiquitous	11.7439	13.4773	19.9263	27.7165	25.4979	27.2931	23.9038
chr1	33789224	33896653	-	ENSG00000134686.12	PHC2	0.238013	Ubiquitous	15.85	21.8171	31.5509	29.972	22.7656	27.0588	26.7846
chr3	169804520	169899537	-	ENSG00000173889.11	PHC3	0.265482	Ubiquitous	17.5188	15.5941	23.12	18.1726	9.99104	22.825	17.7909
chr6	170104001	170124151	-	ENSG00000130024.10	PHF10	0.178296	Ubiquitous	26.288	23.1857	30.6185	30.085	16.0691	27.3467	27.9814
chr20	34359896	34538303	+	ENSG00000025293.11	PHF20	0.258481	Ubiquitous	14.0895	10.1149	13.6055	11.9979	4.81531	11.053	11.0993
chr8	133787618	133861052	+	ENSG00000129292.16	PHF20L1	0.260152	Ubiquitous	22.0051	23.6787	20.6491	15.1905	10.0605	24.228	15.9663
chr6	64345725	64489229	+	ENSG00000118482.7	PHF3	0.195422	Ubiquitous	23.627	17.4168	22.5379	19.469	14.4224	24.4471	20.5446
chr16	47495034	47735434	+	ENSG00000102893.11	PHKB	0.261519	Ubiquitous	39.4843	24.1503	36.3466	25.5699	15.204	38.7322	34.9476
chr9	139743176	139745488	+	ENSG00000054148.13	PHPT1	0.296062	Ubiquitous	18.0357	13.6786	12.0009	17.0947	11.3573	21.5306	18.77
chr11	576486	612222	+	ENSG00000070047.7	PHRF1	0.200413	Ubiquitous	9.22563	7.75276	11.1425	11.2874	7.41092	9.82915	8.79075
chr11	85668727	85780924	-	ENSG00000073921.13	PICALM	0.251298	Ubiquitous	64.0353	72.5414	80.5072	66.2146	45.1893	52.1447	61.5304
chr19	49949555	49956754	-	ENSG00000104872.6	PIH1D1	0.279806	Ubiquitous	13.7789	12.2566	14.0237	15.4262	12.4526	19.2785	15.3678
chr18	39535171	39667794	+	ENSG00000078142.7	PIK3C3	0.261959	Ubiquitous	13.5976	14.0572	12.4757	8.67403	5.88014	12.5126	9.10859
chr3	178865902	178957881	+	ENSG00000121879.3	PIK3CA	0.284403	Ubiquitous	8.68408	8.88342	10.5467	7.47662	4.19391	7.96481	8.08034
chr2	209130991	209223475	+	ENSG00000115020.12	PIKFYVE	0.221252	Ubiquitous	11.2961	12.8089	13.4043	9.4139	6.92261	12.5997	9.59016
chr1	151170425	151222012	+	ENSG00000143398.15	PIP5K1A	0.201861	Ubiquitous	19.9512	18.2463	20.7869	18.5573	11.3284	21.9603	16.2938
chr17	1421012	1466110	-	ENSG00000174238.10	PITPNA	0.223634	Ubiquitous	21.5108	19.9229	18.8653	14.2824	8.81542	20.7215	17.5941
chr10	3179920	3215003	-	ENSG00000107959.11	PITRM1	0.197401	Ubiquitous	16.3077	18.5712	15.7466	16.2366	10.4784	19.1778	15.0121
chr12	113796371	113827203	+	ENSG00000151176.3	PLBD2	0.271963	Ubiquitous	7.55814	13.6256	15.696	13.6477	10.2701	12.6774	10.7849
chr22	50713408	50746056	-	ENSG00000196576.10	PLXNB2	0.299185	Ubiquitous	49.688	12.2724	57.3224	50.3283	41.5473	62.6673	52.351
chr7	102937869	102969958	+	ENSG00000105819.9	PMPCB	0.217315	Ubiquitous	14.9458	14.7293	14.695	15.3816	15.7183	18.8056	20.0752
chr1	154897210	154909467	-	ENSG00000163344.5	PMVK	0.272078	Ubiquitous	17.1169	10.9141	10.9039	14.3343	15.6124	12.7369	10.257
chr6	89790470	89794879	+	ENSG00000146278.10	PNRC1	0.296741	Ubiquitous	95.4594	48.1647	107.203	106.199	43.1844	98.8909	60.451
chr9	116169515	116172952	-	ENSG00000148229.8	POLE3	0.267727	Ubiquitous	11.3957	8.70983	11.0717	10.5181	6.73997	10.2595	13.3591
chr17	7387685	7417933	+	ENSG00000181222.10	POLR2A	0.274151	Ubiquitous	32.6106	24.9094	32.5977	22.9581	13.3407	34.8212	25.2331
chr4	57843888	57897334	+	ENSG00000047315.10	POLR2B	0.209804	Ubiquitous	25.2525	18.4737	22.9282	20.8395	11.3774	23.8724	25.8889
chr19	1086594	1095598	-	ENSG00000099817.7	POLR2E	0.227097	Ubiquitous	17.5708	28.2414	29.4785	36.2747	36.7441	34.6993	24.1333
chr11	62529016	62534182	+	ENSG00000168002.7	POLR2G	0.210661	Ubiquitous	15.978	15.1938	19.5759	15.933	10.8958	20.2558	18.3557
chr16	22308730	22346424	+	ENSG00000058600.11	POLR3E	0.282629	Ubiquitous	10.4731	7.66403	9.69264	9.56597	7.53337	12.7358	9.88847
chr19	617223	633597	-	ENSG00000099821.9	POLRMT	0.188122	Ubiquitous	6.54058	9.11401	10.296	8.57553	10.9625	11.7244	11.6239
chr1	42921788	42939056	+	ENSG00000127125.7	PPCS	0.288554	Ubiquitous	15.6258	8.75496	21.3926	21.616	19.961	26.337	25.0736
chr11	70116806	70230509	+	ENSG00000131626.11	PPFIA1	0.251134	Ubiquitous	13.7297	18.3146	17.532	12.8821	9.30296	15.8719	12.9721
chr12	42632249	42853517	+	ENSG00000134283.13	PPHLN1	0.269421	Ubiquitous	18.7638	15.2514	14.4647	13.4012	8.44537	15.6835	15.0047
chr2	201735630	201754026	-	ENSG00000240344.4	PPIL3	0.296068	Ubiquitous	11.516	11.925	11.5559	8.88469	7.44004	14.4001	9.49838
chr14	60712470	60765805	+	ENSG00000100614.13	PPM1A	0.226481	Ubiquitous	14.2986	23.0421	19.1063	21.968	14.4339	14.5631	22.5712
chr2	27604061	27632554	-	ENSG00000115241.9	PPM1G	0.221455	Ubiquitous	14.4072	9.53107	13.9832	15.7497	8.16866	14.8336	12.6476
chr1	204372515	204380919	-	ENSG00000158615.8	PPP1R15B	0.183542	Ubiquitous	17.4229	12.9307	24.7503	24.8538	19.8469	24.3221	22.4795
chr2	242088991	242123067	+	ENSG00000115685.10	PPP1R7	0.146473	Ubiquitous	19.2335	17.8707	17.1634	17.3437	9.93729	18.0768	18.1062
chr1	28157289	28178187	+	ENSG00000117751.13	PPP1R8	0.230664	Ubiquitous	6.32236	8.5033	9.74006	9.48755	4.82558	10.5345	9.74861
chr5	133530025	133561833	-	ENSG00000113575.5	PPP2CA	0.188928	Ubiquitous	27.7363	27.1933	24.1729	21.5904	12.5908	24.5738	24.8556
chr8	30631973	30671830	-	ENSG00000104695.8	PPP2CB	0.218322	Ubiquitous	36.366	49.3699	49.63	37.5409	23.1927	48.6306	37.6676
chr19	52693292	52730687	+	ENSG00000105568.13	PPP2R1A	0.271846	Ubiquitous	35.9041	52.4256	44.1888	48.1815	21.6573	52.0998	58.2425
chr9	131873229	131911225	+	ENSG00000119383.15	PPP2R4	0.146709	Ubiquitous	25.5427	37.2965	38.3765	38.4781	25.9356	39.7658	37.9615
chr14	102228135	102394326	+	ENSG00000078304.15	PPP2R5C	0.21056	Ubiquitous	51.7053	45.1262	59.1635	48.6952	29.8997	47.5392	57.2706
chr6	42952237	42980080	+	ENSG00000112640.10	PPP2R5D	0.298643	Ubiquitous	7.95161	13.6513	10.4818	12.1753	6.2456	9.28649	11.3058
chr14	63838075	64010092	-	ENSG00000154001.9	PPP2R5E	0.295744	Ubiquitous	12.4707	10.4938	14.4552	13.9735	6.32584	14.4628	17.0823
chr16	30087299	30096698	+	ENSG00000149923.9	PPP4C	0.285139	Ubiquitous	28.5916	10.2521	31.4267	24.4153	26.6196	25.298	34.1799
chr3	73045936	73118350	+	ENSG00000163605.10	PPP4R2	0.143489	Ubiquitous	21.4653	17.277	19.7007	15.8788	18.6935	22.0512	20.3076
chr19	46850251	46896238	+	ENSG00000011485.10	PPP5C	0.178436	Ubiquitous	9.60784	14.085	12.7443	12.1485	10.3158	13.97	10.644
chr9	127908852	127952218	-	ENSG00000119414.7	PPP6C	0.225609	Ubiquitous	10.9265	15.8381	16.1328	12.1292	6.89894	16.5609	15.0221
chr19	55741148	55770363	-	ENSG00000105063.14	PPP6R1	0.279023	Ubiquitous	15.4755	17.5624	20.952	23.2133	11.1809	17.4389	17.8078
chr22	50781733	50883514	+	ENSG00000100239.11	PPP6R2	0.289721	Ubiquitous	12.7344	20.9009	18.1055	15.0585	23.9783	18.6339	16.7547
chr5	64859063	64883376	+	ENSG00000113593.7	PPWD1	0.225751	Ubiquitous	18.9921	15.6739	20.4334	14.7684	7.64053	20.3588	17.4895
chr1	156720402	156770607	+	ENSG00000143294.10	PRCC	0.240563	Ubiquitous	13.1685	15.5319	16.5789	17.7538	8.762	19.033	14.931
chr12	108126643	108155049	-	ENSG00000110851.7	PRDM4	0.28211	Ubiquitous	8.37767	7.48761	10.9359	7.85799	3.19302	9.61849	10.5697
chr19	12907634	12912694	-	ENSG00000167815.7	PRDX2	0.288406	Ubiquitous	37.2707	84.609	39.477	81.5075	74.0062	63.9	65.0822
chr6	41748087	41757879	+	ENSG00000124593.10	PRICKLE4	0.284393	Ubiquitous	12.9594	6.5914	12.9854	8.63218	8.07006	13.3368	8.02516
chr5	40759481	40798476	-	ENSG00000132356.7	PRKAA1	0.26439	Ubiquitous	20.9796	13.0568	28.3157	20.8835	19.6759	23.8944	26.4857
chr19	14202500	14228896	-	ENSG00000072062.9	PRKACA	0.216621	Ubiquitous	16.8187	22.1829	19.7288	23.8032	20.4124	17.0348	15.7043
chr12	49396057	49412980	-	ENSG00000181929.7	PRKAG1	0.175952	Ubiquitous	16.4512	13.8448	16.2962	18.5605	10.4479	17.3539	17.3743
chr7	151253197	151574210	-	ENSG00000106617.9	PRKAG2	0.2814	Ubiquitous	12.7833	12.4729	11.7059	17.2392	14.2361	9.22142	13.909
chr19	11546109	11561783	+	ENSG00000130175.5	PRKCSH	0.26239	Ubiquitous	32.7251	36.8792	50.0587	51.321	47.9579	61.2132	51.967
chr8	48685669	48872743	-	ENSG00000253729.3	PRKDC	0.20593	Ubiquitous	24.3151	19.7906	19.754	19.3055	10.3214	23.9455	22.7303
chr2	179296141	179316239	-	ENSG00000180228.8	PRKRA	0.155301	Ubiquitous	14.4182	16.7144	18.3736	16.4423	12.546	19.2227	18.9301
chr19	50179043	50192286	+	ENSG00000126457.16	PRMT1	0.286659	Ubiquitous	27.6838	21.4309	34.1781	29.9726	15.3769	37.956	33.8111
chr21	48055079	48085036	+	ENSG00000160310.12	PRMT2	0.227512	Ubiquitous	30.8371	27.5638	32.9703	30.0896	7.30665	29.1009	27.917
chr16	68344877	68392466	+	ENSG00000132600.12	PRMT7	0.263427	Ubiquitous	9.38611	14.2605	11.7683	10.4662	7.01435	13.9611	10.4272
chr8	37620111	37637283	+	ENSG00000147471.7	PROSC	0.16948	Ubiquitous	12.0692	11.6141	15.5621	14.7993	15.9483	16.8122	17.4198
chr1	109234945	109244425	+	ENSG00000134186.7	PRPF38B	0.291407	Ubiquitous	11.7171	10.508	16.9723	12.5657	7.80616	15.0576	14.5043
chr14	45553302	45585485	+	ENSG00000185246.13	PRPF39	0.26931	Ubiquitous	9.92743	9.07016	10.4519	7.69675	4.96279	12.0622	10.7735
chr17	1553923	1588176	-	ENSG00000174231.12	PRPF8	0.271253	Ubiquitous	36.4308	37.8571	56.3163	45.1265	24.6679	55.8369	46.3229
chr17	18743398	18834581	+	ENSG00000141127.10	PRPSAP2	0.29211	Ubiquitous	11.8683	13.3124	10.8526	9.29682	7.16763	15.0171	11.2848
chr19	50094900	50129696	+	ENSG00000126464.9	PRR12	0.267161	Ubiquitous	6.97199	9.05117	10.367	10.1851	3.02616	9.7029	6.64665
chr9	134269480	134375584	+	ENSG00000130723.13	PRRC2B	0.278086	Ubiquitous	26.0721	41.7799	39.9541	32.4039	14.2169	38.9545	29.3676
chr1	171454651	171562650	+	ENSG00000117523.11	PRRC2C	0.273181	Ubiquitous	34.742	26.1463	31.5473	28.9698	14.5142	27.3315	22.9977
chr19	36236015	36237911	+	ENSG00000205155.3	PSENEN	0.250576	Ubiquitous	10.8919	6.78644	7.45943	9.60525	7.5476	10.8372	6.74002
chr11	14515329	14665181	-	ENSG00000129084.13	PSMA1	0.273818	Ubiquitous	24.337	23.6756	37.5357	32.1752	28.1905	32.8221	41.0219
chr14	58711549	58738730	+	ENSG00000100567.8	PSMA3	0.173074	Ubiquitous	29.1717	17.7953	30.5764	28.739	30.2744	29.963	33.5621
chr15	78832747	78841604	+	ENSG00000041357.11	PSMA4	0.212719	Ubiquitous	35.1239	21.5651	29.9627	38.2633	27.2251	29.2944	37.5725
chr20	60711791	60718496	-	ENSG00000101182.10	PSMA7	0.19271	Ubiquitous	53.4369	26.1765	49.9671	55.0405	45.8281	39.7431	51.45
chr6	170844205	170862429	-	ENSG00000008018.8	PSMB1	0.206212	Ubiquitous	47.7676	27.8435	36.9797	46.9129	43.3058	39.642	32.8203
chr1	36067185	36107445	-	ENSG00000126067.7	PSMB2	0.110868	Ubiquitous	12.6966	14.4597	13.9445	13.4486	15.0194	11.9023	13.674
chr17	36908989	36920484	+	ENSG00000108294.4	PSMB3	0.196421	Ubiquitous	36.4087	20.8827	38.9633	38.3446	40.9194	42.5324	45.225
chr1	151372010	151374420	+	ENSG00000159377.6	PSMB4	0.261515	Ubiquitous	41.3643	40.6882	62.4758	65.4095	55.5704	67.2516	75.0996
chr14	23485752	23504439	-	ENSG00000100804.14	PSMB5	0.171018	Ubiquitous	16.8863	26.1167	21.3523	27.6781	23.8768	22.4695	26.9664
chr9	127115745	127177723	-	ENSG00000136930.8	PSMB7	0.28578	Ubiquitous	41.6033	31.5279	26.8975	28.1651	33.848	27.1118	30.7333
chr7	102984701	103009842	+	ENSG00000161057.6	PSMC2	0.107707	Ubiquitous	29.0998	21.8231	27.2465	29.2878	24.3662	29.4396	25.7891
chr19	40476912	40487348	+	ENSG00000013275.3	PSMC4	0.247885	Ubiquitous	17.0766	19.4041	18.0272	21.4608	16.4292	24.7554	25.9609
chr17	61904512	61909379	+	ENSG00000087191.8	PSMC5	0.214577	Ubiquitous	21.779	23.0757	18.2577	25.6189	16.4839	24.0899	17.0436
chr2	231921578	232037541	+	ENSG00000173692.8	PSMD1	0.222159	Ubiquitous	29.2298	24.9795	21.9812	25.4233	16.6761	20.1024	27.254
chrX	107327437	107334848	-	ENSG00000101843.14	PSMD10	0.236675	Ubiquitous	10.5409	15.3302	14.2896	11.9489	6.21796	14.9397	15.9974
chr17	30771279	30810336	+	ENSG00000108671.5	PSMD11	0.110473	Ubiquitous	17.8988	18.4471	19.542	18.8244	13.7498	16.6647	18.714
chr17	65334032	65362743	-	ENSG00000197170.5	PSMD12	0.15914	Ubiquitous	17.2265	16.4781	15.8717	13.4755	12.0847	13.5391	15.4615
chr11	236546	252983	+	ENSG00000185627.13	PSMD13	0.135832	Ubiquitous	18.0835	15.7115	21.6744	21.5199	14.4516	21.329	21.2867
chr3	184016497	184026842	+	ENSG00000175166.12	PSMD2	0.215041	Ubiquitous	23.8874	28.5097	30.795	31.907	17.9549	30.7905	34.7884
chr17	38137050	38154213	+	ENSG00000108344.10	PSMD3	0.167263	Ubiquitous	19.5166	21.988	24.1099	23.2882	21.9763	23.3495	26.8649
chr1	151227179	151239955	+	ENSG00000159352.11	PSMD4	0.174644	Ubiquitous	31.8215	34.256	30.4409	39.5764	30.6225	30.3101	38.5369
chr3	63996225	64009658	-	ENSG00000163636.6	PSMD6	0.249538	Ubiquitous	24.6709	17.145	19.0054	19.7553	15.8946	19.2829	20.0043
chr19	38865176	38874464	+	ENSG00000099341.7	PSMD8	0.219175	Ubiquitous	36.0092	23.51	28.7984	32.864	26.2882	28.8688	28.3718
chr14	24605367	24608176	+	ENSG00000092010.10	PSME1	0.285758	Ubiquitous	39.8658	13.6105	68.4167	70.7594	53.9924	57.626	71.0009
chr17	40976402	40995774	+	ENSG00000131467.6	PSME3	0.211482	Ubiquitous	17.33	29.1016	28.3624	30.203	15.566	31.4878	32.1386
chr2	54091204	54197977	-	ENSG00000068878.10	PSME4	0.238074	Ubiquitous	20.9333	12.9934	17.2899	17.1152	14.4072	18.1542	15.7379
chr20	1093906	1160596	+	ENSG00000125818.13	PSMF1	0.205011	Ubiquitous	12.2396	16.0187	22.8476	20.8657	20.3687	21.8977	17.5912
chr13	20248896	20357142	-	ENSG00000121390.13	PSPC1	0.248761	Ubiquitous	13.2457	14.1436	13.5316	11.5593	6.39603	15.6754	11.7796
chr9	72324438	72374875	-	ENSG00000188647.8	PTAR1	0.265701	Ubiquitous	19.4628	20.9887	24.7196	15.811	14.9112	20.6571	26.4539
chr2	86333305	86369280	+	ENSG00000132300.14	PTCD3	0.213675	Ubiquitous	21.3091	21.6095	21.5041	15.828	15.6548	25.2862	23.3936
chr8	97273943	97349223	+	ENSG00000156471.8	PTDSS1	0.186116	Ubiquitous	7.12233	8.09908	10.6021	7.47729	8.49612	10.2067	10.3717
chr11	448268	491393	+	ENSG00000174915.7	PTDSS2	0.28418	Ubiquitous	5.04667	11.0124	10.8252	8.3437	4.63094	11.4983	9.52511
chr10	89622870	89731687	+	ENSG00000171862.5	PTEN	0.186414	Ubiquitous	32.9085	18.1507	32.2528	25.0769	21.8211	31.9776	31.3645
chr12	57057127	57082159	-	ENSG00000110958.11	PTGES3	0.271247	Ubiquitous	31.96	56.3159	74.1018	63.4603	48.4254	74.6541	79.7978
chr3	123209667	123304032	-	ENSG00000206527.5	PTPLB	0.286383	Ubiquitous	9.83666	13.5405	16.0784	12.3043	18.0112	10.3582	18.7143
chr18	12785477	12929642	-	ENSG00000175354.14	PTPN2	0.292812	Ubiquitous	12.3923	6.58669	13.7831	9.01749	7.11968	12.5964	10.7709
chr3	47422501	47454931	+	ENSG00000076201.10	PTPN23	0.27351	Ubiquitous	6.67783	11.0653	11.7849	9.5546	5.71446	12.3929	9.22297
chr11	112097088	112140678	+	ENSG00000150787.3	PTS	0.245697	Ubiquitous	16.8626	12.7329	11.2653	10.3325	15.6583	13.4062	12.9221
chr8	144898514	144912029	-	ENSG00000179950.9	PUF60	0.117771	Ubiquitous	12.4226	19.3222	17.0958	18.4031	16.5522	18.9356	18.8706
chr1	31404353	31538838	-	ENSG00000134644.11	PUM1	0.284572	Ubiquitous	22.6571	24.0677	30.3769	23.994	15.7369	33.6973	27.8154
chr2	20448452	20551995	-	ENSG00000055917.11	PUM2	0.238482	Ubiquitous	41.0423	45.6716	58.2172	53.1744	30.2083	62.5292	57.3886
chr7	44915896	44924960	-	ENSG00000146676.5	PURB	0.219944	Ubiquitous	12.2933	13.8983	13.6576	13.296	4.96928	14.2379	15.4588
chr12	108079509	108106944	+	ENSG00000136045.7	PWP1	0.291484	Ubiquitous	13.9778	9.95352	10.5899	10.5598	6.63613	11.2897	10.3919
chr1	226107578	226111978	-	ENSG00000143811.12	PYCR2	0.261781	Ubiquitous	8.83897	14.201	14.8069	12.1222	7.03477	12.1641	11.2236
chr4	89442136	89444964	-	ENSG00000145337.4	PYURF	0.246745	Ubiquitous	30.1794	17.9143	25.6799	23.8306	18.7087	24.546	25.7173
chr3	49067140	49131796	-	ENSG00000198218.6	QRICH1	0.221671	Ubiquitous	14.3964	15.0699	16.0934	17.7419	8.31829	16.2669	12.7095
chr11	32914724	33014862	+	ENSG00000060749.10	QSER1	0.294542	Ubiquitous	10.9945	10.2356	10.22	7.80408	4.42861	12.4125	8.85607
chr8	23127633	23153792	+	ENSG00000104679.6	R3HCC1	0.274797	Ubiquitous	6.3598	9.86416	8.57952	11.2576	6.37914	9.31186	8.48958
chr19	896503	913240	-	ENSG00000198858.5	R3HDM4	0.227378	Ubiquitous	16.8295	10.5096	16.623	18.3195	9.38156	13.3678	18.2131
chr18	8609443	8639379	+	ENSG00000206418.3	RAB12	0.275563	Ubiquitous	18.6616	14.7173	19.6201	16.7896	9.85315	12.0031	13.2565
chr10	27793197	27831143	+	ENSG00000099246.12	RAB18	0.193223	Ubiquitous	21.9841	20.8183	17.9962	18.6897	11.3363	19.8974	17.6797
chr2	65297835	65357240	-	ENSG00000138069.12	RAB1A	0.297058	Ubiquitous	32.6407	26.8202	36.2589	32.3171	24.9862	40.7523	45.9439
chr11	66036004	66044963	+	ENSG00000174903.10	RAB1B	0.279868	Ubiquitous	43.7198	29.7827	47.1255	53.9789	26.5532	43.1723	42.8781
chr12	72148654	72184699	+	ENSG00000080371.4	RAB21	0.213457	Ubiquitous	16.3267	12.4719	15.9638	13.5328	8.40737	13.5664	13.1075
chr20	56884752	56942563	+	ENSG00000124209.3	RAB22A	0.249268	Ubiquitous	9.74914	11.9028	10.8823	8.89695	4.25637	10.452	9.37816
chr8	61429416	61536186	+	ENSG00000104388.10	RAB2A	0.286998	Ubiquitous	42.5178	32.6783	31.958	29.8239	20.5534	33.9903	32.8879
chr2	135809835	135933964	+	ENSG00000115839.13	RAB3GAP1	0.233687	Ubiquitous	16.9552	16.5143	17.2663	18.3898	7.10296	17.1116	20.3007
chr1	220321635	220445796	-	ENSG00000118873.11	RAB3GAP2	0.217728	Ubiquitous	11.7936	10.9871	13.8358	9.62642	7.17564	13.3644	11.9929
chr1	229406822	229441641	+	ENSG00000168118.7	RAB4A	0.141507	Ubiquitous	12.5451	14.5628	11.7271	15.0254	12.6126	13.7632	15.577
chr19	41284121	41302847	+	ENSG00000167578.12	RAB4B	0.285854	Ubiquitous	5.58238	11.8224	11.3122	8.49001	4.78905	10.5349	9.94916
chr3	19988571	20026667	+	ENSG00000144566.6	RAB5A	0.277601	Ubiquitous	33.3009	29.3424	28.1884	24.6771	13.6556	24.9907	23.4852
chr12	56367697	56388490	+	ENSG00000111540.11	RAB5B	0.270351	Ubiquitous	14.9373	48.6116	48.1891	46.6438	22.087	36.9553	44.004
chr17	40276994	40307035	-	ENSG00000108774.10	RAB5C	0.291377	Ubiquitous	16.8152	24.6331	39.2969	37.237	21.8923	37.033	29.4697
chr9	125703112	125867145	+	ENSG00000011454.12	RABGAP1	0.255156	Ubiquitous	30.8486	29.002	21.7226	28.3889	7.82088	33.1151	30.2107
chr1	76251879	76260764	+	ENSG00000137955.11	RABGGTB	0.262144	Ubiquitous	26.6089	18.2952	22.5173	18.0759	14.756	20.1859	23.9709
chr8	117858174	117887105	-	ENSG00000164754.8	RAD21	0.157711	Ubiquitous	42.2162	41.4456	43.7026	34.4738	17.6247	42.3975	42.7036
chr3	51575160	51702683	+	ENSG00000164080.9	RAD54L2	0.211024	Ubiquitous	6.00429	7.37333	10.0207	7.50084	9.40222	8.26893	8.88707
chr3	12625100	12705725	-	ENSG00000132155.7	RAF1	0.25149	Ubiquitous	31.475	19.3475	37.6556	32.012	25.6884	40.1619	34.1908
chr14	36007558	36278510	-	ENSG00000174373.11	RALGAPA1	0.26109	Ubiquitous	30.886	31.631	26.8464	20.9575	10.3094	27.0831	24.1523
chr20	37101459	37207504	+	ENSG00000170471.10	RALGAPB	0.266509	Ubiquitous	13.6342	14.2047	18.9812	13.2028	6.45501	18.7649	17.2738
chr20	32581452	32696114	+	ENSG00000125970.7	RALY	0.297686	Ubiquitous	35.1677	17.2944	37.5167	34.0508	14.0374	40.2629	31.5963
chr12	131356424	131362223	+	ENSG00000132341.7	RAN	0.174855	Ubiquitous	49.6031	45.3656	39.5778	46.0969	22.0772	43.4321	49.0286
chr22	20103461	20114878	+	ENSG00000099901.12	RANBP1	0.246815	Ubiquitous	23.0406	17.3922	16.6194	18.9651	18.1359	17.6015	15.4089
chr2	109335937	109402267	+	ENSG00000153201.11	RANBP2	0.261844	Ubiquitous	26.9619	20.3176	25.6214	22.5653	13.0921	29.6254	22.6505
chr19	5916150	5978153	-	ENSG00000031823.10	RANBP3	0.259698	Ubiquitous	13.1994	14.567	17.9201	19.5131	8.37055	17.3696	15.2471
chr6	88224096	88299721	-	ENSG00000146282.13	RARS2	0.26154	Ubiquitous	16.2673	7.66931	15.8121	12.1057	9.16621	13.0252	14.298
chr1	33116743	33151812	+	ENSG00000162521.14	RBBP4	0.297805	Ubiquitous	14.8598	20.1669	25.0411	20.506	11.6161	27.8408	25.108
chr16	24549014	24584184	+	ENSG00000122257.14	RBBP6	0.229854	Ubiquitous	24.7017	17.7303	25.0754	23.6097	13.6213	27.5308	22.4781
chr1	110881128	110889299	+	ENSG00000162775.10	RBM15	0.198387	Ubiquitous	7.86186	5.91853	9.98196	8.7458	6.7909	10.1872	9.69817
chr5	150070356	150080669	-	ENSG00000086589.7	RBM22	0.293585	Ubiquitous	12.2349	11.9095	17.3426	12.0618	7.56712	16.8592	12.874
chr13	79885962	79980612	-	ENSG00000139746.11	RBM26	0.241211	Ubiquitous	17.9436	22.7849	23.5447	16.6773	9.52007	22.2073	18.0595
chr5	145583113	145718814	+	ENSG00000091009.6	RBM27	0.222814	Ubiquitous	10.5461	7.69381	10.1304	9.97335	5.27661	11.3537	9.32345
chr20	34291531	34330234	-	ENSG00000131051.16	RBM39	0.280333	Ubiquitous	105.825	71.4661	121.071	90.5039	68.3029	127.937	95.2644
chr11	66384097	66434153	+	ENSG00000173933.15	RBM4	0.2885	Ubiquitous	30.9216	26.9321	37.1483	33.8022	15.8218	42.4183	36.4577
chr19	36119932	36128588	+	ENSG00000126254.7	RBM42	0.289516	Ubiquitous	11.5712	10.3357	17.6329	19.8638	11.7407	18.6054	14.7915
chr3	50126341	50156454	+	ENSG00000003756.12	RBM5	0.298878	Ubiquitous	44.0542	41.298	56.937	35.9746	28.1015	60.7279	49.1006
chr11	114270752	114284925	+	ENSG00000076053.6	RBM7	0.274851	Ubiquitous	8.54293	4.81714	11.1498	8.82357	6.9756	9.34698	10.0054
chr4	26165077	26436541	+	ENSG00000168214.16	RBPJ	0.283418	Ubiquitous	25.2031	30.4841	34.7423	29.3048	10.0533	26.3287	28.0003
chr1	173900352	173991435	-	ENSG00000135870.7	RC3H1	0.24858	Ubiquitous	14.682	8.50909	14.237	12.0167	6.48002	12.4991	12.4523
chr9	125606835	125667620	-	ENSG00000056586.11	RC3H2	0.210396	Ubiquitous	16.2013	17.3312	18.2193	13.6758	8.44334	15.1405	15.5242
chr11	31833939	32127301	+	ENSG00000049449.4	RCN1	0.20432	Ubiquitous	16.8458	11.5521	24.2783	23.1044	21.7604	23.1701	19.4739
chr11	65421067	65430565	-	ENSG00000173039.14	RELA	0.246696	Ubiquitous	19.8663	11.2977	23.0151	23.0532	15.2787	18.5655	16.1734
chr6	139224630	139309398	-	ENSG00000135597.14	REPS1	0.298086	Ubiquitous	17.59	18.2643	13.5271	9.75155	10.8158	14.2751	10.9602
chr1	2323267	2336883	+	ENSG00000157916.14	RER1	0.199323	Ubiquitous	34.4145	17.2253	31.1525	24.1225	27.837	33.2892	34.979
chr1	8412457	8877702	-	ENSG00000142599.13	RERE	0.227815	Ubiquitous	27.4155	36.2535	30.9145	34.0067	11.2847	35.3681	28.9771
chr6	111620234	111804918	-	ENSG00000009413.11	REV3L	0.284089	Ubiquitous	13.537	11.0489	15.0663	12.3866	4.96827	10.4193	12.3569
chr11	114310108	114321001	+	ENSG00000076043.5	REXO2	0.265804	Ubiquitous	24.0617	11.8606	19.9558	23.0537	11.3776	15.7013	24.0472
chr4	39289076	39367995	-	ENSG00000035928.10	RFC1	0.203514	Ubiquitous	15.1078	11.5797	15.2627	11.0627	9.8132	15.6151	11.7974
chr1	175913967	176176629	-	ENSG00000143207.15	RFWD2	0.246658	Ubiquitous	15.3846	11.7369	18.2975	13.3768	10.1502	16.1989	18.8372
chr1	151313116	151319833	-	ENSG00000143390.13	RFX5	0.246329	Ubiquitous	12.2408	10.7556	17.2574	17.2604	5.21654	17.0899	15.4917
chr2	111271389	111334762	-	ENSG00000183054.7	RGPD6	0.286466	Ubiquitous	10.9799	14.2784	15.3924	8.99306	6.38001	15.2261	10.0404
chr2	113127669	113192065	-	ENSG00000169629.7	RGPD8	0.267597	Ubiquitous	7.96826	9.97269	11.1023	7.04606	5.10089	10.8987	7.80146
chr7	151163098	151217206	-	ENSG00000106615.5	RHEB	0.146053	Ubiquitous	21.1503	22.0311	21.5037	22.723	10.7927	21.3471	19.6003
chr17	30469473	30580393	+	ENSG00000126858.12	RHOT1	0.271726	Ubiquitous	12.8128	17.418	17.7209	13.2913	6.44792	15.1095	12.3547
chr16	718086	724174	+	ENSG00000140983.9	RHOT2	0.255373	Ubiquitous	16.0952	19.0644	21.6025	22.2016	15.5939	26.2722	22.8204
chr5	38938021	39074510	-	ENSG00000164327.8	RICTOR	0.285815	Ubiquitous	15.4802	18.1664	21.4862	14.598	9.46891	17.3026	17.0547
chr2	152266397	152364527	+	ENSG00000080345.13	RIF1	0.205231	Ubiquitous	16.5672	15.7626	16.9967	11.4403	7.21244	15.488	14.5802
chr6	3064225	3115421	+	ENSG00000137275.9	RIPK1	0.218511	Ubiquitous	9.55614	3.37392	10.4068	10.4602	7.3634	9.76687	10.8612
chrX	73805052	73834452	-	ENSG00000131263.8	RLIM	0.255864	Ubiquitous	11.5841	15.4381	14.4257	11.0602	5.98944	14.3567	11.5123
chr11	65482367	65488418	-	ENSG00000172922.4	RNASEH2C	0.26123	Ubiquitous	4.80559	9.82168	11.9188	12.9852	7.48595	11.2086	12.3176
chr12	120971283	121015397	+	ENSG00000022840.11	RNF10	0.165159	Ubiquitous	38.6785	26.085	39.1979	37.5768	22.3653	33.5859	38.0527
chr15	59157374	59389618	+	ENSG00000157450.11	RNF111	0.236073	Ubiquitous	10.4849	11.3472	12.2764	8.6742	6.15641	10.8245	8.78228
chr20	48552948	48570429	+	ENSG00000124226.7	RNF114	0.278336	Ubiquitous	12.6379	11.9833	23.7913	16.0426	15.7698	23.963	23.5346
chr3	49726932	49758962	+	ENSG00000164068.11	RNF123	0.248864	Ubiquitous	4.90285	8.51913	9.77593	7.76979	11.0326	9.41866	9.33565
chr19	647526	663277	-	ENSG00000070423.13	RNF126	0.0963524	Ubiquitous	11.9783	12.7017	12.864	13.743	13.0396	11.2891	12.6406
chr8	125486979	125500155	+	ENSG00000170881.4	RNF139	0.214333	Ubiquitous	11.8393	9.01462	14.0871	10.7831	9.31401	12.1819	14.2596
chr17	4843303	4848517	+	ENSG00000108523.11	RNF167	0.228914	Ubiquitous	20.9756	21.0689	25.1541	26.3598	21.0434	30.2494	25.3478
chr2	85822848	85824736	+	ENSG00000168894.5	RNF181	0.179217	Ubiquitous	25.339	15.8452	25.5203	24.2512	25.602	27.5711	19.2216
chr9	104296133	104325622	+	ENSG00000155827.7	RNF20	0.282103	Ubiquitous	14.8284	11.8173	12.0224	10.6744	5.00868	12.9119	11.4367
chr4	2463947	2627047	+	ENSG00000063978.11	RNF4	0.247692	Ubiquitous	12.9501	20.7855	27.1437	23.2981	13.2684	26.4798	27.4545
chr12	56598285	56615717	-	ENSG00000181852.13	RNF41	0.264832	Ubiquitous	8.44752	14.326	14.7602	11.9699	5.08879	13.5028	11.7725
chr5	175953698	175965026	-	ENSG00000146083.7	RNF44	0.200768	Ubiquitous	14.9712	14.1397	15.7437	11.0761	6.224	15.7454	13.3508
chr13	26706253	26796791	-	ENSG00000127870.12	RNF6	0.239848	Ubiquitous	5.97342	10.9923	10.5767	9.08103	4.86309	8.93766	10.7029
chr16	2303117	2318413	-	ENSG00000205937.7	RNPS1	0.256993	Ubiquitous	21.3765	43.9222	38.3842	38.1957	16.5125	42.5591	38.7789
chr17	1732996	1803376	+	ENSG00000132383.7	RPA1	0.27623	Ubiquitous	11.9515	7.11936	11.9371	11.8355	6.00386	14.1635	12.6592
chr17	5322961	5336196	+	ENSG00000129197.10	RPAIN	0.176183	Ubiquitous	10.9549	12.2393	11.3721	8.38376	7.42802	12.1573	10.2016
chr2	210867289	210886300	+	ENSG00000197713.10	RPE	0.190761	Ubiquitous	15.6676	18.8323	19.1102	15.9173	10.3951	20.2894	18.5914
chr19	49990811	49995565	+	ENSG00000142541.12	RPL13A	0.294867	Ubiquitous	585.76	161.321	478.67	679.84	405.501	604.753	640.26
chr3	23958036	23965183	+	ENSG00000174748.14	RPL15	0.270453	Ubiquitous	309.94	154.256	256.926	255.508	155.746	328.743	306.623
chr19	17970685	17974962	+	ENSG00000105640.8	RPL18A	0.273572	Ubiquitous	298.928	68.9068	246.833	321.012	163.825	303.115	321.807
chr22	39708887	39716394	-	ENSG00000100316.11	RPL3	0.287167	Ubiquitous	571.811	175.302	403.494	507.935	385.557	506.203	467.147
chr6	42847356	42857663	+	ENSG00000146223.10	RPL7L1	0.260266	Ubiquitous	19.6049	23.7182	25.6305	21.5353	18.7865	30.4922	26.0613
chr3	58291974	58310422	+	ENSG00000163684.7	RPP14	0.284527	Ubiquitous	5.19424	6.5667	7.17103	8.30475	7.49175	8.66572	10.1085
chr20	36661948	36720768	+	ENSG00000101413.7	RPRD1B	0.283873	Ubiquitous	7.12957	7.29015	11.31	9.21569	9.4316	12.8673	10.9107
chr1	150335567	150449042	+	ENSG00000163125.11	RPRD2	0.24281	Ubiquitous	9.42757	11.1839	9.51785	10.1022	4.4256	11.6027	8.05574
chr15	63418071	63450220	-	ENSG00000185088.8	RPS27L	0.28498	Ubiquitous	22.1674	6.7617	15.032	21.1084	18.4479	15.1546	18.5963
chr17	78518619	78940171	+	ENSG00000141564.9	RPTOR	0.215262	Ubiquitous	8.02788	10.7748	12.7903	13.0286	6.30361	11.6701	11.7774
chr2	219433303	219461803	+	ENSG00000144580.9	RQCD1	0.254547	Ubiquitous	13.7551	12.6921	17.6026	12.6215	8.27648	15.1085	16.2775
chr9	19049372	19051019	+	ENSG00000155876.4	RRAGA	0.140064	Ubiquitous	20.9449	26.4405	27.5749	25.5456	17.2286	25.4614	26.6548
chr1	39303870	39325495	-	ENSG00000116954.7	RRAGC	0.295852	Ubiquitous	13.0164	7.18714	12.2822	10.0588	5.12597	8.60086	11.7378
chr16	15153879	15188174	-	ENSG00000085721.8	RRN3	0.274867	Ubiquitous	9.4302	9.77443	12.6045	10.6479	10.535	12.8449	15.1321
chr7	77325760	77412339	+	ENSG00000187257.10	RSBN1L	0.227124	Ubiquitous	8.21522	6.36054	10.554	9.17884	4.5662	10.4309	10.19
chr1	100731763	100758325	+	ENSG00000137996.8	RTCA	0.277643	Ubiquitous	11.9921	8.47839	9.61308	9.0109	6.098	8.95033	9.82492
chr15	41700606	41775761	+	ENSG00000137815.10	RTF1	0.226339	Ubiquitous	12.2609	10.2725	9.87943	10.8449	5.44567	10.3046	10.1676
chr20	55043647	55093943	+	ENSG00000022277.8	RTFDC1	0.198255	Ubiquitous	19.0001	25.0865	28.0811	30.2081	15.8216	28.1051	29.2208
chr5	178977559	179037027	+	ENSG00000176783.10	RUFY1	0.226589	Ubiquitous	16.72	9.25123	16.2562	13.8156	7.54488	16.1873	14.5335
chr19	49496705	49519252	+	ENSG00000183207.8	RUVBL2	0.251077	Ubiquitous	12.7037	9.94636	12.2676	11.8008	9.77452	15.6525	13.8421
chr6	116892530	116918838	+	ENSG00000111832.8	RWDD1	0.25419	Ubiquitous	11.9626	11.1979	9.31167	11.8675	4.33063	8.08993	8.7331
chr22	44351301	44406411	+	ENSG00000100347.10	SAMM50	0.178871	Ubiquitous	12.9898	11.2219	12.3157	13.3834	10.0116	12.9874	14.7987
chr13	21714653	21723221	+	ENSG00000150459.8	SAP18	0.292961	Ubiquitous	27.4749	24.2574	19.5742	21.1521	12.2614	20.9255	18.3845
chr17	73663196	73704142	+	ENSG00000161526.10	SAP30BP	0.189541	Ubiquitous	16.6179	18.1568	19.6477	16.7076	9.47204	18.7412	15.8465
chr1	109756540	109780791	+	ENSG00000031698.8	SARS	0.169874	Ubiquitous	38.9473	38.769	35.9381	33.2925	24.3162	41.4474	35.1764
chr12	108916357	108955176	-	ENSG00000075856.7	SART3	0.224621	Ubiquitous	14.9563	12.7855	15.849	12.1658	7.95449	16.5731	13.3914
chr20	34541539	34547394	-	ENSG00000171222.6	SCAND1	0.212283	Ubiquitous	12.0316	9.25046	12.0897	12.2188	13.3839	15.149	12.6241
chr3	47455203	47518616	-	ENSG00000114650.14	SCAP	0.241728	Ubiquitous	16.987	18.444	23.044	18.7739	26.544	23.8067	28.0461
chr17	10583654	10601692	-	ENSG00000133028.6	SCO1	0.171919	Ubiquitous	11.3201	6.69058	8.16929	9.71003	10.3585	10.09	11.2254
chr11	65292548	65306175	+	ENSG00000142186.12	SCYL1	0.207627	Ubiquitous	9.96672	15.9815	19.7227	19.9304	20.2053	22.2708	20.074
chr4	76862103	76912115	-	ENSG00000198301.7	SDAD1	0.279772	Ubiquitous	10.4472	8.19471	8.19162	9.09685	5.35904	11.697	9.25749
chr9	139296377	139305061	-	ENSG00000165689.12	SDCCAG3	0.2809	Ubiquitous	6.26924	7.95871	9.19298	8.0125	12.716	12.3375	11.0933
chr17	26975374	26989207	-	ENSG00000132581.5	SDF2	0.297779	Ubiquitous	9.29148	9.06941	17.4954	13.995	10.8933	18.4519	18.7966
chr1	1152288	1167411	-	ENSG00000078808.12	SDF4	0.260465	Ubiquitous	16.7444	25.0971	44.4988	41.1558	43.7941	48.5558	44.1623
chr11	61197514	61215001	+	ENSG00000167985.2	SDHAF2	0.265877	Ubiquitous	6.97494	8.76157	11.0333	10.4411	7.32002	12.7091	11.4494
chr3	10334815	10362862	-	ENSG00000157020.13	SEC13	0.234261	Ubiquitous	15.6713	15.617	27.0618	30.015	21.3655	30.3426	29.6764
chr9	139334549	139372141	-	ENSG00000148396.14	SEC16A	0.19432	Ubiquitous	16.0165	12.6844	22.3826	20.4329	17.1206	20.8458	21.0988
chr10	121652223	121702014	+	ENSG00000107651.8	SEC23IP	0.229561	Ubiquitous	10.7941	7.39841	12.9683	12.8436	7.63703	14.1316	14.2285
chr5	133984479	134063513	+	ENSG00000113615.8	SEC24A	0.290345	Ubiquitous	9.0429	5.12102	8.11262	10.1575	12.4027	9.53936	10.8363
chr4	110354928	110462052	+	ENSG00000138802.7	SEC24B	0.169135	Ubiquitous	14.9986	9.85122	15.1719	13.0512	16.1595	14.2333	13.252
chr10	75504120	75531919	+	ENSG00000176986.10	SEC24C	0.241219	Ubiquitous	19.0871	14.4583	25.7847	20.3299	14.3493	26.2045	25.2916
chr4	83739814	83822319	-	ENSG00000138674.12	SEC31A	0.232876	Ubiquitous	55.7636	23.1246	52.4184	51.8671	37.6673	59.2178	51.7232
chr18	12947132	12987535	+	ENSG00000085415.11	SEH1L	0.206462	Ubiquitous	10.5868	13.0368	11.5437	8.20553	9.04797	10.8636	11.8233
chr14	81937893	82000205	-	ENSG00000071537.9	SEL1L	0.232799	Ubiquitous	21.4018	17.8873	29.9364	28.2422	29.2616	30.446	34.1448
chr3	150320662	150348222	+	ENSG00000198843.8	SELT	0.261735	Ubiquitous	15.5593	24.1439	20.7512	17.8182	11.6601	21.8111	19.3475
chr3	185300284	185351339	+	ENSG00000163904.8	SENP2	0.217665	Ubiquitous	11.5149	12.4422	11.1892	8.33658	6.02476	12.052	9.28634
chr17	7465192	7475287	+	ENSG00000161956.8	SENP3	0.213655	Ubiquitous	9.21214	13.8571	12.7764	11.9439	5.39978	12.9899	13.0566
chr3	196594727	196661585	+	ENSG00000119231.6	SENP5	0.225982	Ubiquitous	12.2309	14.2417	15.5599	14.029	7.8709	13.5505	16.6841
chr15	44069285	44094787	+	ENSG00000140264.15	SERF2	0.236756	Ubiquitous	78.9106	37.7476	82.453	96.039	92.4524	99.8732	69.7633
chr3	150259781	150321015	-	ENSG00000120742.6	SERP1	0.274935	Ubiquitous	29.8643	19.3436	35.8755	27.5769	28.4821	39.811	32.0506
chr3	47057919	47205457	-	ENSG00000181555.15	SETD2	0.25532	Ubiquitous	19.5415	15.0764	18.4592	16.2	10.6842	21.8741	17.774
chr14	99864083	99947216	-	ENSG00000183576.8	SETD3	0.265987	Ubiquitous	18.5515	22.668	26.142	25.3466	15.0919	31.0317	28.866
chr3	9439299	9520924	+	ENSG00000168137.11	SETD5	0.198815	Ubiquitous	34.2392	33.8106	39.8877	30.0724	23.2755	37.8551	32.4917
chr19	2236520	2248678	+	ENSG00000104897.5	SF3A2	0.249271	Ubiquitous	12.9545	11.7415	15.3508	15.3999	7.21668	16.7038	12.5767
chr1	38422647	38456593	-	ENSG00000183431.7	SF3A3	0.293551	Ubiquitous	14.0417	7.67494	11.6434	10.951	6.3159	12.0718	10.8613
chr2	198254508	198299815	-	ENSG00000115524.11	SF3B1	0.287448	Ubiquitous	67.031	48.3399	91.1523	61.8153	44.2056	87.1759	81.1368
chr11	65818200	65836779	+	ENSG00000087365.10	SF3B2	0.284731	Ubiquitous	32.8633	31.5667	35.135	36.0824	20.145	41.7782	23.5035
chr1	35641979	35658749	-	ENSG00000116560.6	SFPQ	0.254576	Ubiquitous	76.7279	72.2567	87.6886	64.9289	46.6959	91.6446	61.5865
chr12	132195626	132284282	+	ENSG00000061936.5	SFSWAP	0.241518	Ubiquitous	11.1453	13.6346	12.0186	10.5154	6.00499	13.0084	9.35701
chr8	67624653	67774257	+	ENSG00000104205.8	SGK3	0.297617	Ubiquitous	5.71314	10.0578	9.08486	4.71054	6.26762	8.86032	7.74991
chr1	249104648	249120832	-	ENSG00000175137.9	SH3BP5L	0.214902	Ubiquitous	6.44322	8.46637	9.95678	7.73718	5.03866	9.9523	10.1037
chr8	145153536	145163027	-	ENSG00000179526.12	SHARPIN	0.252105	Ubiquitous	7.9303	8.39108	14.9508	13.6512	9.37855	14.9888	12.9585
chr1	154934774	154946871	-	ENSG00000160691.14	SHC1	0.289536	Ubiquitous	14.9537	6.22206	28.8848	28.6612	18.3439	27.4614	27.4872
chr10	112679301	112773425	+	ENSG00000108061.7	SHOC2	0.238694	Ubiquitous	21.6652	17.2176	19.2087	18.1982	9.16531	21.8867	23.4995
chr10	69644427	69678147	+	ENSG00000096717.7	SIRT1	0.244474	Ubiquitous	7.93891	7.13747	11.2892	9.37148	6.25827	9.91025	10.5594
chr14	105219437	105234831	+	ENSG00000184990.8	SIVA1	0.244141	Ubiquitous	12.2827	7.32311	22.1487	24.1397	22.3776	24.3312	22.0741
chr17	57187312	57232630	-	ENSG00000182628.8	SKA2	0.274571	Ubiquitous	11.3382	12.0922	9.29947	10.517	3.38456	10.6087	7.48421
chr5	54603588	54721409	+	ENSG00000039123.11	SKIV2L2	0.224951	Ubiquitous	19.8666	14.152	17.2285	15.3927	9.9174	18.2387	17.4565
chr5	133484633	133512729	-	ENSG00000113558.14	SKP1	0.235154	Ubiquitous	34.059	49.2403	38.7517	45.0093	24.756	48.9874	34.4039
chr4	1694527	1714282	-	ENSG00000163950.8	SLBP	0.151986	Ubiquitous	10.3213	9.67203	12.2312	11.3401	7.8039	11.3886	11.7074
chr2	113403434	113421404	+	ENSG00000144136.6	SLC20A1	0.203788	Ubiquitous	17.8479	17.8449	19.8304	13.0335	16.4117	11.4168	18.1804
chr17	4840425	4843546	-	ENSG00000108528.9	SLC25A11	0.282088	Ubiquitous	9.04979	15.0148	15.9186	16.0085	14.7263	15.8989	20.1085
chr10	101370282	101380366	-	ENSG00000155287.6	SLC25A28	0.22258	Ubiquitous	14.3655	11.5889	12.8566	13.3081	8.00806	10.5982	10.6485
chr5	110073837	110100857	+	ENSG00000164209.12	SLC25A46	0.252844	Ubiquitous	13.9468	21.7624	17.2329	17.5281	12.5051	17.3559	18.9906
chr9	37879400	37904350	-	ENSG00000122696.8	SLC25A51	0.287627	Ubiquitous	7.0285	10.1245	12.4772	11.0462	3.41466	10.6675	12.8113
chr1	101361632	101447309	+	ENSG00000162695.7	SLC30A7	0.247277	Ubiquitous	7.20336	4.968	10.8449	8.74555	7.23416	10.0042	10.8239
chr4	41992489	42092474	+	ENSG00000014824.9	SLC30A9	0.232428	Ubiquitous	13.7919	15.2218	12.5747	9.9465	6.76704	14.1905	12.8324
chr5	54921673	55069022	-	ENSG00000177058.7	SLC38A9	0.158637	Ubiquitous	9.77615	9.00905	10.1386	6.27532	6.9211	10.1329	9.06693
chr17	70642088	71088851	-	ENSG00000133195.7	SLC39A11	0.293209	Ubiquitous	12.2047	11.0389	10.9965	11.0893	16.2457	18.4586	16.7032
chr14	69864732	69929105	+	ENSG00000029364.7	SLC39A9	0.274084	Ubiquitous	15.6345	16.0469	26.1948	17.1371	22.6768	26.7482	28.5704
chr5	159828648	159848718	-	ENSG00000164609.5	SLU7	0.248961	Ubiquitous	13.2708	12.1596	11.3435	9.21491	5.10354	12.7519	9.22773
chr4	146402346	146479231	+	ENSG00000170365.5	SMAD1	0.269257	Ubiquitous	10.1876	10.047	10.3128	10.4256	8.26523	14.351	13.6832
chr5	135468534	135524435	+	ENSG00000113658.12	SMAD5	0.233544	Ubiquitous	21.6751	13.3062	22.6453	16.8488	11.1432	20.2242	20.9422
chr9	2015342	2193624	+	ENSG00000080503.15	SMARCA2	0.271924	Ubiquitous	30.748	28.4422	32.7275	26.0302	15.6325	35.352	20.8532
chr4	95128762	95212443	+	ENSG00000163104.13	SMARCAD1	0.21712	Ubiquitous	11	10.2783	10.2314	8.01102	4.78043	11.3529	9.02644
chr22	24129150	24176703	+	ENSG00000099956.13	SMARCB1	0.271696	Ubiquitous	15.1097	16.2594	16.6248	18.4965	9.74515	22.0493	20.116
chr3	47626762	47823596	-	ENSG00000173473.6	SMARCC1	0.291139	Ubiquitous	20.4286	10.2049	14.8091	15.6742	7.30391	18.7881	20.1061
chr17	38781214	38804760	-	ENSG00000073584.14	SMARCE1	0.222692	Ubiquitous	19.5865	12.321	21.3825	19.364	9.43321	21.1007	17.919
chr14	91923955	91976898	-	ENSG00000100796.13	SMEK1	0.211163	Ubiquitous	24.416	15.153	28.2133	24.3171	17.1746	24.8617	27.6117
chr2	55774428	55846015	-	ENSG00000138041.11	SMEK2	0.164757	Ubiquitous	27.0778	17.7348	25.7096	25.3482	18.045	27.9609	28.3104
chr16	18816175	18937776	-	ENSG00000157106.12	SMG1	0.216367	Ubiquitous	29.0395	19.0717	28.8082	21.2526	18.2815	30.8412	28.5553
chr1	156219015	156252620	-	ENSG00000198952.7	SMG5	0.261811	Ubiquitous	12.1616	18.7453	19.815	17.5728	13.1788	18.2624	22.5181
chr17	1963133	2207065	-	ENSG00000070366.9	SMG6	0.232981	Ubiquitous	11.0364	9.32764	12.4236	10.1576	4.41908	12.5351	10.3237
chr1	183441351	183567381	+	ENSG00000116698.16	SMG7	0.268383	Ubiquitous	14.2202	17.8003	19.9398	17.6186	11.1479	22.4726	17.9212
chrX	21958691	22025798	+	ENSG00000102172.11	SMS	0.235039	Ubiquitous	17.5983	18.5569	17.9267	23.3935	9.89478	24.1576	23.5074
chr9	33041762	33076665	-	ENSG00000122692.7	SMU1	0.185351	Ubiquitous	7.93451	8.842	9.82947	8.79472	5.14369	10.1686	9.15852
chr1	153631130	153634306	+	ENSG00000143553.6	SNAPIN	0.233878	Ubiquitous	7.53135	10.9265	13.3983	12.1995	7.40427	13.8258	12.0935
chr7	127292234	127732661	+	ENSG00000197157.6	SND1	0.247394	Ubiquitous	32.3062	20.3282	39.1788	38.8137	33.4775	46.1851	44.4506
chr17	47006678	47022479	-	ENSG00000159210.5	SNF8	0.274577	Ubiquitous	12.2176	12.8355	18.7068	17.9086	12.7254	21.4657	19.0364
chr2	96940074	96971297	-	ENSG00000144028.10	SNRNP200	0.236784	Ubiquitous	26.0179	23.418	34.7324	30.6604	21.1832	37.7066	36.6574
chr1	31732417	31769662	-	ENSG00000060688.8	SNRNP40	0.247747	Ubiquitous	14.0091	10.1959	15.3364	12.7743	7.04828	16.4881	15.0555
chr15	101821715	101835487	-	ENSG00000131876.12	SNRPA1	0.162888	Ubiquitous	12.3582	8.81061	12.6795	11.7353	7.38099	11.6357	11.764
chr6	34725183	34741571	+	ENSG00000124562.5	SNRPC	0.277902	Ubiquitous	16.666	9.03681	11.584	15.4865	11.4542	14.059	10.5862
chrX	70279094	70288273	-	ENSG00000147164.7	SNX12	0.225094	Ubiquitous	11.4446	15.5395	16.2203	17.552	6.95946	18.0371	18.4437
chr7	17830385	17980124	-	ENSG00000071189.17	SNX13	0.215547	Ubiquitous	13.325	16.4029	17.0683	12.2406	7.38416	16.5966	17.6381
chr6	86215214	86303874	-	ENSG00000135317.8	SNX14	0.245751	Ubiquitous	18.6577	21.529	27.1039	17.9876	17.7792	24.7704	21.9345
chr2	27593389	27599995	+	ENSG00000115234.6	SNX17	0.272754	Ubiquitous	18.8534	23.8505	41.7166	31.9913	25.7439	40.4587	41.1319
chr11	130745331	130786404	-	ENSG00000120451.6	SNX19	0.273286	Ubiquitous	13.7192	23.0937	25.5644	21.6549	11.3338	25.3104	27.6763
chr16	12070594	12668146	+	ENSG00000048471.9	SNX29	0.293043	Ubiquitous	9.3889	7.76412	10.8052	7.51865	3.04632	10.0053	8.10961
chr6	108532426	108582464	-	ENSG00000112335.10	SNX3	0.160865	Ubiquitous	42.8182	40.9255	42.5184	37.9527	25.3847	32.9375	35.8629
chr2	46926091	46990268	+	ENSG00000171150.7	SOCS5	0.26446	Ubiquitous	8.56912	8.64583	11.8027	9.93999	3.86436	9.33242	11.7366
chr2	39208537	39351486	-	ENSG00000115904.8	SOS1	0.183383	Ubiquitous	12.8443	11.1514	13.9449	12.8691	5.67039	13.7142	12.0767
chr14	50583847	50698276	-	ENSG00000100485.7	SOS2	0.246565	Ubiquitous	15.1221	12.4582	16.9608	12.4475	5.96813	15.5774	15.1001
chr12	53773960	53810230	+	ENSG00000185591.5	SP1	0.271867	Ubiquitous	23.6361	9.24088	27.0735	26.6569	10.8359	21.9716	25.9375
chr12	49760367	49921205	+	ENSG00000123352.13	SPATS2	0.260737	Ubiquitous	7.30212	9.46821	7.06664	8.43736	2.57544	10.0871	9.89216
chr3	52738971	52742182	+	ENSG00000114902.9	SPCS1	0.286819	Ubiquitous	20.6002	22.5897	21.5272	32.5279	27.9343	33.9085	19.9179
chr1	16174359	16266955	+	ENSG00000065526.6	SPEN	0.23395	Ubiquitous	20.1926	17.5222	18.4175	14.7088	10.2024	18.6824	13.2777
chr15	65255362	65282648	-	ENSG00000090487.6	SPG21	0.286559	Ubiquitous	22.3837	15.2182	38.5404	27.4065	35.1022	40.4158	34.3545
chr2	139259371	139331117	+	ENSG00000144228.4	SPOPL	0.295496	Ubiquitous	6.17634	7.46793	12.1855	11.648	5.47492	8.93042	12.2742
chr5	179233388	179265078	+	ENSG00000161011.15	SQSTM1	0.230225	Ubiquitous	95.3209	52.2572	129.235	137.595	145.367	143.404	113.585
chr16	30709530	30755602	+	ENSG00000080603.12	SRCAP	0.231033	Ubiquitous	16.7804	19.0128	21.205	22.5187	9.49052	23.18	17.9403
chr15	40327940	40331389	-	ENSG00000140319.6	SRP14	0.290441	Ubiquitous	44.7571	30.882	31.855	41.7702	22.2311	45.7058	23.0904
chr14	35451163	35498773	+	ENSG00000100883.7	SRP54	0.166991	Ubiquitous	18.9079	14.1988	19.9814	17.9485	18.9818	21.7486	18.6821
chr17	74035184	74068734	-	ENSG00000167881.10	SRP68	0.216152	Ubiquitous	21.267	17.6514	23.3029	21.4172	13.133	25.6705	23.9594
chr1	225965531	225978168	+	ENSG00000143742.8	SRP9	0.235807	Ubiquitous	33.8292	68.2406	64.7178	56.3632	58.0127	67.5967	76.0628
chr3	133502877	133544616	+	ENSG00000144867.7	SRPRB	0.277485	Ubiquitous	10.7508	7.58374	7.50014	7.51894	9.9614	12.558	11.1251
chr1	24958207	24999758	+	ENSG00000133226.12	SRRM1	0.250384	Ubiquitous	33.1327	30.1438	27.3805	27.4939	13.7731	28.9973	21.2322
chr16	2802330	2822539	+	ENSG00000167978.12	SRRM2	0.199993	Ubiquitous	90.9521	79.267	86.0035	79.6966	64.3508	96.1573	61.2893
chr17	56080721	56084707	-	ENSG00000136450.8	SRSF1	0.256652	Ubiquitous	41.3757	37.8445	54.1554	54.1833	33.9503	63.9417	64.0012
chr1	70671365	70718735	+	ENSG00000116754.9	SRSF11	0.241588	Ubiquitous	48.2869	45.4192	58.0636	41.0699	35.943	61.6221	51.6269
chr17	74730197	74733456	-	ENSG00000161547.10	SRSF2	0.297489	Ubiquitous	19.0085	29.284	44.3002	37.402	29.4597	47.5725	41.0668
chr18	23596578	23671181	-	ENSG00000141380.9	SS18	0.29747	Ubiquitous	30.8155	17.167	28.2472	23.2764	18.0821	33.6479	24.2437
chr5	80708840	81047616	-	ENSG00000145687.11	SSBP2	0.289613	Ubiquitous	14.5181	12.1292	12.2668	14.4179	1.61251	11.4025	10.0517
chr9	140083099	140084822	+	ENSG00000176101.7	SSNA1	0.286274	Ubiquitous	5.63989	9.45028	12.1618	13.6205	8.71214	11.029	11.3346
chr6	7268539	7347679	-	ENSG00000124783.8	SSR1	0.299804	Ubiquitous	13.6096	19.4874	20.0138	20.1657	14.705	26.3127	22.563
chr11	65337901	65341413	+	ENSG00000173465.3	SSSCA1	0.227335	Ubiquitous	7.20715	8.05535	8.36201	8.93868	7.29588	10.2762	7.78126
chr1	1477053	1510249	-	ENSG00000160075.10	SSU72	0.284267	Ubiquitous	33.0491	22.1718	32.8454	28.048	21.4454	38.2699	26.7865
chr22	41220539	41253026	-	ENSG00000100380.8	ST13	0.19128	Ubiquitous	40.7703	37.9139	36.8667	40.2125	39.887	47.4042	34.37
chr3	136055077	136471220	-	ENSG00000118007.8	STAG1	0.252375	Ubiquitous	18.7023	9.85168	20.4814	15.4658	8.61754	20.802	20.1938
chr2	152973315	153032506	-	ENSG00000115145.5	STAM2	0.273775	Ubiquitous	11.1737	8.76901	13.4971	10.1456	5.22078	11.4961	12.0066
chr20	47729878	47804904	-	ENSG00000124214.15	STAU1	0.229271	Ubiquitous	26.828	17.7621	22.6859	27.9684	32.2551	30.4135	23.5017
chr11	63952744	63972015	+	ENSG00000168439.12	STIP1	0.245454	Ubiquitous	21.8582	20.0517	17.3746	23.8375	10.4113	22.0792	16.144
chr19	1189406	1228428	+	ENSG00000118046.10	STK11	0.255963	Ubiquitous	10.0459	10.9662	16.119	16.2123	11.0559	17.7726	18.4067
chr1	36805225	36851497	-	ENSG00000196182.6	STK40	0.268335	Ubiquitous	13.5749	6.72518	19.7474	19.7729	13.6862	14.061	19.0081
chr12	16035325	16056412	+	ENSG00000023734.6	STRAP	0.189652	Ubiquitous	25.6411	35.7002	28.0952	29.6495	22.5117	34.674	33.0057
chr1	110574199	110617263	+	ENSG00000143093.10	STRIP1	0.181061	Ubiquitous	11.9574	12.4688	14.0972	11.3336	6.14538	13.533	13.8301
chr14	31363005	31495607	-	ENSG00000196792.7	STRN3	0.263959	Ubiquitous	19.6818	12.8832	13.9557	18.9209	10.4359	12.0796	18.6441
chr19	47222764	47250251	-	ENSG00000090372.10	STRN4	0.207867	Ubiquitous	17.3649	18.3603	20.4015	18.7728	8.25056	16.2838	17.9321
chr3	31574130	31679112	+	ENSG00000163527.5	STT3B	0.291753	Ubiquitous	36.0476	18.9326	45.1467	29.2794	25.7196	47.1762	45.3485
chr16	730224	732870	+	ENSG00000103266.6	STUB1	0.270932	Ubiquitous	11.6493	33.2794	30.8979	30.4596	21.8618	35.8577	28.7083
chr20	57226328	57254582	+	ENSG00000124222.17	STX16	0.245357	Ubiquitous	7.43292	19.471	20.4663	16.6701	10.6671	20.5805	18.4782
chr9	102668915	102732618	+	ENSG00000136874.6	STX17	0.210227	Ubiquitous	14.3228	10.6526	18.9419	14.94	12.9597	18.6212	18.2626
chr4	4417469	4544073	-	ENSG00000168818.5	STX18	0.245704	Ubiquitous	8.27513	8.38509	8.90987	10.5563	5.56746	8.12204	8.51589
chr16	31044210	31054296	+	ENSG00000103496.10	STX4	0.216532	Ubiquitous	15.0196	11.2436	14.8647	13.7599	8.93741	11.953	9.84552
chr1	180941861	180992047	-	ENSG00000135823.9	STX6	0.274936	Ubiquitous	12.4942	12.2104	12.4331	7.30163	3.3818	10.8265	8.20105
chr1	109289296	109352148	+	ENSG00000116266.6	STXBP3	0.169777	Ubiquitous	24.5101	23.5828	22.4006	18.7945	10.1186	23.2437	23.9531
chr13	48510622	48612125	-	ENSG00000136143.9	SUCLA2	0.28582	Ubiquitous	15.9656	19.8497	12.8564	15.7142	7.54224	16.2584	16.7207
chr12	118814185	118855840	+	ENSG00000111707.7	SUDS3	0.291769	Ubiquitous	13.7413	11.5597	13.0495	13.9192	6.00949	17.8763	17.6841
chr19	19386827	19431653	-	ENSG00000105705.11	SUGP1	0.278629	Ubiquitous	9.09444	9.34258	6.96533	7.63982	4.76076	10.1944	6.32048
chr2	203070903	203103331	-	ENSG00000116030.12	SUMO1	0.216911	Ubiquitous	16.8491	26.4107	22.4086	22.3677	23.0014	28.212	21.5177
chr21	46225532	46238694	-	ENSG00000184900.11	SUMO3	0.287897	Ubiquitous	18.3637	25.3886	30.2861	21.5068	13.3835	26.8436	23.915
chr7	855528	936072	+	ENSG00000164828.13	SUN1	0.277582	Ubiquitous	37.0565	29.5849	53.7848	46.7539	20.0119	50.6993	49.0241
chr14	21819631	21852425	-	ENSG00000092201.5	SUPT16H	0.193193	Ubiquitous	21.2997	16.3375	18.2792	19.2777	7.62829	21.106	20.4799
chr13	37583449	37633850	-	ENSG00000102710.15	SUPT20H	0.29605	Ubiquitous	18.7774	15.1449	25.9032	19.1318	9.85969	25.9556	20.8117
chr17	56422539	56430454	-	ENSG00000213246.2	SUPT4H1	0.145354	Ubiquitous	16.1296	12.8226	15.4947	14.1865	10.3673	14.6987	15.141
chr19	39926796	39967310	+	ENSG00000196235.9	SUPT5H	0.258555	Ubiquitous	19.4644	23.1744	24.0819	24.5053	14.811	29.2282	23.9896
chr17	26989109	27029697	+	ENSG00000109111.10	SUPT6H	0.183051	Ubiquitous	20.2478	18.7649	23.526	23.258	13.2626	20.7175	19.0662
chr9	136228325	136242970	-	ENSG00000148248.9	SURF4	0.277753	Ubiquitous	11.5855	10.6349	23.7482	19.683	27.1666	25.7533	26.3211
chrX	16737755	16783459	+	ENSG00000169895.5	SYAP1	0.169445	Ubiquitous	10.5371	5.30636	8.78869	9.4689	9.82586	8.95372	10.1662
chr19	46318668	46366548	-	ENSG00000125755.14	SYMPK	0.246929	Ubiquitous	13.2261	14.2064	16.4771	13.4649	11.3883	18.5122	14.8831
chr17	35874900	35969544	-	ENSG00000006114.11	SYNRG	0.28639	Ubiquitous	12.9716	12.1408	18.2119	12.4035	8.90519	15.8175	15.7388
chr1	43855553	43918321	+	ENSG00000198198.9	SZT2	0.267541	Ubiquitous	10.5778	9.75373	12.3793	9.64565	4.91306	13.0511	10.0871
chr22	39795746	39833065	+	ENSG00000100324.9	TAB1	0.207251	Ubiquitous	5.53837	11.2311	11.0932	10.4451	5.53524	10.5045	10.3041
chr6	149539777	149732749	+	ENSG00000055208.13	TAB2	0.260258	Ubiquitous	19.5267	22.9212	27.0014	32.2085	16.4671	25.7022	31.3373
chr3	9821544	9834695	-	ENSG00000171148.9	TADA3	0.266475	Ubiquitous	13.0456	19.5294	22.4726	24.5153	13.0592	26.2653	22.9755
chrX	70586114	70752224	+	ENSG00000147133.11	TAF1	0.270185	Ubiquitous	13.5766	10.2051	12.5545	11.6347	6.12593	14.9016	11.1554
chr11	93463114	93517557	-	ENSG00000166012.10	TAF1D	0.236295	Ubiquitous	29.2387	25.6444	32.317	25.4668	23.1219	33.6052	36.9676
chr8	120743015	120845103	-	ENSG00000064313.7	TAF2	0.235561	Ubiquitous	10.3099	7.47741	9.35212	8.25913	4.75597	8.89636	8.54667
chr5	140698057	140700330	-	ENSG00000178913.5	TAF7	0.19384	Ubiquitous	25.8194	16.9586	24.1014	23.6666	13.0132	24.3659	22.7817
chr1	11072414	11085796	+	ENSG00000120948.11	TARDBP	0.242707	Ubiquitous	42.5617	42.0569	44.0535	37.4297	21.2567	50.5494	42.3255
chr8	125500726	125551699	-	ENSG00000147687.12	TATDN1	0.284641	Ubiquitous	13.5795	11.315	9.88724	8.0899	6.55104	13.7509	9.59851
chr22	30687979	30723035	-	ENSG00000099992.11	TBC1D10A	0.214918	Ubiquitous	10.9155	6.17676	11.4645	8.24127	6.44402	11.1701	11.0558
chr4	6910969	7034845	+	ENSG00000132405.14	TBC1D14	0.226976	Ubiquitous	14.7503	18.3709	17.9786	14.1129	8.73894	14.6872	19.1108
chr12	72233487	72320629	+	ENSG00000121749.11	TBC1D15	0.290082	Ubiquitous	21.0795	16.629	22.5865	13.8407	13.4885	16.883	14.2868
chr19	50380682	50392005	+	ENSG00000104946.6	TBC1D17	0.273765	Ubiquitous	10.0304	16.2765	17.3392	15.2727	10.0462	18.6775	12.4206
chr5	179289066	179334859	-	ENSG00000197226.8	TBC1D9B	0.255865	Ubiquitous	19.8931	32.432	32.4575	22.0798	22.1598	35.7558	30.6204
chr15	57210821	57591479	+	ENSG00000140262.13	TCF12	0.217541	Ubiquitous	22.0096	28.2392	27.7391	24.7597	12.9857	22.4	22.6821
chr16	89940000	89977792	+	ENSG00000141002.14	TCF25	0.289862	Ubiquitous	34.4638	42.4005	45.7781	45.4054	31.7563	58.6546	50.113
chr6	160199530	160210781	-	ENSG00000120438.7	TCP1	0.225455	Ubiquitous	36.4041	36.6088	39.5772	38.199	28.6891	40.9079	47.4227
chr12	104359582	104382652	+	ENSG00000139372.10	TDG	0.224251	Ubiquitous	11.0429	6.11095	10.1224	8.64301	5.03055	10.8873	10.6051
chr8	73921099	73960357	+	ENSG00000147601.9	TERF1	0.225179	Ubiquitous	10.09	10.612	8.44172	9.1831	4.50174	9.59483	7.5232
chr9	35605367	35610038	+	ENSG00000107140.11	TESK1	0.24709	Ubiquitous	6.441	10.4667	10.5699	12.1908	5.6296	11.3202	10.6441
chr12	51487446	51566926	-	ENSG00000135457.5	TFCP2	0.275425	Ubiquitous	6.77397	8.73187	9.32843	8.60603	3.16804	10.7748	10.2346
chr13	114239013	114295785	+	ENSG00000198176.8	TFDP1	0.264575	Ubiquitous	17.8676	10.9022	15.2251	16.1243	8.66206	19.5632	17.5425
chr3	100428205	100467810	+	ENSG00000114354.8	TFG	0.176046	Ubiquitous	30.9034	19.7177	25.0764	27.7767	26.1236	32.3202	30.1844
chr16	67876213	67878097	+	ENSG00000168286.1	THAP11	0.288816	Ubiquitous	7.29764	7.32416	14.7589	13.9627	5.82973	13.8285	14.7351
chr2	242523820	242576864	-	ENSG00000176946.7	THAP4	0.199938	Ubiquitous	8.57062	8.11389	8.79895	10.8732	7.8757	9.38026	9.45616
chr1	155165379	155178842	-	ENSG00000169231.9	THBS3	0.273347	Ubiquitous	8.25615	5.22206	11.0424	11.1829	4.29179	11.4732	10.0269
chr22	29901868	29951205	-	ENSG00000100296.9	THOC5	0.148267	Ubiquitous	10.0259	9.55284	10.798	10.6457	7.1914	8.14076	9.62529
chr1	36690017	36770958	+	ENSG00000054118.9	THRAP3	0.297802	Ubiquitous	37.4197	21.6358	33.2814	32.883	19.6739	41.4386	29.6945
chr3	9404526	9428475	+	ENSG00000134077.11	THUMPD3	0.249827	Ubiquitous	6.54059	8.08357	8.79486	8.67816	5.70099	10.3328	10.6933
chr11	134118173	134123264	-	ENSG00000151500.10	THYN1	0.292029	Ubiquitous	9.31076	15.6995	11.1647	12.4195	9.3304	16.7571	13.2564
chr10	121334199	121356541	-	ENSG00000151923.13	TIAL1	0.248795	Ubiquitous	31.4056	29.143	37.6448	32.1407	19.9663	41.7873	38.0445
chr11	6502677	6505909	+	ENSG00000132286.7	TIMM10B	0.197605	Ubiquitous	10.1878	11.8801	14.2973	12.572	6.86738	14.4361	13.6962
chr1	201924619	201939789	+	ENSG00000134375.6	TIMM17A	0.171893	Ubiquitous	11.0704	11.1523	9.55286	11.1879	13.8156	12.9889	14.0417
chr19	7991603	8008805	-	ENSG00000104980.3	TIMM44	0.254952	Ubiquitous	8.85778	8.40207	7.67676	10.8688	7.58461	10.912	12.1473
chr3	119217379	119243937	+	ENSG00000113845.5	TIMMDC1	0.225205	Ubiquitous	11.3606	13.1377	16.634	15.5699	10.0263	17.8262	18.1886
chr1	168148171	168169950	+	ENSG00000143155.8	TIPRL	0.292108	Ubiquitous	16.2392	11.7039	11.9639	11.5521	6.7001	10.9011	16.1525
chr2	171847333	172087824	-	ENSG00000198586.9	TLK1	0.282443	Ubiquitous	14.6761	15.4431	13.3924	19.4804	10.4769	17.7446	21.1861
chr17	60536019	60692842	+	ENSG00000146872.13	TLK2	0.241887	Ubiquitous	14.6626	11.4414	13.4832	10.7345	5.95071	12.5711	12.5145
chr15	102161847	102192594	-	ENSG00000184277.8	TM2D3	0.252102	Ubiquitous	8.26521	20.3187	21.2349	16.016	11.7654	21.2102	17.7138
chr12	27126128	27167367	-	ENSG00000064115.6	TM7SF3	0.257673	Ubiquitous	21.1671	16.9736	26.4842	16.5038	27.6218	21.0669	20.8311
chr20	30697309	30755061	+	ENSG00000101337.11	TM9SF4	0.21353	Ubiquitous	11.9406	12.4663	14.8988	14.1731	11.1798	15.2694	16.9381
chr3	129366635	129612419	-	ENSG00000172765.12	TMCC1	0.208046	Ubiquitous	13.6608	17.4381	16.7477	13.6262	8.94551	15.8298	14.051
chr1	165696032	165796992	-	ENSG00000143183.12	TMCO1	0.274964	Ubiquitous	25.9039	20.6849	25.0546	30.2604	28.0742	35.1477	37.958
chr5	114949205	114968689	-	ENSG00000134970.13	TMED7	0.211326	Ubiquitous	24.4727	20.8615	29.0828	27.648	28.1531	34.598	33.5009
chr5	177019159	177023125	+	ENSG00000184840.7	TMED9	0.23802	Ubiquitous	31.0335	12.7349	32.6233	31.5817	34.8872	39.1583	36.1666
chr11	85359011	85367591	+	ENSG00000171202.2	TMEM126A	0.290647	Ubiquitous	12.9707	8.17564	8.58364	10.715	7.88015	9.07123	10.779
chr11	85339629	85347580	+	ENSG00000171204.8	TMEM126B	0.161644	Ubiquitous	11.7126	13.5086	13.5511	11.8402	8.49773	12.9849	14.3326
chr2	96914254	96931732	-	ENSG00000135956.4	TMEM127	0.279307	Ubiquitous	17.6329	12.514	21.8322	19.0371	12.2152	16.8919	23.1544
chr11	86748886	87034800	+	ENSG00000166575.12	TMEM135	0.279707	Ubiquitous	4.85969	8.65774	12.1252	8.38503	9.15453	10.7364	10.6089
chr6	10723148	10731362	+	ENSG00000111843.9	TMEM14C	0.297132	Ubiquitous	19.5887	16.5579	33.7044	27.5327	21.8058	36.9837	36.7785
chr19	47549165	47551888	-	ENSG00000130748.6	TMEM160	0.243045	Ubiquitous	7.64998	10.71	9.67995	7.1211	8.44971	8.92875	6.81257
chr5	87485450	87565293	-	ENSG00000164180.9	TMEM161B	0.230798	Ubiquitous	8.0175	8.43144	9.43319	8.35766	6.0952	9.27527	10.7493
chr1	109632425	109639556	+	ENSG00000215717.5	TMEM167B	0.270792	Ubiquitous	11.2298	9.83743	14.7238	13.1887	7.33598	16.2753	14.8929
chr9	140098534	140100090	-	ENSG00000187713.5	TMEM203	0.225109	Ubiquitous	7.47882	10.4698	12.321	9.90406	9.57544	13.3924	12.5166
chr20	5080486	5093749	-	ENSG00000089063.10	TMEM230	0.294597	Ubiquitous	25.3923	23.2213	33.1942	27.9893	30.2899	40.3722	30.785
chr19	1009647	1021117	-	ENSG00000182087.8	TMEM259	0.23117	Ubiquitous	32.9463	33.0159	54.788	43.4151	43.7979	56.9527	54.7584
chr4	41937137	41962589	+	ENSG00000109133.8	TMEM33	0.229884	Ubiquitous	6.05451	14.7757	16.8816	11.0456	16.0872	15.1265	17.3072
chr14	20925878	20929771	-	ENSG00000165782.6	TMEM55B	0.236368	Ubiquitous	5.97893	9.90313	10.0364	7.88488	4.67336	10.7291	10.7394
chr15	43415477	43477344	+	ENSG00000137842.2	TMEM62	0.271464	Ubiquitous	8.18303	7.15294	9.72109	8.30244	4.55271	8.09795	10.5257
chr3	69068978	69101484	-	ENSG00000144747.10	TMF1	0.231125	Ubiquitous	11.7316	6.36721	10.9154	9.57736	4.69465	11.4923	11.0739
chr12	98909290	98944157	+	ENSG00000120802.9	TMPO	0.298019	Ubiquitous	20.0446	13.2387	25.2496	21.3503	21.8551	15.9419	27.94
chr11	57480072	57508445	+	ENSG00000213593.5	TMX2	0.207375	Ubiquitous	18.8101	28.6807	25.5334	20.684	17.3227	29.3562	28.5798
chr20	7957995	8000476	-	ENSG00000125827.4	TMX4	0.264461	Ubiquitous	9.26337	21.6284	21.4758	24.4542	12.7285	22.5505	20.2755
chr10	93558069	93625033	+	ENSG00000107854.5	TNKS2	0.240151	Ubiquitous	19.4667	15.2217	21.0556	14.3091	9.33319	21.0836	16.7358
chr5	72112139	72212560	+	ENSG00000083312.13	TNPO1	0.241421	Ubiquitous	22.9376	18.2324	27.0448	23.0837	14.8166	28.4954	29.5751
chr7	128594948	128695198	-	ENSG00000064419.9	TNPO3	0.262128	Ubiquitous	13.3383	10.7629	16.8193	13.1585	9.21423	18.1981	17.2742
chr16	24741016	24838953	+	ENSG00000090905.13	TNRC6A	0.179773	Ubiquitous	22.4163	20.4926	19.3496	17.4975	14.4457	20.6826	17.8505
chr22	40440821	40731812	+	ENSG00000100354.16	TNRC6B	0.276465	Ubiquitous	20.7556	20.1083	22.1406	21.0786	11.1354	26.487	19.7672
chr17	48939584	48945339	-	ENSG00000141232.4	TOB1	0.285529	Ubiquitous	33.0803	14.0461	25.2137	34.532	40.3363	36.6114	29.4314
chr19	45393826	45406946	+	ENSG00000130204.8	TOMM40	0.282156	Ubiquitous	8.74812	10.4298	10.5556	11.6144	10.0828	11.0813	14.5138
chr3	100082275	100120242	-	ENSG00000154174.7	TOMM70A	0.153973	Ubiquitous	19.7215	16.4043	13.4515	16.5099	18.4788	16.1213	19.1437
chr3	25639475	25706398	-	ENSG00000077097.9	TOP2B	0.290769	Ubiquitous	37.866	32.0482	27.077	26.6746	13.6305	31.7975	29.9063
chr17	18174742	18218321	-	ENSG00000177302.10	TOP3A	0.259262	Ubiquitous	8.78453	9.89683	12.5689	9.2142	6.74663	9.47494	11.7445
chr9	132575223	132586413	-	ENSG00000136827.11	TOR1A	0.202151	Ubiquitous	7.48337	8.63903	11.8913	10.0886	9.9545	11.5627	12.4543
chr14	21944756	21967319	+	ENSG00000092203.9	TOX4	0.205521	Ubiquitous	11.8912	14.9135	20.0631	19.1997	10.459	19.9149	19.2597
chr20	62496596	62522898	+	ENSG00000101150.13	TPD52L2	0.217386	Ubiquitous	30.0141	19.7594	30.5158	29.0424	11.2237	25.9078	27.3453
chr13	103249353	103331521	+	ENSG00000134900.7	TPP2	0.239857	Ubiquitous	17.744	14.373	22.4829	16.1253	15.1316	23.5754	21.6673
chr1	3541566	3546691	+	ENSG00000158109.10	TPRG1L	0.245052	Ubiquitous	19.2525	27.9263	20.3294	20.9706	19.9531	19.8872	26.1048
chr13	45911008	45915505	-	ENSG00000133112.12	TPT1	0.16833	Ubiquitous	1018.43	256.07	1014.32	990.191	1020.13	964.831	846.636
chr7	23544399	23571660	-	ENSG00000164548.6	TRA2A	0.245121	Ubiquitous	38.9881	29.9181	39.8129	29.3567	17.9255	41.2559	30.8578
chr3	42055294	42267381	+	ENSG00000182606.10	TRAK1	0.217194	Ubiquitous	18.5777	18.4341	23.7739	23.2751	7.41498	24.1919	22.1496
chr17	7833663	7835441	-	ENSG00000170043.7	TRAPPC1	0.237789	Ubiquitous	15.302	19.6695	28.2192	27.6071	13.3055	26.3755	26.7944
chr21	45432200	45526433	+	ENSG00000160218.8	TRAPPC10	0.242696	Ubiquitous	12.4316	13.7233	15.2668	12.2972	7.42651	13.845	16.5038
chr4	184580420	184634745	+	ENSG00000168538.11	TRAPPC11	0.180377	Ubiquitous	13.4536	12.9627	14.8828	11.2362	7.23357	13.6032	14.9199
chr18	29409136	29533099	-	ENSG00000153339.9	TRAPPC8	0.169528	Ubiquitous	14.4636	12.0375	16.1702	12.4251	11.6725	14.0556	15.9193
chr1	114935399	115053781	-	ENSG00000197323.6	TRIM33	0.183219	Ubiquitous	14.778	14.6944	14.0724	10.7766	7.29108	14.0881	11.4997
chr5	14143811	14532235	+	ENSG00000038382.13	TRIO	0.26042	Ubiquitous	33.936	32.8678	33.2238	27.526	13.4778	18.1051	35.8619
chr14	92432335	92507240	-	ENSG00000100815.8	TRIP11	0.293919	Ubiquitous	10.0907	5.99248	7.73635	8.39051	4.39774	9.3216	6.91039
chr2	230628554	230787955	-	ENSG00000153827.9	TRIP12	0.233066	Ubiquitous	51.863	35.0276	46.2985	41.9809	24.0769	47.1117	44.1575
chr8	93895758	94029901	-	ENSG00000205133.7	TRIQK	0.283114	Ubiquitous	7.70024	11.823	14.7262	9.76061	8.56363	12.3415	13.1529
chr6	126307576	126360422	+	ENSG00000066651.13	TRMT11	0.190988	Ubiquitous	8.96304	10.0833	8.74114	9.20638	11.2726	9.98929	7.73505
chr3	3168600	3192563	+	ENSG00000072756.12	TRNT1	0.288371	Ubiquitous	8.34198	10.6429	14.6273	9.13797	6.71929	14.5455	13.0678
chr1	193028552	193060907	+	ENSG00000116747.8	TROVE2	0.22974	Ubiquitous	16.7123	22.9486	26.8746	23.8748	10.6589	25.3307	24.6769
chr20	33590207	33680674	-	ENSG00000100991.7	TRPC4AP	0.277838	Ubiquitous	13.9837	20.025	26.0188	18.2153	15.7384	21.2705	23.5057
chr15	50844670	50979012	-	ENSG00000092439.9	TRPM7	0.173788	Ubiquitous	16.7881	10.4708	16.6117	13.2567	15.8112	18.034	16.4608
chr3	150126122	150184218	+	ENSG00000196428.8	TSC22D2	0.294699	Ubiquitous	20.545	12.4123	16.8121	18.6724	11.164	14.3976	13.4841
chr11	18489883	18548779	-	ENSG00000074319.8	TSG101	0.222972	Ubiquitous	20.5611	13.2896	19.2285	15.0312	11.0791	17.983	19.2478
chr2	122494679	122525429	+	ENSG00000211460.7	TSN	0.225136	Ubiquitous	7.0668	15.516	14.4615	12.2656	8.23198	15.4617	14.6492
chr16	1399241	1401912	-	ENSG00000007520.3	TSR3	0.0943116	Ubiquitous	11.7928	11.1242	12.5204	12.6641	10.0779	12.755	11.1328
chr11	2421718	2425106	+	ENSG00000184281.10	TSSC4	0.280583	Ubiquitous	4.62114	6.68877	12.0049	12.6101	6.87584	12.5981	11.6427
chr2	166713985	166810353	-	ENSG00000123607.10	TTC21B	0.294983	Ubiquitous	9.21407	11.2944	11.9746	6.75063	5.42369	9.22662	8.74413
chr2	74710200	74722013	+	ENSG00000115282.15	TTC31	0.292731	Ubiquitous	3.53471	4.60764	9.77802	8.35292	10.9262	10.8214	9.27184
chr5	94799599	94890711	-	ENSG00000198677.6	TTC37	0.265371	Ubiquitous	30.8789	25.0274	26.6068	21.685	12.5271	23.3883	26.8727
chr10	135093135	135125841	-	ENSG00000130640.9	TUBGCP2	0.262215	Ubiquitous	15.2182	13.814	18.5656	16.6687	10.7002	20.9134	17.6107
chr13	113139325	113242481	-	ENSG00000126216.8	TUBGCP3	0.161925	Ubiquitous	9.39422	9.57644	11.0263	8.38254	6.93709	10.9374	10.2176
chr16	28853732	28857729	-	ENSG00000178952.4	TUFM	0.263829	Ubiquitous	41.1133	23.6471	29.5037	29.4408	43.6408	36.4379	46.1359
chr17	18684308	18710027	+	ENSG00000171928.9	TVP23B	0.297252	Ubiquitous	16.4579	7.90875	15.1737	13.972	11.391	19.2346	16.199
chr1	32645287	32663886	+	ENSG00000084652.11	TXLNA	0.252192	Ubiquitous	12.1754	7.18584	16.7701	16.9493	10.6603	17.7092	15.7176
chr22	36863083	36878077	-	ENSG00000100348.5	TXN2	0.215421	Ubiquitous	15.6378	14.4605	15.8098	22.2901	22.0024	21.8406	15.1791
chr1	52485803	52521843	-	ENSG00000117862.7	TXNDC12	0.22744	Ubiquitous	10.7168	8.59284	13.5546	10.1515	9.45314	13.9806	12.3364
chr18	77732867	77793949	-	ENSG00000141759.10	TXNL4A	0.265404	Ubiquitous	14.0167	20.6417	15.3046	15.9677	12.0796	16.4349	17.1764
chr21	44513066	44527697	-	ENSG00000160201.7	U2AF1	0.261027	Ubiquitous	27.0083	16.6095	27.8364	30.2073	15.086	30.9727	20.5805
chr19	56165512	56186081	+	ENSG00000063244.8	U2AF2	0.238418	Ubiquitous	24.807	18.2195	24.1005	25.8298	14.9324	28.7726	23.5867
chr3	142683339	142779567	+	ENSG00000163714.13	U2SURP	0.254325	Ubiquitous	37.2737	30.4337	37.5576	26.0704	19.678	40.8797	31.8842
chr3	132373290	132396941	+	ENSG00000081307.8	UBA5	0.268159	Ubiquitous	11.2731	15.859	14.3221	11.2962	9.69653	17.1127	12.6956
chr9	138824815	138853226	-	ENSG00000130560.4	UBAC1	0.2231	Ubiquitous	12.3871	11.4285	10.5078	11.8736	6.25177	9.28835	13.2444
chr13	99853028	100038688	+	ENSG00000134882.11	UBAC2	0.297	Ubiquitous	21.9722	13.3153	23.1136	17.6077	17.1242	28.0836	25.3235
chr16	4658884	4665028	-	ENSG00000153443.8	UBALD1	0.269255	Ubiquitous	6.71629	9.39633	8.84194	12.3417	10.118	11.7793	7.2598
chr5	138906016	139008018	+	ENSG00000131508.11	UBE2D2	0.235868	Ubiquitous	22.0013	20.7987	23.1836	20.038	10.5767	22.4386	25.9634
chr4	103715540	103790053	-	ENSG00000109332.15	UBE2D3	0.214181	Ubiquitous	68.1046	54.2851	82.9899	73.2805	52.2479	74.727	68.645
chr2	181831975	181941312	+	ENSG00000170035.11	UBE2E3	0.285759	Ubiquitous	16.5614	20.1824	18.065	17.3268	11.0099	24.1595	20.3888
chr2	238875469	238951236	+	ENSG00000184182.14	UBE2F	0.246045	Ubiquitous	10.6561	12.2011	12.9145	12.1105	8.85386	15.416	13.0015
chr21	46188955	46221934	-	ENSG00000184787.14	UBE2G2	0.234496	Ubiquitous	12.594	12.8201	16.3147	15.2538	9.77791	17.6984	14.5284
chr7	129470572	129592789	-	ENSG00000186591.7	UBE2H	0.226512	Ubiquitous	32.0216	22.672	29.2163	28.1551	15.1982	27.4432	25.925
chr1	1189289	1209265	-	ENSG00000160087.16	UBE2J2	0.234302	Ubiquitous	11.8428	14.1111	21.7991	19.8676	12.6479	21.2818	20.3978
chr1	154521053	154531504	-	ENSG00000160714.5	UBE2Q1	0.21732	Ubiquitous	10.4647	10.5586	13.2522	9.97476	7.52835	12.3425	11.3646
chr9	33817565	33920402	+	ENSG00000107341.4	UBE2R2	0.226111	Ubiquitous	14.1861	11.648	11.0201	13.9329	8.81933	9.37454	11.0761
chr20	48697661	48732496	-	ENSG00000244687.7	UBE2V1	0.289642	Ubiquitous	43.2718	34.9596	33.5496	37.7524	18.0797	30.7825	29.3072
chr15	25582381	25684128	-	ENSG00000114062.13	UBE3A	0.265004	Ubiquitous	23.3523	21.819	23.3551	22.2313	15.8605	30.0088	25.7199
chr11	118230300	118269926	+	ENSG00000110344.5	UBE4A	0.1946	Ubiquitous	8.6739	11.3862	12.057	10.528	8.5251	11.3498	12.9377
chr1	10092890	10241297	+	ENSG00000130939.14	UBE4B	0.202841	Ubiquitous	18.0894	16.975	15.7941	17.806	7.37915	19.695	18.1566
chr15	43235095	43398311	-	ENSG00000159459.7	UBR1	0.250917	Ubiquitous	9.74225	10.9622	14.0439	11.7203	4.9837	12.423	13.2887
chr6	42531800	42661242	+	ENSG00000024048.6	UBR2	0.286269	Ubiquitous	13.4122	10.4568	19.0778	13.1974	10.393	16.4745	17.7644
chr1	19401000	19536770	-	ENSG00000127481.10	UBR4	0.180063	Ubiquitous	25.7045	25.2886	31.4035	23.9722	22.1684	29.1485	28.2112
chr8	103265240	103425069	-	ENSG00000104517.8	UBR5	0.201107	Ubiquitous	29.342	23.4628	29.8186	22.1667	11.3005	27.1946	29.8924
chr11	62443970	62446567	-	ENSG00000162191.9	UBXN1	0.259175	Ubiquitous	19.0447	14.7825	21.1619	23.2957	11.5134	23.9332	16.5838
chr2	136499189	136542625	+	ENSG00000144224.12	UBXN4	0.238553	Ubiquitous	32.605	27.1628	38.7287	32.508	28.7835	44.2325	42.2961
chr3	196074533	196159345	-	ENSG00000163960.7	UBXN7	0.235558	Ubiquitous	10.4052	10.1751	12.0036	8.66805	4.61321	10.9318	10.2629
chr9	134399188	134406655	-	ENSG00000130717.8	UCK1	0.228152	Ubiquitous	6.19273	9.84686	9.5689	9.14327	10.6552	11.7694	9.09819
chr20	62571186	62587769	-	ENSG00000198276.9	UCKL1	0.181514	Ubiquitous	9.79424	7.3037	9.96235	9.97814	8.50229	11.0119	8.53756
chr6	96969471	97003152	+	ENSG00000014123.9	UFL1	0.205365	Ubiquitous	15.9174	9.96864	12.7522	13.395	9.41126	14.9597	15.4044
chr2	128848774	128953251	+	ENSG00000136731.8	UGGT1	0.268016	Ubiquitous	7.607	7.41167	13.9744	10.1859	10.2138	14.411	14.5276
chr9	6413151	6507054	+	ENSG00000147854.12	UHRF2	0.272404	Ubiquitous	16.1851	14.0778	22.2167	15.8597	10.5371	21.0022	19.3266
chr5	176332006	176449634	-	ENSG00000087206.12	UIMC1	0.20959	Ubiquitous	11.6181	12.7612	14.9068	13.8364	6.60138	15.4937	13.7543
chr12	132379196	132407712	+	ENSG00000177169.5	ULK1	0.185395	Ubiquitous	9.42265	12.6267	10.9906	12.6127	9.28408	10.236	9.1686
chr12	109535379	109548797	+	ENSG00000076248.6	UNG	0.286769	Ubiquitous	10.0372	5.9769	6.75774	5.62214	8.04076	10.8909	10.1717
chr19	18942747	18979045	+	ENSG00000005007.8	UPF1	0.285753	Ubiquitous	18.3189	13.6998	23.9418	19.2268	13.0924	25.9525	22.9392
chr20	33890369	33999944	-	ENSG00000101019.17	UQCC1	0.234023	Ubiquitous	10.298	17.0733	12.5877	14.6589	10.8175	17.9828	17.2113
chr7	43915493	43966010	-	ENSG00000106608.12	URGCP	0.223251	Ubiquitous	6.88195	12.6948	11.6956	13.3582	8.69328	13.5885	14.3573
chr19	30414551	30506611	+	ENSG00000105176.13	URI1	0.285222	Ubiquitous	25.909	18.2215	19.0297	17.7695	11.8279	25.5522	18.7144
chr9	131133598	131153015	+	ENSG00000167118.6	URM1	0.28725	Ubiquitous	4.47232	14.4563	16.9712	15.5997	10.1755	15.9285	18.1465
chr16	58033450	58055522	+	ENSG00000103005.7	USB1	0.236149	Ubiquitous	5.56938	8.29084	9.55613	10.5093	5.36861	10.4361	8.94407
chr19	35759881	35770724	+	ENSG00000105698.11	USF2	0.198869	Ubiquitous	27.6809	39.9974	39.8695	34.6984	41.4889	44.3539	29.4648
chr1	62901968	62917475	+	ENSG00000162607.8	USP1	0.257222	Ubiquitous	12.8926	7.27376	11.3876	10.068	4.39622	11.8897	12.4429
chr16	84733584	84813528	+	ENSG00000103194.11	USP10	0.163554	Ubiquitous	16.0234	18.0591	17.5305	20.6518	13.0181	19.6432	20.9071
chr18	158383	214629	+	ENSG00000101557.10	USP14	0.130796	Ubiquitous	13.9762	14.684	14.6886	12.6746	8.17615	12.7721	14.3213
chr21	30396950	30426809	+	ENSG00000156256.10	USP16	0.243156	Ubiquitous	17.9685	11.3958	14.791	15.0051	8.31969	16.2878	15.7971
chr17	20902910	20947073	-	ENSG00000124422.7	USP22	0.295655	Ubiquitous	23.7401	55.6503	58.5035	37.7913	21.9285	58.578	49.941
chr1	55532032	55680786	-	ENSG00000162402.8	USP24	0.238151	Ubiquitous	13.6873	15.7796	18.5778	13.7541	9.7908	15.2763	16.6328
chr1	78161672	78225537	-	ENSG00000077254.10	USP33	0.187515	Ubiquitous	24.7498	28.6134	29.2536	22.2175	13.9794	28.1288	24.92
chr2	61414598	61697904	-	ENSG00000115464.10	USP34	0.228089	Ubiquitous	36.1856	32.4346	37.4216	28.4035	16.6477	40.0012	34.1713
chr17	76783463	76837523	-	ENSG00000055483.15	USP36	0.252705	Ubiquitous	15.8899	10.4832	17.1385	12.4098	8.12543	15.7515	14.1854
chr2	85829979	85876403	+	ENSG00000168883.15	USP39	0.228299	Ubiquitous	12.6444	10.4777	15.77	12.8543	7.70772	15.559	13.7753
chr3	49315264	49378145	-	ENSG00000114316.8	USP4	0.277525	Ubiquitous	19.9774	16.1081	25.1504	19.3249	10.6523	21.4145	21.5462
chr11	11862970	11980870	+	ENSG00000170242.13	USP47	0.202227	Ubiquitous	21.5877	18.8335	23.9475	19.8727	14.046	20.6948	19.5931
chr1	22004791	22110099	-	ENSG00000090686.11	USP48	0.237898	Ubiquitous	25.3111	19.0169	20.6879	19.9347	11.8582	24.5231	19.7169
chr16	8985951	9058371	-	ENSG00000187555.10	USP7	0.286523	Ubiquitous	34.8534	21.7141	26.8982	27.8091	14.6876	26.7801	31.3134
chr15	50716577	50793280	+	ENSG00000138592.9	USP8	0.119767	Ubiquitous	18.0398	14.108	17.0815	15.9271	12.2777	18.0458	17.8732
chrX	40944888	41095832	+	ENSG00000124486.8	USP9X	0.142539	Ubiquitous	26.6078	25.5559	32.0011	30.3764	31.0215	34.3108	30.958
chrX	47511197	47518560	-	ENSG00000126756.7	UXT	0.265601	Ubiquitous	34.7866	11.228	26.4523	22.9843	26.0663	31.9717	34.5807
chr18	9913999	9960018	+	ENSG00000101558.9	VAPA	0.268969	Ubiquitous	30.6902	29.0142	38.6883	31.3328	17.4618	27.9844	33.2108
chr9	35056061	35073246	-	ENSG00000165280.11	VCP	0.201815	Ubiquitous	41.1736	31.1204	56.2433	54.4043	36.5475	53.0354	53.0739
chr8	42249142	42263415	+	ENSG00000078668.9	VDAC3	0.279655	Ubiquitous	49.7419	35.5917	29.8952	37.8582	24.7801	38.319	48.5438
chr17	56048910	56065620	-	ENSG00000136451.4	VEZF1	0.286698	Ubiquitous	16.8149	17.1953	25.672	27.1046	6.97282	26.9734	22.3743
chr17	57784553	57919616	+	ENSG00000062716.6	VMP1	0.229992	Ubiquitous	94.4156	20.6896	88.6182	98.465	84.2204	102.59	105.843
chr10	70883268	70932617	+	ENSG00000122958.10	VPS26A	0.234701	Ubiquitous	20.1259	14.145	19.9892	15.7244	8.5201	14.5295	20.261
chr16	46690054	46723430	-	ENSG00000069329.11	VPS35	0.265874	Ubiquitous	25.1112	19.0154	20.775	19.9341	8.08128	19.3566	23.4462
chr15	42450899	42500514	-	ENSG00000166887.11	VPS39	0.258716	Ubiquitous	20.7759	22.9746	27.7546	18.7603	9.99472	27.7117	23.2268
chr7	38762563	38971994	-	ENSG00000006715.11	VPS41	0.273845	Ubiquitous	14.943	20.2808	19.7429	12.6918	9.73581	16.2305	15.0183
chr16	69345259	69358949	+	ENSG00000132612.14	VPS4A	0.19549	Ubiquitous	19.8765	23.9099	19.9605	22.6915	10.01	23.636	19.24
chr17	411908	624957	-	ENSG00000141252.15	VPS53	0.246266	Ubiquitous	12.5446	15.5571	14.0854	11.8231	5.96913	15.2342	10.6991
chr2	64119280	64246206	-	ENSG00000143952.15	VPS54	0.285511	Ubiquitous	9.62758	6.937	14.1389	10.3007	7.52011	13.2918	12.9353
chr1	151142463	151167797	-	ENSG00000163159.7	VPS72	0.254667	Ubiquitous	6.19488	10.5492	10.0145	10.9696	4.67669	11.8267	10.4843
chr3	184529931	184770402	+	ENSG00000156931.11	VPS8	0.229357	Ubiquitous	26.9118	23.4934	26.7985	17.1368	9.46897	23.6861	23.8525
chr2	58134786	58387055	+	ENSG00000028116.12	VRK2	0.284996	Ubiquitous	13.4726	7.77506	11.4784	9.61824	5.69701	12.2541	10.9748
chr19	50479724	50529203	-	ENSG00000105053.6	VRK3	0.233634	Ubiquitous	10.185	9.92185	14.2885	13.2712	10.8025	15.8031	14.1965
chr13	42140973	42535256	-	ENSG00000102763.11	VWA8	0.260544	Ubiquitous	8.24655	7.21739	8.22581	9.29211	11.7382	8.51158	10.5857
chr10	28821422	28912041	+	ENSG00000095787.17	WAC	0.127423	Ubiquitous	46.776	44.5602	47.0016	43.2557	21.7111	47.6972	46.4123
chr10	88195013	88281572	-	ENSG00000062650.13	WAPAL	0.203643	Ubiquitous	16.4172	9.07073	16.1636	13.7516	9.05564	15.7577	14.6442
chr7	123321989	123389121	-	ENSG00000106299.7	WASL	0.299321	Ubiquitous	18.622	20.1115	16.7636	19.3567	15.4422	16.7638	25.4657
chr12	14939410	14956474	-	ENSG00000084463.3	WBP11	0.171061	Ubiquitous	15.568	14.8682	16.3709	14.4794	7.72517	16.0155	12.7665
chr7	73097355	73119491	+	ENSG00000071462.7	WBSCR22	0.246987	Ubiquitous	5.59433	8.07243	9.02255	7.82528	8.07255	10.5314	8.99456
chr10	122610687	122669036	+	ENSG00000120008.11	WDR11	0.276389	Ubiquitous	19.782	15.4386	22.6697	14.7181	13.2454	24.7391	21.5552
chrX	48448430	48463581	+	ENSG00000101940.13	WDR13	0.25584	Ubiquitous	5.25218	9.71907	11.5158	8.97087	6.56305	10.4073	10.5053
chr14	102605840	102691184	+	ENSG00000140153.13	WDR20	0.258445	Ubiquitous	7.8486	12.725	10.6369	11.166	5.25165	13.0865	10.5979
chr2	128458596	128568761	-	ENSG00000136709.7	WDR33	0.217413	Ubiquitous	16.0951	14.5284	19.4193	14.8943	10.2589	19.4881	16.311
chr5	110427414	110466200	+	ENSG00000134987.7	WDR36	0.190586	Ubiquitous	9.52051	6.81805	10.7752	7.30005	8.30794	10.3765	10.0063
chr17	80572438	80606429	-	ENSG00000141580.11	WDR45B	0.216665	Ubiquitous	27.9503	24.28	29.2132	24.0475	13.5013	22.0547	25.4685
chr9	137000487	137025093	+	ENSG00000196363.5	WDR5	0.284242	Ubiquitous	6.26967	7.65409	8.60981	7.60407	6.02217	10.7169	9.86444
chr11	62599814	62609281	-	ENSG00000133316.11	WDR74	0.205628	Ubiquitous	9.81009	9.41363	12.6931	12.0787	8.90732	12.9211	8.68189
chr3	52288437	52322036	-	ENSG00000164091.7	WDR82	0.249202	Ubiquitous	22.8542	25.9219	32.6432	29.2645	13.059	35.0905	34.3322
chr1	27561007	27635110	+	ENSG00000142784.11	WDTC1	0.229869	Ubiquitous	8.24329	14.1438	16.8691	17.226	8.19491	17.2447	15.0071
chr8	38127215	38239790	-	ENSG00000147548.12	WHSC1L1	0.279462	Ubiquitous	26.158	28.0463	23.6632	20.2118	8.55204	22.7726	19.893
chr7	5229819	5273457	+	ENSG00000157954.10	WIPI2	0.14721	Ubiquitous	18.6955	20.9647	22.2233	18.4271	15.4465	22.1813	17.996
chr6	2765648	2787186	+	ENSG00000124535.11	WRNIP1	0.279268	Ubiquitous	14.6287	12.304	18.4182	11.9515	8.47644	18.7601	15.3473
chr16	28109300	28223241	-	ENSG00000169180.7	XPO6	0.196303	Ubiquitous	20.1242	29.3654	30.0887	22.3022	14.311	29.6046	29.3857
chr8	21777180	21864096	+	ENSG00000130227.12	XPO7	0.286994	Ubiquitous	17.4744	20.858	20.0598	15.8974	8.71073	23.5316	17.6686
chr12	64798130	64844907	+	ENSG00000184575.7	XPOT	0.268158	Ubiquitous	14.621	15.6457	13.1762	9.07481	7.17029	13.8696	10.7893
chr2	216972187	217071026	+	ENSG00000079246.11	XRCC5	0.251565	Ubiquitous	67.478	47.8107	50.9821	49.7965	36.512	64.8369	53.0791
chr22	42017123	42060044	+	ENSG00000196419.8	XRCC6	0.280188	Ubiquitous	64.8345	33.2472	51.3544	56.2708	29.6523	53.0598	56.4273
chr3	142025449	142166904	-	ENSG00000114127.6	XRN1	0.24022	Ubiquitous	24.0904	13.0138	22.8734	18.1443	16.0485	18.0943	21.6461
chr20	21283942	21370463	+	ENSG00000088930.6	XRN2	0.237984	Ubiquitous	18.3641	9.15774	18.65	15.1386	11.4585	18.2418	12.9089
chr1	33240840	33283754	-	ENSG00000134684.6	YARS	0.188405	Ubiquitous	15.3429	16.7824	14.2147	13.9511	12.1196	12.989	13.1057
chr19	38795753	38807913	-	ENSG00000167645.12	YIF1B	0.223306	Ubiquitous	6.71534	10.0803	9.51892	6.61538	8.14595	7.24556	8.73475
chr6	43479565	43484728	-	ENSG00000137207.7	YIPF3	0.273612	Ubiquitous	17.023	23.5725	38.6083	28.0997	26.3677	37.6623	35.5423
chr5	143537723	143550278	-	ENSG00000145817.12	YIPF5	0.209307	Ubiquitous	12.6016	8.10167	13.3732	11.4989	7.71727	10.9506	12.5745
chrX	67718165	67757127	+	ENSG00000181704.7	YIPF6	0.234872	Ubiquitous	8.45103	9.19138	12.3939	10.6548	7.89365	13.4731	13.2669
chr7	44240567	44253893	+	ENSG00000106636.3	YKT6	0.297764	Ubiquitous	19.2095	20.5054	20.9843	22.8823	7.71631	24.5282	27.4898
chr10	27399383	27444195	-	ENSG00000136758.14	YME1L1	0.20095	Ubiquitous	33.2721	21.5146	33.4935	33.6075	23.3359	36.0079	37.8015
chr17	57409050	57479090	+	ENSG00000175155.4	YPEL2	0.213992	Ubiquitous	4.6094	13.9776	13.5833	11.6563	11.7765	14.5208	12.8775
chr2	30369807	30383399	+	ENSG00000119801.8	YPEL5	0.237488	Ubiquitous	27.6967	28.1238	38.6232	37.4577	17.4042	32.2688	33.7529
chr5	112849380	112930982	+	ENSG00000047188.11	YTHDC2	0.216171	Ubiquitous	12.8298	10.2109	11.7287	9.60873	7.61172	11.0368	10.1413
chr1	29063133	29096287	+	ENSG00000198492.10	YTHDF2	0.299648	Ubiquitous	10.8733	10.7577	20.9203	15.5054	11.9471	18.9755	19.8507
chr8	64081112	64125346	+	ENSG00000185728.12	YTHDF3	0.270691	Ubiquitous	11.143	14.7256	22.4034	19.3143	14.5784	19.0859	23.1385
chr20	43514317	43537173	+	ENSG00000166913.8	YWHAB	0.265809	Ubiquitous	67.8706	82.2911	74.3443	54.0896	25.5717	64.5357	83.6982
chr14	100704635	100749129	+	ENSG00000100811.6	YY1	0.218564	Ubiquitous	16.3883	11.6934	18.566	15.2898	9.6638	15.999	18.0145
chr1	155629237	155658791	-	ENSG00000163374.15	YY1AP1	0.221477	Ubiquitous	26.6061	22.3793	22.1181	25.7394	11.7425	21.7152	20.5862
chr1	203765437	203769686	+	ENSG00000257315.1	ZBED6	0.252096	Ubiquitous	14.8793	7.47821	15.0415	10.4203	10.6181	15.7737	12.3457
chr8	81397854	81438500	+	ENSG00000205189.7	ZBTB10	0.256646	Ubiquitous	3.47672	8.76972	12.5873	10.1301	10.4195	11.5457	11.7993
chr3	101367733	101396339	-	ENSG00000066422.4	ZBTB11	0.243907	Ubiquitous	10.2965	8.28862	10.218	7.03926	5.02465	8.76	7.3801
chr1	33065773	33116504	-	ENSG00000176261.11	ZBTB8OS	0.181214	Ubiquitous	12.562	10.4622	10.9703	11.3073	6.78823	12.8806	11.1888
chr1	203764782	203823252	+	ENSG00000058673.11	ZC3H11A	0.278662	Ubiquitous	29.791	28.8495	42.5526	38.2805	29.3227	48.6901	41.9358
chr14	89029253	89079853	+	ENSG00000100722.14	ZC3H14	0.284711	Ubiquitous	13.8474	20.1246	26.2084	17.3236	20.3689	28.5382	24.6054
chr16	88636789	88698374	+	ENSG00000158545.11	ZC3H18	0.177447	Ubiquitous	10.5489	8.18681	10.7931	10.9008	5.45181	10.5869	8.23132
chr19	47567444	47617009	-	ENSG00000130749.5	ZC3H4	0.249036	Ubiquitous	9.0667	7.72074	12.6505	12.3102	5.36356	12.9085	11.051
chr16	87439852	87525651	-	ENSG00000140948.7	ZCCHC14	0.294027	Ubiquitous	7.33061	9.45514	12.7629	8.98106	9.10023	13.7157	10.4673
chr12	122957417	122985518	-	ENSG00000033030.9	ZCCHC8	0.27751	Ubiquitous	10.0261	4.90229	9.6689	8.47095	6.61305	10.9187	7.65068
chr10	114190058	114206672	-	ENSG00000023041.7	ZDHHC6	0.267602	Ubiquitous	13.8435	9.63473	17.5877	14.4492	9.04956	18.8293	18.1786
chr6	37787275	38122400	+	ENSG00000156639.7	ZFAND3	0.259957	Ubiquitous	15.6227	16.6521	20.4797	25.5676	16.41	23.0575	21.3045
chr9	74966341	74980163	-	ENSG00000107372.8	ZFAND5	0.25005	Ubiquitous	77.3285	71.8555	86.3602	52.7877	65.9746	68.5042	52.1445
chr11	64851695	64855870	+	ENSG00000162300.7	ZFPL1	0.269472	Ubiquitous	7.04058	8.2033	8.86759	8.57318	5.754	10.8117	8.95105
chr6	28109688	28127250	+	ENSG00000198315.6	ZKSCAN8	0.276649	Ubiquitous	6.86799	9.19834	9.3716	8.66033	4.058	10.5794	7.75925
chr1	40723779	40759856	+	ENSG00000084073.4	ZMPSTE24	0.296054	Ubiquitous	16.3864	10.3902	17.9284	17.2504	10.3293	15.3102	20.739
chr13	20532810	20665968	+	ENSG00000121741.12	ZMYM2	0.182678	Ubiquitous	30.5051	27.5775	23.0069	26.347	14.9779	29.3613	28.3244
chr1	35734568	35887659	+	ENSG00000146463.7	ZMYM4	0.256957	Ubiquitous	14.1887	13.7706	14.719	12.5601	6.46338	16.7274	12.8732
chr20	45837859	45985567	-	ENSG00000101040.15	ZMYND8	0.274906	Ubiquitous	13.2472	14.85	10.6245	12.7625	5.34195	11.1826	11.447
chr5	43065278	43192123	+	ENSG00000172262.7	ZNF131	0.25932	Ubiquitous	10.0907	14.1998	13.9688	10.8077	6.3149	15.0469	11.4876
chr19	36705504	36729676	+	ENSG00000167635.7	ZNF146	0.2259	Ubiquitous	16.8601	15.3182	14.9731	15.0311	8.47566	18.5618	15.5542
chr17	30677136	30708905	+	ENSG00000010244.12	ZNF207	0.205439	Ubiquitous	50.691	30.2286	50.8197	40.5377	27.9033	46.2896	46.6256
chr18	32912176	32925446	-	ENSG00000172466.11	ZNF24	0.239334	Ubiquitous	15.6852	22.2424	22.2815	17.5657	12.9215	24.5878	21.5224
chr16	89786808	89807311	+	ENSG00000158805.7	ZNF276	0.267955	Ubiquitous	8.307	11.4518	12.0235	8.06826	6.34149	10.7052	7.93668
chr15	56922379	57210769	-	ENSG00000137871.15	ZNF280D	0.205598	Ubiquitous	18.7826	22.8867	23.1718	19.4431	10.4109	24.1161	20.2525
chr6	87862551	87973914	+	ENSG00000188994.8	ZNF292	0.202439	Ubiquitous	18.9402	17.6923	16.2806	13.9811	6.02116	18.0555	18.605
chr1	90460671	90501090	+	ENSG00000162664.12	ZNF326	0.172284	Ubiquitous	12.6435	12.569	10.1551	9.6419	7.5852	12.0376	10.8026
chr10	38299578	38354016	+	ENSG00000189180.11	ZNF33A	0.236615	Ubiquitous	8.68228	9.41875	14.4874	13.9386	8.85886	15.4117	15.2046
chr7	99084142	99097947	-	ENSG00000160908.14	ZNF394	0.251298	Ubiquitous	10.7127	5.79898	12.7275	11.3259	5.44489	12.6332	11.259
chr8	28203102	28260218	-	ENSG00000186918.9	ZNF395	0.267163	Ubiquitous	25.8684	9.40328	27.6116	20.8838	16.3189	23.5029	25.4315
chr6	56951642	57035105	+	ENSG00000112200.12	ZNF451	0.221008	Ubiquitous	20.0174	23.928	24.318	16.2319	11.5375	22.044	19.9025
chr19	57791419	57804937	+	ENSG00000197714.4	ZNF460	0.270728	Ubiquitous	26.4079	19.5249	24.7303	19.7586	11.3083	27.7221	19.5715
chr19	9715356	9732075	-	ENSG00000171469.6	ZNF561	0.273317	Ubiquitous	15.4554	7.27439	13.921	11.9425	6.78234	15.0936	12.3733
chr19	9759330	9785776	-	ENSG00000171466.5	ZNF562	0.223559	Ubiquitous	15.4594	12.8793	13.457	12.6992	6.62198	12.4908	15.8002
chr15	64752941	64978264	+	ENSG00000180357.5	ZNF609	0.210363	Ubiquitous	10.4047	11.8649	12.784	12.2459	6.04598	10.3664	9.64047
chr8	144718183	144735900	+	ENSG00000183309.7	ZNF623	0.24076	Ubiquitous	6.96563	8.63051	10.8858	8.56171	4.03304	10.7803	10.6185
chr2	71503691	71662199	+	ENSG00000075292.14	ZNF638	0.240929	Ubiquitous	55.5779	64.2051	55.9567	36.0272	39.0738	62.455	43.3269
chr1	91380859	91487829	-	ENSG00000122482.16	ZNF644	0.193438	Ubiquitous	22.0003	20.1874	25.3299	19.0381	13.3858	25.9034	25.4148
chr17	47366568	47439835	-	ENSG00000198740.4	ZNF652	0.295626	Ubiquitous	13.9289	17.4331	21.6818	18.166	9.78172	18.4019	23.5181
chr7	99156029	99174076	+	ENSG00000197343.6	ZNF655	0.260317	Ubiquitous	29.9224	30.2748	40.7118	32.3572	18.9953	34.1826	34.9506
chr7	126986844	127071978	-	ENSG00000048405.5	ZNF800	0.273881	Ubiquitous	9.21551	9.77774	13.4416	10.5447	7.16058	10.5741	11.2886
chr19	9862669	9903856	-	ENSG00000196605.3	ZNF846	0.25136	Ubiquitous	8.80584	12.6447	11.4354	8.64119	3.90328	11.5386	12.4736
chr10	126630692	126676758	+	ENSG00000019995.6	ZRANB1	0.0835119	Ubiquitous	10.4687	10.5104	9.76146	9.57153	9.17008	8.87593	9.94797
chr15	43650370	43663223	-	ENSG00000140265.8	ZSCAN29	0.270999	Ubiquitous	5.4497	7.29293	9.33488	8.27146	4.97492	9.94738	10.3501
chr5	60628100	60841997	+	ENSG00000130449.5	ZSWIM6	0.24635	Ubiquitous	8.63443	10.575	8.59625	8.46021	4.52743	7.27965	10.321
chr10	75545340	75561551	+	ENSG00000214655.6	ZSWIM8	0.176759	Ubiquitous	19.2709	14.1488	18.411	16.4444	15.5166	20.0512	15.2504
chr1	53192126	53293014	+	ENSG00000162378.8	ZYG11B	0.205837	Ubiquitous	8.4624	14.8746	11.5102	12.1815	10.3992	14.8859	13.5033
