# Supplementary material for: Characterization of distinct circular RNA signatures in solid tumors
Source: Mol Cancer. 2022 Mar 2;21:63. doi: 10.1186/s12943-022-01546-4 (PMC8889743; doi:10.1186/s12943-022-01546-4)
Supplement: Supplementary file 6 — Additional file 6: Table S9. The expression profiles of 1765 tissue-specific protein-coding genes. [file 12943_2022_1546_MOESM6_ESM.xlsx]

## Sheet: Table S9
Table S9. The expression profiles of 1765 tissue-specific protein-coding genes.
chr	start	end	strand	geneID	geneName	Yanai specificity	Tissue	Esophagus_median_FPKM	Brain_median_FPKM	Lung_median_FPKM	Stomach_median_FPKM	Liver_median_FPKM	Thyroid_median_FPKM	Intestine_median_FPKM
chr1	1361508	1363167	+	ENSG00000205116.3	TMEM88B	0.998122	Brain	0.159427	25.5989	0.073643	0.024946	0	0	0.030374
chr1	1950780	1962192	+	ENSG00000187730.6	GABRD	0.990857	Brain	0.122943	17.8755	0.361075	0.153201	0.0502475	0.234243	0.0589445
chr1	4714792	4852594	+	ENSG00000196581.6	AJAP1	0.960177	Brain	0.268498	10.8719	0.82743	0.461942	0.203857	0.609578	0.226379
chr1	6161853	6240183	-	ENSG00000116254.13	CHD5	0.993512	Brain	0.162138	23.2145	0.076667	0.374222	0.0082365	0.0289835	0.25342
chr1	6484848	6521430	+	ENSG00000187017.10	ESPN	0.931178	Liver	4.4363	0.103825	0.396942	0.700794	25.7508	0.08635	4.90907
chr1	8064464	8086368	-	ENSG00000116285.8	ERRFI1	0.870567	Liver	21.0205	8.71493	24.3081	41.9662	185.651	25.6838	22.4826
chr1	10458649	10480201	+	ENSG00000142657.16	PGD	0.864698	Esophagus	184.41	17.8666	32.0627	20.1999	20.2055	38.5047	20.8662
chr1	11086580	11107290	-	ENSG00000009724.12	MASP2	0.998561	Liver	0	0.135325	0.113831	0.088042	61.6611	0.097867	0.0971915
chr1	11708424	11715842	-	ENSG00000116661.9	FBXO2	0.907665	Brain	2.47733	26.8609	1.76655	1.54554	5.21901	2.995	0.877749
chr1	15898848	15911605	-	ENSG00000116771.5	AGMAT	0.959226	Liver	0.193209	0.811719	0.11345	1.39784	31.1495	0.543298	4.56105
chr1	16068917	16074477	+	ENSG00000162460.6	TMEM82	0.967126	Liver	0	0	0.006153	0.321788	10.8164	0.017496	1.78805
chr1	16340523	16346089	-	ENSG00000173641.13	HSPB7	0.914762	Stomach	3.61974	0.348299	4.20264	40.6753	0.255333	1.37378	11.0027
chr1	17531621	17572500	+	ENSG00000142623.8	PADI1	0.999819	Esophagus	83.2621	0.010048	0.004401	0	0.0057585	0	0.0703275
chr1	18434240	18704977	+	ENSG00000117154.7	IGSF21	0.967921	Brain	0.419839	13.8522	0.927096	0.327805	0.343271	0.360667	0.287517
chr1	19197926	19229275	-	ENSG00000159423.12	ALDH4A1	0.928416	Liver	8.74122	11.7328	2.95901	3.33702	77.5929	4.24328	2.31319
chr1	19609052	19615744	-	ENSG00000162482.4	AKR7A3	0.924313	Liver	0.623189	1.09577	0.501675	16.1889	64.127	0.744989	9.96683
chr1	20301925	20306932	-	ENSG00000188257.6	PLA2G2A	0.883484	Intestine	7.78589	0	0.7511	9.91716	13.6161	0.723057	46.9083
chr1	20808884	20812713	-	ENSG00000162545.5	CAMK2N1	0.870408	Brain	12.8186	145.202	29.4181	14.5001	14.0056	3.13537	39.0243
chr1	20915441	20945401	+	ENSG00000158825.5	CDA	0.858016	Esophagus	19.5383	0.234994	0.882908	1.27173	9.57842	0.419227	4.25746
chr1	21922708	21995801	-	ENSG00000076864.15	RAP1GAP	0.867283	Thyroid	3.77479	32.1902	7.69416	3.73981	3.85458	74.1244	7.77172
chr1	24018269	24022915	+	ENSG00000142676.8	RPL11	0.862303	Esophagus	806.946	52.1454	110.73	170.076	105.778	148.587	79.3685
chr1	24645812	24690972	+	ENSG00000158055.11	GRHL3	0.996802	Esophagus	31.6625	0.196807	0.05624	0.11539	0.0974315	0.044576	0.097089
chr1	26210672	26233482	-	ENSG00000117632.16	STMN1	0.905617	Brain	16.5466	130.448	15.5362	13.0148	3.89425	8.61074	16.2699
chr1	26346375	26362955	+	ENSG00000158008.5	EXTL1	0.981678	Brain	0.0768715	10.1159	0.264234	0.319011	0.016378	0.155202	0.280366
chr1	26648350	26680621	-	ENSG00000176092.9	AIM1L	0.976366	Esophagus	50.381	0	0.629527	1.15553	0.0947345	0.102153	5.16233
chr1	27189633	27190947	+	ENSG00000175793.10	SFN	0.982011	Esophagus	375.561	0.075766	4.68165	10.2576	0.102433	0.300835	25.1181
chr1	27237980	27240457	-	ENSG00000131910.4	NR0B2	0.976888	Liver	0	0	1.03587	1.98367	22.8169	0.028345	0.116174
chr1	27938575	27961788	-	ENSG00000000938.8	FGR	0.854946	Lung	3.57455	1.16137	21.053	5.25418	2.93919	3.09312	2.30048
chr1	32192718	32230494	-	ENSG00000121753.8	BAI2	0.967715	Brain	0.621162	38.2661	0.629017	2.30802	0.0459505	2.62336	1.18505
chr1	33351595	33364042	+	ENSG00000121905.5	HPCA	0.996252	Brain	0.0229555	32.1615	0.041836	0.141262	9.3e-05	0.117081	0.400039
chr1	35220648	35224113	+	ENSG00000189280.3	GJB5	0.996042	Esophagus	11.6502	0.193955	0.0442	0.021588	0	0	0.016948
chr1	35331037	35395186	-	ENSG00000116544.7	DLGAP3	0.994759	Brain	0.0871775	26.2773	0.080715	0.188535	0.0558655	0.261518	0.15254
chr1	36023074	36032875	+	ENSG00000020129.11	NCDN	0.943008	Brain	3.11579	101.126	6.61612	7.57041	2.14569	9.24252	5.88951
chr1	36771988	36790484	+	ENSG00000214193.5	SH3D21	0.861281	Thyroid	2.38391	3.45274	4.09098	1.80559	0.893243	19.6562	3.7336
chr1	39491990	39500308	+	ENSG00000168653.6	NDUFS5	0.891382	Esophagus	94.0667	13.9474	6.89409	17.6621	7.06029	9.59002	6.14997
chr1	39957318	39991607	+	ENSG00000183682.7	BMP8A	0.967808	Thyroid	0.179659	1.30962	0.440236	0.938369	0.115509	24.1016	1.67183
chr1	40144320	40157361	-	ENSG00000116983.8	HPCAL4	0.991768	Brain	0.836628	38.3581	0.482469	0.285417	0.021782	0.111385	0.156915
chr1	41086351	41131329	-	ENSG00000117016.5	RIMS3	0.946959	Brain	1.00642	39.3106	3.53084	2.18091	0.271422	1.61323	3.90752
chr1	42619092	42621495	+	ENSG00000044012.3	GUCA2B	0.988177	Intestine	0	0	0.037388	0.086907	1.0511	0	16.57
chr1	42628362	42630389	-	ENSG00000197273.3	GUCA2A	0.999768	Intestine	0	0	0.169307	0	0.046223	0	154.623
chr1	43735665	43739673	+	ENSG00000179178.6	TMEM125	0.860355	Lung	1.17188	5.3542	40.3863	3.09209	0.348456	13.5475	10.3244
chr1	46640745	46651630	+	ENSG00000117472.5	TSPAN1	0.934093	Intestine	1.85682	0.296028	7.77604	34.0596	1.15324	42.1956	220.859
chr1	47223510	47285085	+	ENSG00000142973.8	CYP4B1	0.984856	Lung	9.1373	0.148902	170.563	0.627826	0.0317195	5.23112	0.321117
chr1	47394849	47407156	-	ENSG00000187048.8	CYP4A11	0.999749	Liver	0.0163305	0.03872	0.152611	0.114375	255.064	0.050938	0.011018
chr1	47603107	47615413	+	ENSG00000162365.7	CYP4A22	0.999344	Liver	0.0308485	0.0336495	0.224388	0.01745	90.1783	0.0383555	0.009984
chr1	50513686	50669458	+	ENSG00000162374.12	ELAVL4	0.979319	Brain	0.145174	17.0403	0.067634	0.705879	0.0393995	0.070581	1.08575
chr1	54356912	54376759	+	ENSG00000211452.6	DIO1	0.916929	Liver	0.08656	0.028591	0.096463	0.083345	45.4911	22.3286	0.050354
chr1	57184477	57285369	-	ENSG00000187889.8	C1orf168	0.941426	Liver	0.358474	0.29816	3.03155	0.117137	14.6106	1.12917	0.200273
chr1	57320479	57383894	+	ENSG00000157131.10	C8A	0.999798	Liver	0	0	0.060344	0.148287	180.295	0.010366	0
chr1	57394883	57431813	-	ENSG00000021852.8	C8B	0.998098	Liver	0	0	1.98664	0.081986	183.536	0.025916	0
chr1	59041099	59043166	-	ENSG00000184292.5	TACSTD2	0.957485	Esophagus	286.775	0.0736695	59.29	8.96252	1.50201	2.92021	0.404259
chr1	60358980	60392462	-	ENSG00000134716.5	CYP2J2	0.900257	Liver	5.19603	7.56413	0.785743	1.83487	41.5002	0.14433	9.31101
chr1	63063158	63071830	+	ENSG00000132855.4	ANGPTL3	0.999771	Liver	0	0	0.029799	0.094556	122.457	0.035142	0.0091225
chr1	65713902	65881552	+	ENSG00000116675.11	DNAJC6	0.985864	Brain	0.654231	87.0549	2.32701	1.25034	0.21351	1.17282	1.76565
chr1	67263424	67266939	-	ENSG00000172410.4	INSL5	0.999549	Intestine	0	0	0	0	0	0.0580825	21.4642
chr1	70034081	70617628	+	ENSG00000033122.14	LRRC7	0.972334	Brain	0.239974	32.0122	0.078222	1.14059	0.406241	2.69106	0.757807
chr1	70876901	70905534	+	ENSG00000116761.7	CTH	0.933342	Liver	1.32636	3.01619	2.09727	2.24891	40.2519	4.01459	3.39537
chr1	77747736	78025651	+	ENSG00000154027.14	AK5	0.99039	Brain	0.521756	54.5926	0.142815	1.14608	0.047703	0.305042	0.984369
chr1	84330711	84464833	-	ENSG00000137941.12	TTLL7	0.897335	Brain	4.22583	37.6646	5.95778	6.20562	0.605498	2.17363	4.0327
chr1	86889769	86922241	+	ENSG00000137975.7	CLCA2	0.998748	Esophagus	99.0695	0.13444	0.137749	0.043358	0	0.013936	0.414774
chr1	86934051	86965972	+	ENSG00000016490.11	CLCA1	0.999814	Intestine	0	0	0.008544	0.390665	0.0273255	0.004755	387.247
chr1	87012761	87046437	+	ENSG00000016602.8	CLCA4	0.936468	Esophagus	233.424	2.78261	0	0.014754	0	0	86.182
chr1	89597434	89641723	-	ENSG00000213512.1	GBP7	0.998965	Liver	0	0.000893	0.052922	0.010871	13.3982	0.009428	0.0090715
chr1	89646831	89664615	-	ENSG00000162654.8	GBP4	0.851625	Lung	6.29479	1.72014	40.3733	7.98618	7.20276	7.38579	5.35277
chr1	89829617	89852020	+	ENSG00000183347.13	GBP6	0.99954	Esophagus	290.376	0.026917	0.167989	0.096713	0.0395085	0.449159	0.021688
chr1	92632542	92650280	+	ENSG00000069712.9	KIAA1107	0.928137	Brain	1.35263	24.192	2.23514	1.57555	0.785017	2.53727	1.94545
chr1	95582894	95663163	+	ENSG00000152078.5	TMEM56	0.882877	Liver	1.1233	8.26714	3.21215	4.4878	43.3176	3.54457	9.80606
chr1	99729509	99775146	+	ENSG00000117600.8	LPPR4	0.946896	Brain	1.49335	14.6537	1.01637	0.609768	0.015499	0.948459	0.585545
chr1	109822178	109825808	-	ENSG00000134222.12	PSRC1	0.926997	Brain	1.98212	17.5558	1.77685	0.987376	0.361073	1.14536	1.43697
chr1	110292702	110306649	-	ENSG00000198758.6	EPS8L3	0.930279	Intestine	0	0.0083935	0.016007	16.4243	0.115201	0.006001	39.61
chr1	110693108	110744824	+	ENSG00000197106.6	SLC6A17	0.99593	Brain	0.2052	24.3806	0.015708	0.189951	0.003707	0.080451	0.100349
chr1	111136202	111174096	-	ENSG00000177301.9	KCNA2	0.963515	Brain	0.579869	30.9354	0.213428	1.70577	0.070618	2.55132	1.65114
chr1	114420790	114430169	-	ENSG00000188761.7	BCL2L15	0.928313	Intestine	1.29822	0.425324	0.481134	7.20891	0.121863	0.29954	22.8655
chr1	115125469	115213043	-	ENSG00000175984.10	DENND2C	0.92009	Esophagus	16.4812	0.586789	1.99992	0.967892	1.74107	1.43272	1.17368
chr1	119911402	119936753	+	ENSG00000116882.10	HAO2	0.999446	Liver	0.035988	0.024719	0.045647	0.053603	76.8164	0.051193	0.044027
chr1	120290619	120311528	-	ENSG00000134240.7	HMGCS2	0.962405	Liver	1.04349	0	1.86208	9.80757	485.939	0.213724	96.6878
chr1	120336641	120354283	-	ENSG00000134193.10	REG4	0.909816	Stomach	0.0282065	0	0.012429	32.5572	0.059893	0	17.5162
chr1	145413095	145417545	+	ENSG00000168509.13	HFE2	0.999371	Liver	0	0.0228495	0.004439	0.041458	21.29	0.011603	0
chr1	145726918	145764074	+	ENSG00000174827.9	PDZK1	0.990637	Liver	0	0.0778905	0.043921	0.170333	13.3837	0.073371	0.386365
chr1	146646930	146714700	-	ENSG00000131781.8	FMO5	0.950297	Liver	0.531977	0.891513	6.16564	4.21509	75.1711	0.953461	9.65988
chr1	147228332	147245484	-	ENSG00000143140.6	GJA5	0.957805	Lung	0.391041	0.114156	12.5814	0.880611	0.168418	0.940665	0.690321
chr1	149874870	149889434	-	ENSG00000159164.5	SV2A	0.972082	Brain	0.162701	17.967	0.418293	1.07036	0.100098	0.667122	0.591014
chr1	149900543	149908791	-	ENSG00000014914.15	MTMR11	0.874101	Intestine	1.9421	1.53559	3.16825	6.21721	0.979977	1.13651	19.8302
chr1	150480538	150486265	+	ENSG00000143369.10	ECM1	0.988962	Esophagus	447.733	2.08931	4.63011	7.42485	10.5331	2.0285	2.94796
chr1	151009046	151020076	+	ENSG00000163141.14	BNIPL	0.950338	Esophagus	18.1642	0.187341	2.64663	0.128892	0.152721	2.16424	0.132607
chr1	151030234	151040970	+	ENSG00000213190.2	MLLT11	0.956233	Brain	0.637576	22.0248	0.515481	2.51558	0.33796	0.478763	1.29846
chr1	151674880	151689290	-	ENSG00000159409.10	CELF3	0.991312	Brain	0	14.4081	0.007057	0.257486	0.0010425	0.006186	0.47933
chr1	152004982	152020383	-	ENSG00000163191.5	S100A11	0.958397	Esophagus	660.509	6.23126	64.1556	43.0462	7.91843	27.3314	16.1907
chr1	152274651	152297679	-	ENSG00000143631.10	FLG	0.998775	Esophagus	26.7942	0.037025	0.033738	0.048075	0.011208	0.046627	0.020312
chr1	152381719	152386739	-	ENSG00000143536.7	CRNN	1	Esophagus	1674.87	0	0	0	0	0	0
chr1	152486978	152488486	+	ENSG00000169509.5	CRCT1	0.999991	Esophagus	450.448	0	0	0.024455	0	0	0
chr1	152551857	152552980	-	ENSG00000163202.4	LCE3D	1	Esophagus	12.7523	0	0	0	0	0	0
chr1	152881021	152884362	+	ENSG00000163207.5	IVL	0.999942	Esophagus	43.5419	0	0.015178	0	0	0	0
chr1	152956557	152958289	+	ENSG00000169474.3	SPRR1A	0.999994	Esophagus	1300.68	0	0	0.048252	0	0	0
chr1	152974223	152976332	+	ENSG00000163209.10	SPRR3	0.999997	Esophagus	1926.43	0	0	0.030401	0	0	0
chr1	153003678	153005376	+	ENSG00000169469.7	SPRR1B	1	Esophagus	609.474	0	0	0	0	0	0
chr1	153012201	153014407	-	ENSG00000163216.6	SPRR2D	0.999993	Esophagus	522.869	0	0.021911	0	0	0	0
chr1	153028589	153030013	-	ENSG00000241794.1	SPRR2A	0.999995	Esophagus	1409.41	0	0.039108	0	0	0	0
chr1	153042700	153113927	-	ENSG00000196805.6	SPRR2B	1	Esophagus	40.8142	0	0	0	0	0	0
chr1	153065611	153078660	-	ENSG00000203785.4	SPRR2E	1	Esophagus	484.287	0	0	0	0	0	0
chr1	153084590	153085991	-	ENSG00000244094.1	SPRR2F	1	Esophagus	25.9963	0	0	0	0	0	0
chr1	153330330	153333503	+	ENSG00000163220.10	S100A9	0.998511	Esophagus	10779.3	1.49138	43.4767	35.5314	8.4847	4.19766	3.09739
chr1	153346184	153348125	-	ENSG00000163221.7	S100A12	0.977779	Esophagus	14.9636	0	0.824585	0.748186	0.268782	0.0841945	0.069314
chr1	153362508	153363664	-	ENSG00000143546.5	S100A8	0.998605	Esophagus	7127.51	0.783234	28.5357	19.8773	4.68298	2.97915	2.80491
chr1	153430220	153433177	-	ENSG00000143556.4	S100A7	1	Esophagus	22.742	0	0	0	0	0	0
chr1	153533584	153540366	-	ENSG00000196754.6	S100A2	0.998428	Esophagus	212.142	0.101366	0.471481	0.327495	0.021022	0.885498	0.194449
chr1	153579362	153585621	-	ENSG00000188643.6	S100A16	0.880656	Esophagus	192.896	13.5871	30.2269	22.8603	27.5696	15.5129	28.369
chr1	153586731	153589462	-	ENSG00000189334.4	S100A14	0.983831	Esophagus	912.394	0.12937	18.0243	14.7885	3.18651	25.1223	27.2616
chr1	153600402	153604513	+	ENSG00000160678.7	S100A1	0.933623	Brain	0.878883	58.3768	0.641115	1.38026	1.04424	18.628	0.676755
chr1	153963235	153964626	+	ENSG00000177954.7	RPS27	0.967676	Esophagus	1356.38	44.246	45.4237	64.8299	25.4778	60.3752	22.7072
chr1	155259630	155271225	-	ENSG00000143627.13	PKLR	0.999017	Liver	0	0.028755	0.004491	0.016899	16.3166	0.0087255	0.037385
chr1	155829300	155854990	+	ENSG00000132718.7	SYT11	0.958097	Brain	2.86246	115.151	7.52384	7.44807	0.874344	3.19004	7.05214
chr1	156213206	156217881	-	ENSG00000160781.11	PAQR6	0.985576	Brain	0.62796	64.8887	0.634564	1.19708	0.581997	1.01718	1.55676
chr1	156374042	156400493	-	ENSG00000125462.12	C1orf61	0.999507	Brain	0.0581045	184.765	0.070118	0.202957	0.0301865	0.03047	0.154609
chr1	156589086	156595517	+	ENSG00000132702.8	HAPLN2	0.997583	Brain	0.055808	38.4758	0.154434	0.185518	0.0125005	0.112408	0.037203
chr1	156611182	156629324	+	ENSG00000132692.14	BCAN	0.995988	Brain	0.0096845	59.3762	0.056798	1.10837	0.012552	0.0403495	0.201707
chr1	156669398	156675608	-	ENSG00000143320.4	CRABP2	0.992679	Esophagus	243.767	1.03964	0.926796	1.61414	0.128394	5.47333	1.52579
chr1	157800704	157868046	-	ENSG00000073754.5	CD5L	0.994548	Liver	0	0.0191	1.29142	0.016636	42.1905	0.022974	0.0301195
chr1	159141399	159173103	+	ENSG00000162706.8	CADM3	0.940667	Brain	2.39863	57.1939	2.61413	7.13061	0.190644	1.52281	6.50395
chr1	159259504	159278014	+	ENSG00000179639.6	FCER1A	0.853395	Esophagus	14.3924	0.024659	5.26063	2.63295	1.15752	1.31443	2.26979
chr1	159557615	159558655	+	ENSG00000132703.3	APCS	0.999864	Liver	0	0	0.057645	0.390837	637.502	0.0708235	0
chr1	159682079	159684379	-	ENSG00000132693.8	CRP	0.998761	Liver	0.0071655	0	0.129087	0.425828	82.6549	0.0329445	0.019312
chr1	160007257	160040038	-	ENSG00000177807.6	KCNJ10	0.994003	Brain	0.0360815	36.1487	0.018378	0.130767	0.781328	0.136872	0.197262
chr1	160051360	160060353	+	ENSG00000162728.4	KCNJ9	0.998912	Brain	0.0077735	20.8497	0.019196	0.031857	0.00559	0.014429	0.0572985
chr1	160085549	160113381	+	ENSG00000018625.10	ATP1A2	0.93766	Brain	7.11769	166.283	4.09686	25.7422	0.299951	1.26643	23.6731
chr1	160846329	160854960	-	ENSG00000179914.4	ITLN1	0.986437	Intestine	0.026755	0	2.21518	0.676108	1.74613	0.0226565	57.5953
chr1	160914815	160924589	-	ENSG00000158764.6	ITLN2	0.998761	Lung	0.0480225	0	23.2074	0.012898	0.084428	0	0.027181
chr1	161040785	161059389	-	ENSG00000143217.7	PVRL4	0.973262	Esophagus	28.0028	0.00252	1.79943	1.16711	0.034756	0.221315	1.26737
chr1	161190160	161192296	+	ENSG00000268387.1	AL590714.1	0.997243	Liver	0.121695	0.025858	0.649192	0.462243	79.0503	0	0.0487405
chr1	161192082	161193421	-	ENSG00000158874.7	APOA2	0.999678	Liver	0	0	1.62391	4.1204	4037.75	1.92006	0.134175
chr1	161199456	161208092	-	ENSG00000143257.7	NR1I3	0.997314	Liver	0	0.183946	0.089607	0.092394	35.2755	0.082125	0.120392
chr1	163038565	163046592	+	ENSG00000117152.9	RGS4	0.961905	Brain	1.26918	58.5194	1.16034	7.1304	0.773973	1.3808	1.66094
chr1	166882443	166944719	-	ENSG00000143195.8	ILDR2	0.946971	Brain	0.129838	11.3893	0.931526	0.404211	0.184799	0.236152	1.73725
chr1	167022073	167059868	-	ENSG00000143167.7	GPA33	0.991648	Intestine	0.042214	0.038319	3.63011	1.18678	0.053846	0.049315	99.7857
chr1	169483404	169555826	-	ENSG00000198734.6	F5	0.98987	Liver	0.865966	0.258059	0.539857	1.77113	71.358	0.537303	0.364895
chr1	171060018	171086959	+	ENSG00000007933.8	FMO3	0.982413	Liver	4.17537	0.229321	14.5218	1.67277	208.58	1.11307	0.297221
chr1	171154347	171181822	+	ENSG00000094963.9	FMO2	0.903333	Lung	45.488	0.800605	113.483	4.00424	2.56126	11.2572	1.70959
chr1	171604557	171621823	-	ENSG00000034971.10	MYOC	0.853814	Stomach	2.88044	0	1.8282	15.8083	0.010971	7.39549	1.75059
chr1	171810621	172387606	+	ENSG00000197959.9	DNM3	0.946183	Brain	1.88717	37.8781	4.9493	2.31752	0.17386	1.78722	1.11579
chr1	173872947	173886516	-	ENSG00000117601.9	SERPINC1	0.999776	Liver	0.024591	0.047121	0.307789	0.706842	1100.26	0.304658	0.0845185
chr1	175284330	175712906	-	ENSG00000116147.12	TNR	0.992541	Brain	0.061636	24.1863	0.773036	0.053707	0.0467585	0.045341	0.101987
chr1	176826438	177134109	-	ENSG00000152092.11	ASTN1	0.99206	Brain	0.037398	29.4695	0.178188	0.584794	0.117395	0.118807	0.367405
chr1	177140633	177251558	+	ENSG00000198797.6	BRINP2	0.996516	Brain	0.0086935	12.8693	0.012875	0.059583	0.0839445	0.0561005	0.047856
chr1	181382238	181777219	+	ENSG00000198216.6	CACNA1E	0.994225	Brain	0.067335	16.6828	0.029969	0.194924	0.0044945	0.039317	0.241969
chr1	182567758	182573543	-	ENSG00000143333.6	RGS16	0.909028	Thyroid	2.46748	1.2138	7.10391	5.83744	2.10501	38.6991	2.39564
chr1	183217372	183387737	-	ENSG00000157064.6	NMNAT2	0.962307	Brain	0.535786	25.7725	0.422803	1.617	0.0317065	1.83174	1.38967
chr1	183898796	184006863	-	ENSG00000198756.6	COLGALT2	0.900785	Brain	0.365761	15.547	3.18934	2.47532	0.135981	1.58166	1.5069
chr1	185703683	186160085	+	ENSG00000143341.7	HMCN1	0.852791	Lung	5.62415	0.343734	19.1889	2.33657	3.20548	2.52096	2.91774
chr1	186265405	186283694	+	ENSG00000116690.7	PRG4	0.97768	Liver	0.0763185	0.0111625	1.8856	0.139909	16.2803	0.02929	0.037968
chr1	190066792	190446759	-	ENSG00000162670.8	BRINP3	0.902066	Brain	0.203625	11.0064	1.28948	0.346349	0	1.85775	2.77018
chr1	196621008	196716634	+	ENSG00000000971.11	CFH	0.925123	Liver	43.1066	2.49567	43.6386	35.1407	456.435	55.3322	25.3441
chr1	196743925	196763203	+	ENSG00000116785.9	CFHR3	0.99781	Liver	0.0502255	0.0105685	0.565665	0.392991	152.68	0.656404	0.330581
chr1	196788887	196801319	+	ENSG00000244414.2	CFHR1	0.998099	Liver	0.862342	0.052492	0.706685	1.24241	394.327	0.946614	0.687983
chr1	196788898	196928356	+	ENSG00000080910.7	CFHR2	0.999797	Liver	0	0	0.056388	0.196513	268.15	0.0734	0
chr1	196819371	196888102	+	ENSG00000134365.8	CFHR4	0.999812	Liver	0	0.0060045	0.012395	0.012736	33.3277	0.006501	0
chr1	196946667	196978804	+	ENSG00000134389.8	CFHR5	0.999772	Liver	0	0	0	0.039427	30.045	0.0016825	0
chr1	197008321	197036397	-	ENSG00000143278.3	F13B	0.999637	Liver	0	0	0.009336	0.112529	61.4737	0.011939	0
chr1	200938520	200992828	-	ENSG00000116852.10	KIF21B	0.887821	Brain	1.25906	18.2685	4.2503	1.8595	1.38998	0.892489	2.6447
chr1	201252580	201302121	+	ENSG00000081277.7	PKP1	0.997288	Esophagus	119.308	0.130821	1.35696	0.061442	0.01286	0.262078	0.117586
chr1	201342372	201368736	-	ENSG00000159166.9	LAD1	0.903973	Esophagus	69.251	0.010454	3.33817	10.3871	5.88114	1.36639	18.9166
chr1	201857808	201861434	+	ENSG00000198892.6	SHISA4	0.869863	Brain	1.1383	29.3818	3.69798	4.28458	1.60653	10.3036	1.91095
chr1	201865580	201915715	-	ENSG00000163431.11	LMOD1	0.863293	Stomach	36.5338	0.955296	13.4574	208	1.03927	15.1524	103.472
chr1	202091986	202102720	+	ENSG00000170075.8	GPR37L1	0.991091	Brain	0.0393515	20.0192	0.055107	0.27347	0.014369	0.269042	0.418745
chr1	202995626	203047868	+	ENSG00000143847.11	PPFIA4	0.967498	Brain	0.682436	17.3053	0.611064	1.21975	0.0560385	0.341266	0.464158
chr1	203059782	203136533	+	ENSG00000163485.11	ADORA1	0.956339	Brain	0.281486	15.3775	0.964607	0.623092	0.244858	1.55421	0.360102
chr1	203148059	203155877	-	ENSG00000133048.8	CHI3L1	0.898277	Liver	3.57705	5.21564	5.37541	1.1548	30.0714	2.35983	0.670972
chr1	203181955	203242769	-	ENSG00000133063.11	CHIT1	0.970179	Lung	0.198974	0.207511	12.1112	0.425552	0.0675605	0.616706	0.650718
chr1	204100190	204121307	-	ENSG00000143845.10	ETNK2	0.933868	Liver	5.05561	2.67852	1.70894	1.58568	45.9251	6.0342	1.15972
chr1	204167288	204183220	-	ENSG00000174567.7	GOLT1A	0.9685	Liver	0.077283	0.281205	2.1573	1.39829	25.6217	0.376236	0.552265
chr1	205012325	205047627	+	ENSG00000184144.5	CNTN2	0.994489	Brain	0.214265	53.4925	0.02698	0.426863	0.0194055	0.0868345	0.994473
chr1	205197304	205242471	+	ENSG00000133069.10	TMCC2	0.937463	Brain	0.51352	16.8556	2.10097	1.3126	0.177429	1.33402	0.886091
chr1	205473723	205501921	+	ENSG00000117266.11	CDK18	0.879616	Brain	3.25363	49.3688	8.27401	5.53316	5.79641	6.71429	6.08768
chr1	206317459	206332104	+	ENSG00000196188.6	CTSE	0.97108	Stomach	0	0	5.5959	67.3068	0.100556	2.32999	3.65243
chr1	207101863	207119811	-	ENSG00000162896.5	PIGR	0.938712	Intestine	16.7219	0.0538565	125.415	919.322	23.7741	0.861313	2953.66
chr1	207262187	207273338	+	ENSG00000123843.8	C4BPB	0.994517	Liver	0.090233	0	1.53537	1.17173	115.733	0.019781	0.98997
chr1	207277607	207318317	+	ENSG00000123838.6	C4BPA	0.971856	Liver	0.0156965	0.0014175	61.3443	0.37697	368.124	0.177882	0.246023
chr1	207494853	207534311	+	ENSG00000196352.9	CD55	0.857171	Lung	29.6959	7.04207	119.096	26.4897	6.89196	13.87	18.0726
chr1	209859510	209908295	+	ENSG00000117594.5	HSD11B1	0.98503	Liver	0.458083	2.20997	6.86668	1.90555	146.175	0.85137	0.838189
chr1	210856555	211307457	-	ENSG00000143473.7	KCNH1	0.987485	Brain	0.113979	12.3029	0.035162	0.299561	0.0188225	0.081424	0.374853
chr1	214156524	214214595	+	ENSG00000117707.11	PROX1	0.876254	Liver	1.85976	8.04334	1.76936	1.74511	36.4099	10.6621	2.95367
chr1	219858769	220131989	-	ENSG00000196660.6	SLC30A10	0.951102	Liver	0.0075745	3.2668	0.013767	0.064972	31.0994	0.056303	5.71478
chr1	225997794	226033260	+	ENSG00000143819.8	EPHX1	0.892255	Liver	35.8627	27.2093	75.1858	33.5851	380.395	48.0835	25.9864
chr1	226073982	226099082	-	ENSG00000243709.1	LEFTY1	0.99487	Intestine	0.035139	0.38059	0.211228	0.147684	0.254879	0.101362	36.7428
chr1	229456758	229479041	-	ENSG00000154429.6	CCSAP	0.876548	Brain	2.53329	20.8711	4.41961	2.29028	1.4287	2.07835	2.70919
chr1	230457392	230561475	-	ENSG00000177614.5	PGBD5	0.937693	Brain	0.606237	19.874	1.25669	0.389892	1.6825	2.52823	0.96614
chr1	230838269	230850043	-	ENSG00000135744.7	AGT	0.975256	Liver	0.399093	49.3936	0.921906	3.78612	385.022	1.32136	1.33963
chr1	236849754	236927931	+	ENSG00000077522.8	ACTN2	0.941268	Brain	0.134335	11.8637	2.15763	1.64724	0.080741	0.109369	0.051374
chr1	240177648	240638489	+	ENSG00000155816.15	FMN2	0.968579	Brain	0.129764	24.9616	0.158918	1.14884	0.006084	0.23372	3.02855
chr1	240931554	241520530	-	ENSG00000182901.11	RGS7	0.994878	Brain	0.0742885	13.7747	0.058514	0.162203	0.009219	0.008829	0.11024
chr1	241695434	241758944	+	ENSG00000117009.7	KMO	0.951259	Liver	0.262184	0.321516	2.66088	0.479102	15.8886	0.267016	0.655856
chr2	1377995	1547483	+	ENSG00000115705.16	TPO	0.998474	Thyroid	1.43507	0.0173555	0.05945	2.14676	0.01377	528.046	1.16328
chr2	1792885	2335032	-	ENSG00000186487.13	MYT1L	0.998894	Brain	0	33.1954	0.010753	0.05867	0.013988	0.0129695	0.123892
chr2	3501132	3523507	-	ENSG00000182551.9	ADI1	0.865137	Liver	13.8755	9.04537	19.078	18.6954	117.182	15.3379	18.7888
chr2	3642426	3692048	+	ENSG00000118004.13	COLEC11	0.967112	Liver	1.14171	0.39506	1.01798	1.21377	43.6773	3.90735	0.942814
chr2	10085341	10142411	+	ENSG00000134317.13	GRHL1	0.965392	Esophagus	45.3406	1.36145	2.12735	1.00003	2.89759	1.36823	0.660239
chr2	14772810	14790933	+	ENSG00000162981.12	FAM84A	0.889735	Intestine	5.71687	11.9625	6.60073	1.98739	1.00896	1.55746	43.5827
chr2	17720393	17838285	+	ENSG00000163032.7	VSNL1	0.967321	Brain	20.4654	142.931	1.29688	0.759723	4.76627	0.140608	0.596052
chr2	18059114	18542882	+	ENSG00000170745.7	KCNS3	0.852103	Lung	2.84388	1.67449	24.892	7.14633	1.43635	1.56413	7.42348
chr2	21224301	21266945	-	ENSG00000084674.9	APOB	0.999658	Liver	0.0755275	0.076105	0.192504	1.4489	1144.81	0.262516	0.29364
chr2	25264999	25378243	+	ENSG00000084710.9	EFR3B	0.922541	Brain	0.181704	19.4826	4.62317	0.574015	0.138364	2.77096	0.766326
chr2	26149471	26205618	-	ENSG00000084731.9	KIF3C	0.948344	Brain	1.5748	43.4746	2.61304	3.04675	0.639139	2.94675	2.65387
chr2	26915619	26956288	+	ENSG00000171303.5	KCNK3	0.866156	Lung	0.910363	1.6201	13.4511	4.98343	0.133813	2.09271	1.06164
chr2	27070615	27173219	+	ENSG00000157851.12	DPYSL5	0.996474	Brain	0	14.634	0	0.116314	0	0	0.193293
chr2	27309615	27323640	+	ENSG00000138030.8	KHK	0.979571	Liver	0.788615	2.87102	1.54333	2.78847	89.255	1.03836	1.9104
chr2	27321757	27341995	-	ENSG00000138028.10	CGREF1	0.942393	Brain	0.643831	11.4795	0.20957	1.28913	0.908744	0.274641	0.641893
chr2	27719709	27746554	+	ENSG00000084734.4	GCKR	0.991578	Liver	0.739621	0.301871	0.044065	0.994365	42.3197	0.0251165	0.0333795
chr2	31395924	31456724	-	ENSG00000214711.5	CAPN14	0.998361	Esophagus	53.5632	0.232405	0.124748	0.034065	0.0188135	0.0560475	0.0608005
chr2	31557187	31637581	-	ENSG00000158125.5	XDH	0.912624	Liver	2.18505	0	0.163429	1.4717	27.4519	0.13768	10.434
chr2	39892122	39945103	+	ENSG00000152154.6	TMEM178A	0.905156	Brain	0.695407	18.6443	3.14697	1.78412	0.955138	2.91424	1.11393
chr2	42994229	43019733	-	ENSG00000162882.10	HAAO	0.948126	Liver	2.87675	0.954718	4.17149	7.23035	81.4998	3.79371	6.33927
chr2	43864412	43995126	+	ENSG00000152527.9	PLEKHH2	0.850921	Lung	8.06184	2.88613	32.0103	6.04787	1.25531	4.4138	5.96736
chr2	44039611	44066004	-	ENSG00000138075.7	ABCG5	0.999006	Liver	0	0.074298	0.00712	0.041938	25.0015	0.005225	0.0205425
chr2	44066103	44105605	+	ENSG00000143921.6	ABCG8	0.997953	Liver	0	0.227858	0.017503	0.111405	31.9754	0.0155855	0.0203005
chr2	46520806	46613836	+	ENSG00000116016.9	EPAS1	0.898832	Lung	49.114	25.8044	460.04	37.3012	53.0534	80.4	33.5744
chr2	47572297	47614740	+	ENSG00000119888.6	EPCAM	0.872269	Intestine	7.22472	0.546877	30.4095	44.714	2.15234	90.2433	228.724
chr2	50145643	51259674	-	ENSG00000179915.16	NRXN1	0.955438	Brain	2.00863	77.9916	0.260949	7.88303	0.172074	0.794449	9.7334
chr2	54080050	54087126	-	ENSG00000119737.5	GPR75	0.880618	Brain	1.42097	11.0531	1.15555	0.859925	1.44438	2.27788	0.758552
chr2	69172364	69180102	-	ENSG00000183607.5	GKN2	0.991917	Stomach	0	0	9.99609	208.905	0.122955	0.012757	0
chr2	69201705	69208106	+	ENSG00000169605.5	GKN1	0.999849	Stomach	0	0	0	1175.36	1.06547	0	0
chr2	70834750	70995357	-	ENSG00000075340.18	ADD2	0.97933	Brain	0	10.1027	0.493588	0.259592	0.047032	0.117121	0.335583
chr2	73481810	73511559	-	ENSG00000163013.7	FBXO41	0.958014	Brain	1.11101	30.3156	1.5208	1.37431	0.501827	1.17063	1.95835
chr2	73867959	73869520	-	ENSG00000144035.3	NAT8	0.999183	Liver	0	0.0601075	0.045563	0.028768	27.4147	0	0
chr2	74443369	74570541	-	ENSG00000188687.11	SLC4A5	0.946101	Thyroid	1.18126	1.38583	2.00735	0.667207	0.283965	19.1831	0.678073
chr2	75061108	75120486	+	ENSG00000159399.5	HK2	0.866573	Intestine	10.1119	2.2212	11.3566	5.03325	0.911269	6.18839	44.7469
chr2	75696428	75796848	-	ENSG00000115363.9	EVA1A	0.909393	Liver	0.340311	0.068036	16.5071	0.276515	35.55	1.66824	0.466321
chr2	76974845	77820445	-	ENSG00000176204.9	LRRTM4	0.970334	Brain	0.100701	13.8487	1.21816	0.470614	0.0817395	0.0255555	0.568287
chr2	79347488	79350545	+	ENSG00000115386.5	REG1A	0.999534	Stomach	0	0	0.035371	80.3829	0.113817	0.026275	0.049118
chr2	79384132	79386879	-	ENSG00000172016.11	REG3A	0.999189	Stomach	0	0	0	13.2976	0.042606	0	0.0220615
chr2	79412357	80875905	+	ENSG00000066032.14	CTNNA2	0.995235	Brain	0.0407355	41.4964	0.010324	0.402081	0.025267	0.0351045	0.672933
chr2	85048774	85134132	-	ENSG00000186854.6	TRABD2A	0.948543	Intestine	0.731877	1.91102	2.8198	1.3579	1.44958	1.12589	30.4336
chr2	85884437	85895864	-	ENSG00000168878.12	SFTPB	0.999257	Lung	0	0	1191.7	0.117784	0.0841055	5.10394	0.008025
chr2	85912298	85925977	+	ENSG00000115523.12	GNLY	0.908186	Lung	1.79488	0.519654	19.846	3.685	1.88028	1.75234	1.30067
chr2	87229682	87248975	-	ENSG00000183281.10	PLGLB1	0.972466	Liver	1.64957	4.16404	2.12303	1.60696	89.8278	3.29226	2.00393
chr2	88047606	88058312	+	ENSG00000125551.14	PLGLB2	0.989333	Liver	0.983467	2.17838	1.02959	0.610398	112.555	1.38697	1.01464
chr2	88367299	88412906	+	ENSG00000115593.10	SMYD1	0.925149	Stomach	0	0.307574	0	11.0008	0	0	4.63295
chr2	88422510	88427635	-	ENSG00000163586.5	FABP1	0.924284	Liver	0	0.0707665	0.072659	5.34812	467.397	0.154477	206.691
chr2	95691422	95719737	+	ENSG00000172005.6	MAL	0.989329	Esophagus	935.735	33.7824	8.3887	5.3075	0.170718	8.21679	4.04671
chr2	100889753	100939195	-	ENSG00000170500.8	LONRF2	0.885706	Brain	1.10221	22.9595	1.73808	4.73562	0.613797	4.17581	3.37924
chr2	101962013	102004057	-	ENSG00000175874.5	CREG2	0.998351	Brain	0.072306	32.7336	0.096391	0.079344	0.008353	0.0034235	0.0641235
chr2	102927962	102968497	+	ENSG00000115602.12	IL1RL1	0.923189	Lung	5.23201	0.0787825	28.9505	3.82043	0.606861	0.499011	3.10525
chr2	103236166	103327777	+	ENSG00000115616.2	SLC9A2	0.942193	Intestine	0.249876	0.800692	0.068947	4.94699	0.006075	0.676176	19.4578
chr2	105471969	105476929	+	ENSG00000198914.2	POU3F3	0.998042	Brain	0.006062	19.5859	0.003187	0.013171	0	0	0.207626
chr2	107418056	107503564	-	ENSG00000144057.11	ST6GAL2	0.910572	Thyroid	2.08352	7.60878	0.753377	0.623012	2.01068	29.5463	2.77417
chr2	108905095	108926371	+	ENSG00000198203.5	SULT1C2	0.922513	Stomach	0.342332	0.376416	2.21799	30.187	0.28919	9.33431	1.47435
chr2	113763038	113765621	+	ENSG00000136694.8	IL36A	1	Esophagus	210.284	0	0	0	0	0	0
chr2	113864791	113891593	+	ENSG00000136689.14	IL1RN	0.982083	Esophagus	348.067	0.0912125	7.61192	11.7931	14.603	1.49165	1.82603
chr2	113973574	114036527	-	ENSG00000125618.12	PAX8	0.998339	Thyroid	0.775563	0.26268	1.33215	0.777567	0.363289	443.649	0.910346
chr2	115199876	116603328	+	ENSG00000175497.12	DPP10	0.969295	Brain	0.0467705	22.4706	0.091102	1.25418	0.188549	0.029789	2.5294
chr2	119981384	120023228	+	ENSG00000115107.15	STEAP3	0.904121	Liver	2.13649	1.02842	5.9863	4.11707	37.8988	3.13297	5.40098
chr2	120124497	120130126	+	ENSG00000155368.12	DBI	0.912024	Esophagus	204.129	36.2312	15.0928	12.633	23.8855	11.6808	8.22768
chr2	128176003	128186822	+	ENSG00000115718.13	PROC	0.999095	Liver	0.024449	0.0833635	0.06452	0.320953	135.466	0.10863	0.133452
chr2	128293378	128395304	+	ENSG00000169994.14	MYO7B	0.988813	Intestine	0.0401955	0.107485	0.95238	0.452782	0.437497	0.224901	33.0033
chr2	135596117	135659604	+	ENSG00000153086.9	ACMSD	0.999544	Liver	0	0.007102	0.025599	0.037583	34.1677	0.022979	0.000299
chr2	140988992	142889270	-	ENSG00000168702.12	LRP1B	0.861903	Brain	0.258358	18.6281	0.123974	0.590192	0.067138	14.014	0.381306
chr2	149632819	149883273	+	ENSG00000168280.12	KIF5C	0.990025	Brain	0.357961	73.2998	0.282502	0.909953	0.140153	0.538451	2.15785
chr2	152689290	152955593	-	ENSG00000182389.14	CACNB4	0.941984	Brain	2.48866	22.1589	2.57049	0.760435	0.110733	1.20935	0.573778
chr2	155554811	155714863	+	ENSG00000162989.3	KCNJ3	0.97413	Brain	0.0128715	12.2263	0.105418	0.18739	0.992652	0.0166365	0.58283
chr2	158175137	158184225	-	ENSG00000136541.10	ERMN	0.997824	Brain	0.27713	74.6621	0.2033	0.158557	0.085373	0.0452305	0.205135
chr2	159651829	159719293	+	ENSG00000163331.6	DAPL1	0.993341	Esophagus	96.0431	0.211398	0.060298	0.112866	0	3.36114	0.091445
chr2	160788519	160919121	-	ENSG00000153246.7	PLA2R1	0.929945	Thyroid	8.12429	0.830059	4.08086	2.66223	1.23114	53.0307	5.36178
chr2	162272605	162282381	+	ENSG00000136535.10	TBR1	0.999651	Brain	0	16.3407	0.007563	0.006892	0.0027545	0.014365	0.0026255
chr2	162280843	162841792	+	ENSG00000144290.12	SLC4A10	0.992794	Brain	0.068414	40.3948	0.155564	0.137512	0.23688	0.042069	1.10617
chr2	162999392	163008914	-	ENSG00000115263.10	GCG	0.999483	Intestine	0	0	0	0.065317	0	0	21.067
chr2	165349322	165478358	-	ENSG00000115290.5	GRB14	0.931092	Liver	1.00248	1.00843	1.14125	0.99361	20.7204	2.6989	1.7222
chr2	165944032	166060577	-	ENSG00000153253.11	SCN3A	0.942624	Brain	0.939947	13.0282	0.345954	0.781076	0.0668805	1.21208	1.13904
chr2	166095912	166248818	+	ENSG00000136531.9	SCN2A	0.99576	Brain	0.100724	31.743	0.166293	0.173669	0.054156	0.0409615	0.271807
chr2	166326157	166545917	+	ENSG00000178662.11	CSRNP3	0.907241	Brain	1.21694	17.3174	0.990712	1.33408	0.568361	3.23348	2.29448
chr2	166845670	166984523	-	ENSG00000144285.11	SCN1A	0.977391	Brain	0	25.6502	3.4357	0.013855	0.000418	0	0.029543
chr2	169779448	169887832	-	ENSG00000073734.8	ABCB11	0.997801	Liver	0.0348925	0.0205275	0.020253	0.068971	24.4262	0.0333375	0.144346
chr2	169983619	170219195	-	ENSG00000081479.8	LRP2	0.968534	Thyroid	0.0042615	6.53202	3.02648	0.026637	0.107969	51.3705	0.001127
chr2	171669723	171717661	+	ENSG00000128683.9	GAD1	0.996354	Brain	0.537497	34.9119	0.050631	0.040763	0.0127125	0.078185	0.043934
chr2	173600002	173917621	+	ENSG00000091428.13	RAPGEF4	0.931316	Brain	3.89001	67.2234	9.40675	1.91781	6.59118	4.53191	1.36518
chr2	174219548	174233725	+	ENSG00000144354.9	CDCA7	0.919953	Intestine	3.30941	0.649154	0.578669	0.9566	0.127518	0.33471	12.4012
chr2	175664091	175870097	-	ENSG00000128656.9	CHN1	0.967611	Brain	4.77312	173.204	14.1716	6.44186	0.73736	4.15796	3.37756
chr2	176973518	176984670	+	ENSG00000128710.5	HOXD10	0.994162	Intestine	0.360933	0	0.030679	0.010567	0.0073015	0.023231	12.353
chr2	187558698	187630685	+	ENSG00000144369.8	FAM171B	0.960876	Brain	1.89599	46.5003	1.78558	3.0888	0.35985	1.68039	2.10503
chr2	188207856	188313187	-	ENSG00000064989.8	CALCRL	0.90804	Lung	11.1293	4.30025	122.264	9.08565	6.91689	29.3127	6.7158
chr2	192813769	193060435	-	ENSG00000144339.7	TMEFF2	0.988151	Brain	0.234295	14.2954	0.06612	0.237639	0.009208	0.0642645	0.404792
chr2	198432948	198540769	-	ENSG00000162944.6	RFTN2	0.887436	Brain	1.57213	13.1584	2.59069	1.61853	0.56543	1.52479	1.01543
chr2	200134223	200335989	-	ENSG00000119042.12	SATB2	0.884114	Intestine	1.02715	18.6345	0.994165	1.12194	1.70012	1.05334	35.2808
chr2	201450591	201541787	+	ENSG00000138356.9	AOX1	0.981117	Liver	3.92938	0.30625	8.97082	4.61371	223.9	4.86817	2.67915
chr2	207308263	207485851	+	ENSG00000114948.8	ADAM23	0.925233	Brain	1.82632	11.7898	0.613649	1.19481	0.123231	0.426275	1.10463
chr2	210288782	210598842	+	ENSG00000078018.15	MAP2	0.968968	Brain	3.98131	223.147	17.0567	2.62471	2.35805	13.5412	1.98607
chr2	210636717	210864024	+	ENSG00000144406.14	UNC80	0.988974	Brain	0.026643	21.6838	0.128481	0.227086	0.019637	0.75823	0.274432
chr2	211342406	211543831	+	ENSG00000021826.10	CPS1	0.997344	Liver	2.34563	1.73619	1.88862	1.95166	682.589	2.27009	0.687448
chr2	212240446	213403565	-	ENSG00000178568.9	ERBB4	0.938582	Brain	0.162287	15.7367	1.62172	0.244418	0.0593405	3.64225	0.069062
chr2	216861052	216947678	-	ENSG00000115425.9	PECR	0.894401	Liver	2.6804	3.97012	5.43667	3.63501	44.4278	7.25623	5.17084
chr2	219246752	219261617	+	ENSG00000018280.12	SLC11A1	0.93437	Lung	1.04747	1.93581	20.204	2.42877	0.87217	1.14503	0.526629
chr2	219283815	219318018	+	ENSG00000127831.6	VIL1	0.975506	Intestine	0.004895	0.0124105	0.025803	1.63091	2.38071	0.02175	27.7379
chr2	219646472	219680016	+	ENSG00000135929.4	CYP27A1	0.914241	Liver	3.28605	9.61625	42.9914	8.0507	161.275	7.81524	11.2251
chr2	219824377	219826876	+	ENSG00000171450.4	CDK5R2	0.995833	Brain	0	13.8699	0	0.103445	0	0	0.243345
chr2	219919142	219925189	-	ENSG00000163501.6	IHH	0.938306	Intestine	0.0478355	0.0282925	1.59597	3.44094	0.625389	0.084499	15.7308
chr2	220154345	220174370	-	ENSG00000054356.9	PTPRN	0.990487	Brain	0.0056575	42.5992	0.019722	1.00571	0.0017275	0.027482	1.37116
chr2	220492049	220506702	+	ENSG00000114923.12	SLC4A3	0.912336	Brain	1.28333	11.1401	0.398584	2.17522	0.12371	0.967357	0.911269
chr2	224461658	224467221	-	ENSG00000171951.4	SCG2	0.925276	Brain	0.09984	17.5263	0.239165	3.27876	0.0066405	0.144837	4.0886
chr2	228678558	228682272	+	ENSG00000115009.7	CCL20	0.908588	Intestine	2.38551	0.019783	1.15852	3.36528	0.580284	0.198957	14.0542
chr2	230222345	230579274	-	ENSG00000187957.7	DNER	0.98588	Brain	0.173055	42.3532	0.448597	1.33611	0.0142575	0.0633895	1.55286
chr2	232260254	232265875	+	ENSG00000156966.6	B3GNT7	0.932881	Intestine	0.755541	1.28211	15.3122	10.3476	1.07468	1.50593	75.1854
chr2	233470767	233547491	+	ENSG00000115468.7	EFHD1	0.910961	Brain	2.2911	37.8919	3.08534	3.85066	4.90097	4.54196	1.57305
chr2	233743396	233877982	-	ENSG00000066248.10	NGEF	0.926449	Brain	2.4937	39.2048	0.093858	2.97472	5.92704	0.302308	5.50979
chr2	234526291	234681956	+	ENSG00000241635.3	UGT1A1	0.913059	Liver	2.04412	0	0.053497	0.81067	18.8273	0.0233485	6.88954
chr2	234580499	234681946	+	ENSG00000241119.1	UGT1A9	0.995605	Liver	0.282099	0	0	0.335559	46.2168	0	0.601047
chr2	234590584	234681945	+	ENSG00000244122.2	UGT1A7	0.987071	Esophagus	24.9651	0	0.009797	0.411526	0.858707	0	0.656655
chr2	234600253	234681946	+	ENSG00000167165.14	UGT1A6	0.924734	Liver	7.51846	0	0.264653	2.08004	23.9638	0.046202	0.912644
chr2	234627424	234681945	+	ENSG00000244474.1	UGT1A4	0.997763	Liver	0.891881	0	0.073845	0.425155	119.133	0.0220045	0.186474
chr2	234637754	234681945	+	ENSG00000243135.1	UGT1A3	0.990633	Liver	0.590537	0	0.027	0.108693	15.1944	0	0.127763
chr2	234668894	234681945	+	ENSG00000242366.2	UGT1A8	0.997267	Liver	0	0	0	0.482532	34.9252	0	0.090171
chr2	234959323	234985778	+	ENSG00000072080.6	SPP2	0.999982	Liver	0	0	0	0.010898	99.7332	0	0
chr2	237232794	237416185	-	ENSG00000132321.12	IQCA1	0.912282	Thyroid	0.490557	3.69872	1.81875	0.259218	0.075493	12.2317	0.0948855
chr2	239146908	239149303	-	ENSG00000144485.6	HES6	0.858116	Brain	0.453523	11.1056	0.981581	2.07958	0.65207	0.989341	4.29818
chr2	241078446	241083979	-	ENSG00000178602.3	OTOS	0.997897	Thyroid	0	0.219715	0	0	0	17.4131	0
chr2	241544848	241570676	+	ENSG00000178623.7	GPR35	0.907873	Intestine	0.817882	0.796044	1.33309	5.30409	0.417639	0.813901	17.1551
chr2	241653181	241759725	-	ENSG00000130294.10	KIF1A	0.995567	Brain	0.021812	146.569	0.038178	1.29221	0.225145	0.565542	1.75573
chr2	241807896	241819919	+	ENSG00000172482.4	AGXT	0.999771	Liver	0	0	0.029293	0.335401	519.37	0.08361	0.26451
chr2	241825465	241836306	-	ENSG00000172478.13	C2orf54	0.954561	Esophagus	35.3447	0	6.94993	0.371883	0.943723	0.0115865	1.35913
chr2	242749920	242758739	+	ENSG00000204099.7	NEU4	0.860144	Intestine	0.0160845	3.27049	0.181484	0.253835	9.45458	0.146959	15.8776
chr3	238279	451090	+	ENSG00000134121.5	CHL1	0.897656	Brain	7.94902	49.3545	4.66725	7.46917	0.156712	0.720942	9.34375
chr3	3841121	3889387	+	ENSG00000175928.5	LRRN1	0.914483	Brain	0.715947	13.241	1.79687	0.770687	0.436196	2.65539	0.418934
chr3	8543393	8609805	+	ENSG00000071282.7	LMCD1	0.890086	Lung	10.4724	2.01488	54.7979	9.22326	3.89548	7.10919	3.4231
chr3	9022275	9404737	-	ENSG00000196220.11	SRGAP3	0.856111	Brain	4.28891	27.2243	2.76737	2.54444	1.73406	8.87716	3.29177
chr3	10365707	10749716	-	ENSG00000157087.12	ATP2B2	0.965976	Brain	0.080304	39.5966	0.032767	0.225407	7.6704	0.0273235	0.04712
chr3	11034410	11080933	+	ENSG00000157103.6	SLC6A1	0.87131	Brain	1.9392	58.0672	1.017	0.372062	40.9513	0.272018	0.284363
chr3	12775024	12810956	-	ENSG00000088726.11	TMEM40	0.999209	Esophagus	47.4854	0.009129	0.200924	0.005503	0.0097355	0	0
chr3	16216156	16273499	+	ENSG00000131386.13	GALNT15	0.858632	Brain	2.46531	11.7586	1.61742	2.10367	0.967972	1.09055	1.72885
chr3	35680437	35835988	+	ENSG00000172995.12	ARPP21	0.996574	Brain	0.0180185	45.0131	0.029979	0.110854	0.610321	0.0305065	0.125712
chr3	38144620	38178733	-	ENSG00000060971.13	ACAA1	0.88732	Liver	20.7942	17.8665	24.9042	17.9602	202.026	23.0787	31.9813
chr3	39304985	39323226	-	ENSG00000168329.9	CX3CR1	0.866515	Brain	0.955593	19.3466	9.10547	1.36174	1.03924	1.91361	1.11923
chr3	39508689	39570970	+	ENSG00000168314.13	MOBP	0.999764	Brain	0.018746	146.238	0.029655	0.03874	0.002351	0.0225685	0.094898
chr3	42299317	42307699	-	ENSG00000187094.7	CCK	0.990552	Brain	0	36.4535	0.508324	1.3862	0.040095	0	0.13194
chr3	42734155	42744319	-	ENSG00000010282.10	HHATL	0.966041	Brain	0	25.6781	0.111812	0.043387	0.025359	5.02057	0.030861
chr3	42897497	42917633	-	ENSG00000180432.4	CYP8B1	0.999791	Liver	0	0.006454	0.012374	0.051973	96.3911	0.041223	0.0087515
chr3	46556913	46621589	-	ENSG00000163827.8	LRRC2	0.900051	Thyroid	0.379545	1.83806	0.700642	1.09646	1.76209	11.5573	1.15408
chr3	47603729	47622282	-	ENSG00000114646.5	CSPG5	0.99047	Brain	0.115063	18.7255	0.229673	0.359777	0.023852	0.126122	0.216178
chr3	48601506	48632700	-	ENSG00000114270.11	COL7A1	0.942719	Esophagus	15.9743	1.42164	0.650137	1.46754	0.332116	0.268221	1.35048
chr3	49591922	49708978	+	ENSG00000164061.4	BSN	0.987984	Brain	0.0695455	26.4783	0.31619	0.248349	0.406268	0.574526	0.294109
chr3	49721380	49726934	-	ENSG00000173531.11	MST1	0.975163	Liver	1.35394	2.3851	1.91234	1.62122	119.987	8.47822	2.13019
chr3	49895421	49907655	-	ENSG00000164076.12	CAMKV	0.999673	Brain	0	26.1744	0.00495	0.031701	0	0.003788	0.010882
chr3	50337320	50349812	-	ENSG00000114378.12	HYAL1	0.901648	Liver	0.654876	0.332907	5.89619	1.67579	16.9437	0.800088	0.638849
chr3	50400233	50541675	-	ENSG00000007402.7	CACNA2D2	0.962045	Lung	0.304872	3.17214	36.3693	1.31222	0.219305	1.71172	1.56208
chr3	50712672	51421629	+	ENSG00000088538.12	DOCK3	0.892558	Brain	1.11763	17.5321	0.292772	1.9357	0.024987	6.94838	0.982638
chr3	52009066	52023213	+	ENSG00000243989.3	ACY1	0.892128	Liver	3.90063	3.48204	6.27492	9.71295	76.3501	12.519	13.5267
chr3	52321105	52329272	+	ENSG00000168237.13	GLYCTK	0.951862	Liver	2.01231	2.53907	6.16416	6.54367	109.517	4.82146	9.55129
chr3	52811603	52826078	+	ENSG00000055957.6	ITIH1	0.999804	Liver	0.0469895	0	0.106759	0.289204	519.478	0.110806	0.056114
chr3	52828784	52843025	+	ENSG00000162267.8	ITIH3	0.997133	Liver	0.943941	0.0630975	2.23172	1.20089	316.7	0.553987	0.453493
chr3	52846991	52865495	-	ENSG00000055955.11	ITIH4	0.997586	Liver	1.96379	1.94613	2.07964	1.28387	714.044	2.0035	1.06541
chr3	52847298	52869745	-	ENSG00000243696.4	RP5-966M1.6	0.967752	Liver	0.638302	1.93299	2.10944	1.32927	48.3599	2.20475	1.14226
chr3	55542336	56502391	-	ENSG00000187672.8	ERC2	0.991375	Brain	0.172262	17.5176	0.156867	0.11439	0.0047155	0.333408	0.124933
chr3	58177984	58200424	-	ENSG00000163687.9	DNASE1L3	0.891363	Liver	12.6718	0	4.02199	2.57218	51.5342	5.1684	9.15684
chr3	58490863	58523046	-	ENSG00000168306.8	ACOX2	0.873817	Liver	4.03956	1.65016	6.8168	7.7672	62.1615	16.8554	9.93336
chr3	58549844	58613337	-	ENSG00000168309.12	FAM107A	0.949073	Brain	3.22068	180.496	25.9475	6.12804	1.00387	14.3519	4.50073
chr3	58619673	58652575	-	ENSG00000198643.2	FAM3D	0.905995	Intestine	60.8611	0	1.51361	25.5096	0.030015	0.40381	156.583
chr3	62384022	62861054	-	ENSG00000163618.13	CADPS	0.978606	Brain	0.506319	37.1996	0.651384	1.09093	0.138162	0.211003	2.17718
chr3	63213991	63602597	+	ENSG00000163630.6	SYNPR	0.993354	Brain	0	17.4037	0	0.265487	0	0.252543	0.176011
chr3	85008132	86123579	+	ENSG00000175161.9	CADM2	0.986515	Brain	0.423604	45.9059	0.162114	0.954502	0.178639	0.288278	1.70718
chr3	86987119	87040269	-	ENSG00000206538.3	VGLL3	0.88919	Lung	2.61291	0.119599	18.7461	3.13355	0.457145	1.7428	4.39748
chr3	98250743	98251960	+	ENSG00000154165.3	GPR15	0.964989	Intestine	3.219	0	0.147075	0.455632	0.205192	0.055857	19.4357
chr3	108015376	108097132	+	ENSG00000114455.9	HHLA2	0.982844	Intestine	0.0124085	0.0402115	1.0253	3.1176	0.018612	0.031898	41.2499
chr3	111311747	111314290	-	ENSG00000177494.5	ZBED2	0.928422	Thyroid	8.93501	0	4.98912	0.040093	0.0230405	32.7457	0.0760375
chr3	111717511	111732734	+	ENSG00000144834.8	TAGLN3	0.99268	Brain	0.020995	49.3619	0.050576	0.67789	0	0.0577965	1.36061
chr3	115342171	115440337	+	ENSG00000172020.8	GAP43	0.992322	Brain	0.135725	56.6581	0.012105	1.18985	0	0.033572	1.23891
chr3	115521235	117716095	-	ENSG00000185565.7	LSAMP	0.919421	Brain	2.27357	42.0428	7.88039	3.336	0.133941	0.813486	5.88924
chr3	118619404	118864915	-	ENSG00000144847.8	IGSF11	0.949093	Brain	1.33714	16.7054	0.083095	2.14557	0.029737	0.244167	1.26281
chr3	119355304	119384171	-	ENSG00000121577.9	POPDC2	0.879603	Intestine	0.795081	0.571157	1.78272	9.70727	0.43064	2.61078	22.0073
chr3	119499331	119537332	+	ENSG00000144852.12	NR1I2	0.954759	Liver	0.0128935	0.066716	0.073578	1.33374	39.1447	0.0861965	9.05259
chr3	120347020	120401418	-	ENSG00000113924.7	HGD	0.970592	Liver	0.11885	0.133125	0.571647	3.25109	187.977	23.3102	5.78276
chr3	120626919	121143608	+	ENSG00000145087.8	STXBP5L	0.939062	Brain	0.0825485	18.1237	0.003842	0.186143	0	5.59896	0.755059
chr3	122044091	122060819	+	ENSG00000121552.3	CSTA	0.999642	Esophagus	4027.42	0.050364	4.34163	1.90862	1.65468	0.266678	0.438402
chr3	124624289	124672663	-	ENSG00000173702.3	MUC13	0.986341	Intestine	0.011706	0.032445	0.080706	9.15203	0.237688	0.0281035	116.44
chr3	124801480	124998021	-	ENSG00000221955.6	SLC12A8	0.884082	Thyroid	2.97504	2.74094	2.96419	2.36964	3.53341	26.9173	4.138
chr3	125822412	125916837	-	ENSG00000144908.9	ALDH1L1	0.973545	Liver	2.05385	12.9821	0.535016	1.59268	128.396	0.69209	2.52457
chr3	126200124	126236616	-	ENSG00000159650.4	UROC1	0.999589	Liver	0	0.038306	0.02651	0.014485	41.1532	0.018665	0.0034115
chr3	126243126	126262134	+	ENSG00000180767.5	CHST13	0.9806	Liver	0.0870655	0.110773	0.483681	0.291976	14.0146	0.0888145	0.568963
chr3	127348024	127391652	+	ENSG00000114631.10	PODXL2	0.906544	Brain	1.26002	21.5765	1.16157	2.49874	0.569303	2.9637	3.64543
chr3	128198270	128212028	-	ENSG00000179348.7	GATA2	0.875829	Lung	4.56065	0.733525	19.1183	3.69168	0.565027	2.0074	2.68542
chr3	130279178	130396999	+	ENSG00000206384.6	COL6A6	0.985426	Lung	0.794789	0.030083	16.4355	0.033128	0.391622	0.163033	0.024551
chr3	132036211	132087142	+	ENSG00000014257.11	ACPP	0.932207	Esophagus	23.7547	0.365038	3.72674	1.85687	0.2175	1.1787	2.31757
chr3	133464800	133497850	+	ENSG00000091513.10	TF	0.991901	Liver	5.59568	163.491	1.00124	2.07621	3584.48	1.00045	1.00988
chr3	133543083	133614680	-	ENSG00000154917.6	RAB6B	0.961252	Brain	1.16113	58.9527	1.59078	5.2146	0.206938	2.75541	2.777
chr3	136665072	136729927	+	ENSG00000174564.8	IL20RB	0.982318	Esophagus	27.3167	0.223429	0.710174	0.555479	0.653748	0.336072	0.419135
chr3	137717577	137752494	+	ENSG00000066405.8	CLDN18	0.935382	Lung	0	0	146.739	56.6891	0.087295	0.079448	0.0361755
chr3	139654027	140296239	+	ENSG00000158258.11	CLSTN2	0.902791	Brain	1.24882	14.999	1.88574	1.72875	0.860456	1.85752	1.16689
chr3	142315229	142432506	+	ENSG00000120756.8	PLS1	0.887328	Intestine	6.93069	0.882798	6.87762	19.6023	6.9376	3.02272	65.4613
chr3	148880197	148939842	-	ENSG00000047457.9	CP	0.991056	Liver	6.23564	0.689304	3.83736	3.25561	473.205	5.79788	5.57732
chr3	149191761	149221068	+	ENSG00000169903.6	TM4SF4	0.994791	Liver	0.062513	0	0.210419	1.70754	92.614	0.245802	0.668053
chr3	151011891	151034740	-	ENSG00000138271.4	GPR87	0.999396	Esophagus	18.0579	0.024169	0.038301	0	0	0.0029405	0
chr3	151055168	151102600	-	ENSG00000169313.9	P2RY12	0.956086	Brain	0.785303	26.017	2.12535	0.915356	1.22851	0.581349	1.21915
chr3	151143172	151176497	-	ENSG00000152580.8	IGSF10	0.870028	Lung	4.28008	0.412092	13.3777	1.3476	0.383319	2.64904	1.36021
chr3	151531825	151546276	+	ENSG00000114771.9	AADAC	0.986356	Liver	1.27288	0	2.81915	7.48949	143.72	0.12658	0.0577505
chr3	151591431	151602405	+	ENSG00000198829.5	SUCNR1	0.925776	Thyroid	0.271213	0.41245	1.45802	0.330646	2.03284	10.8363	0.320715
chr3	154741913	154901497	+	ENSG00000196549.6	MME	0.900294	Lung	1.07584	0.464422	41.6628	5.13474	14.7832	1.58771	1.87832
chr3	156977531	157251408	-	ENSG00000197415.7	VEPH1	0.98205	Lung	0.044663	0.121333	18.5817	0.188681	0.539913	0.619408	0.48723
chr3	164696686	164796283	-	ENSG00000090402.3	SI	0.99916	Intestine	0	0.0037685	0.002685	0.104227	0.006702	0	23.2924
chr3	167453031	167543356	+	ENSG00000163536.8	SERPINI1	0.963646	Brain	2.52016	53.443	2.24002	1.51605	0.48284	3.61108	1.28692
chr3	169556967	169587718	-	ENSG00000114248.5	LRRC31	0.9373	Intestine	0.0515465	0	0.585399	1.93978	1.34537	0.017478	10.472
chr3	170136653	170578169	+	ENSG00000013297.6	CLDN11	0.950028	Brain	4.94567	75.4837	8.36608	2.68062	2.79728	1.12058	2.72227
chr3	170177372	170303863	-	ENSG00000013293.5	SLC7A14	0.983766	Brain	0.0037315	10.7786	0.005746	0.40476	0.0081755	0.0026205	0.62486
chr3	170714137	170744539	-	ENSG00000163581.9	SLC2A2	0.999828	Liver	0	0.001482	0.019678	0.212131	260.3	0.0359265	0
chr3	173114074	174004434	+	ENSG00000169760.13	NLGN1	0.88091	Brain	2.57212	14.8027	0.449632	4.0998	0.0214615	0.600432	2.83368
chr3	179512746	179754841	-	ENSG00000114757.14	PEX5L	0.999304	Brain	0.003755	35.9432	0.029328	0.039613	0	0.055675	0.021769
chr3	181429714	181432221	+	ENSG00000181449.2	SOX2	0.910809	Brain	13.8678	31.1779	0.826413	1.3606	0.017251	0.084498	0.528222
chr3	182840001	182881627	-	ENSG00000078081.3	LAMP3	0.982645	Lung	2.68297	0.057453	60.1766	0.842104	0.235283	1.36788	1.08055
chr3	182895831	183146566	-	ENSG00000053524.7	MCF2L2	0.954428	Brain	1.08805	16.1085	0.853969	0.601954	0.0787705	0.493392	1.28842
chr3	183533664	183543382	-	ENSG00000180834.3	MAP6D1	0.967331	Brain	0.70991	21.843	0.844512	0.755256	0.346409	0.734803	0.890652
chr3	184908412	184999778	-	ENSG00000113790.6	EHHADH	0.953636	Liver	3.83224	2.24265	3.81001	3.77459	101.351	5.90017	8.63436
chr3	186330712	186339107	+	ENSG00000145192.8	AHSG	0.999804	Liver	0.031977	0.0696395	0.217905	0.912288	1413.4	0.387694	0.044525
chr3	186353758	186370930	+	ENSG00000090512.7	FETUB	0.992685	Liver	1.93052	0.074913	0	0.029297	48.1541	0	0.0787775
chr3	186378005	186396029	+	ENSG00000113905.4	HRG	0.999864	Liver	0	0	0.050364	0.501161	738.113	0.0396435	0.0106225
chr3	186435065	186461743	+	ENSG00000113889.7	KNG1	0.999706	Liver	0	0.020125	0.088534	0.416419	463.52	0.0779955	0.213758
chr3	186648274	186796341	+	ENSG00000073849.10	ST6GAL1	0.853387	Liver	11.7937	23.3846	36.7626	13.7422	170.852	33.9642	30.6476
chr3	186935942	187009810	-	ENSG00000127241.12	MASP1	0.916163	Liver	2.69981	5.16043	8.25489	0.902379	67.9667	1.71743	15.4536
chr3	189349205	189615068	+	ENSG00000073282.8	TP63	0.988456	Esophagus	35.9328	0.074164	1.41141	0.18064	0.1186	0.457238	0.246872
chr3	190023490	190040264	-	ENSG00000163347.5	CLDN1	0.93123	Liver	16.0528	0.362482	3.1991	1.17806	73.8843	9.13443	0.559218
chr3	191857184	192485553	-	ENSG00000114279.9	FGF12	0.974659	Brain	0.39346	28.6145	0.970395	0.283512	0.164249	2.11067	0.428424
chr3	194060494	194072057	-	ENSG00000178772.6	CPN2	0.999791	Liver	0	0	0.012782	0.042202	54.3448	0.0132055	0
chr3	195473636	195539148	-	ENSG00000145113.17	MUC4	0.949269	Intestine	1.88224	0.007886	0.454052	1.07517	0.0211955	0.016931	11.3588
chr3	195938358	195970049	+	ENSG00000163959.5	SLC51A	0.987196	Liver	0.197153	0.125009	0.419978	0.319825	34.637	1.06033	0.538671
chr3	196673214	196695931	-	ENSG00000119227.3	PIGZ	0.873684	Intestine	2.07422	4.07566	2.57306	2.17159	0.949273	0.965257	16.9008
chr3	197236654	197300194	-	ENSG00000161267.7	BDH1	0.882377	Liver	12.3245	15.8961	1.99499	6.13514	97.6695	12.5406	20.0379
chr3	197676858	197683481	+	ENSG00000182899.10	RPL35A	0.89332	Esophagus	377.377	26.5544	40.9513	68.2792	26.4758	49.0555	30.2354
chr4	666225	668127	-	ENSG00000169020.5	ATP5I	0.928839	Esophagus	99.7244	9.11493	4.6004	10.6451	6.52589	7.37859	4.3137
chr4	778745	819986	-	ENSG00000168993.10	CPLX1	0.975758	Brain	0.938318	32.0918	1.00537	0.798341	0.723237	0.668691	0.533874
chr4	972861	987228	-	ENSG00000145217.9	SLC26A1	0.932096	Liver	0.0797165	1.20831	0.761324	0.534852	11.1212	0.985686	0.961118
chr4	2061239	2070816	+	ENSG00000185818.7	NAT8L	0.989494	Brain	0.0634065	35.3136	0.134572	0.367677	0.058142	1.2327	0.369551
chr4	3443614	3451211	+	ENSG00000109758.4	HGFAC	0.998185	Liver	0.0338175	0.626306	0.083952	0.112858	94.4548	0.097169	0.074735
chr4	4349867	4420785	+	ENSG00000168824.10	NSG1	0.866362	Brain	4.25149	10.1078	0.321308	1.18242	0.0567255	0.238729	2.05404
chr4	5749811	5894785	-	ENSG00000072832.10	CRMP1	0.958008	Brain	0.702244	28.9252	2.94765	1.24241	0.148592	0.694611	1.55222
chr4	6322305	6565327	-	ENSG00000074211.9	PPP2R2C	0.967473	Brain	11.997	66.3659	0.04886	0.293437	0.0087905	0.0784355	0.525514
chr4	15937192	15940363	-	ENSG00000137440.3	FGFBP1	0.989874	Esophagus	65.7089	0	0.455643	0.233766	0	0.347502	2.95531
chr4	20730239	21950422	-	ENSG00000185774.10	KCNIP4	0.948864	Brain	1.10735	24.5054	0.097326	0.543162	0.0238015	1.70845	4.03854
chr4	25656923	25680370	+	ENSG00000157765.7	SLC34A2	0.994926	Lung	0.717894	0.0109625	340.76	0.451213	1.01314	8.17638	0.0049175
chr4	41258430	41270472	+	ENSG00000154277.8	UCHL1	0.972777	Brain	1.77283	127.969	1.63159	5.03441	0.200482	2.84827	9.41427
chr4	41361624	41702061	+	ENSG00000064042.13	LIMCH1	0.859486	Lung	9.18833	43.7179	132.241	6.4619	5.06918	40.7122	6.34081
chr4	46037786	46126098	-	ENSG00000163285.7	GABRG1	0.997379	Brain	0.011902	12.5971	0	0.018771	0.0215665	0.12378	0.0221065
chr4	46250444	46477247	-	ENSG00000151834.11	GABRA2	0.981919	Brain	0.292122	40.1519	0.050733	0.965055	0.0077775	0.0438785	2.99628
chr4	46920917	46996424	-	ENSG00000109158.6	GABRA4	0.995743	Brain	0.156042	10.4529	0.004517	0.033825	0.003297	0.002114	0.0671985
chr4	46995740	47428461	+	ENSG00000163288.9	GABRB1	0.997224	Brain	0.0163165	19.0488	0	0.115619	0	0.0311645	0.154141
chr4	56461396	56502865	-	ENSG00000109255.7	NMU	0.992457	Esophagus	25.8155	0.614949	0.028536	0.345469	0	0.0153755	0.164079
chr4	62066976	62944053	+	ENSG00000150471.11	LPHN3	0.900492	Brain	1.34138	24.3953	3.6615	4.66357	0.231067	0.485821	4.18187
chr4	68686594	68749750	-	ENSG00000153802.7	TMPRSS11D	0.99998	Esophagus	83.5437	0.001227	0.00045	0	0	0.00589	0.002316
chr4	68775103	68829858	-	ENSG00000187054.10	TMPRSS11A	0.999979	Esophagus	47.9357	0.0030195	0	0	0	0.003033	0
chr4	69092371	69111438	-	ENSG00000185873.7	TMPRSS11B	1	Esophagus	297.061	0	0	0	0	0	0
chr4	69313167	69363322	+	ENSG00000087128.5	TMPRSS11E	0.999957	Esophagus	89.5413	0	0.011033	0	0	0	0.011916
chr4	69512348	69536346	-	ENSG00000196620.4	UGT2B15	0.997769	Liver	0	0	0.024951	0.913492	72.3671	0.006753	0.023483
chr4	69681711	69696914	+	ENSG00000109181.7	UGT2B10	0.999864	Liver	0	0	0	0.032583	112.677	0.002925	0.0566865
chr4	69917081	69978705	+	ENSG00000171234.9	UGT2B7	0.99862	Liver	0.0195015	0	0.271241	0.307994	323.468	0.117103	1.96199
chr4	70345883	70391732	-	ENSG00000156096.8	UGT2B4	0.999102	Liver	0	0	0.979069	0.232149	237.146	0.0568835	0.01029
chr4	70586880	70653679	-	ENSG00000173597.4	SULT1B1	0.943575	Intestine	0.528861	0.242665	1.29384	11.1165	5.83537	0.205526	56.78
chr4	71091788	71100969	+	ENSG00000181617.5	FDCSP	0.990786	Esophagus	13.0244	0	0	0.104918	0	0.0219115	0.593182
chr4	71521258	71547534	-	ENSG00000132465.6	IGJ	0.85501	Intestine	269.637	0.0603905	163.28	1083.39	35.3587	19.9261	1806.62
chr4	72607410	72669758	-	ENSG00000145321.8	GC	0.999687	Liver	0	0	0.065194	2.46539	1420.15	0.101824	0.031855
chr4	74262831	74287129	+	ENSG00000163631.12	ALB	0.99991	Liver	0.014017	0.178332	1.04823	15.5606	38059.2	2.74476	1.01702
chr4	74347400	74369691	+	ENSG00000079557.3	AFM	0.999866	Liver	0	0	0.013451	0.120393	196.037	0.0233905	0
chr4	75174190	75181024	+	ENSG00000182585.5	EPGN	0.997631	Esophagus	28.0971	0.0846305	0.21508	0.01911	0.0295665	0.0255995	0.025344
chr4	83550692	83720010	-	ENSG00000145284.7	SCD5	0.923505	Brain	3.07465	113.706	13.815	5.40254	1.11442	23.2459	5.5353
chr4	84011201	84058228	-	ENSG00000145287.6	PLAC8	0.864161	Intestine	13.7392	0.275383	38.5288	19.8903	13.1989	1.71058	107.165
chr4	86936276	87515284	-	ENSG00000109339.14	MAPK10	0.868446	Brain	7.5931	75.3028	10.4829	11.3879	1.91447	21.3922	6.66791
chr4	88224941	88244058	-	ENSG00000170509.7	HSD17B13	0.99741	Liver	0.137685	0.201752	1.39522	0.167739	147.128	0.113934	0.269991
chr4	88896819	88904562	+	ENSG00000118785.9	SPP1	0.957504	Brain	3.5111	101.197	2.20029	3.89573	6.41553	4.2827	5.49727
chr4	89617066	89619386	-	ENSG00000177432.6	NAP1L5	0.866097	Brain	1.65477	18.78	2.00006	4.23198	0.928172	4.24064	2.03249
chr4	90645250	90759466	-	ENSG00000145335.11	SNCA	0.922736	Brain	4.37309	48.1494	5.66205	4.23039	0.524486	3.2836	4.24782
chr4	100044808	100078949	-	ENSG00000198099.4	ADH4	0.999528	Liver	0.241722	0	0.100424	1.8903	881.839	0.136372	0.12985
chr4	100123795	100140694	-	ENSG00000172955.13	ADH6	0.996704	Liver	0.009017	0.003548	0.115056	0.134798	142.655	0.034946	2.52348
chr4	100197524	100212185	-	ENSG00000187758.3	ADH1A	0.998029	Liver	0.106862	0	2.49998	1.52716	429.44	0.236556	0.707322
chr4	100226121	100242558	-	ENSG00000196616.8	ADH1B	0.956883	Liver	30.431	0.139039	155.597	51.122	1145.17	12.0477	46.9197
chr4	100333418	100356894	-	ENSG00000196344.7	ADH7	0.998154	Esophagus	118.426	0	0.069619	1.1659	0.076233	0	0
chr4	100484918	100545156	+	ENSG00000138823.8	MTTP	0.987781	Liver	0.0754415	0.488785	0.165636	3.32437	68.1612	0.169345	0.77356
chr4	100737990	100791311	+	ENSG00000070190.8	DAPP1	0.867412	Esophagus	22.6683	0.398981	5.94589	3.91562	1.68132	1.45581	4.63563
chr4	103172198	103352415	-	ENSG00000138821.8	SLC39A8	0.924356	Lung	3.19521	3.57037	130.362	3.1413	12.3872	6.6955	30.1767
chr4	109663196	109684210	-	ENSG00000164089.4	ETNPPL	0.879678	Brain	0	38.5751	0	0.188246	27.3498	0.310511	0
chr4	110661852	110723335	-	ENSG00000205403.8	CFI	0.951521	Liver	7.20819	1.5577	19.6312	10.0659	179.079	10.3621	3.26386
chr4	113739265	114304896	+	ENSG00000145362.12	ANK2	0.881633	Brain	13.7708	121.423	7.78364	27.1429	1.20184	17.115	19.221
chr4	115519611	115599380	+	ENSG00000174607.6	UGT8	0.904194	Brain	1.16251	34.2106	0.609532	2.97775	0.043767	2.77693	12.0949
chr4	121956768	121994176	-	ENSG00000173376.9	NDNF	0.968964	Lung	4.71703	1.07477	89.1477	3.81182	0.217117	1.2857	5.49448
chr4	134070470	134129356	+	ENSG00000138650.7	PCDH10	0.973596	Brain	0.129968	17.7546	0.930212	0.998637	0.0050145	0.432733	0.316161
chr4	139085251	139163503	-	ENSG00000151012.9	SLC7A11	0.944145	Brain	0.960071	13.49	0.422975	1.02872	0.0683135	1.14643	0.894409
chr4	148402069	148466106	+	ENSG00000151617.11	EDNRA	0.858518	Lung	2.75775	1.23377	21.534	5.36053	0.947211	5.46897	2.51183
chr4	150999426	151178609	+	ENSG00000170390.10	DCLK2	0.888365	Brain	1.31071	26.7021	3.09687	5.86573	0.614168	2.6194	4.37848
chr4	151503077	151505843	+	ENSG00000181541.4	MAB21L2	0.986665	Intestine	0.35089	0.038685	0.108699	0.722106	0.308665	1.74829	40.9616
chr4	153539784	153601317	-	ENSG00000170006.7	TMEM154	0.927687	Esophagus	19.1342	0.373594	2.76166	1.74648	1.07848	0.500221	1.84151
chr4	155484108	155492238	+	ENSG00000171564.7	FGB	0.999851	Liver	0	0	0.273574	1.78082	2725.12	0.2807	0.103235
chr4	155504278	155511918	-	ENSG00000171560.10	FGA	0.999814	Liver	0	0	1.48324	2.31186	3837.32	0.40164	0.0961155
chr4	155525286	155534119	-	ENSG00000171557.12	FGG	0.999686	Liver	0	0	2.98381	2.52538	3232.76	0.509235	0.065059
chr4	156775890	156841558	+	ENSG00000151790.4	TDO2	0.996857	Liver	0.237453	0.158576	0.247269	0.164413	61.6093	0.0391545	0.315009
chr4	157997209	158093242	+	ENSG00000109738.6	GLRB	0.937442	Brain	0.381217	16.3761	1.61788	2.07037	0.312127	0.395614	1.36957
chr4	158125334	158287227	+	ENSG00000120251.14	GRIA2	0.998971	Brain	0.248477	104.965	0.029709	0.206959	4.95e-05	0.007282	0.1555
chr4	159122756	159176563	+	ENSG00000164124.6	TMEM144	0.933129	Brain	4.72146	77.86	3.9982	4.63211	0.916684	8.56994	8.40093
chr4	167654535	168155947	-	ENSG00000196104.6	SPOCK3	0.997487	Brain	0.014273	35.4013	0.078725	0.098007	0.062519	0.0214385	0.258896
chr4	169013666	169108841	+	ENSG00000109511.6	ANXA10	0.933716	Stomach	0	0	0.023465	34.995	13.8569	0.0149945	0.0223605
chr4	174446120	174451380	-	ENSG00000164107.7	HAND2	0.92645	Stomach	0.397866	0	0.040828	40.9956	3.57768	0.653022	13.422
chr4	176554085	176923815	-	ENSG00000150625.12	GPM6A	0.966343	Brain	0.810727	242.233	19.0254	1.87544	4.98522	7.22037	14.9993
chr4	176986985	177103978	+	ENSG00000150627.11	WDR17	0.893889	Brain	0.833047	15.254	2.24709	1.57404	0.199965	3.11551	1.74211
chr4	177604689	177713881	-	ENSG00000150630.2	VEGFC	0.882987	Thyroid	2.72674	0.487628	5.83198	2.54394	1.65422	21.0916	1.56342
chr4	185676749	185747972	-	ENSG00000151726.9	ACSL1	0.927526	Liver	15.1011	12.3793	36.3869	16.4978	256.704	20.676	10.5845
chr4	186422851	186456766	-	ENSG00000154553.9	PDLIM3	0.850333	Stomach	31.3501	4.51836	29.7412	146.113	3.42997	12.5458	49.6244
chr4	187130133	187179625	+	ENSG00000164344.11	KLKB1	0.989928	Liver	0.298465	0.945309	0.58978	0.564344	67.8606	0.886632	0.816474
chr4	187187099	187210835	+	ENSG00000088926.9	F11	0.993202	Liver	0.0029595	0.073493	2.12504	0.109423	61.2339	0.0423215	0.144416
chr5	473425	524447	-	ENSG00000066230.6	SLC9A3	0.903843	Stomach	0.400811	0.76988	0.325161	13.329	0.25727	0.644388	5.29255
chr5	660883	693510	-	ENSG00000171368.10	TPPP	0.91846	Brain	2.89103	82.5038	12.092	9.64209	1.32307	9.08611	5.33009
chr5	1008944	1039058	+	ENSG00000145506.9	NKD2	0.9114	Lung	4.34739	1.87367	17.7957	0.742511	0.9306	0.366452	1.19958
chr5	1456595	1524092	-	ENSG00000153395.5	LPCAT1	0.912136	Lung	5.39265	11.4083	105.186	11.2344	5.45172	9.81577	12.15
chr5	1801514	1816719	+	ENSG00000145494.7	NDUFS6	0.853785	Esophagus	17.9646	2.96863	2.21295	3.29053	2.66751	2.47874	2.14174
chr5	2745959	2752969	-	ENSG00000170561.8	IRX2	0.961227	Lung	1.82733	0.019076	17.9485	1.30473	0.0072795	0.857935	0.159163
chr5	2752245	2755508	+	ENSG00000186493.7	C5orf38	0.910959	Lung	1.24504	0.079394	10.7016	0.492602	0	3.83223	0.0679855
chr5	6448736	6495022	+	ENSG00000215218.3	UBE2QL1	0.965753	Brain	0.160919	10.4223	0.09228	0.310472	0.273612	0.502337	0.801964
chr5	7396321	7830194	+	ENSG00000078295.11	ADCY2	0.959087	Brain	0.718453	22.8072	0.310941	2.42324	0.00725	0.172762	1.96609
chr5	10275987	10308138	-	ENSG00000164237.4	CMBL	0.852111	Liver	3.46923	8.01299	8.39074	10.5933	79.1587	8.6793	31.0947
chr5	10971952	11904155	-	ENSG00000169862.14	CTNND2	0.991048	Brain	0.171425	69.7075	1.39536	0.998441	0.477589	0.074879	0.626453
chr5	17065707	17276943	+	ENSG00000176788.7	BASP1	0.895209	Brain	8.65173	47.7149	4.11004	6.23677	3.50213	4.22834	3.27147
chr5	19473060	20575982	-	ENSG00000145526.7	CDH18	0.997227	Brain	0.0113475	11.5792	0.007478	0.124707	0	0	0.049128
chr5	24487209	24645087	-	ENSG00000040731.6	CDH10	0.988137	Brain	0.02399	10.195	0.310134	0.275443	0	0	0.116089
chr5	34998206	35048198	-	ENSG00000113492.9	AGXT2	0.999743	Liver	0	0	0.007125	0.009203	19.9308	0	0.014434
chr5	35852797	35879705	+	ENSG00000168685.10	IL7R	0.899446	Lung	13.77	0.310291	73.4798	5.48667	6.37617	6.79585	11.5931
chr5	35951112	36001130	-	ENSG00000145626.7	UGT3A1	0.999577	Liver	0	0	0.004214	0.015138	10.6423	0.0076745	0
chr5	36192694	36242381	-	ENSG00000152620.8	NADK2	0.873073	Liver	9.91415	19.875	11.0927	14.6118	113.974	16.6496	14.655
chr5	36248536	36302216	-	ENSG00000164188.4	RANBP3L	0.907222	Brain	0.245859	14.873	2.03712	0.74247	2.87408	2.20174	0.178059
chr5	36606457	36688436	+	ENSG00000079215.9	SLC1A3	0.981401	Brain	9.09644	189.039	5.7794	1.71281	1.4644	1.79569	1.24741
chr5	39284364	39424970	-	ENSG00000113600.6	C9	0.999624	Liver	0.023	0.024375	0.175846	0.18418	268.276	0.108299	0.089009
chr5	41142336	41261540	-	ENSG00000039537.9	C6	0.996332	Liver	0.335445	0.012654	1.39426	0.927567	199.359	1.32826	0.388827
chr5	42423879	42721979	+	ENSG00000112964.9	GHR	0.935661	Liver	3.52309	1.46169	5.56894	6.40169	67.8984	4.61134	4.64432
chr5	42799982	42887494	-	ENSG00000250722.1	SEPP1	0.853033	Liver	76.8654	57.8614	336.844	179.133	1391.77	127.058	449.499
chr5	43376747	43412493	-	ENSG00000151882.7	CCL28	0.854315	Intestine	3.17886	0.549113	2.94437	8.78253	1.25233	18.972	40.8177
chr5	52776239	52782964	+	ENSG00000134363.7	FST	0.926341	Liver	2.43744	0.151614	1.88018	1.13155	16.4416	0.846911	0.818734
chr5	57878048	58155213	+	ENSG00000152932.6	RAB3C	0.972044	Brain	0.841652	21.4368	0.20165	1.17669	0.15961	0.19604	1.02014
chr5	63802084	63908139	+	ENSG00000186479.4	RGS7BP	0.945282	Brain	0.85604	18.514	1.80697	1.29828	1.08857	0.489169	0.539254
chr5	71403061	71505395	+	ENSG00000131711.10	MAP1B	0.897911	Brain	16.679	160.464	6.84082	50.864	1.27951	7.0172	15.6089
chr5	73923234	73937249	-	ENSG00000171617.9	ENC1	0.928793	Brain	2.78021	102.666	11.5876	6.22399	7.89019	2.74225	12.6389
chr5	74073399	74162776	-	ENSG00000198780.7	FAM169A	0.870274	Brain	1.2289	17.8831	0.612142	1.04317	2.35767	7.68694	0.990667
chr5	76114758	76131140	+	ENSG00000164251.4	F2RL1	0.89042	Intestine	4.10553	0.448057	2.40028	8.5169	2.7779	3.99143	33.8262
chr5	76248538	76276983	+	ENSG00000145708.6	CRHBP	0.970293	Liver	0.353587	2.95944	0.597917	0.380365	32.8771	1.09966	0.469053
chr5	76506274	76725632	+	ENSG00000113231.9	PDE8B	0.920333	Thyroid	0.969721	11.2496	3.9819	3.15564	0.551226	44.8481	1.52936
chr5	78293438	78531861	-	ENSG00000132837.10	DMGDH	0.973213	Liver	1.19357	2.34372	0.700638	1.70458	63.0459	2.85115	1.33931
chr5	78365540	78385289	+	ENSG00000132840.5	BHMT2	0.969321	Liver	3.84668	0.841808	1.04872	7.73009	124.897	6.29523	3.22748
chr5	78407602	78428108	+	ENSG00000145692.10	BHMT	0.999311	Liver	0.055125	0.198519	0.079115	0.399548	236.558	0.118548	0.126886
chr5	80256491	80525975	+	ENSG00000113319.7	RASGRF2	0.852125	Brain	2.26275	17.7337	2.50736	2.88639	0.491165	5.52603	2.06058
chr5	80625824	80689998	-	ENSG00000172497.4	ACOT12	0.998501	Liver	0.0143885	0.0741425	0.039543	0.046084	23.9504	0.0227975	0.018406
chr5	89825161	90460038	+	ENSG00000164199.11	GPR98	0.882899	Brain	0.191133	23.4339	7.01389	0.146409	0.473689	8.13672	0.502881
chr5	110559351	110830584	+	ENSG00000152495.6	CAMK4	0.887209	Brain	1.4106	10.5322	1.45477	1.4057	0.959145	0.397215	1.50023
chr5	115140430	115152651	-	ENSG00000129596.4	CDO1	0.94263	Liver	0.995789	10.3277	8.04248	2.14578	77.6237	4.24441	0.963336
chr5	126626523	126801429	+	ENSG00000145794.12	MEGF10	0.982379	Brain	0.12571	13.447	0.047561	0.352828	0.141997	0.139048	0.614525
chr5	131142683	131347936	-	ENSG00000164398.8	ACSL6	0.972535	Brain	1.18059	42.2523	0.75175	1.33391	1.9413	0.980871	0.774267
chr5	132028320	132073330	-	ENSG00000131437.11	KIF3A	0.894906	Brain	3.0129	24.4309	3.48042	2.60287	0.578021	3.47368	2.25738
chr5	132149033	132152488	+	ENSG00000198944.4	SOWAHA	0.861756	Brain	0.0587305	13.3346	0.057324	1.7649	0.95745	1.40799	6.81423
chr5	132208014	132210738	+	ENSG00000164406.7	LEAP2	0.98106	Liver	0.577788	0.893857	0.779096	0.726303	47.8189	1.26256	1.1946
chr5	134363425	134370503	-	ENSG00000069011.11	PITX1	0.968445	Esophagus	148.352	0.013498	0.141617	18.8258	0.014336	0.0344195	9.05736
chr5	135257968	135290723	-	ENSG00000145826.4	LECT2	0.999936	Liver	0	0	0	0.023426	61.246	0	0
chr5	136310987	136934068	-	ENSG00000152377.8	SPOCK1	0.947411	Brain	2.22144	50.0568	0.603881	5.50054	0.051428	3.03621	4.38108
chr5	137774706	137782658	+	ENSG00000132563.11	REEP2	0.928455	Brain	1.10311	32.1882	0.336194	7.5544	0.067806	0.61332	4.14256
chr5	138204612	138211057	-	ENSG00000146006.7	LRRTM2	0.981376	Brain	0.110488	12.9455	0.47948	0.275101	0.135	0.152227	0.294277
chr5	139175406	139224051	+	ENSG00000146005.3	PSD2	0.997514	Brain	0.0504755	21.2768	0.035427	0.057794	0.0281835	0.0670715	0.0784455
chr5	140868808	140892546	+	ENSG00000240764.2	PCDHGC5	0.96328	Brain	0.428284	10.119	0.655091	0.36272	0.102994	0.295907	0.38444
chr5	141323150	141349304	-	ENSG00000113555.4	PCDH12	0.880014	Lung	0.72212	0.659365	12.6312	1.42488	1.74258	3.44513	1.09936
chr5	141971743	142077617	-	ENSG00000113578.13	FGF1	0.972165	Brain	1.61917	60.4514	2.35301	1.59734	0.350891	2.53732	1.63814
chr5	143550396	143865249	+	ENSG00000183775.6	KCTD16	0.943647	Brain	0.079356	10.2662	1.34494	0.09141	0.010266	1.85145	0.093773
chr5	145967936	146464347	-	ENSG00000156475.14	PPP2R2B	0.965261	Brain	1.72009	52.7316	1.18715	2.32765	0.431939	3.40659	1.9177
chr5	147204131	147211349	-	ENSG00000164266.6	SPINK1	0.961767	Stomach	0	0	0.140558	58.9079	0.555953	0.013862	12.8029
chr5	147250245	147261754	+	ENSG00000164265.4	SCGB3A2	0.999735	Lung	0.106035	0	112.159	0	0	0.0724655	0
chr5	147405246	147516852	+	ENSG00000133710.11	SPINK5	0.999568	Esophagus	849.83	0.0078165	0.609106	0.148369	0.011597	0.292476	1.13106
chr5	147691982	147695485	+	ENSG00000145879.6	SPINK7	0.999941	Esophagus	302.569	0	0	0.106552	0	0	0
chr5	148303202	148442726	-	ENSG00000169247.7	SH3TC2	0.942348	Brain	1.6458	12.5001	0.6167	0.285006	0.209471	0.502018	1.06492
chr5	149340300	149373018	+	ENSG00000155850.7	SLC26A2	0.970713	Intestine	11.8131	2.14074	13.7508	5.07082	1.08404	4.93002	220.743
chr5	149546358	149564120	+	ENSG00000113722.12	CDX1	0.998891	Intestine	0.045143	0.0200035	0.042694	0.15032	0.0132605	0.014388	42.9375
chr5	149599054	149669854	-	ENSG00000070808.11	CAMK2A	0.996995	Brain	0.13094	187.659	0.93799	1.61937	0.0513745	0.018606	0.624804
chr5	150400124	150408554	+	ENSG00000211445.7	GPX3	0.899662	Thyroid	39.0482	7.67102	323.107	54.1855	118.675	965.155	38.3639
chr5	150883654	150948505	-	ENSG00000086570.8	FAT2	0.997393	Esophagus	21.2627	0.047766	0.064839	0.020831	0.009129	0.15935	0.0306605
chr5	152869175	153193429	+	ENSG00000155511.13	GRIA1	0.914051	Brain	0.193567	24.3964	11.3161	0.465781	0.0273765	0.177802	0.400549
chr5	159990127	160279221	-	ENSG00000118322.8	ATP10B	0.947321	Intestine	5.76451	8.21654	0.029068	5.27803	0.0367255	0.037366	61.2583
chr5	160715436	160976050	-	ENSG00000145864.8	GABRB2	0.987726	Brain	0.0606175	37.907	1.66333	0.252004	0.0061525	0.135867	0.67357
chr5	161274197	161326975	+	ENSG00000022355.10	GABRA1	0.999943	Brain	0	44.4078	0	0.004567	0	0	0.010665
chr5	161494546	161582542	+	ENSG00000113327.10	GABRG2	0.997959	Brain	0	30.6371	0	0.111002	0	0	0.264271
chr5	169801675	169816681	-	ENSG00000145936.4	KCNMB1	0.858735	Stomach	3.32734	0.27872	1.10125	15.2994	0.175033	0.438281	7.64707
chr5	170190354	170241051	+	ENSG00000094755.12	GABRP	0.957901	Esophagus	11.4901	0.00754	0.464685	0.863604	1.31508	0.074094	0.177337
chr5	173472607	173670504	+	ENSG00000170091.6	NSG2	0.988124	Brain	0	50.4679	0.024731	1.07117	0.0244495	0.102255	2.37366
chr5	175223313	175311023	+	ENSG00000145920.10	CPLX2	0.997046	Brain	0	109.822	0.038192	0.48634	0.0032915	0.0164095	1.40201
chr5	175487692	175559261	+	ENSG00000182230.7	FAM153B	0.9481	Brain	0.59455	11.1191	0.841407	0.31534	0.329958	1.31642	0.0648195
chr5	175969512	176022975	+	ENSG00000074276.6	CDHR2	0.883746	Liver	0.126664	0.430465	0.200955	5.56708	29.4704	0.288222	13.9429
chr5	176022803	176037134	-	ENSG00000169258.6	GPRIN1	0.970008	Brain	0.208257	10.2431	0.434858	0.341968	0.119878	0.132677	0.605629
chr5	176047085	176057530	-	ENSG00000074317.6	SNCB	0.999782	Brain	0	69.1769	0	0.055425	0	0	0.034882
chr5	176237478	176307897	+	ENSG00000113763.6	UNC5A	0.993846	Brain	0.027357	14.3327	0.159903	0.073607	0.037166	0.188012	0.043195
chr5	176829141	176836577	-	ENSG00000131187.5	F12	0.99471	Liver	1.81809	0.638769	0.333995	0.444039	128.153	0.175254	0.657268
chr5	177664619	178017556	-	ENSG00000050767.11	COL23A1	0.972825	Thyroid	0.484098	0.951404	0.640195	1.63063	0.240188	26.4344	0.363562
chr5	180017103	180018540	-	ENSG00000161055.3	SCGB3A1	0.973536	Lung	11.1926	0.097461	85.4513	0.239029	0.733243	1.25346	0.0525975
chr5	180326077	180377906	+	ENSG00000113303.7	BTNL8	0.905392	Intestine	0.0343585	0.032795	1.59108	6.68797	0.273962	0.285434	15.6886
chr5	180415845	180433727	+	ENSG00000168903.8	BTNL3	0.997049	Intestine	0	0	0.020153	0.176041	0	0.0109	11.6946
chr5	180467225	180488523	+	ENSG00000165810.12	BTNL9	0.910423	Lung	1.29968	4.00744	40.2955	2.9704	1.94737	8.92171	2.51063
chr6	2832566	2842240	-	ENSG00000021355.8	SERPINB1	0.897734	Esophagus	241.64	3.70232	44.1751	28.8695	10.5991	20.7296	40.193
chr6	3153903	3157760	-	ENSG00000137267.5	TUBB2A	0.899286	Brain	19.0177	119.732	4.43898	21.0095	12.0478	2.80078	13.0377
chr6	3224495	3231964	-	ENSG00000137285.9	TUBB2B	0.949259	Brain	5.13881	77.7895	1.26534	6.95927	3.8862	0.960067	5.47324
chr6	5998232	6007200	-	ENSG00000124785.4	NRN1	0.860305	Brain	4.80499	32.9315	10.6708	5.0352	1.29801	2.89997	2.89323
chr6	7541808	7586950	+	ENSG00000096696.9	DSP	0.948326	Esophagus	417.083	0.591715	4.89138	19.7797	23.7801	43.0627	37.208
chr6	10393419	10419892	-	ENSG00000137203.6	TFAP2A	0.979092	Esophagus	16.6796	0.197622	0.267207	0.747135	0.0514715	0.366545	0.462408
chr6	11712287	11807279	-	ENSG00000111863.8	ADTRP	0.859985	Intestine	0.890513	0.766007	4.66758	14.458	0.452937	0.430358	25.7894
chr6	12290596	12297427	+	ENSG00000078401.6	EDN1	0.883827	Lung	4.28286	1.95108	23.5471	3.47744	0.944113	1.04427	4.71346
chr6	12717893	13288645	+	ENSG00000112137.12	PHACTR1	0.873552	Brain	4.1148	50.4616	20.2977	6.84311	1.6642	2.56152	2.80332
chr6	19837617	19840915	+	ENSG00000172201.6	ID4	0.924715	Thyroid	23.3739	30.9232	29.1607	12.962	4.48147	236.118	5.7563
chr6	24126350	24155128	+	ENSG00000152954.7	NRSN1	0.992967	Brain	0	23.1346	0	0.347156	0.0062145	0.140218	0.482604
chr6	24424793	24495433	-	ENSG00000112293.10	GPLD1	0.923569	Liver	1.04139	3.75674	1.69253	1.62419	27.5857	2.37405	2.16157
chr6	25754927	25781419	+	ENSG00000146039.6	SLC17A4	0.8771	Liver	0	0	0.004019	0.068643	11.9052	0.0061685	8.70008
chr6	25783125	25832287	-	ENSG00000124568.6	SLC17A1	0.999488	Liver	0	0	0.030067	0	11.3841	0.0048785	0
chr6	25833294	25882514	-	ENSG00000124564.13	SLC17A3	0.998229	Liver	0.0117315	0	0.05043	0.023202	11.0661	0.0068665	0.025381
chr6	25912982	25930946	-	ENSG00000112337.6	SLC17A2	0.999913	Liver	0	0	0	0.011615	22.1378	0	0
chr6	26017260	26018040	-	ENSG00000124610.3	HIST1H1A	0.919685	Esophagus	12.2195	0.807963	0.441183	0.988416	1.16023	2.13746	0.353164
chr6	26031817	26032288	-	ENSG00000124693.2	HIST1H3B	0.889911	Esophagus	132.976	1.84738	7.31165	14.9439	4.75093	5.44372	53.538
chr6	26043455	26043885	-	ENSG00000196226.2	HIST1H2BB	0.948632	Esophagus	32.6324	1.27261	1.01803	2.71122	0.855449	1.02693	3.1734
chr6	26045639	26046097	+	ENSG00000196532.4	HIST1H3C	0.917471	Esophagus	70.0302	1.35281	3.29483	8.90207	2.5815	3.27023	15.2757
chr6	26199079	26199471	-	ENSG00000196866.2	HIST1H2AD	0.992841	Esophagus	67.0777	0.643606	0.243515	1.04226	0.183292	0.345712	0.422816
chr6	26225383	26225844	+	ENSG00000196966.3	HIST1H3E	0.898577	Esophagus	42.795	1.0871	2.84362	6.87045	1.47438	7.28732	6.47961
chr6	26250370	26250835	-	ENSG00000256316.1	HIST1H3F	0.852995	Esophagus	69.6625	0.552592	8.36735	10.934	2.62249	5.79288	33.1751
chr6	26251879	26252303	+	ENSG00000197459.2	HIST1H2BH	0.884589	Esophagus	59.9428	0.491781	4.63237	11.0499	1.81812	5.92923	17.5871
chr6	26273144	26273622	+	ENSG00000168242.3	HIST1H2BI	0.866864	Esophagus	44.6165	0.511524	5.04848	8.18325	1.68322	5.12094	15.0929
chr6	27106073	27114619	-	ENSG00000197903.6	HIST1H2BK	0.8725	Esophagus	159.543	6.7519	21.5266	26.6713	18.9817	22.0621	26.0562
chr6	27114861	27115317	+	ENSG00000184825.4	HIST1H2AH	0.915956	Esophagus	50.9944	0.707505	2.07599	6.68814	1.05286	2.25231	12.9379
chr6	27775257	27775709	-	ENSG00000185130.4	HIST1H2BL	0.869194	Esophagus	31.184	2.25074	2.61192	4.18924	0.941917	1.94396	12.5366
chr6	27775899	27776429	+	ENSG00000196747.3	HIST1H2AI	0.946011	Esophagus	79.9153	0.474999	2.45987	6.64921	1.03499	2.68201	12.5863
chr6	27782112	27782607	-	ENSG00000182611.3	HIST1H2AJ	0.874462	Esophagus	60.789	0.240277	3.66734	7.75338	1.83679	3.44362	28.8466
chr6	27782822	27783267	+	ENSG00000196374.5	HIST1H2BM	0.966351	Esophagus	35.5011	0.951987	0.715261	1.7938	0.459504	1.02344	2.22351
chr6	27798952	27799305	-	ENSG00000197914.2	HIST1H4K	0.852884	Esophagus	212.329	30.1983	23.6698	50.8424	18.4724	38.432	25.8073
chr6	27833034	27833606	+	ENSG00000198374.3	HIST1H2AL	0.981152	Esophagus	42.0567	0.155177	0.605123	1.33648	0.356957	0.483362	1.81907
chr6	27834570	27835359	-	ENSG00000184357.3	HIST1H1B	0.919604	Esophagus	136.451	0.769075	4.5062	13.8571	2.80163	4.18106	39.7057
chr6	27839623	27840099	-	ENSG00000182572.2	HIST1H3I	0.934493	Esophagus	62.0692	0.655611	3.10961	7.60838	1.98108	4.34811	6.69316
chr6	27840926	27841289	-	ENSG00000198558.2	HIST1H4L	0.971091	Esophagus	42.0991	0.25585	1.27247	1.18249	0.506489	1.12051	2.96436
chr6	27858093	27860884	-	ENSG00000197153.3	HIST1H3J	0.981504	Esophagus	37.3301	0.111171	0.434868	1.16885	0.307392	0.814026	1.3065
chr6	30951495	30957680	+	ENSG00000204544.5	MUC21	0.999851	Esophagus	23.7796	0	0.021206	0	0	0	0
chr6	31865562	31913449	+	ENSG00000166278.10	C2	0.929231	Liver	0	0.220915	4.10953	1.04876	16.2882	0.390472	1.14652
chr6	31895475	31919861	+	ENSG00000243649.4	CFB	0.991764	Liver	0.206574	0.0423675	0.462185	1.11576	58.9099	0.31612	0.768147
chr6	31949801	31970458	+	ENSG00000244731.3	C4A	0.953177	Liver	0.0405245	2.27275	4.88884	3.83161	133.408	19.4044	7.0412
chr6	31982539	32003195	+	ENSG00000224389.4	C4B	0.947005	Liver	0.0269315	0.898251	2.08376	1.88347	50.3665	8.38033	2.74222
chr6	32148745	32152101	-	ENSG00000204305.9	AGER	0.99592	Lung	0	0.094071	50.2177	0.142873	0.0847695	0.790523	0.117013
chr6	32485120	32498064	-	ENSG00000198502.5	HLA-DRB5	0.96927	Stomach	0	0	9.57278	61.1277	0.095781	1.56808	0.034148
chr6	32546546	32557625	-	ENSG00000196126.6	HLA-DRB1	0.916448	Stomach	0.333774	0.317623	35.4389	91.5824	1.47597	5.82081	2.524
chr6	32595956	32614839	+	ENSG00000196735.7	HLA-DQA1	0.856092	Lung	7.34526	0.483194	56.1428	12.9478	7.99184	4.54701	15.1612
chr6	33239787	33244287	+	ENSG00000231500.2	RPS18	0.973525	Esophagus	290.325	1.60345	1.25583	4.05368	3.46646	14.8017	20.937
chr6	34256547	34393825	-	ENSG00000270800.1	RPS10-NUDT3	0.910962	Brain	1.18671	32.4394	2.53035	5.6908	1.54198	0	6.3801
chr6	34433916	34503006	+	ENSG00000124507.6	PACSIN1	0.997092	Brain	0.129973	60.1952	0.119262	0.24603	0.165213	0.113822	0.276143
chr6	35182190	35220856	+	ENSG00000146197.7	SCUBE3	0.956839	Thyroid	0.373984	0.245293	0.680919	1.08423	0.0551625	15.2818	1.51791
chr6	36708552	36807778	-	ENSG00000124772.7	CPNE5	0.902445	Brain	1.19045	14.8024	0.703436	2.08052	0.305152	0.815323	3.56939
chr6	41235664	41254457	-	ENSG00000124731.8	TREM1	0.960526	Lung	0.577766	0.173079	25.4747	3.15545	0.854702	0.584283	0.688214
chr6	41704449	41721847	-	ENSG00000096088.12	PGC	0.940814	Stomach	0	0.0214275	64.8232	185.324	0.691059	0.204991	0.0714065
chr6	42068856	42110357	-	ENSG00000188112.4	C6orf132	0.938041	Esophagus	70.0004	0.0115495	3.92062	8.23818	0.247721	7.39498	6.2099
chr6	42928496	42931618	+	ENSG00000124713.5	GNMT	0.992895	Liver	0.330948	1.03123	0.650822	0.425497	79.6133	0.694741	0.260464
chr6	43211418	43255997	+	ENSG00000146216.7	TTBK1	0.987402	Brain	0.023808	11.8298	0.037173	0.140955	0.476182	0.068454	0.147588
chr6	43263432	43273276	+	ENSG00000137204.10	SLC22A7	0.999564	Liver	0	0.144262	0.038766	0.082941	120.846	0.0481375	0.0023845
chr6	44238203	44275243	+	ENSG00000178233.13	TMEM151B	0.994462	Brain	0.010572	22.6516	0.013254	0.121394	0	0.173544	0.433892
chr6	45868045	46048132	-	ENSG00000112782.11	CLIC5	0.928517	Lung	1.31309	1.74769	128.836	3.40173	0.491569	12.0622	36.2413
chr6	46517541	46620523	-	ENSG00000146233.3	CYP39A1	0.89351	Liver	3.31075	0.563215	2.73811	2.79908	24.2053	3.27326	2.7813
chr6	46761127	46807515	+	ENSG00000112818.5	MEP1A	0.998833	Intestine	0.0088895	0.0889245	0.054067	0.117366	0.0497165	0.0207825	48.5314
chr6	46820249	46922680	-	ENSG00000069122.14	GPR116	0.914568	Lung	6.09289	7.02029	108.269	7.73087	6.12248	24.0618	4.46936
chr6	49695097	49712150	-	ENSG00000096006.7	CRISP3	0.999852	Esophagus	220.106	0	0.092817	0.045138	0.0569705	0	0
chr6	52614897	52628367	-	ENSG00000244067.1	GSTA2	0.995011	Liver	0	0	0.261271	1.72245	68.464	0.0191425	0.0464165
chr6	52656462	52668708	-	ENSG00000243955.1	GSTA1	0.982779	Liver	3.00196	0	1.84145	36.8054	417.603	0.0984175	1.40183
chr6	54711569	54806820	+	ENSG00000168143.8	FAM83B	0.857998	Esophagus	21.8818	0	0.104124	2.74453	0.205881	4.83164	10.7574
chr6	55618443	55740362	-	ENSG00000112175.6	BMP5	0.90667	Lung	0.397137	0.047445	11.8568	1.10047	1.37252	0.972612	2.74937
chr6	69345259	70099403	+	ENSG00000135298.9	BAI3	0.941762	Brain	0.809794	28.4604	2.85705	2.55567	0.609208	0.718222	2.39489
chr6	72596406	73112845	+	ENSG00000079841.14	RIMS1	0.979604	Brain	0.24476	27.3219	1.34993	1.42643	0.015552	0.0526275	0.254211
chr6	73331520	73908574	+	ENSG00000185760.11	KCNQ5	0.897929	Brain	0.579932	14.9483	0.558951	0.563083	0.0992145	6.7485	0.605016
chr6	84262599	84419410	-	ENSG00000065609.10	SNAP91	0.993191	Brain	0.062369	44.8724	0.027844	0.855168	0	0.25097	0.636826
chr6	88849583	88876078	-	ENSG00000118432.11	CNR1	0.876817	Brain	0.786003	15.7316	2.22137	2.25755	0.0436455	0.947457	5.37121
chr6	93949738	94129265	-	ENSG00000135333.9	EPHA7	0.907705	Stomach	0.381551	3.26211	0.200357	26.2964	0.0243355	0.071871	10.622
chr6	96463860	96663488	+	ENSG00000172461.6	FUT9	0.994089	Brain	0	22.9521	0.002542	0.692846	0.0016815	0.0020115	0.114909
chr6	97372605	97588630	+	ENSG00000186231.12	KLHL32	0.972506	Brain	0.0691875	10.8094	0.384213	0.120294	0.144563	0.64125	0.423679
chr6	101846664	102517958	+	ENSG00000164418.15	GRIK2	0.954902	Brain	0.511077	20.2668	0.238203	1.53881	0.0646395	1.93843	1.19281
chr6	106959730	107018326	+	ENSG00000112297.10	AIM1	0.883261	Esophagus	63.7582	0.262172	9.99689	6.30407	5.70323	5.51033	16.8818
chr6	110421022	110501207	-	ENSG00000112290.8	WASF1	0.926941	Brain	3.9346	35.0497	1.36194	5.69953	1.29996	0.971155	2.09695
chr6	117073363	117086886	-	ENSG00000183807.6	FAM162B	0.892118	Lung	2.05566	2.16798	16.0906	1.51152	0.326636	3.2602	1.09333
chr6	117609463	117747018	-	ENSG00000047936.6	ROS1	0.994931	Lung	0.0022145	0.442644	24.6569	0.021133	0.055471	0.0096605	0.218828
chr6	118228689	118638839	+	ENSG00000196376.6	SLC35F1	0.956871	Brain	0.348063	16.2131	0.159176	1.43863	0.0295075	0.494896	1.72525
chr6	118869461	118881893	+	ENSG00000198523.5	PLN	0.869804	Stomach	17.5689	0.415229	6.73116	91.0734	0.234766	4.01201	42.1824
chr6	122793076	123047518	+	ENSG00000135549.10	PKIB	0.87895	Intestine	3.24307	1.22936	0.910746	3.67526	1.36529	0.975165	15.6945
chr6	123100620	123105219	+	ENSG00000164434.7	FABP7	0.999536	Brain	0.0334485	19.4593	0	0.020728	0	0	0
chr6	124125286	125146803	+	ENSG00000188580.9	NKAIN2	0.990833	Brain	0.127371	15.8049	0.057718	0.147296	0.122575	0.10596	0.30842
chr6	125440195	125585553	+	ENSG00000111907.16	TPD52L1	0.857165	Esophagus	44.0536	9.85506	3.37079	3.73231	8.33073	8.47333	3.9922
chr6	127759551	127840146	-	ENSG00000255330.4	SOGA3	0.883524	Brain	0.345043	11.1278	3.03318	3.08536	0	0.0556835	1.25747
chr6	131148546	131158275	+	ENSG00000256162.2	SMLR1	0.999308	Liver	0	0.004039	0.007644	0.028084	10.3747	0	0.003279
chr6	131894284	131905472	+	ENSG00000118520.9	ARG1	0.998816	Liver	0.988502	0.0685385	0.120193	0.169032	204.556	0.0828545	0.023664
chr6	133002729	133035188	-	ENSG00000112299.7	VNN1	0.981776	Liver	0.53494	0.086119	1.03097	1.73176	48.3877	0.438466	1.46852
chr6	133043926	133055904	-	ENSG00000093134.9	VNN3	0.925687	Liver	0.353016	0.040445	2.81668	1.01459	10.5079	0.21404	0.246484
chr6	134210276	134216691	+	ENSG00000118526.6	TCF21	0.865481	Lung	4.58253	0	18.6837	4.93048	0.748977	0.044882	4.77305
chr6	135238528	135271260	-	ENSG00000118514.9	ALDH8A1	0.991555	Liver	0.306696	1.61245	0.45558	0.349661	65.4698	0.218555	0.374478
chr6	135502453	135540311	+	ENSG00000118513.14	MYB	0.941422	Intestine	2.379	0.141283	1.61666	1.24854	0.070957	0.239343	16.2056
chr6	138409642	138428648	-	ENSG00000112378.11	PERP	0.952966	Esophagus	307.728	0.840962	16.284	12.0533	22.6249	10.617	24.4216
chr6	150204511	150219238	-	ENSG00000164520.7	RAET1E	0.993479	Esophagus	18.581	0.0961655	0.199249	0.105857	0.0103725	0.191448	0.123933
chr6	150339470	150346668	-	ENSG00000155918.3	RAET1L	0.999457	Esophagus	10.7513	0.018561	0.006456	0	0.001212	0.008788	0
chr6	150464212	150571493	+	ENSG00000198729.4	PPP1R14C	0.917106	Thyroid	3.96519	3.63031	3.48702	0.09067	0.0160295	29.4296	3.44799
chr6	150690028	150727105	+	ENSG00000009765.10	IYD	0.989196	Thyroid	0.011051	0	0.656089	0.788075	9.1878	232.052	4.39931
chr6	151977826	152450754	+	ENSG00000091831.17	ESR1	0.884296	Liver	0.873238	0.271624	2.43534	1.15996	11.994	2.78248	0.803858
chr6	153071933	153080900	+	ENSG00000146469.8	VIP	0.85486	Intestine	0.201024	2.68434	0.765445	12.5527	0.119308	0.387738	19.1891
chr6	154475631	154677926	-	ENSG00000074706.9	IPCEF1	0.87655	Thyroid	3.81059	15.7075	3.19187	1.80456	1.76823	38.335	2.11197
chr6	159590429	159693141	+	ENSG00000164694.12	FNDC1	0.953373	Thyroid	0.89178	0.0408795	1.2223	1.458	0.405394	27.5765	3.69648
chr6	160542821	160579750	+	ENSG00000175003.8	SLC22A1	0.997873	Liver	0.289615	0.235298	0.679072	0.352031	224.357	0.993653	0.312904
chr6	160952515	161087407	-	ENSG00000198670.7	LPA	0.998541	Liver	0.023496	0.148099	0.095866	0.02706	38.672	0.0256095	0.0183915
chr6	161123270	161174347	+	ENSG00000122194.14	PLG	0.999876	Liver	0	0.0038125	0.077886	0.470472	840.668	0.058918	0.014116
chr6	163835032	163999628	+	ENSG00000112531.12	QKI	0.863486	Brain	11.5186	213.21	66.3838	28.5089	21.5644	25.4657	21.1954
chr6	166719168	166721936	-	ENSG00000176381.4	PRR18	0.978996	Brain	0.011164	14.0554	0.196001	0.024007	1.36724	0.1355	0.0374265
chr6	168841831	169073984	+	ENSG00000112562.14	SMOC2	0.905811	Stomach	11.1969	0.965538	7.62793	106.113	1.37168	24.4465	14.36
chr7	588834	767287	-	ENSG00000188191.10	PRKAR1B	0.917496	Brain	4.24934	87.0764	10.7753	7.34527	6.19218	5.48855	9.0545
chr7	4945620	4998844	-	ENSG00000136297.10	MMD2	0.997987	Brain	0	11.7058	0	0.069283	0	0	0.0721235
chr7	14184674	15014402	-	ENSG00000136267.9	DGKB	0.962129	Brain	0.634667	20.4627	0.103727	1.2011	0.030931	0.102794	2.57648
chr7	15239943	15601640	-	ENSG00000187546.9	AGMO	0.987349	Liver	0.154994	0.777896	0.229122	0.347658	28.5968	0.368888	0.292127
chr7	16501106	16570205	-	ENSG00000171243.7	SOSTDC1	0.895427	Lung	1.78859	0.897482	19.8388	4.35859	0.021674	0.72586	4.65547
chr7	16793160	16824161	+	ENSG00000106537.7	TSPAN13	0.860565	Lung	9.32804	17.2262	106.735	9.91985	8.44202	13.9809	30.3984
chr7	16831435	16873057	-	ENSG00000106541.7	AGR2	0.870121	Stomach	4.88453	0	9.89725	184.465	0.3004	1.28129	127.385
chr7	27210210	27219880	-	ENSG00000253293.3	HOXA10	0.995815	Intestine	0.143456	0	0.093928	0.079314	0.0207415	0.046633	15.2964
chr7	27233122	27239725	-	ENSG00000106031.6	HOXA13	0.999525	Intestine	0	0	0.003603	0.018073	0.0083535	0.0083075	13.4462
chr7	29603427	29606911	+	ENSG00000176532.3	PRR15	0.944804	Intestine	0.349172	0.129437	0.870085	7.76937	0.103979	0.557228	29.529
chr7	30174426	30202378	+	ENSG00000180354.11	C7orf41	0.925684	Brain	6.02569	263.552	37.221	23.533	3.41393	18.708	28.6161
chr7	30737601	30797218	+	ENSG00000241644.2	INMT	0.953147	Lung	4.61239	0.191829	156.067	7.78205	12.8027	13.5851	4.8997
chr7	30791753	30931696	+	ENSG00000254959.2	INMT-FAM188B	0.91768	Lung	0.849056	0	26.2385	2.08098	3.65097	4.61097	1.7677
chr7	31092076	31151089	+	ENSG00000078549.10	ADCYAP1R1	0.936285	Brain	0.858167	38.1583	1.35193	6.81633	0.064964	1.52603	3.97017
chr7	36429415	36493400	+	ENSG00000011426.6	ANLN	0.9178	Brain	8.32916	28.6851	0.644355	1.97506	0.171024	0.408187	2.61976
chr7	38423305	38671167	-	ENSG00000078053.12	AMPH	0.961175	Brain	0.848394	26.5596	0.449056	3.02345	0.238556	0.475241	1.15228
chr7	41724712	41742706	-	ENSG00000122641.9	INHBA	0.867804	Lung	2.12208	0.698296	12.4452	1.96011	2.95667	1.44201	0.692091
chr7	43152198	43605600	+	ENSG00000002746.10	HECW1	0.974909	Brain	0.620399	14.0748	0.157862	0.312175	0.135139	0.590659	0.30265
chr7	44256749	44374176	-	ENSG00000058404.15	CAMK2B	0.961234	Brain	0.240405	58.6577	0.143357	0.23305	2.20142	10.4469	0.378441
chr7	44552134	44580914	-	ENSG00000015520.10	NPC1L1	0.986404	Liver	0.106143	0.0150595	0.090855	0.476504	10.6903	0.0337055	0.149773
chr7	45120037	45128513	-	ENSG00000136274.8	NACAD	0.935117	Brain	0.583467	18.6679	1.34588	2.97669	0.0955065	0.693385	1.57242
chr7	45613739	45762715	+	ENSG00000164742.10	ADCY1	0.935337	Brain	0.484949	28.0659	1.11797	0.392481	5.8196	2.5763	0.497632
chr7	45927956	45933267	+	ENSG00000146678.5	IGFBP1	0.999759	Liver	0	0.158342	0.088824	0.125992	317.411	0.0625815	0.024147
chr7	45951949	45961473	-	ENSG00000146674.10	IGFBP3	0.913011	Liver	7.60112	4.31345	20.6562	30.2523	216.565	15.1682	35.0406
chr7	54610018	54638773	+	ENSG00000170419.6	VSTM2A	0.978372	Brain	0	26.6467	0	0.791985	0	0.012903	2.65306
chr7	70597155	71178585	+	ENSG00000185274.7	WBSCR17	0.868016	Brain	2.64878	16.6852	3.11039	1.15694	0.209616	3.59843	2.48892
chr7	73007524	73038873	-	ENSG00000009950.11	MLXIPL	0.979271	Liver	0.178498	2.16056	0.563897	0.38845	44.2672	0.951179	1.26319
chr7	73113536	73134002	-	ENSG00000106089.7	STX1A	0.949208	Brain	0.874636	20.3233	0.740094	2.24088	0.224218	0.745285	1.36848
chr7	73183328	73184600	-	ENSG00000165215.5	CLDN3	0.851311	Intestine	0.182863	0.019714	2.28452	0.278291	4.57619	31.4594	43.4924
chr7	75931861	75933612	+	ENSG00000106211.8	HSPB1	0.85894	Esophagus	804.048	26.7568	81.4268	265.097	60.6201	125.243	121.368
chr7	76139745	76648340	+	ENSG00000243566.2	UPK3B	0.934934	Lung	13.5888	0.423841	41.8878	0.679615	0.321479	0.792676	0.546463
chr7	77646393	79082890	-	ENSG00000187391.13	MAGI2	0.909897	Brain	1.60165	26.5676	2.89892	3.26836	0.781081	3.61712	2.19578
chr7	82383329	82792246	-	ENSG00000186472.15	PCLO	0.909352	Brain	2.33113	15.1774	0.822262	0.417206	0.111582	3.31984	1.25275
chr7	84624869	84816171	-	ENSG00000153993.9	SEMA3D	0.925962	Thyroid	1.2076	1.70575	4.9196	2.057	0.777449	31.0221	3.11352
chr7	86273230	86494200	+	ENSG00000198822.6	GRM3	0.999386	Brain	0	23.516	0.028361	0.009475	0.009626	0.024377	0.0148005
chr7	87031013	87109751	-	ENSG00000005471.11	ABCB4	0.987169	Liver	0.948081	0.343815	0.224173	0.550621	47.7817	0.494606	1.11734
chr7	87563458	87832204	+	ENSG00000008277.10	ADAM22	0.942245	Brain	1.10736	30.3681	2.16241	1.04955	0.199655	4.37129	1.63309
chr7	92728829	92747336	-	ENSG00000205413.3	SAMD9	0.915316	Esophagus	69.7975	1.20848	9.92236	8.75548	2.15081	3.44094	9.98641
chr7	92817899	92855837	-	ENSG00000188175.5	HEPACAM2	0.994651	Intestine	0.0453925	0.08397	0.046243	0.616958	0.0041735	0.0111815	25.1714
chr7	94926988	95025673	-	ENSG00000005421.4	PON1	0.999215	Liver	0	0.183116	0.194943	0.179554	138.881	0.055085	0.0411315
chr7	94989256	95025680	-	ENSG00000105852.6	PON3	0.981277	Liver	0.844043	0.796241	9.42319	1.23856	160.542	3.63742	2.09569
chr7	95401866	95739634	+	ENSG00000158560.10	DYNC1I1	0.898858	Brain	1.23809	21.9254	0.894319	4.68856	0.204382	1.87047	4.40965
chr7	98444111	98468394	-	ENSG00000166448.10	TMEM130	0.975421	Brain	0.056645	22.2966	1.89942	0.688543	0.0186995	0.10048	0.524332
chr7	99245817	99277621	-	ENSG00000106258.9	CYP3A5	0.942355	Liver	27.7499	0.255571	14.4177	56.9673	415.994	0.231356	44.2583
chr7	99302660	99332819	-	ENSG00000160870.8	CYP3A7	0.996226	Liver	0.044649	0.0207355	1.02031	0.283428	72.0015	0.095976	0.165268
chr7	99354604	99381888	-	ENSG00000160868.10	CYP3A4	0.999599	Liver	0.332628	0.012723	0.065853	0.823615	752.873	0.055007	0.520718
chr7	99425636	99463718	+	ENSG00000021461.12	CYP3A43	0.995475	Liver	0.0141105	0.213125	0.068562	0.033167	14.6659	0.034716	0.034534
chr7	99564343	99573780	-	ENSG00000160862.8	AZGP1	0.993737	Liver	4.20554	1.98931	2.95714	8.3626	496.083	0.277046	0.848696
chr7	100060982	100076902	-	ENSG00000166925.4	TSC22D4	0.864785	Brain	17.0785	106.928	16.6358	19.655	7.4326	13.9132	12.0348
chr7	100081550	100092422	+	ENSG00000166924.4	NYAP1	0.973458	Brain	0.306197	10.5511	0.177486	0.463376	0.126304	0.262582	0.344311
chr7	100218039	100240402	-	ENSG00000106327.8	TFR2	0.997925	Liver	0.328084	1.43949	0.22478	0.484093	223.297	0.138388	0.165023
chr7	100547187	100611118	+	ENSG00000169894.13	MUC3A	0.934171	Intestine	0.055098	0.003619	0.170109	1.46801	2.93902	0.19597	12.2333
chr7	100612904	100662230	+	ENSG00000205277.5	MUC12	0.975	Intestine	0.0282445	0.524728	0.443052	0.848762	0.0565115	0.0519895	13.022
chr7	100770370	100782547	+	ENSG00000106366.7	SERPINE1	0.911614	Liver	4.82653	1.71734	8.8238	8.47431	50.9688	1.64668	1.54078
chr7	100805790	100808874	-	ENSG00000128564.5	VGF	0.990043	Brain	0	13.3462	0.007322	0.395459	0	0.0236435	0.370871
chr7	102277496	102312088	-	ENSG00000267645.1	POLR2J2	0.955098	Esophagus	10.0731	2.70907	0.000584	0.004148	0	0	0
chr7	107301080	107358254	+	ENSG00000091137.7	SLC26A4	0.996472	Thyroid	0.12297	1.71073	0.45636	0.287596	0.066479	135.785	0.23048
chr7	107405912	107443670	-	ENSG00000091138.8	SLC26A3	0.999729	Intestine	0	0	0.005226	0.448402	0.057322	0.205125	440.292
chr7	107788068	108097161	-	ENSG00000091129.15	NRCAM	0.98483	Brain	0.683609	69.9448	2.03978	0.418538	0.300167	2.34262	0.581807
chr7	116164839	116201233	+	ENSG00000105974.7	CAV1	0.862023	Lung	38.5852	2.19971	399.31	91.923	5.37554	94.6913	97.7982
chr7	117105838	117356025	+	ENSG00000001626.10	CFTR	0.944772	Intestine	0.529111	0.890917	4.42882	4.36612	2.40024	0.050653	38.2229
chr7	121513143	121702090	+	ENSG00000106278.7	PTPRZ1	0.963278	Brain	11.6073	82.1267	0.504936	3.11399	0.069868	0.09822	2.70084
chr7	124386051	124405681	-	ENSG00000170775.2	GPR37	0.964777	Brain	1.32104	31.792	0.214938	0.633121	4.07247	0.0540705	0.423243
chr7	127667124	127672160	-	ENSG00000128594.3	LRRC4	0.901458	Brain	1.52232	19.1455	3.45198	3.40997	1.38349	0.635739	0.916322
chr7	128095903	128098472	+	ENSG00000135245.9	HILPDA	0.898589	Esophagus	29.9735	3.22182	3.42048	3.38347	1.22263	3.52425	3.46524
chr7	128430811	128462186	+	ENSG00000128596.12	CCDC136	0.860547	Brain	1.90394	20.4164	0.776681	6.53611	0.190704	0.934482	6.74085
chr7	129932974	129964020	+	ENSG00000128510.6	CPA4	0.996231	Esophagus	11.0139	0.167521	0.037	0.028624	0.0119325	0	0.003989
chr7	134212344	134226160	+	ENSG00000198074.5	AKR1B10	0.878457	Stomach	48.5568	0	0.079511	87.1832	2.26888	0.133384	12.5402
chr7	137065783	137531838	-	ENSG00000157680.11	DGKI	0.884797	Thyroid	0.237173	17.0298	0.138787	0.502854	0.0381775	26.7299	0.529472
chr7	137687070	137802732	+	ENSG00000122787.10	AKR1D1	0.999774	Liver	0	0	0.004169	0.033239	76.3699	0.046767	0.0192665
chr7	140774032	141180180	+	ENSG00000261115.1	TMEM178B	0.859686	Brain	1.19518	11.397	0.455849	0.662501	0.0621955	6.39049	0.828722
chr7	143050493	143059863	-	ENSG00000159784.13	FAM131B	0.973161	Brain	0.171563	26.806	0.594019	0.510637	0.065682	0.17588	2.79887
chr7	145813453	148118090	+	ENSG00000174469.13	CNTNAP2	0.970451	Brain	0.243514	21.488	0.08348	0.483533	1.80737	0.278135	0.913644
chr7	150035408	150038763	-	ENSG00000106538.5	RARRES2	0.886334	Liver	17.8836	3.34355	85.012	51.6129	304.476	13.6164	36.1823
chr7	150488373	150498448	-	ENSG00000106565.13	TMEM176B	0.903458	Liver	13.7143	4.81152	32.9461	48.2399	350.821	13.0364	90.4651
chr7	150497491	150502208	+	ENSG00000002933.3	TMEM176A	0.917153	Liver	9.7058	3.60235	17.8552	26.3229	209.944	6.50715	40.3665
chr7	150521715	150558592	+	ENSG00000002726.15	AOC1	0.977307	Intestine	0.638221	0	0.170581	8.40675	0.0578265	0.11332	68.9393
chr7	150709297	150721586	-	ENSG00000181652.14	ATG9B	0.993485	Esophagus	21.7434	0.359169	0.201013	0.095884	0.032667	0.100016	0.0611645
chr7	151072995	151107813	-	ENSG00000187260.11	WDR86	0.933311	Thyroid	0.937752	3.51264	2.25906	2.11146	1.18531	32.6072	3.04098
chr7	151125921	151137899	-	ENSG00000127377.4	CRYGN	0.995221	Thyroid	0.0748905	0.190978	0.124121	0.110778	0.0376845	25.3988	0.189906
chr7	153584182	154685995	+	ENSG00000130226.12	DPP6	0.86027	Brain	0.241228	30.6422	1.25483	5.88859	0.014602	12.9733	5.31727
chr7	155089486	155101945	+	ENSG00000186480.8	INSIG1	0.895608	Liver	9.61414	19.5213	24.9814	14.6932	150.151	7.93172	17.3054
chr7	157331750	158380480	-	ENSG00000155093.13	PTPRN2	0.866831	Brain	1.12545	27.1293	3.35093	5.9191	0.569847	4.0661	6.64525
chr8	1922044	1955102	+	ENSG00000176595.3	KBTBD11	0.868859	Brain	0.935622	25.9127	2.7138	1.67334	4.04365	2.38599	8.63687
chr8	2792875	4852494	-	ENSG00000183117.13	CSMD1	0.993595	Brain	0.12749	16.2596	0.260262	0.049613	0.0057245	0.103628	0.0781855
chr8	6728097	6735544	-	ENSG00000164825.3	DEFB1	0.864602	Esophagus	45.6987	0	0.38821	1.3615	34.3749	0.083637	0.916933
chr8	11278972	11332224	-	ENSG00000154319.10	FAM167A	0.915279	Thyroid	0.8192	7.76825	9.08658	0.261581	0.180279	37.2533	0.820913
chr8	12803151	12889012	+	ENSG00000250305.4	KIAA1456	0.948421	Thyroid	1.59066	8.45781	5.31039	1.04227	2.93831	74.0515	3.57739
chr8	15965387	16424999	-	ENSG00000038945.10	MSR1	0.920827	Lung	5.39222	2.80885	81.0495	7.92316	11.4051	4.74215	6.22999
chr8	17155539	17271037	-	ENSG00000003987.9	MTMR7	0.943013	Brain	0.169155	13.3844	0.67886	0.497559	0.389029	2.27404	0.567802
chr8	17354597	17428082	+	ENSG00000003989.12	SLC7A2	0.93905	Liver	4.87214	3.13592	8.54661	4.10175	121.609	19.8965	3.91977
chr8	17433942	17501580	+	ENSG00000104213.8	PDGFRL	0.898099	Thyroid	0.507838	0.558414	1.74168	5.60792	0.160479	16.5004	1.51211
chr8	17721889	17767874	-	ENSG00000104760.12	FGL1	0.999465	Liver	0	0.419148	0.144735	0.270571	294.475	0.059174	0.051485
chr8	18248755	18258728	+	ENSG00000156006.4	NAT2	0.962087	Liver	0.024621	0.037856	0.07551	0.055118	14.0185	0.017501	2.97831
chr8	19759228	19824769	+	ENSG00000175445.10	LPL	0.947974	Lung	0.449548	3.0206	40.3912	3.15655	0.254071	2.76941	2.95807
chr8	22004338	22014597	-	ENSG00000168481.4	LGI3	0.915319	Brain	1.60349	28.1826	7.5829	0.135838	0.0098245	4.88851	0.0985595
chr8	22014426	22021992	+	ENSG00000168484.8	SFTPC	0.999873	Lung	0	1.59086	4074.96	0.260728	0.245878	1.00189	0
chr8	22077222	22089854	-	ENSG00000168490.9	PHYHIP	0.985661	Brain	2.24886	66.3884	0.511203	0.710503	0.082791	0.854433	1.30406
chr8	22570769	22857513	-	ENSG00000134020.6	PEBP4	0.900815	Lung	0.229077	2.62892	30.4885	0.791647	0.143859	13.83	0.520505
chr8	24241798	24263526	+	ENSG00000134028.10	ADAMDEC1	0.988946	Intestine	1.57214	0	0.199598	2.76243	0.0607705	0.544432	77.4866
chr8	24770525	24776607	+	ENSG00000104722.9	NEFM	0.99481	Brain	0.23246	27.566	0.023916	0.355955	0	0.0085475	0.237495
chr8	26362202	26371608	-	ENSG00000240694.4	PNMA2	0.97902	Brain	0.314861	61.0854	3.89387	0.882051	0.609964	0.917798	1.07089
chr8	26605667	26724790	-	ENSG00000120907.13	ADRA1A	0.94331	Liver	0.730739	7.66461	9.84251	2.14584	66.0196	0.530445	1.54181
chr8	27092840	27115937	-	ENSG00000015592.12	STMN4	0.996808	Brain	0.0147755	37.5949	0.025556	0.205802	0	0	0.473936
chr8	33448856	33457624	-	ENSG00000133878.4	DUSP26	0.933773	Brain	0.412309	11.6853	1.40039	1.44241	0.0785955	0.364768	0.944783
chr8	50822349	51706678	+	ENSG00000147481.9	SNTG1	0.996208	Brain	0	13.0884	0	0.018141	0.260879	0	0.0187645
chr8	53023399	53373519	-	ENSG00000147488.7	ST18	0.992561	Brain	0.418779	42.9856	0.163546	0.348886	0.22823	0.272493	0.486674
chr8	63961112	63998612	-	ENSG00000137561.4	TTPA	0.982928	Liver	0.08033	1.65576	0.989573	0.345274	54.4189	0.029187	2.47406
chr8	67372238	67430759	+	ENSG00000169085.7	C8orf46	0.946966	Brain	0.451529	42.3962	2.48357	1.6716	6.33483	1.41872	1.1304
chr8	75233365	75401107	+	ENSG00000104381.8	GDAP1	0.893284	Brain	2.74627	26.6581	2.69291	2.40733	0.867838	6.02276	2.33202
chr8	80523049	80578410	+	ENSG00000104435.9	STMN2	0.978144	Brain	0.0213135	49.1278	0.016321	1.70897	0.251669	0.0243855	4.41989
chr8	82192598	82197012	+	ENSG00000164687.6	FABP5	0.983514	Esophagus	676.506	7.13704	23.3767	11.3946	1.50512	8.45613	15.0486
chr8	82352561	82359758	-	ENSG00000147588.6	PMP2	0.996305	Brain	0.468363	75.8555	0.023278	0.462942	0.0437545	0.132284	0.551015
chr8	85095022	85834079	+	ENSG00000184672.7	RALYL	0.994344	Brain	0	13.4094	0.004346	0.064072	0.229308	0	0.15734
chr8	86239837	86291243	-	ENSG00000133742.9	CA1	0.99949	Intestine	0	0.006834	0.258382	0.287962	0.0310395	0.0270125	199.554
chr8	86376081	86393722	+	ENSG00000104267.5	CA2	0.870173	Intestine	5.06378	27.739	17.6114	63.8775	42.7552	2.18644	204.418
chr8	89044237	89340254	-	ENSG00000156103.11	MMP16	0.911935	Brain	0.827889	10.4245	0.42276	2.42198	0.179575	0.558188	1.09779
chr8	91803778	91971636	+	ENSG00000123119.7	NECAB1	0.971857	Brain	0.0067535	29.4459	3.98699	0.420352	0.017403	0.242193	0.298449
chr8	92221722	92410378	+	ENSG00000147606.4	SLC26A7	0.999038	Thyroid	0.066427	0.15793	0.378318	0.359481	0.123742	265.163	0.444663
chr8	95139399	95229531	-	ENSG00000079112.5	CDH17	0.996833	Intestine	1.09661	0.0042805	0.029604	1.33554	0.0414595	0.0218595	133.13
chr8	97657455	98161882	+	ENSG00000104324.11	CPQ	0.854562	Thyroid	11.369	6.81948	19.6587	24.8164	15.5896	108.695	16.5974
chr8	99114572	99129469	-	ENSG00000132541.6	HRSP12	0.960183	Liver	5.24527	10.925	3.64989	5.09473	143.068	4.22959	5.03452
chr8	104152938	104242533	+	ENSG00000164929.12	BAALC	0.974075	Brain	0.491011	72.604	6.19208	0.755078	1.03205	1.72852	1.09469
chr8	104512976	105268322	+	ENSG00000176406.16	RIMS2	0.990494	Brain	0.69851	29.2068	0.041907	0.368327	0.0043195	0.379074	0.173755
chr8	105342552	105479281	-	ENSG00000147647.8	DPYS	0.998556	Liver	0.060476	0.685126	0.292026	0.150224	147.911	0.0463615	0.047254
chr8	110374706	110542559	+	ENSG00000205038.7	PKHD1L1	0.959911	Thyroid	1.7905	0.0093755	4.57573	0.843916	0.286017	36.4136	1.25311
chr8	119935796	119964439	-	ENSG00000164761.4	TNFRSF11B	0.93803	Thyroid	0.596351	0.4802	1.47131	0.398837	2.76366	17.6023	0.834511
chr8	120007691	120118821	+	ENSG00000184374.2	COLEC10	0.988521	Liver	0.0478735	0.200914	0.986727	0.023912	29.2538	0.666973	0.088466
chr8	124191200	124222314	+	ENSG00000147689.12	FAM83A	0.996882	Esophagus	18.8653	0	0.058851	0.042976	0.0118095	0.206035	0.033214
chr8	124864227	125132302	+	ENSG00000214814.2	FER1L6	0.878809	Stomach	0.071601	0.047332	0.057294	10.5922	0.0191445	1.28409	6.22261
chr8	130760442	130799134	-	ENSG00000147697.4	GSDMC	0.996847	Esophagus	13.4997	0.027595	0.078495	0.087736	0.002383	0.0375885	0.0215755
chr8	133133108	133493200	-	ENSG00000184156.11	KCNQ3	0.976421	Brain	0.121702	15.948	1.24506	0.277224	0.0308175	0.190019	0.391414
chr8	133879203	134147147	+	ENSG00000042832.7	TG	0.999921	Thyroid	0.49476	0.227304	1.68604	0.756319	0.501173	8365.71	0.305559
chr8	136469700	136668965	+	ENSG00000131773.9	KHDRBS3	0.906729	Brain	2.93333	36.7045	4.47227	3.74326	3.19152	2.27641	3.92391
chr8	143530791	143626370	+	ENSG00000181790.6	BAI1	0.979799	Brain	0.39014	24.3064	0.749307	0.612031	0.131495	0.538968	0.524155
chr8	143751726	143764142	+	ENSG00000167653.4	PSCA	0.876038	Stomach	23.1539	0.161662	0.283769	32.1236	0.045543	0.116165	0.131533
chr8	143822362	143823829	-	ENSG00000126233.1	SLURP1	1	Esophagus	189.207	0	0	0	0	0	0
chr8	143831568	143833952	-	ENSG00000197353.3	LYPD2	0.998957	Esophagus	78.9496	0	0.242898	0.131979	0.119168	0	0
chr8	143845752	143859640	-	ENSG00000180155.14	LYNX1	0.850742	Esophagus	73.3562	30.9398	5.06331	13.1394	6.9828	4.20686	5.36187
chr8	143866296	143868008	-	ENSG00000167656.4	LY6D	0.999918	Esophagus	220.861	0.0972235	0	0	0	0	0.012096
chr8	144239331	144242128	-	ENSG00000176956.8	LY6H	0.973924	Brain	0.150123	30.6744	0.268586	1.38797	0	0.062882	2.92959
chr8	144295068	144299044	+	ENSG00000182851.2	GPIHBP1	0.928422	Lung	0.734517	5.09907	19.9811	0.867993	0.461891	0.925752	0.491963
chr8	145728356	145732557	+	ENSG00000167701.9	GPT	0.930236	Liver	0.584075	1.78025	0.491147	3.36034	48.6345	0.856487	13.2855
chr9	6532464	6645650	-	ENSG00000178445.8	GLDC	0.932758	Liver	0.605984	4.07655	0.212902	0.334547	19.9731	2.04891	0.779308
chr9	8314246	10612723	-	ENSG00000153707.11	PTPRD	0.917199	Brain	1.76597	56.79	7.87303	1.37366	3.57545	6.02387	7.60163
chr9	17579080	17797127	+	ENSG00000107295.8	SH3GL2	0.987744	Brain	0.0676715	36.7903	1.2784	0.354255	0.0832005	0.603174	0.31872
chr9	19108373	19149288	-	ENSG00000147872.5	PLIN2	0.902237	Liver	8.4922	3.75996	36.9666	14.8329	149.252	9.11176	14.3843
chr9	19507450	19786926	-	ENSG00000155886.7	SLC24A2	0.999439	Brain	0.0048985	38.3523	0.007392	0.03939	0.000818	0.0034625	0.073159
chr9	23690102	23826335	-	ENSG00000107105.10	ELAVL2	0.994277	Brain	0.071183	15.5481	0.042256	0.056818	0.002269	0.084928	0.276462
chr9	26993134	27005691	-	ENSG00000184434.7	LRRC19	0.996591	Intestine	0	0.011735	0.32726	0.059406	0.104718	0.004518	24.8174
chr9	27109139	27230173	+	ENSG00000120156.16	TEK	0.85988	Lung	3.78047	2.16528	29.0994	4.11482	4.45029	6.56133	3.39229
chr9	33218363	33248565	+	ENSG00000122711.4	SPINK4	0.986498	Intestine	0	0	0	1.20907	0	0	14.9244
chr9	33441152	33447609	-	ENSG00000165272.10	AQP3	0.947439	Esophagus	275.052	0.236894	46.7501	6.27527	27.7364	1.4806	4.26255
chr9	34521038	34523039	-	ENSG00000168913.6	ENHO	0.965482	Brain	0.188947	45.5461	1.69097	0.946106	4.29142	0.328427	1.98706
chr9	34551430	34590121	-	ENSG00000122756.10	CNTFR	0.882952	Brain	0.367164	12.3855	1.27439	1.99642	2.29746	1.72995	1.03283
chr9	34957484	34982541	+	ENSG00000122733.11	KIAA1045	0.987873	Brain	0.267553	20.228	0.159319	0.400965	0.0748585	0.308431	0.260737
chr9	35681989	35691017	-	ENSG00000198467.9	TPM2	0.902629	Stomach	94.5577	5.34343	17.0665	338.685	2.34865	7.09127	71.4604
chr9	37422663	37436987	+	ENSG00000137106.13	GRHPR	0.855939	Liver	20.9102	25.0744	21.7078	25.8597	157.887	23.3411	19.5789
chr9	38408991	38424444	-	ENSG00000137142.4	IGFBPL1	0.96583	Thyroid	0.0762175	0.903774	0.44123	0.567088	0.178713	11.6153	0.214337
chr9	71939488	72007371	+	ENSG00000135063.13	FAM189A2	0.873693	Thyroid	3.8349	5.41025	22.0143	5.91781	0.235884	53.2121	2.91342
chr9	75766673	75785309	+	ENSG00000135046.9	ANXA1	0.980177	Esophagus	3910.01	5.26282	203.679	66.3578	12.5801	121.35	55.8247
chr9	77112281	77308093	+	ENSG00000198963.6	RORB	0.967529	Brain	0.480513	13.2474	0.43738	0.62171	0.122242	0.535698	0.383373
chr9	77337411	77503010	-	ENSG00000119121.17	TRPM6	0.968409	Intestine	0.511796	1.33871	0.294484	0.32632	0.0688235	0.199362	14.4531
chr9	87283466	87638505	+	ENSG00000148053.11	NTRK2	0.885486	Brain	5.99659	177.726	3.89399	4.04694	0.817003	103.948	3.41079
chr9	91628060	91793682	-	ENSG00000148082.5	SHC3	0.941911	Brain	0.949087	29.1365	6.58235	1.16966	0.073776	0.548605	0.831657
chr9	93372114	93405386	-	ENSG00000165023.5	DIRAS2	0.989202	Brain	0.0176815	32.0344	0.053863	0.121036	0.11242	1.57965	0.190895
chr9	96713905	96717654	-	ENSG00000131668.9	BARX1	0.999359	Stomach	0	0.008302	0.011665	70.8963	0.039602	0.141266	0.0717755
chr9	97365415	97402531	-	ENSG00000165140.5	FBP1	0.922572	Liver	1.68687	0.375303	82.099	18.0692	264.088	10.3533	10.1031
chr9	100615536	100618986	+	ENSG00000178919.7	FOXE1	0.997271	Thyroid	2.71812	0.0078375	0.050707	0.032594	0.020733	173.018	0.0030995
chr9	101050391	101471479	-	ENSG00000136928.4	GABBR2	0.99022	Brain	0.009303	28.4667	0.033013	0.094291	0.032884	1.48738	0.013554
chr9	103204560	103339918	+	ENSG00000241697.3	TMEFF1	0.930649	Brain	0.733576	16.8985	0.921738	1.33471	0.155456	2.65812	1.22798
chr9	103790991	104087417	+	ENSG00000148123.10	LPPR1	0.953904	Brain	0.102499	11.6269	0.945795	0.031112	2.00805	0.0129105	0.115357
chr9	104122699	104145801	-	ENSG00000136881.7	BAAT	0.999389	Liver	0.003858	0.377935	0.165141	0.215211	234.629	0.0570585	0.040248
chr9	104182860	104198105	-	ENSG00000136872.13	ALDOB	0.999458	Liver	0	0.0853905	0.119675	4.74254	1822.21	0.097325	0.879683
chr9	108210077	108314714	+	ENSG00000106701.7	FSD1L	0.853015	Brain	1.1857	14.8136	3.79009	2.40444	0.468056	2.5557	2.66022
chr9	111892573	111929571	-	ENSG00000260230.2	FRRS1L	0.955304	Brain	0.861757	20.1339	0.052357	3.65548	0.0040775	0.167405	0.658342
chr9	112952328	112970469	-	ENSG00000188959.9	C9orf152	0.93343	Intestine	0.960651	0	3.23244	1.73754	0.123316	0.0848415	15.3693
chr9	113006091	113018920	-	ENSG00000136810.8	TXN	0.889574	Esophagus	420.339	22.7425	42.5209	39.8947	52.9141	28.9286	91.4974
chr9	114287439	114340124	+	ENSG00000173258.8	ZNF483	0.856649	Brain	3.82267	57.2394	6.0461	9.50069	1.01181	22.4621	6.38845
chr9	114312002	114362135	-	ENSG00000106853.12	PTGR1	0.851651	Liver	47.4292	6.8036	9.49291	14.159	116.61	13.7945	12.1144
chr9	116822407	116840752	-	ENSG00000106927.7	AMBP	0.999848	Liver	0.0290415	0.0121945	0.325034	1.47251	2682.71	0.419218	0.1869
chr9	117085336	117088755	+	ENSG00000229314.4	ORM1	0.999738	Liver	0	0	1.32062	0.894241	1606.18	0.268668	0.041726
chr9	117092149	117095532	+	ENSG00000228278.2	ORM2	0.999688	Liver	0	0	0.563606	0.741504	796.184	0.166328	0.020862
chr9	119187504	120177348	-	ENSG00000148219.12	ASTN2	0.880161	Brain	1.05862	13.3947	1.37573	2.20156	1.21433	1.31274	2.46823
chr9	121915736	122131745	-	ENSG00000078725.8	BRINP1	0.984935	Brain	0.155859	16.4465	0.89507	0.033966	0.20314	0.13014	0.068439
chr9	123714616	123812554	-	ENSG00000106804.6	C5	0.982154	Liver	2.43668	2.74281	7.3472	3.26703	184.488	2.13169	1.82899
chr9	126763949	126795580	+	ENSG00000106689.6	LHX2	0.97809	Brain	0.005701	10.7703	0	0.014277	1.37864	0	0.0172185
chr9	130374544	130457460	+	ENSG00000136854.13	STXBP1	0.931234	Brain	4.56071	119.026	16.9065	8.85311	1.46073	11.9803	5.34839
chr9	130911350	130915734	+	ENSG00000148346.7	LCN2	0.921478	Esophagus	141.243	0	3.46733	18.7483	0.828947	0.433229	43.0664
chr9	130965658	131017527	+	ENSG00000106976.14	DNM1	0.96717	Brain	5.0523	125.005	3.20938	7.44416	1.29774	2.64177	4.97793
chr9	131174030	131199626	+	ENSG00000167123.14	CERCAM	0.911208	Brain	6.5229	77.867	6.13861	9.32704	1.24267	10.9916	7.26079
chr9	132934857	132999583	+	ENSG00000107130.6	NCS1	0.855141	Brain	2.71193	39.2743	1.23459	9.45342	0.348453	7.72366	12.6635
chr9	133320316	133376661	+	ENSG00000130707.13	ASS1	0.949594	Liver	12.7965	7.66214	15.4074	19.9385	525.663	40.1598	63.0167
chr9	133884469	133969860	+	ENSG00000050555.13	LAMC3	0.893758	Lung	1.2114	0.906567	11.1793	0.394354	3.50047	0.365841	0.747648
chr9	136444079	136451319	-	ENSG00000196990.4	FAM163B	0.964072	Brain	0	14.0186	0	0.02436	2.47682	0	0.520797
chr9	136528682	136605077	-	ENSG00000123453.12	SARDH	0.979423	Liver	0.506753	1.10747	1.62297	0.944872	60.2202	2.07372	1.17903
chr9	137772654	137779924	+	ENSG00000160339.11	FCN2	0.998731	Liver	0.014888	0.0322955	0.050218	0.050113	32.9522	0.103406	0
chr9	137967268	138013025	+	ENSG00000130558.14	OLFM1	0.967908	Brain	4.48885	133.083	5.97748	5.36395	1.29845	3.32686	5.16979
chr9	138594031	138684992	+	ENSG00000107147.7	KCNT1	0.991193	Brain	0.076093	11.4365	0.213103	0.129799	0.0163885	0.0589365	0.110017
chr9	139839698	139841426	+	ENSG00000176919.7	C8G	0.993863	Liver	0.320816	0.347544	0.551867	0.487338	101.051	0.750265	1.26309
chr9	139844003	139849949	+	ENSG00000184925.7	LCN12	0.9575	Thyroid	0.149861	2.21437	0.263989	0.235481	4.37739	33.3544	1.26432
chr9	139901686	139923367	-	ENSG00000107331.12	ABCA2	0.896084	Brain	4.73082	105.266	9.23473	7.52131	8.65348	25.0488	10.4432
chr9	140032842	140063207	+	ENSG00000176884.10	GRIN1	0.999017	Brain	0.0289865	76.5209	0.037531	0.100424	0.0040865	0.011739	0.268363
chr9	140063210	140064503	-	ENSG00000184709.7	LRRC26	0.982409	Intestine	0.884516	0.116589	0.412882	0.176372	0.0313635	0.0292965	15.6423
chr9	140114707	140116033	-	ENSG00000212864.2	RNF208	0.857923	Brain	4.38808	16.9584	1.44654	2.45026	1.94462	3.34144	0.88544
chr9	140119087	140120763	+	ENSG00000197191.3	C9orf169	0.996911	Esophagus	85.8706	0.344768	0.238023	0.15934	0.14412	0.607402	0.0977625
chr9	140194083	140196703	-	ENSG00000198435.2	NRARP	0.874493	Intestine	6.90648	3.64551	7.7749	4.05333	1.2757	2.95771	35.3416
chr9	140328816	140336268	-	ENSG00000188833.5	ENTPD8	0.92727	Intestine	0.037889	0.046414	0.046687	1.74525	4.44554	0.18723	14.9159
chr9	140342022	140353786	-	ENSG00000165802.15	NSMF	0.87023	Brain	4.55409	59.7345	6.4882	10.2341	6.75793	8.48826	9.98788
chr9	140772241	141019076	+	ENSG00000148408.8	CACNA1B	0.99278	Brain	0.00363	12.4354	0.011061	0.128409	0.002075	0.153515	0.239983
chr10	1228073	1779670	-	ENSG00000185736.11	ADARB2	0.953733	Brain	0.63802	10.002	0.970135	0.39575	0.256145	0.163317	0.353192
chr10	4934796	5025475	+	ENSG00000187134.8	AKR1C1	0.921924	Liver	9.64023	2.1681	6.56031	13.4438	84.2516	4.70685	2.9488
chr10	5196335	5244449	-	ENSG00000196326.6	AKR1CL1	0.997398	Liver	0	0	0.141351	0	10.4071	0.009365	0.011732
chr10	5237425	5260912	+	ENSG00000198610.6	AKR1C4	0.999383	Liver	0.00146	0	0.036226	0.099486	58.3121	0.0194895	0.059069
chr10	5566924	5568225	+	ENSG00000178363.3	CALML3	0.99984	Esophagus	243.231	0.062819	0.024955	0.012921	0.105664	0.013697	0.0129135
chr10	7745232	7791483	+	ENSG00000151655.13	ITIH2	0.999491	Liver	0	0.665475	0.474261	0.3226	548.096	0.191189	0.0213015
chr10	12110971	12165224	+	ENSG00000181192.7	DHTKD1	0.858525	Liver	5.97385	6.39688	5.95249	6.56227	49.6377	8.81555	8.43395
chr10	13319796	13344412	-	ENSG00000107537.9	PHYH	0.902034	Liver	5.22957	7.48474	8.8656	15.4799	113.343	15.0897	14.473
chr10	15119522	15130775	-	ENSG00000176244.6	ACBD7	0.988215	Brain	0.184104	23.7361	0.355519	0.143771	0.0668365	0.67286	0.255283
chr10	16555742	16564004	-	ENSG00000165985.8	C1QL3	0.991736	Brain	0	11.4146	0.103346	0.110493	0.017555	0.17976	0.15486
chr10	17360382	17496329	-	ENSG00000148488.11	ST8SIA6	0.9287	Lung	1.06573	0.856678	10.5235	0.516898	0.805652	0.583001	0.674012
chr10	25463991	25891155	+	ENSG00000151025.9	GPR158	0.986056	Brain	0.010342	11.359	0.099932	0.285905	0.0438955	0.227212	0.283046
chr10	26505236	26593487	+	ENSG00000136750.7	GAD2	1	Brain	0	10.9871	0	0	0	0	0
chr10	45869661	45941561	+	ENSG00000012779.6	ALOX5	0.859462	Lung	4.85488	1.37162	21.2257	4.24231	1.82882	2.00308	3.59739
chr10	46955444	46971400	-	ENSG00000204176.9	SYT15	0.886083	Lung	1.4806	1.24177	10.1428	1.30036	0.423416	1.76661	0.719885
chr10	47157983	47174093	-	ENSG00000150165.13	ANXA8L1	0.987838	Esophagus	11.9959	0.015304	0.757913	0.008949	0.0885165	0.001169	0.0034895
chr10	48255253	48279200	+	ENSG00000165390.11	ANXA8	0.979255	Esophagus	13.6604	0.025872	1.29668	0.026407	0.314655	0.0095045	0.0272135
chr10	50942689	50970425	-	ENSG00000197444.5	OGDHL	0.888242	Liver	0.0415755	13.2301	0.032953	0.602224	47.3235	17.1595	0.666322
chr10	52559169	52645435	-	ENSG00000148584.10	A1CF	0.981407	Liver	0	0	0.01257	0.171089	75.819	0.0127555	8.26193
chr10	54525140	54531460	-	ENSG00000165471.6	MBL2	0.999922	Liver	0	0	0.005653	0.01589	69.2516	0.0106775	0
chr10	60936350	61007534	+	ENSG00000165443.7	PHYHIPL	0.992926	Brain	0.056204	37.8046	0.061097	0.558432	0.577239	0.0409895	0.310696
chr10	63942794	64028466	-	ENSG00000182010.6	RTKN2	0.984855	Lung	5.15621	0.915345	89.7063	0.330585	0.105087	0.714149	0.930393
chr10	64133951	64431771	+	ENSG00000138311.11	ZNF365	0.927351	Brain	8.3423	27.1213	2.71643	0.183689	0.0303765	0.444483	0.104797
chr10	68685764	68859588	+	ENSG00000198739.6	LRRTM3	0.998175	Brain	0.018744	11.6607	0.019514	0.045276	0.0125315	0.00494	0.026674
chr10	70042417	70092806	-	ENSG00000108187.11	PBLD	0.911975	Liver	1.63108	3.78252	2.55747	13.5958	69.9177	1.89278	13.4673
chr10	72357104	72362531	-	ENSG00000180644.6	PRF1	0.868978	Lung	2.19835	0.216996	21.1775	5.518	4.03208	2.1193	2.56363
chr10	74653339	74692791	+	ENSG00000138315.8	OIT3	0.997443	Liver	0.0355885	0.0234	0.10447	0.149618	32.5524	0.103627	0.0826555
chr10	74694928	74714536	-	ENSG00000138308.5	PLA2G12B	0.987537	Liver	0	0	0.884843	0.076165	23.1625	0.044856	0.726196
chr10	79793518	79816570	+	ENSG00000138326.14	RPS24	0.892218	Esophagus	1045.89	93.3191	106.549	190.932	80.7485	127.31	77.5125
chr10	81315608	81320153	-	ENSG00000185303.11	SFTPA2	0.999899	Lung	0.044091	0.123362	2668.83	0.217491	0.139954	0.312155	0.783972
chr10	81370695	81375196	+	ENSG00000122852.10	SFTPA1	0.999961	Lung	0	0	2272.39	0.12846	0.133658	0.264352	0.0097775
chr10	81697496	81742370	-	ENSG00000133661.11	SFTPD	0.994215	Lung	0.39207	0.568016	116.262	0.214692	0.248807	2.46834	0.143345
chr10	82031576	82049440	-	ENSG00000151224.8	MAT1A	0.999661	Liver	0.088971	0.014483	0.150334	0.227202	368.305	0.198219	0.068929
chr10	83635070	84746935	+	ENSG00000185737.8	NRG3	0.970307	Brain	0.135604	16.3763	0.892157	0.825823	0.569191	0.316875	0.177914
chr10	85933494	85945050	+	ENSG00000188373.4	C10orf99	0.851601	Intestine	28.6615	0	0	0	0	0	32.1896
chr10	85954410	85979377	+	ENSG00000148600.10	CDHR1	0.932313	Intestine	2.73765	4.22796	0.282435	0.273556	0.252326	0.102263	19.3937
chr10	88780063	88784487	+	ENSG00000188100.8	FAM25A	1	Esophagus	338.752	0	0	0	0	0	0
chr10	90424198	90438571	+	ENSG00000182333.10	LIPF	0.999433	Stomach	0	0	0	198.89	0.455645	0.166296	0.0548405
chr10	90581889	90611575	-	ENSG00000152766.5	ANKRD22	0.899373	Esophagus	15.7199	0.104583	0.535403	3.84131	0.281338	0.215264	4.51322
chr10	91342745	91405215	-	ENSG00000152782.12	PANK1	0.866348	Liver	2.43759	3.7657	2.23289	2.28556	30.1507	6.13668	7.31974
chr10	94447945	94455403	+	ENSG00000152804.6	HHEX	0.898756	Thyroid	1.92351	0.759772	7.37806	2.183	15.0222	48.891	2.43308
chr10	95351444	95361501	-	ENSG00000138207.8	RBP4	0.998638	Liver	0.10766	6.25315	8.26727	3.54765	2556.83	0.708317	2.00965
chr10	95517566	95557916	+	ENSG00000108231.7	LGI1	0.952096	Brain	1.90959	15.557	0.027217	0.703717	0.11789	0.131312	1.58176
chr10	96443251	96495947	+	ENSG00000108242.8	CYP2C18	0.889586	Liver	8.0183	0.040437	0.423204	12.2975	32.4734	0.007334	0.726395
chr10	96447911	96613017	+	ENSG00000165841.5	CYP2C19	0.929988	Liver	4.99747	0.064967	0.337076	7.77151	32.0213	0.01261	0.267533
chr10	96698415	96749147	+	ENSG00000138109.9	CYP2C9	0.998518	Liver	1.47878	0	0.173935	3.13014	563.432	0.078644	0.148184
chr10	96796530	96829254	-	ENSG00000138115.9	CYP2C8	0.999351	Liver	0.109533	0.816505	0.289762	0.315792	578.824	0.523956	0.196985
chr10	98102973	98119092	-	ENSG00000197430.6	OPALIN	1	Brain	0	30.0535	0	0	0	0	0
chr10	98757795	98945677	-	ENSG00000187122.12	SLIT1	0.999396	Brain	0	17.146	0.027665	0.005905	0	0.002886	0.0257125
chr10	99344080	99372559	+	ENSG00000241935.4	HOGA1	0.949469	Liver	0.751502	1.86229	0.715979	0.101806	15.4886	1.18071	0.0836395
chr10	99609996	99631337	+	ENSG00000155265.6	GOLGA7B	0.955323	Brain	1.38349	11.8346	0.45218	0.380637	0.272736	0.250661	0.432712
chr10	101542489	101611949	+	ENSG00000023839.6	ABCC2	0.993867	Liver	0.310322	0.165	0.344887	0.40612	49.4619	0.287152	0.306533
chr10	101801950	101841634	-	ENSG00000120054.7	CPN1	0.999836	Liver	0	0	0	0.019776	20.0568	0	0
chr10	103585731	103603677	-	ENSG00000120049.14	KCNIP2	0.923475	Brain	1.19716	20.9075	1.71415	2.02515	0.572168	1.89535	2.19571
chr10	105036920	105050108	+	ENSG00000148798.5	INA	0.99148	Brain	0.171284	31.5641	0.011671	0.50836	0.010167	0.0265795	0.885532
chr10	105253736	105352309	+	ENSG00000107954.6	NEURL	0.915314	Brain	0.251323	18.1716	0.463703	1.37841	0.236801	0.138552	6.76446
chr10	112257596	112271302	+	ENSG00000138166.5	DUSP5	0.854998	Esophagus	57.2394	1.49226	7.89672	14.3473	8.5154	6.54417	11.0031
chr10	113909624	113975135	-	ENSG00000119927.9	GPAM	0.938946	Liver	2.23879	6.27246	4.56643	3.93678	81.809	8.301	4.65325
chr10	115310596	115349361	+	ENSG00000148702.10	HABP2	0.997728	Liver	0.0063635	0.231878	0.098335	1.11861	109.671	0.028807	0.011133
chr10	115803806	115806667	+	ENSG00000043591.4	ADRB1	0.856077	Lung	1.03681	5.59808	10.8017	0.362322	0.453678	0.363299	1.51344
chr10	116054583	116164515	-	ENSG00000169129.10	AFAP1L2	0.917078	Thyroid	7.50489	7.85821	5.37908	9.44215	0.980319	78.0061	7.64588
chr10	116853124	117708503	+	ENSG00000107518.12	ATRNL1	0.984241	Brain	1.02193	31.8849	0.077181	0.442041	0.664501	0.29621	0.512967
chr10	118430703	118502085	-	ENSG00000165868.8	HSPA12A	0.858148	Brain	1.05423	12.5843	1.03348	2.93587	0.366046	3.16755	2.15353
chr10	124320181	124403252	+	ENSG00000187908.11	DMBT1	0.954485	Lung	0.286861	0.328541	29.0823	1.8013	0.0505315	0.087462	5.38744
chr10	124768495	124817827	+	ENSG00000196177.8	ACADSB	0.92261	Liver	4.88018	8.16966	7.99243	7.63354	95.3206	7.21424	8.37097
chr10	128113566	128359079	-	ENSG00000154493.13	C10orf90	0.99571	Brain	0.104591	10.946	0	0.027915	0.065961	0.0265865	0.056664
chr10	129676105	129691211	-	ENSG00000180745.4	CLRN3	0.930638	Intestine	0	0.058079	0.045117	0.260738	8.77043	0.0118565	21.9771
chr10	132890654	133109984	-	ENSG00000176769.9	TCERG1L	0.964761	Thyroid	0.132686	2.49227	0.033589	0.034045	0.0177485	12.9215	0.0216785
chr10	134000404	134019280	+	ENSG00000151640.8	DPYSL4	0.982205	Brain	0.0986245	11.5517	0.195982	0.37704	0.0335745	0.273012	0.255122
chr10	134598297	134599556	-	ENSG00000148826.6	NKX6-2	0.99004	Brain	0.0594205	18.4437	0	1.04275	0	0	0
chr10	134973951	135039916	+	ENSG00000171798.13	KNDC1	0.949404	Brain	0.182038	20.2816	2.2978	0.33648	0.563002	2.3999	0.377809
chr10	135138927	135150475	-	ENSG00000130643.4	CALY	0.991282	Brain	0.0877095	40.4538	0.098873	0.939566	0.0433655	0.082601	0.863864
chr10	135160650	135166187	+	ENSG00000165828.9	PRAP1	0.995083	Liver	0	0.0732295	0.084763	0.845717	83.7025	0.054194	1.41139
chr10	135168658	135171529	-	ENSG00000148803.7	FUOM	0.929651	Liver	3.80792	1.67422	9.2616	4.91881	66.8187	4.08123	4.45985
chr10	135175984	135187193	-	ENSG00000127884.4	ECHS1	0.872583	Liver	25.2753	18.1565	21.8893	30.2515	227.168	31.4755	46.6222
chr10	135333910	135374724	+	ENSG00000130649.5	CYP2E1	0.999149	Liver	2.42726	2.75721	1.32414	1.59704	1933.64	1.1563	0.605974
chr11	369796	382116	+	ENSG00000182272.7	B4GALNT4	0.969308	Brain	0.651267	19.6147	0.212383	1.23598	0.100104	0.198603	1.2137
chr11	392614	404908	+	ENSG00000184363.5	PKP3	0.891151	Esophagus	79.1353	0.160789	7.46803	7.7992	0.414533	9.38167	26.4585
chr11	787104	790123	-	ENSG00000184524.5	CEND1	0.994413	Brain	0.054921	29.2296	0.066078	0.377984	0.0354065	0.078681	0.366831
chr11	1074875	1104419	+	ENSG00000198788.7	MUC2	0.999632	Intestine	0.0009265	0	0.007516	0.231127	0.018652	0.005434	119.338
chr11	1151580	1222364	+	ENSG00000215182.6	MUC5AC	0.999559	Stomach	0.0089135	0	0.270818	227.395	0.215586	0.0187435	0.088132
chr11	1244296	1283406	+	ENSG00000117983.13	MUC5B	0.898681	Esophagus	19.0171	0.044194	0.245315	0.645047	0.173229	0.017513	10.4354
chr11	1411129	1483919	+	ENSG00000174672.11	BRSK2	0.988054	Brain	0.065422	20.5135	0.145566	0.474159	0.0362405	0.287038	0.461938
chr11	2150342	2170833	-	ENSG00000167244.13	IGF2	0.942205	Liver	7.58614	3.60655	6.74965	11.4874	119.622	7.4484	4.60291
chr11	2153768	2182439	-	ENSG00000129965.9	INS-IGF2	0.999411	Liver	0	0.122715	0	0.005603	42.5457	0.0221245	0
chr11	2465914	2870339	+	ENSG00000053918.11	KCNQ1	0.857302	Thyroid	1.28893	0.82011	8.8813	3.45147	1.22211	28.2489	8.52243
chr11	5246694	5250625	-	ENSG00000244734.2	HBB	0.857844	Lung	21.1615	87.2333	581.524	161.755	61.8284	116.775	47.2495
chr11	6452279	6463847	-	ENSG00000110169.6	HPX	0.999465	Liver	0.366101	0.369651	1.33526	1.35984	1694.81	0.868986	1.13855
chr11	9002123	9025596	-	ENSG00000175352.6	NRIP3	0.946438	Brain	0.369426	11.3597	0.634058	1.33044	0.0687815	0.660569	0.587405
chr11	17515442	17565963	-	ENSG00000006611.11	USH1C	0.912768	Intestine	0.012607	3.05417	0.033635	10.5816	0.520348	0.200399	27.5183
chr11	17756359	17804602	+	ENSG00000129159.6	KCNC1	0.996775	Brain	0.0227995	14.1044	0.00836	0.064726	0	0.040675	0.136398
chr11	18252896	18258440	-	ENSG00000148965.4	SAA4	0.9998	Liver	0.079666	0.0197565	0.035192	0.057852	160.118	0	0
chr11	18260770	18270190	-	ENSG00000134339.4	SAA2	0.966984	Liver	1.59997	0.053796	0.194504	0.326111	11.6918	0.048224	0.0934695
chr11	18287721	18291524	+	ENSG00000173432.6	SAA1	0.96498	Liver	4.96333	0	0.300517	1.24581	33.6455	0.239192	0.320682
chr11	18749475	18814268	-	ENSG00000110786.13	PTPN5	0.973777	Brain	0.234426	19.4479	1.30288	0.962228	0.008579	0.227498	0.32425
chr11	22647188	22834601	+	ENSG00000148935.6	GAS2	0.947634	Liver	0.30469	2.13868	0.471916	0.43801	14.342	0.792433	0.360422
chr11	26580580	26593780	-	ENSG00000169550.8	MUC15	0.927883	Thyroid	10.5165	0	6.27149	0.012367	0.0026415	38.8389	0.002594
chr11	30406040	30608419	-	ENSG00000066382.12	MPPED2	0.919773	Thyroid	1.63992	7.49179	0.653637	3.59356	0.567254	34.0357	2.4374
chr11	33037410	33055128	+	ENSG00000121690.5	DEPDC7	0.924514	Liver	3.46378	1.85002	0.623188	1.87696	23.0779	0.384773	2.25366
chr11	33563618	33695648	+	ENSG00000110427.10	KIAA1549L	0.99452	Brain	0.202416	19.0642	0.063937	0.129257	0.0108335	0.113516	0.106915
chr11	34642640	34682604	+	ENSG00000135373.8	EHF	0.883994	Esophagus	142.842	0.317588	11.4421	13.155	1.64368	3.20279	69.6625
chr11	35272753	35441610	-	ENSG00000110436.7	SLC1A2	0.988027	Brain	0.139871	333.859	0.743382	0.285526	22.1992	0.405849	0.208903
chr11	40135753	41481323	-	ENSG00000148948.3	LRRC4C	0.94303	Brain	0.214674	14.9842	0.604186	0.744149	0.526294	2.38429	0.64835
chr11	45261852	45307870	-	ENSG00000019505.3	SYT13	0.908215	Brain	0.074958	24.241	0.197829	2.86204	0.312935	0.630683	9.27133
chr11	45907202	45928016	+	ENSG00000121653.7	MAPK8IP1	0.954012	Brain	1.05752	62.6893	2.55025	4.31003	1.87895	4.79695	2.70408
chr11	46740730	46761056	+	ENSG00000180210.10	F2	0.999783	Liver	0	0.0301655	0.065491	0.268357	418.001	0.105344	0.0756255
chr11	47611216	47616211	-	ENSG00000172247.3	C1QTNF4	0.956236	Brain	0.178257	11.8355	0.278636	1.06244	0.122124	1.02154	0.444848
chr11	57252007	57283259	-	ENSG00000149150.4	SLC43A1	0.863791	Liver	3.05385	1.27416	6.51265	7.08247	36.0778	4.465	7.09661
chr11	57364860	57382326	+	ENSG00000149131.11	SERPING1	0.896148	Liver	37.0004	6.90545	124.429	57.6754	448.173	32.1138	21.1395
chr11	58407899	58499447	-	ENSG00000149124.6	GLYAT	0.999721	Liver	0	0.015069	0.013443	0.059679	86.4634	0.040985	0.0156825
chr11	58672871	58811000	+	ENSG00000166840.9	GLYATL1	0.999311	Liver	0.0860205	0.104459	0.016616	0.11968	108.013	0.043242	0.076288
chr11	59596741	59612974	-	ENSG00000134812.3	GIF	0.999341	Stomach	0	0	0.012544	13.239	0.026678	0	0.013116
chr11	60260251	60274903	+	ENSG00000071203.5	MS4A12	0.999943	Intestine	0	0	0	0	0	0.0226205	65.8199
chr11	60524426	60544205	+	ENSG00000166961.10	MS4A15	0.999651	Lung	0	0	30.7112	0.064365	0	0	0
chr11	60691935	60704631	+	ENSG00000006118.10	TMEM132A	0.911032	Brain	4.20599	28.9335	4.78947	2.19133	0.566937	1.68435	2.0068
chr11	60970779	60980570	+	ENSG00000229859.4	PGA3	0.998604	Stomach	0.0862265	0.140193	0.146635	387.121	1.27664	1.34114	0.25061
chr11	60989688	61018929	+	ENSG00000229183.4	PGA4	0.99776	Stomach	0.0627915	0.0543555	0.107564	188.447	1.12324	0.977302	0.207478
chr11	61008514	61018920	+	ENSG00000256713.3	PGA5	0.997659	Stomach	0.052186	0.0861555	0.066623	107.435	0.468151	0.730446	0.105172
chr11	61100682	61120767	+	ENSG00000149476.10	DAK	0.864749	Liver	5.81505	5.20552	6.30497	7.06724	52.9364	11.353	7.21227
chr11	61282785	61348620	-	ENSG00000011347.5	SYT7	0.900486	Brain	1.45339	38.5502	1.65271	1.10219	12.7517	2.2924	3.76534
chr11	61520114	61555990	+	ENSG00000124920.9	MYRF	0.858098	Brain	0.634854	44.5476	18.9583	9.21488	6.24954	0.319256	2.55167
chr11	61560452	61634826	+	ENSG00000134824.9	FADS2	0.853673	Brain	2.67345	59.1035	11.7441	8.1021	20.3521	4.4427	4.57623
chr11	62172575	62190667	+	ENSG00000149021.2	SCGB1A1	0.993479	Lung	1.62818	0	41.6169	0	0	0	0
chr11	62475130	62476673	+	ENSG00000162188.5	GNG3	0.994595	Brain	0.035479	40.2344	0.242665	0.294499	0.14439	0.192531	0.395251
chr11	62676151	62689279	-	ENSG00000168539.3	CHRM1	0.964995	Brain	0.064851	12.2599	1.73114	0.243318	0	0.0313095	0.504316
chr11	62905339	63137190	+	ENSG00000184999.7	SLC22A10	0.989933	Liver	0.0163555	1.59594	0.350709	0.047794	33.6562	0.0220995	0
chr11	62931248	62997124	-	ENSG00000196600.8	SLC22A25	0.998556	Liver	0.015439	0.069782	0.024826	0.00585	14.4665	0.009483	0
chr11	63137261	63177766	+	ENSG00000149742.5	SLC22A9	0.990902	Liver	0	0.500178	0.013791	0.024099	10.0602	0.0110715	0
chr11	64373646	64490660	-	ENSG00000110076.14	NRXN2	0.953441	Brain	0.545116	42.7361	1.12733	2.85461	0.67187	2.44829	4.29119
chr11	65554493	65564690	+	ENSG00000172818.5	OVOL1	0.870259	Esophagus	12.6261	0.0351075	0.223362	0.192218	0.0226905	2.03269	7.32268
chr11	65809423	65816651	-	ENSG00000175229.6	GAL3ST3	0.952959	Thyroid	0	2.93511	0	0	0	10.3991	0
chr11	66045661	66052772	+	ENSG00000174871.6	CNIH2	0.982863	Brain	0.262059	17.8157	0.358451	0.503375	0.079932	0.358798	0.269237
chr11	66059341	66064135	+	ENSG00000179292.4	TMEM151A	0.995842	Brain	0.012689	21.6366	0.031944	0.292507	0.0625565	0.048013	0.0921055
chr11	66615704	66725847	-	ENSG00000173599.9	PC	0.885356	Liver	3.52903	16.4105	2.63759	3.82237	54.4983	5.55491	5.53288
chr11	67182439	67193078	+	ENSG00000172508.6	CARNS1	0.982806	Brain	0.27007	58.3016	0.828236	0.962705	0.272161	3.0958	0.585754
chr11	67429633	67448671	-	ENSG00000132746.10	ALDH3B2	0.998775	Esophagus	21.5168	0	0.126296	0.019497	0	0	0.012372
chr11	67776048	67796744	+	ENSG00000006534.11	ALDH3B1	0.904962	Lung	3.17164	1.05698	33.0723	5.36795	2.30987	1.65926	5.29304
chr11	71900602	71907345	+	ENSG00000110195.7	FOLR1	0.958406	Lung	1.11206	0.106483	50.67	0.776012	0.083663	10.4695	0.0975375
chr11	73357223	73373864	+	ENSG00000021300.9	PLEKHB1	0.960187	Brain	2.00413	211.803	8.20437	12.0907	0.972043	18.2026	9.12088
chr11	74041363	74109518	-	ENSG00000165434.6	PGM2L1	0.870626	Brain	1.36574	17.5571	2.35802	1.80228	0.956152	2.83879	4.30765
chr11	75297963	75380165	-	ENSG00000171533.7	MAP6	0.851922	Brain	0.976044	17.7695	2.94983	5.02846	0.261524	3.22438	3.34732
chr11	75470557	75512579	+	ENSG00000062282.10	DGAT2	0.919673	Liver	3.72222	1.65915	1.79588	6.49314	40.9877	4.47922	1.60489
chr11	77774907	77779397	+	ENSG00000151365.2	THRSP	0.995202	Liver	0	0.074167	0.074215	0.191536	35.8833	0.590195	0.10279
chr11	82443053	82444906	-	ENSG00000182103.3	FAM181B	0.948556	Brain	0.283444	11.4628	0.136794	0.647218	0.023376	1.70133	0.745973
chr11	83166055	85338966	-	ENSG00000150672.12	DLG2	0.912676	Brain	7.98586	75.925	4.95029	8.25812	2.11128	12.9184	3.55644
chr11	87846410	87908635	-	ENSG00000123892.7	RAB38	0.905152	Esophagus	18.0303	0.118395	4.16887	1.52092	0.444726	2.80221	1.20565
chr11	88237744	88799113	-	ENSG00000168959.10	GRM5	0.999112	Brain	0.00603	16.5084	0.052469	0.007606	0.004128	0.00529	0.012457
chr11	92085262	92629618	+	ENSG00000165323.11	FAT3	0.862875	Brain	0.436001	14.2703	5.70953	4.42819	0.275962	0.151208	0.740006
chr11	105480721	105852819	+	ENSG00000152578.8	GRIA4	0.991324	Brain	0.0415905	26.5781	0.018461	0.296171	0	0.015601	1.01166
chr11	107461817	107537505	+	ENSG00000110675.8	ELMOD1	0.992621	Brain	0.067358	20.2924	0.465013	0.073341	0.022388	0.051264	0.219103
chr11	109292846	109299840	+	ENSG00000185742.6	C11orf87	0.999006	Brain	0.01592	12.7421	0.035931	0.008906	0	0.009465	0.0057585
chr11	112013974	112034840	-	ENSG00000150782.7	IL18	0.903782	Esophagus	80.1854	2.11824	14.3679	5.68725	4.64508	3.40918	16.0642
chr11	112046190	112095422	+	ENSG00000197580.7	BCO2	0.871029	Liver	4.71578	3.83413	3.38165	2.2845	26.9943	4.35377	2.31915
chr11	112831997	113149158	+	ENSG00000149294.12	NCAM1	0.922208	Brain	1.27445	70.1572	1.0633	10.8514	0.603201	13.0758	5.87801
chr11	114128509	114184007	+	ENSG00000166741.3	NNMT	0.921735	Liver	11.1429	0.700842	23.0678	11.6428	130.67	7.21118	7.59574
chr11	114392437	114430617	-	ENSG00000095110.3	NXPE1	0.999813	Intestine	0.0068735	0	0.008881	0.045342	0	0	54.4015
chr11	114441313	114466484	-	ENSG00000137634.5	NXPE4	0.999545	Intestine	0.0890315	0	0.014625	0.050523	0	0.012555	61.0225
chr11	116660083	116663136	-	ENSG00000110243.7	APOA5	0.999822	Liver	0	0	0.089513	0.04675	160.88	0.0350815	0
chr11	116700422	116703788	+	ENSG00000110245.7	APOC3	0.999897	Liver	0	0	0.06546	1.27778	2470.79	0.190595	0
chr11	116706467	116708666	-	ENSG00000118137.5	APOA1	0.999791	Liver	0.0466015	0.084215	0.856682	2.59216	4071.2	1.39358	0.129
chr11	118032666	118047388	-	ENSG00000149575.5	SCN2B	0.946559	Brain	0.464228	13.5964	1.94659	0.438309	0.008758	0.773957	0.72776
chr11	118124118	118135251	-	ENSG00000149573.4	MPZL2	0.879085	Esophagus	98.073	0.211814	24.7877	7.47443	6.6259	15.8811	16.1701
chr11	118398187	118401912	+	ENSG00000172425.6	TTC36	0.983808	Liver	0.0885665	0.345625	0.336885	0.277475	16.8466	0.402485	0.185604
chr11	118894824	118901616	-	ENSG00000137700.12	SLC37A4	0.906778	Liver	0.790231	1.18164	1.81974	1.89229	19.7582	1.82316	3.54428
chr11	119288090	119295695	-	ENSG00000154096.9	THY1	0.874314	Brain	5.91456	50.9584	4.36966	8.73712	1.16322	10.5801	7.66399
chr11	119494120	119599794	-	ENSG00000110400.6	PVRL1	0.855749	Esophagus	39.3038	18.326	2.95018	3.12168	1.22604	1.61237	6.78135
chr11	119981983	120056237	-	ENSG00000137699.12	TRIM29	0.994951	Esophagus	194.679	0.21863	1.53882	0.958532	0.839772	0.195047	2.14686
chr11	123396344	123498482	+	ENSG00000023171.10	GRAMD1B	0.877097	Brain	0.500386	21.6448	2.52845	3.55418	1.80458	6.21467	1.35905
chr11	123499895	123525952	-	ENSG00000166257.4	SCN3B	0.979377	Brain	0.372798	34.0439	0.465165	0.588139	0.033504	2.10997	0.642858
chr11	124609742	124617106	+	ENSG00000154146.8	NRGN	0.987578	Brain	1.51689	285.149	12.6277	1.97483	0.817338	3.14562	1.17005
chr11	124753587	124768396	-	ENSG00000154133.10	ROBO4	0.872307	Lung	4.43478	3.09804	40.7097	5.66343	5.00448	10.3575	2.63167
chr11	124789089	124806308	-	ENSG00000165478.6	HEPACAM	0.970735	Brain	0.102261	51.8383	0.048769	0.317864	8.31218	0.0817795	0.239572
chr11	125315646	125366213	-	ENSG00000149557.8	FEZ1	0.93913	Brain	4.317	103.942	11.1303	9.0795	4.88818	2.33114	6.21555
chr11	129245835	129322171	+	ENSG00000043039.5	BARX2	0.975709	Esophagus	45.8867	0.152455	0.177847	2.16639	0.0140315	0.19355	3.98355
chr11	130274820	130298888	-	ENSG00000134917.9	ADAMTS8	0.879602	Lung	1.54323	3.09777	16.0388	3.94856	0.04112	0.0902885	2.86525
chr11	131240373	132206716	+	ENSG00000182667.10	NTM	0.916587	Brain	3.9738	48.7122	10.4538	4.47394	0.199774	0.794648	4.48332
chr11	132284871	133402414	-	ENSG00000183715.9	OPCML	0.995592	Brain	0.166852	28.6383	0.019529	0.280554	0.0331995	0.136595	0.120771
chr11	134248398	134281812	-	ENSG00000109956.8	B3GAT1	0.979462	Brain	0.154152	65.8262	0.916764	0.452967	3.89689	2.48577	0.20494
chr12	175931	287626	+	ENSG00000120645.7	IQSEC3	0.96815	Brain	0.143379	11.687	0.956048	0.54544	0.107767	0.249311	0.231453
chr12	299243	323736	-	ENSG00000111181.8	SLC6A12	0.925833	Liver	0.0633615	3.58117	1.14033	0.256187	17.1029	2.1763	0.393433
chr12	6058040	6233936	-	ENSG00000110799.9	VWF	0.883465	Lung	25.3872	8.66834	168.136	28.1446	4.69666	32.1736	18.4922
chr12	6802958	6809966	-	ENSG00000139200.9	PIANP	0.988854	Brain	0.079604	21.4869	0.14025	0.647443	0.008178	0.158519	0.402952
chr12	7022909	7032861	+	ENSG00000111674.4	ENO2	0.921963	Brain	2.17219	49.3486	4.4953	4.8646	0.581754	5.39067	5.60166
chr12	7096351	7178336	+	ENSG00000182326.10	C1S	0.901193	Liver	35.921	2.63401	39.7181	49.8949	332.258	28.0771	40.7319
chr12	7187513	7245203	-	ENSG00000159403.11	C1R	0.897313	Liver	99.3316	7.05991	124.039	151.018	958.419	90.2324	118.825
chr12	7276280	7281538	-	ENSG00000139194.3	RBP5	0.949383	Liver	1.50288	0.313537	2.72637	1.91583	37.6422	2.82917	2.14432
chr12	8975068	9039597	+	ENSG00000166535.15	A2ML1	0.999039	Esophagus	328.984	1.75318	0.009634	0.020524	0.0021905	0.106117	0.0053615
chr12	10310902	10324737	-	ENSG00000173391.4	OLR1	0.924769	Lung	0.544814	11.8525	34.5427	1.01015	0.33892	1.60455	0.241197
chr12	12202778	12364018	+	ENSG00000121380.8	BCL2L14	0.908393	Intestine	0.399145	0.042599	0.409092	5.82181	0.355924	0.109013	12.9859
chr12	13043716	13070871	+	ENSG00000013588.5	GPRC5A	0.892135	Lung	8.25157	0.0635375	143.994	13.6583	0.250076	38.7449	32.2229
chr12	13349650	13369708	+	ENSG00000134531.5	EMP1	0.851599	Esophagus	295.226	5.16165	77.7545	57.1647	5.28998	77.6341	39.8662
chr12	13524023	13540101	-	ENSG00000180861.5	C12orf36	0.961256	Intestine	0.97677	0	0	3.90197	0.00276	0	20.9987
chr12	13693165	14133053	-	ENSG00000273079.1	GRIN2B	0.997301	Brain	0.0210985	13.4789	0.023732	0.033558	0.0048115	0.035783	0.099258
chr12	14765576	14849519	-	ENSG00000070019.3	GUCY2C	0.996558	Intestine	0.0626365	0.019734	0.021646	0.23732	0.015955	0.0324595	18.8728
chr12	16500076	16762193	+	ENSG00000008394.8	MGST1	0.90005	Liver	27.7989	25.3599	37.4774	20.1476	442.39	96.4664	58.0524
chr12	20848289	20906320	+	ENSG00000139155.4	SLCO1C1	0.947186	Brain	0.446947	10.2846	0.592289	0.606662	0.0324805	0.911044	0.669575
chr12	20963636	21243040	+	ENSG00000111700.8	SLCO1B3	0.999091	Liver	0.163326	0	0.013926	0.067953	65.2363	0.0552935	0.055246
chr12	21284136	21392180	+	ENSG00000134538.2	SLCO1B1	0.999887	Liver	0	0	0.016494	0.067494	155.689	0.0213295	0
chr12	21417534	21572528	-	ENSG00000084453.12	SLCO1A2	0.985043	Brain	0.00658	23.7576	1.78239	0.00663	0.320679	0.01306	0.0027615
chr12	21689123	21757781	-	ENSG00000111713.2	GYS2	0.98221	Liver	4.12777	0.132988	0.057184	0.061678	42.286	0.082174	0.051766
chr12	32943679	33049774	-	ENSG00000057294.9	PKP2	0.886326	Intestine	3.35416	1.24676	0.779435	9.08554	10.0266	0.39772	36.4934
chr12	40590546	40763087	+	ENSG00000188906.9	LRRK2	0.898851	Lung	12.0516	7.02618	75.6473	7.02803	5.12068	7.02445	7.65903
chr12	41086244	41466220	+	ENSG00000018236.10	CNTN1	0.950146	Brain	4.32411	75.1682	3.94615	8.10382	0.408011	1.86835	3.83405
chr12	44902058	45315631	-	ENSG00000184613.6	NELL2	0.936364	Brain	1.87317	45.4693	2.00837	1.80463	0.639778	9.38429	1.65053
chr12	47158546	47226191	-	ENSG00000139209.11	SLC38A4	0.998442	Liver	0.710341	0.0452525	0.324253	0.219175	230.424	0.269637	0.584873
chr12	48103517	48119350	-	ENSG00000111405.4	ENDOU	0.991585	Esophagus	24.1668	0.477744	0.205212	0.167494	0.038408	0.241035	0.09035
chr12	49388932	49393092	-	ENSG00000181418.7	DDN	0.999372	Brain	0.0480795	44.9253	0.024834	0.052321	0.0065515	0.019256	0.0181955
chr12	49740700	49751309	+	ENSG00000178401.10	DNAJC22	0.856738	Liver	0.0708575	0.951329	0.320928	3.31755	29.8973	10.4051	10.6333
chr12	49932940	49952091	+	ENSG00000135519.6	KCNH3	0.982868	Brain	0.0575405	19.4948	0.433132	0.177233	0.10588	1.05746	0.172646
chr12	50260679	50298000	-	ENSG00000135472.4	FAIM2	0.989728	Brain	0.70489	97.9048	0.522557	2.20349	0.0116985	0.441878	2.14967
chr12	50451331	50477394	+	ENSG00000110881.7	ASIC1	0.918251	Brain	1.07918	11.324	0.283336	2.36608	0.079867	0.243479	1.50241
chr12	50497602	50505102	+	ENSG00000167588.8	GPD1	0.918529	Liver	0.229291	3.60928	8.71412	2.09711	33.1607	0.560918	0.999096
chr12	51785101	51902980	+	ENSG00000050438.12	SLC4A8	0.945863	Brain	0.919582	23.0154	3.12493	1.3827	0.313988	0.669153	1.06559
chr12	51984050	52206648	+	ENSG00000196876.9	SCN8A	0.961569	Brain	0.285471	18.9858	0.206027	0.449353	2.10979	0.341815	0.985365
chr12	52562780	52585784	-	ENSG00000167767.9	KRT80	0.979966	Esophagus	12.4597	0.01724	0.740777	0.20164	0.24122	0.262292	0.0345435
chr12	52626304	52645970	+	ENSG00000135480.10	KRT7	0.937183	Thyroid	13.3218	0.0739	100.095	2.27751	9.15585	331.944	0.185812
chr12	52840435	52845910	-	ENSG00000185479.5	KRT6B	0.99994	Esophagus	243.349	0	0.015588	0.053473	0.013583	0.0043525	0
chr12	52862300	52867569	-	ENSG00000170465.9	KRT6C	0.999971	Esophagus	245.277	0	0.006585	0.018738	0.017434	0	0
chr12	52880958	52887041	-	ENSG00000205420.6	KRT6A	0.999973	Esophagus	1340.11	0	0.082265	0.049435	0.008808	0.0744105	0
chr12	52908359	52914471	-	ENSG00000186081.7	KRT5	0.999798	Esophagus	1014.65	0.257649	0.6199	0.085415	0.065317	0.181525	0.018506
chr12	53200333	53208335	-	ENSG00000170477.8	KRT4	0.999822	Esophagus	5117.6	0	5.42567	0.016864	0.015559	0.0183135	0
chr12	53231588	53242876	-	ENSG00000170423.8	KRT78	0.999983	Esophagus	202.727	0	0	0	0	0.02094	0
chr12	53662083	53687427	+	ENSG00000135476.7	ESPL1	0.945121	Esophagus	11.1012	0.11707	0.357531	1.04501	0.493922	0.234476	1.40735
chr12	55341802	55378530	-	ENSG00000135426.10	TESPA1	0.884454	Brain	1.89597	13.595	2.92618	1.36802	0.564892	0.82723	1.84282
chr12	56075330	56078395	+	ENSG00000170439.5	METTL7B	0.968108	Liver	0.0471835	0.811844	0.2946	1.53162	34.2783	0.456226	3.41785
chr12	56623833	56631630	+	ENSG00000139540.7	SLC39A5	0.926986	Liver	0.017252	0.108707	0.125833	0.341398	68.7379	0.129466	29.3903
chr12	56754353	56756607	-	ENSG00000175336.8	APOF	0.999901	Liver	0	0	0	0.049689	109.346	0.015239	0
chr12	56864736	56882198	-	ENSG00000135423.8	GLS2	0.962867	Liver	1.4723	6.98122	0.964425	0.350068	50.7012	1.03832	0.48965
chr12	57145945	57181574	+	ENSG00000025423.7	HSD17B6	0.973979	Liver	2.03051	3.5147	20.0784	2.16291	268.539	8.95783	5.18209
chr12	57345219	57353158	-	ENSG00000139547.6	RDH16	0.998008	Liver	0.298224	0.268653	0.174689	0.200678	102.962	0.151098	0.137122
chr12	57422301	57444982	-	ENSG00000166866.8	MYO1A	0.957945	Intestine	0.0753675	0.114786	0.307323	6.38135	0.088523	0.050135	27.8108
chr12	57828543	57844611	+	ENSG00000175189.3	INHBC	0.998177	Liver	0.019703	0.0945655	0.024442	0.038441	35.6927	0.201155	0.0120265
chr12	57846106	57853063	+	ENSG00000139269.2	INHBE	0.998681	Liver	0	0.0157435	0.011816	0.062148	17.0095	0.026975	0.017977
chr12	57943781	57980415	+	ENSG00000155980.7	KIF5A	0.9964	Brain	0.191361	159.434	0.076751	1.14703	0.008747	0.620364	1.39911
chr12	58017193	58027138	-	ENSG00000135454.9	B4GALNT1	0.95061	Brain	0.360833	14.2359	0.48799	1.22336	0.121305	0.785002	1.24019
chr12	58118980	58135940	-	ENSG00000135439.7	AGAP2	0.973469	Brain	1.31055	74.3233	3.43571	2.28348	1.07003	1.48305	2.24839
chr12	62102040	62672931	-	ENSG00000198673.6	FAM19A2	0.884946	Brain	1.16487	11.7925	1.47558	1.22711	0.663881	2.169	1.44023
chr12	65444406	65515346	-	ENSG00000156076.5	WIF1	0.948919	Lung	1.17783	9.4485	36.5271	0.496093	0.008066	0.010768	0.0537985
chr12	70760056	70828072	+	ENSG00000135643.4	KCNMB4	0.879316	Brain	0.596431	15.7439	4.80146	1.93701	0.340684	1.75767	1.96696
chr12	70910630	71031220	-	ENSG00000127329.10	PTPRB	0.886996	Lung	7.73814	6.32444	90.6517	9.15702	11.1539	16.2274	10.8634
chr12	71518865	71835678	-	ENSG00000127324.4	TSPAN8	0.946138	Intestine	1.28726	0.93238	12.096	61.817	13.5738	1.00074	280.676
chr12	75433857	75603648	-	ENSG00000166006.8	KCNC2	0.999252	Brain	0	22.5213	0	0.024054	0.02293	0	0.054084
chr12	78224685	78606790	+	ENSG00000067798.9	NAV3	0.866956	Brain	2.69441	15.6108	3.99114	1.81614	0.80943	1.55978	1.59067
chr12	79257773	79845788	+	ENSG00000067715.9	SYT1	0.991082	Brain	0.32223	129.949	0.414384	2.05557	0.590493	0.384223	3.18641
chr12	81652045	82153332	-	ENSG00000139220.12	PPFIA2	0.98366	Brain	0.528227	30.3966	0.626234	0.5065	0.0683145	0.368402	0.882439
chr12	85253492	85307394	-	ENSG00000072041.12	SLC6A15	0.945533	Brain	2.86888	11.5768	0.048057	0.231313	0	0.25802	0.37703
chr12	86372516	87232681	-	ENSG00000182050.9	MGAT4C	0.927891	Thyroid	0.269194	6.28322	0.149638	0.340075	0.287853	18.0701	0.488122
chr12	95770984	95774672	-	ENSG00000258247.1	RP11-167N24.6	0.890364	Stomach	0.396794	0	0	10.7638	0	0	6.6838
chr12	96337071	96362370	+	ENSG00000139344.3	AMDHD1	0.992635	Liver	0.304296	0.209592	0.596663	0.339476	46.4113	0.346957	0.254055
chr12	96366440	96390143	-	ENSG00000084110.6	HAL	0.989708	Liver	0.793346	0.058258	1.46423	0.795205	64.5252	0.463316	0.410344
chr12	99120235	100378432	-	ENSG00000185046.14	ANKS1B	0.92512	Brain	4.27949	62.4404	2.40127	4.74415	0.560637	11.666	4.4016
chr12	100867486	100958191	+	ENSG00000012504.9	NR1H4	0.996231	Liver	0.051265	0.033761	0.206922	0.210584	36.788	0.0191815	0.310231
chr12	101549271	101604185	-	ENSG00000256870.2	SLC5A8	0.99479	Thyroid	0.026157	0.066839	0.137457	0	0.005049	11.6851	0.1298
chr12	102271129	102405908	+	ENSG00000136048.9	DRAM1	0.898562	Lung	3.18047	0.942607	39.2441	6.35204	2.51437	5.05814	5.83739
chr12	103230663	103352188	-	ENSG00000171759.4	PAH	0.998479	Liver	0.0148565	2.2833	0.110508	0.211109	341.852	0.445472	0.0546065
chr12	103981051	104160505	+	ENSG00000136011.10	STAB2	0.937828	Liver	0.887974	0.015044	0.758717	0.271473	10.6147	1.32711	0.6993
chr12	108523248	108644314	+	ENSG00000075035.5	WSCD2	0.908945	Thyroid	0.817394	8.08328	0.468207	3.13513	0.0159835	24.3563	0.7866
chr12	109252708	109294819	+	ENSG00000110887.3	DAO	0.99641	Liver	0	0.0813245	0.142467	0.015175	28.6531	0.013677	0.364469
chr12	109304658	109459045	-	ENSG00000166111.5	SVOP	0.994457	Brain	0	16.2104	0.001187	0.169152	0	0	0.368779
chr12	110152033	110208312	+	ENSG00000139438.5	FAM222A	0.928157	Brain	0.32175	11.3934	0.728964	1.37771	1.00589	0.436204	1.04073
chr12	110288748	110318293	-	ENSG00000139433.5	GLTP	0.876621	Esophagus	107.702	17.4197	14.8078	11.8669	3.69421	14.3433	17.5974
chr12	111471828	111788358	+	ENSG00000111249.9	CUX2	0.905418	Liver	0.0669575	6.29615	0.10316	0.080121	14.582	1.58287	0.145934
chr12	113008184	113336686	+	ENSG00000089169.10	RPH3A	0.999285	Brain	0.0087925	45.2237	0.056231	0.054251	0.009686	0.016101	0.0488705
chr12	113830250	113864106	-	ENSG00000135094.6	SDS	0.989407	Liver	0.525909	2.39788	2.53592	1.08544	147.331	0.657555	2.16127
chr12	114791736	114846247	-	ENSG00000089225.15	TBX5	0.968208	Lung	1.95368	0.008548	12.2191	0.006876	0.0038235	0.357857	0
chr12	115108059	115121969	-	ENSG00000135111.10	TBX3	0.85576	Thyroid	2.40914	1.35623	28.4495	6.17068	12.0776	64.3298	5.21063
chr12	117176096	117291436	+	ENSG00000135119.10	RNFT2	0.946454	Brain	0.268527	13.2056	0.688124	0.594134	0.171006	1.60248	0.918334
chr12	120123595	120315095	-	ENSG00000122966.9	CIT	0.90022	Brain	3.84783	24.8507	3.43306	2.47688	0.736861	1.24623	3.13668
chr12	121078355	121105127	+	ENSG00000157782.5	CABP1	0.985215	Brain	0.888329	37.2448	0.294324	0.765885	0.050241	0.451888	0.85333
chr12	122277433	122301502	-	ENSG00000158104.7	HPD	0.999594	Liver	0.187922	0.029827	0.377259	0.381773	528.209	0.15858	0.150759
chr12	125671382	126146917	+	ENSG00000139364.6	TMEM132B	0.973371	Brain	0.696854	19.8324	0.04967	0.291245	0.0222175	1.58697	0.521733
chr12	130880682	131200826	-	ENSG00000060709.9	RIMBP2	0.952367	Brain	0.546864	11.8017	0.095239	0.97007	0.063329	0.461825	1.2356
chr12	132312938	132336328	+	ENSG00000198598.2	MMP17	0.914457	Brain	0.871758	13.2426	0.787727	2.1329	0.262669	0.972369	1.76946
chr12	132680924	132905935	-	ENSG00000182870.8	GALNT9	0.935838	Brain	0	10.1553	0.030065	0.123371	0.0159645	3.50654	0.233548
chr12	133264192	133297276	+	ENSG00000176894.5	PXMP2	0.900423	Liver	5.58889	5.62127	6.16994	7.95952	81.7265	6.24144	17.2476
chr13	20761609	20767037	-	ENSG00000165474.5	GJB2	0.984924	Esophagus	239.256	0.32134	0.202936	2.14769	10.0071	1.02649	7.93592
chr13	20796110	20806534	-	ENSG00000121742.11	GJB6	0.963399	Esophagus	64.1067	11.6554	0.028241	0.012656	0	2.37852	0.0033005
chr13	21276266	21297237	+	ENSG00000172458.4	IL17D	0.914526	Brain	0.674118	13.8733	1.94003	2.23605	0.0830775	1.49983	0.681681
chr13	25735822	25746426	-	ENSG00000165566.11	AMER2	0.999161	Brain	0.001825	50.0484	0.047788	0.10654	0	0.0257355	0.069958
chr13	25946209	26599989	+	ENSG00000132932.12	ATP8A2	0.97436	Brain	0.0473205	11.0651	0.67359	0.433954	0.0111495	0.058091	0.478181
chr13	26618735	26625169	-	ENSG00000180730.4	SHISA2	0.945532	Thyroid	0.198199	0.769758	6.65055	0.786368	0.0307605	26.6718	0.280844
chr13	27131840	27263085	+	ENSG00000132970.8	WASF3	0.877029	Brain	2.11136	37.095	5.87525	4.18101	2.05657	10.2532	2.8923
chr13	28536274	28545276	-	ENSG00000165556.9	CDX2	0.999247	Intestine	0	0	0	0.119884	0	0	26.5353
chr13	36345478	36705443	-	ENSG00000133083.10	DCLK1	0.902506	Brain	5.72825	53.2823	3.03912	11.5747	0.198395	5.17225	5.45559
chr13	41363548	41384247	+	ENSG00000102743.10	SLC25A15	0.876901	Liver	1.89415	1.64805	2.33223	2.35887	34.9783	13.0761	4.5253
chr13	42031695	42045018	+	ENSG00000102760.12	RGCC	0.906316	Lung	7.41409	44.5343	201.525	8.28819	3.16164	43.8816	5.99826
chr13	46627321	46679211	-	ENSG00000080618.9	CPB2	0.993924	Liver	0	0.042225	8.17348	0.1132	231.298	0.103402	0
chr13	53602894	53626192	+	ENSG00000102837.6	OLFM4	0.980549	Intestine	0.054423	0.269348	0.098515	2.84681	0.142035	0.306764	31.8576
chr13	66876967	67804468	-	ENSG00000184226.10	PCDH9	0.967104	Brain	0.938234	69.6402	3.0714	2.48457	1.84235	2.834	2.57494
chr13	78109809	78219398	+	ENSG00000136155.12	SCEL	0.981388	Esophagus	300.02	0.029223	31.8862	0.05099	0.0130035	0.72997	0.79435
chr13	78272023	78338377	+	ENSG00000139737.17	SLAIN1	0.943407	Brain	2.61481	87.2319	8.01234	4.96158	2.52129	7.63851	3.87157
chr13	84451344	84456528	-	ENSG00000178235.6	SLITRK1	0.998906	Brain	0	14.6349	0.00298	0.032482	0.0054795	0.011763	0.0433685
chr13	88324870	88331871	+	ENSG00000165300.6	SLITRK5	0.924678	Brain	0.354422	10.62	0.252806	1.76896	0.016191	1.87505	0.532044
chr13	96085858	96232013	+	ENSG00000134873.5	CLDN10	0.920087	Brain	3.01399	11.1343	0.340842	0.184954	1.68027	0.0734545	0.045131
chr13	101706130	102068843	-	ENSG00000102452.11	NALCN	0.951811	Brain	0.156167	18.8131	1.84636	0.309037	0.980944	1.98173	0.165231
chr13	102104966	102375456	+	ENSG00000198542.9	ITGBL1	0.876872	Lung	4.47144	0.3067	22.1425	3.16583	4.15933	3.55031	0.704558
chr13	113760105	113774995	+	ENSG00000057593.9	F7	0.997643	Liver	0.0661905	0.360808	0.065204	0.117556	52.9626	0.102008	0.0372685
chr13	113777128	113803843	+	ENSG00000126218.7	F10	0.946373	Liver	2.74961	0.200148	4.53694	5.1295	49.281	1.81557	1.42509
chr13	113812968	113826694	+	ENSG00000126231.9	PROZ	0.998568	Liver	0	0.0306905	0.028664	0.010103	14.4571	0.021583	0.03319
chr14	21152336	21167130	+	ENSG00000214274.5	ANG	0.983235	Liver	2.41463	0.212966	3.7912	8.47866	212.221	1.12799	5.3221
chr14	21510385	21512393	+	ENSG00000165799.4	RNASE7	0.999495	Esophagus	32.826	0	0.008178	0	0.0615315	0	0.029655
chr14	23815515	23822121	-	ENSG00000092096.10	SLC22A17	0.900918	Brain	2.48486	86.738	7.04111	15.0394	1.4676	18.8185	6.71349
chr14	23846017	23848981	+	ENSG00000166091.15	CMTM5	0.981358	Brain	0.214458	18.6494	0.356984	0.72684	0.0406055	0.087244	0.659829
chr14	24037244	24048009	-	ENSG00000092051.12	JPH4	0.985184	Brain	0.166199	48.3266	2.36411	0.672612	0.210448	0.195279	0.687438
chr14	24540046	24547309	+	ENSG00000100884.5	CPNE6	0.985273	Brain	0.322796	14.5512	0.016702	0.467722	0.037229	0.0897125	0.351649
chr14	24563262	24579807	+	ENSG00000100889.7	PCK2	0.940479	Liver	5.16459	1.90217	11.4379	7.93271	175.193	11.181	24.947
chr14	24718320	24733638	-	ENSG00000092295.7	TGM1	0.992982	Esophagus	88.271	0.529073	1.35668	0.205162	0.270012	0.985942	0.37024
chr14	24774302	24780636	-	ENSG00000136305.7	CIDEB	0.875835	Liver	6.76176	0.55081	4.66262	3.47137	30.0723	3.74548	3.21148
chr14	26912299	27066960	-	ENSG00000139910.15	NOVA1	0.903156	Brain	2.00579	30.8377	1.72224	6.55213	0.303818	2.22581	5.10891
chr14	29235050	29238870	+	ENSG00000176165.7	FOXG1	0.998654	Brain	0.147763	23.8752	0.006176	0	0	0.038928	0
chr14	32798479	33300567	+	ENSG00000151320.6	AKAP6	0.857614	Brain	5.69059	46.2048	5.62619	11.2275	1.84082	5.57127	9.51723
chr14	33404139	34273382	+	ENSG00000151322.14	NPAS3	0.91818	Brain	1.06554	19.0899	0.708749	2.353	0.196107	3.31295	1.73528
chr14	36985602	36990354	-	ENSG00000136352.13	NKX2-1	0.915953	Thyroid	0	0.0600725	53.741	0.036123	0.007313	106.775	0
chr14	37126773	37148920	+	ENSG00000198807.8	PAX9	0.993206	Esophagus	29.2495	0.015544	0.295538	0.171987	0	0.431635	0.277687
chr14	38723308	38725574	-	ENSG00000176435.6	CLEC14A	0.901697	Lung	6.03347	2.01391	48.2256	5.57081	3.24089	7.86318	3.72204
chr14	50043390	50065408	-	ENSG00000213741.4	RPS29	0.901282	Esophagus	613.098	41.4486	54.0082	93.2768	66.4917	54.5261	53.3898
chr14	50999227	51099786	+	ENSG00000198513.7	ATL1	0.860873	Brain	2.94773	24.1909	4.1632	4.5424	0.361218	2.31581	5.86336
chr14	51441980	51562779	-	ENSG00000100505.9	TRIM9	0.983218	Brain	0.353465	58.1476	0.393212	1.23228	0.178541	0.346597	3.35077
chr14	53106634	53162618	-	ENSG00000197930.8	ERO1L	0.928001	Esophagus	178.871	9.83645	13.5473	15.3468	12.2131	11.5919	14.7352
chr14	58466453	58764857	-	ENSG00000139971.11	C14orf37	0.856871	Brain	1.5299	11.9497	1.5665	1.91041	0.575936	3.04476	1.6346
chr14	60062694	60337684	-	ENSG00000139970.12	RTN1	0.966373	Brain	1.26767	90.7339	5.93346	2.83533	0.811636	4.01505	3.44376
chr14	64854749	64926722	+	ENSG00000100714.11	MTHFD1	0.882785	Liver	16.1885	13.7996	12.22	12.676	120.005	14.7869	14.727
chr14	70242134	70264006	-	ENSG00000100652.4	SLC10A1	0.999619	Liver	0	0.0159295	0.032062	0.047355	73.0029	0.027808	0.0438085
chr14	70320848	70499083	+	ENSG00000198732.6	SMOC1	0.889535	Liver	0.307187	12.086	0.52839	1.43946	25.7857	1.6335	1.09593
chr14	71108504	71142077	+	ENSG00000133985.2	TTC9	0.910943	Esophagus	22.3667	3.93934	2.44694	0.911494	0.514396	3.57252	0.566781
chr14	74523553	74551196	-	ENSG00000119711.8	ALDH6A1	0.870754	Liver	6.35037	26.4496	10.8713	9.98229	100.041	13.6571	10.2689
chr14	75370657	75390099	-	ENSG00000198208.7	RPS6KL1	0.860435	Brain	0.984981	10.494	0.912528	2.02653	0.607513	1.90901	2.34707
chr14	75408537	75422487	-	ENSG00000119630.9	PGF	0.957542	Thyroid	2.12451	0.933078	1.6171	1.54706	1.17662	35.3471	1.60621
chr14	77597613	77609077	-	ENSG00000177108.5	ZDHHC22	0.996812	Brain	0	14.9332	0.022659	0.073905	0	0.009884	0.179152
chr14	80663873	80854100	-	ENSG00000211448.7	DIO2	0.959052	Thyroid	24.5675	12.0616	0.318938	4.81737	0.0316935	172.908	0.684215
chr14	81421333	81612646	+	ENSG00000165409.11	TSHR	0.999292	Thyroid	0.067995	0.086463	0.082003	0.123011	0.0936265	164.333	0.2453
chr14	93799565	94174222	+	ENSG00000133958.9	UNC79	0.989255	Brain	0.0756985	10.5718	0.097862	0.128397	0.049817	0.135431	0.194372
chr14	94749650	94759608	-	ENSG00000140093.5	SERPINA10	0.99969	Liver	0	0	0.040499	0.056393	86.1494	0.0059165	0.057622
chr14	94770585	94789731	-	ENSG00000170099.5	SERPINA6	0.999385	Liver	0	0	0.063397	0.061565	131.567	0.0164425	0.344253
chr14	94843084	94857030	-	ENSG00000197249.8	SERPINA1	0.991953	Liver	3.98145	1.54735	108.45	31.0722	3875.89	17.3177	24.7778
chr14	94908801	94919127	-	ENSG00000186910.3	SERPINA11	0.999688	Liver	0.102709	0	0	0.029938	84.6604	0.0203945	0.005419
chr14	95027428	95036250	+	ENSG00000100665.7	SERPINA4	0.999514	Liver	0	0	0.009371	0.321947	117.62	0.0118305	0
chr14	95027779	95059457	+	ENSG00000188488.9	SERPINA5	0.997131	Liver	0.126931	0.063772	0.154033	0.879698	159.409	0.804171	0.715793
chr14	95058395	95090983	+	ENSG00000273259.1	RP11-986E7.7	0.997201	Liver	0.0154415	0.0816055	0.185452	0.190458	35.9582	0.050327	0.0804985
chr14	95078714	95090392	+	ENSG00000196136.12	SERPINA3	0.989894	Liver	4.93129	3.09022	9.20209	15.4955	649.602	1.8514	4.81969
chr14	100150641	100193638	+	ENSG00000036530.4	CYP46A1	0.972848	Brain	0.297674	15.7723	0.480522	0.498646	0.286144	0.747224	0.259268
chr14	100757448	100772884	-	ENSG00000197119.8	SLC25A29	0.945291	Thyroid	15.8549	26.3497	29.6302	12.0522	10.2743	320.451	11.0286
chr14	100789674	100796715	+	ENSG00000140107.10	SLC25A47	0.999743	Liver	0	0	0.044949	0.070192	137.403	0.05229	0.044599
chr14	103388993	103399933	+	ENSG00000166126.6	AMN	0.908858	Intestine	2.00339	0.0950445	1.20791	2.14971	9.6763	0.96154	29.43
chr14	103566481	103576896	+	ENSG00000205436.3	EXOC3L4	0.924434	Liver	0.736858	0.022112	1.92093	2.86671	20.6982	0.343919	3.49389
chr14	104552016	104579098	+	ENSG00000166183.11	ASPG	0.920767	Liver	13.1058	0.0831185	0.785845	0.428851	39.9864	1.40524	3.20056
chr14	104941015	105071984	-	ENSG00000258986.2	TMEM179	0.975376	Brain	0	12.1024	0.024065	0.571981	0.0569045	0.0331455	1.10197
chr15	26788693	27184686	-	ENSG00000166206.9	GABRB3	0.939496	Brain	0.642118	26.7883	0.572447	1.21486	1.6345	4.75639	0.90444
chr15	27111510	27194354	+	ENSG00000186297.7	GABRA5	0.993121	Brain	0.203042	10.4217	0	0.13084	0.0452595	0.045907	0.005105
chr15	29129629	29410518	+	ENSG00000034053.10	APBA2	0.955527	Brain	2.34755	39.8253	2.83837	1.04859	0.949192	2.34318	1.10005
chr15	31775329	32162992	-	ENSG00000169918.5	OTUD7A	0.92262	Brain	0.533059	12.191	1.01675	1.31085	0.230449	1.30998	1.25897
chr15	32933877	32989299	+	ENSG00000166922.4	SCG5	0.93922	Brain	0.403889	42.1964	0.204088	1.69247	7.44869	2.60758	3.03145
chr15	41107650	41120907	-	ENSG00000166143.5	PPP1R14D	0.981836	Intestine	0	0	0.086349	1.58309	0	0.21481	17.2896
chr15	41164412	41166487	-	ENSG00000104140.6	RHOV	0.985555	Esophagus	26.3226	0.394147	0.338226	0.214289	0.0702525	0.264898	0.999639
chr15	41221538	41231237	+	ENSG00000128917.5	DLL4	0.850487	Lung	2.29906	1.03028	17.991	3.08296	1.73899	4.1669	3.82108
chr15	41849873	41871536	+	ENSG00000092445.7	TYRO3	0.909002	Brain	5.68841	32.766	4.44668	3.38751	1.06076	1.25749	2.04887
chr15	43803156	43823818	+	ENSG00000166963.8	MAP1A	0.96168	Brain	3.356	127.072	2.34149	10.8409	0.218543	3.76856	8.69102
chr15	44162962	44487450	-	ENSG00000171877.15	FRMD5	0.97125	Brain	0.124288	10.5178	0.083332	0.621189	0.0072665	0.21669	0.761524
chr15	45384848	45406542	-	ENSG00000140279.8	DUOX2	0.900293	Thyroid	3.97247	0.0271965	0.992545	8.17786	0.165927	43.3253	12.5831
chr15	45406519	45410619	+	ENSG00000140274.9	DUOXA2	0.926413	Thyroid	1.36867	0	0.159561	2.13008	0.033825	12.3143	1.74488
chr15	45544428	45568149	+	ENSG00000137860.7	SLC28A2	0.927292	Intestine	0	0.0236965	0.004993	5.81222	0.146961	0.029129	13.7925
chr15	45653322	45694525	-	ENSG00000171766.11	GATM	0.960271	Liver	9.2606	41.6887	4.82087	18.2937	414.598	15.1805	9.58418
chr15	50474393	50528592	+	ENSG00000140284.6	SLC27A2	0.965998	Liver	1.36538	0.532853	0.736684	1.33591	66.9515	1.72828	7.95962
chr15	51633826	51700210	+	ENSG00000186417.9	GLDN	0.850457	Brain	1.0081	18.8196	7.33358	1.23088	0.182791	0.696265	6.43443
chr15	51973550	52013223	+	ENSG00000104112.4	SCG3	0.994183	Brain	0.110225	43.9109	0.069761	0.491199	0.014111	0.134072	0.713329
chr15	52043758	52108565	+	ENSG00000128872.5	TMOD2	0.916145	Brain	4.69726	66.8578	6.25218	7.91153	0.958087	4.36631	9.45292
chr15	52599480	52821247	-	ENSG00000197535.10	MYO5A	0.851284	Brain	6.61985	40.7181	7.69375	6.88544	1.70389	6.46052	6.96927
chr15	53049637	53083273	-	ENSG00000169856.7	ONECUT1	0.995921	Liver	0.008755	0.267699	0.011496	0.051736	16.2722	0.015307	0.0432285
chr15	53805938	54055075	-	ENSG00000166415.10	WDR72	0.925433	Thyroid	0.948524	0.004458	0.364509	0.044701	14.0679	34.7838	0.132245
chr15	54305101	54920806	+	ENSG00000137766.12	UNC13C	0.952727	Brain	0.0813595	13.495	0.05728	0.59459	0.0052805	2.85599	0.233191
chr15	55903744	56035288	-	ENSG00000166450.8	PRTG	0.92616	Thyroid	0.325101	1.24377	2.99753	0.949613	0.183319	14.4777	0.714826
chr15	57884139	57977562	+	ENSG00000263155.1	MYZAP	0.963752	Esophagus	17.0907	0.0459495	0.699107	1.98086	0.238871	0.326365	0.425862
chr15	58430368	58478110	+	ENSG00000103569.5	AQP9	0.987563	Liver	0.303322	0.494888	6.98493	3.06622	155.682	0.492496	0.275082
chr15	58702768	58861151	+	ENSG00000166035.6	LIPC	0.993815	Liver	0.188521	0.29439	0.29803	0.225314	50.1233	0.503704	0.349981
chr15	59664892	59815748	+	ENSG00000157470.7	FAM81A	0.901049	Brain	0.635679	10.7617	0.712454	0.832378	0.17982	1.87563	2.1533
chr15	59887074	59932438	+	ENSG00000140297.8	GCNT3	0.937293	Intestine	2.28094	0	0.139365	17.2875	0.16599	0.806057	54.9641
chr15	65032091	65067786	-	ENSG00000166831.4	RBPMS2	0.875038	Stomach	5.3643	0.645997	1.55111	27.9189	1.51661	2.5122	9.34256
chr15	66994566	67074338	+	ENSG00000137834.10	SMAD6	0.858376	Lung	1.98939	1.43752	45.9567	4.79164	7.98745	17.5283	5.31703
chr15	68871308	69020145	+	ENSG00000103647.8	CORO2B	0.933912	Brain	0.538595	26.8647	3.85357	1.8866	0.381578	2.81568	1.17656
chr15	72452148	72490126	-	ENSG00000175318.7	GRAMD2	0.922504	Lung	0.957113	0.856045	15.611	0.243205	0.0149405	4.75614	0.431307
chr15	74032141	74045088	-	ENSG00000205363.4	C15orf59	0.909857	Brain	1.95365	20.2944	2.93309	3.57944	0.172279	0.963583	1.37431
chr15	75041185	75048543	+	ENSG00000140505.6	CYP1A2	0.998963	Liver	0	0	0.186336	0.032876	147.62	0.699009	0
chr15	75249560	75313837	+	ENSG00000198794.7	SCAMP5	0.958823	Brain	0.974177	74.0392	1.76063	3.56712	2.10264	5.34005	4.5475
chr15	77905369	78113242	-	ENSG00000169783.8	LINGO1	0.98623	Brain	0.459479	41.214	0.284746	0.559847	0.275896	1.04359	0.781569
chr15	78459810	78538030	-	ENSG00000103740.5	ACSBG1	0.972943	Brain	0.111654	14.0751	0.420581	0.541657	0.0371765	0.0997915	1.07413
chr15	78632666	78640572	+	ENSG00000166426.7	CRABP1	0.982541	Thyroid	0.08323	1.00849	0.042609	2.23041	0	42.9069	1.12995
chr15	79252289	79383115	-	ENSG00000058335.11	RASGRF1	0.873351	Brain	0.317711	15.17	10.6614	0.186993	0.0406255	0.105025	0.215771
chr15	80125927	80189721	-	ENSG00000136371.5	MTHFS	0.860831	Liver	6.11014	2.71987	7.89948	5.64183	43.9713	8.85166	5.49374
chr15	80253231	80263788	-	ENSG00000140379.7	BCL2A1	0.864273	Lung	1.65461	0.212999	12.0954	4.36124	0.927382	0.987281	1.70656
chr15	80444832	80479288	+	ENSG00000103876.7	FAH	0.923958	Liver	4.81357	2.91799	5.4027	3.85102	60.8227	6.03381	4.73144
chr15	80696692	80890278	+	ENSG00000172379.14	ARNT2	0.939691	Brain	1.10762	60.3288	6.01013	3.41644	0.492524	7.00092	3.80268
chr15	83211951	83317612	-	ENSG00000214575.5	CPEB1	0.871335	Brain	1.18315	11.5849	1.59314	2.63076	0.067327	1.08297	2.38607
chr15	83328033	83378666	-	ENSG00000103723.8	AP3B2	0.97657	Brain	0.513363	21.3358	0.140466	0.459588	0.0196415	1.28858	0.577778
chr15	84115980	84287495	+	ENSG00000140600.12	SH3GL3	0.972009	Brain	2.48828	25.3143	1.59615	0.08182	0	0.009779	0.0754215
chr15	85427885	85518876	+	ENSG00000156222.7	SLC28A1	0.998205	Liver	0.0119585	0.036563	0.018299	0.070868	16.8089	0.016802	0.0265215
chr15	88418230	88799999	-	ENSG00000140538.12	NTRK3	0.944042	Brain	0.993598	25.8308	3.27659	1.54502	0.306914	1.25967	1.29083
chr15	89998680	90039844	-	ENSG00000140519.8	RHCG	0.999638	Esophagus	705.952	1.22928	0.091683	0.035614	0.076589	0.009091	0.0928815
chr15	90328120	90358633	-	ENSG00000166825.9	ANPEP	0.91683	Liver	3.22024	0.439763	10.2283	7.67522	76.9068	2.69618	14.1185
chr15	91643180	91844539	+	ENSG00000185518.7	SV2B	0.987343	Brain	0.376902	50.5529	0.983069	0.543442	0.210428	0.522614	1.20271
chr15	100940600	101085200	-	ENSG00000154227.9	CERS3	0.995524	Esophagus	24.8013	0.41704	0.061873	0.029753	0.0163525	0.114263	0.026742
chr15	101840818	102065405	-	ENSG00000140479.12	PCSK6	0.877878	Liver	3.89631	19.5572	3.93496	5.58717	63.9224	1.70697	12.1555
chr16	318726	333003	+	ENSG00000242173.4	ARHGDIG	0.981397	Brain	0.317653	36.1411	0.251037	1.79779	0.021272	0.197331	1.44891
chr16	742500	755829	-	ENSG00000127585.7	FBXL16	0.98346	Brain	2.86814	106.312	0.993203	0.524112	0.129883	5.32954	0.705621
chr16	810762	818865	+	ENSG00000102854.10	MSLN	0.985542	Lung	0.608732	0.174743	30.2807	0.679264	0.023338	0.0193425	1.12146
chr16	1031808	1036979	+	ENSG00000005513.9	SOX8	0.979832	Brain	0.258547	24.4978	0.209943	0.824026	0.0769385	0.481715	1.11328
chr16	1383602	1399439	+	ENSG00000007516.9	BAIAP3	0.875464	Brain	0.927612	13.3694	2.58165	0.854943	2.76024	0.863526	2.0019
chr16	1840414	1844972	-	ENSG00000099769.5	IGFALS	0.98303	Liver	0.031521	0.320432	1.2118	0.435617	30.7344	0.782922	0.3471
chr16	2039661	2044276	+	ENSG00000127561.10	SYNGR3	0.974595	Brain	0.222217	21.6705	0.197097	0.905974	0.114759	0.202873	1.66029
chr16	2059927	2070756	+	ENSG00000183971.5	NPW	0.98443	Liver	0.12036	0.345663	0.202125	0.388833	18.8356	0.360488	0.342179
chr16	2227184	2246526	-	ENSG00000167971.14	CASKIN1	0.994244	Brain	0.095718	23.0281	0.048649	0.110662	0.0199385	0.370737	0.149535
chr16	2325882	2390747	-	ENSG00000167972.9	ABCA3	0.891984	Lung	1.55794	18.6124	62.6507	3.64615	0.519297	13.426	2.84171
chr16	2762419	2770552	-	ENSG00000172382.5	PRSS27	0.994434	Esophagus	75.6167	0.71589	0.487909	0.337524	0.11138	0.537463	0.33534
chr16	2902728	2908171	-	ENSG00000005001.5	PRSS22	0.908139	Esophagus	18.4428	0	3.24819	1.38796	0.641002	3.61598	1.27189
chr16	3019246	3023490	+	ENSG00000162073.9	PAQR4	0.900298	Brain	1.27655	18.3305	3.13198	1.70939	0.910042	1.41264	2.52488
chr16	4932508	5010742	-	ENSG00000118898.11	PPL	0.977022	Esophagus	398.524	1.97461	20.1537	6.29518	4.66409	17.626	4.23035
chr16	5008318	5069159	+	ENSG00000103184.7	SEC14L5	0.973544	Brain	0.310854	10.0818	0.223408	0.383437	0.0489825	0.143896	0.489799
chr16	5094123	5116111	-	ENSG00000153446.11	C16orf89	0.88953	Thyroid	2.46227	2.41291	31.3465	9.15157	0.140825	71.6777	1.99531
chr16	6069095	7763340	+	ENSG00000078328.15	RBFOX1	0.997668	Brain	0.0075275	50.5646	0.034412	0.028516	0	0.0645715	0.572411
chr16	8768422	8878432	+	ENSG00000183044.7	ABAT	0.853811	Liver	4.56527	51.5117	3.76625	3.97135	103.783	21.7182	5.499
chr16	9852376	10276611	-	ENSG00000183454.9	GRIN2A	0.966995	Brain	0.786338	22.6667	0.232964	2.49489	0.009855	0.580365	0.384299
chr16	10622279	10674555	-	ENSG00000213853.5	EMP2	0.910879	Lung	32.2538	1.84564	198.727	19.5547	18.8454	10.4478	23.3175
chr16	15797029	15950890	-	ENSG00000133392.12	MYH11	0.860067	Stomach	428.654	1.43384	67.536	1654.85	2.81289	12.8593	876.12
chr16	16242785	16317379	-	ENSG00000091262.10	ABCC6	0.930244	Liver	0.150172	0.321072	6.20033	2.43075	35.2196	2.77632	2.86195
chr16	19868616	19897489	-	ENSG00000167191.7	GPRC5B	0.947932	Brain	5.20083	115.604	6.10466	7.6377	2.22469	11.445	3.50269
chr16	20420856	20452658	+	ENSG00000183549.6	ACSM5	0.973495	Liver	0.515657	1.82036	1.2383	1.01395	48.6648	2.16992	0.981103
chr16	20462783	20498991	+	ENSG00000183747.7	ACSM2A	0.999787	Liver	0.012246	0	0.038983	0.091801	187.608	0.0833685	0.0135865
chr16	20547548	20587749	-	ENSG00000066813.10	ACSM2B	0.999612	Liver	0.0128835	0	0.071211	0.136717	159.694	0.139578	0.01105
chr16	20621565	20808903	+	ENSG00000005187.7	ACSM3	0.902195	Liver	1.59971	0.112852	2.9173	1.90409	23.3379	1.16693	5.99451
chr16	21244986	21263750	+	ENSG00000175311.5	ANKS4B	0.86416	Intestine	0	0.01252	0.007891	2.88149	8.02866	0	13.4111
chr16	21250195	21314404	-	ENSG00000103316.6	CRYM	0.927356	Brain	2.73677	23.7695	1.5153	0.37908	3.10289	0.0992865	2.52693
chr16	23701647	23724821	-	ENSG00000134398.8	ERN2	0.931938	Intestine	0.273444	0.01936	0.223265	11.3328	0.03123	0.008135	29.1111
chr16	23765948	23770272	+	ENSG00000166869.2	CHP2	0.999281	Intestine	0.0485195	0.124236	0	0.034998	0	0	48.1354
chr16	23847322	24231932	+	ENSG00000166501.8	PRKCB	0.864613	Brain	3.34613	42.563	6.93659	11.1539	2.58422	1.14194	9.41199
chr16	24857162	24922949	+	ENSG00000158865.8	SLC5A11	0.995503	Brain	0.0118915	11.8549	0.056483	0.057948	0.09469	0.0203195	0.07853
chr16	25227052	25240261	+	ENSG00000103375.6	AQP8	0.999353	Intestine	0.019353	0.085527	0.038505	0.030383	0.0302995	0	52.6067
chr16	27214807	27233089	+	ENSG00000155666.7	KDM8	0.850266	Liver	1.54978	2.50853	3.16332	2.72413	17.9372	3.61489	2.55426
chr16	28616903	28634946	-	ENSG00000196502.7	SULT1A1	0.852509	Liver	3.09892	5.39847	17.6457	5.6002	59.0502	11.4633	9.04954
chr16	29674300	29682187	+	ENSG00000197471.7	SPN	0.870752	Lung	2.26118	0.704943	16.4071	2.93096	1.66857	1.84205	3.3158
chr16	29674600	29710020	+	ENSG00000103485.13	QPRT	0.89454	Liver	2.47614	3.67839	4.8503	3.58524	38.4339	1.86425	7.86507
chr16	29789561	29793096	+	ENSG00000174992.6	ZG16	0.982177	Intestine	0	0	0	0.11335	6.34239	0	60.3686
chr16	29823177	29827201	+	ENSG00000167371.12	PRRT2	0.922114	Brain	1.31093	22.7185	1.75173	3.6458	0.361855	1.59666	1.94968
chr16	29882480	29910868	-	ENSG00000174938.10	SEZ6L2	0.945725	Brain	0.54572	26.4633	2.30838	2.5547	0.372147	0.498226	2.33869
chr16	29911696	29931185	+	ENSG00000174939.6	ASPHD1	0.983811	Brain	0.082139	18.8347	0.274762	0.486975	0.374175	0.114077	0.497325
chr16	30016830	30034591	-	ENSG00000149927.13	DOC2A	0.977569	Brain	0.268854	20.3529	0.752971	0.201982	0.189093	0.198404	1.12797
chr16	31000577	31021949	-	ENSG00000099365.5	STX1B	0.985386	Brain	0.725318	44.0987	0.277304	0.742382	1.20223	0.274377	0.645196
chr16	46918290	46965209	+	ENSG00000166123.9	GPT2	0.851723	Liver	13.3366	15.7481	1.35712	4.33422	45.3669	3.02223	2.56299
chr16	54317216	54320675	-	ENSG00000177508.11	IRX3	0.90442	Lung	5.74507	0.103124	15.1953	0.30364	0.237509	2.27657	0.048243
chr16	55542910	55620582	+	ENSG00000087253.7	LPCAT2	0.87345	Thyroid	4.59966	4.75112	8.98514	5.00916	2.22941	42.1621	6.43923
chr16	55600584	55601599	+	ENSG00000256812.1	CAPNS2	0.984685	Esophagus	32.3324	0.306681	0.471109	0.194009	0.152331	1.5575	0.289324
chr16	55836763	55867249	-	ENSG00000198848.8	CES1	0.965939	Liver	5.8474	0.109308	44.8246	10.1073	339.085	1.40744	7.00132
chr16	56225302	56391356	+	ENSG00000087258.9	GNAO1	0.902632	Brain	2.6129	73.991	0.923481	19.189	6.57832	1.42489	12.4976
chr16	56622986	56625000	+	ENSG00000087250.4	MT3	0.998868	Brain	0.021127	121.695	0.02584	0.218646	0.026885	0.11047	0.423701
chr16	56642111	56643409	+	ENSG00000125148.6	MT2A	0.861996	Liver	76.2322	34.5034	18.2132	59.1539	297.552	36.1014	22.176
chr16	56700643	56701977	-	ENSG00000125144.9	MT1G	0.866048	Liver	51.2213	8.13224	0.902361	46.4902	276.305	73.7598	41.5632
chr16	56995762	57017757	+	ENSG00000087237.6	CETP	0.94573	Liver	0.129745	0.139896	1.52645	0.313199	13.8876	2.01168	0.401136
chr16	58496750	58547532	+	ENSG00000103034.10	NDRG4	0.969172	Brain	5.50536	159.272	15.2699	2.9645	0.35717	2.33581	3.02726
chr16	66400533	66438686	+	ENSG00000179776.13	CDH5	0.885901	Lung	8.72534	2.49375	83.2591	11.5407	10.875	17.3822	5.9816
chr16	66878282	66888056	+	ENSG00000168748.9	CA7	0.974283	Intestine	0	1.52774	0	0.030739	0	0.0550365	10.4569
chr16	66942025	66952887	-	ENSG00000166589.8	CDH16	0.996046	Thyroid	0.311872	0	0.069183	0.021297	0.143697	24.9094	0.044917
chr16	66995140	67009051	+	ENSG00000172828.8	CES3	0.889453	Intestine	0.705508	0.751688	0.590311	3.07581	9.82111	0.262684	22.9272
chr16	67360701	67419106	+	ENSG00000159708.13	LRRC36	0.988034	Lung	0.072792	0.210519	10.1124	0.092217	0.052599	0.136477	0.16145
chr16	67464555	67471456	+	ENSG00000176387.6	HSD11B2	0.971305	Intestine	1.39551	0.366227	2.28972	2.48564	1.15664	5.49222	76.5871
chr16	67973653	67978034	-	ENSG00000213398.3	LCAT	0.915622	Liver	2.58783	5.09741	8.98943	6.11023	71.8327	9.05953	4.52231
chr16	69152757	69154331	-	ENSG00000263203.1	CHTF8	0.979799	Esophagus	11.1129	0.166721	0.21736	0.277458	0.214258	0.254345	0.216824
chr16	71599563	71611033	-	ENSG00000198650.6	TAT	0.99978	Liver	0	0.019902	0.102268	0.244184	422.931	0.0672735	0.123659
chr16	71660064	71676017	+	ENSG00000140832.5	MARVELD3	0.89428	Intestine	1.76936	0.070424	1.17144	0.66033	2.56485	2.40285	13.6197
chr16	72088491	72094954	+	ENSG00000257017.4	HP	0.999737	Liver	0.092818	0.141596	11.0636	3.43086	9843.75	0.5296	0.289035
chr16	72088522	72111145	+	ENSG00000261701.2	HPR	0.998916	Liver	0.003127	2.47293	0.518215	0.276472	532.724	0.132834	0.0624135
chr16	74746853	74808729	-	ENSG00000103089.4	FA2H	0.855744	Brain	1.28169	15.5619	0.48803	6.8108	0.0720365	0.601463	4.21542
chr16	75562430	75579326	-	ENSG00000260092.1	RP11-77K12.7	0.980382	Intestine	0	0.376825	0.075054	0.716491	0	0.178786	11.445
chr16	75562433	75569145	-	ENSG00000135702.10	CHST5	0.983061	Intestine	0.037347	0.745657	0.110304	2.06524	0.0149885	0.266269	31.8769
chr16	76311176	76593135	+	ENSG00000152910.14	CNTNAP4	0.999064	Brain	0	22.4371	0.003874	0.027536	0.0069875	0.0050765	0.0825475
chr16	82068609	82132139	+	ENSG00000086696.6	HSD17B2	0.906102	Liver	1.68235	0	0.757239	9.57775	58.7056	0.011429	21.0453
chr16	83981887	83999937	+	ENSG00000140961.8	OSGIN1	0.929504	Liver	2.09759	1.20749	2.73404	4.79665	35.9607	1.79068	2.58411
chr16	84402133	84497793	+	ENSG00000064270.8	ATP2C2	0.871603	Intestine	2.2103	1.35821	10.332	4.44545	0.199892	7.04342	33.2163
chr16	85061375	85127836	+	ENSG00000135709.8	KIAA0513	0.855697	Brain	4.93416	67.1743	13.2467	15.0833	2.78416	5.15104	16.9613
chr16	87635441	87731762	+	ENSG00000154118.8	JPH3	0.992369	Brain	0.253663	30.3712	0.087585	0.489444	0.0271995	0.131958	0.400813
chr16	87921625	87970135	-	ENSG00000174990.3	CA5A	0.999171	Liver	0	0.0501175	0	0	13.4931	0.0170055	0
chr16	89262406	89268072	-	ENSG00000259803.2	SLC22A31	0.995008	Lung	0.020538	0.01549	13.0285	0.041489	0.100984	0.170206	0.041558
chr16	89987800	90005169	+	ENSG00000258947.2	TUBB3	0.956791	Brain	0.978008	44.0679	0.71668	3.56051	0.145168	0.542697	5.48185
chr16	90071273	90086536	-	ENSG00000003249.9	DBNDD1	0.860192	Brain	4.1189	13.7258	1.55629	1.18968	1.1725	2.55749	0.919018
chr17	1646130	1658562	+	ENSG00000167711.9	SERPINF2	0.997881	Liver	0.776912	0.308134	1.53945	0.68822	375.852	0.788868	0.676874
chr17	1665253	1680868	+	ENSG00000132386.6	SERPINF1	0.888911	Liver	20.5979	10.3191	34.4229	44.0097	263.776	36.5129	29.9522
chr17	3763609	3798185	-	ENSG00000004660.10	CAMKK1	0.87118	Brain	2.05231	19.2365	2.92244	2.65428	0.623348	3.77048	2.84536
chr17	4460222	4464113	-	ENSG00000167741.6	GGT6	0.870918	Intestine	9.55565	0	1.97947	5.65632	0.354204	0.155913	22.8557
chr17	4675179	4686506	+	ENSG00000142484.5	TM4SF5	0.940001	Liver	0	0	0	4.67498	21.5754	0	3.09208
chr17	4692254	4693685	+	ENSG00000182327.7	GLTPD2	0.988078	Liver	0.03096	0.458037	0.454466	0.25819	24.528	0.301432	0.251433
chr17	4851387	4860426	+	ENSG00000108515.13	ENO3	0.901651	Liver	1.7138	2.25388	4.78339	5.172	41.522	6.18488	4.39389
chr17	5675554	6027747	+	ENSG00000179314.9	WSCD1	0.861488	Brain	0.5917	10.7693	1.73067	1.33595	0.399861	0.790892	4.10105
chr17	6588032	6616886	-	ENSG00000141485.11	SLC13A5	0.995165	Liver	0.073568	2.57672	0.038417	0.027396	95.5883	0.0502175	0.006942
chr17	6899384	6914055	+	ENSG00000108839.7	ALOX12	0.993531	Esophagus	29.7161	0.200671	0.393369	0.097144	0.098564	0.193723	0.170011
chr17	6926339	6933609	+	ENSG00000161940.6	BCL6B	0.851961	Lung	2.3447	0.819779	15.7732	3.24113	1.41489	4.52982	1.65999
chr17	7004641	7019019	-	ENSG00000161944.12	ASGR2	0.998593	Liver	0.249948	0.0953725	0.353906	0.296255	159.506	0.185247	0.16544
chr17	7076750	7082883	-	ENSG00000141505.7	ASGR1	0.992945	Liver	0.384925	1.99916	0.925209	0.721436	139.699	1.63669	0.246141
chr17	7093209	7123021	-	ENSG00000132535.14	DLG4	0.931768	Brain	3.95481	70.6487	6.17031	7.55351	2.0819	4.66415	4.49833
chr17	7163222	7167302	-	ENSG00000181885.14	CLDN7	0.870801	Intestine	48.8157	0.198066	24.0141	2.99351	6.6838	39.6398	157.825
chr17	7517382	7536700	+	ENSG00000129214.10	SHBG	0.993774	Liver	0.0257855	0.283659	0.105322	0.131742	23.5055	0.280066	0.0515425
chr17	7549945	7561086	+	ENSG00000129244.4	ATP1B2	0.984443	Brain	1.31102	94.3868	1.4617	2.80982	0.754495	1.70075	0.772489
chr17	7608520	7614696	+	ENSG00000108947.4	EFNB3	0.955845	Brain	0.774369	10.3499	0.421899	0.191678	0.679077	0.317622	0.357355
chr17	8213559	8225829	+	ENSG00000198844.6	ARHGEF15	0.874526	Lung	2.17651	0.668963	18.1127	3.06813	1.31036	4.82449	1.58757
chr17	14204400	14252721	+	ENSG00000125430.4	HS3ST3B1	0.907877	Liver	2.18165	0.483799	2.29315	0.861399	15.2437	0.748068	1.85773
chr17	16344891	16395467	-	ENSG00000181350.7	FAM211A	0.856193	Intestine	0.534458	4.21138	3.05036	2.06614	0.51116	2.7495	15.209
chr17	17408877	17495022	-	ENSG00000133027.13	PEMT	0.875592	Liver	5.21077	6.86408	9.24174	5.39317	60.9333	14.1135	4.66012
chr17	18231187	18266856	-	ENSG00000176974.13	SHMT1	0.89595	Liver	22.5051	4.97847	8.54998	8.06556	125.778	24.5659	9.85809
chr17	19398698	19482347	+	ENSG00000142494.9	SLC47A1	0.931755	Liver	0.929113	1.28557	4.89855	1.38718	32.1821	3.18622	1.49102
chr17	19641297	19652256	-	ENSG00000108602.13	ALDH3A1	0.966792	Esophagus	82.2764	0.0940075	1.37272	12.4882	0.364302	0.264686	1.80941
chr17	26691290	26700110	-	ENSG00000109072.9	VTN	0.999548	Liver	0.0814305	0.263207	0.574782	0.698736	765.138	0.289131	0.166133
chr17	26900133	26904282	-	ENSG00000109107.9	ALDOC	0.96976	Brain	7.10934	211.016	4.57805	6.54224	11.8696	2.89253	5.29537
chr17	27277531	27384234	+	ENSG00000179761.7	PIPOX	0.975724	Liver	1.01246	3.64463	1.37816	3.50057	89.2331	0.874595	2.58688
chr17	27941774	27949925	-	ENSG00000167549.14	CORO6	0.890515	Thyroid	1.92378	11.1299	2.6483	2.73611	0.315315	34.3151	3.78849
chr17	28521337	28563020	-	ENSG00000108576.5	SLC6A4	0.995141	Lung	1.29045	0.023955	51.7676	0.030782	0.0236905	0.125068	0.015349
chr17	28643351	28661077	-	ENSG00000182271.8	TMIGD1	1	Intestine	0	0	0	0	0	0	22.5824
chr17	29599031	29624557	-	ENSG00000126861.4	OMG	0.97759	Brain	0.914254	30.446	2.31468	0.260293	0.227882	0.219219	0.157406
chr17	30593195	30651680	+	ENSG00000141314.8	RHBDL3	0.980859	Brain	0.208574	10.2184	0.142848	0.27454	0.020928	0.125411	0.401231
chr17	30813637	30818274	+	ENSG00000176749.4	CDK5R1	0.970956	Brain	2.40672	29.1356	0.639377	0.459693	0.294617	0.513073	0.76384
chr17	32612687	32615353	+	ENSG00000172156.3	CCL11	0.853972	Esophagus	10.7549	0	0.263736	5.37833	0.029811	0	3.75117
chr17	34303529	34308532	-	ENSG00000161573.6	CCL16	0.993086	Liver	0.165153	0	0.351264	0.116625	21.7372	0.180258	0.0885045
chr17	34323476	34329084	-	ENSG00000267596.1	CCL15	0.895897	Intestine	0	0	0.378625	0.863692	7.10186	0.0067025	13.3696
chr17	34391640	34399392	+	ENSG00000006074.4	CCL18	0.932909	Lung	2.99597	0	32.5793	3.51253	0.646144	1.82879	4.13126
chr17	34948228	34957235	+	ENSG00000108272.9	DHRS11	0.856927	Intestine	1.93293	2.29391	1.08088	1.96864	0.992966	2.26896	12.2761
chr17	36686251	36762183	-	ENSG00000017373.11	SRCIN1	0.962212	Brain	0.435294	26.2928	0.52681	0.938364	2.04416	0.489802	1.52691
chr17	37329709	37353956	-	ENSG00000067191.11	CACNB1	0.866248	Brain	1.89532	16.8775	3.97709	2.20338	0.429932	2.48078	2.55791
chr17	38632080	38657849	-	ENSG00000131746.8	TNS4	0.928565	Esophagus	19.3708	0	0.247249	0.297667	0.022747	6.87263	0.862204
chr17	39032193	39041479	-	ENSG00000171431.3	KRT20	0.939879	Intestine	0	0	0.008008	23.3495	0.019969	0.005959	64.8229
chr17	39657233	39661957	-	ENSG00000171401.10	KRT13	0.999993	Esophagus	10108	0	0.281654	0.043304	0	0.0839695	0.0138
chr17	39669995	39678781	-	ENSG00000171346.9	KRT15	0.997951	Esophagus	145.284	0	0.73478	0.211479	0.026423	0.0263745	0.786898
chr17	39738531	39743173	-	ENSG00000186847.5	KRT14	0.999789	Esophagus	77.8155	0	0.031294	0.022001	0.0147555	0.0184445	0.0117995
chr17	39766030	39772151	-	ENSG00000186832.4	KRT16	0.999922	Esophagus	209.273	0	0.019469	0.064684	0	0.0144075	0
chr17	39775689	39781094	-	ENSG00000128422.11	KRT17	0.992131	Esophagus	40.582	0	1.35181	0.259371	0.019082	0.148827	0.136959
chr17	39775692	39943183	-	ENSG00000173801.12	JUP	0.868114	Esophagus	93.3903	2.99144	14.0863	8.70137	7.92955	22.569	17.6237
chr17	40118759	40129749	+	ENSG00000173786.12	CNP	0.93325	Brain	7.08118	95.6133	5.38416	8.36876	4.48471	5.96793	7.00637
chr17	40834631	40851832	+	ENSG00000108797.7	CNTNAP1	0.890446	Brain	1.69435	27.3249	2.7449	5.84831	0.561453	1.82899	5.28321
chr17	41052814	41065386	+	ENSG00000131482.5	G6PC	0.999741	Liver	0	0	0.044847	0.189417	215.839	0.0612195	0.0393075
chr17	41150290	41154976	+	ENSG00000131469.8	RPL27	0.949259	Esophagus	505.695	21.7787	23.6399	49.0951	20.1701	28.2362	11.0374
chr17	41952725	41987068	-	ENSG00000108852.10	MPP2	0.8595	Brain	0.98029	15.4783	1.03684	4.34346	0.111321	2.88087	3.69541
chr17	42385781	42396039	+	ENSG00000108309.8	RUNDC3A	0.993734	Brain	0.256036	57.7412	0.155208	0.455405	0.0295445	0.596828	0.677674
chr17	42923721	42927848	+	ENSG00000131097.2	HIGD1B	0.934877	Lung	1.59213	2.11875	14.253	0.690503	0.040988	0.857101	0.269712
chr17	42982376	42994305	-	ENSG00000131095.7	GFAP	0.99994	Brain	0.0114015	943.236	0.014232	0.060836	0.0626395	0.136063	0.0525695
chr17	43971748	44105700	+	ENSG00000186868.11	MAPT	0.972119	Brain	2.09713	57.7302	0.525493	3.12529	0.0996785	0.7435	3.06622
chr17	45331212	45421658	+	ENSG00000259207.3	ITGB3	0.919873	Thyroid	3.20757	0.392958	3.20209	7.17692	2.28952	53.1508	9.28382
chr17	46671639	46682354	-	ENSG00000108511.8	HOXB6	0.900378	Intestine	0.145783	0	1.70371	6.89258	0.219315	0.179868	15.2932
chr17	46802125	46806540	-	ENSG00000159184.7	HOXB13	0.999488	Intestine	0.0288545	0	0	0.02053	0	0	16.0798
chr17	49707674	50237377	-	ENSG00000154975.9	CA10	0.99581	Brain	0.0531045	11.5559	0.02162	0.073535	0	0.011488	0.130756
chr17	53796988	53809482	-	ENSG00000166292.7	TMEM100	0.962465	Lung	2.38724	1.96629	119.041	14.9282	1.6211	1.45464	4.45202
chr17	56597611	56618179	-	ENSG00000108387.10	SEPT4	0.93729	Brain	2.41298	103.638	13.6831	3.79327	9.78609	6.83463	2.48488
chr17	58227297	58248260	+	ENSG00000167434.5	CA4	0.899366	Intestine	0.278848	7.23282	29.5723	1.28001	0.0979645	17.4996	92.6819
chr17	59477257	59486827	+	ENSG00000121068.9	TBX2	0.933511	Lung	4.568	1.56782	75.2451	7.60902	2.87421	8.33758	5.06141
chr17	59529765	59562471	+	ENSG00000121075.5	TBX4	0.999388	Lung	0.016896	0	22.1777	0.010702	0.0020645	0.0273165	0.024516
chr17	61554422	61599205	+	ENSG00000159640.10	ACE	0.902805	Lung	4.69759	1.84542	60.7734	5.79024	1.27332	13.5302	8.30434
chr17	64208151	64252643	-	ENSG00000091583.6	APOH	0.999758	Liver	0	0	1.45122	1.69739	2470.29	0.201384	0.239798
chr17	68049570	68131749	+	ENSG00000153822.9	KCNJ16	0.984682	Thyroid	0.016791	7.22031	0.351901	1.24141	0.852638	106.359	0.0925175
chr17	72209653	72258155	+	ENSG00000141540.6	TTYH2	0.89995	Brain	1.80602	41.3003	4.76031	4.00848	1.40624	9.19222	3.61923
chr17	72838162	72857627	-	ENSG00000161509.9	GRIN2C	0.898947	Thyroid	0.077995	6.68408	0.083671	0.168671	0.020143	12.0794	0.289401
chr17	74000583	74023533	-	ENSG00000167880.3	EVPL	0.916492	Esophagus	39.8134	0.0508125	8.20934	2.20373	0.048393	5.7082	3.72805
chr17	74138534	74236454	-	ENSG00000141576.10	RNF157	0.935226	Brain	0.793114	25.6521	0.808349	3.31816	0.652316	1.01656	3.3811
chr17	74620843	74639920	-	ENSG00000070526.10	ST6GALNAC1	0.944891	Intestine	9.21436	0.924706	2.25043	12.8487	0.155027	0.272745	77.6212
chr17	74864538	74946475	+	ENSG00000167889.8	MGAT5B	0.984857	Brain	0.134144	17.4882	0.764027	0.214993	0.024855	0.306034	0.144874
chr17	76227391	76237068	+	ENSG00000204278.8	TMEM235	1	Brain	0	11.7962	0	0	0	0	0
chr17	77085427	77613550	-	ENSG00000167281.14	RBFOX3	0.879031	Brain	3.27563	21.2306	0.085266	3.73925	0	0.029883	8.27944
chr17	78440948	78451643	-	ENSG00000171246.5	NPTX1	0.910543	Brain	0.205214	43.2097	0.307209	10.7515	0.0089195	0.108361	11.8112
chr17	79091095	79139877	-	ENSG00000181409.7	AATK	0.916326	Brain	0.796303	52.9804	12.3077	5.76735	0.985322	2.48372	4.25815
chr17	79670404	79688042	+	ENSG00000183048.7	SLC25A10	0.85961	Liver	4.9033	2.14473	2.27869	4.37175	34.165	4.75383	10.3262
chr17	79762008	79771889	+	ENSG00000215644.5	GCGR	0.998583	Liver	0.032624	0.013759	0.022259	0.06155	38.6584	0.0497585	0.148748
chr17	79993012	79995608	-	ENSG00000169738.3	DCXR	0.968446	Liver	11.2254	15.3433	18.3309	10.7959	498.155	20.4772	18.1385
chr17	80787311	80798454	-	ENSG00000141579.6	ZNF750	0.986144	Esophagus	26.1056	0.022491	0.688967	0.025644	0.0135675	1.39605	0.02362
chr18	3496030	4455335	-	ENSG00000170579.10	DLGAP1	0.988294	Brain	0.830179	48.2661	1.40394	0.209784	0.107662	0.539769	0.298772
chr18	21178890	21242849	-	ENSG00000154065.12	ANKRD29	0.9022	Lung	4.47174	4.24029	33.2547	5.50181	0.990791	2.16537	2.14383
chr18	24432002	24445782	-	ENSG00000171885.9	AQP4	0.880225	Brain	0.0801685	143.178	93.2301	0.838255	0.661126	8.02599	0.059494
chr18	28569974	28622781	-	ENSG00000134762.12	DSC3	0.999109	Esophagus	64.4856	0	0.150812	0.043405	0.010541	0.061663	0.078225
chr18	28645940	28682378	-	ENSG00000134755.10	DSC2	0.938158	Esophagus	193.767	1.04173	6.19649	11.517	4.16259	4.2916	44.6878
chr18	28898052	28936992	+	ENSG00000134760.5	DSG1	0.981932	Esophagus	37.4519	0.041249	0.003226	0.004345	3.99667	0.0048495	0.0096855
chr18	29027758	29058665	+	ENSG00000134757.4	DSG3	0.999938	Esophagus	261.765	0.0144065	0.018542	0.019413	0.001201	0.0116785	0.032053
chr18	29171689	29178974	+	ENSG00000118271.5	TTR	0.999766	Liver	0.074377	0	0.140651	2.02148	2300.04	0.2695	0.723174
chr18	29202210	29265799	-	ENSG00000118276.7	B4GALT6	0.851597	Brain	1.78645	12.7348	1.88028	2.40072	0.750449	1.34386	3.17754
chr18	30252634	30353025	-	ENSG00000197705.5	KLHL14	0.98241	Thyroid	0.309278	0.248769	0.271287	0.091314	0.066601	11.4131	0.217291
chr18	31431064	31804916	-	ENSG00000101746.11	NOL4	0.936422	Brain	0.060682	14.8513	0.065728	0.11031	0.550963	4.2527	0.624923
chr18	32073254	32471808	+	ENSG00000134769.17	DTNA	0.897743	Brain	7.90268	79.6114	7.86356	7.89133	3.70043	11.231	10.2561
chr18	34823010	35146000	-	ENSG00000101489.14	CELF4	0.995736	Brain	0.008269	26.775	0.147028	0.20558	0.0119795	0.0333865	0.278768
chr18	40847843	40857615	-	ENSG00000132872.7	SYT4	0.991081	Brain	0	24.4823	0.069134	0.404546	0.0113985	0.0387455	0.786254
chr18	44259081	44339220	-	ENSG00000101638.9	ST8SIA5	0.995928	Brain	0.0303995	10.8348	0.023926	0.044577	0.009159	0.100734	0.0559475
chr18	47087069	47119272	+	ENSG00000101670.7	LIPG	0.959627	Thyroid	0.573886	0.895671	1.07018	2.16004	16.1162	100.119	3.43668
chr18	47309869	47340330	-	ENSG00000167315.13	ACAA2	0.871193	Liver	8.76983	9.29847	20.8773	21.1846	180.592	24.7468	54.6926
chr18	48324574	48351772	-	ENSG00000134042.8	MRO	0.88009	Brain	0.123818	12.4687	0.092991	0.257403	4.54186	3.81618	0.138427
chr18	52254988	52266724	+	ENSG00000178690.2	DYNAP	1	Esophagus	17.1638	0	0	0	0	0	0
chr18	55018044	55038962	+	ENSG00000177511.5	ST8SIA3	0.997487	Brain	0	16.1753	0.00191	0.063435	0.055219	0	0.123318
chr18	59000815	59223006	+	ENSG00000101542.5	CDH20	0.99469	Brain	0.191996	10.7192	0.032229	0.022837	0.0037415	0.078341	0.0123495
chr18	59992520	60058516	+	ENSG00000141655.11	TNFRSF11A	0.879944	Intestine	1.55347	1.10199	1.357	3.87399	0.701044	1.9382	14.6122
chr18	61143994	61172318	+	ENSG00000206075.9	SERPINB5	0.994253	Esophagus	100.816	0	0.083939	1.8892	0.012978	0.021816	1.46827
chr18	61254223	61271873	+	ENSG00000197641.7	SERPINB13	0.999982	Esophagus	122.906	0.0098705	0.003095	0	0	0	0
chr18	61304493	61311532	-	ENSG00000206073.6	SERPINB4	1	Esophagus	44.1762	0	0	0	0	0	0
chr18	61322431	61329197	-	ENSG00000057149.10	SERPINB3	0.999991	Esophagus	423.747	0	0.023106	0	0	0	0
chr18	61538926	61571124	+	ENSG00000197632.4	SERPINB2	0.998848	Esophagus	59.1294	0.036974	0.176482	0.146252	0.0239935	0.0226765	0.0023185
chr18	67068291	67516323	+	ENSG00000206052.6	DOK6	0.906003	Brain	0.399247	11.5009	2.87386	1.12564	0.302009	1.16579	0.619753
chr18	70203915	70305756	-	ENSG00000141668.5	CBLN2	0.988157	Brain	0	17.2702	0.004913	0.046909	0.036283	0.024734	1.11438
chr18	70409549	70535381	-	ENSG00000166342.14	NETO1	0.997918	Brain	0.048396	19.0279	0.008301	0.000255	0.011963	0.104636	0.064182
chr18	71920530	71959251	-	ENSG00000166347.14	CYB5A	0.901595	Liver	12.7631	5.32815	63.7711	26.341	236.602	9.10427	22.3898
chr18	72201675	72254448	+	ENSG00000150656.10	CNDP1	0.961276	Brain	0.0198205	38.676	0.030092	0.03974	8.77126	0.090713	0.034519
chr18	74690783	74845639	-	ENSG00000197971.10	MBP	0.989349	Brain	19.2592	1830.53	26.725	18.0823	12.2181	21.7161	18.9803
chr19	589893	617159	+	ENSG00000099822.2	HCN2	0.989397	Brain	0.944207	27.6671	0.133639	0.240371	0.061986	0.0658045	0.314123
chr19	751126	764319	+	ENSG00000099812.6	MISP	0.922027	Intestine	0.15037	0.0576505	8.14108	17.7887	0.078383	0.313582	56.7076
chr19	1397091	1401569	-	ENSG00000130005.7	GAMT	0.94861	Liver	5.6566	12.8404	2.60552	4.2758	110.038	6.85037	1.70048
chr19	1446300	1473243	+	ENSG00000115266.7	APC2	0.992072	Brain	0.01528	43.0944	0.241147	0.594126	0.136522	0.205862	0.856969
chr19	1491165	1497926	+	ENSG00000115255.6	REEP6	0.969372	Liver	3.37738	3.35409	0.703306	1.7617	71.9761	3.07673	0.953484
chr19	2714565	2721416	-	ENSG00000176490.4	DIRAS1	0.96876	Brain	2.10738	24.8139	0.226967	1.06155	0.0441325	0.205753	1.00531
chr19	3136191	3163767	+	ENSG00000060558.3	GNA15	0.905512	Esophagus	27.2772	1.28836	6.40853	3.0439	1.10416	1.48503	2.13421
chr19	3224701	3297074	+	ENSG00000161082.8	CELF5	0.995496	Brain	0.0140715	18.626	0.025926	0.095391	0.117084	0.0303825	0.220442
chr19	3474405	3480540	-	ENSG00000095932.5	C19orf77	0.913117	Stomach	0.0106685	0.519562	0.029169	45.3559	19.1774	0.04536	3.86179
chr19	3879862	3928077	+	ENSG00000167654.13	ATCAY	0.996866	Brain	0	27.8487	0.001835	0.227651	0	0.001146	0.293067
chr19	4153598	4173051	+	ENSG00000060566.9	CREB3L3	0.992846	Liver	0	0.07762	0.032373	0.552266	22.5142	0	0.304145
chr19	4304597	4323840	+	ENSG00000105255.6	FSD1	0.986804	Brain	0.115404	11.5624	0.077827	0.126361	0.206652	0.0182435	0.370945
chr19	4502204	4517716	-	ENSG00000167676.3	PLIN4	0.878023	Stomach	2.45727	0.529967	0.654255	43.5567	7.01539	0.701249	20.5194
chr19	4522543	4535236	-	ENSG00000214456.4	PLIN5	0.938752	Liver	0.815205	1.52386	1.99905	2.06955	26.0535	2.41227	0.754349
chr19	4536421	4540486	-	ENSG00000171236.9	LRG1	0.97147	Liver	2.84978	0.0677595	2.63993	2.50727	67.2548	0.248267	3.19981
chr19	4542600	4559820	-	ENSG00000167680.11	SEMA6B	0.874908	Brain	1.66893	17.5333	3.6399	2.91214	1.3864	1.51801	2.03432
chr19	5674958	5691887	+	ENSG00000130255.8	RPL36	0.867929	Esophagus	224.161	23.2494	29.7898	52.9072	24.5617	29.204	17.9185
chr19	6494330	6502859	-	ENSG00000104833.6	TUBB4A	0.997405	Brain	0.180343	161.176	0.29576	0.739217	0.195444	0.187838	0.91138
chr19	6677715	6730573	-	ENSG00000125730.12	C3	0.9678	Liver	54.5233	38.1866	146.869	94.0132	2210.65	43.4108	50.0937
chr19	7694623	7696842	+	ENSG00000229833.5	PET100	0.850827	Esophagus	26.5378	2.84283	3.8526	5.40468	3.69471	5.00986	2.94776
chr19	7741514	7744712	+	ENSG00000183019.3	C19orf59	0.997908	Lung	0.0175455	0	25.3881	0.192696	0.055582	0.0364595	0.0164495
chr19	7793843	7798792	-	ENSG00000182566.8	CLEC4G	0.989902	Liver	0.352006	0.328358	0.177176	0.391787	26.5811	0.0353355	0.325825
chr19	7828035	7834491	+	ENSG00000104938.12	CLEC4M	0.993023	Liver	0.0158575	0.00952	0.513905	0.01237	14.56	0.0085335	0.049289
chr19	7989372	7991051	-	ENSG00000178531.4	CTXN1	0.945428	Brain	1.0881	40.8383	1.8778	2.10129	0.0572935	0.905384	7.34178
chr19	8387468	8408146	-	ENSG00000186994.7	KANK3	0.866987	Lung	1.97507	2.37616	26.4066	3.88921	2.68384	7.62435	2.52589
chr19	9800600	9811452	-	ENSG00000224689.3	ZNF812	0.982443	Esophagus	16.1845	0.391664	0.547	0.15859	0.24056	0.246872	0.120188
chr19	9964394	10047228	-	ENSG00000105088.4	OLFM2	0.892599	Brain	2.32511	35.9235	3.93179	1.34568	9.09363	4.92276	1.53041
chr19	10203014	10213472	-	ENSG00000130812.6	ANGPTL6	0.968529	Liver	0.149208	0.408448	0.351503	0.703782	12.9013	0.209162	0.614027
chr19	10381511	10397291	+	ENSG00000090339.4	ICAM1	0.859297	Lung	13.1661	1.20962	74.627	16.8255	13.0664	10.0364	8.69722
chr19	10400657	10407454	+	ENSG00000105376.4	ICAM5	0.910528	Brain	0.499765	14.8111	6.51292	0.234312	0.0708715	0.448691	0.184466
chr19	11348178	11352619	+	ENSG00000130173.9	C19orf80	0.995701	Liver	0	0.081449	0.178306	0.132098	24.4354	0.169147	0.0693265
chr19	11495017	11530018	-	ENSG00000205517.8	RGL3	0.886558	Thyroid	1.04861	1.98691	7.46392	1.85116	5.86753	30.0203	2.21531
chr19	11562141	11591861	-	ENSG00000196361.5	ELAVL3	0.99809	Brain	0	30.5165	0.019348	0.113974	0	0.0065715	0.209859
chr19	11649532	11661138	+	ENSG00000130176.3	CNN1	0.865589	Stomach	83.6218	0.729898	15.1516	454.975	0.801531	3.36433	263.252
chr19	11685475	11689823	-	ENSG00000102575.6	ACP5	0.892876	Lung	11.8814	0.312436	100.097	8.84989	18.901	5.57445	18.8173
chr19	12944765	12985765	+	ENSG00000105613.5	MAST1	0.99148	Brain	0.104496	16.5652	0.048528	0.25662	0.116601	0.067149	0.253402
chr19	13317256	13734804	-	ENSG00000141837.14	CACNA1A	0.983674	Brain	0.227065	17.9526	0.063078	0.474454	0.023725	0.250733	0.719545
chr19	15579456	15609767	-	ENSG00000161031.8	PGLYRP2	0.999696	Liver	0.011813	0	0.033607	0.053187	105.139	0.0548445	0.038305
chr19	15751707	15773635	+	ENSG00000186529.10	CYP4F3	0.982632	Liver	6.01815	0.478919	0.505448	2.44702	106.38	0.143012	1.49307
chr19	15988833	16008930	-	ENSG00000186115.8	CYP4F2	0.998352	Liver	0.020563	0.065841	0.017147	0.119461	66.2756	0.0062635	0.42593
chr19	16023177	16045677	-	ENSG00000171903.12	CYP4F11	0.939151	Liver	2.87522	2.89866	0.31741	0.757048	25.3259	1.47302	0.925011
chr19	17003758	17137625	-	ENSG00000160111.8	CPAMD8	0.907325	Lung	0.591875	0.821751	20.405	0.708916	0.960951	7.47423	0.78847
chr19	17712137	17799401	-	ENSG00000130477.10	UNC13A	0.996329	Brain	0.054375	31.0642	0.06357	0.187238	0.0119805	0.110782	0.256304
chr19	17858527	17899377	+	ENSG00000130475.10	FCHO1	0.886641	Brain	1.62938	14.4723	2.45756	1.46354	1.51837	0.868989	1.90551
chr19	17905637	17923891	+	ENSG00000179913.6	B3GNT3	0.875034	Intestine	7.6121	0	0.230242	16.0492	0.841522	0.145771	33.1807
chr19	18062102	18110889	+	ENSG00000105642.11	KCNN1	0.995254	Brain	0.075359	12.1675	0.04269	0.103351	0.019128	0.046257	0.0597155
chr19	18208603	18262502	+	ENSG00000099308.6	MAST3	0.870094	Brain	3.02174	43.1527	7.8328	4.83429	5.95869	4.30373	7.68354
chr19	18307594	18314884	-	ENSG00000105649.5	RAB3A	0.979967	Brain	1.19565	71.2736	1.41176	2.68449	0.551145	1.23406	1.48979
chr19	18718240	18731849	+	ENSG00000105696.4	TMEM59L	0.992468	Brain	0.663128	64.6385	0.086468	0.830473	0.0320995	0.25833	1.05051
chr19	18979361	19006905	-	ENSG00000130283.7	GDF1	0.998336	Brain	0	29.9549	0	0.154836	0	0.104975	0.039235
chr19	19322782	19363042	+	ENSG00000130287.9	NCAN	0.999665	Brain	0	41.5898	0.004241	0.014095	0.0111845	0.024928	0.0291555
chr19	19627036	19648390	+	ENSG00000250067.7	YJEFN3	0.898161	Brain	0.602122	11.3897	1.21732	1.17985	0.598836	1.7699	1.59144
chr19	19672522	19729725	-	ENSG00000105717.9	PBX4	0.923745	Thyroid	1.68318	0.902199	1.78304	1.00533	0.422698	14.4053	0.794424
chr19	20278037	20311299	+	ENSG00000256229.3	ZNF486	0.910166	Thyroid	1.14075	0.677022	1.84438	0.881653	0.23559	11.4556	1.39517
chr19	30017406	30055386	+	ENSG00000187135.7	VSTM2B	0.998675	Brain	0	16.4842	0.015445	0.063578	0	0	0.0520715
chr19	30719197	31204445	+	ENSG00000198597.4	ZNF536	0.888963	Brain	2.87738	15.7897	0.392704	2.18216	0.021885	1.88497	3.16038
chr19	35531410	35557475	+	ENSG00000105707.9	HPN	0.98247	Liver	0.052992	1.51329	4.81099	0.523576	150.296	8.71219	0.195102
chr19	35606732	35615228	+	ENSG00000089356.12	FXYD3	0.91074	Intestine	65.5185	0.582289	45.685	45.5873	0.20591	0.220129	294.645
chr19	35634154	35645204	+	ENSG00000221946.3	FXYD7	0.993436	Brain	0.267151	29.3501	0.209605	0.18109	0.217868	0.060038	0.220174
chr19	35771619	35776046	+	ENSG00000105697.3	HAMP	0.998565	Liver	0.06486	0.587529	0.26336	0.121618	155.251	0.195769	0.103931
chr19	35783028	35804707	+	ENSG00000105695.10	MAG	0.997168	Brain	0.013288	80.5644	0.126882	0.031088	0.0212335	1.13854	0.0378755
chr19	36014269	36019253	-	ENSG00000189001.6	SBSN	0.999988	Esophagus	244.188	0.018076	0	0	0	0	0
chr19	36245469	36248980	-	ENSG00000004776.7	HSPB6	0.913401	Stomach	19.0615	3.93726	14.9583	141.008	2.81132	4.73796	27.7603
chr19	36290890	36304201	-	ENSG00000250799.5	PRODH2	0.999854	Liver	0	0	0	0.021845	45.3155	0.017828	0
chr19	36358801	36370693	+	ENSG00000105290.7	APLP1	0.994984	Brain	0.295059	152.855	0.952146	1.60266	0.094959	0.469108	1.18636
chr19	36505562	36524245	-	ENSG00000105270.10	CLIP3	0.899192	Brain	5.64722	63.9898	3.16814	19.1988	0.837808	1.59083	8.26149
chr19	38794801	38795649	+	ENSG00000167644.7	C19orf33	0.92313	Esophagus	142.271	0.105699	18.8132	21.2121	0.235435	2.75122	22.5004
chr19	39261611	39264132	-	ENSG00000205076.4	LGALS7	0.99986	Esophagus	232.047	0	0.049383	0	0	0.145305	0
chr19	39279851	39282389	+	ENSG00000178934.4	LGALS7B	0.999739	Esophagus	144.02	0	0.028663	0.05272	0	0.144279	0
chr19	39292311	39304004	-	ENSG00000171747.4	LGALS4	0.965417	Intestine	0.302179	0.245578	1.14161	58.5385	27.1324	0.940838	425.555
chr19	39687601	39692524	+	ENSG00000188505.4	NCCRP1	0.998637	Esophagus	101.132	0.0144135	0.103363	0.056827	0.024235	0.303077	0.324862
chr19	40353963	40440533	-	ENSG00000090920.9	FCGBP	0.918234	Intestine	3.24913	1.81046	2.01248	59.7079	0.808432	132.871	408.606
chr19	40697651	40721482	+	ENSG00000130758.3	MAP3K10	0.859391	Brain	2.68322	27.327	4.99336	4.95031	1.98088	4.41267	4.03412
chr19	40721965	40724306	-	ENSG00000174521.7	TTC9B	0.997426	Brain	0	15.7653	0.003645	0.041474	0	0.0077915	0.19054
chr19	40899675	40919273	-	ENSG00000105227.10	PRX	0.929657	Lung	0.672836	1.03211	24.8714	1.67534	0.459927	5.08583	1.5711
chr19	40972148	41082370	+	ENSG00000160460.11	SPTBN4	0.959726	Brain	0.622778	15.3933	0.368595	1.46732	0.144656	0.659189	0.457137
chr19	41349443	41356352	-	ENSG00000255974.2	CYP2A6	0.999602	Liver	0	0.0989245	0.440543	0.193477	343.46	0.0519505	0.0350065
chr19	41381344	41388657	-	ENSG00000198077.6	CYP2A7	0.99941	Liver	0	0.0486025	0.052251	0.032834	47.3749	0.0130785	0.021018
chr19	41497204	41524303	+	ENSG00000197408.4	CYP2B6	0.99893	Liver	0	0	0.094331	0.108694	97.2147	0.006759	0.414233
chr19	41698954	41713444	+	ENSG00000167600.9	CYP2S1	0.906206	Stomach	3.13387	0.235488	2.41497	23.3266	0.689969	0.412452	6.24062
chr19	42177235	42210895	-	ENSG00000007306.10	CEACAM7	0.99231	Intestine	7.44777	0	0.011662	0.165038	0.006816	0.0019335	165.435
chr19	42212504	42233718	+	ENSG00000105388.10	CEACAM5	0.944539	Intestine	26.467	0	0.720381	18.4875	0.032201	0.0434425	137.485
chr19	42470734	42501649	-	ENSG00000105409.11	ATP1A3	0.995279	Brain	0.0887775	55.4284	0.131439	0.544731	0.044047	0.027801	0.733236
chr19	42891171	42894439	-	ENSG00000105427.5	CNFN	0.999711	Esophagus	636.725	0.28005	0.050357	0.09122	0.0652345	0.25999	0.356724
chr19	43964939	43969812	-	ENSG00000124466.8	LYPD3	0.996288	Esophagus	150.415	0.120914	1.0686	0.79651	0.161529	0.683866	0.518649
chr19	44010871	44031396	-	ENSG00000105755.3	ETHE1	0.872475	Intestine	22.1037	3.6126	13.5406	12.9459	13.6409	7.92955	96.4169
chr19	44126520	44143991	-	ENSG00000105767.2	CADM4	0.892318	Brain	5.86168	37.2567	2.5433	7.08573	1.73109	2.62843	4.2211
chr19	45409011	45412650	+	ENSG00000130203.5	APOE	0.962739	Liver	19.8585	185.425	118.108	31.0961	1977.97	50.2851	37.4373
chr19	45417504	45422606	+	ENSG00000130208.5	APOC1	0.993097	Liver	2.21093	12.4844	61.2721	4.18921	2266.09	9.62159	4.07672
chr19	45445495	45452822	+	ENSG00000224916.4	APOC4-APOC2	0.998359	Liver	0.002015	0.107512	0.075828	0.279137	51.8786	0.0284795	0.0177945
chr19	45445495	45452820	+	ENSG00000267467.2	APOC4	0.999989	Liver	0	0	0	0.004509	68.6919	0	0
chr19	45449243	45452822	+	ENSG00000234906.4	APOC2	0.997137	Liver	0.465427	2.85098	1.75209	0.069239	317.258	0.253823	0.0583095
chr19	45882892	45909607	-	ENSG00000104881.10	PPP1R13L	0.860297	Esophagus	32.9309	1.18285	10.9675	3.94825	2.40112	6.07726	3.02629
chr19	46367247	46377055	+	ENSG00000170608.2	FOXA3	0.879159	Liver	0.0677885	0	0.137273	6.27638	21.8646	0.0610125	9.31045
chr19	46733009	46734500	+	ENSG00000188293.5	IGFL1	1	Esophagus	25.1748	0	0	0	0	0	0
chr19	46969748	46974820	-	ENSG00000182013.13	PNMAL1	0.926253	Brain	0.299391	27.8912	0.741994	1.88722	0.151438	8.27527	0.986064
chr19	46990163	46999755	-	ENSG00000204851.5	PNMAL2	0.948149	Brain	0.36323	13.8246	0.994743	1.00303	0.408127	0.842584	0.689209
chr19	47906381	47922780	-	ENSG00000105419.13	MEIS3	0.872691	Brain	2.74689	19.8902	2.7486	3.4074	0.881904	1.82593	3.5825
chr19	47931274	47975425	-	ENSG00000118160.9	SLC8A2	0.951148	Brain	0.38458	16.1232	0.041075	1.88503	0.005773	0.029277	2.38021
chr19	48373723	48389654	-	ENSG00000105398.3	SULT2A1	0.999489	Liver	0	0	0.021418	0.623979	231.873	0.031706	0.033134
chr19	48988528	49016446	-	ENSG00000142235.4	LMTK3	0.942638	Brain	1.17685	14.5772	1.39377	0.281906	0.117192	1.89283	0.154527
chr19	49055332	49102682	+	ENSG00000088002.7	SULT2B1	0.97996	Esophagus	47.1593	0.0814015	4.5604	0.214189	0.032461	0.518331	0.263661
chr19	49141199	49149569	-	ENSG00000063180.4	CA11	0.949556	Brain	2.73601	58.3539	2.51803	5.44862	0.492413	4.14634	2.32019
chr19	49622646	49654283	+	ENSG00000177380.9	PPFIA3	0.856548	Brain	3.23488	11.8518	1.65466	1.26473	0.726628	1.26778	2.05232
chr19	49932658	49945617	-	ENSG00000104888.5	SLC17A7	0.996454	Brain	0.527792	107.172	0.125487	0.561776	0.0674955	0.636021	0.361649
chr19	50194155	50216988	+	ENSG00000169169.10	CPT1C	0.932018	Brain	1.06573	13.5618	1.1565	1.22769	0.434312	0.888338	0.75923
chr19	50431959	50437192	+	ENSG00000169136.4	ATF5	0.950352	Liver	4.13531	2.55793	5.96965	7.41771	105.5	5.96043	5.3859
chr19	50861734	50869087	-	ENSG00000131400.3	NAPSA	0.998664	Lung	0.198087	0.273465	304.244	0.322619	0.268319	0.918354	0.458606
chr19	51014857	51017947	-	ENSG00000204653.5	ASPDH	0.961917	Liver	0	7.51827	0.16417	0.214993	35.6278	0.147414	0.0960225
chr19	51020149	51071302	-	ENSG00000131409.8	LRRC4B	0.956161	Brain	1.23075	33.6027	3.38295	1.52919	0.635985	0.921532	1.13835
chr19	51165084	51222707	-	ENSG00000161681.11	SHANK1	0.994693	Brain	0.146203	31.4305	0.145478	0.21264	0.0680575	0.274003	0.154363
chr19	51322404	51327043	-	ENSG00000167748.6	KLK1	0.984452	Intestine	0.700813	0	0.231553	0.556422	0	0.948438	26.1258
chr19	51461887	51472929	-	ENSG00000167755.9	KLK6	0.934148	Brain	7.24088	18.4758	0	0.059075	0	0	0
chr19	51479729	51487355	-	ENSG00000169035.7	KLK7	0.97825	Esophagus	17.7139	1.68591	0.513093	0.086703	0	0.02599	0
chr19	51499263	51505967	-	ENSG00000129455.11	KLK8	0.999861	Esophagus	21.4463	0	0.017942	0	0	0	0
chr19	51515995	51523431	-	ENSG00000129451.7	KLK10	0.978713	Esophagus	53.4937	0.108901	5.8343	0.388471	0.091768	0.181681	0.227152
chr19	51525472	51531295	-	ENSG00000167757.9	KLK11	0.97049	Esophagus	56.997	0	7.86391	1.77734	0.186722	0.052559	0.211427
chr19	51532348	51538486	-	ENSG00000186474.11	KLK12	0.998776	Esophagus	31.0642	0	0.045606	0.07539	0	0	0.107091
chr19	51559463	51568371	-	ENSG00000167759.8	KLK13	0.99974	Esophagus	220.797	0	0.200977	0.028106	0	0.0772745	0.038616
chr19	51834790	51845378	-	ENSG00000186806.5	VSIG10L	0.980542	Esophagus	36.9016	0.753792	0.907165	0.720106	0.66866	0.464772	0.793752
chr19	51874860	51875969	-	ENSG00000105374.5	NKG7	0.86703	Lung	2.68269	0.255821	26.2147	6.98903	6.13839	1.99653	2.85213
chr19	54382444	54410906	+	ENSG00000126583.6	PRKCG	0.993959	Brain	0.004107	12.2928	0.070682	0.202484	0.002962	0.0730865	0.0922295
chr19	54412589	54447195	+	ENSG00000105605.3	CACNG7	0.999252	Brain	0	16.2606	0	0.037096	0	0	0.035896
chr19	54926393	54948080	+	ENSG00000167614.9	TTYH1	0.991942	Brain	0.267898	26.4031	0.041467	0.384566	0.11916	0.053714	0.409735
chr19	54976210	54984411	-	ENSG00000167617.2	CDC42EP5	0.913874	Intestine	1.68067	0.080311	2.14039	3.65332	0.456765	0.950081	17.342
chr19	55583388	55599291	+	ENSG00000131037.10	EPS8L1	0.954511	Esophagus	60.8933	0.031176	2.48759	3.38167	0.38275	7.86116	2.47543
chr19	55682567	55691809	-	ENSG00000129990.10	SYT5	0.992373	Brain	0	11.0599	0.009911	0.236592	0.005027	0.0033105	0.251289
chr19	55793440	55823901	+	ENSG00000160469.12	BRSK1	0.974654	Brain	0.974557	46.8512	0.560046	2.75194	0.205591	0.551131	2.08164
chr19	55999771	56030465	+	ENSG00000179954.10	SSC5D	0.850918	Stomach	4.18464	0.634235	4.20724	19.8591	1.24838	1.35945	6.12995
chr19	57321445	57352096	-	ENSG00000198300.8	PEG3	0.922454	Brain	1.93447	52.4738	2.76942	6.6436	3.08615	5.82568	4.15538
chr19	58856544	58864865	-	ENSG00000121410.7	A1BG	0.998127	Liver	0.729048	1.45607	1.41303	0.780032	558.236	1.23182	0.662917
chr19	58990879	59023780	-	ENSG00000083807.5	SLC27A5	0.988159	Liver	1.62329	2.93064	2.49707	2.21219	207.04	3.59953	1.84718
chr20	1246960	1289972	+	ENSG00000101298.9	SNPH	0.88957	Brain	0.834297	24.0603	2.44564	4.12276	0.167297	4.28781	4.08412
chr20	2276647	2321724	+	ENSG00000125780.11	TGM3	0.999904	Esophagus	814.762	0.0735475	0.117737	0.033083	0.0362885	0.013927	0.194432
chr20	2774715	2781283	-	ENSG00000088882.7	CPXM1	0.919177	Thyroid	0.927378	1.62183	0.683289	1.42167	0.160952	12.084	1.04486
chr20	3143263	3154192	-	ENSG00000088899.10	LZTS3	0.885042	Brain	0.936562	28.6837	5.48934	2.99732	1.91333	6.69736	1.75056
chr20	5892076	5906007	+	ENSG00000089199.5	CHGB	0.975189	Brain	0.05455	16.8734	0.039056	0.989469	0.006832	0.26488	1.1571
chr20	6021424	6034695	-	ENSG00000125872.7	LRRN4	0.993191	Lung	0	0.111215	10.3547	0.071879	0.137711	0.071442	0.030765
chr20	7863628	7921121	-	ENSG00000101323.4	HAO1	0.999871	Liver	0	0	0	0.067125	99.5635	0.0100705	0
chr20	10199478	10288066	+	ENSG00000132639.8	SNAP25	0.994898	Brain	0.379208	341.372	1.24611	5.44077	1.07388	0.560907	1.74903
chr20	13202418	13281298	+	ENSG00000101230.5	ISM1	0.888071	Thyroid	2.39596	0.64281	1.66095	2.18107	1.1659	12.3745	0.263667
chr20	17206752	17465223	+	ENSG00000125851.5	PCSK2	0.909272	Brain	0.534551	13.6897	0.316346	2.5736	0.032218	2.49456	1.50094
chr20	23059986	23066977	-	ENSG00000125810.9	CD93	0.871193	Lung	15.0492	0.88188	84.205	16.2122	6.46592	15.5572	10.9108
chr20	23355159	23402125	-	ENSG00000125814.13	NAPB	0.921016	Brain	6.0401	72.6513	6.20068	5.00003	2.81783	7.30085	7.07034
chr20	24449835	24647252	+	ENSG00000101463.5	SYNDIG1	0.93838	Brain	0.147667	11.9692	0.360154	0.479075	0.0251805	2.93848	0.474665
chr20	31595406	31611515	+	ENSG00000078898.6	BPIFB2	0.999033	Esophagus	15.6551	0.0075735	0	0.022847	0.046608	0.013808	0
chr20	31861286	31897684	+	ENSG00000125999.6	BPIFB1	0.911557	Esophagus	29.1755	0	5.13811	10.2931	0.013004	0.038029	0
chr20	36149617	36152092	+	ENSG00000053438.7	NNAT	0.870419	Brain	0.472529	11.8861	0.501696	5.19867	0.20494	0.466795	2.39659
chr20	36531499	36573752	+	ENSG00000132821.7	VSTM2L	0.948642	Brain	0.479693	22.466	2.29339	1.28944	1.11656	0.630981	1.11281
chr20	36756863	36794980	-	ENSG00000198959.7	TGM2	0.875124	Lung	21.9682	5.09467	201.572	45.3101	46.0107	14.406	18.2389
chr20	36974759	37005665	+	ENSG00000129988.5	LBP	0.999545	Liver	0	0	0.035125	0.148638	122.899	0.096138	0.055741
chr20	40701392	41818610	-	ENSG00000196090.8	PTPRT	0.985339	Brain	0.043397	12.0816	0.550523	0.141389	0.1314	0.049373	0.1467
chr20	43343485	43357150	+	ENSG00000064205.6	WISP2	0.908335	Lung	2.71692	0.296539	21.828	3.63458	0.441143	1.74442	3.17161
chr20	43380449	43438979	-	ENSG00000101098.8	RIMS4	0.926752	Brain	0.118459	14.6828	0.627797	0.47052	0.003199	4.62925	0.60372
chr20	43803517	43805185	+	ENSG00000124102.4	PI3	0.984878	Esophagus	224.162	0.034799	0.401636	5.35046	0.06642	0	14.486
chr20	43880880	43883205	-	ENSG00000124107.5	SLPI	0.898173	Esophagus	403.885	0.320341	180.946	15.0592	29.622	4.60411	16.2073
chr20	43991840	44039250	+	ENSG00000254806.1	SYS1-DBNDD2	0.92292	Brain	0.325737	73.9718	10.1182	15.6551	0.487075	7.08073	0.54359
chr20	44650356	44688784	+	ENSG00000124140.8	SLC12A5	0.996939	Brain	0.0543785	35.3001	0.33678	0.111233	0.0422095	0.0658605	0.0379
chr20	47980414	48099184	-	ENSG00000158445.7	KCNB1	0.911471	Brain	1.05187	15.5209	0.428737	3.60923	0.436464	0.142601	2.57536
chr20	54987168	55034396	+	ENSG00000087589.12	CASS4	0.933594	Lung	0.833763	0.69008	15.1148	1.7005	1.05906	0.678076	1.06081
chr20	55204358	55214339	+	ENSG00000087510.5	TFAP2C	0.92437	Esophagus	11.3917	0.222031	1.60249	0.279046	0.03607	1.68552	1.34418
chr20	55743804	55841685	-	ENSG00000101144.8	BMP7	0.862562	Thyroid	7.57982	9.08846	1.19091	1.37618	0.0095755	24.9651	1.34193
chr20	56136136	56141513	+	ENSG00000124253.9	PCK1	0.979715	Liver	0.178044	0.218751	0.092308	3.55035	492.786	0.233416	55.7038
chr20	58152564	58422766	+	ENSG00000087495.12	PHACTR3	0.97584	Brain	0.544317	19.7391	1.5327	0.27686	0.256868	0.0323215	0.218266
chr20	61584052	61599949	+	ENSG00000101194.13	SLC17A9	0.903103	Liver	1.25181	0.395317	1.59377	3.46866	21.3203	1.02329	4.66233
chr20	61872136	61904046	-	ENSG00000101198.10	NKAIN4	0.985829	Brain	0.0096355	10.572	0.01636	0.165731	0	0.531488	0.175685
chr20	62037542	62103993	-	ENSG00000075043.13	KCNQ2	0.998858	Brain	0	34.6492	0	0.107085	0	0.003223	0.127203
chr20	62119366	62130505	-	ENSG00000101210.6	EEF1A2	0.989768	Brain	1.50128	95.9884	0.157392	2.52417	0.178983	0.0622725	1.46865
chr20	62271061	62284780	-	ENSG00000197457.5	STMN3	0.853758	Brain	3.60365	60.9964	7.03397	8.12086	0.971554	26.9731	6.8182
chr20	62366815	62370456	+	ENSG00000203896.5	LIME1	0.898243	Liver	1.5939	1.65584	2.02237	2.0435	20.4727	2.05047	3.13341
chr21	22370633	22915650	+	ENSG00000154654.10	NCAM2	0.958502	Brain	0.288502	20.1514	2.24525	0.765666	0.436991	0.293677	0.987354
chr21	31586324	31588391	-	ENSG00000156284.4	CLDN8	0.9323	Intestine	1.66548	0	0.414302	0.007561	0.0094175	6.43754	21.0102
chr21	34398153	34401504	+	ENSG00000205927.4	OLIG2	0.99925	Brain	0.000434	18.7062	0.008101	0.046953	0	0	0.028737
chr21	34442450	34444726	+	ENSG00000184221.8	OLIG1	0.998117	Brain	0.040625	39.5857	0.181227	0.124444	0.0143995	0.0207365	0.0657795
chr21	35445870	35478559	+	ENSG00000198743.5	SLC5A3	0.854305	Thyroid	5.25361	6.03924	9.36391	7.06082	5.91393	49.5182	9.65575
chr21	37507210	37518864	+	ENSG00000159231.5	CBR3	0.8986	Esophagus	17.7906	1.5634	2.1865	2.67576	0.272479	2.16367	1.96196
chr21	37832919	37948867	-	ENSG00000159261.6	CLDN14	0.997226	Liver	0.04289	0	0.022826	0.069332	10.3478	0.015837	0.021337
chr21	38071433	38122218	+	ENSG00000159263.11	SIM2	0.975198	Esophagus	17.2301	0.258256	0.016888	2.25082	0	0.026544	0.0114895
chr21	39529128	39679279	+	ENSG00000157551.13	KCNJ15	0.896785	Thyroid	4.29587	0.039298	25.8883	4.0038	1.63829	58.1489	0.145459
chr21	40928369	41045064	+	ENSG00000183778.13	B3GALT5	0.965712	Intestine	0.649868	0.60031	0.066786	2.16709	0.229103	1.38959	24.8034
chr21	41239243	41301322	+	ENSG00000183036.6	PCP4	0.853167	Esophagus	22.1661	4.33611	0	0.479557	0	12.9817	1.73086
chr21	43731777	43735761	-	ENSG00000160180.14	TFF3	0.909778	Thyroid	3.61481	0.0139715	2.99383	2.88388	0.91196	278.04	140.094
chr21	43766466	43771237	-	ENSG00000160181.4	TFF2	0.996249	Stomach	0.064143	0	0	48.5837	0.087178	0.749884	0.192356
chr21	43782391	43786703	-	ENSG00000160182.2	TFF1	0.995443	Stomach	0.594745	0	0.045316	414.261	0.418794	0.0839235	10.1849
chr21	44473301	44497053	-	ENSG00000160200.13	CBS	0.918728	Liver	0.810387	21.3186	4.63887	2.05028	91.1312	13.9304	1.68989
chr21	44589118	44592915	+	ENSG00000160202.3	CRYAA	0.999245	Liver	0	0.0570565	0	0	12.5974	0	0
chr21	45192393	45196326	-	ENSG00000160213.5	CSTB	0.996438	Esophagus	1371.82	4.99121	7.80087	5.80733	2.64183	4.66569	3.4092
chr21	46825052	46933634	+	ENSG00000182871.10	COL18A1	0.884713	Liver	18.9726	5.96838	27.5345	32.2349	207.825	36.1273	22.9187
chr21	47556176	47575481	-	ENSG00000160282.9	FTCD	0.997638	Liver	0.172642	1.99971	0.233268	0.452493	261.745	0.592149	0.259099
chr21	48018875	48025121	-	ENSG00000160307.5	S100B	0.962541	Brain	5.588	131.827	1.27529	8.39318	0.36954	1.67695	12.3259
chr22	18043139	18073760	+	ENSG00000182902.9	SLC25A18	0.879655	Liver	0.042567	20.5973	0.441945	0.185605	29.7295	0.089116	0.110268
chr22	19701987	19712295	+	ENSG00000184702.13	SEPT5	0.927212	Brain	8.4961	79.7125	5.43811	7.03695	1.00544	8.90835	3.92789
chr22	21128167	21142008	+	ENSG00000099937.6	SERPIND1	0.999111	Liver	0.053881	0.088847	0.328683	0.272523	224.926	0.408734	0.0468895
chr22	21319396	21335649	+	ENSG00000183773.11	AIFM3	0.860281	Intestine	0.492974	14.7948	0.921075	0.474317	0.433954	0.4698	20.979
chr22	23412540	23467224	+	ENSG00000128266.7	GNAZ	0.857455	Brain	1.66393	20.6391	1.50698	8.11578	0.366512	1.62294	4.37582
chr22	24313554	24322660	-	ENSG00000099977.9	DDT	0.857409	Liver	18.0624	9.94812	13.7964	18.69	114.894	17.0243	20.7754
chr22	24577227	24585078	+	ENSG00000099994.10	SUSD2	0.967839	Lung	1.12866	0.360382	68.6524	3.04032	1.1577	6.21479	1.34579
chr22	24863206	24924358	+	ENSG00000100024.10	UPB1	0.995713	Liver	0.177702	0.207764	1.24752	0.311176	93.99	0.309229	0.16394
chr22	26565440	26779562	+	ENSG00000100095.14	SEZ6L	0.993969	Brain	0.0952515	33.1786	0.084463	0.505005	0.120168	0.099276	0.296409
chr22	29708922	29715668	-	ENSG00000100276.9	RASL10A	0.946446	Brain	0.212235	10.366	0.941718	0.499207	0.412897	0.800443	0.464313
chr22	30792846	30821305	+	ENSG00000100003.13	SEC14L2	0.906462	Liver	7.55725	13.2398	1.53174	2.71765	55.2332	4.73765	1.21433
chr22	31518717	31530682	+	ENSG00000185133.9	INPP5J	0.980129	Thyroid	0.551171	3.22571	1.20632	1.58253	0.08317	75.3581	2.33563
chr22	35462129	35483380	+	ENSG00000175329.8	ISX	0.99942	Intestine	0	0	0	0.017853	0.0223755	0	11.5675
chr22	37461476	37505603	-	ENSG00000187045.12	TMPRSS6	0.994044	Liver	0.0369475	0.0077805	0.546607	0.146362	39.5865	0.0937445	0.583299
chr22	37764000	37823505	-	ENSG00000166897.10	ELFN2	0.983665	Brain	0.00893	12.012	0.972437	0.063822	0.0445975	0.023826	0.063659
chr22	37966255	37978623	-	ENSG00000100079.5	LGALS2	0.852914	Intestine	2.69122	0.0519415	2.15077	4.14252	1.03775	0.793767	12.3147
chr22	38366693	38383429	-	ENSG00000100146.12	SOX10	0.936256	Brain	1.03226	26.8341	0.109449	3.92157	0.078574	0.293233	4.82802
chr22	38822332	38851205	-	ENSG00000168135.4	KCNJ4	0.999118	Brain	0	13.4329	0	0	0.060072	0	0.0110035
chr22	39214457	39239987	-	ENSG00000221890.2	NPTXR	0.937334	Brain	1.24321	36.9658	1.86528	4.9371	0.273013	2.7457	2.83477
chr22	39745930	39781593	+	ENSG00000100321.10	SYNGR1	0.867475	Brain	10.0743	49.1723	4.95833	9.05092	2.08533	6.31353	6.61691
chr22	41625517	41636938	-	ENSG00000100399.11	CHADL	0.853578	Brain	0.995537	11.3039	1.591	1.91212	0.667899	2.78766	1.9766
chr22	42372276	42394225	+	ENSG00000100167.15	SEPT3	0.996557	Brain	0.166773	71.2841	0.343367	0.246827	0.049704	0.269946	0.395806
chr22	42522501	42526908	-	ENSG00000100197.16	CYP2D6	0.995342	Liver	0.182478	0.39269	0.224805	0.293632	69.5048	0.464473	0.384524
chr22	43807202	43903728	+	ENSG00000186732.9	MPPED1	0.964251	Brain	0.020939	17.6546	0.015518	0.090275	3.61096	0.001162	0.047901
chr22	44220389	44258398	-	ENSG00000130540.9	SULT4A1	0.994387	Brain	0	40.58	0.036034	0.614208	0.0166995	0.0088715	0.690936
chr22	44319619	44360368	+	ENSG00000100344.6	PNPLA3	0.982094	Liver	0.138624	1.11631	0.912233	0.192635	24.1702	0.115265	0.12174
chr22	48885272	49246724	+	ENSG00000219438.4	FAM19A5	0.969515	Brain	0.207347	23.2422	1.10564	0.844772	1.03352	0.149066	0.910943
chr22	50497820	50524331	-	ENSG00000100427.11	MLC1	0.994621	Brain	0.053482	39.0176	0.927275	0.082311	0.072612	0.070238	0.0533325
chr22	51039114	51052409	+	ENSG00000008735.10	MAPK8IP2	0.98195	Brain	0.692307	42.6427	0.669499	0.966189	0.164972	0.905685	1.2196
chrX	2852699	2886286	-	ENSG00000157399.10	ARSE	0.929651	Liver	0.188972	0.834481	1.32533	1.27338	32.8981	0.105179	10.1588
chrX	5758678	6146904	-	ENSG00000146938.10	NLGN4X	0.904643	Brain	0.621394	10.9392	0.913067	1.26554	0.738476	0.641549	2.07871
chrX	8496915	8700227	-	ENSG00000011201.6	KAL1	0.917051	Lung	1.23505	7.92511	35.3701	0.59936	0.367951	6.9693	0.506746
chrX	10125024	10205700	+	ENSG00000073464.7	CLCN4	0.895383	Brain	0.487698	18.9815	3.9156	0.985652	1.8038	4.00146	0.720579
chrX	13587724	13651694	+	ENSG00000198759.7	EGFL6	0.940989	Lung	3.15909	0.098511	10.1456	0.174634	0.019407	0.070557	0.0700115
chrX	13789150	13956757	-	ENSG00000046653.10	GPM6B	0.971675	Brain	3.60634	237.251	12.0065	12.3455	0.256604	3.04218	9.06376
chrX	15363713	15402498	-	ENSG00000165197.4	FIGF	0.942636	Lung	1.04147	0.515606	20.2408	3.59038	0.193008	0.273277	1.35287
chrX	20024831	20135035	-	ENSG00000184368.11	MAP7D2	0.983918	Brain	0.108516	12.4937	0.062307	0.571799	0.0345285	0.0611945	0.367174
chrX	21392536	21672813	+	ENSG00000149970.10	CNKSR2	0.952961	Brain	0.297267	20.926	1.64139	2.34333	0.436667	0.769766	0.41764
chrX	28605516	29974840	+	ENSG00000169306.5	IL1RAPL1	0.961029	Brain	0.274519	10.113	0.07948	0.815179	0.05247	0.406031	0.73701
chrX	38211798	38280703	+	ENSG00000036473.6	OTC	0.995352	Liver	0.0902595	0.0928945	0.445572	0.599226	85.6543	0.127435	1.03321
chrX	38420623	38548169	+	ENSG00000156298.8	TSPAN7	0.871814	Brain	11.2606	126.941	34.714	9.83805	8.81418	14.0786	18.9272
chrX	46937775	46952712	+	ENSG00000130988.8	RGN	0.945101	Liver	0.941959	2.25985	3.17449	1.93769	39.7518	3.87271	0.907391
chrX	47431303	47479252	-	ENSG00000008056.8	SYN1	0.997007	Brain	0.0861275	64.6319	0.105686	0.420037	0.106754	0.068395	0.373502
chrX	47483612	47489704	-	ENSG00000126759.8	CFP	0.874281	Liver	2.00838	0.437084	3.24041	2.07592	12.9346	0.692778	1.30217
chrX	48379546	48387104	+	ENSG00000147155.6	EBP	0.874876	Liver	3.27665	2.04879	4.6969	4.35201	38.5046	3.86069	10.6721
chrX	48689504	48694035	-	ENSG00000102109.7	PCSK1N	0.976356	Brain	0	25.639	0.443986	1.6167	0.040152	0.216126	1.32026
chrX	49044269	49056718	-	ENSG00000102003.6	SYP	0.984604	Brain	0.092261	35.3052	0.69015	0.952469	0.07107	0.351081	1.10442
chrX	50334647	50557302	-	ENSG00000158352.11	SHROOM4	0.863148	Lung	1.48344	3.50512	11.6398	1.20146	0.404097	1.99354	0.969931
chrX	54959394	55024967	-	ENSG00000158571.6	PFKFB1	0.979496	Liver	0.138394	0.26839	0.098293	0.10781	10.8845	0.58351	0.142644
chrX	65382391	65488709	+	ENSG00000089472.12	HEPH	0.884128	Intestine	3.47833	5.92767	7.24229	25.3062	1.28272	2.42605	65.6807
chrX	66764465	66950461	+	ENSG00000169083.11	AR	0.901024	Liver	1.79897	0.807195	3.20048	2.92057	23.2568	3.60335	1.48053
chrX	70364681	70391051	+	ENSG00000196338.8	NLGN3	0.968045	Brain	0.410938	21.6831	0.605077	1.37821	0.113255	0.447686	1.20215
chrX	70435044	70445366	+	ENSG00000169562.9	GJB1	0.949863	Liver	0.0532795	12.286	0.720049	3.72367	87.2507	0.124142	9.33947
chrX	72432135	72434684	-	ENSG00000186462.7	NAP1L2	0.898874	Brain	1.49409	21.6506	1.74204	2.74911	0.322255	4.49897	2.33009
chrX	84498997	84528368	+	ENSG00000147180.12	ZNF711	0.856308	Brain	1.7018	10.2145	1.15683	0.983684	0.29027	3.34797	1.32587
chrX	92925929	92928567	-	ENSG00000186310.9	NAP1L3	0.949634	Brain	0.714178	31.8947	1.32418	2.21131	0.531331	2.67772	2.17981
chrX	100098313	100129334	-	ENSG00000007952.13	NOX1	0.999386	Intestine	0.022894	0.0062595	0.054937	0.011327	0.0023175	0.0028125	27.3121
chrX	100645812	100651105	+	ENSG00000241343.5	RPL36A	0.873079	Esophagus	136.837	13.5131	15.5866	39.7236	11.0084	15.4033	8.97036
chrX	102317579	102319168	-	ENSG00000133169.5	BEX1	0.974414	Brain	0.1321	47.9869	0.430655	1.17328	0.490477	4.45894	0.681196
chrX	102585124	102587254	+	ENSG00000182916.7	TCEAL7	0.90476	Brain	1.95991	24.9742	2.03358	5.02977	0.328085	1.17042	3.74949
chrX	103028647	103047548	+	ENSG00000123560.9	PLP1	0.996444	Brain	1.28865	1330.68	0.320212	8.51005	0.168628	1.0556	17.0514
chrX	105277197	105282729	-	ENSG00000123561.10	SERPINA7	0.999784	Liver	0	0	0.011533	0.059901	77.2335	0.006448	0.0223125
chrX	107288200	107322414	+	ENSG00000101842.9	VSIG1	0.993983	Stomach	0.159873	0.081244	0.127434	15.2846	0.053498	0.084956	0.0448365
chrX	110187513	110470589	+	ENSG00000077264.10	PAK3	0.916709	Brain	0.82857	27.8742	1.04544	1.78803	0.187555	9.39083	0.689604
chrX	122318006	122624766	+	ENSG00000125675.13	GRIA3	0.974826	Brain	0.481826	29.0702	0.231677	0.881109	1.67168	0.167792	0.956871
chrX	128779240	128788933	-	ENSG00000171388.9	APLN	0.888129	Lung	0.22194	6.70189	11.7767	0.466813	0.104028	0.187536	0.222631
chrX	132669773	133119922	-	ENSG00000147257.9	GPC3	0.949088	Lung	1.08723	0.254383	49.9126	2.63386	1.93019	7.84714	1.49399
chrX	137713735	138304939	-	ENSG00000129682.9	FGF13	0.858604	Brain	1.9389	16.1285	1.74909	2.94299	0.722547	2.6879	3.6416
chrX	138612917	138645617	+	ENSG00000101981.6	F9	0.999886	Liver	0	0	0	0.093991	157.423	0.01329	0
chrX	139791932	139854844	+	ENSG00000203930.6	LINC00632	0.987317	Brain	0.153193	19.3159	0.380379	0.321656	0	0.357063	0.257619
chrX	139865425	139866723	-	ENSG00000184258.5	CDR1	0.983028	Brain	0	59.5396	2.93833	0.947643	0.0754005	1.54608	0.555532
chrX	152082986	152142024	+	ENSG00000147394.14	ZNF185	0.94721	Esophagus	57.7226	0.598785	4.79854	1.05827	0.577099	9.75479	1.49544
chrX	153029651	153044801	+	ENSG00000198753.7	PLXNB3	0.898576	Brain	1.20974	15.2296	0.669859	4.23424	0.209347	0.152947	2.79176
chrX	153067621	153096020	-	ENSG00000067840.8	PDZD4	0.964363	Brain	0.82017	50.6859	1.76383	3.72517	0.584178	0.783497	3.16084
