# Supplementary material for: Characterization of distinct circular RNA signatures in solid tumors
Source: Mol Cancer. 2022 Mar 2;21:63. doi: 10.1186/s12943-022-01546-4 (PMC8889743; doi:10.1186/s12943-022-01546-4)
Supplement: Supplementary file 7 — Additional file 7: Table S10. The expression profiles of 30 circRNAs that ubiquitously expressed in normal tissues. [file 12943_2022_1546_MOESM7_ESM.xlsx]

## Sheet: Table S10
Table S10. The expression profiles of 30 circRNAs that ubiquitously expressed in normal tissues.
chr	start	end	strand	exon count	exon sizes	gene name	circBase_ID	genomic_length	spliced_length	Yanai specificity	circRNA _type	Esophagus_median_RPM	Brain_median_RPM	Lung_median_RPM	Stomach_median_RPM	Liver_median_RPM	Thyroid_median_RPM	Intestine_median_RPM
chr12	69983264	69987393	+	4	203,101,128,104	CCT2	hsa_circ_0002940	4129	536	0.236358	Ubiquitous	0.139676	0.123756	0.122857	0.0934236	0.0622719	0.121227	0.116439
chr12	121220457	121222396	-	3	113,79,120	SPPL3	hsa_circ_0003472	1939	312	0.295166	Ubiquitous	0.562396	0.546069	0.333139	0.509627	0.213704	0.519627	0.256211
chr11	32948702	32956981	+	3	113,162,3693	QSER1	hsa_circ_0021570	8279	3968	0.204328	Ubiquitous	0.131915	0.147992	0.105609	0.151788	0.0783702	0.136093	0.124659
chr11	61133516	61135470	+	2	172,76	TMEM138	hsa_circ_0002058	1954	248	0.283588	Ubiquitous	0.210502	0.16262	0.375945	0.316795	0.25748	0.358587	0.310006
chr11	85718584	85742653	-	7	42,107,112,94,103,76,143	PICALM	hsa_circ_0023936	24069	677	0.251765	Ubiquitous	0.175855	0.210907	0.279837	0.247926	0.169072	0.273859	0.178683
chr11	85722072	85742653	-	6	107,112,94,103,76,143	PICALM	hsa_circ_0000347	20581	635	0.261523	Ubiquitous	0.0988692	0.215272	0.269134	0.268593	0.17044	0.256779	0.18254
chr17	4186092	4200109	-	3	124,179,98	UBE2G1	hsa_circ_0003239	14017	401	0.214876	Ubiquitous	0.183076	0.164976	0.213209	0.247926	0.200668	0.218733	0.187255
chr17	80721840	80739597	+	5	98,102,147,56,133	TBCD	hsa_circ_0000818	17757	536	0.294886	Ubiquitous	0.111601	0.165422	0.133507	0.133361	0.172393	0.200217	0.130772
chr15	25650607	25657118	-	3	42,120,64	UBE3A	hsa_circ_0000586	6511	226	0.265722	Ubiquitous	1.07816	0.626817	0.947903	1.44198	1.21532	1.48388	1.2273
chr14	23395341	23396869	-	4	164,50,113,135	PRMT5	hsa_circ_0002928	1528	462	0.279877	Ubiquitous	0.119823	0.0738913	0.168293	0.193835	0.105569	0.194542	0.198104
chr14	91947919	91957146	-	3	618,99,56	SMEK1	hsa_circ_0032965	9227	773	0.240334	Ubiquitous	0.0605542	0.117156	0.105609	0.0964158	0.0623147	0.113251	0.12183
chr19	17387303	17387718	+	2	130,87	BABAM1	hsa_circ_0003253	415	217	0.294838	Ubiquitous	0.141381	0.0779329	0.213612	0.204093	0.122336	0.185449	0.172592
chr18	9583114	9595100	-	7	159,66,108,147,143,107,85	PPP4R1	hsa_circ_0009022	11986	815	0.271648	Ubiquitous	0.398757	0.449044	0.54718	0.533782	0.128326	0.502707	0.378619
chr18	9583114	9595151	-	7	159,66,108,147,143,107,136	PPP4R1	hsa_circ_0007509	12037	866	0.236528	Ubiquitous	0.350235	0.305412	0.446641	0.386747	0.181367	0.464354	0.456727
chr6	34574331	34614575	-	2	350,198	C6orf106	hsa_circ_0009095	40244	548	0.287018	Ubiquitous	0.0423151	0.0359979	0.0961674	0.0934236	0.0904722	0.102393	0.0796501
chr8	99718694	99719539	-	2	168,165	STK3	hsa_circ_0004592	845	333	0.240769	Ubiquitous	0.377012	0.176121	0.391414	0.394648	0.138929	0.346431	0.367866
chrX	134679347	134690225	+	7	150,90,184,129,164,153,133	DDX26B	hsa_circ_0139799	10878	1003	0.295288	Ubiquitous	0.136194	0.211221	0.19717	0.196341	0.0256702	0.144937	0.192787
chr9	98740342	98766983	+	2	155,182	ERCC6L2	hsa_circ_0008720	26641	337	0.282541	Ubiquitous	0.152081	0.130947	0.0667537	0.133361	0.153453	0.0979378	0.0795
chr9	114148656	114154104	-	4	80,168,118,69	KIAA0368	hsa_circ_0001882	5448	435	0.174658	Ubiquitous	0.438464	0.404406	0.474556	0.458607	0.313021	0.42594	0.309589
chr9	138773478	138774924	-	2	162,263	CAMSAP1	hsa_circ_0001900	1446	425	0.175333	Ubiquitous	0.869495	0.820776	0.869875	0.785364	0.743311	1.01011	1.0305
chr20	21321358	21327188	+	3	132,119,136	XRN2	hsa_circ_0002985	5830	387	0.296415	Ubiquitous	0.0400677	0.118051	0.11881	0.136609	0.0569228	0.128863	0.11398
chr7	65705311	65706257	+	1	946	TPST1	hsa_circ_0007672	946	946	0.219673	Ubiquitous	0.084335	0.0873787	0.0883462	0.074552	0.108832	0.10805	0.0668829
chr7	152007050	152012423	-	3	110,149,201	KMT2C	hsa_circ_0001769	5373	460	0.294502	Ubiquitous	0.306931	0.21979	0.202128	0.336585	0.0966713	0.290458	0.343153
chr5	167915606	167921655	+	4	135,189,109,101	RARS	hsa_circ_0001550	6049	534	0.250659	Ubiquitous	1.31731	1.01298	0.999418	0.910725	0.757427	1.29775	0.944397
chr2	99802639	99812219	+	5	78,81,147,74,184	C2orf15	hsa_circ_0001051	9580	564	0.283402	Ubiquitous	0.0811982	0.125273	0.116591	0.123121	0.0395375	0.0862889	0.091884
chr1	51868106	51874004	-	4	91,114,204,198	EPS15	hsa_circ_0005567	5898	607	0.268871	Ubiquitous	0.122239	0.248499	0.259879	0.178925	0.153099	0.251203	0.186065
chr1	78177431	78181553	-	4	109,82,170,127	USP33	hsa_circ_0005374	4122	488	0.299743	Ubiquitous	0.117371	0.093474	0.126272	0.0948842	0.0566704	0.113993	0.0541452
chr1	113196219	113202401	+	4	64,207,80,79	CAPZA1	hsa_circ_0000109	6182	430	0.276424	Ubiquitous	0.238908	0.151101	0.19717	0.238566	0.0815634	0.221141	0.147667
chr1	197611840	197627499	-	4	111,54,81,70	DENND1B	hsa_circ_0006324	15659	316	0.270142	Ubiquitous	0.153769	0.158123	0.105157	0.12143	0.14922	0.178976	0.0960655
chr4	39915230	39927553	-	5	116,141,81,127,98	PDS5A	hsa_circ_0007308	12323	563	0.272756	Ubiquitous	0.122571	0.0331546	0.097018	0.0790702	0.105361	0.116772	0.10346
