# Supplementary material for: Characterization of distinct circular RNA signatures in solid tumors
Source: Mol Cancer. 2022 Mar 2;21:63. doi: 10.1186/s12943-022-01546-4 (PMC8889743; doi:10.1186/s12943-022-01546-4)
Supplement: Supplementary file 8 — Additional file 8: Table S11. The expression profiles of 439 tissue-specific circRNAs. [file 12943_2022_1546_MOESM8_ESM.xlsx]

## Sheet: Table S11
Table S11. The expression profiles of 439 tissue-specific circRNAs.
chr	start	end	strand	exon count	exon sizes	gene Name	circBase_ID	genomic_length	spliced_length	Yanai specificity	Tissue	Esophagus_median_RPM	Brain_median_RPM	Lung_median_RPM	Stomach_median_RPM	Liver_median_RPM	Thyroid_median_RPM	Intestine_median_RPM
chr13	26974589	26975761	+	3	98,79,159	CDK8	hsa_circ_0003489	1172	336	0.960308	Esophagus	0.16186	0.0252111	0	0.0133361	0	0	0
chr13	40268770	40301685	+	7	92,118,132,168,108,54,80	COG6	hsa_circ_0030034	32915	752	0.926767	Brain	0.00864359	0.335802	0.0120209	0.0137737	0	0.0839002	0.0292116
chr13	42742575	42764661	+	7	109,140,85,86,100,274,123	DGKH	hsa_circ_0100496	22086	917	1	Brain	0	0.14893	0	0	0	0	0
chr13	78293666	78327493	+	4	140,150,342,156	SLAIN1	hsa_circ_0000497	33827	788	0.958508	Brain	0.0474501	2.06795	0.0697877	0.0933527	0.0767848	0.189075	0.0383652
chr13	78318417	78327493	+	3	150,342,156	SLAIN1	hsa_circ_0100935	9076	648	0.982069	Brain	0	0.417214	0.0144377	0	0	0.0304488	0
chr13	79915257	79918929	-	4	105,168,75,126	RBM26	hsa_circ_0030533	3672	474	0.906924	Brain	0.0201573	0.237902	0.0266511	0.0307802	0	0.0295964	0.0256721
chr13	96622365	96648389	-	6	151,92,61,100,101,73	UGGT2	hsa_circ_0101079	26024	578	0.870381	Brain	0.0176726	0.148476	0.0294487	0.0151788	0.00667077	0.029735	0.0167656
chr13	101997616	102051516	-	6	155,129,140,84,183,147	NALCN	hsa_circ_0099761	53900	838	0.995284	Brain	0	0.470894	0.0133256	0	0	0	0
chr13	102029050	102051516	-	5	129,140,84,183,147	NALCN	hsa_circ_0099765	22466	683	1	Brain	0	0.179392	0	0	0	0	0
chr13	111857635	111885640	+	4	85,131,202,89	ARHGEF7	hsa_circ_0030914	28005	507	0.903663	Brain	0.020248	0.142164	0.0120209	0.0233559	0.00661421	0.00667273	0.0132622
chr12	22637630	22659753	-	4	192,96,115,109	C2CD5	hsa_circ_0025612	22123	512	0.986353	Brain	0	0.509273	0	0.0140244	0	0.0132321	0.014444
chr12	23793745	24048958	-	7	86,121,69,173,87,211,232	SOX5	hsa_circ_0025624	255213	979	1	Liver	0	0	0	0	0.13338	0	0
chr12	23998916	24048958	-	2	211,232	SOX5	hsa_circ_0098181	50042	443	0.99064	Liver	0.0174268	0.013505	0	0	0.550803	0	0
chr12	40422102	40442012	-	2	209,160	SLC2A13	hsa_circ_0007918	19910	369	0.859331	Brain	0.0203892	0.191292	0.0242545	0.0615604	0.0155156	0.0140139	0.0257196
chr12	41374710	41423021	+	8	159,150,71,235,104,187,113,157	CNTN1	hsa_circ_0098535	48311	1176	1	Brain	0	0.101259	0	0	0	0	0
chr12	52077957	52082880	+	4	119,90,129,92	SCN8A	hsa_circ_0098779	4923	430	1	Brain	0	0.11363	0	0	0	0	0
chr12	56871443	56872046	-	3	59,164,80	GLS2	hsa_circ_0098835	603	303	0.96475	Liver	0.0202206	0.0393334	0	0	0.281579	0	0
chr12	79679566	79693331	+	4	185,123,168,168	SYT1	hsa_circ_0099287	13765	644	1	Brain	0	0.141793	0	0	0	0	0
chr12	81719555	81778023	-	14	94,155,131,30,238,221,136,92,63,132,84,135,147,222	PPFIA2	hsa_circ_0099329	58468	1880	1	Brain	0	0.108999	0	0	0	0	0
chr12	90013775	90029028	-	8	242,243,215,162,39,141,126,255	ATP2B1	hsa_circ_0099456	15253	1423	0.949642	Brain	0	0.194864	0.0133507	0.0156995	0	0.0147272	0.0150999
chr12	97886238	97924637	+	5	146,109,128,187,205	RMST	hsa_circ_0027821	38399	775	0.9975	Thyroid	0	0.015942	0	0	0	1.06271	0
chr12	97886238	97954476	+	6	146,109,128,187,205,162	RMST	hsa_circ_0099633	68238	937	1	Thyroid	0	0	0	0	0	0.13938	0
chr12	97886238	97954825	+	7	146,109,128,187,205,162,251	RMST	hsa_circ_0099634	68587	1188	0.989446	Thyroid	0.0398935	2.03746	0.0814158	0.193835	0.0278272	38.52	0.0588789
chr12	99166819	99194903	-	5	138,87,12,72,129	ANKS1B	hsa_circ_0099668	28084	438	0.965156	Brain	0	0.196226	0	0	0	0.0273867	0.0136372
chr12	99166819	99225914	-	7	138,87,12,72,129,180,108	ANKS1B	hsa_circ_0099671	59095	726	1	Brain	0	0.309868	0	0	0	0	0
chr12	99192711	99225914	-	4	72,129,180,108	ANKS1B	hsa_circ_0099680	33203	489	1	Brain	0	0.181885	0	0	0	0	0
chr12	100166699	100219167	-	7	167,114,102,76,297,157,81	ANKS1B	hsa_circ_0096922	52468	994	0.896397	Thyroid	0.00927269	0.0440539	0	0.0156995	0	0.131473	0.0127001
chr12	101316003	101381448	+	6	105,137,159,101,107,132	ANO4	hsa_circ_0027871	65445	741	1	Brain	0	0.144702	0	0	0	0	0
chr12	130184354	130185243	-	1	889	TMEM132D	hsa_circ_0097876	889	889	1	Brain	0	0.796688	0	0	0	0	0
chr12	130884223	130907106	-	6	135,72,104,169,182,109	RIMBP2	hsa_circ_0097878	22883	771	1	Brain	0	0.220323	0	0	0	0	0
chr11	18010143	18029623	-	8	159,63,114,79,61,95,156,136	SERGEF	hsa_circ_0021412	19480	863	0.914625	Brain	0	0.238881	0.0249839	0.0149104	0.0209726	0.0341192	0.0273816
chr11	22696395	22777499	+	6	165,122,142,64,142,108	GAS2	hsa_circ_0095626	81104	743	0.918979	Brain	0	0.264691	0.0139575	0	0.0835847	0.0311318	0
chr11	30516842	30557722	-	2	226,182	MPPED2	hsa_circ_0021549	40880	408	0.955317	Thyroid	0	0.0232598	0	0.0233559	0	0.173875	0
chr11	33572585	33573787	+	2	220,134	KIAA1549L	hsa_circ_0021609	1202	354	1	Brain	0	0.132021	0	0	0	0	0
chr11	46098304	46113774	-	4	66,33,137,41	PHF21A	hsa_circ_0000296	15470	277	0.859967	Brain	0.367261	0.855477	0.0491428	0.109896	0.035331	0.0987161	0.0584232
chr11	49597597	49598458	+	1	861	RP11-707M1.1	hsa_circ_0095967	861	861	1	Brain	0	0.110502	0	0	0	0	0
chr11	58317258	58318705	-	3	82,174,168	LPXN	hsa_circ_0002904	1447	424	0.985988	Brain	0	0.234283	0	0.0133361	0	0	0.00636083
chr11	59426338	59426942	-	2	81,218	PATL1	hsa_circ_0004162	604	299	0.871975	Esophagus	0.111064	0.021109	0.0132011	0.0156995	0.0136047	0.0152244	0.0064752
chr11	64453117	64453419	-	1	302	NRXN2	hsa_circ_0096106	302	302	1	Brain	0	0.131632	0	0	0	0	0
chr11	85701292	85742653	-	12	129,104,137,124,86,42,107,112,94,103,76,143	PICALM	hsa_circ_0023918	41361	1257	0.861826	Brain	0.0890491	0.668567	0.0892673	0.142326	0.0398549	0.0576375	0.136135
chr11	107916996	107925682	+	5	100,177,142,146,81	CUL5	hsa_circ_0024169	8686	646	0.855867	Esophagus	0.13329	0.0527633	0.0122857	0.0298208	0	0.0203994	0
chr11	128963515	129034322	-	4	87,85,92,109	ARHGAP32	hsa_circ_0024843	70807	373	0.905052	Brain	0.0363718	0.274433	0.0120209	0.0303575	0.013326	0.0335543	0.0307101
chr11	128993340	129034322	-	3	85,92,109	ARHGAP32	hsa_circ_0007843	40982	286	0.934918	Brain	0.0956512	1.08203	0.0441731	0.0841462	0.0362577	0.0846225	0.0776736
chr10	15838098	15889942	-	9	73,81,71,80,74,115,174,61,80	FAM188A	hsa_circ_0017848	51844	809	0.90698	Brain	0	0.194436	0.0133256	0.0233559	0.0128574	0.0311803	0.0277994
chr10	62021616	62039397	-	6	99,186,99,99,99,102	ANK3	hsa_circ_0018440	17781	684	0.865736	Thyroid	0.0191885	0.0456613	0.0148546	0	0	0.114705	0.0127001
chr10	74100546	74100928	-	2	80,186	DNAJB12	hsa_circ_0008662	382	266	0.857286	Esophagus	0.106726	0.0351114	0	0.0420731	0.0142034	0	0
chr10	76602357	76603236	+	1	879	KAT6B	hsa_circ_0005235	879	879	0.892514	Brain	0.029016	0.229367	0.0166559	0.0307802	0	0.041529	0.0299419
chr10	90661412	90682193	+	9	83,218,76,96,358,125,138,113,100	STAMBPL1	hsa_circ_0019061	20781	1307	0.866318	Brain	0.0180559	0.119358	0.0400522	0.0233559	0	0	0.0142723
chr10	96493053	96541754	+	5	142,163,150,161,177	CYP2C19	hsa_circ_0094597	48701	793	0.970849	Liver	0.0190391	0	0	0	0.108853	0	0
chr10	112356155	112358048	+	2	153,152	SMC3	hsa_circ_0000260	1893	305	0.922211	Esophagus	0.164817	0.0258992	0.0122857	0.0233559	0	0.0153852	0
chr10	116879948	116889297	+	5	84,114,129,102,209	ATRNL1	hsa_circ_0020093	9349	638	0.963371	Brain	0.0404412	0.812924	0	0.0560974	0.0256435	0.0154051	0.0410724
chr10	116879948	116925405	+	7	84,114,129,102,209,175,88	ATRNL1	hsa_circ_0020094	45457	901	1	Brain	0	0.284424	0	0	0	0	0
chr10	116879948	116931050	+	7	84,114,129,209,175,88,256	ATRNL1	hsa_circ_0092763	51102	1055	0.992069	Brain	0	0.542313	0	0	0	0	0.0258056
chr10	116879948	116975638	+	8	84,114,129,209,175,88,256,184	ATRNL1	hsa_circ_0092765	95690	1239	1	Brain	0	0.811936	0	0	0	0	0
chr10	123549683	123683844	-	10	121,100,182,33,129,230,246,104,63,64	ATE1	hsa_circ_0007062	134161	1272	0.99373	Brain	0	0.201938	0	0	0	0.00759686	0
chr17	15905228	15909882	+	5	111,39,57,62,95	TTC19	hsa_circ_0106234	4654	364	0.965284	Brain	0	0.136525	0	0	0	0.0144761	0.0139613
chr17	45405634	45422464	+	6	115,246,161,112,131,83	EFCAB13	hsa_circ_0044241	16830	848	0.879944	Thyroid	0	0	0.0368571	0.0156995	0.0143302	0.132203	0.0283432
chr17	45695715	45696530	+	2	108,156	NPEPPS	hsa_circ_0004622	815	264	0.987644	Esophagus	0.476636	0.0155241	0	0.0133361	0	0	0.0064752
chr17	57430575	57430887	+	1	312	YPEL2	hsa_circ_0005600	312	312	0.917771	Esophagus	0.378988	0.0316129	0.0249839	0.0948842	0.0201174	0.0153852	0
chr17	57808781	57851246	+	6	102,136,91,111,168,132	VMP1	hsa_circ_0005077	42465	740	0.878756	Brain	0.063423	0.749791	0.101064	0.120025	0.0358605	0.109158	0.115917
chr17	77073511	77073946	+	2	68,202	ENGASE	hsa_circ_0008114	435	270	0.977096	Esophagus	0.104687	0.0143863	0	0	0	0	0
chr16	7629778	7657340	+	5	144,54,93,61,54	RBFOX1	hsa_circ_0105987	27562	406	1	Brain	0	0.10268	0	0	0	0	0
chr16	11940357	11941663	-	3	102,149,139	RSL1D1	hsa_circ_0006979	1306	390	0.896167	Esophagus	0.133921	0.0167837	0	0.0467118	0.0133774	0.00655941	0
chr16	22142525	22143050	+	2	75,145	VWA3A	hsa_circ_0038484	525	220	0.937938	Lung	0	0.0387202	0.103982	0	0	0	0
chr16	29917108	29917448	+	2	172,49	ASPHD1	hsa_circ_0105346	340	221	0.986013	Brain	0	0.158913	0	0.0133361	0	0	0
chr16	53907697	53968021	+	4	80,144,120,125	FTO	hsa_circ_0039400	60324	469	0.902259	Brain	0	0.246524	0.0144377	0.0400083	0.0143796	0.0460022	0.0297447
chr16	56385295	56388993	+	2	154,216	GNAO1	hsa_circ_0105619	3698	370	0.936132	Brain	0	0.159787	0	0.0316281	0.029603	0	0
chr15	33149215	33194241	-	5	93,121,60,147,130	FMN1	hsa_circ_0005054	45026	551	0.96722	Brain	0	0.232321	0	0.0133361	0	0.0194541	0.0129028
chr15	33445248	33447246	-	1	1998	FMN1	hsa_circ_0103284	1998	1998	0.984406	Brain	0	0.642631	0.0139575	0.0461703	0	0	0
chr15	40005644	40034101	-	5	138,159,111,125,96	FSIP1	hsa_circ_0103403	28457	629	0.964207	Brain	0	0.163251	0	0.0151788	0	0.0198803	0
chr15	59204761	59209198	-	3	48,198,65	SLTM	hsa_circ_0000605	4437	311	0.958379	Esophagus	0.877629	0.0832942	0.0298671	0.0307802	0.014219	0.0483514	0.0126525
chr15	63988322	64008672	-	6	216,269,52,121,313,172	HERC1	hsa_circ_0035796	20350	1143	0.853747	Brain	0.115816	1.07887	0.124919	0.164014	0.123257	0.278527	0.140191
chr15	76152218	76165909	+	3	105,60,141	UBE2Q2	hsa_circ_0104568	13691	306	0.866321	Esophagus	0.268646	0.027576	0.0325663	0.0790702	0.0139136	0.0317451	0.0306025
chr15	83819966	83826793	-	3	147,159,139	HDGFRP3	hsa_circ_0104714	6827	445	0.97166	Brain	0.0195971	0.115251	0	0	0	0	0
chr15	84228004	84257523	+	7	69,73,144,134,159,104,110	SH3GL3	hsa_circ_0104727	29519	793	0.995011	Brain	0.0174268	0.582117	0	0	0	0	0
chr15	88472421	88483984	-	3	244,173,131	NTRK3	hsa_circ_0036657	11563	548	1	Brain	0	0.328526	0	0	0	0	0
chr15	94899365	94945248	+	9	165,131,187,94,103,103,102,75,120	MCTP2	hsa_circ_0000660	45883	1080	0.860513	Thyroid	0.0909325	0.0366845	0.224855	0.0474421	0.0141633	0.670812	0.14734
chr15	101929668	101970268	-	5	101,213,173,89,77	PCSK6	hsa_circ_0037100	40600	653	0.941922	Liver	0	0.0538253	0	0.0149104	0.19725	0	0
chr15	102241288	102255166	-	7	99,147,79,65,118,122,124	TARSL2	hsa_circ_0037108	13878	754	0.870916	Brain	0.0203732	0.246434	0.0245714	0.0461703	0.0149869	0.041946	0.0428169
chr14	32559707	32563592	+	1	3885	ARHGAP5	hsa_circ_0031583	3885	3885	0.939594	Esophagus	1.30291	0.031341	0.0280605	0.12143	0.0278486	0.211292	0.0522499
chr14	33684387	33684793	+	2	245,51	NPAS3	hsa_circ_0101677	406	296	0.851966	Brain	0.0523524	0.43316	0.0249839	0.175169	0	0.0738055	0.0584232
chr14	39648294	39648666	+	2	156,139	PNN	hsa_circ_0101802	372	295	0.962385	Esophagus	0.321001	0.0295372	0.0148779	0	0.0142594	0.013772	0
chr14	50929382	50952912	-	10	117,82,63,132,73,43,48,56,65,91	MAP4K5	hsa_circ_0102037	23530	770	1	Brain	0	0.119001	0	0	0	0	0
chr14	61262934	61346553	+	6	153,74,104,141,126,122	MNAT1	hsa_circ_0032117	83619	720	0.851246	Brain	0.019918	0.228584	0.0368571	0.0550948	0	0.0747427	0.0174038
chr14	61275042	61346553	+	4	104,141,126,122	MNAT1	hsa_circ_0004244	71511	493	0.908763	Brain	0.0201728	0.103497	0	0.0303575	0	0.00612639	0
chr14	61278704	61346553	+	3	141,126,122	MNAT1	hsa_circ_0008215	67849	389	0.926551	Brain	0.0199102	0.287023	0.0149336	0.0420731	0	0.0279516	0.0216211
chr14	61503776	61518853	+	9	83,59,66,54,80,101,125,145,95	SLC38A6	hsa_circ_0102304	15077	808	0.942941	Brain	0	0.100951	0.0144377	0	0.00661421	0.0135092	0
chr14	70633355	70635201	-	1	1846	SLC8A3	hsa_circ_0000551	1846	1846	1	Brain	0	0.100704	0	0	0	0	0
chr14	80163972	80271533	+	2	308,79	NRXN3	hsa_circ_0032812	107561	387	0.915875	Stomach	0.0609345	0	0.0132011	0.490474	0	0.00624615	0.167185
chr14	91409421	91467503	-	4	108,116,219,72	RPS6KA5	hsa_circ_0032940	58082	515	0.853604	Stomach	0.0632978	0.0604143	0	0.184681	0	0	0.0385081
chr14	93934016	93954101	+	4	121,146,171,93	UNC79	hsa_circ_0102953	20085	531	1	Brain	0	0.139264	0	0	0	0	0
chr14	93934016	93963632	+	6	121,146,171,93,56,130	UNC79	hsa_circ_0102954	29616	717	1	Brain	0	0.196591	0	0	0	0	0
chr14	96807858	96813678	-	5	180,163,103,153,163	ATG2B	hsa_circ_0002223	5820	762	0.893164	Thyroid	0.0304935	0.0174763	0.0133256	0.0280487	0.0142709	0.19718	0.0227806
chr14	103470264	103478525	-	3	96,84,92	CDC42BPB	hsa_circ_0000571	8261	272	0.962204	Esophagus	0.121594	0.0121845	0	0.0153901	0	0	0
chr19	5604593	5604947	-	2	113,150	SAFB2	hsa_circ_0000880	354	263	0.928028	Esophagus	0.494621	0.0931608	0.0139575	0.060715	0.0306059	0.0151533	0
chr19	8520288	8528570	+	4	170,53,8,94	HNRNPM	hsa_circ_0006382	8282	325	0.902967	Esophagus	0.405506	0.0666955	0.0262893	0.0700677	0.00618661	0.0528938	0.0139514
chr19	11526612	11527733	-	3	212,49,224	RGL3	hsa_circ_0006941	1121	485	0.951807	Thyroid	0	0	0.0441731	0	0.0448711	0.307942	0
chr19	22157530	22171711	-	3	79,96,127	ZNF208	hsa_circ_0109301	14181	302	0.851655	Esophagus	0.378391	0.0314891	0.0491428	0.107731	0.00618661	0.101273	0.0409723
chr19	33604672	33605325	+	2	137,167	GPATCH1	hsa_circ_0008287	653	304	0.953349	Esophagus	0.103065	0.0171702	0	0.011678	0	0	0
chr19	47767859	47768203	+	2	84,174	CCDC9	hsa_circ_0000944	344	258	0.880748	Esophagus	0.474702	0.0875269	0.0262893	0.125596	0.042111	0.029735	0.0283962
chr19	47919908	47920607	-	3	51,160,173	MEIS3	hsa_circ_0003449	699	384	0.852847	Brain	0.118732	0.17004	0	0.031399	0	0	0
chr18	18945987	18983955	+	6	110,166,198,177,177,123	GREB1L	hsa_circ_0003653	37968	951	0.918487	Thyroid	0	0.0452403	0	0.0133361	0.0143523	0.149114	0
chr18	21776088	21819346	-	3	76,157,163	OSBPL1A	hsa_circ_0108091	43258	396	0.907422	Brain	0.0191471	0.273215	0.0122857	0.0688684	0	0.0158726	0.0355878
chr18	29691716	29693823	+	2	166,116	RNF138	hsa_circ_0005729	2107	282	0.883037	Esophagus	0.42931	0.0840127	0.0279151	0.106689	0.0400646	0.0269705	0.0156284
chr18	54444012	54483375	+	4	99,119,124,114	WDR7	hsa_circ_0108683	39363	456	1	Brain	0	0.172394	0	0	0	0	0
chr18	59157634	59174793	+	5	398,295,120,168,188	CDH20	hsa_circ_0108742	17159	1169	1	Brain	0	0.320883	0	0	0	0	0
chr18	76953182	77037196	+	5	81,76,77,161,143	ATP9B	hsa_circ_0048012	84014	538	1	Brain	0	0.151521	0	0	0	0	0
chr18	76953182	77067234	+	7	81,76,77,161,143,113,249	ATP9B	hsa_circ_0048013	114052	900	1	Brain	0	0.205258	0	0	0	0	0
chr6	4891946	4892613	+	1	667	CDYL	hsa_circ_0008285	667	667	0.932212	Esophagus	1.23505	0.184134	0.0325663	0.110698	0.0411518	0.114061	0.01972
chr6	13228047	13230425	+	2	248,157	PHACTR1	hsa_circ_0002268	2378	405	0.913594	Brain	0	0.117458	0.0147244	0.0461703	0	0	0
chr6	13579682	13584457	+	2	159,150	SIRT5	hsa_circ_0007218	4775	309	0.862396	Esophagus	0.506063	0.0637053	0.0657233	0.105102	0.123412	0.0598769	0
chr6	44900389	45333038	-	9	111,108,113,76,140,91,87,85,101	SUPT3H	hsa_circ_0003724	432649	912	0.97401	Brain	0	0.137123	0	0	0	0.0213826	0
chr6	52935854	52941341	+	3	87,159,58	FBXO9	hsa_circ_0003700	5487	304	0.891462	Esophagus	0.121213	0.0409834	0	0.0303575	0	0.00759686	0
chr6	54013853	54067031	+	7	72,66,84,60,45,45,129	MLIP	hsa_circ_0131933	53178	501	1	Brain	0	0.116145	0	0	0	0	0
chr6	54013853	54095715	+	8	72,66,84,60,45,45,129,204	MLIP	hsa_circ_0131934	81862	705	1	Brain	0	0.317171	0	0	0	0	0
chr6	55360216	55406938	-	6	189,64,149,96,108,81	HMGCLL1	hsa_circ_0131944	46722	687	0.897707	Brain	0.00927269	0.521735	0.19717	0.0307802	0.0143523	0.054037	0.0146058
chr6	55378845	55406938	-	4	149,96,108,81	HMGCLL1	hsa_circ_0131947	28093	434	0.936614	Brain	0	0.243776	0.0666278	0	0.0137123	0.0123725	0
chr6	69703659	69772928	+	6	195,69,109,150,76,103	BAI3	hsa_circ_0132107	69269	702	0.96768	Brain	0	0.128936	0.0133256	0.011678	0	0	0
chr6	69723929	69785930	+	6	69,109,150,76,103,44	BAI3	hsa_circ_0076948	62001	551	0.967619	Brain	0.018578	0.908454	0.0491428	0.0596416	0.0140747	0	0.0350622
chr6	69758076	69785930	+	4	150,76,103,44	BAI3	hsa_circ_0076950	27854	373	0.985723	Brain	0	0.177196	0	0.0151788	0	0	0
chr6	69943181	69949118	+	3	127,104,103	BAI3	hsa_circ_0076952	5937	334	0.978753	Brain	0	0.952895	0.0577509	0.0413211	0	0	0.0224043
chr6	71442080	71483128	+	3	134,86,76	SMAP1	hsa_circ_0132185	41048	296	0.978402	Brain	0	0.106287	0	0.0137737	0	0	0
chr6	73005639	73043538	+	4	30,113,167,236	RIMS1	hsa_circ_0132246	37899	546	0.902516	Brain	0.111041	0.412333	0.039434	0.0758938	0	0	0.014807
chr6	73016960	73043538	+	3	113,167,236	RIMS1	hsa_circ_0132250	26578	516	1	Brain	0	0.774102	0	0	0	0	0
chr6	106696024	106756366	-	4	95,163,79,128	ATG5	hsa_circ_0130174	60342	465	0.891632	Brain	0	0.165936	0.0122857	0.0137737	0	0.0613478	0.0204861
chr6	109175427	109197553	+	3	261,172,208	ARMC2	hsa_circ_0130236	22126	641	0.937561	Brain	0	0.255374	0.0266511	0.0153901	0	0.0472706	0.00636083
chr6	111493897	111498868	+	2	145,454	SLC16A10	hsa_circ_0130335	4971	599	0.881202	Brain	0	0.107373	0	0	0.0287593	0.0477752	0
chr6	136698892	136710655	-	4	114,111,118,164	MAP7	hsa_circ_0130788	11763	507	1	Brain	0	0.11285	0	0	0	0	0
chr6	136704808	136710655	-	3	111,118,164	MAP7	hsa_circ_0077957	5847	393	0.977045	Brain	0.0176726	0.228684	0	0	0.0138235	0	0
chr6	136709530	136710655	-	2	118,164	MAP7	hsa_circ_0130789	1125	282	0.975781	Brain	0.0483119	0.33247	0	0	0	0	0
chr6	138655106	138656325	+	1	1219	KIAA1244	hsa_circ_0130824	1219	1219	0.944792	Brain	0	0.144024	0.0122857	0.0140244	0	0	0.0213971
chr6	146240483	146254314	-	9	144,226,63,174,143,108,93,89,122	SHPRH	hsa_circ_0078143	13831	1162	0.879488	Brain	0	0.187443	0.0262893	0.0233559	0	0.0656209	0.0202681
chr6	152949399	152949689	-	1	290	SYNE1	hsa_circ_0003068	290	290	1	Brain	0	0.276728	0	0	0	0	0
chr6	154520801	154544377	-	5	373,86,59,72,74	IPCEF1	hsa_circ_0131108	23576	664	0.987195	Thyroid	0	0.0193535	0	0.0133361	0.00618661	0.505996	0
chr6	158922709	158925210	+	1	2501	TULP4	hsa_circ_0002163	2501	2501	0.887505	Brain	0.0191302	0.309868	0.0133256	0.0934236	0.014431	0.0413699	0.027472
chr6	159128261	159146669	+	3	52,70,135	SYTL3	hsa_circ_0131220	18408	257	0.939411	Thyroid	0.00902904	0	0.0240419	0.0133361	0	0.127655	0
chr6	170846321	170858201	-	4	107,130,82,108	PSMB1	hsa_circ_0078784	11880	427	0.987447	Brain	0.0191302	1.01004	0	0.0420731	0	0	0.0148723
chr8	10065342	10177499	+	4	69,120,105,107	MSRA	hsa_circ_0002546	112157	401	0.984732	Brain	0	0.154246	0	0	0.0141299	0	0
chr8	15508205	15531345	+	4	118,141,141,90	TUSC3	hsa_circ_0006410	23140	490	0.952745	Brain	0.0202206	0.153692	0	0.0233559	0	0	0
chr8	17570722	17581342	-	3	39,135,162	MTUS1	hsa_circ_0083443	10620	336	0.871643	Esophagus	0.183221	0.019991	0.0121273	0.060715	0.0200462	0.0150096	0.013217
chr8	26439484	26441499	+	2	89,185	DPYSL2	hsa_circ_0005013	2015	274	1	Brain	0	0.227936	0	0	0	0	0
chr8	51415337	51465739	+	4	103,83,131,130	SNTG1	hsa_circ_0136699	50402	447	1	Brain	0	0.12942	0	0	0	0	0
chr8	62531536	62566219	-	11	42,45,57,42,33,48,57,33,129,75,93	ASPH	hsa_circ_0084606	34683	654	0.883329	Esophagus	0.233759	0.0783485	0	0.0298208	0.00724271	0.0347016	0.0135228
chr8	105080739	105161076	+	3	101,173,242	RIMS2	hsa_circ_0005114	80337	516	0.995155	Brain	0.0174268	1.03975	0	0	0	0.0127991	0
chr8	105105698	105161076	+	2	173,242	RIMS2	hsa_circ_0085302	55378	415	1	Brain	0	0.175183	0	0	0	0	0
chr8	109462051	109468159	+	4	114,65,86,58	EMC2	hsa_circ_0135459	6108	323	0.855977	Esophagus	0.284064	0.115802	0.0262893	0.0455363	0.0267548	0.0157062	0.0153815
chr8	113933855	113988377	-	4	125,88,78,312	CSMD3	hsa_circ_0135531	54522	603	1	Brain	0	0.109214	0	0	0	0	0
chr8	136533479	136594316	+	5	119,117,147,140,196	KHDRBS3	hsa_circ_0135839	60837	719	1	Brain	0	0.125339	0	0	0	0	0
chr8	136554896	136594316	+	4	117,147,140,196	KHDRBS3	hsa_circ_0006059	39420	600	1	Brain	0	0.148373	0	0	0	0	0
chr8	141745349	141762415	-	6	205,90,101,116,101,85	PTK2	hsa_circ_0004238	17066	698	0.855555	Brain	0.0404961	0.239498	0.0244667	0.0817457	0	0.0397423	0.0211153
chr8	141749116	141762415	-	5	90,101,116,101,85	PTK2	hsa_circ_0003171	13299	493	0.922441	Brain	0.135402	1.7725	0.0799534	0.22439	0.0364598	0.135578	0.21306
chr8	141799572	141889736	-	11	53,31,118,108,78,141,55,63,80,88,167	PTK2	hsa_circ_0135915	90164	982	0.915118	Brain	0	0.12048	0.0249839	0.0140244	0	0.0223513	0
chr21	27326903	27372497	-	7	100,129,159,75,134,57,168	APP	hsa_circ_0061339	45594	822	1	Brain	0	0.147809	0	0	0	0	0
chr21	32554737	32575328	-	4	225,87,82,105	TIAM1	hsa_circ_0061407	20591	499	0.878125	Brain	0.0308128	0.125932	0.0162832	0.011678	0.0200734	0.0068125	0.00642758
chr21	46548316	46554747	+	2	172,118	ADARB1	hsa_circ_0005037	6431	290	0.936129	Esophagus	0.193206	0.0243926	0.00832795	0.0413211	0	0	0
chrX	2871183	2876476	-	3	123,122,162	ARSE	hsa_circ_0004844	5293	407	0.961824	Liver	0	0	0	0	0.129879	0	0.0297495
chrX	6069035	6069812	-	1	777	NLGN4X	hsa_circ_0089842	777	777	0.990741	Brain	0	0.116553	0	0	0	0	0.0064752
chrX	32305645	32366645	-	6	173,195,183,153,138,123	DMD	hsa_circ_0140203	61000	965	0.887989	Brain	0.0186754	0.171498	0	0.0560974	0	0	0.0404854
chrX	110385323	110416309	+	6	101,154,38,132,166,64	PAK3	hsa_circ_0139566	30986	655	0.949342	Brain	0.0202784	0.703688	0.0121273	0.0298208	0	0.151657	0
chrX	134679347	134683730	+	5	150,90,184,129,164	DDX26B	hsa_circ_0139797	4383	717	0.94056	Brain	0.00940152	0.141034	0	0.0151788	0	0.0122939	0.0134243
chrY	21749095	21749393	+	1	298	TXLNG2P	hsa_circ_0009024	298	298	0.966271	Esophagus	0.524508	0.0144599	0	0.0350339	0.0566534	0	0
chr9	20715320	20770237	+	7	89,75,155,105,102,205,207	FOCAD	hsa_circ_0138458	54917	938	0.86086	Brain	0	0.193405	0.0131447	0.0156995	0	0.101361	0.0312567
chr9	20819794	20874806	+	8	105,102,131,127,135,51,84,127	FOCAD	hsa_circ_0003782	55012	862	0.891318	Brain	0.0184306	0.187313	0.0166559	0.0156995	0	0.0560577	0.0153012
chr9	21476897	21477291	-	2	137,124	MIR31HG	hsa_circ_0008599	394	261	0.901436	Brain	0.0495352	0.108248	0	0	0	0.014481	0
chr9	33948371	33953472	-	2	214,190	UBAP2	hsa_circ_0003496	5101	404	0.900058	Esophagus	0.101683	0.00655803	0.0132011	0.0266722	0	0.0145431	0
chr9	33960823	33973235	-	4	53,66,104,55	UBAP2	hsa_circ_0001850	12412	278	0.904681	Esophagus	0.129893	0.0382207	0	0.0298208	0	0.00624615	0
chr9	87317073	87342874	+	7	75,72,69,155,137,133,306	NTRK2	hsa_circ_0139143	25801	947	0.903757	Brain	0	0.13478	0	0	0	0.0778295	0
chr9	87317073	87367000	+	10	75,72,69,155,137,133,306,36,101,100	NTRK2	hsa_circ_0087374	49927	1184	0.911591	Brain	0	0.130107	0	0	0	0.0690156	0
chr9	88190229	88211364	-	8	161,177,132,130,181,154,145,88	AGTPBP1	hsa_circ_0005202	21135	1168	0.938762	Brain	0.0190391	0.329728	0.0363818	0.0298208	0	0.0228093	0.0131009
chr9	88190229	88248289	-	12	161,177,132,130,181,154,145,88,149,87,84,713	AGTPBP1	hsa_circ_0139171	58060	2201	0.954958	Brain	0.0180885	0.377681	0.0245714	0.0133361	0	0.0256806	0.0203919
chr9	88211276	88248289	-	5	88,149,87,84,713	AGTPBP1	hsa_circ_0007162	37013	1121	0.895101	Brain	0.0374161	0.433956	0.0961674	0.0266722	0.0133549	0.0589087	0.0406089
chr9	99220660	99228060	+	3	163,162,69	HABP4	hsa_circ_0087630	7400	394	0.955146	Brain	0.0399865	0.14858	0	0	0	0	0
chr9	103261046	103279053	+	4	110,130,27,97	TMEFF1	hsa_circ_0004425	18007	364	0.962379	Brain	0.0395581	0.67673	0	0.0350339	0	0.0650543	0.0131101
chr9	111954557	111962614	-	3	78,178,99	EPB41L4B	hsa_circ_0137676	8057	355	1	Brain	0	0.382251	0	0	0	0	0
chr9	114332370	114348445	-	5	119,109,156,118,168	PTGR1	hsa_circ_0008043	16075	670	0.923508	Liver	0.126877	0.0374499	0.0614285	0.0964158	1.01573	0.0689658	0.0750332
chr9	114341075	114348445	-	3	156,118,168	PTGR1	hsa_circ_0003731	7370	442	0.922974	Liver	0.120553	0.0168443	0.0148779	0.0474421	0.577925	0.0406011	0.0267738
chr9	123593608	123595734	-	3	129,114,145	PSMD5	hsa_circ_0088300	2126	388	0.895588	Brain	0.0383371	0.191116	0.0148546	0.0400083	0	0	0.0265292
chr9	124736287	124752049	-	3	116,96,576	TTLL11	hsa_circ_0088353	15762	788	0.919854	Brain	0	0.173526	0	0.0700677	0	0	0.0133766
chr9	126519981	126641300	-	4	120,50,44,71	DENND1A	hsa_circ_0002544	121319	285	0.871242	Brain	0.137053	0.39781	0.0132011	0.0826421	0.0282598	0.0308424	0.0153277
chr9	129154344	129184227	+	3	130,123,95	MVB12B	hsa_circ_0088614	29883	348	0.943768	Brain	0.0191353	0.356599	0.0266511	0.0350339	0.0266521	0.0128403	0
chr22	33376629	33402809	-	2	58,473	SYN3	hsa_circ_0062997	26180	531	1	Brain	0	0.163857	0	0	0	0	0
chr20	9538254	9547031	-	3	127,134,492	PAK7	hsa_circ_0115623	8777	753	1	Brain	0	0.105898	0	0	0	0	0
chr20	50255881	50307358	-	8	162,213,113,143,161,77,76,81	ATP9A	hsa_circ_0002991	51477	1026	0.966023	Brain	0	0.106997	0	0	0	0.00624615	0.0155668
chr20	57014000	57016139	+	2	81,177	VAPB	hsa_circ_0001173	2139	258	0.902371	Esophagus	0.323665	0.0254805	0.0298671	0.0470984	0.0143523	0.0574684	0.0153277
chr20	58342240	58349545	+	3	210,175,248	PHACTR3	hsa_circ_0115521	7305	633	0.985055	Brain	0	0.137009	0.0122857	0	0	0	0
chr7	5680784	5692141	-	2	223,98	RNF216	hsa_circ_0079284	11357	321	0.892342	Stomach	0.135641	0.0174763	0.0396034	0.754115	0.0196159	0.0363347	0.238447
chr7	8043537	8110761	+	5	152,87,117,153,211	GLCCI1	hsa_circ_0134778	67224	720	0.88819	Brain	0	0.485076	0.0133507	0.126219	0	0.154682	0.0311656
chr7	8257934	8275635	-	5	199,124,73,166,96	ICA1	hsa_circ_0079422	17701	658	0.907578	Brain	0.029649	0.578905	0.0595115	0.0316281	0.040612	0.105107	0.0545129
chr7	14613836	14712652	-	8	161,90,86,75,74,117,36,99	DGKB	hsa_circ_0133622	98816	738	0.988854	Brain	0	1.50551	0	0.0596416	0	0	0.0410434
chr7	14647058	14712652	-	5	75,74,117,36,99	DGKB	hsa_circ_0133628	65594	401	0.925689	Brain	0	0.270193	0	0.0910725	0	0	0.0293975
chr7	14712553	14758310	-	8	99,117,89,118,120,75,50,144	DGKB	hsa_circ_0079474	45757	812	0.961661	Brain	0	0.124193	0	0.0140244	0	0	0.0145445
chr7	14712553	14775819	-	9	99,117,89,118,120,75,50,144,154	DGKB	hsa_circ_0133639	63266	966	0.995709	Brain	0	0.544734	0	0.0140244	0	0	0
chr7	22306582	22357656	-	6	49,67,169,122,107,51	RAPGEF5	hsa_circ_0079557	51074	565	0.932767	Brain	0.0552917	0.315657	0	0.0153901	0.0273214	0	0.0293317
chr7	35050079	35058208	-	5	94,121,138,88,25	DPY19L1	hsa_circ_0134201	8129	466	0.888159	Brain	0.0214916	0.551389	0.0360628	0.0615604	0.0706799	0.101801	0.078411
chr7	43531673	43540921	+	4	106,97,84,110	HECW1	hsa_circ_0005017	9248	397	1	Brain	0	0.107676	0	0	0	0	0
chr7	77789341	77814987	-	4	249,193,92,42	MAGI2	hsa_circ_0134739	25646	576	1	Brain	0	0.476707	0	0	0	0	0
chr7	82763565	82764972	-	1	1407	PCLO	hsa_circ_0080941	1407	1407	0.986033	Brain	0.00902904	0.360514	0	0	0	0.0211831	0
chr7	84666204	84697600	-	6	145,70,115,143,129,94	SEMA3D	hsa_circ_0134893	31396	696	0.949116	Thyroid	0	0.019991	0.0325663	0.015814	0	0.223947	0
chr7	91924202	91948826	+	3	278,298,183	ANKIB1	hsa_circ_0001723	24624	759	0.890067	Brain	0.0395772	0.470119	0.0367	0.0790702	0.0145493	0.0744412	0.0657512
chr7	103801519	103844682	-	11	111,48,113,53,91,49,131,112,75,201,93	ORC5	hsa_circ_0132860	43163	1077	0.903343	Brain	0.0179163	0.116717	0.00832795	0.0133361	0	0.0281088	0
chr7	137237114	137294355	-	12	200,112,74,63,56,79,138,114,61,83,99,75	DGKI	hsa_circ_0133463	57241	1154	0.984342	Brain	0	0.146507	0	0	0	0.0137644	0
chr7	152480271	152522207	+	8	56,125,111,96,108,144,174,93	ACTR3B	hsa_circ_0005181	41936	907	0.949572	Brain	0	0.230735	0.0133507	0.0156995	0	0.0276622	0.0131009
chr7	156516805	156619438	-	12	67,91,74,78,77,81,73,65,69,127,104,140	LMBR1	hsa_circ_0004673	102633	1046	0.899038	Brain	0	0.194007	0.0441731	0.0137737	0.0148015	0.0298771	0.0148988
chr5	32135677	32143986	-	2	115,132	GOLPH3	hsa_circ_0001470	8309	247	0.865064	Esophagus	0.164494	0.00639155	0.0149336	0.0533444	0.0287045	0.0148289	0.0149742
chr5	43295853	43297268	-	2	166,165	HMGCS1	hsa_circ_0072391	1415	331	0.91672	Liver	0.129575	0.151535	0.108188	0.0701218	1.28091	0.117701	0.0629287
chr5	50055476	50093067	+	11	90,71,78,95,61,91,67,126,565,51,96	PARP8	hsa_circ_0072433	37591	1391	0.976491	Thyroid	0	0	0	0.0151788	0	0.107607	0
chr5	63496634	63513223	+	4	135,96,960,36	RNF180	hsa_circ_0129321	16589	1227	0.852646	Thyroid	0	0.0620925	0.0396034	0.0298208	0.00661421	0.156235	0
chr5	74130250	74137504	-	4	172,86,100,135	FAM169A	hsa_circ_0004405	7254	493	0.863788	Brain	0.0191302	0.275521	0	0.011678	0.0599039	0.128103	0.00636083
chr5	78734832	78752841	-	4	140,93,132,157	HOMER1	hsa_circ_0006916	18009	522	0.871154	Brain	0.181985	1.39617	0.0448007	0.284653	0.0219899	0.497558	0.0483546
chr5	79745409	79770649	+	10	123,156,225,83,105,148,81,163,106,168	ZFYVE16	hsa_circ_0129776	25240	1358	0.91974	Brain	0.0375257	0.297955	0.0131447	0.0298208	0.0143796	0.0348671	0.0137452
chr5	81605975	81608670	+	2	51,241	ATP6AP1L	hsa_circ_0073230	2695	292	0.93894	Brain	0.00878317	0.102547	0	0.0151788	0.0136072	0	0
chr5	82832825	82838087	+	1	5262	VCAN	hsa_circ_0073237	5262	5262	0.985776	Brain	0.0203944	0.93983	0.0144377	0.0307802	0	0	0.0145962
chr5	87577858	87588460	+	4	65,187,93,76	TMEM161B-AS1	hsa_circ_0129902	10602	421	0.881121	Brain	0.0190065	0.188464	0.0325663	0.011678	0.0207872	0.0223109	0.0280768
chr5	90059121	90074914	+	6	165,118,124,139,183,233	GPR98	hsa_circ_0073329	15793	962	0.898528	Brain	0	0.10378	0	0	0	0.0631845	0
chr5	94204037	94248681	-	9	120,75,102,103,103,94,187,131,171	MCTP1	hsa_circ_0005540	44644	1086	0.926727	Brain	0.018708	0.168746	0.0120209	0.0303575	0	0	0.0131009
chr5	107356625	107684231	-	4	77,131,108,132	FBXL17	hsa_circ_0073516	327606	448	1	Brain	0	0.151068	0	0	0	0	0
chr5	109049220	109110666	+	7	255,145,172,128,174,187,178	MAN2A1	hsa_circ_0127514	61446	1239	0.978835	Brain	0	0.10283	0	0	0	0.0130587	0
chr5	109049220	109125228	+	11	255,145,172,128,174,187,178,203,183,115,68	MAN2A1	hsa_circ_0073539	76008	1808	0.969144	Brain	0	0.503407	0	0.015814	0.00702819	0.054037	0.0163204
chr5	109049220	109159538	+	15	255,145,172,128,174,187,178,203,183,115,68,166,219,123,115	MAN2A1	hsa_circ_0073542	110318	2431	0.994336	Brain	0	0.181491	0	0	0	0.00616755	0
chr5	109103235	109125228	+	7	174,187,178,203,183,115,68	MAN2A1	hsa_circ_0127521	21993	1108	0.957213	Brain	0	0.731313	0.0480837	0.0303575	0.0139696	0.0802315	0.0150999
chr5	109103235	109159538	+	11	174,187,178,203,183,115,68,166,219,123,115	MAN2A1	hsa_circ_0127523	56303	1731	0.997805	Brain	0	0.465214	0	0	0	0.00612639	0
chr5	109940809	109963581	-	5	250,124,134,167,100	TMEM232	hsa_circ_0127556	22772	775	0.859215	Thyroid	0	0.0628268	0.0147244	0.0140244	0	0.126976	0.0156822
chr5	112102022	112137080	+	6	85,202,109,114,84,105	APC	hsa_circ_0073587	35058	699	0.968037	Brain	0.00940152	0.122151	0	0.0140244	0	0	0
chr5	113740134	113740553	+	1	419	KCNN2	hsa_circ_0127664	419	419	0.931794	Brain	0.0570984	2.59191	0.0660056	0.486684	0.238137	0	0.212782
chr5	127449903	127477673	+	8	76,96,140,111,109,128,85,152	SLC12A2	hsa_circ_0127819	27770	897	1	Brain	0	0.174819	0	0	0	0	0
chr5	129015456	129040084	+	5	158,154,136,205,153	ADAMTS19	hsa_circ_0073816	24628	806	1	Brain	0	0.115704	0	0	0	0	0
chr5	138979956	138994551	+	4	64,32,78,106	UBE2D2	hsa_circ_0005728	14595	280	0.923387	Esophagus	0.134323	0.0161024	0	0.015814	0	0.0153852	0.014444
chr5	146070690	146080705	-	3	113,166,98	PPP2R2B	hsa_circ_0128256	10015	377	0.981076	Brain	0	0.138773	0	0	0	0.0157569	0
chr5	147785819	147796767	+	6	138,94,131,171,143,211	FBXO38	hsa_circ_0128310	10948	888	1	Brain	0	0.120191	0	0	0	0	0
chr5	160757889	160763776	-	3	245,153,138	GABRB2	hsa_circ_0128482	5887	536	0.979285	Brain	0	0.31855	0.0279151	0.011678	0	0	0
chr3	27420739	27465643	-	17	108,98,132,174,69,252,162,114,162,106,246,134,175,107,147,88,116	SLC4A7	hsa_circ_0064615	44904	2390	1	Brain	0	0.549775	0	0	0	0	0
chr3	56600621	56601081	+	2	166,104	CCDC66	hsa_circ_0001312	460	270	0.863294	Esophagus	0.114812	0.02938	0.00832795	0.0298208	0.0142307	0.0124137	0
chr3	72881519	72893574	-	4	113,155,123,65	SHQ1	hsa_circ_0002006	12055	456	0.863363	Brain	0	0.151599	0.0133256	0.0420731	0	0.0275215	0.0413643
chr3	108366789	108391503	+	8	170,45,26,166,96,128,69,97	DZIP3	hsa_circ_0121427	24714	797	0.960207	Brain	0	0.107676	0	0.0133361	0	0.0123725	0
chr3	120871323	120959354	+	7	84,124,79,155,73,148,68	STXBP5L	hsa_circ_0121595	88031	731	0.992924	Brain	0	0.172937	0	0	0	0.0073417	0
chr3	121097562	121100379	+	2	171,240	STXBP5L	hsa_circ_0121603	2817	411	0.955458	Brain	0	0.296009	0	0	0	0.0791098	0
chr3	127980970	127983624	+	2	97,165	EEFSEC	hsa_circ_0008759	2654	262	0.865025	Esophagus	0.101709	0.0211947	0.00832795	0.0400083	0.00667077	0.00616755	0
chr3	150834124	150845771	+	3	105,192,160	MED12L	hsa_circ_0067735	11647	457	0.968284	Brain	0	0.651631	0	0.0455363	0	0.0721057	0.00636083
chr3	169863210	169867032	-	2	99,159	PHC3	hsa_circ_0001360	3822	258	0.965164	Esophagus	0.243177	0.0356497	0	0.0151788	0	0	0
chr3	170875248	170912424	-	8	205,67,176,79,55,131,91,111	TNIK	hsa_circ_0067946	37176	915	0.978062	Brain	0	0.101315	0	0.0133361	0	0	0
chr3	179576849	179597911	-	4	96,97,124,195	PEX5L	hsa_circ_0122853	21062	512	1	Brain	0	0.170785	0	0	0	0	0
chr3	182923663	182925611	-	3	79,93,216	MCF2L2	hsa_circ_0122934	1948	388	0.963647	Brain	0.0176726	0.206411	0.0133256	0.0140244	0	0	0
chr3	183056587	183107567	-	4	120,91,115,84	MCF2L2	hsa_circ_0068161	50980	410	1	Brain	0	0.156689	0	0	0	0	0
chr3	183368083	183390272	+	5	981,185,119,189,189	KLHL24	hsa_circ_0006667	22189	1663	0.881079	Brain	0.0285475	0.63776	0.0788679	0.0784974	0.0203821	0.143691	0.105072
chr3	196214269	196215554	-	2	180,77	RNF168	hsa_circ_0123217	1285	257	0.930493	Esophagus	0.106036	0.0166739	0	0.0275474	0	0	0
chr3	196802707	196846401	-	7	34,67,177,115,103,157,121	DLG1	hsa_circ_0123239	43694	774	1	Brain	0	0.100643	0	0	0	0	0
chr3	196842797	196846401	-	2	157,121	DLG1	hsa_circ_0001383	3604	278	0.869179	Esophagus	0.114001	0	0.0149336	0.0303575	0.0155156	0.0155659	0.0131101
chr2	7154584	7170346	+	5	105,61,208,148,90	RNF144A	hsa_circ_0052490	15762	612	0.898777	Brain	0.00940152	0.111512	0.0148779	0.0153901	0.00668409	0.00612639	0.0152459
chr2	15629017	15651474	-	3	129,69,139	NBAS	hsa_circ_0000978	22457	337	0.912796	Esophagus	0.103142	0.0191873	0.0148546	0.0137737	0.00615099	0	0
chr2	24181170	24207701	+	6	55,117,139,107,138,159	UBXN2A	hsa_circ_0052967	26531	715	0.879122	Esophagus	0.195141	0.0431588	0.0298671	0.0316281	0	0.022924	0.0139514
chr2	40366540	40405633	-	6	276,100,131,18,104,107	SLC8A1	hsa_circ_0120050	39093	736	0.990511	Brain	0	0.519585	0	0.0233559	0	0	0.00622491
chr2	50692579	50733755	-	5	120,174,191,382,123	NRXN1	hsa_circ_0120250	41176	990	0.95666	Brain	0	0.115562	0	0.015814	0	0	0.014237
chr2	50692579	50758568	-	7	120,174,191,382,123,27,204	NRXN1	hsa_circ_0120251	65989	1221	1	Brain	0	0.101079	0	0	0	0	0
chr2	55252221	55255356	-	2	2400,57	RTN4	hsa_circ_0054598	3135	2457	0.967981	Brain	0.0293159	1.0023	0.0249839	0.060715	0	0.0283739	0.0491644
chr2	55559701	55562300	-	2	128,1071	CCDC88A	hsa_circ_0054618	2599	1199	0.905756	Brain	0.0203892	0.160064	0	0.0701218	0	0	0
chr2	58275961	58316858	+	6	141,50,70,88,106,93	VRK2	hsa_circ_0120478	40897	548	1	Brain	0	0.225988	0	0	0	0	0
chr2	64083439	64085070	+	2	128,108	UGP2	hsa_circ_0001020	1631	236	0.885584	Liver	0.122304	0.0656084	0.135143	0.134194	1.02434	0.101801	0.144161
chr2	89100615	89104394	+	1	3779	ANKRD36BP2	hsa_circ_0121140	3779	3779	0.86558	Stomach	0.069707	0.0228715	0.0120209	0.215462	0.014037	0.00762752	0.0475099
chr2	107446521	107460490	-	4	175,102,98,1000	ST6GAL2	hsa_circ_0055954	13969	1375	0.919715	Brain	0	0.304013	0	0	0	0.146445	0
chr2	116066814	116101488	+	2	115,96	DPP10	hsa_circ_0117102	34674	211	0.984925	Brain	0	0.160802	0	0	0	0	0.0145445
chr2	124979281	124999970	+	2	105,194	CNTNAP5	hsa_circ_0117236	20689	299	1	Brain	0	0.1049	0	0	0	0	0
chr2	125530375	125555897	+	3	219,240,225	CNTNAP5	hsa_circ_0117248	25522	684	1	Brain	0	0.136474	0	0	0	0	0
chr2	136389287	136437894	+	12	60,141,109,96,38,51,227,149,303,124,155,152	R3HDM1	hsa_circ_0056567	48607	1605	0.955609	Brain	0	0.131265	0.0133256	0.0153901	0	0.00624615	0
chr2	148730307	148733544	-	3	91,77,74	ORC4	hsa_circ_0001074	3237	242	0.89652	Esophagus	0.101709	0	0	0.0233559	0.0128008	0.0141563	0.012836
chr2	152698416	152717334	-	4	186,96,152,110	CACNB4	hsa_circ_0056731	18918	544	0.986885	Brain	0	0.188931	0	0	0	0.0148675	0
chr2	154757448	154801152	+	2	72,246	GALNT13	hsa_circ_0117700	43704	318	1	Brain	0	0.188743	0	0	0	0	0
chr2	162804075	162821683	+	7	162,114,162,252,69,174,123	SLC4A10	hsa_circ_0117841	17608	1056	1	Brain	0	0.149995	0	0	0	0	0
chr2	163360952	163374668	-	3	215,21,429	KCNH7	hsa_circ_0117881	13716	665	1	Brain	0	0.158804	0	0	0	0	0
chr2	168986050	168997268	-	5	66,49,134,102,110	STK39	hsa_circ_0003296	11218	461	0.924263	Esophagus	0.107034	0.0210911	0	0.0275474	0	0	0
chr2	170871790	170917953	+	6	86,103,104,125,108,126	UBR3	hsa_circ_0003920	46163	652	0.856887	Brain	0.0193173	0.106872	0.0147244	0.0266722	0	0.0157569	0.0152981
chr2	180815238	180815653	-	2	221,102	CWC22	hsa_circ_0118236	415	323	1	Brain	0	0.165399	0	0	0	0	0
chr2	187604954	187618776	+	5	234,93,159,171,117	FAM171B	hsa_circ_0057328	13822	774	0.988253	Brain	0	0.195419	0	0.0137737	0	0	0
chr2	196544755	196583056	+	7	1019,208,170,189,121,369,81	SLC39A10	hsa_circ_0057552	38301	2157	0.867147	Thyroid	0	0.130028	0.0148779	0	0	0.181788	0
chr2	200173482	200246543	-	7	198,156,213,473,103,124,127	SATB2	hsa_circ_0006011	73061	1394	0.9817	Brain	0	0.344002	0	0	0	0	0.0377718
chr2	200188525	200246543	-	6	156,213,473,103,124,127	SATB2	hsa_circ_0057687	58018	1196	0.956237	Brain	0	0.241558	0	0	0	0	0.0634273
chr2	200188525	200298237	-	7	156,213,473,103,124,127,177	SATB2	hsa_circ_0008265	109712	1373	0.958685	Brain	0	0.2364	0	0.0133361	0	0	0.0452656
chr2	200213423	200298237	-	5	473,103,124,127,177	SATB2	hsa_circ_0008928	84814	1004	0.96326	Brain	0	0.54944	0	0	0	0.0148675	0.106253
chr2	200233327	200298237	-	4	103,124,127,177	SATB2	hsa_circ_0003915	64910	531	0.929523	Brain	0.0406126	0.387059	0	0.015814	0.0142034	0.0138741	0.0791675
chr2	200245086	200298237	-	3	124,127,177	SATB2	hsa_circ_0002867	53151	428	1	Brain	0	0.177359	0	0	0	0	0
chr2	221495099	221498849	+	3	182,151,197	AC067956.1	hsa_circ_0119190	3750	530	0.93631	Brain	0	0.112397	0	0	0	0.0429512	0
chr2	228881121	228884872	-	1	3751	SPHKAP	hsa_circ_0119274	3751	3751	1	Brain	0	0.222385	0	0	0	0	0
chr2	236649606	236659132	+	3	86,142,135	AGAP1	hsa_circ_0005003	9526	363	0.933444	Brain	0.0201573	0.269256	0	0.0615604	0	0	0.0258056
chr1	8568685	8617582	-	4	49,105,97,106	RERE	hsa_circ_0005829	48897	357	0.859652	Brain	0.0384107	0.385221	0.0262893	0.0964158	0	0.0877733	0.0755004
chr1	8601272	8617582	-	3	105,97,106	RERE	hsa_circ_0002158	16310	308	0.859854	Brain	0.320335	1.76432	0.157736	0.470541	0.0752572	0.223941	0.235761
chr1	14042035	14068652	+	4	74,118,77,153	PRDM2	hsa_circ_0010028	26617	422	0.877982	Esophagus	0.101866	0.0162634	0.0121273	0.0307802	0	0.015406	0
chr1	21220009	21268823	-	5	120,134,247,89,840	EIF4G3	hsa_circ_0010467	48814	1430	0.941684	Brain	0.0191302	0.400463	0.0133507	0.0275474	0	0.067096	0.0129957
chr1	21231375	21268823	-	2	89,840	EIF4G3	hsa_circ_0111887	37448	929	0.87151	Brain	0.0407785	0.14558	0.0148546	0.0151788	0	0.0275215	0.0138997
chr1	23376879	23385660	+	6	134,79,93,107,82,95	KDM1A	hsa_circ_0003889	8781	590	0.91451	Brain	0.0195971	0.147487	0.0166559	0.0266722	0	0.012727	0
chr1	24840803	24841057	+	1	254	RCAN3	hsa_circ_0003553	254	254	0.975632	Esophagus	0.196684	0	0	0.0133361	0	0.0154212	0
chr1	39900085	39905172	+	5	219,204,9,232,227	MACF1	hsa_circ_0005788	5087	891	0.876199	Lung	0	0.0173467	0.145212	0.015814	0.0137123	0.029735	0.0312567
chr1	42946131	42964587	+	5	106,154,72,116,99	CCDC30	hsa_circ_0113387	18456	547	0.936846	Brain	0	0.101224	0.0120209	0	0	0.0263353	0
chr1	44877652	44878394	+	1	742	RNF220	hsa_circ_0012152	742	742	0.97709	Brain	0	0.497721	0.0133256	0.0151788	0	0.0259601	0.0139514
chr1	54059780	54065951	-	2	883,178	GLIS1	hsa_circ_0002079	6171	1061	1	Brain	0	0.16201	0	0	0	0	0
chr1	65830317	65831879	+	3	151,50,149	DNAJC6	hsa_circ_0002454	1562	350	0.954672	Brain	0.0703365	0.985866	0.0746678	0.0615604	0	0.0345078	0.0270542
chr1	66378927	66384518	+	2	112,239	PDE4B	hsa_circ_0008433	5591	351	0.89409	Brain	0.0405257	0.789864	0.126272	0.060715	0.19023	0.0214535	0.0627288
chr1	70518708	70573509	+	4	120,222,93,75	LRRC7	hsa_circ_0114014	54801	510	1	Brain	0	0.133176	0	0	0	0	0
chr1	84644859	84650865	+	4	62,129,99,83	PRKACB	hsa_circ_0114304	6006	373	1	Brain	0	0.103497	0	0	0	0	0
chr1	84644859	84663507	+	6	62,129,99,83,127,96	PRKACB	hsa_circ_0114305	18648	596	0.925355	Brain	0.0201573	0.218784	0.0149336	0.0307802	0.00615099	0.0195365	0.00642758
chr1	91840914	91851391	-	9	89,201,159,78,152,133,71,48,260	HFM1	hsa_circ_0114450	10477	1191	0.890069	Thyroid	0	0.00639155	0.0399767	0.0307802	0	0.127988	0.00727022
chr1	99418625	99422297	-	2	251,133	LPPR5	hsa_circ_0013270	3672	384	1	Brain	0	0.154056	0	0	0	0	0
chr1	101379218	101440458	+	6	144,51,136,91,150,93	SLC30A7	hsa_circ_0110181	61240	665	1	Brain	0	0.159096	0	0	0	0	0
chr1	107866903	107867544	+	1	641	NTNG1	hsa_circ_0002286	641	641	0.864611	Lung	0	0.087583	0.144591	0.0140244	0	0	0.0158487
chr1	109439485	109446876	+	8	222,136,143,124,116,156,109,130	GPSM2	hsa_circ_0013390	7391	1136	0.977357	Brain	0	0.105051	0	0	0	0	0.0142723
chr1	117944807	117948267	+	2	256,97	MAN1A2	hsa_circ_0000116	3460	353	0.97405	Esophagus	0.332146	0	0	0.031399	0	0.0203171	0
chr1	144994590	145021167	-	3	111,152,56	PDE4DIP	hsa_circ_0008390	26577	319	0.982053	Brain	0	0.291589	0	0.031399	0	0	0
chr1	172356272	172357949	+	2	227,237	DNM3	hsa_circ_0111165	1677	464	1	Brain	0	0.198762	0	0	0	0	0
chr1	181546901	181549912	+	3	104,153,182	CACNA1E	hsa_circ_0015537	3011	439	1	Brain	0	0.117793	0	0	0	0	0
chr1	204970297	204971876	+	2	117,153	NFASC	hsa_circ_0111758	1579	270	0.951426	Brain	0.030291	0.197951	0	0.0140244	0	0	0.0133766
chr1	211192205	211264032	-	3	393,119,129	KCNH1	hsa_circ_0111832	71827	641	1	Brain	0	0.318959	0	0	0	0	0
chr1	211256121	211280719	-	4	119,129,107,124	KCNH1	hsa_circ_0016351	24598	479	1	Brain	0	0.258992	0	0	0	0	0
chr1	213251037	213303232	+	4	121,116,94,363	RPS6KC1	hsa_circ_0005841	52195	694	0.86787	Brain	0.00864359	0.189875	0.0363818	0.0153901	0.0142373	0.0539349	0.0219414
chr1	213251037	213341316	+	5	121,116,94,363,116	RPS6KC1	hsa_circ_0111924	90279	810	1	Brain	0	0.108356	0	0	0	0	0
chr1	213251037	213349835	+	6	121,116,94,363,116,93	RPS6KC1	hsa_circ_0111925	98798	903	1	Brain	0	0.152045	0	0	0	0	0
chr1	213302869	213349835	+	3	363,116,93	RPS6KC1	hsa_circ_0007772	46966	572	0.891931	Brain	0.00878317	0.234219	0.0264023	0.0275474	0.0136607	0.0491775	0.0263005
chr1	214169811	214185058	+	3	1792,108,195	PROX1	hsa_circ_0111952	15247	2095	0.933417	Liver	0	0.0469803	0.0133507	0.0140244	0.502735	0.126488	0
chr1	220771672	220792097	+	6	49,66,71,57,237,120	MARK1	hsa_circ_0112073	20425	600	1	Brain	0	0.124167	0	0	0	0	0
chr1	225140371	225195246	+	9	110,140,150,131,153,116,63,145,132	DNAH14	hsa_circ_0016601	54875	1140	0.86188	Thyroid	0.0495221	0.0240635	0.0499677	0.0275474	0.058717	0.303097	0.0413643
chr1	227381486	227441856	-	4	149,96,84,92	CDC42BPA	hsa_circ_0016754	60370	421	0.916818	Brain	0.0295838	0.101508	0	0.0149104	0	0.00616755	0
chr1	233270758	233372726	-	13	178,142,151,93,97,110,92,111,172,33,154,146,136	PCNXL2	hsa_circ_0016958	101968	1615	0.983863	Brain	0	0.322753	0	0.015814	0	0.0154358	0
chr1	233296028	233344435	-	7	151,93,97,110,92,111,172	PCNXL2	hsa_circ_0006635	48407	826	0.912569	Brain	0.0187068	0.125223	0	0	0	0.0469835	0
chr1	233296028	233372726	-	11	151,93,97,110,92,111,172,33,154,146,136	PCNXL2	hsa_circ_0016962	76698	1295	0.969675	Brain	0	0.221842	0	0.0149104	0	0.0254539	0
chr1	233334684	233372726	-	7	92,111,172,33,154,146,136	PCNXL2	hsa_circ_0000198	38042	844	0.922501	Brain	0.0406309	0.623428	0.0297558	0.0420731	0.0139696	0.142428	0.0210343
chr1	233334684	233388534	-	10	92,111,172,33,154,146,136,94,146,148	PCNXL2	hsa_circ_0006881	53850	1232	0.969971	Brain	0	0.168608	0	0	0	0.0303788	0
chr1	240341220	240374535	+	4	148,56,1934,145	FMN2	hsa_circ_0017181	33315	2283	0.97679	Brain	0	0.137009	0	0	0	0	0.0190801
chr1	240351506	240421332	+	4	56,1934,145,88	FMN2	hsa_circ_0112703	69826	2223	1	Brain	0	0.147856	0	0	0	0	0
chr1	240370098	240374535	+	2	1934,145	FMN2	hsa_circ_0005180	4437	2079	0.902355	Brain	0	0.12252	0	0.0233559	0	0	0.0484249
chr1	240370098	240421332	+	3	1934,145,88	FMN2	hsa_circ_0112705	51234	2167	0.939545	Brain	0	0.493828	0	0.0769506	0	0	0.102175
chr1	240370098	240458183	+	4	1934,145,88,62	FMN2	hsa_circ_0017184	88085	2229	0.97382	Brain	0	1.99923	0	0.0560974	0	0	0.25794
chr1	243327585	243388623	-	12	1833,127,150,294,164,477,135,163,59,79,90,146	CEP170	hsa_circ_0017227	61038	3717	0.977255	Thyroid	0	0.0246252	0	0	0	0.180445	0
chr1	243579003	243589860	+	3	128,109,132	SDCCAG8	hsa_circ_0017241	10857	369	0.896835	Esophagus	0.129878	0.0651691	0	0	0	0.0152244	0
chr1	243708811	244006584	-	11	88,215,129,123,69,66,132,145,112,126,158	AKT3	hsa_circ_0017242	297773	1363	0.956001	Brain	0.0665061	1.34706	0.0528045	0.106689	0.0133638	0.103669	0.0125857
chr1	243727021	243859018	-	8	129,123,69,66,132,145,112,126	AKT3	hsa_circ_0017243	131997	902	0.956838	Brain	0	0.11805	0	0.0149104	0	0.0156612	0
chr1	243727021	244006584	-	9	129,123,69,66,132,145,112,126,158	AKT3	hsa_circ_0017244	279563	1060	0.941261	Brain	0.0285475	0.287077	0.0240419	0.015814	0	0.0327726	0
chr1	243736227	244006584	-	8	123,69,66,132,145,112,126,158	AKT3	hsa_circ_0017248	270357	931	0.936803	Brain	0.0176726	0.320705	0.0133507	0.0467118	0	0.0438712	0
chr1	243776972	243859018	-	6	69,66,132,145,112,126	AKT3	hsa_circ_0017251	82046	650	0.898113	Brain	0.0361769	0.474763	0.0660056	0.0413211	0	0.124928	0.0218025
chr1	243776972	244006584	-	7	69,66,132,145,112,126,158	AKT3	hsa_circ_0017252	229612	808	0.889495	Brain	0.0812618	1.00259	0.113982	0.126219	0.0261482	0.264271	0.0528679
chr4	2986239	3031136	+	11	96,113,78,104,93,64,141,191,38,90,209	GRK4	hsa_circ_0126142	44897	1217	0.983025	Brain	0	0.145599	0	0	0	0.0148289	0
chr4	36212011	36216102	-	4	354,92,77,59	ARAP2	hsa_circ_0069396	4091	582	0.87882	Thyroid	0.00991578	0.0359188	0.0279151	0	0.0137173	0.120299	0
chr4	39328182	39329376	-	2	78,233	RFC1	hsa_circ_0001403	1194	311	0.87393	Esophagus	0.129414	0.03943	0	0.0298208	0.0139136	0.0147272	0
chr4	42487512	42526864	-	5	173,65,139,140,85	ATP8A1	hsa_circ_0069608	39352	602	0.88826	Thyroid	0	0.100702	0.0120209	0	0	0.178976	0.00727022
chr4	42505466	42526864	-	4	65,139,140,85	ATP8A1	hsa_circ_0069612	21398	429	0.884535	Thyroid	0	0.0601587	0.0148546	0.0316281	0	0.163892	0.00690139
chr4	42505466	42546003	-	5	65,139,140,85,70	ATP8A1	hsa_circ_0069613	40537	499	0.895435	Thyroid	0	0.117486	0.0264023	0.0140244	0	0.271757	0.0125857
chr4	54280781	54294350	+	3	108,94,157	FIP1L1	hsa_circ_0007476	13569	359	0.903358	Esophagus	0.29408	0.0835672	0.0267015	0.0307802	0	0.0294741	0
chr4	68594257	68598063	+	3	147,97,840	UBA6-AS1	hsa_circ_0126851	3806	1084	0.989899	Brain	0	0.103061	0	0	0	0.00624615	0
chr4	77917577	77952123	+	8	115,196,187,162,97,169,133,188	SEPT11	hsa_circ_0070057	34546	1247	0.93808	Brain	0.0183017	0.151457	0.0262893	0.011678	0	0	0
chr4	106848492	106863859	+	6	93,120,120,135,123,396	NPNT	hsa_circ_0124952	15367	987	0.950411	Thyroid	0	0	0.0588975	0.0140244	0	0.245087	0
chr4	118974910	119064839	+	5	1136,88,155,186,129	NDST3	hsa_circ_0125143	89929	1694	1	Brain	0	0.111724	0	0	0	0	0
chr4	119026172	119064839	+	4	88,155,186,129	NDST3	hsa_circ_0125149	38667	558	0.987559	Brain	0	0.382787	0	0	0.0285734	0	0
chr4	128995614	128999117	+	3	59,60,175	LARP1B	hsa_circ_0001438	3503	294	0.864445	Esophagus	0.301459	0.0547604	0.0133256	0.0550948	0.0653895	0.0436292	0.0129866
chr4	144464661	144465125	+	2	149,120	SMARCA5	hsa_circ_0001445	464	269	0.943567	Esophagus	2.03682	0.415946	0.0614285	0.0941969	0.0157531	0.0579144	0.0444209
chr4	151388824	151412187	-	4	113,116,103,118	LRBA	hsa_circ_0006867	23363	450	0.943766	Intestine	0.240086	0.0151036	0.0148779	0.615604	0.0599475	0.0668118	3.00064
chr4	177070957	177073118	+	4	150,131,126,156	WDR17	hsa_circ_0125846	2161	563	0.985096	Brain	0	0.130593	0	0.011678	0	0	0
chr4	183522076	183550042	+	2	238,239	TENM3	hsa_circ_0071480	27966	477	0.959952	Brain	0	0.159879	0	0	0	0.0384167	0
chr4	183522076	183575046	+	3	238,239,123	TENM3	hsa_circ_0125881	52970	600	0.976848	Brain	0	0.668584	0.0240419	0.011678	0	0.0436292	0.0135271
chr13	75900332	75923438	-	6	227,75,120,111,92,133	TBC1D4	hsa_circ_0002917	23106	758	0.899933	Thyroid	0	0.01263	0.0325663	0.0153901	0.0150116	0.148458	0.0135363
chr11	1307231	1317024	-	4	91,153,183,150	TOLLIP	hsa_circ_0008301	9793	577	0.95295	Liver	0.0201573	0	0	0.0156995	0.175959	0.0073417	0.0064752
chr11	30516842	30602041	-	3	226,182,249	MPPED2	hsa_circ_0021550	85199	657	1	Thyroid	0	0	0	0	0	0.167078	0
chr10	34558584	34573173	-	2	243,111	PARD3	hsa_circ_0018168	14589	354	0.886987	Esophagus	0.402897	0.0146846	0.0416398	0.0894624	0.0433667	0.0666387	0.0174038
chr17	953289	1003975	-	14	132,98,75,105,76,123,166,122,141,53,61,108,186,99	ABR	hsa_circ_0007919	50686	1545	0.972562	Intestine	0.0179163	0.0162634	0.0133507	0.0596416	0	0	0.650987
chr15	57730182	57754090	+	7	1617,95,106,102,149,136,213	CGNL1	hsa_circ_0035432	23908	2418	0.872662	Thyroid	0	0.0147012	0.0399767	0.0153901	0.0901367	0.209684	0
chr15	65471271	65472542	-	2	118,161	CLPX	hsa_circ_0004374	1271	279	0.966099	Esophagus	0.149655	0.0304408	0	0	0	0	0
chr15	76580186	76585041	-	3	100,83,82	ETFA	hsa_circ_0000639	4855	265	0.863245	Esophagus	0.101972	0	0	0.0133361	0.042111	0.0154358	0.0127884
chr14	35331249	35331528	-	1	279	BAZ1A	hsa_circ_0006137	279	279	0.928668	Esophagus	0.17847	0	0.0249839	0.0156995	0.00618661	0.0145431	0.0149709
chr14	80163972	80271542	+	2	308,88	NRXN3	hsa_circ_0032813	107570	396	0.879414	Stomach	0.0203732	0	0	0.106251	0	0	0.0565012
chr6	144858717	144860579	+	2	136,150	UTRN	hsa_circ_0001647	1862	286	0.923557	Esophagus	0.106701	0	0.0147244	0.0137737	0	0.0204409	0
chr8	71126137	71128999	-	2	173,105	NCOA2	hsa_circ_0137069	2862	278	0.944305	Esophagus	0.396301	0.0302072	0.0162832	0.0413211	0.0311354	0.0134852	0
chrX	10031484	10035530	+	2	110,204	WWC3	hsa_circ_0007685	4046	314	0.928832	Esophagus	0.120944	0	0.0122857	0.0266722	0	0.0126858	0
chr9	4117767	4125941	-	2	1114,208	GLIS3	hsa_circ_0007368	8174	1322	0.854186	Thyroid	0	0.0360401	0.0294487	0.0627979	0.0621171	0.249205	0.0276216
chr7	84685032	84697600	-	3	143,129,94	SEMA3D	hsa_circ_0080947	12568	366	0.955582	Thyroid	0	0.0135479	0.0131447	0.0153901	0	0.157904	0
chr5	50045984	50093067	+	12	38,90,71,78,95,61,91,67,126,565,51,96	PARP8	hsa_circ_0072431	47083	1429	0.915536	Thyroid	0	0	0.0242545	0.0275474	0.013285	0.157649	0.014807
chr3	188925164	188956698	+	3	219,92,177	TPRG1	hsa_circ_0123090	31534	488	0.977355	Liver	0	0	0.0267015	0	0.196518	0	0
chr3	197541778	197547301	+	3	145,127,106	LRCH3	hsa_circ_0002266	5523	378	0.890343	Esophagus	0.18303	0.0502306	0.0162832	0.0400083	0	0.0139011	0
chr2	26486247	26500028	+	4	100,45,100,88	HADHB	hsa_circ_0008257	13781	333	0.963413	Esophagus	0.171903	0.0143804	0	0.0233559	0	0	0
chr2	99786012	99787892	-	3	61,116,87	MITD1	hsa_circ_0001050	1880	264	0.983289	Esophagus	0.171352	0.0171804	0	0	0	0	0
chr2	238647874	238668848	+	9	78,36,126,72,171,93,93,93,142	LRRFIP1	hsa_circ_0119391	20974	904	0.910093	Stomach	0.0363694	0	0	0.140135	0	0	0.0392255
chr1	85331067	85331821	-	1	754	LPAR3	hsa_circ_0004390	754	754	0.903413	Esophagus	0.370889	0	0.163401	0.0137737	0	0	0.0377631
chr12	56094682	56094938	-	1	256	ITGA7	hsa_circ_0026782	256	256	0.85271	Esophagus	1.44685	0	0	0.402581	0	0	0.876057
chr11	85733409	85742653	-	3	103,76,143	PICALM	hsa_circ_0023942	9244	322	0.975186	Esophagus	0.314521	0.0157067	0	0.0156995	0	0.0154212	0
chr10	17746429	17747740	+	3	88,55,154	STAM	hsa_circ_0008311	1311	297	0.983601	Esophagus	0.151423	0.0148996	0	0	0	0	0
chr10	105767934	105778666	+	3	180,130,125	SLK	hsa_circ_0000259	10732	435	1	Esophagus	0.260986	0	0	0	0	0	0
chr16	85667519	85667738	+	1	219	GSE1	hsa_circ_0000722	219	219	0.984655	Esophagus	0.128873	0.0118653	0	0	0	0	0
chr18	8076452	8114825	+	5	110,202,103,274,37	PTPRM	hsa_circ_0003063	38373	726	0.934739	Thyroid	0	0	0.0288755	0.0151788	0	0.129045	0.0064752
chr6	71136141	71162274	+	3	94,116,80	FAM135A	hsa_circ_0132161	26133	290	0.907689	Esophagus	0.197831	0.0258134	0	0.0700677	0	0	0.0136908
chr8	68044185	68049838	+	2	130,148	CSPP1	hsa_circ_0003388	5653	278	0.991015	Esophagus	0.101532	0.0054737	0	0	0	0	0
chrX	10534927	10535643	-	1	716	MID1	hsa_circ_0007933	716	716	0.85092	Intestine	0	0	0.0144377	0.0700677	0.00661421	0.0266555	0.131669
chrX	32235032	32328393	-	3	148,173,195	DMD	hsa_circ_0140201	93361	516	0.923404	Stomach	0	0	0	0.123121	0	0	0.0565836
chr9	114337013	114348445	-	4	109,156,118,168	PTGR1	hsa_circ_0088030	11432	551	0.922837	Liver	0.153684	0.0305862	0.0267015	0.0701218	0.731857	0.0299384	0.0277994
chr22	45197956	45221473	+	5	88,132,87,99,111	ARHGAP8	hsa_circ_0063716	23517	517	0.960868	Thyroid	0	0	0.0162832	0	0	0.126488	0.0134151
chr7	40027197	40027857	+	1	660	CDK13	hsa_circ_0079929	660	660	0.955325	Esophagus	0.156504	0	0	0.0275474	0.0144037	0	0
chr5	132227855	132228810	-	2	241,89	AFF4	hsa_circ_0001529	955	330	0.977274	Esophagus	0.171286	0	0	0.0233559	0	0	0
chr2	43939363	43968182	+	7	159,81,180,109,113,180,98	PLEKHH2	hsa_circ_0120097	28819	920	0.923061	Lung	0.0191685	0.0140917	0.134402	0	0	0.0140144	0.0147698
chr2	188243666	188252483	-	7	92,113,111,133,87,165,91	CALCRL	hsa_circ_0118335	8817	792	0.922909	Lung	0.0191353	0.0212158	0.1468	0.011678	0	0.0158726	0
chr1	1158623	1159348	-	2	114,137	SDF4	hsa_circ_0000002	725	251	0.959784	Esophagus	0.205196	0.0228411	0	0.0266722	0	0	0
chr1	14057494	14068652	+	3	118,77,153	PRDM2	hsa_circ_0005986	11158	348	1	Esophagus	0.119795	0	0	0	0	0	0
chr13	21305979	21306260	-	1	281	N6AMT2	hsa_circ_0003285	281	281	0.918812	Esophagus	0.179275	0	0.0131447	0.0596416	0	0.0145431	0
chr12	124071293	124074996	+	2	193,108	TMED2	hsa_circ_0000458	3703	301	1	Esophagus	0.195053	0	0	0	0	0	0
chr10	91511102	91522592	+	6	126,125,156,177,111,198	KIF20B	hsa_circ_0019079	11490	893	0.97015	Esophagus	0.121291	0	0	0.0149104	0	0.0068125	0
chr15	44624185	44630515	+	3	91,145,81	CASC4	hsa_circ_0000596	6330	317	0.993037	Esophagus	0.151969	0.00634869	0	0	0	0	0
chr15	57743697	57754090	+	4	102,149,136,213	CGNL1	hsa_circ_0035435	10393	600	0.872528	Liver	0.0200338	0.0054737	0.0297092	0.0133361	0.160068	0.0538724	0
chr19	11230767	11231198	+	2	142,153	LDLR	hsa_circ_0006877	431	295	0.868574	Esophagus	0.100381	0.019991	0	0.0303575	0.0288073	0	0
chr9	123924133	123928458	+	4	116,218,158,74	CNTRL	hsa_circ_0088333	4325	566	0.942288	Esophagus	0.114039	0.0118653	0.0122333	0.0153901	0	0	0
chr3	133907680	133914026	-	3	87,126,101	RYK	hsa_circ_0005768	6346	314	0.954897	Esophagus	0.106768	0.0137144	0	0.0151788	0	0	0
chr2	106761645	106782539	-	5	181,61,44,64,28	UXS1	hsa_circ_0004029	20894	378	0.993165	Esophagus	0.123677	0.00507185	0	0	0	0	0
chr2	167304121	167328955	-	7	97,207,142,70,207,92,129	SCN7A	hsa_circ_0117954	24834	944	0.945867	Lung	0.0811155	0	1.45523	0.223656	0.0131097	0	0.154776
chr1	31465236	31468067	-	2	271,167	PUM1	hsa_circ_0000043	2831	438	0.852468	Esophagus	0.21077	0.0295282	0.0267015	0.0583898	0.0365729	0.0199987	0.0153815
chr16	9009110	9011013	-	4	91,81,55,131	USP7	hsa_circ_0005152	1903	358	0.935193	Esophagus	0.136408	0.0054737	0	0.0413211	0	0.00624615	0
chr12	114823280	114841741	-	6	92,153,148,120,95,185	TBX5	hsa_circ_0003176	18461	793	1	Lung	0	0	0.343472	0	0	0	0
chr14	31602443	31602881	-	2	177,167	HECTD1	hsa_circ_0031485	438	344	0.949366	Esophagus	0.103353	0	0	0.031399	0	0	0
chr20	34317233	34320057	-	3	54,66,195	RBM39	hsa_circ_0008817	2824	315	0.985694	Esophagus	0.136047	0	0	0.011678	0	0	0
chr2	64083439	64090062	+	3	128,108,88	UGP2	hsa_circ_0004227	6623	324	0.956036	Liver	0.0297843	0	0	0	0.112911	0	0
chr1	214169811	214178615	+	2	1792,108	PROX1	hsa_circ_0016436	8804	1900	1	Liver	0	0	0	0	0.113846	0	0
chr17	7402357	7402810	+	2	125,211	POLR2A	hsa_circ_0000741	453	336	0.943477	Esophagus	0.124184	0	0	0.0151788	0.013285	0.0136522	0
chr19	430683	440932	-	8	64,157,127,52,54,120,61,71	SHC2	hsa_circ_0109681	10249	706	0.956625	Liver	0	0	0	0.0266722	0.155797	0.0138741	0
chr1	7837219	7838229	+	2	159,52	VAMP3	hsa_circ_0006354	1010	211	1	Esophagus	0.140359	0	0	0	0	0	0
chr17	45447802	45456619	+	4	72,495,138,72	EFCAB13	hsa_circ_0044242	8817	777	0.880236	Thyroid	0	0	0.0294487	0.031399	0.0139696	0.125343	0.0152525
chr6	154520801	154535410	-	3	373,86,59	IPCEF1	hsa_circ_0078336	14609	518	0.991296	Thyroid	0	0.0155604	0	0	0.0069905	0.431819	0
chr3	63898263	63898901	+	2	336,69	ATXN7	hsa_circ_0007761	638	405	0.914189	Esophagus	0.190791	0.0129496	0	0.0467118	0.0128218	0.0124137	0.0133352
chr3	65415194	65428524	-	5	621,183,93,134,58	MAGI1	hsa_circ_0003540	13330	1089	0.889705	Thyroid	0.019918	0.00507185	0.0297092	0.0140244	0.0408216	0.165534	0
chr1	200012901	200090083	+	5	119,142,647,120,148	NR5A2	hsa_circ_0015814	77182	1176	0.851394	Liver	0.019918	0	0.039434	0.0137737	0.166323	0	0.0751735
chr4	151336589	151412187	-	7	153,120,141,113,116,103,118	LRBA	hsa_circ_0125513	75598	864	0.96678	Intestine	0.0538467	0	0	0.168292	0.0128008	0.0154051	1.256
chr7	107312582	107315554	+	3	111,185,165	SLC26A4	hsa_circ_0132980	2972	461	1	Thyroid	0	0	0	0	0	0.180358	0
chr12	97924432	97954825	+	3	205,162,251	RMST	hsa_circ_0099637	30393	618	1	Thyroid	0	0	0	0	0	0.103614	0
chr8	92301363	92307931	+	2	111,173	SLC26A7	hsa_circ_0137287	6568	284	1	Thyroid	0	0	0	0	0	0.424293	0
chr8	92301363	92330608	+	3	111,173,165	SLC26A7	hsa_circ_0137288	29245	449	1	Thyroid	0	0	0	0	0	3.83978	0
chr3	136699307	136714398	+	5	127,191,125,151,143	IL20RB	hsa_circ_0067492	15091	737	1	Esophagus	0.142097	0	0	0	0	0	0
chr4	151356740	151412187	-	6	120,141,113,116,103,118	LRBA	hsa_circ_0125514	55447	711	0.962838	Intestine	0.0203892	0	0	0.0758938	0	0	0.431815
chr7	157174939	157178305	+	3	132,142,71	DNAJB6	hsa_circ_0083176	3366	345	0.977974	Esophagus	0.112826	0	0	0.0149104	0	0	0
chr4	177632652	177650900	-	3	152,191,214	VEGFC	hsa_circ_0004496	18248	557	0.983622	Thyroid	0	0	0.0133507	0	0	0.135858	0
chr6	168910594	168949883	+	6	172,107,100,48,84,75	SMOC2	hsa_circ_0131341	39289	586	0.958122	Stomach	0.0189448	0	0	0.184681	0	0.0141985	0.0132606
chr8	92355580	92406267	+	10	114,78,96,107,67,138,49,101,55,104	SLC26A7	hsa_circ_0137292	50687	909	1	Thyroid	0	0	0	0	0	0.1692	0
chr5	78251117	78281381	-	4	208,191,187,622	ARSB	hsa_circ_0129712	30264	1208	1	Liver	0	0	0	0	0.139423	0	0
chr4	151271143	151412187	-	8	168,153,120,141,113,116,103,118	LRBA	hsa_circ_0071152	141044	1032	0.982672	Intestine	0	0	0	0.0151788	0	0	0.145993
chr3	120351993	120357428	-	2	182,127	HGD	hsa_circ_0066914	5435	309	1	Liver	0	0	0	0	0.113281	0	0
chr4	120517677	120528452	-	2	90,589	PDE5A	hsa_circ_0002474	10775	679	0.902753	Esophagus	0.102452	0	0.0131447	0.0400083	0	0	0.00662573
chr11	35222628	35226187	+	3	114,117,129	CD44	hsa_circ_0021727	3559	360	1	Esophagus	0.319986	0	0	0	0	0	0
chr8	95676924	95677424	+	3	111,133,43	ESRP1	hsa_circ_0084927	500	287	0.962551	Esophagus	0.195908	0	0.0133507	0	0	0.0306681	0
chr16	15808765	15809129	-	2	173,109	MYH11	hsa_circ_0105076	364	282	0.881132	Stomach	0.0757793	0	0	0.106251	0	0	0
chr2	160980301	160983112	-	2	98,223	ITGB6	hsa_circ_0056856	2811	321	0.979864	Esophagus	0.110296	0	0.0133256	0	0	0	0
chr12	56628607	56629484	+	3	163,170,141	SLC39A5	hsa_circ_0026920	877	474	0.970955	Liver	0	0	0	0	0.24316	0	0.042375
