# Supplementary material for: Characterization of distinct circular RNA signatures in solid tumors
Source: Mol Cancer. 2022 Mar 2;21:63. doi: 10.1186/s12943-022-01546-4 (PMC8889743; doi:10.1186/s12943-022-01546-4)
Supplement: Supplementary file 9 — Additional file 9: Table S13. The detailed mapping statistics of samples used in this study. [file 12943_2022_1546_MOESM9_ESM.xlsx]

## Sheet: Table S13
Table S13. The detailed mapping statistics of samples used in this study.
Patient ID	Sample ID	Tumor_type	Tissue_type	Clean reads	Uniquely mapped reads	Uniquely mapped rate (%)	Multi mapped reads	Multi mapped rate (%)	Unmapped rate (%)	circRNA_number	Total_junction_reads
P1	P1T	ESCC	Tumor	63028401	57982407	91.99	4015766	6.37	1.64	6966	20555
P1	P1N	ESCC	Normal	62962862	56927062	90.41	4969670	7.89	1.7	8825	26723
P2	P2T	ESCC	Tumor	59434000	53932975	90.74	3819959	6.43	2.83	5285	11833
P2	P2N	ESCC	Normal	58237708	53732843	92.26	3390099	5.82	1.92	8517	25132
P3	P3T	ESCC	Tumor	59687889	49451645	82.85	5501816	9.22	7.93	5824	12731
P3	P3N	ESCC	Normal	56519906	49416643	87.43	5241316	9.27	3.3	10730	36371
P4	P4T	ESCC	Tumor	59483874	53846698	90.52	4525649	7.61	1.87	7227	18779
P4	P4N	ESCC	Normal	64220071	57846327	90.08	4748110	7.39	2.53	7551	20262
P5	P5T	ESCC	Tumor	55996901	49673585	88.71	5105638	9.12	2.17	6693	16581
P5	P5N	ESCC	Normal	56631029	51367257	90.71	4131645	7.3	1.99	9033	27960
P6	P6T	ESCC	Tumor	55506441	49957410	90	4389251	7.91	2.09	7097	19902
P6	P6N	ESCC	Normal	54488563	49108619	90.13	4347602	7.98	1.89	8276	24276
P7	P7T	ESCC	Tumor	54776466	49945312	91.18	4098295	7.48	1.34	5817	13192
P7	P7N	ESCC	Normal	59448963	53182875	89.46	5006891	8.42	2.12	7629	20898
P8	P8T	ESCC	Tumor	57218998	50426401	88.13	5504884	9.62	2.25	4791	9841
P8	P8N	ESCC	Normal	53938075	45532319	84.42	4377889	8.12	7.46	6903	17491
P9	P9T	ESCC	Tumor	51678761	46386634	89.76	4135308	8	2.24	6192	15504
P9	P9N	ESCC	Normal	50764691	45296226	89.23	3768935	7.42	3.35	8136	24008
P10	P10T	ESCC	Tumor	55755750	49860371	89.43	4650191	8.34	2.23	4996	10832
P10	P10N	ESCC	Normal	56858312	50693236	89.16	4837339	8.51	2.33	7238	18887
P11	P11T	ESCC	Tumor	54786933	49073315	89.57	4341406	7.92	2.51	5301	11541
P11	P11N	ESCC	Normal	54049584	49492484	91.57	3703978	6.85	1.58	8263	23266
P12	P12T	ESCC	Tumor	56882928	50298107	88.42	5379712	9.46	2.12	6932	18647
P12	P12N	ESCC	Normal	56523445	50424675	89.21	4995382	8.84	1.95	9712	31959
P13	P13T	ESCC	Tumor	48964534	43110934	88.05	4656004	9.51	2.44	4663	9852
P13	P13N	ESCC	Normal	55438358	49727667	89.7	4186027	7.55	2.75	7702	20950
P14	P14T	ESCC	Tumor	55925874	47812288	85.49	3794303	6.78	7.73	11038	37240
P14	P14N	ESCC	Normal	54440123	48957640	89.93	4449144	8.17	1.9	7600	20846
P15	P15T	ESCC	Tumor	61190866	55147033	90.12	4759867	7.78	2.1	7617	21627
P15	P15N	ESCC	Normal	53087870	47572060	89.61	4406397	8.3	2.09	7718	21791
P16	P16T	ESCC	Tumor	60529247	54483489	90.01	5085604	8.4	1.59	8248	22193
P16	P16N	ESCC	Normal	61280481	55376882	90.37	4901004	8	1.63	8522	24512
P17	P17T	ESCC	Tumor	56717915	50921065	89.78	4529535	7.99	2.23	6978	18129
P17	P17N	ESCC	Normal	59252832	53175989	89.74	4749195	8.02	2.24	8751	27112
P18	P18T	ESCC	Tumor	57242253	49282200	86.09	6230911	10.89	3.02	7153	19324
P18	P18N	ESCC	Normal	53802662	49133649	91.32	3709839	6.9	1.78	9740	31475
P19	P19T	ESCC	Tumor	54713360	48768439	89.13	4787242	8.75	2.12	5325	11348
P19	P19N	ESCC	Normal	55227541	49211042	89.11	4934839	8.94	1.95	7621	20712
P20	P20T	ESCC	Tumor	57281271	51124048	89.25	5135817	8.97	1.78	10847	40358
P20	P20N	ESCC	Normal	59090580	53921759	91.25	4132561	6.99	1.76	10050	35802
P21	P21T	ESCC	Tumor	59153193	53168874	89.88	4976634	8.41	1.71	8331	24812
P21	P21N	ESCC	Normal	57116975	51400654	89.99	4682963	8.2	1.81	8882	26791
P22	P22T	ESCC	Tumor	57871446	51811099	89.53	4896226	8.46	2.01	7287	18086
P22	P22N	ESCC	Normal	56328891	49358426	87.63	5687924	10.1	2.27	9251	27157
P23	P23T	GBM	Tumor	67282487	62237876	92.5	3933084	5.85	1.65	11879	46995
P23	P23N	GBM	Normal	66680373	61526430	92.27	3955390	5.93	1.8	11325	43443
P24	P24T	GBM	Tumor	88318029	80752038	91.43	5943052	6.73	1.84	11696	47824
P24	P24N	GBM	Normal	66842115	61449202	91.93	4249073	6.36	1.71	10043	35197
P25	P25T	GBM	Tumor	63337049	56732670	89.57	5408519	8.54	1.89	7861	23400
P25	P25N	GBM	Normal	64899928	59441567	91.59	4318566	6.65	1.76	8190	24681
P26	P26T	GBM	Tumor	72309849	65654214	90.8	5338072	7.38	1.82	9082	30134
P26	P26N	GBM	Normal	65305887	60227779	92.22	3887885	5.95	1.83	12452	51165
P27	P27T	GBM	Tumor	90467155	82824406	91.55	5874431	6.49	1.96	8320	25196
P27	P27N	GBM	Normal	72561076	65192160	89.84	5709129	7.87	2.29	8558	24046
P28	P28T	GBM	Tumor	77677501	70847470	91.21	5582651	7.19	1.6	8464	28849
P28	P28N	GBM	Normal	85193606	78228239	91.82	5404758	6.34	1.84	13973	65202
P29	P29T	GBM	Tumor	74699025	67569144	90.46	5575673	7.46	2.08	8582	24781
P29	P29N	GBM	Normal	64626819	59292869	91.75	4032320	6.24	2.01	12982	53641
P30	P30T	GBM	Tumor	70537584	62493667	88.6	7003424	9.93	1.47	9290	29258
P30	P30N	GBM	Normal	71736659	66368649	92.52	4123214	5.75	1.73	11927	48218
P31	P31T	GBM	Tumor	86663268	78993111	91.15	6161403	7.11	1.74	10243	37493
P31	P31N	GBM	Normal	75625411	69156745	91.45	5086106	6.73	1.82	10584	40312
P32	P32T	GBM	Tumor	71650845	65589278	91.54	4749855	6.63	1.83	10598	41516
P32	P32N	GBM	Normal	61214109	55287693	90.32	4653492	7.6	2.08	12155	43968
P33	P33T	GBM	Tumor	60636349	54808072	90.39	4725519	7.79	1.82	14173	56594
P33	P33N	GBM	Normal	60283974	54289682	90.06	4637475	7.69	2.25	9125	25949
P34	P34T	GBM	Tumor	85727877	77815276	90.77	6312505	7.36	1.87	9767	32650
P34	P34N	GBM	Normal	106204489	98583404	92.82	5817794	5.48	1.7	12800	59977
P35	P35T	GBM	Tumor	86766957	78993710	91.04	6210086	7.16	1.8	7028	19781
P35	P35N	GBM	Normal	85815031	78756463	91.77	5669498	6.61	1.62	11213	41431
P36	P36T	GBM	Tumor	89254152	81489164	91.3	6304758	7.06	1.64	8814	31596
P36	P36N	GBM	Normal	98959598	91345828	92.31	5928043	5.99	1.7	15097	69734
P37	P37T	GBM	Tumor	59907498	55299142	92.31	3788105	6.32	1.37	7568	22221
P37	P37N	GBM	Normal	64406411	59722498	92.73	3696522	5.74	1.53	8798	32510
P38	P38T	GBM	Tumor	84531319	74676870	88.34	8294689	9.81	1.85	9374	30701
P38	P38N	GBM	Normal	72761871	66051032	90.78	5289200	7.27	1.95	10586	34814
P39	P39T	GBM	Tumor	73636943	67121401	91.15	5139619	6.98	1.87	8865	27390
P39	P39N	GBM	Normal	75689600	69868315	92.31	4541553	6	1.69	14053	63568
P40	P40T	GBM	Tumor	68360211	62115171	90.86	5088912	7.44	1.7	7896	24334
P40	P40N	GBM	Normal	80917086	74507325	92.08	4882871	6.03	1.89	14668	69532
P41	P41T	GBM	Tumor	74396994	67301150	90.46	5607678	7.54	2	9799	31671
P41	P41N	GBM	Normal	68838181	62574563	90.9	4942104	7.18	1.92	10880	36751
P42	P42T	GBM	Tumor	64963080	59563116	91.69	4258915	6.56	1.75	9299	29096
P42	P42N	GBM	Normal	82886115	76242379	91.98	4955232	5.98	2.04	13166	58031
P82	P82N	GC	Normal	77962697	67067286	86.02	8859156	11.36	2.62	10119	46292
P82	P82T	GC	Tumor	71594926	61460081	85.84	8102546	11.32	2.84	6331	18785
P83	P83N	GC	Normal	72311926	63234974	87.45	7225923	9.99	2.56	12029	59961
P83	P83T	GC	Tumor	70997164	60276944	84.9	8697837	12.25	2.85	4071	9514
P84	P84N	GC	Normal	73520616	64976785	88.38	6359648	8.65	2.97	7217	24022
P84	P84T	GC	Tumor	73044624	63099260	86.38	8377507	11.47	2.15	7213	20307
P76	P76N	GC	Normal	94305962	85631454	90.8	6856149	7.27	1.93	11355	50335
P76	P76T	GC	Tumor	80708835	68464959	84.83	10252956	12.7	2.47	6575	17225
P77	P77N	GC	Normal	74845290	65881563	88.02	6748570	9.02	2.96	8092	27166
P77	P77T	GC	Tumor	72766824	61189699	84.09	9588454	13.18	2.73	7377	23319
P78	P78N	GC	Normal	81472598	71304502	87.52	7180028	8.81	3.67	11517	50195
P78	P78T	GC	Tumor	79083975	70249189	88.83	6632240	8.39	2.78	8279	27772
P79	P79N	GC	Normal	88233682	74984405	84.98	9519568	10.79	4.23	9437	33836
P79	P79T	GC	Tumor	94908240	82322785	86.74	10152977	10.7	2.56	6353	18792
P80	P80N	GC	Normal	71856424	63696372	88.64	5526064	7.69	3.67	9871	41971
P80	P80T	GC	Tumor	91839252	76175438	82.94	12495564	13.61	3.45	7796	27295
P81	P81N	GC	Normal	84410179	72602187	86.01	8577926	10.16	3.83	9413	34632
P81	P81T	GC	Tumor	80761022	72234554	89.44	6636777	8.22	2.34	6638	19775
P94	P94N	HCC	Normal	72800830	64338372	88.38	6760959	9.29	2.33	8055	27506
P94	P94T	HCC	Tumor	85353805	74310784	87.06	8817400	10.33	2.61	6357	17029
P95	P95N	HCC	Normal	78329107	69058750	88.16	7482371	9.55	2.29	6057	18378
P95	P95T	HCC	Tumor	72501992	61592306	84.95	8874399	12.24	2.81	5555	14427
P96	P96N	HCC	Normal	91735862	81287676	88.61	8366685	9.12	2.27	5263	15305
P96	P96T	HCC	Tumor	92478693	80518032	87.07	9794177	10.59	2.34	4944	12931
P97	P97N	HCC	Normal	73546264	66148215	89.94	5975237	8.12	1.94	5216	14615
P97	P97T	HCC	Tumor	71804550	62153530	86.56	7728388	10.76	2.68	6251	19074
P98	P98N	HCC	Normal	77883896	69533211	89.28	6636884	8.52	2.2	6775	21041
P98	P98T	HCC	Tumor	84923401	74295974	87.49	8567286	10.09	2.42	5009	12840
P99	P99N	HCC	Normal	79569843	70957109	89.18	6943853	8.73	2.09	6436	22024
P99	P99T	HCC	Tumor	72878942	62375205	85.59	8980535	12.32	2.09	6912	23207
P100	P100N	HCC	Normal	83798892	75594823	90.21	6520621	7.78	2.01	6470	22293
P100	P100T	HCC	Tumor	99210301	86715992	87.41	10095473	10.18	2.41	5522	20542
P101	P101N	HCC	Normal	80832381	71525656	88.49	7597437	9.4	2.11	6492	21484
P101	P101T	HCC	Tumor	79503589	71193411	89.55	6826918	8.59	1.86	6230	22895
P102	P102N	HCC	Normal	83551333	74953883	89.71	6665986	7.98	2.31	6919	23904
P102	P102T	HCC	Tumor	78807342	66590268	84.5	10665083	13.53	1.97	10183	41824
P85	P85N	HCC	Normal	76031120	69320668	91.17	5241566	6.89	1.94	5542	15619
P85	P85T	HCC	Tumor	91454623	81368882	88.97	7939201	8.68	2.35	5275	15630
P86	P86N	HCC	Normal	69982337	64564682	92.26	3993591	5.71	2.03	5232	14438
P86	P86T	HCC	Tumor	84521100	77278653	91.43	5567060	6.59	1.98	5596	15927
P87	P87N	HCC	Normal	79991009	72221716	90.29	6044919	7.56	2.15	5428	15356
P87	P87T	HCC	Tumor	89569297	80309659	89.66	7330097	8.18	2.16	5058	14136
P88	P88N	HCC	Normal	89091365	80819645	90.72	6629937	7.44	1.84	7219	27736
P88	P88T	HCC	Tumor	73404805	66170525	90.14	6021408	8.2	1.66	5702	14893
P89	P89N	HCC	Normal	76663570	70033737	91.35	5071197	6.61	2.04	6100	18081
P89	P89T	HCC	Tumor	69679474	62587118	89.82	5758331	8.26	1.92	3590	8493
P90	P90N	HCC	Normal	82879514	74804535	90.26	6200363	7.48	2.26	5691	16938
P90	P90T	HCC	Tumor	72376017	66006538	91.2	5111381	7.06	1.74	9041	34519
P91	P91N	HCC	Normal	68932685	62430427	90.57	5145588	7.46	1.97	6848	21627
P91	P91T	HCC	Tumor	81015716	71991095	88.86	7198966	8.89	2.25	8440	28865
P92	P92N	HCC	Normal	76937917	69034887	89.73	6458378	8.39	1.88	7088	24955
P92	P92T	HCC	Tumor	79759706	68645995	86.07	9528688	11.95	1.98	4951	17016
P93	P93N	HCC	Normal	81794253	71142094	86.98	8820693	10.78	2.24	7597	27503
P93	P93T	HCC	Tumor	78587106	66404520	84.5	10008757	12.74	2.76	6599	20409
P52	P52N	LUAD	Normal	91468481	83188265	90.95	7200106	7.87	1.18	10339	41499
P52	P52T	LUAD	Tumor	76602828	68756126	89.76	6676899	8.72	1.52	6410	17965
P53	P53N	LUAD	Normal	88684255	81395421	91.78	5961897	6.72	1.5	8361	30138
P53	P53T	LUAD	Tumor	72576747	59589968	82.11	11031278	15.2	2.69	5100	13789
P54	P54N	LUAD	Normal	75412246	67914647	90.06	5916765	7.85	2.09	6969	24041
P54	P54T	LUAD	Tumor	73564576	64743164	88.01	7021310	9.54	2.45	5500	15055
P55	P55N	LUAD	Normal	73540352	61413162	83.51	10393655	14.13	2.36	10722	51456
P55	P55T	LUAD	Tumor	103891838	90686234	87.29	10815867	10.41	2.3	6387	20700
P56	P56N	LUAD	Normal	91238215	82458895	90.38	7573453	8.3	1.32	11060	44399
P56	P56T	LUAD	Tumor	87041908	75967948	87.28	8840974	10.16	2.56	5170	14446
P57	P57N	LUAD	Normal	73499328	67213881	91.45	4847093	6.59	1.96	5824	15734
P57	P57T	LUAD	Tumor	93353196	81828899	87.66	9802432	10.5	1.84	6848	20334
P58	P58N	LUAD	Normal	73898757	66963250	90.61	5330959	7.21	2.18	6729	20436
P58	P58T	LUAD	Tumor	73942514	66930906	90.52	5387921	7.29	2.19	6030	17256
P59	P59N	LUAD	Normal	82163963	74902210	91.16	5803407	7.06	1.78	7855	26578
P59	P59T	LUAD	Tumor	79235510	70368115	88.81	6617397	8.35	2.84	6872	22835
P43	P43N	LUAD	Normal	82150442	75043696	91.35	5531055	6.73	1.92	8396	27625
P43	P43T	LUAD	Tumor	87996190	78272773	88.95	7692482	8.74	2.31	5853	14426
P44	P44N	LUAD	Normal	90490764	81743774	90.33	6733357	7.44	2.23	8158	29026
P44	P44T	LUAD	Tumor	73087033	62511834	85.53	8132624	11.13	3.34	4970	12875
P45	P45N	LUAD	Normal	133280219	120077541	90.09	10429159	7.82	2.09	9570	36905
P45	P45T	LUAD	Tumor	101165155	85955730	84.97	12324341	12.18	2.85	7992	27141
P46	P46N	LUAD	Normal	76757820	69262956	90.24	5934132	7.73	2.03	7734	25233
P46	P46T	LUAD	Tumor	67519495	60667009	89.85	5393232	7.99	2.16	6724	20194
P47	P47N	LUAD	Normal	81080683	67319173	83.03	11815415	14.57	2.4	10337	45290
P47	P47T	LUAD	Tumor	77904624	67593263	86.76	8732719	11.21	2.03	5726	15669
P48	P48N	LUAD	Normal	82931019	75751105	91.34	5400273	6.51	2.15	6509	20514
P48	P48T	LUAD	Tumor	78140429	67490250	86.37	8812632	11.28	2.35	4797	13508
P49	P49N	LUAD	Normal	84988487	76076568	89.51	7089277	8.34	2.15	8101	27987
P49	P49T	LUAD	Tumor	72351946	59950443	82.86	10571146	14.61	2.53	4511	12658
P50	P50N	LUAD	Normal	78050325	71274571	91.32	5002627	6.41	2.27	7659	25324
P50	P50T	LUAD	Tumor	83418569	68201040	81.76	13146533	15.76	2.48	5038	12663
P51	P51N	LUAD	Normal	78256948	71645913	91.55	4928583	6.3	2.15	6808	22287
P51	P51T	LUAD	Tumor	95818730	87605021	91.43	6095412	6.36	2.21	5517	15490
P69	P69N	THCA	Normal	68053052	62001548	91.11	4574851	6.72	2.17	8261	30601
P69	P69T	THCA	Tumor	70307762	64576430	91.85	4191372	5.96	2.19	6123	21037
P70	P70N	THCA	Normal	69541460	62904146	90.46	5159344	7.42	2.12	9045	36567
P70	P70T	THCA	Tumor	72533814	65967155	90.95	4944506	6.82	2.23	7067	24577
P71	P71N	THCA	Normal	72485829	65552090	90.43	5419251	7.48	2.09	10060	43900
P71	P71T	THCA	Tumor	91215476	82501945	90.45	6968273	7.64	1.91	7323	28590
P72	P72N	THCA	Normal	89133713	81069476	90.95	6218226	6.98	2.07	10590	51304
P72	P72T	THCA	Tumor	68340951	61072891	89.37	5822461	8.52	2.11	6746	25833
P73	P73N	THCA	Normal	88187631	80049297	90.77	6312509	7.16	2.07	9833	43245
P73	P73T	THCA	Tumor	80017493	72247251	90.29	6173368	7.72	1.99	7208	27940
P74	P74N	THCA	Normal	72904042	66438002	91.13	5107956	7.01	1.86	9322	41914
P74	P74T	THCA	Tumor	78205267	70412253	90.04	6351745	8.12	1.84	8048	39884
P75	P75N	THCA	Normal	78014917	65816627	84.36	10390734	13.32	2.32	11477	54059
P75	P75T	THCA	Tumor	80645330	73122306	90.67	5993056	7.43	1.9	7857	31441
P60	P60N	THCA	Normal	72862832	65243799	89.54	6125110	8.41	2.05	6597	21887
P60	P60T	THCA	Tumor	75497892	69408759	91.93	4807283	6.37	1.7	8695	34075
P61	P61N	THCA	Normal	89973611	81614098	90.71	6584299	7.32	1.97	11345	60276
P61	P61T	THCA	Tumor	74591419	67069452	89.92	5835138	7.82	2.26	5801	20687
P62	P62N	THCA	Normal	73430561	64034761	87.2	8065350	10.98	1.82	8596	29866
P62	P62T	THCA	Tumor	82173089	70395780	85.67	9531197	11.6	2.73	7289	25483
P63	P63N	THCA	Normal	76240046	69431390	91.07	5354222	7.02	1.91	9602	40036
P63	P63T	THCA	Tumor	75360394	67118381	89.06	6450297	8.56	2.38	9897	47339
P64	P64N	THCA	Normal	71075672	64452549	90.68	5451262	7.67	1.65	8949	36159
P64	P64T	THCA	Tumor	88468960	77542274	87.65	8874413	10.03	2.32	9185	34876
P65	P65N	THCA	Normal	83131454	76226332	91.69	5426851	6.53	1.78	11283	58644
P65	P65T	THCA	Tumor	94099045	86758155	92.2	5537776	5.89	1.91	7711	35374
P66	P66N	THCA	Normal	82700911	73394505	88.75	7388281	8.93	2.32	8598	33373
P66	P66T	THCA	Tumor	71860129	62966556	87.62	7560698	10.52	1.86	8060	28295
P67	P67N	THCA	Normal	83838959	74931819	89.38	7054959	8.41	2.21	9520	38229
P67	P67T	THCA	Tumor	74538265	67960769	91.18	5166470	6.93	1.89	7646	27711
P68	P68N	THCA	Normal	73723634	68104114	92.38	4406268	5.98	1.64	10752	47898
P68	P68T	THCA	Tumor	70112762	63232884	90.19	5336618	7.61	2.2	8385	32779
P122	P122N	CRC	Normal	75396055	63581860	84.33	10345467	13.72	1.95	5489	17900
P122	P122T	CRC	Tumor	74684197	61625968	82.52	10862643	14.54	2.94	4962	14432
P121	P121N	CRC	Normal	80440594	68160811	84.73	10532303	13.09	2.18	7512	27374
P121	P121T	CRC	Tumor	92298200	81773741	88.6	8987995	9.74	1.66	5001	13795
P120	P120N	CRC	Normal	76218788	66341573	87.04	8089305	10.61	2.35	5663	16460
P120	P120T	CRC	Tumor	78381808	62721724	80.02	12683536	16.18	3.8	5133	14585
P119	P119N	CRC	Normal	77564127	69812751	90.01	6229793	8.03	1.96	9459	40347
P119	P119T	CRC	Tumor	76053950	64219630	84.44	10052373	13.22	2.34	5525	16146
P118	P118N	CRC	Normal	85447769	75463380	88.32	8237744	9.64	2.04	9046	36007
P118	P118T	CRC	Tumor	109224102	90526020	82.88	15623482	14.3	2.82	4257	12442
P117	P117N	CRC	Normal	86074356	75359001	87.55	8580057	9.97	2.48	5888	18221
P117	P117T	CRC	Tumor	77362883	65769247	85.01	9472560	12.24	2.75	6504	20227
P116	P116N	CRC	Normal	78706116	70320582	89.35	6864383	8.72	1.93	10551	50057
P116	P116T	CRC	Tumor	86230081	74014074	85.83	9968187	11.56	2.61	7311	24479
P115	P115N	CRC	Normal	85228862	73644209	86.41	9741089	11.43	2.16	5964	17787
P115	P115T	CRC	Tumor	69944362	59919757	85.67	7357644	10.52	3.81	4980	13101
P114	P114N	CRC	Normal	77505272	66109642	85.3	8894116	11.48	3.22	3918	9228
P114	P114T	CRC	Tumor	79927905	65696562	82.19	11433181	14.3	3.51	4353	11230
P113	P113N	CRC	Normal	81379669	72449202	89.03	7237536	8.89	2.08	9557	41323
P113	P113T	CRC	Tumor	82839658	70695499	85.34	10172654	12.28	2.38	5282	14279
P112	P112N	CRC	Normal	86074873	77217691	89.71	6973648	8.1	2.19	7730	28075
P112	P112T	CRC	Tumor	76877178	63871301	83.08	11276337	14.67	2.25	4872	14565
P111	P111N	CRC	Normal	87210529	78606038	90.13	6920661	7.94	1.93	8504	33604
P111	P111T	CRC	Tumor	74264914	61106982	82.28	11794240	15.88	1.84	4956	13385
P110	P110N	CRC	Normal	73295565	63952380	87.25	6372894	8.69	4.06	5299	14614
P110	P110T	CRC	Tumor	81804115	69753444	85.27	9574699	11.7	3.03	3871	9444
P109	P109N	CRC	Normal	73752571	59125942	80.17	12773940	17.32	2.51	6810	22014
P109	P109T	CRC	Tumor	77407958	65446668	84.55	9980798	12.89	2.56	5361	14523
P108	P108N	CRC	Normal	77015686	67256910	87.33	8011735	10.4	2.27	7433	22376
P108	P108T	CRC	Tumor	80172760	72388151	90.29	6358725	7.93	1.78	7259	19228
P107	P107N	CRC	Normal	74110834	64395836	86.89	7182948	9.69	3.42	9040	36825
P107	P107T	CRC	Tumor	83465455	71502222	85.67	7890763	9.45	4.88	6659	19400
P106	P106N	CRC	Normal	66496054	55882626	84.04	6132155	9.22	6.74	6266	20983
P106	P106T	CRC	Tumor	66721947	53581348	80.31	9488095	14.22	5.47	3078	6730
P105	P105N	CRC	Normal	91135295	80322504	88.14	8668809	9.51	2.35	7546	28524
P105	P105T	CRC	Tumor	82039270	67411455	82.17	13163797	16.05	1.78	4475	11873
P104	P104N	CRC	Normal	87793697	77789805	88.61	7836064	8.93	2.46	8179	33188
P104	P104T	CRC	Tumor	90972934	78075255	85.82	10895666	11.98	2.2	4723	12554
P103	P103N	CRC	Normal	77820363	68773745	88.37	6986856	8.98	2.65	7729	28870
P103	P103T	CRC	Tumor	105424446	87173614	82.69	15638867	14.83	2.48	7074	26030
