# Supplementary material for: Characterization of distinct circular RNA signatures in solid tumors
Source: Mol Cancer. 2022 Mar 2;21:63. doi: 10.1186/s12943-022-01546-4 (PMC8889743; doi:10.1186/s12943-022-01546-4)
Supplement: Supplementary file 10 — Additional file 10: Table S14. The expression profiles of 1209 differentially expressed circRNAs identified in this study. [file 12943_2022_1546_MOESM10_ESM.xlsx]

## Sheet: Table S14
Table S14. The expression profiles of 1209 differentially expressed circRNAs identified in this study.
chr	start	end	strand	exon count	exon sizes	gene name	circBase_ID	genomic_length	spliced_length	Number_of_cancer	circRNA_type	alteration_type	log2FoldChange_ESCC	pvalue_ESCC	padj_ESCC	significance_ESCC	log2FoldChange_GBM	pvalue_GBM	padj_GBM	significance_GBM	log2FoldChange_LUAD	pvalue_LUAD	padj_LUAD	significance_LUAD	log2FoldChange_THCA	pvalue_THCA	padj_THCA	significance_THCA	log2FoldChange_GC	pvalue_GC	padj_GC	significance_GC	log2FoldChange_HCC	pvalue_HCC	padj_HCC	significance_HCC	log2FoldChange_CRC	pvalue_CRC	padj_CRC	significance_CRC
chr13	21742126	21742538	-	1	412	SKA3	hsa_circ_0000467	412	412	3	circRNA_altered_in_3_cancer_types	Consistently_altered	0.389337	0.166264	0.364526	None	1.25683	0.00711581	0.0245279	Up	NA	NA	NA	NA	NA	NA	NA	NA	2.46954	0.000161695	0.009444	Up	NA	NA	NA	NA	1.81362	3.71547e-07	6.25523e-06	Up
chr13	43528083	43544806	-	5	74,84,74,84,59	EPSTI1	hsa_circ_0000479	16723	375	1	Cancer_specific	Exclusively_altered_in_ESCC	1.11314	0.00277946	0.0247174	Up	NA	NA	NA	NA	NA	NA	NA	NA	NA	NA	NA	NA	0.21997	0.796865	0.906675	None	NA	NA	NA	NA	NA	NA	NA	NA
chr13	48830312	48832372	+	2	207,111	ITM2B	hsa_circ_0100635	2060	318	1	Cancer_specific	Exclusively_altered_in_ESCC	-1.3103	0.00314978	0.0270446	Down	NA	NA	NA	NA	NA	NA	NA	NA	NA	NA	NA	NA	NA	NA	NA	NA	NA	NA	NA	NA	NA	NA	NA	NA
chr13	76134888	76143643	+	4	129,157,86,48	UCHL3	hsa_circ_0000494	8755	420	1	Cancer_specific	Exclusively_altered_in_CRC	-0.21748	0.371972	0.588336	None	0.435128	0.0949445	0.187728	None	0.712778	0.0222137	0.0926117	None	-0.670389	0.00138849	0.0182106	None	0.797135	0.0236022	0.13073	None	-0.188545	0.591388	0.75402	None	1.15481	0.00171921	0.00795642	Up
chr12	28408513	28460682	+	6	82,44,79,158,204,105	CCDC91	hsa_circ_0098286	52169	672	1	Cancer_specific	Exclusively_altered_in_GBM	0.466413	0.146884	0.338202	None	1.38212	0.00690352	0.0238637	Up	0.371606	0.121909	0.294138	None	-0.328261	0.219273	0.51614	None	0.289963	0.384246	0.611588	None	-0.108469	0.676807	0.8099	None	0.310464	0.249	0.399505	None
chr12	28458581	28544344	+	5	158,204,105,78,108	CCDC91	hsa_circ_0008250	85763	653	1	Cancer_specific	Exclusively_altered_in_ESCC	1.72156	9.79471e-06	0.000316151	Up	-0.597904	0.0135426	0.0403957	None	NA	NA	NA	NA	-0.368975	0.228812	0.531555	None	0.618702	0.133332	0.343656	None	0.989886	0.0229798	0.0939367	None	NA	NA	NA	NA
chr12	32751430	32764217	+	6	90,146,157,139,59,147	FGD4	hsa_circ_0025843	12787	738	1	Cancer_specific	Exclusively_altered_in_HCC	-0.514492	0.0136023	0.074556	None	0.660736	0.0168468	0.0480578	None	-0.714448	0.0019932	0.0156965	None	0.301947	0.177854	0.469209	None	0.103187	0.786437	0.900324	None	-1.02113	2.52466e-06	0.000100145	Down	0.100757	0.732112	0.846162	None
chr12	46230371	46233279	+	5	67,251,97,210,168	ARID2	hsa_circ_0025951	2908	793	1	Cancer_specific	Exclusively_altered_in_CRC	-1.05829	0.0296937	0.125318	None	NA	NA	NA	NA	-0.626525	0.130558	0.30299	None	-0.609791	0.112791	0.369115	None	-1.61487	0.00414636	0.0577711	None	NA	NA	NA	NA	-1.86978	3.21704e-05	0.000268962	Down
chr12	46622935	46637097	-	4	116,76,215,115	SLC38A1	hsa_circ_0000396	14162	522	1	Cancer_specific	Exclusively_altered_in_GC	-0.165828	0.268795	0.489562	None	0.169849	0.517949	0.649636	None	0.491664	0.0226526	0.0931011	None	-0.975927	0.000179803	0.00373859	None	-1.12719	0.00111791	0.0237428	Down	0.00450935	0.990782	0.998423	None	-0.30267	0.0493524	0.116867	None
chr12	46622935	46648719	-	5	116,76,215,115,123	SLC38A1	hsa_circ_0000397	25784	645	1	Cancer_specific	Exclusively_altered_in_THCA	0.408557	0.242354	0.461248	None	NA	NA	NA	NA	0.301675	0.441248	0.668951	None	-1.83423	0.00198711	0.0233657	Down	-0.324922	0.43026	0.644354	None	NA	NA	NA	NA	0.064641	0.832852	0.904302	None
chr12	51467605	51467865	-	1	260	CSRNP2	hsa_circ_0004538	260	260	1	Cancer_specific	Exclusively_altered_in_GBM	0.173827	0.561031	0.749906	None	-1.22169	0.0045292	0.0171951	Down	NA	NA	NA	NA	NA	NA	NA	NA	NA	NA	NA	NA	NA	NA	NA	NA	NA	NA	NA	NA
chr12	69644908	69656342	+	8	210,104,146,174,505,116,154,190	CPSF6	hsa_circ_0000417	11434	1599	4	circRNA_altered_in_4_cancer_types	Consistently_altered	2.13811	9.40563e-11	1.59842e-08	Up	0.377745	0.21075	0.340357	None	1.52869	0.00134749	0.0114892	Up	0.0131394	0.956689	0.99265	None	1.43714	0.0092658	0.084477	None	1.79701	1.01963e-06	5.63521e-05	Up	1.20118	0.000491978	0.00285208	Up
chr12	69983264	69985939	+	2	203,101	CCT2	hsa_circ_0000418	2675	304	1	Cancer_specific	Exclusively_altered_in_GBM	-0.0743788	0.720395	0.854765	None	1.93128	8.703e-09	8.15738e-07	Up	0.917812	0.0191321	0.0832175	None	0.0563735	0.841846	0.933863	None	0.259637	0.497026	0.710199	None	-0.531356	0.0514273	0.171585	None	0.489127	0.115025	0.225104	None
chr12	69983264	69987393	+	4	203,101,128,104	CCT2	hsa_circ_0002940	4129	536	1	Cancer_specific	Exclusively_altered_in_GBM	0.389256	0.104708	0.276244	None	1.05324	0.000143649	0.00107384	Up	0.506192	0.200101	0.399498	None	0.437961	0.132393	0.403941	None	0.28529	0.503576	0.715185	None	-0.212804	0.531448	0.707057	None	0.0589747	0.82589	0.9012	None
chr12	70193988	70195501	+	2	129,113	RAB3IP	hsa_circ_0000419	1513	242	1	Cancer_specific	Exclusively_altered_in_GBM	0.410235	0.0865366	0.251538	None	1.29195	0.00109431	0.00562624	Up	0.861373	0.0209149	0.0895001	None	0.226689	0.413224	0.688034	None	0.877031	0.0718487	0.240224	None	-0.282887	0.356137	0.570139	None	0.535477	0.1176	0.229413	None
chr12	83250788	83251359	+	1	571	TMTC2	hsa_circ_0002886	571	571	2	circRNA_altered_in_2_cancer_types	Consistently_altered	-0.654678	0.0061474	0.0425195	None	-1.13341	7.89786e-06	0.000110615	Down	-0.461588	0.133598	0.308554	None	-0.0690418	0.83924	0.933488	None	-0.881577	0.0286835	0.143341	None	NA	NA	NA	NA	-1.24086	0.000301989	0.00181934	Down
chr12	93244886	93246801	-	3	156,122,114	EEA1	hsa_circ_0099496	1915	392	1	Cancer_specific	Exclusively_altered_in_ESCC	-1.30988	0.00257439	0.023493	Down	NA	NA	NA	NA	NA	NA	NA	NA	NA	NA	NA	NA	NA	NA	NA	NA	NA	NA	NA	NA	NA	NA	NA	NA
chr12	94562928	94580249	+	3	141,135,101	PLXNC1	hsa_circ_0099504	17321	377	2	circRNA_altered_in_2_cancer_types	Consistently_altered	0.656772	0.00374659	0.0303735	None	0.463102	0.208765	0.339265	None	-0.42167	0.0702069	0.198556	None	1.79912	7.58013e-05	0.00188624	Up	0.904107	0.0270629	0.137447	None	1.70399	1.99976e-06	8.68542e-05	Up	0.251258	0.387939	0.552661	None
chr12	95602618	95605043	-	1	2425	FGD6	hsa_circ_0099549	2425	2425	2	circRNA_altered_in_2_cancer_types	Consistently_altered	0.988437	4.99688e-09	4.58398e-07	None	-0.450851	0.100689	0.195209	None	1.03299	1.68688e-05	0.000298895	Up	-0.0468878	0.77214	0.903631	None	-0.759475	0.0777534	0.252294	None	1.22367	1.82041e-05	0.000541572	Up	-0.637672	0.00714804	0.0248865	None
chr12	100166699	100175875	-	4	167,114,102,76	ANKS1B	hsa_circ_0007294	9176	459	5	circRNA_altered_in_5_cancer_types	Inconsistently_altered	-1.33424	0.000562791	0.00748812	Down	-1.30678	0.000211736	0.00147851	Down	NA	NA	NA	NA	-1.9445	5.13004e-09	6.24766e-07	Down	-1.40255	0.0182059	0.116394	None	3.08329	1.15986e-05	0.000400713	Up	-2.98559	2.29809e-07	4.15346e-06	Down
chr12	109046047	109048186	-	2	146,105	CORO1C	hsa_circ_0000437	2139	251	2	circRNA_altered_in_2_cancer_types	Consistently_altered	-0.19172	0.268123	0.489322	None	0.457808	0.028439	0.071597	None	-0.524385	0.0157427	0.0743841	None	0.444598	0.059375	0.253086	None	-1.49157	0.00032321	0.0120288	Down	0.244203	0.334748	0.549028	None	-1.43386	4.16346e-09	1.31202e-07	Down
chr12	122825299	122826244	-	1	945	CLIP1	hsa_circ_0029069	945	945	1	Cancer_specific	Exclusively_altered_in_CRC	-0.0217212	0.916866	0.959243	None	0.441629	0.207578	0.338374	None	0.250526	0.47326	0.695789	None	0.0881575	0.746646	0.890231	None	-0.531175	0.154045	0.371496	None	-0.148565	0.637604	0.781295	None	-1.13721	0.00056813	0.00318827	Down
chr12	123983090	123984083	-	2	222,119	RILPL1	hsa_circ_0007552	993	341	1	Cancer_specific	Exclusively_altered_in_GC	-0.0277173	0.918284	0.960015	None	-0.556466	0.0507267	0.11453	None	NA	NA	NA	NA	NA	NA	NA	NA	-3.1836	0.000838849	0.0200257	Down	NA	NA	NA	NA	NA	NA	NA	NA
chr11	8435041	8486369	-	9	198,86,113,76,85,89,139,105,114	STK33	hsa_circ_0096614	51328	1005	1	Cancer_specific	Exclusively_altered_in_GBM	-0.245796	0.606536	0.773933	None	1.44046	0.0159506	0.046111	Up	NA	NA	NA	NA	NA	NA	NA	NA	-0.508856	0.522337	0.725835	None	NA	NA	NA	NA	NA	NA	NA	NA
chr11	32948702	32956981	+	3	113,162,3693	QSER1	hsa_circ_0021570	8279	3968	2	circRNA_altered_in_2_cancer_types	Consistently_altered	0.81624	0.00264977	0.0238069	None	0.198361	0.357222	0.499928	None	0.790035	0.0074484	0.0424446	None	1.03649	1.76771e-05	0.000579605	Up	0.036533	0.917365	0.959712	None	1.01145	0.000720004	0.00768503	Up	0.161159	0.552064	0.710736	None
chr11	46515157	46529920	-	3	101,81,180	AMBRA1	hsa_circ_0007001	14763	362	1	Cancer_specific	Exclusively_altered_in_HCC	0.30301	0.395407	0.605088	None	-0.546227	0.0861511	0.173656	None	NA	NA	NA	NA	NA	NA	NA	NA	0.590461	0.274188	0.515112	None	1.60276	0.000396831	0.00478593	Up	0.65103	0.040998	0.101396	None
chr11	62406454	62407203	-	2	128,105	GANAB	hsa_circ_0008011	749	233	1	Cancer_specific	Exclusively_altered_in_GC	0.531683	0.14103	0.32907	None	NA	NA	NA	NA	NA	NA	NA	NA	-0.149867	0.776024	0.903631	None	1.41767	0.000694945	0.0182448	Up	0.582951	0.135361	0.32289	None	0.889103	0.0224814	0.0629376	None
chr11	70200406	70202360	+	3	152,173,94	PPFIA1	hsa_circ_0000337	1954	419	1	Cancer_specific	Exclusively_altered_in_ESCC	1.70722	1.14416e-07	7.3862e-06	Up	1.01867	0.021647	0.0586153	None	NA	NA	NA	NA	0.468674	0.137382	0.407184	None	0.526646	0.247917	0.483796	None	0.491123	0.147421	0.338816	None	NA	NA	NA	NA
chr11	85701292	85742653	-	12	129,104,137,124,86,42,107,112,94,103,76,143	PICALM	hsa_circ_0023918	41361	1257	1	Cancer_specific	Exclusively_altered_in_GBM	-0.332118	0.263586	0.483612	None	-1.91688	5.68632e-09	6.02502e-07	Down	-0.367555	0.243228	0.459181	None	0.345905	0.278706	0.574752	None	0.0405248	0.916298	0.959418	None	0.518305	0.164396	0.358844	None	-0.696972	0.0341924	0.0868231	None
chr11	85961337	85967554	+	4	153,93,66,126	EED	hsa_circ_0007455	6217	438	1	Cancer_specific	Exclusively_altered_in_CRC	-0.529497	0.173311	0.373401	None	NA	NA	NA	NA	NA	NA	NA	NA	-0.631838	0.0777901	0.300545	None	-1.12457	0.0360206	0.162045	None	NA	NA	NA	NA	-1.44193	0.000222406	0.00140895	Down
chr11	95825055	95826681	-	1	1626	MAML2	hsa_circ_0024085	1626	1626	1	Cancer_specific	Exclusively_altered_in_GBM	0.342389	0.179009	0.382369	None	1.35732	4.2006e-05	0.000409475	Up	-0.323369	0.0965141	0.244301	None	0.03523	0.833915	0.932683	None	-0.355233	0.267564	0.507177	None	-0.0398926	0.917103	0.962015	None	0.213538	0.388077	0.552661	None
chr11	107965117	107966418	+	3	124,176,162	CUL5	hsa_circ_0005580	1301	462	1	Cancer_specific	Exclusively_altered_in_GBM	-0.291629	0.419478	0.631047	None	1.25555	0.000527513	0.00309771	Up	-0.528755	0.0930895	0.239526	None	-0.447458	0.135346	0.407184	None	-0.687313	0.16113	0.379284	None	NA	NA	NA	NA	-0.832091	0.0265161	0.0719388	None
chr11	118454523	118455359	+	2	206,165	ARCN1	hsa_circ_0005589	836	371	1	Cancer_specific	Exclusively_altered_in_THCA	0.241559	0.541021	0.733851	None	NA	NA	NA	NA	1.17762	0.0443234	0.141585	None	-1.45333	0.00372843	0.0378392	Down	NA	NA	NA	NA	NA	NA	NA	NA	NA	NA	NA	NA
chr11	120346048	120348235	+	4	168,88,87,80	ARHGEF12	hsa_circ_0002955	2187	423	2	circRNA_altered_in_2_cancer_types	Consistently_altered	-0.326325	0.394296	0.604448	None	-0.250117	0.381477	0.524342	None	-0.721368	0.0345752	0.119903	None	0.0467881	0.897602	0.961382	None	-0.230192	0.625116	0.806309	None	-1.23532	0.000332638	0.0044532	Down	-1.55506	0.00251409	0.0107208	Down
chr11	128993340	129034322	-	3	85,92,109	ARHGAP32	hsa_circ_0007843	40982	286	1	Cancer_specific	Exclusively_altered_in_GBM	0.249194	0.456069	0.662643	None	-1.18135	2.60196e-05	0.000273318	Down	NA	NA	NA	NA	0.195217	0.539906	0.774213	None	0.571316	0.280796	0.52183	None	0.413682	0.276377	0.495647	None	0.991764	0.00145807	0.00705497	None
chr10	5815804	5842668	-	6	100,132,199,135,100,108	GDI2	hsa_circ_0017586	26864	774	1	Cancer_specific	Exclusively_altered_in_HCC	0.321491	0.257403	0.476784	None	0.412593	0.172844	0.29456	None	0.715159	0.0135214	0.0655269	None	-0.721722	0.0316466	0.16757	None	1.38826	0.00781468	0.0773341	None	1.43796	5.35923e-05	0.00122122	Up	0.914681	0.00438427	0.0168383	None
chr10	5827104	5842668	-	5	132,199,135,100,108	GDI2	hsa_circ_0005379	15564	674	1	Cancer_specific	Exclusively_altered_in_HCC	0.5036	0.131101	0.316056	None	0.262075	0.38132	0.524342	None	0.781955	0.00182347	0.0147623	None	-0.205878	0.441793	0.710616	None	1.17619	0.0117675	0.0947721	None	1.11407	8.74949e-05	0.001649	Up	0.627259	0.0146831	0.0455482	None
chr10	12123470	12133683	+	5	156,212,195,270,172	DHTKD1	hsa_circ_0003074	10213	1005	1	Cancer_specific	Exclusively_altered_in_GBM	0.399072	0.245892	0.465859	None	1.4404	2.58652e-05	0.000272872	Up	NA	NA	NA	NA	NA	NA	NA	NA	0.722949	0.282547	0.522852	None	-0.328767	0.227331	0.443482	None	0.484473	0.143915	0.266774	None
chr10	12123470	12162266	+	15	156,212,195,270,172,199,313,85,140,151,107,165,83,170,86	DHTKD1	hsa_circ_0007813	38796	2504	1	Cancer_specific	Exclusively_altered_in_ESCC	1.19521	0.00205505	0.019681	Up	-0.0928502	0.818261	0.875762	None	NA	NA	NA	NA	NA	NA	NA	NA	1.74528	0.00697795	0.0719058	None	0.959124	0.0110872	0.0605835	None	0.499286	0.242987	0.391904	None
chr10	15875628	15889942	-	6	80,74,115,174,61,80	FAM188A	hsa_circ_0006665	14314	584	1	Cancer_specific	Exclusively_altered_in_GBM	-0.120298	0.626606	0.786303	None	-1.07139	7.31474e-06	0.000105468	Down	NA	NA	NA	NA	-0.703135	0.0548569	0.242308	None	-1.13293	0.0176609	0.116138	None	NA	NA	NA	NA	NA	NA	NA	NA
chr10	17746429	17747740	+	3	88,55,154	STAM	hsa_circ_0008311	1311	297	1	Cancer_specific	Exclusively_altered_in_ESCC	-1.05239	0.000437358	0.00635262	Down	NA	NA	NA	NA	NA	NA	NA	NA	NA	NA	NA	NA	NA	NA	NA	NA	NA	NA	NA	NA	NA	NA	NA	NA
chr10	32197099	32199491	-	2	755,39	ARHGAP12	hsa_circ_0000231	2392	794	1	Cancer_specific	Exclusively_altered_in_HCC	0.0991858	0.548108	0.740009	None	0.366202	0.115508	0.21737	None	0.314818	0.207459	0.409858	None	-0.213884	0.132673	0.403941	None	0.387244	0.145671	0.35918	None	1.05633	6.79349e-10	1.0394e-07	Up	0.380106	0.00650432	0.0229049	None
chr10	43650344	43654379	+	2	914,217	CSGALNACT2	hsa_circ_0000236	4035	1131	1	Cancer_specific	Exclusively_altered_in_GBM	0.0759569	0.796282	0.898245	None	-1.01905	3.06985e-05	0.000315663	Down	0.207816	0.362641	0.59427	None	0.639646	0.0178227	0.113812	None	0.375896	0.24497	0.481439	None	0.307293	0.43958	0.644918	None	-0.26533	0.43864	0.605038	None
chr10	43650344	43671480	+	6	914,217,102,179,95,82	CSGALNACT2	hsa_circ_0093655	21136	1589	1	Cancer_specific	Exclusively_altered_in_THCA	0.725745	0.0375769	0.142694	None	-0.586849	0.0238101	0.0630709	None	0.600649	0.0162779	0.0751926	None	1.1531	9.77511e-05	0.0023148	Up	0.571005	0.08307	0.260544	None	NA	NA	NA	NA	-0.0698029	0.822253	0.899064	None
chr10	52193235	52350007	-	5	81,142,43,91,95	SGMS1	hsa_circ_0018401	156772	452	1	Cancer_specific	Exclusively_altered_in_GBM	0.518603	0.140921	0.32907	None	-1.24268	1.14675e-05	0.000149446	Down	NA	NA	NA	NA	0.520975	0.167481	0.452545	None	-0.0406982	0.950413	0.971696	None	-0.821935	0.0144163	0.0721488	None	NA	NA	NA	NA
chr10	52220432	52350007	-	4	142,43,91,95	SGMS1	hsa_circ_0018403	129575	371	1	Cancer_specific	Exclusively_altered_in_GBM	-0.175211	0.680324	0.826158	None	-1.80691	9.78952e-08	4.77141e-06	Down	NA	NA	NA	NA	NA	NA	NA	NA	NA	NA	NA	NA	NA	NA	NA	NA	NA	NA	NA	NA
chr10	61844359	61845011	-	2	229,97	ANK3	hsa_circ_0093804	652	326	1	Cancer_specific	Exclusively_altered_in_GBM	-0.812979	0.0191319	0.0930364	None	-1.63568	9.06461e-07	2.27737e-05	Down	NA	NA	NA	NA	-0.217439	0.564072	0.787827	None	-1.23882	0.0661892	0.231119	None	NA	NA	NA	NA	NA	NA	NA	NA
chr10	70218860	70229920	-	4	132,146,184,183	DNA2	hsa_circ_0009172	11060	645	1	Cancer_specific	Exclusively_altered_in_ESCC	1.61028	1.07073e-05	0.000339325	Up	NA	NA	NA	NA	NA	NA	NA	NA	NA	NA	NA	NA	NA	NA	NA	NA	NA	NA	NA	NA	NA	NA	NA	NA
chr10	70227879	70229920	-	2	184,183	DNA2	hsa_circ_0006151	2041	367	1	Cancer_specific	Exclusively_altered_in_GC	0.852537	0.000138224	0.00273777	None	0.676527	0.0231856	0.061812	None	0.123354	0.687794	0.835388	None	-0.209527	0.615932	0.816802	None	1.87169	3.0257e-07	0.000117903	Up	0.982631	0.00261166	0.0198375	None	0.904198	0.000745632	0.00400167	None
chr10	70246900	70266475	-	6	69,163,67,122,64,134	SLC25A16	hsa_circ_0007778	19575	619	1	Cancer_specific	Exclusively_altered_in_CRC	-0.106014	0.747104	0.869945	None	-0.135777	0.610465	0.723591	None	-0.716686	0.00741548	0.0424446	None	-0.264367	0.365597	0.653249	None	-0.233664	0.656692	0.82706	None	0.379065	0.428381	0.63739	None	-2.31471	1.93288e-09	6.78716e-08	Down
chr10	70404454	70406762	+	1	2308	TET1	hsa_circ_0093996	2308	2308	3	circRNA_altered_in_3_cancer_types	Inconsistently_altered	-0.103787	0.66528	0.815459	None	1.02877	0.000625986	0.00354113	Up	-0.244988	0.3449	0.571808	None	0.0702585	0.691831	0.86163	None	-1.19916	0.000435776	0.0135744	Down	0.225405	0.436011	0.644197	None	-1.19003	3.31511e-05	0.000275289	Down
chr10	96201652	96234540	+	2	124,116	TBC1D12	hsa_circ_0008874	32888	240	1	Cancer_specific	Exclusively_altered_in_GBM	-0.0739942	0.840851	0.919011	None	-1.29691	3.4486e-06	5.81301e-05	Down	NA	NA	NA	NA	NA	NA	NA	NA	0.568377	0.276393	0.516107	None	0.511829	0.255148	0.471145	None	NA	NA	NA	NA
chr10	103427642	103436193	-	4	95,133,186,96	FBXW4	hsa_circ_0008362	8551	510	1	Cancer_specific	Exclusively_altered_in_GC	-0.499436	0.00231031	0.021534	None	0.136013	0.582798	0.702065	None	0.000381036	0.998795	0.999677	None	-0.0722852	0.749827	0.890545	None	-1.03059	0.000749783	0.0189371	Down	-0.131897	0.606346	0.763472	None	-0.62487	0.0255589	0.0698042	None
chr10	103432671	103436193	-	3	133,186,96	FBXW4	hsa_circ_0000255	3522	415	1	Cancer_specific	Exclusively_altered_in_CRC	-0.381858	0.16028	0.356792	None	-0.178104	0.556533	0.682229	None	-0.24107	0.522583	0.730714	None	0.408878	0.231628	0.532265	None	-0.894413	0.0231118	0.13073	None	0.399688	0.215797	0.427206	None	-1.1334	0.00801782	0.0271457	Down
chr10	105382226	105420872	-	3	84,114,132	SH3PXD2A	hsa_circ_0005620	38646	330	1	Cancer_specific	Exclusively_altered_in_CRC	0.0695903	0.739091	0.864578	None	NA	NA	NA	NA	-0.32215	0.360588	0.592619	None	NA	NA	NA	NA	-1.08164	0.0213413	0.126565	None	NA	NA	NA	NA	-1.27197	0.00656868	0.0230655	Down
chr10	112640990	112650428	+	6	303,95,114,222,98,115	PDCD4	hsa_circ_0092663	9438	947	1	Cancer_specific	Exclusively_altered_in_ESCC	-1.48391	0.00156563	0.0163407	Down	-0.421858	0.238312	0.371572	None	NA	NA	NA	NA	-0.240353	0.387523	0.666191	None	-1.9683	0.00649432	0.0700155	None	NA	NA	NA	NA	NA	NA	NA	NA
chr10	128768965	128908618	+	24	84,41,56,97,149,136,158,82,136,73,80,126,125,99,73,104,184,98,90,101,135,109,71,107	DOCK1	hsa_circ_0020396	139653	2514	1	Cancer_specific	Exclusively_altered_in_ESCC	1.30348	0.0034779	0.0287297	Up	NA	NA	NA	NA	NA	NA	NA	NA	-0.52506	0.18215	0.469261	None	NA	NA	NA	NA	NA	NA	NA	NA	NA	NA	NA	NA
chr10	128768965	128926028	+	26	84,41,56,97,149,136,158,82,136,73,80,126,125,99,73,104,184,98,90,101,135,109,71,107,128,96	DOCK1	hsa_circ_0020397	157063	2738	3	circRNA_altered_in_3_cancer_types	Consistently_altered	1.18859	0.00165266	0.0171463	Up	NA	NA	NA	NA	2.7633	8.61223e-07	2.63953e-05	Up	-0.41299	0.138219	0.407184	None	2.41445	0.000181457	0.00974543	Up	NA	NA	NA	NA	0.423952	0.411052	0.575229	None
chr10	128768965	129055693	+	28	84,41,56,97,149,136,158,82,136,73,80,126,125,99,73,104,184,98,90,101,135,109,71,107,128,96,102,95	DOCK1	hsa_circ_0020399	286728	2935	2	circRNA_altered_in_2_cancer_types	Consistently_altered	1.05428	0.0208856	0.0994635	None	NA	NA	NA	NA	1.81712	0.00265521	0.0194259	Up	-0.609355	0.0471005	0.220886	None	3.24826	0.000356484	0.0123383	Up	NA	NA	NA	NA	0.617481	0.270766	0.425539	None
chr17	2297336	2298748	-	3	112,42,580	MNT	hsa_circ_0106416	1412	734	1	Cancer_specific	Exclusively_altered_in_GC	0.127216	0.790483	0.894102	None	0.19831	0.637703	0.747155	None	NA	NA	NA	NA	NA	NA	NA	NA	-1.89644	0.00277937	0.042579	Down	NA	NA	NA	NA	NA	NA	NA	NA
chr17	20107645	20109225	+	1	1580	SPECC1	hsa_circ_0000745	1580	1580	2	circRNA_altered_in_2_cancer_types	Consistently_altered	1.16087	1.92487e-07	1.19823e-05	Up	0.815914	0.00137183	0.00682274	None	0.0926032	0.735034	0.860195	None	1.26455	2.03315e-06	9.90435e-05	Up	0.599866	0.0988079	0.291741	None	0.851462	0.0226343	0.0932359	None	0.249238	0.339822	0.503669	None
chr17	29483000	29497015	+	4	144,84,191,107	NF1	hsa_circ_0007542	14015	526	2	circRNA_altered_in_2_cancer_types	Consistently_altered	0.557133	0.122628	0.303491	None	0.772011	0.016711	0.0477989	None	0.348033	0.280866	0.499557	None	0.0312829	0.906127	0.967737	None	0.939848	0.0908138	0.273853	None	1.20779	0.000404074	0.00480848	Up	1.09647	0.00531023	0.0196575	Up
chr17	43552465	43553092	-	1	627	PLEKHM1	hsa_circ_0044177	627	627	1	Cancer_specific	Exclusively_altered_in_GBM	-0.435311	0.0215762	0.101555	None	1.18918	1.58882e-06	3.17374e-05	Up	0.495535	0.010477	0.056042	None	0.44297	0.0152982	0.103506	None	0.576301	0.0217718	0.126565	None	-0.143142	0.511266	0.699349	None	0.529924	0.000619116	0.00342745	None
chr17	47388673	47389404	-	2	145,116	ZNF652	hsa_circ_0003258	731	261	1	Cancer_specific	Exclusively_altered_in_GC	-0.415231	0.0678875	0.212438	None	0.305012	0.281929	0.424112	None	-0.203881	0.389357	0.620128	None	-0.341916	0.246083	0.542782	None	-1.66971	0.00115943	0.023813	Down	-1.01298	0.0177742	0.0793741	None	-0.175799	0.581758	0.736334	None
chr17	49118861	49133843	-	3	151,95,71	SPAG9	hsa_circ_0002605	14982	317	1	Cancer_specific	Exclusively_altered_in_ESCC	1.2592	0.00123317	0.0137783	Up	0.744911	0.0142102	0.0420782	None	NA	NA	NA	NA	-0.166724	0.52124	0.762844	None	-0.0566492	0.931446	0.965007	None	-0.051414	0.903851	0.958051	None	0.520285	0.210242	0.354927	None
chr17	53108528	53124515	+	4	97,92,90,66	STXBP4	hsa_circ_0107139	15987	345	1	Cancer_specific	Exclusively_altered_in_GBM	-0.274584	0.389043	0.599559	None	1.31139	0.000245117	0.00165931	Up	-0.821091	0.0600015	0.179055	None	-0.0293755	0.936424	0.985557	None	-1.28978	0.0454473	0.184254	None	NA	NA	NA	NA	NA	NA	NA	NA
chr17	54926056	54933986	+	3	158,52,114	DGKE	hsa_circ_0000786	7930	324	2	circRNA_altered_in_2_cancer_types	Consistently_altered	-0.668892	0.0103631	0.0616478	None	-2.05187	1.24664e-05	0.000160722	Down	-1.38741	0.00251745	0.0190319	Down	NA	NA	NA	NA	-0.903175	0.148154	0.362909	None	NA	NA	NA	NA	NA	NA	NA	NA
chr17	59853761	59857762	-	2	162,141	BRIP1	hsa_circ_0006968	4001	303	1	Cancer_specific	Exclusively_altered_in_ESCC	2.79379	5.34805e-09	4.66082e-07	Up	NA	NA	NA	NA	NA	NA	NA	NA	NA	NA	NA	NA	NA	NA	NA	NA	NA	NA	NA	NA	NA	NA	NA	NA
chr17	60111147	60112969	-	2	198,146	MED13	hsa_circ_0004273	1822	344	1	Cancer_specific	Exclusively_altered_in_THCA	-0.339955	0.224303	0.443484	None	0.195956	0.390109	0.534699	None	0.12407	0.641469	0.814286	None	1.13432	4.57103e-08	4.1019e-06	Up	0.0373484	0.911014	0.958091	None	0.194401	0.528642	0.706446	None	-0.0271369	0.926758	0.961981	None
chr17	62817884	62818511	-	2	286,140	PLEKHM1P	hsa_circ_0045334	627	426	1	Cancer_specific	Exclusively_altered_in_CRC	-0.251821	0.442365	0.651923	None	NA	NA	NA	NA	0.835738	0.0396898	0.131708	None	NA	NA	NA	NA	1.31443	0.00991744	0.0872281	None	-0.123402	0.71753	0.835298	None	1.30769	3.77644e-06	4.33762e-05	Up
chr17	75398140	75398785	+	1	645	SEPT9	hsa_circ_0005320	645	645	1	Cancer_specific	Exclusively_altered_in_LUAD	0.619347	0.0816298	0.242386	None	1.07856	0.0265144	0.0687399	None	1.06412	0.00218821	0.0169961	Up	0.636246	0.0868118	0.32047	None	0.298867	0.382321	0.609691	None	0.669276	0.053636	0.177297	None	-0.11426	0.732243	0.846162	None
chr16	11114049	11154879	+	8	133,101,123,110,45,51,129,121	CLEC16A	hsa_circ_0000672	40830	813	1	Cancer_specific	Exclusively_altered_in_GBM	-0.0768686	0.786322	0.891711	None	1.02605	0.00177243	0.00843633	Up	0.387135	0.192083	0.386642	None	0.395668	0.105857	0.359342	None	0.309517	0.347691	0.584383	None	-0.438581	0.228603	0.444365	None	-0.44077	0.187779	0.327348	None
chr16	27224905	27226329	+	2	167,133	KDM8	hsa_circ_0038704	1424	300	1	Cancer_specific	Exclusively_altered_in_HCC	-0.647616	0.0380136	0.143726	None	-0.411084	0.124484	0.22869	None	-0.276497	0.307515	0.52677	None	-0.260903	0.248277	0.544371	None	-0.395333	0.179955	0.406069	None	-1.56544	4.99165e-10	8.91009e-08	Down	-0.296788	0.301615	0.459979	None
chr16	74949767	74950157	-	2	125,133	WDR59	hsa_circ_0004910	390	258	1	Cancer_specific	Exclusively_altered_in_ESCC	-1.14934	0.00717001	0.0471597	Down	NA	NA	NA	NA	NA	NA	NA	NA	NA	NA	NA	NA	NA	NA	NA	NA	NA	NA	NA	NA	NA	NA	NA	NA
chr15	41648236	41669502	+	5	102,110,188,158,109	NUSAP1	hsa_circ_0008346	21266	667	1	Cancer_specific	Exclusively_altered_in_ESCC	1.39409	0.00328128	0.0278989	Up	NA	NA	NA	NA	NA	NA	NA	NA	NA	NA	NA	NA	NA	NA	NA	NA	NA	NA	NA	NA	NA	NA	NA	NA
chr15	52161413	52194233	+	7	157,123,90,131,108,144,145	TMOD3	hsa_circ_0035292	32820	898	1	Cancer_specific	Exclusively_altered_in_ESCC	-1.07629	2.43364e-05	0.000662788	Down	0.161167	0.563769	0.686609	None	-0.837097	0.000268423	0.00310603	None	-0.133657	0.548106	0.779897	None	0.237889	0.581722	0.767252	None	-0.000465275	0.998891	0.998891	None	0.184953	0.479604	0.644894	None
chr15	52876941	52885933	-	3	200,69,159	FAM214A	hsa_circ_0103891	8992	428	1	Cancer_specific	Exclusively_altered_in_CRC	0.527918	0.27322	0.49452	None	0.339105	0.316572	0.46004	None	NA	NA	NA	NA	-0.522001	0.178002	0.469209	None	NA	NA	NA	NA	NA	NA	NA	NA	-1.45457	0.000765133	0.00408847	Down
chr15	56680669	56687032	+	5	49,83,176,83,174	TEX9	hsa_circ_0000603	6363	565	1	Cancer_specific	Exclusively_altered_in_GBM	-0.908055	0.00370404	0.0302019	None	1.35877	0.00322849	0.0131582	Up	NA	NA	NA	NA	0.0303968	0.912533	0.97181	None	-0.812593	0.194801	0.422861	None	NA	NA	NA	NA	NA	NA	NA	NA
chr15	63824845	63855207	+	6	61,84,82,83,114,114	USP3	hsa_circ_0002138	30362	538	2	circRNA_altered_in_2_cancer_types	Consistently_altered	0.425592	0.11833	0.298048	None	1.5234	0.000170139	0.00123401	Up	0.980478	0.000273128	0.00312856	None	0.0466819	0.860362	0.944399	None	0.58813	0.0766055	0.250239	None	1.04703	0.0022836	0.0185283	Up	0.456131	0.0865865	0.180572	None
chr15	66044716	66053776	-	3	250,333,79	DENND4A	hsa_circ_0035957	9060	662	1	Cancer_specific	Exclusively_altered_in_CRC	-0.413892	0.208804	0.423684	None	-0.122948	0.552902	0.679144	None	-0.545423	0.0160892	0.0751926	None	-0.58395	0.00173009	0.0218504	None	-0.48197	0.149454	0.364184	None	0.440936	0.145219	0.336928	None	-1.43272	3.44274e-07	5.87657e-06	Down
chr15	72338064	72338975	-	1	911	MYO9A	hsa_circ_0006509	911	911	1	Cancer_specific	Exclusively_altered_in_CRC	-0.663312	0.0642377	0.204876	None	-0.510695	0.0797041	0.163501	None	0.464624	0.192298	0.386642	None	0.498501	0.0655949	0.270797	None	-1.48108	0.00774637	0.0773341	None	NA	NA	NA	NA	-1.02288	0.0134697	0.0428788	Down
chr15	76152218	76165909	+	3	105,60,141	UBE2Q2	hsa_circ_0104568	13691	306	1	Cancer_specific	Exclusively_altered_in_GBM	0.437744	0.0113826	0.0663538	None	1.1146	0.00480173	0.0180305	Up	NA	NA	NA	NA	NA	NA	NA	NA	-0.504844	0.314286	0.555199	None	NA	NA	NA	NA	NA	NA	NA	NA
chr15	76584771	76588078	-	3	83,82,147	ETFA	hsa_circ_0003620	3307	312	1	Cancer_specific	Exclusively_altered_in_GBM	-0.154479	0.597232	0.770429	None	1.06384	0.0132839	0.0397701	Up	NA	NA	NA	NA	NA	NA	NA	NA	-0.63849	0.189587	0.41815	None	-0.489261	0.196592	0.397105	None	NA	NA	NA	NA
chr15	80390757	80415142	+	4	163,171,109,101	ZFAND6	hsa_circ_0000642	24385	544	1	Cancer_specific	Exclusively_altered_in_GBM	-0.253116	0.456969	0.662643	None	1.70283	1.3167e-09	2.11098e-07	Up	0.315154	0.253098	0.467449	None	-0.15993	0.496717	0.748326	None	0.239718	0.560182	0.756489	None	0.0905919	0.758684	0.864415	None	0.0194716	0.942833	0.968848	None
chr15	83819966	83832827	-	4	147,159,139,77	HDGFRP3	hsa_circ_0000646	12861	522	1	Cancer_specific	Exclusively_altered_in_ESCC	1.18601	0.00298775	0.0260383	Up	0.17591	0.620461	0.731543	None	NA	NA	NA	NA	NA	NA	NA	NA	NA	NA	NA	NA	NA	NA	NA	NA	NA	NA	NA	NA
chr15	94899365	94945248	+	9	165,131,187,94,103,103,102,75,120	MCTP2	hsa_circ_0000660	45883	1080	1	Cancer_specific	Exclusively_altered_in_THCA	0.61914	0.0433319	0.155727	None	NA	NA	NA	NA	0.258566	0.303707	0.523779	None	1.60581	1.11996e-11	3.81905e-09	Up	0.755319	0.182253	0.407598	None	NA	NA	NA	NA	0.641712	0.0615775	0.1393	None
chr15	94983404	95001475	+	3	123,42,110	MCTP2	hsa_circ_0003333	18071	275	1	Cancer_specific	Exclusively_altered_in_ESCC	1.14765	0.000584053	0.00765417	Up	NA	NA	NA	NA	NA	NA	NA	NA	NA	NA	NA	NA	NA	NA	NA	NA	NA	NA	NA	NA	NA	NA	NA	NA
chr14	21971315	21972024	-	2	405,218	METTL3	hsa_circ_0000523	709	623	1	Cancer_specific	Exclusively_altered_in_GBM	0.385396	0.0219019	0.102072	None	1.24378	1.8488e-10	6.43648e-08	Up	-0.231367	0.137624	0.313168	None	0.347629	0.0194359	0.120943	None	-0.365518	0.11963	0.323947	None	-0.134279	0.463689	0.665698	None	-0.49644	0.0143849	0.0449847	None
chr14	32559707	32563592	+	1	3885	ARHGAP5	hsa_circ_0031583	3885	3885	1	Cancer_specific	Exclusively_altered_in_HCC	0.028322	0.874417	0.933798	None	0.469295	0.224023	0.355201	None	0.633396	0.2114	0.415473	None	0.414935	0.182517	0.46937	None	-0.240998	0.63236	0.811175	None	1.4019	0.000632599	0.00698468	Up	0.111489	0.742058	0.853463	None
chr14	32559707	32586493	+	2	3885,145	ARHGAP5	hsa_circ_0031584	26786	4030	2	circRNA_altered_in_2_cancer_types	Consistently_altered	0.157507	0.349815	0.568593	None	-0.145159	0.492291	0.626913	None	1.23723	8.91629e-05	0.00118954	Up	-0.00626397	0.976509	0.994655	None	-0.0837318	0.773532	0.896847	None	1.34195	2.66951e-05	0.000727671	Up	0.452557	0.0498094	0.117723	None
chr14	35044961	35078948	-	9	87,40,76,106,96,124,122,111,105	SNX6	hsa_circ_0031607	33987	867	1	Cancer_specific	Exclusively_altered_in_ESCC	2.27324	9.53632e-05	0.002131	Up	NA	NA	NA	NA	NA	NA	NA	NA	NA	NA	NA	NA	0.603953	0.371618	0.600925	None	NA	NA	NA	NA	NA	NA	NA	NA
chr14	35055435	35078948	-	7	76,106,96,124,122,111,105	SNX6	hsa_circ_0031608	23513	740	1	Cancer_specific	Exclusively_altered_in_ESCC	1.94513	7.62992e-08	5.31958e-06	Up	0.501837	0.181536	0.306586	None	0.900672	0.00257203	0.0193158	None	-0.366665	0.32939	0.627101	None	0.635927	0.120523	0.323947	None	NA	NA	NA	NA	0.290949	0.307884	0.467724	None
chr14	36121010	36128402	-	4	69,111,109,59	RALGAPA1	hsa_circ_0004823	7392	348	2	circRNA_altered_in_2_cancer_types	Consistently_altered	-0.972284	0.00254536	0.0234117	None	-0.78089	0.00975137	0.0311456	None	NA	NA	NA	NA	0.532688	0.114965	0.374074	None	-1.59514	0.00302344	0.0448476	Down	NA	NA	NA	NA	-1.71401	0.0018158	0.00829597	Down
chr14	50292584	50298079	-	6	89,64,192,209,78,63	NEMF	hsa_circ_0101960	5495	695	1	Cancer_specific	Exclusively_altered_in_GC	-0.0937262	0.681118	0.826158	None	-0.188682	0.438818	0.581447	None	-1.10212	0.0334218	0.117761	None	0.646243	0.0897676	0.329148	None	-1.41892	0.00184733	0.0335209	Down	NA	NA	NA	NA	NA	NA	NA	NA
chr14	55168779	55169298	+	1	519	SAMD4A	hsa_circ_0004846	519	519	4	circRNA_altered_in_4_cancer_types	Inconsistently_altered	-0.352739	0.179706	0.383387	None	1.09956	6.85955e-05	0.000592791	Up	-0.588317	0.0944316	0.241183	None	2.04682	1.00204e-07	8.19345e-06	Up	-1.2165	0.00165102	0.0302524	Down	0.546004	0.152348	0.347232	None	-2.13043	8.33742e-06	8.46834e-05	Down
chr14	61262934	61285565	+	5	153,74,104,141,126	MNAT1	hsa_circ_0032116	22631	598	1	Cancer_specific	Exclusively_altered_in_ESCC	1.22864	0.000228222	0.00389992	Up	-0.0460794	0.861619	0.903209	None	-0.740976	0.17517	0.361169	None	-0.117083	0.740666	0.889348	None	NA	NA	NA	NA	NA	NA	NA	NA	NA	NA	NA	NA
chr14	62188226	62188541	+	2	146,85	HIF1A	hsa_circ_0007976	315	231	1	Cancer_specific	Exclusively_altered_in_GBM	0.473539	0.11971	0.300378	None	1.10463	0.00886911	0.0289732	Up	NA	NA	NA	NA	NA	NA	NA	NA	NA	NA	NA	NA	NA	NA	NA	NA	NA	NA	NA	NA
chr14	64465631	64489581	+	12	127,158,148,611,180,151,159,162,102,201,172,113	SYNE2	hsa_circ_0102377	23950	2284	1	Cancer_specific	Exclusively_altered_in_GBM	0.691704	0.00529563	0.0385479	None	2.04177	0.000101828	0.000824311	Up	0.371037	0.180226	0.368578	None	-0.661414	0.0190052	0.119186	None	0.72277	0.130584	0.339393	None	0.85781	0.0552289	0.180336	None	0.619902	0.0738387	0.16027	None
chr14	66028054	66028484	+	1	430	FUT8	hsa_circ_0003028	430	430	2	circRNA_altered_in_2_cancer_types	Inconsistently_altered	-0.416147	0.113744	0.290273	None	-1.20357	2.35505e-06	4.28303e-05	Down	1.53473	1.42964e-07	6.48484e-06	Up	0.525128	0.0290176	0.158574	None	0.184715	0.540822	0.74378	None	0.276036	0.493222	0.690511	None	-0.368335	0.136809	0.255529	None
chr14	76633005	76662315	+	8	65,177,80,68,40,115,86,95	GPATCH2L	hsa_circ_0005252	29310	726	1	Cancer_specific	Exclusively_altered_in_HCC	-0.0926048	0.781975	0.890002	None	-0.532635	0.187928	0.315197	None	-0.14597	0.656886	0.821234	None	0.0902333	0.776201	0.903631	None	0.386059	0.470909	0.684925	None	1.67552	0.00106124	0.00997003	Up	NA	NA	NA	NA
chr14	80963811	80997230	-	4	114,109,114,78	CEP128	hsa_circ_0007332	33419	415	1	Cancer_specific	Exclusively_altered_in_ESCC	1.17145	0.00136449	0.0148381	Up	0.870712	0.0104842	0.0329677	None	0.586651	0.02651	0.10122	None	0.037602	0.876901	0.954126	None	0.503159	0.206795	0.434758	None	1.21221	0.0153517	0.0740618	None	0.461944	0.139138	0.259484	None
chr14	81209418	81244390	-	4	193,60,177,165	CEP128	hsa_circ_0032822	34972	595	1	Cancer_specific	Exclusively_altered_in_ESCC	1.27178	0.00456899	0.0352378	Up	NA	NA	NA	NA	NA	NA	NA	NA	NA	NA	NA	NA	-0.868042	0.371017	0.600925	None	NA	NA	NA	NA	NA	NA	NA	NA
chr14	91409421	91467503	-	4	108,116,219,72	RPS6KA5	hsa_circ_0032940	58082	515	1	Cancer_specific	Exclusively_altered_in_GC	-0.120936	0.742901	0.867026	None	-0.976353	0.0170902	0.0483991	None	NA	NA	NA	NA	NA	NA	NA	NA	-3.21181	3.1765e-07	0.000117903	Down	NA	NA	NA	NA	NA	NA	NA	NA
chr14	92264128	92268765	-	5	117,101,76,92,168	TC2N	hsa_circ_0032969	4637	554	2	circRNA_altered_in_2_cancer_types	Consistently_altered	-0.266175	0.495664	0.69393	None	NA	NA	NA	NA	1.70623	1.03562e-06	3.01126e-05	Up	-0.569836	0.224826	0.527069	None	2.24625	0.000867889	0.0200257	Up	NA	NA	NA	NA	NA	NA	NA	NA
chr14	93760203	93762503	-	2	1080,188	BTBD7	hsa_circ_0000563	2300	1268	2	circRNA_altered_in_2_cancer_types	Consistently_altered	-0.251665	0.501473	0.700936	None	-0.726947	0.00660424	0.0230911	None	-0.60057	0.0705483	0.198556	None	-0.0270318	0.901663	0.964961	None	-1.39082	0.000407184	0.0133513	Down	NA	NA	NA	NA	-1.99102	1.52012e-08	3.89214e-07	Down
chr14	97299803	97327072	+	10	165,56,70,88,109,93,133,121,59,179	VRK1	hsa_circ_0000566	27269	1073	2	circRNA_altered_in_2_cancer_types	Consistently_altered	1.79277	1.42886e-09	1.55657e-07	Up	-0.450721	0.211654	0.341139	None	NA	NA	NA	NA	0.28701	0.441105	0.710616	None	1.08941	0.0207229	0.125553	None	NA	NA	NA	NA	1.3243	0.00148266	0.00714584	Up
chr14	99723807	99724176	-	1	369	BCL11B	hsa_circ_0033144	369	369	1	Cancer_specific	Exclusively_altered_in_CRC	-0.046304	0.842031	0.919011	None	NA	NA	NA	NA	0.71304	0.0275394	0.103753	None	0.156653	0.803353	0.922325	None	1.35274	0.0193984	0.12045	None	0.507785	0.265403	0.48467	None	1.98106	3.59719e-06	4.1908e-05	Up
chr14	104245081	104263855	-	3	77,120,148	PPP1R13B	hsa_circ_0005791	18774	345	1	Cancer_specific	Exclusively_altered_in_LUAD	0.782266	0.00135179	0.0148381	None	-0.810753	0.00235727	0.0104639	None	1.24254	0.000107307	0.0013987	Up	-0.921882	1.29526e-05	0.000433024	None	0.390042	0.306167	0.547061	None	0.584559	0.0278044	0.108099	None	0.344129	0.144151	0.266809	None
chr19	5047486	5082515	+	4	194,50,104,138	KDM4B	hsa_circ_0002926	35029	486	1	Cancer_specific	Exclusively_altered_in_GBM	0.532965	0.0165372	0.0842816	None	1.13637	0.00208762	0.00952739	Up	0.941956	0.00175268	0.0143992	None	-0.346401	0.193651	0.481305	None	0.336459	0.300122	0.54128	None	-0.345641	0.221453	0.435186	None	-0.119338	0.623522	0.763256	None
chr19	18285849	18286507	+	3	183,75,93	PIK3R2	hsa_circ_0005571	658	351	2	circRNA_altered_in_2_cancer_types	Consistently_altered	1.82383	4.9471e-07	2.69462e-05	Up	NA	NA	NA	NA	NA	NA	NA	NA	NA	NA	NA	NA	2.14173	0.000203653	0.00975968	Up	NA	NA	NA	NA	NA	NA	NA	NA
chr19	18648410	18649246	-	2	173,221	FKBP8	hsa_circ_0000914	836	394	1	Cancer_specific	Exclusively_altered_in_GBM	-0.0410765	0.826086	0.911118	None	1.26864	0.00044272	0.00271058	Up	-0.146805	0.518227	0.727313	None	0.163497	0.520678	0.762844	None	-0.431468	0.165045	0.384624	None	-0.248067	0.285139	0.504767	None	-0.346777	0.143777	0.266774	None
chr19	18650180	18650530	-	2	89,170	FKBP8	hsa_circ_0000915	350	259	1	Cancer_specific	Exclusively_altered_in_CRC	-0.976895	1.72863e-05	0.000516053	None	-0.915319	0.0154757	0.0451127	None	NA	NA	NA	NA	0.492824	0.288667	0.583841	None	-0.680527	0.125753	0.332435	None	NA	NA	NA	NA	-1.51604	0.00193053	0.00869091	Down
chr19	22157530	22171711	-	3	79,96,127	ZNF208	hsa_circ_0109301	14181	302	3	circRNA_altered_in_3_cancer_types	Consistently_altered	-1.50179	9.23828e-05	0.00209772	Down	-0.0398366	0.942617	0.959147	None	-1.30335	0.00588533	0.0360755	Down	0.313824	0.36015	0.651172	None	-1.88509	0.00826765	0.080354	None	NA	NA	NA	NA	-2.165	0.000312463	0.00186416	Down
chr19	58436990	58439415	-	1	2425	ZNF418	hsa_circ_0052318	2425	2425	3	circRNA_altered_in_3_cancer_types	Consistently_altered	-2.98938	4.93404e-09	4.58398e-07	Down	-0.598756	0.0400216	0.0943256	None	NA	NA	NA	NA	0.786432	0.0233362	0.136729	None	-2.29458	0.000625513	0.017449	Down	NA	NA	NA	NA	-3.2265	1.06323e-08	2.84067e-07	Down
chr19	58904342	58904854	+	2	210,129	RPS5	hsa_circ_0005598	512	339	1	Cancer_specific	Exclusively_altered_in_ESCC	1.50943	0.000551387	0.00739283	Up	NA	NA	NA	NA	NA	NA	NA	NA	NA	NA	NA	NA	NA	NA	NA	NA	NA	NA	NA	NA	NA	NA	NA	NA
chr18	2890558	2892484	+	1	1926	EMILIN2	hsa_circ_0004658	1926	1926	2	circRNA_altered_in_2_cancer_types	Consistently_altered	0.462254	0.145994	0.336811	None	NA	NA	NA	NA	0.144782	0.536472	0.737285	None	2.65244	1.00318e-15	8.55211e-13	Up	0.460615	0.311355	0.554212	None	1.99047	0.000105332	0.00179336	Up	0.343087	0.21249	0.357739	None
chr18	6263945	6312055	-	4	92,55,103,59	L3MBTL4	hsa_circ_0000824	48110	309	2	circRNA_altered_in_2_cancer_types	Consistently_altered	-1.31553	0.00409238	0.0327203	Down	-0.191284	0.617894	0.729912	None	NA	NA	NA	NA	-1.59951	0.0029239	0.0317532	Down	-1.01274	0.103449	0.297915	None	NA	NA	NA	NA	NA	NA	NA	NA
chr18	9775274	9815219	+	4	80,82,72,107	RAB31	hsa_circ_0008821	39945	341	2	circRNA_altered_in_2_cancer_types	Consistently_altered	-0.928998	0.0191078	0.0930364	None	0.776494	0.0123264	0.0375023	None	NA	NA	NA	NA	NA	NA	NA	NA	-1.97872	0.000393178	0.0131223	Down	NA	NA	NA	NA	-3.47457	1.61152e-11	1.0424e-09	Down
chr18	9931806	9937063	+	3	153,104,81	VAPA	hsa_circ_0006990	5257	338	1	Cancer_specific	Exclusively_altered_in_LUAD	0.273067	0.205053	0.418509	None	0.997362	0.0273972	0.0700597	None	1.4651	6.24792e-07	2.14701e-05	Up	0.342577	0.181848	0.469261	None	1.37739	0.00580813	0.0660491	None	0.48424	0.0848252	0.242261	None	NA	NA	NA	NA
chr18	12999419	13042333	+	11	168,126,176,53,121,149,136,42,65,127,131	CEP192	hsa_circ_0046999	42914	1294	3	circRNA_altered_in_3_cancer_types	Consistently_altered	1.50026	0.000112632	0.00233711	Up	NA	NA	NA	NA	0.56333	0.177556	0.364836	None	0.106709	0.745032	0.890231	None	1.98404	0.000190047	0.00974543	Up	1.8856	8.91601e-05	0.001649	Up	0.922465	0.00150467	0.00720662	None
chr18	21644103	21649235	+	3	49,129,115	TTC39C	hsa_circ_0000839	5132	293	1	Cancer_specific	Exclusively_altered_in_LUAD	-0.318984	0.155999	0.351754	None	0.331172	0.459433	0.601309	None	1.50337	3.71239e-06	8.59154e-05	Up	-0.349882	0.485465	0.740357	None	1.13238	0.0155859	0.108694	None	-0.08781	0.779525	0.878664	None	NA	NA	NA	NA
chr18	44470542	44483598	-	2	475,109	PIAS2	hsa_circ_0108510	13056	584	3	circRNA_altered_in_3_cancer_types	Inconsistently_altered	-0.327692	0.129386	0.313657	None	1.02603	7.86017e-05	0.000665112	Up	-0.202989	0.276025	0.49371	None	-0.318341	0.0931242	0.337176	None	-1.19303	9.5713e-05	0.00688029	Down	0.0883095	0.740754	0.8549	None	-1.11568	2.46802e-06	3.03319e-05	Down
chr18	44526019	44526886	+	2	219,70	KATNAL2	hsa_circ_0108513	867	289	1	Cancer_specific	Exclusively_altered_in_THCA	0.0115377	0.971147	0.984452	None	-0.136594	0.706317	0.800602	None	NA	NA	NA	NA	-1.20328	0.000115818	0.00270506	Down	NA	NA	NA	NA	NA	NA	NA	NA	NA	NA	NA	NA
chr18	45391429	45423180	-	5	75,135,194,90,289	SMAD2	hsa_circ_0000847	31751	783	1	Cancer_specific	Exclusively_altered_in_CRC	0.510564	0.0412241	0.15159	None	NA	NA	NA	NA	1.07017	0.0120014	0.0613045	None	-0.138895	0.540791	0.774831	None	1.34843	0.00525962	0.0639695	None	0.881633	0.0226145	0.0932359	None	1.02353	0.00401787	0.0156761	Up
chr18	51797729	51804225	+	3	126,165,153	POLI	hsa_circ_0047719	6496	444	1	Cancer_specific	Exclusively_altered_in_CRC	0.099265	0.804749	0.902043	None	0.622239	0.0367089	0.0882245	None	-0.145448	0.651566	0.816438	None	-0.902144	0.000221802	0.00450205	None	-1.07671	0.0213397	0.126565	None	NA	NA	NA	NA	-1.21707	0.0023284	0.01022	Down
chr18	56585502	56587865	+	1	2363	ZNF532	hsa_circ_0047814	2363	2363	1	Cancer_specific	Exclusively_altered_in_CRC	0.146409	0.648853	0.804375	None	0.0216419	0.937836	0.955479	None	0.171414	0.556066	0.755184	None	0.414165	0.125261	0.394769	None	-0.585101	0.144539	0.357713	None	NA	NA	NA	NA	-1.69367	1.0057e-06	1.37334e-05	Down
chr18	56601664	56621031	+	4	182,177,163,282	ZNF532	hsa_circ_0003423	19367	804	1	Cancer_specific	Exclusively_altered_in_ESCC	1.04437	6.12833e-06	0.000217994	Up	0.796368	6.22199e-05	0.000547401	None	0.0909975	0.640031	0.814286	None	0.0908282	0.523239	0.765114	None	0.610255	0.0585316	0.216197	None	0.590435	0.0759515	0.221851	None	0.147051	0.534651	0.696804	None
chr6	7176887	7189555	+	5	119,123,213,90,164	RREB1	hsa_circ_0001573	12668	709	1	Cancer_specific	Exclusively_altered_in_GBM	0.107504	0.630056	0.789688	None	1.72347	1.94433e-07	7.15816e-06	Up	0.153593	0.380522	0.611871	None	-0.0969901	0.492781	0.746133	None	0.272178	0.248757	0.483796	None	0.412698	0.049528	0.167333	None	0.305922	0.0609821	0.138315	None
chr6	47251673	47254331	-	2	495,652	TNFRSF21	hsa_circ_0001610	2658	1147	3	circRNA_altered_in_3_cancer_types	Consistently_altered	0.912844	0.000843005	0.0102752	None	-0.0759129	0.710195	0.801713	None	1.22638	1.73966e-05	0.000303503	Up	1.26884	3.41058e-05	0.00100259	Up	0.516136	0.181767	0.407342	None	1.34444	0.00329378	0.024134	Up	0.613865	1.26993e-05	0.000121261	None
chr6	76344422	76388643	+	11	105,71,146,298,230,168,34,195,227,110,117	SENP6	hsa_circ_0001613	44221	1701	1	Cancer_specific	Exclusively_altered_in_GC	-0.605437	0.035912	0.139409	None	-0.662701	0.0156735	0.0455805	None	0.0011732	0.997689	0.999452	None	-0.0167226	0.95804	0.992874	None	-2.07784	7.06602e-06	0.00132064	Down	0.115955	0.744734	0.858471	None	-0.43561	0.22307	0.368486	None
chr6	79752559	79770535	-	3	161,99,151	PHIP	hsa_circ_0001615	17976	411	1	Cancer_specific	Exclusively_altered_in_HCC	0.629574	0.00942526	0.0572412	None	-0.451745	0.0682986	0.14454	None	-0.157843	0.534056	0.736844	None	0.289484	0.231637	0.532265	None	0.380571	0.262503	0.500002	None	1.82826	1.102e-06	5.63521e-05	Up	0.506545	0.0437663	0.106936	None
chr6	87925620	87928449	+	3	155,79,136	ZNF292	hsa_circ_0004058	2829	370	1	Cancer_specific	Exclusively_altered_in_HCC	-0.0533469	0.765022	0.881318	None	0.882133	7.70822e-05	0.000654527	None	-0.247155	0.142314	0.317648	None	0.00948477	0.942045	0.987815	None	-0.595977	0.0737467	0.245126	None	1.1797	8.7779e-05	0.001649	Up	-0.920953	1.27279e-05	0.000121261	None
chr6	90571844	90581107	+	3	2246,3130,100	CASP8AP2	hsa_circ_0132667	9263	5476	1	Cancer_specific	Exclusively_altered_in_ESCC	1.09993	0.00019811	0.00345305	Up	0.0124115	0.958635	0.970293	None	0.926719	0.0373899	0.128097	None	0.166252	0.626737	0.823114	None	0.958919	0.0313183	0.15086	None	1.31288	0.0163342	0.076686	None	NA	NA	NA	NA
chr6	108984657	108986092	+	1	1435	FOXO3	hsa_circ_0006404	1435	1435	2	circRNA_altered_in_2_cancer_types	Consistently_altered	0.494355	0.0741144	0.227803	None	NA	NA	NA	NA	1.4887	0.000303645	0.00338797	Up	0.725846	0.0599295	0.254178	None	-0.0717839	0.858358	0.931632	None	1.17866	0.000338014	0.00446929	Up	0.505172	0.133349	0.251359	None
chr6	118832460	118887479	-	3	118,119,788	CEP85L	hsa_circ_0077736	55019	1025	2	circRNA_altered_in_2_cancer_types	Consistently_altered	-1.21242	0.00052288	0.00723317	Down	0.767656	0.0121033	0.0368696	None	-0.0323495	0.930696	0.974802	None	-0.226633	0.535112	0.77123	None	-0.768827	0.122408	0.326831	None	-1.07194	0.00546646	0.0352685	Down	-0.219121	0.541366	0.701835	None
chr6	136709530	136710655	-	2	118,164	MAP7	hsa_circ_0130789	1125	282	1	Cancer_specific	Exclusively_altered_in_GBM	0.412167	0.249434	0.470021	None	-2.25204	2.13808e-15	5.21051e-12	Down	NA	NA	NA	NA	NA	NA	NA	NA	NA	NA	NA	NA	NA	NA	NA	NA	NA	NA	NA	NA
chr6	136990420	137019820	-	5	113,171,107,169,194	MAP3K5	hsa_circ_0009034	29400	754	1	Cancer_specific	Exclusively_altered_in_CRC	0.222644	0.639464	0.797842	None	-0.255293	0.35624	0.499302	None	-0.459043	0.19684	0.39368	None	-0.102284	0.741283	0.889348	None	NA	NA	NA	NA	NA	NA	NA	NA	1.48846	8.85571e-05	0.000632771	Up
chr6	139264649	139265759	-	3	64,163,125	REPS1	hsa_circ_0004368	1110	352	1	Cancer_specific	Exclusively_altered_in_HCC	-0.682977	0.00026258	0.00431771	None	0.35006	0.0532734	0.119108	None	-0.078653	0.608504	0.800022	None	-0.0769712	0.680127	0.855815	None	-0.192672	0.496769	0.710199	None	-1.0553	1.10494e-06	5.63521e-05	Down	0.105891	0.634629	0.770711	None
chr6	144858717	144864006	+	3	136,150,76	UTRN	hsa_circ_0130908	5289	362	1	Cancer_specific	Exclusively_altered_in_ESCC	-1.14177	0.000891502	0.0106991	Down	NA	NA	NA	NA	-0.573503	0.0388053	0.131358	None	0.372574	0.151458	0.427544	None	0.451895	0.265638	0.504038	None	0.189212	0.558154	0.726346	None	-0.535779	0.207401	0.352511	None
chr6	148789680	148808851	+	4	41,87,113,102	SASH1	hsa_circ_0130986	19171	343	1	Cancer_specific	Exclusively_altered_in_ESCC	-2.11701	1.27713e-06	6.18344e-05	Down	0.336692	0.323179	0.465203	None	NA	NA	NA	NA	-0.7218	0.0426313	0.20591	None	NA	NA	NA	NA	NA	NA	NA	NA	NA	NA	NA	NA
chr6	149699153	149700654	+	1	1501	TAB2	hsa_circ_0078201	1501	1501	1	Cancer_specific	Exclusively_altered_in_CRC	0.705245	0.0531422	0.182696	None	-0.0973619	0.67501	0.775688	None	-0.0301804	0.921753	0.972081	None	0.371453	0.188586	0.474246	None	0.138568	0.726906	0.872007	None	0.611058	0.100754	0.267759	None	-1.25687	6.51981e-05	0.000485627	Down
chr6	158994451	159010814	+	5	104,56,91,122,111	TMEM181	hsa_circ_0004587	16363	484	1	Cancer_specific	Exclusively_altered_in_GC	0.164017	0.588308	0.767531	None	0.11694	0.659388	0.765569	None	0.614703	0.0395765	0.131708	None	0.0744688	0.835716	0.932928	None	1.52587	0.000520005	0.0149522	Up	0.446885	0.155112	0.350224	None	0.883301	4.62718e-05	0.000359924	None
chr6	159004985	159010814	+	3	91,122,111	TMEM181	hsa_circ_0001663	5829	324	2	circRNA_altered_in_2_cancer_types	Consistently_altered	0.368066	0.125911	0.308669	None	0.103894	0.702617	0.79715	None	0.628399	0.0253981	0.0993155	None	-0.119965	0.72961	0.884938	None	1.2488	0.00300192	0.0448476	Up	1.08244	0.00174997	0.0149283	Up	0.770179	0.00249005	0.010663	None
chr6	160103505	160109274	-	3	165,180,117	SOD2	hsa_circ_0004662	5769	462	1	Cancer_specific	Exclusively_altered_in_GBM	0.87842	0.00491365	0.0369155	None	1.73466	0.00111725	0.00569611	Up	NA	NA	NA	NA	NA	NA	NA	NA	0.44928	0.309829	0.553076	None	1.10073	0.0445985	0.154579	None	0.389054	0.31948	0.480588	None
chr6	161455290	161471011	+	2	191,1364	MAP3K4	hsa_circ_0078617	15721	1555	1	Cancer_specific	Exclusively_altered_in_HCC	0.774913	0.00190003	0.0185547	None	-0.148241	0.57874	0.699155	None	NA	NA	NA	NA	-0.681034	0.0299704	0.161197	None	0.423021	0.392586	0.616586	None	1.36347	0.000171538	0.00251667	Up	0.0811007	0.768704	0.867527	None
chr6	161469647	161471011	+	1	1364	MAP3K4	hsa_circ_0078619	1364	1364	1	Cancer_specific	Exclusively_altered_in_HCC	0.452885	0.168302	0.366863	None	-0.640902	0.0513241	0.115384	None	NA	NA	NA	NA	-0.12768	0.713374	0.880104	None	-1.21481	0.0269788	0.137447	None	1.37372	0.000895534	0.00896371	Up	-0.84023	0.0117921	0.038138	None
chrX	47705503	47755339	+	3	217,127,96	ZNF81	hsa_circ_0006364	49836	440	1	Cancer_specific	Exclusively_altered_in_GBM	-0.00327996	0.990773	0.994768	None	1.70702	0.00010043	0.000818927	Up	NA	NA	NA	NA	-0.409216	0.200464	0.492494	None	0.802818	0.108825	0.305855	None	0.78779	0.0150551	0.0739635	None	0.250395	0.399998	0.565704	None
chrX	53672262	53681075	-	4	153,207,99,69	HUWE1	hsa_circ_0001922	8813	528	2	circRNA_altered_in_2_cancer_types	Consistently_altered	0.106134	0.771658	0.883259	None	1.04992	0.00155982	0.00761778	Up	NA	NA	NA	NA	-0.0844389	0.811426	0.92523	None	NA	NA	NA	NA	NA	NA	NA	NA	1.12476	0.0046419	0.0174462	Up
chrX	107083899	107097934	+	2	716,96	MID2	hsa_circ_0002153	14035	812	2	circRNA_altered_in_2_cancer_types	Consistently_altered	0.375494	0.25906	0.479344	None	1.12026	0.00619779	0.0218266	Up	-0.242542	0.375077	0.608495	None	0.179226	0.424093	0.695769	None	-0.842978	0.0384607	0.165248	None	1.26136	8.21e-05	0.00162832	Up	-0.313874	0.221645	0.367118	None
chrX	107838738	107840798	+	3	93,71,192	COL4A5	hsa_circ_0091304	2060	356	1	Cancer_specific	Exclusively_altered_in_GBM	0.32356	0.575487	0.759904	None	-2.07017	6.03239e-05	0.00053458	Down	NA	NA	NA	NA	NA	NA	NA	NA	-0.647884	0.412745	0.630246	None	NA	NA	NA	NA	NA	NA	NA	NA
chrX	130883333	130928494	-	6	153,149,99,148,153,143	RP11-453F18__B.1	hsa_circ_0001944	45161	845	4	circRNA_altered_in_4_cancer_types	Consistently_altered	4.56588	6.64132e-13	1.97065e-10	Up	2.01439	6.31179e-05	0.000553303	Up	NA	NA	NA	NA	NA	NA	NA	NA	NA	NA	NA	NA	3.12537	0.000136444	0.00215966	Up	4.33581	8.44244e-07	1.19262e-05	Up
chr9	4286037	4286523	-	1	486	GLIS3	hsa_circ_0002874	486	486	2	circRNA_altered_in_2_cancer_types	Consistently_altered	1.96236	2.9477e-09	3.02226e-07	Up	2.15502	0.000472117	0.00284789	Up	0.306311	0.399948	0.62928	None	-0.705175	0.00211045	0.024646	None	0.345193	0.423986	0.638042	None	-0.167039	0.574573	0.738737	None	0.12025	0.719853	0.83699	None
chr9	6420911	6434173	+	2	231,260	UHRF2	hsa_circ_0002359	13262	491	1	Cancer_specific	Exclusively_altered_in_GBM	0.667997	0.0324773	0.132269	None	1.29555	0.00129593	0.00649833	Up	-0.166498	0.552142	0.750754	None	-0.202762	0.413006	0.688034	None	-0.273986	0.422973	0.638042	None	0.0361257	0.903361	0.958051	None	0.532491	0.044522	0.1075	None
chr9	14146687	14179779	-	4	119,121,69,54	NFIB	hsa_circ_0086376	33092	363	2	circRNA_altered_in_2_cancer_types	Consistently_altered	-0.414557	0.223808	0.443484	None	0.835146	0.000301827	0.00199337	None	-1.17656	0.000304738	0.00338797	Down	-0.235655	0.37543	0.657111	None	-1.20887	0.00726983	0.0734449	None	-1.32057	4.44e-05	0.00105672	Down	NA	NA	NA	NA
chr9	16435552	16437522	-	1	1970	BNC2	hsa_circ_0086414	1970	1970	4	circRNA_altered_in_4_cancer_types	Consistently_altered	-2.4837	6.78364e-13	1.97065e-10	Down	NA	NA	NA	NA	-1.09108	4.76273e-06	0.000100017	Down	0.520119	0.14399	0.416813	None	-2.79958	6.39016e-07	0.000170617	Down	NA	NA	NA	NA	-4.10296	3.32413e-26	4.08536e-23	Down
chr9	20819794	20823114	+	4	105,102,131,127	FOCAD	hsa_circ_0003295	3320	465	1	Cancer_specific	Exclusively_altered_in_CRC	0.70669	0.00442845	0.0346134	None	NA	NA	NA	NA	-0.0657675	0.847868	0.921399	None	-0.363531	0.132204	0.403941	None	0.993254	0.012457	0.0962074	None	0.318224	0.347262	0.563167	None	1.21392	1.47189e-06	1.94511e-05	Up
chr9	21476897	21477291	-	2	137,124	MIR31HG	hsa_circ_0008599	394	261	2	circRNA_altered_in_2_cancer_types	Inconsistently_altered	0.356371	0.441039	0.651923	None	-2.20272	3.55092e-05	0.000356982	Down	NA	NA	NA	NA	2.34302	0.00162846	0.0208761	Up	NA	NA	NA	NA	NA	NA	NA	NA	NA	NA	NA	NA
chr9	86292641	86293514	-	2	235,159	UBQLN1	hsa_circ_0001865	873	394	1	Cancer_specific	Exclusively_altered_in_CRC	0.407171	0.134254	0.320994	None	0.0675808	0.82253	0.878784	None	-0.195052	0.53189	0.736844	None	-0.0318925	0.926902	0.979773	None	-0.62897	0.15635	0.374342	None	-0.637026	0.0731019	0.217188	None	-1.05634	0.00309423	0.0125093	Down
chr9	87317073	87325706	+	4	75,72,69,155	NTRK2	hsa_circ_0139142	8633	371	1	Cancer_specific	Exclusively_altered_in_ESCC	1.33728	0.00649581	0.0440552	Up	0.342965	0.202715	0.332854	None	-1.57893	0.0537249	0.163774	None	0.0857839	0.647487	0.836698	None	0.846564	0.365074	0.599247	None	NA	NA	NA	NA	NA	NA	NA	NA
chr9	88233897	88248289	-	4	149,87,84,713	AGTPBP1	hsa_circ_0001868	14392	1033	2	circRNA_altered_in_2_cancer_types	Inconsistently_altered	-0.10201	0.679903	0.826158	None	-1.46623	2.12655e-09	3.04848e-07	Down	-0.816098	0.000288954	0.00327674	None	0.0239232	0.921534	0.977124	None	1.02857	0.000905171	0.0206313	Up	0.272258	0.445463	0.648672	None	0.355278	0.0936001	0.193335	None
chr9	88284399	88327481	-	7	94,132,147,64,68,125,65	AGTPBP1	hsa_circ_0087391	43082	695	1	Cancer_specific	Exclusively_altered_in_GC	0.503	0.155786	0.351729	None	-0.744526	0.00304234	0.0126522	None	-0.227839	0.479674	0.699769	None	0.683271	0.0511304	0.23124	None	1.17419	0.00143238	0.0270416	Up	0.771934	0.0474822	0.162471	None	0.113324	0.64891	0.78418	None
chr9	88920106	88924932	-	5	48,178,78,114,90	ZCCHC6	hsa_circ_0001869	4826	508	1	Cancer_specific	Exclusively_altered_in_LUAD	-0.0140502	0.944666	0.971418	None	0.783963	0.00981952	0.0312404	None	1.07983	4.37754e-06	9.54641e-05	Up	-0.104538	0.748244	0.890545	None	0.437386	0.153012	0.370441	None	-0.395272	0.169985	0.368529	None	0.526212	0.0188532	0.0551559	None
chr9	95018961	95032265	-	8	121,145,84,87,195,74,127,99	IARS	hsa_circ_0006702	13304	932	2	circRNA_altered_in_2_cancer_types	Consistently_altered	1.12946	0.000126622	0.00253681	Up	0.236074	0.376844	0.519145	None	NA	NA	NA	NA	0.0688461	0.820682	0.926664	None	0.834921	0.0714591	0.239779	None	0.835065	0.00582211	0.0371159	None	1.40144	5.10255e-05	0.00039194	Up
chr9	96233422	96261168	+	4	247,83,129,97	FAM120A	hsa_circ_0001875	27746	556	1	Cancer_specific	Exclusively_altered_in_CRC	0.109772	0.54564	0.737931	None	-0.0910224	0.587205	0.705962	None	0.511414	0.0185557	0.0818761	None	0.335411	0.0183782	0.116487	None	0.536552	0.054007	0.206419	None	-0.00940581	0.965309	0.988381	None	1.12314	6.94985e-08	1.49848e-06	Up
chr9	98740342	98766983	+	2	155,182	ERCC6L2	hsa_circ_0008720	26641	337	1	Cancer_specific	Exclusively_altered_in_GBM	0.772049	0.00119272	0.0134994	None	1.36999	1.22637e-05	0.000158972	Up	0.484794	0.158223	0.337265	None	0.0747592	0.833617	0.932683	None	-0.228575	0.575644	0.764211	None	0.281987	0.271103	0.491149	None	0.33579	0.406002	0.570167	None
chr9	99284787	99327765	-	11	98,160,139,231,88,63,67,77,93,76,91	CDC14B	hsa_circ_0087641	42978	1183	1	Cancer_specific	Exclusively_altered_in_THCA	-0.341181	0.255126	0.47509	None	0.197943	0.320934	0.463065	None	0.323855	0.20518	0.407486	None	-1.07454	1.73512e-06	8.70109e-05	Down	0.318772	0.371231	0.600925	None	-0.179825	0.615537	0.768345	None	0.447947	0.119052	0.231512	None
chr9	103261046	103279053	+	4	110,130,27,97	TMEFF1	hsa_circ_0004425	18007	364	2	circRNA_altered_in_2_cancer_types	Inconsistently_altered	1.59818	5.69794e-05	0.0013988	Up	-1.57236	3.12565e-10	7.61721e-08	Down	NA	NA	NA	NA	-0.401819	0.31256	0.608318	None	NA	NA	NA	NA	NA	NA	NA	NA	NA	NA	NA	NA
chr9	114289547	114296633	+	4	540,89,127,93	ZNF483	hsa_circ_0137709	7086	849	1	Cancer_specific	Exclusively_altered_in_CRC	-1.01209	0.0130511	0.0729103	None	-0.500049	0.0158333	0.0458809	None	-0.411641	0.281239	0.499557	None	-0.596023	0.00177758	0.0221224	None	-1.06708	0.0486569	0.192261	None	NA	NA	NA	NA	-2.65066	2.48525e-09	8.48438e-08	Down
chr9	115013208	115060196	-	6	175,111,165,147,170,76	PTBP3	hsa_circ_0003458	46988	844	1	Cancer_specific	Exclusively_altered_in_GC	0.96386	0.0188268	0.0924371	None	-0.0370967	0.913836	0.939255	None	NA	NA	NA	NA	NA	NA	NA	NA	2.38998	0.00086371	0.0200257	Up	NA	NA	NA	NA	NA	NA	NA	NA
chr9	115030328	115060196	-	3	147,170,76	PTBP3	hsa_circ_0003500	29868	393	4	circRNA_altered_in_4_cancer_types	Consistently_altered	0.989575	0.0107514	0.0633097	None	0.504105	0.150572	0.265324	None	2.04534	4.71431e-08	2.69698e-06	Up	0.613846	0.115231	0.374225	None	3.616	2.23052e-08	2.08442e-05	Up	1.24301	0.000434855	0.00511291	Up	2.60077	4.41646e-11	2.46719e-09	Up
chr22	32874967	32875262	+	1	295	FBXO7	hsa_circ_0008832	295	295	1	Cancer_specific	Exclusively_altered_in_CRC	-0.455104	0.0116826	0.0672037	None	-0.190812	0.305787	0.449067	None	-0.652058	0.0122994	0.0619888	None	0.275678	0.229764	0.531555	None	-0.64021	0.0678685	0.233415	None	-0.409817	0.0968209	0.261197	None	-1.38132	5.52929e-07	8.6019e-06	Down
chr22	36737414	36745300	-	2	157,352	MYH9	hsa_circ_0004470	7886	509	1	Cancer_specific	Exclusively_altered_in_HCC	0.876022	0.0100475	0.0599752	None	NA	NA	NA	NA	NA	NA	NA	NA	NA	NA	NA	NA	0.597149	0.208267	0.436036	None	1.10364	0.000664082	0.00718416	Up	-0.151407	0.679946	0.808176	None
chr22	41277773	41278181	+	1	408	XPNPEP3	hsa_circ_0008360	408	408	1	Cancer_specific	Exclusively_altered_in_GBM	0.78793	0.0214087	0.101125	None	1.18653	3.65032e-05	0.000364102	Up	-0.104256	0.762697	0.875838	None	0.0878541	0.757913	0.895525	None	-1.19531	0.00659617	0.0700469	None	0.054332	0.864068	0.934902	None	-0.343655	0.30523	0.464267	None
chr22	42204878	42209826	+	5	119,122,85,182,72	CCDC134	hsa_circ_0008806	4948	580	1	Cancer_specific	Exclusively_altered_in_HCC	0.525943	0.100028	0.271869	None	NA	NA	NA	NA	NA	NA	NA	NA	-0.334554	0.397452	0.670947	None	0.144908	0.802071	0.907967	None	1.24383	0.000125393	0.00203479	Up	0.929969	0.015142	0.0467208	None
chr22	46780439	46785396	-	3	144,184,210	CELSR1	hsa_circ_0063809	4957	538	1	Cancer_specific	Exclusively_altered_in_THCA	0.894796	0.0120116	0.0688693	None	NA	NA	NA	NA	NA	NA	NA	NA	-1.32424	0.0007431	0.0110173	Down	NA	NA	NA	NA	NA	NA	NA	NA	NA	NA	NA	NA
chr22	50810448	50832564	+	2	131,243	PPP6R2	hsa_circ_0001258	22116	374	2	circRNA_altered_in_2_cancer_types	Consistently_altered	0.552732	0.0132187	0.073611	None	0.372753	0.0486067	0.110809	None	1.19817	4.75657e-08	2.69698e-06	Up	-0.0676222	0.729266	0.884938	None	0.952	0.0018972	0.0340949	None	1.75619	9.50423e-13	3.39301e-10	Up	-0.196388	0.362656	0.526837	None
chr20	21306916	21349228	+	26	128,112,112,59,90,73,51,158,75,134,58,108,45,132,119,136,108,90,73,84,98,80,57,69,132,128	XRN2	hsa_circ_0059581	42312	2509	1	Cancer_specific	Exclusively_altered_in_ESCC	1.03492	0.00627655	0.043071	Up	NA	NA	NA	NA	NA	NA	NA	NA	0.0745678	0.834685	0.932683	None	NA	NA	NA	NA	NA	NA	NA	NA	NA	NA	NA	NA
chr20	46252654	46262380	+	6	173,101,175,189,102,141	NCOA3	hsa_circ_0001165	9726	881	1	Cancer_specific	Exclusively_altered_in_ESCC	1.06289	0.000351646	0.00533028	Up	-0.219224	0.472264	0.611535	None	NA	NA	NA	NA	0.00353969	0.991883	0.995972	None	-0.726863	0.162975	0.382184	None	NA	NA	NA	NA	NA	NA	NA	NA
chr20	50290691	50307358	-	4	161,77,76,81	ATP9A	hsa_circ_0004770	16667	395	1	Cancer_specific	Exclusively_altered_in_CRC	0.159075	0.572445	0.757035	None	-0.277558	0.397323	0.541542	None	NA	NA	NA	NA	-0.369075	0.362772	0.653073	None	-0.102814	0.865688	0.935784	None	NA	NA	NA	NA	1.75954	1.46454e-05	0.000136357	Up
chr20	54956488	54959380	-	3	139,192,55	AURKA	hsa_circ_0004887	2892	386	1	Cancer_specific	Exclusively_altered_in_ESCC	1.02292	0.0053078	0.0385479	Up	NA	NA	NA	NA	NA	NA	NA	NA	NA	NA	NA	NA	NA	NA	NA	NA	NA	NA	NA	NA	NA	NA	NA	NA
chr20	62407030	62422143	-	2	285,970	ZBTB46	hsa_circ_0002805	15113	1255	1	Cancer_specific	Exclusively_altered_in_GC	0.985928	0.000593737	0.00772301	None	0.552802	0.0263647	0.0684246	None	0.550659	0.00318762	0.0227344	None	0.373225	0.0146682	0.101037	None	1.55661	1.08431e-09	2.02658e-06	Up	0.429315	0.126535	0.309403	None	0.885013	0.000109639	0.000769979	None
chr21	16386664	16415895	-	2	123,80	NRIP1	hsa_circ_0004771	29231	203	1	Cancer_specific	Exclusively_altered_in_THCA	0.398346	0.0793058	0.237836	None	0.285685	0.350082	0.494007	None	NA	NA	NA	NA	2.20222	3.96783e-11	8.45643e-09	Up	0.563808	0.217906	0.446563	None	-0.376894	0.382927	0.591796	None	0.186422	0.528398	0.689386	None
chr21	36206706	36231875	-	2	192,105	RUNX1	hsa_circ_0002360	25169	297	1	Cancer_specific	Exclusively_altered_in_ESCC	3.04138	1.65801e-14	9.2648e-12	Up	NA	NA	NA	NA	NA	NA	NA	NA	NA	NA	NA	NA	NA	NA	NA	NA	NA	NA	NA	NA	NA	NA	NA	NA
chr7	17908029	17937069	-	8	84,89,102,122,122,90,103,113	SNX13	hsa_circ_0004671	29040	825	1	Cancer_specific	Exclusively_altered_in_GC	0.169813	0.552692	0.744468	None	0.906219	0.0023455	0.0104306	None	0.50009	0.0634314	0.185823	None	-0.246718	0.36901	0.654982	None	1.30108	0.00108633	0.0233374	Up	0.557836	0.0670041	0.208609	None	0.491097	0.0444807	0.1075	None
chr7	22306582	22357656	-	6	49,67,169,122,107,51	RAPGEF5	hsa_circ_0079557	51074	565	3	circRNA_altered_in_3_cancer_types	Inconsistently_altered	1.31605	0.00108316	0.012503	Up	-1.76651	4.84644e-06	7.61985e-05	Down	NA	NA	NA	NA	NA	NA	NA	NA	NA	NA	NA	NA	NA	NA	NA	NA	1.93056	5.90935e-07	9.07825e-06	Up
chr7	22330793	22357656	-	5	67,169,122,107,51	RAPGEF5	hsa_circ_0001681	26863	516	5	circRNA_altered_in_5_cancer_types	Inconsistently_altered	0.648018	0.0330403	0.133308	None	-1.9374	1.33306e-07	5.74428e-06	Down	2.62609	1.56352e-13	1.77303e-10	Up	2.78968	3.46594e-11	8.44203e-09	Up	1.81904	0.00248242	0.0414254	Up	0.521948	0.0692732	0.212544	None	1.53486	8.22103e-06	8.4197e-05	Up
chr7	22347957	22357656	-	4	169,122,107,51	RAPGEF5	hsa_circ_0133954	9699	449	6	circRNA_altered_in_6_cancer_types	Inconsistently_altered	0.577226	0.0640849	0.204876	None	-2.00306	6.6103e-07	1.75101e-05	Down	2.01179	2.76061e-10	5.21754e-08	Up	2.87551	5.0212e-20	8.56115e-17	Up	2.09515	0.00027227	0.0111325	Up	1.00893	0.00250041	0.0194054	Up	1.64406	2.44002e-06	3.02907e-05	Up
chr7	22999874	23030758	-	9	160,88,117,96,116,81,180,102,79	FAM126A	hsa_circ_0008951	30884	1019	1	Cancer_specific	Exclusively_altered_in_CRC	-0.0109522	0.960467	0.979575	None	0.570424	0.0397409	0.0937546	None	-0.718266	0.000613025	0.00579309	None	-0.0991721	0.774066	0.903631	None	-0.641883	0.0836622	0.261043	None	-0.444479	0.124871	0.307442	None	-1.5465	3.74506e-05	0.000300829	Down
chr7	24659670	24708279	+	9	169,119,153,153,228,132,100,69,162	MPP6	hsa_circ_0133989	48609	1285	1	Cancer_specific	Exclusively_altered_in_HCC	0.969667	0.00657653	0.044171	None	0.299925	0.352996	0.49639	None	0.876133	0.00635539	0.0379316	None	-0.446096	0.0684721	0.278913	None	-0.38946	0.332467	0.569908	None	1.2639	8.93016e-05	0.001649	Up	0.415569	0.191317	0.331167	None
chr7	24663284	24708279	+	8	119,153,153,228,132,100,69,162	MPP6	hsa_circ_0001686	44995	1116	3	circRNA_altered_in_3_cancer_types	Consistently_altered	0.907557	0.00185621	0.0183828	None	0.330415	0.283749	0.42606	None	1.14848	6.19661e-05	0.000846622	Up	-0.261383	0.148042	0.422799	None	0.63145	0.137791	0.351474	None	1.04996	2.26622e-05	0.000655978	Up	1.15448	5.97333e-06	6.43967e-05	Up
chr7	24663284	24720139	+	10	119,153,153,228,132,100,69,162,203,129	MPP6	hsa_circ_0001687	56855	1448	1	Cancer_specific	Exclusively_altered_in_HCC	0.136037	0.668901	0.817598	None	0.387082	0.245078	0.379691	None	0.692726	0.151114	0.328076	None	-0.630694	0.00861497	0.0683187	None	-0.677885	0.188907	0.417986	None	1.45481	0.000116874	0.00192572	Up	NA	NA	NA	NA
chr7	27668989	27689252	-	3	122,110,161	HIBADH	hsa_circ_0006773	20263	393	2	circRNA_altered_in_2_cancer_types	Consistently_altered	0.834037	0.000802232	0.00991695	None	1.20515	0.000182947	0.00130363	Up	-0.0204637	0.931423	0.974802	None	-0.115422	0.588135	0.806085	None	0.913113	0.0138555	0.101662	None	-0.25676	0.38243	0.591796	None	1.12932	2.29023e-06	2.87214e-05	Up
chr7	40027197	40041630	+	4	660,171,140,171	CDK13	hsa_circ_0001699	14433	1142	2	circRNA_altered_in_2_cancer_types	Consistently_altered	0.871218	6.10149e-05	0.00147707	None	0.38972	0.077075	0.159315	None	1.0975	0.000176352	0.00215035	Up	0.14007	0.542159	0.776138	None	-0.626563	0.0926773	0.278032	None	0.705393	0.00815963	0.0477539	None	1.06837	0.000632299	0.00346917	Up
chr7	42063066	42088295	-	6	141,114,214,202,147,206	GLI3	hsa_circ_0079948	25229	1024	1	Cancer_specific	Exclusively_altered_in_THCA	0.538891	0.190714	0.39845	None	0.256878	0.444663	0.58607	None	-0.602037	0.214917	0.420063	None	-1.20421	0.00329614	0.034478	Down	-1.39696	0.023488	0.13073	None	NA	NA	NA	NA	NA	NA	NA	NA
chr7	44684925	44687358	+	2	192,103	OGDH	hsa_circ_0003340	2433	295	1	Cancer_specific	Exclusively_altered_in_GBM	0.397973	0.237821	0.458036	None	-1.08682	0.000184065	0.00130777	Down	NA	NA	NA	NA	NA	NA	NA	NA	NA	NA	NA	NA	NA	NA	NA	NA	NA	NA	NA	NA
chr7	48258950	48288948	+	13	152,29,164,131,210,165,200,97,128,101,168,206,140	ABCA13	hsa_circ_0134407	29998	1891	1	Cancer_specific	Exclusively_altered_in_ESCC	2.58747	0.000111951	0.00233711	Up	NA	NA	NA	NA	NA	NA	NA	NA	NA	NA	NA	NA	NA	NA	NA	NA	NA	NA	NA	NA	NA	NA	NA	NA
chr7	74171151	74172333	+	2	42,42	GTF2I	hsa_circ_0006672	1182	84	2	circRNA_altered_in_2_cancer_types	Consistently_altered	0.540984	0.105831	0.276972	None	1.28534	0.00309278	0.0127964	Up	1.19894	0.000121675	0.00153845	Up	0.85059	0.00676523	0.0591524	None	0.328352	0.49647	0.710199	None	0.552467	0.158856	0.353711	None	NA	NA	NA	NA
chr7	77214859	77230123	+	4	39,72,60,143	PTPN12	hsa_circ_0003764	15264	314	2	circRNA_altered_in_2_cancer_types	Consistently_altered	0.336489	0.138467	0.325266	None	1.00547	0.00257731	0.0112397	Up	0.6813	0.0711191	0.199268	None	1.13095	0.000119492	0.00275316	Up	0.510185	0.391117	0.614949	None	NA	NA	NA	NA	-0.219124	0.595226	0.743327	None
chr7	80418621	80435074	-	6	223,145,70,115,143,120	SEMA3C	hsa_circ_0002714	16453	816	1	Cancer_specific	Exclusively_altered_in_CRC	0.792367	0.0417417	0.152818	None	NA	NA	NA	NA	NA	NA	NA	NA	NA	NA	NA	NA	-1.76195	0.00488694	0.0613203	None	NA	NA	NA	NA	-1.53718	2.74401e-05	0.000236653	Down
chr7	80418621	80440017	-	7	223,145,70,115,143,120,91	SEMA3C	hsa_circ_0004365	21396	907	3	circRNA_altered_in_3_cancer_types	Consistently_altered	0.436952	0.149104	0.341924	None	-1.73703	2.73901e-05	0.000286479	Down	-0.108192	0.67954	0.834566	None	NA	NA	NA	NA	-2.05869	0.000167765	0.00950158	Down	NA	NA	NA	NA	-1.01284	0.000483848	0.00281825	Down
chr7	99621041	99621930	+	2	514,154	ZKSCAN1	hsa_circ_0001727	889	668	2	circRNA_altered_in_2_cancer_types	Inconsistently_altered	0.0257261	0.875476	0.933798	None	0.831526	1.49095e-07	5.95645e-06	None	0.205154	0.0826948	0.219616	None	0.160945	0.227272	0.531547	None	1.10842	4.13027e-05	0.00515269	Up	-1.09536	1.39277e-06	6.48547e-05	Down	0.593701	3.46316e-05	0.000285653	None
chr7	100410368	100410830	-	2	248,114	EPHB4	hsa_circ_0001730	462	362	1	Cancer_specific	Exclusively_altered_in_CRC	0.554334	0.0169911	0.0851022	None	1.48662	0.049565	0.112467	None	-0.0915545	0.808842	0.896638	None	NA	NA	NA	NA	0.712044	0.0820036	0.258893	None	0.549148	0.0703575	0.212861	None	1.66271	3.54748e-05	0.000290657	Up
chr7	128845043	128846428	+	4	210,173,220,124	SMO	hsa_circ_0001742	1385	727	1	Cancer_specific	Exclusively_altered_in_GBM	0.469771	0.104158	0.276244	None	2.31337	9.76083e-08	4.77141e-06	Up	NA	NA	NA	NA	-0.237918	0.497514	0.748686	None	-1.00762	0.0239562	0.131302	None	0.893916	0.00119355	0.010833	None	-0.319983	0.382129	0.547623	None
chr7	131060182	131084192	+	5	70,143,89,110,193	MKLN1	hsa_circ_0001746	24010	605	1	Cancer_specific	Exclusively_altered_in_GBM	0.518829	0.046403	0.164726	None	1.14074	6.55194e-07	1.75101e-05	Up	-0.185304	0.457552	0.682715	None	-0.328682	0.133058	0.404393	None	0.802234	0.029617	0.14644	None	0.855033	0.00479979	0.0323306	None	0.838525	0.000256405	0.00159152	None
chr7	131071878	131084192	+	4	143,89,110,193	MKLN1	hsa_circ_0001747	12314	535	1	Cancer_specific	Exclusively_altered_in_GBM	-0.14315	0.652532	0.807787	None	1.34909	1.98558e-05	0.000226115	Up	0.0704018	0.77548	0.883813	None	0.264199	0.237421	0.535497	None	0.393272	0.314738	0.555213	None	0.239031	0.43929	0.644918	None	0.4065	0.0754999	0.162788	None
chr7	135262543	135277940	+	7	229,165,176,117,138,151,206	NUP205	hsa_circ_0001750	15397	1182	1	Cancer_specific	Exclusively_altered_in_GBM	0.694062	0.033769	0.13469	None	1.30718	1.4211e-06	2.93493e-05	Up	NA	NA	NA	NA	-0.445729	0.192139	0.478944	None	0.400191	0.351042	0.588479	None	0.216288	0.613499	0.766695	None	0.355595	0.195416	0.336367	None
chr7	136935976	136939721	-	3	162,174,116	PTN	hsa_circ_0003949	3745	452	1	Cancer_specific	Exclusively_altered_in_GBM	-1.03253	0.0295818	0.125148	None	1.71068	8.60713e-06	0.000118506	Up	NA	NA	NA	NA	NA	NA	NA	NA	-1.59649	0.0361098	0.162045	None	NA	NA	NA	NA	NA	NA	NA	NA
chr7	151917607	151935911	-	9	213,66,110,165,182,105,102,117,120	KMT2C	hsa_circ_0002810	18304	1180	1	Cancer_specific	Exclusively_altered_in_GBM	0.217735	0.462651	0.667314	None	1.45127	1.26955e-05	0.000161141	Up	NA	NA	NA	NA	0.22189	0.415402	0.688969	None	-0.227922	0.557072	0.754693	None	0.610721	0.0760219	0.221851	None	-0.589217	0.128388	0.244634	None
chr7	158552176	158557544	-	5	96,90,49,83,177	ESYT2	hsa_circ_0001776	5368	495	2	circRNA_altered_in_2_cancer_types	Consistently_altered	-1.10802	1.29885e-11	2.9729e-09	Down	0.0769036	0.806414	0.868802	None	-0.420791	0.000789605	0.00722107	None	0.110274	0.558461	0.784191	None	-0.729294	0.00553952	0.064338	None	-0.222913	0.367076	0.581566	None	-1.23897	3.72359e-09	1.20429e-07	Down
chr5	10415599	10417516	+	2	182,135	MARCH6	hsa_circ_0001467	1917	317	1	Cancer_specific	Exclusively_altered_in_CRC	-0.789194	0.0017807	0.0179408	None	-0.957903	0.000690735	0.00383802	None	-0.159586	0.604878	0.798007	None	0.151012	0.6052	0.815721	None	-0.639355	0.0798545	0.256792	None	0.187777	0.577166	0.740294	None	-1.10485	0.001507	0.00720662	Down
chr5	16779653	16783578	-	5	104,85,14,125,135	MYO10	hsa_circ_0128535	3925	463	2	circRNA_altered_in_2_cancer_types	Inconsistently_altered	1.17988	2.06544e-05	0.000590175	Up	NA	NA	NA	NA	-1.32347	1.56688e-05	0.000282039	Down	-0.0787509	0.810173	0.92523	None	-0.199738	0.757585	0.89108	None	NA	NA	NA	NA	NA	NA	NA	NA
chr5	41794104	41807540	-	6	76,73,49,95,115,108	OXCT1	hsa_circ_0004873	13436	516	1	Cancer_specific	Exclusively_altered_in_CRC	-0.0304286	0.932333	0.967591	None	-0.778829	0.0372868	0.089349	None	NA	NA	NA	NA	-0.886539	0.0125023	0.0907079	None	-0.148818	0.784629	0.899675	None	NA	NA	NA	NA	-1.61986	0.0013662	0.00679783	Down
chr5	43295853	43297268	-	2	166,165	HMGCS1	hsa_circ_0072391	1415	331	1	Cancer_specific	Exclusively_altered_in_HCC	-0.36093	0.224225	0.443484	None	0.000369847	0.998884	0.998884	None	0.198964	0.603414	0.797845	None	-0.648052	0.0250926	0.143087	None	0.99616	0.0666523	0.231119	None	-1.34356	4.17619e-05	0.00101652	Down	0.734028	0.0172188	0.0518674	None
chr5	52157280	52161651	+	4	113,89,112,128	ITGA1	hsa_circ_0004840	4371	442	2	circRNA_altered_in_2_cancer_types	Consistently_altered	-1.23864	0.00746383	0.0481831	Down	NA	NA	NA	NA	-0.690346	0.0950187	0.242138	None	NA	NA	NA	NA	-0.961635	0.0682203	0.233415	None	NA	NA	NA	NA	-1.89206	0.000119641	0.000830731	Down
chr5	56160560	56161804	+	3	201,117,149	MAP3K1	hsa_circ_0001485	1244	467	1	Cancer_specific	Exclusively_altered_in_GBM	-0.403839	0.03128	0.129185	None	1.56704	4.55642e-07	1.33783e-05	Up	0.0896798	0.585377	0.781882	None	0.70051	3.08531e-05	0.000956446	None	0.344923	0.210529	0.43764	None	-0.0673052	0.815335	0.90023	None	0.700743	0.000703088	0.00380659	None
chr5	63621012	63626233	+	2	226,126	RNF180	hsa_circ_0129323	5221	352	4	circRNA_altered_in_4_cancer_types	Inconsistently_altered	-1.47554	0.0014796	0.01563	Down	1.49583	7.81248e-10	1.46454e-07	Up	-1.07436	0.000407943	0.00420552	Down	-0.45888	0.0614196	0.257932	None	-0.614339	0.224733	0.456055	None	-1.25557	0.000499069	0.0056862	Down	-1.00632	0.094865	0.194426	None
chr5	64084777	64100213	+	4	70,80,31,158	CWC27	hsa_circ_0072654	15436	339	1	Cancer_specific	Exclusively_altered_in_GBM	-0.694562	0.0595152	0.196841	None	-1.37779	0.00207011	0.00948284	Down	NA	NA	NA	NA	NA	NA	NA	NA	NA	NA	NA	NA	NA	NA	NA	NA	NA	NA	NA	NA
chr5	64747301	64769779	-	6	146,84,212,169,365,376	ADAMTS6	hsa_circ_0072688	22478	1352	5	circRNA_altered_in_5_cancer_types	Consistently_altered	1.29626	0.000193991	0.00345305	Up	1.21497	0.00209157	0.00952739	Up	0.708168	0.0247694	0.0981907	None	NA	NA	NA	NA	1.54276	0.0013286	0.0258661	Up	3.87364	0.000159714	0.0024275	Up	1.48362	5.03713e-09	1.54766e-07	Up
chr5	65284462	65310553	+	6	48,198,118,79,90,57	ERBB2IP	hsa_circ_0001493	26091	590	1	Cancer_specific	Exclusively_altered_in_CRC	-0.149847	0.611603	0.777233	None	-0.134411	0.596059	0.712057	None	0.134878	0.485538	0.705331	None	0.150027	0.309689	0.606222	None	-0.274648	0.449752	0.663446	None	0.460838	0.0860905	0.243482	None	-1.1526	3.04382e-05	0.000256223	Down
chr5	65349233	65350779	+	1	1546	ERBB2IP	hsa_circ_0072732	1546	1546	1	Cancer_specific	Exclusively_altered_in_GBM	0.31225	0.184918	0.391156	None	1.20495	9.13428e-05	0.000757151	Up	0.0956713	0.620145	0.804628	None	0.620505	0.00743042	0.0624082	None	0.391258	0.258243	0.495033	None	0.0307783	0.904775	0.958051	None	0.411283	0.0301143	0.079058	None
chr5	68470703	68471364	+	2	237,141	CCNB1	hsa_circ_0001495	661	378	3	circRNA_altered_in_3_cancer_types	Consistently_altered	1.31089	5.57455e-05	0.00138806	Up	1.03718	0.0020915	0.00952739	Up	NA	NA	NA	NA	-0.580088	0.127733	0.398874	None	1.30391	0.026963	0.137447	None	NA	NA	NA	NA	1.85838	5.44261e-07	8.5756e-06	Up
chr5	78734832	78752841	-	4	140,93,132,157	HOMER1	hsa_circ_0006916	18009	522	1	Cancer_specific	Exclusively_altered_in_GC	0.667994	0.00997178	0.0597279	None	-0.438292	0.11084	0.210393	None	0.377517	0.32062	0.542661	None	-0.143843	0.531174	0.768805	None	-1.32205	0.0026773	0.0418907	Down	1.23354	0.024173	0.0969637	None	-0.851996	0.0562191	0.130119	None
chr5	82832825	82838087	+	1	5262	VCAN	hsa_circ_0073237	5262	5262	1	Cancer_specific	Exclusively_altered_in_GBM	1.16188	0.0148797	0.0795297	None	1.71192	0.000626274	0.00354113	Up	NA	NA	NA	NA	NA	NA	NA	NA	-0.37945	0.66385	0.833827	None	NA	NA	NA	NA	NA	NA	NA	NA
chr5	83356118	83362425	-	3	185,145,156	EDIL3	hsa_circ_0073244	6307	486	2	circRNA_altered_in_2_cancer_types	Consistently_altered	-0.0355558	0.933825	0.967591	None	-1.86941	2.75811e-09	3.36076e-07	Down	-0.871593	0.0326203	0.116503	None	NA	NA	NA	NA	-0.332431	0.602863	0.787387	None	NA	NA	NA	NA	-1.25208	0.00141611	0.00690633	Down
chr5	93978977	93990457	+	5	163,144,144,150,123	ANKRD32	hsa_circ_0130042	11480	724	1	Cancer_specific	Exclusively_altered_in_ESCC	1.21103	0.000416965	0.00619493	Up	NA	NA	NA	NA	NA	NA	NA	NA	NA	NA	NA	NA	NA	NA	NA	NA	NA	NA	NA	NA	NA	NA	NA	NA
chr5	95091099	95099324	+	2	366,113	RHOBTB3	hsa_circ_0007444	8225	479	1	Cancer_specific	Exclusively_altered_in_GC	-0.332191	0.0978182	0.269545	None	0.835945	9.77276e-08	4.77141e-06	None	-0.0424725	0.829289	0.908247	None	0.480487	0.0227708	0.13587	None	-1.47408	1.36847e-07	8.52556e-05	Down	-0.472144	0.00981524	0.0559155	None	-0.733547	0.00152985	0.00728755	None
chr5	109049220	109051965	+	2	255,145	MAN2A1	hsa_circ_0008058	2745	400	1	Cancer_specific	Exclusively_altered_in_GBM	0.00535202	0.981202	0.989146	None	-1.2199	1.20336e-06	2.6161e-05	Down	-0.0189058	0.934778	0.976094	None	0.00891323	0.976657	0.994655	None	-0.439981	0.166619	0.385887	None	0.018466	0.92967	0.969708	None	-0.293543	0.207663	0.352511	None
chr5	109049220	109065214	+	3	255,145,172	MAN2A1	hsa_circ_0001519	15994	572	1	Cancer_specific	Exclusively_altered_in_GBM	-0.0490508	0.814798	0.907641	None	-1.10099	1.10576e-06	2.44976e-05	Down	-0.130694	0.464612	0.690525	None	-0.50216	0.0124	0.0903508	None	-0.190401	0.508339	0.715559	None	0.108922	0.594276	0.756801	None	-0.199297	0.217953	0.363946	None
chr5	128440648	128442755	+	3	120,204,117	ISOC1	hsa_circ_0007067	2107	441	1	Cancer_specific	Exclusively_altered_in_THCA	0.328299	0.391227	0.601331	None	NA	NA	NA	NA	NA	NA	NA	NA	1.02558	0.0014269	0.0185715	Up	0.317994	0.509014	0.715559	None	-0.267655	0.397717	0.606411	None	NA	NA	NA	NA
chr5	135483520	135489852	+	2	75,572	SMAD5	hsa_circ_0007930	6332	647	2	circRNA_altered_in_2_cancer_types	Inconsistently_altered	-0.963286	0.000285197	0.00460277	None	-0.404345	0.0393487	0.0929623	None	-0.178669	0.520235	0.728329	None	-0.613462	0.00854096	0.0680483	None	-0.977251	0.00426489	0.0581831	None	1.23518	0.000794369	0.00818048	Up	-1.63715	1.11114e-08	2.90551e-07	Down
chr5	145197456	145205763	-	4	161,74,58,203	PRELID2	hsa_circ_0006528	8307	496	2	circRNA_altered_in_2_cancer_types	Consistently_altered	0.616908	0.111683	0.286269	None	0.207069	0.551007	0.6775	None	1.22184	0.00343585	0.024051	Up	-0.575105	0.027974	0.154355	None	0.716919	0.0804783	0.257558	None	0.14121	0.716608	0.835298	None	1.09425	0.000112823	0.000787837	Up
chr5	153413350	153414527	-	3	93,100,224	FAM114A2	hsa_circ_0001546	1177	417	1	Cancer_specific	Exclusively_altered_in_GBM	-0.33375	0.0247864	0.112215	None	1.38472	3.58222e-07	1.16398e-05	Up	-0.122776	0.473328	0.695789	None	-0.0848508	0.621579	0.820881	None	-0.196712	0.490665	0.70413	None	-0.128344	0.539285	0.712003	None	-0.161164	0.453549	0.617973	None
chr5	167915606	167924353	+	6	135,189,109,101,122,121	RARS	hsa_circ_0001551	8747	777	1	Cancer_specific	Exclusively_altered_in_CRC	0.208853	0.359382	0.576267	None	0.810429	0.00300223	0.012569	None	0.946831	0.000929413	0.00823401	None	0.256972	0.323295	0.621455	None	0.351907	0.440028	0.652709	None	0.334698	0.287421	0.506297	None	1.04129	2.13229e-05	0.00019269	Up
chr5	176636636	176639196	+	1	2560	NSD1	hsa_circ_0075161	2560	2560	1	Cancer_specific	Exclusively_altered_in_CRC	-0.355593	0.30395	0.521076	None	-0.674165	0.0552602	0.122649	None	0.199391	0.501344	0.716758	None	0.00284111	0.990284	0.995972	None	-1.05457	0.0242625	0.13154	None	0.26638	0.400926	0.607553	None	-1.50951	1.12647e-07	2.23295e-06	Down
chr5	179132679	179137066	+	6	174,74,59,142,82,193	CANX	hsa_circ_0001564	4387	724	1	Cancer_specific	Exclusively_altered_in_LUAD	0.656252	0.0644614	0.204876	None	0.212914	0.549966	0.676561	None	1.37507	7.31392e-06	0.000145509	Up	-0.521722	0.0566813	0.245907	None	0.908531	0.0525308	0.202016	None	0.557225	0.0490352	0.16672	None	0.211706	0.4758	0.641182	None
chr4	1219147	1235307	-	4	207,145,155,195	CTBP1	hsa_circ_0001386	16160	702	2	circRNA_altered_in_2_cancer_types	Consistently_altered	0.354782	0.199151	0.41128	None	1.38427	1.95577e-05	0.000224821	Up	0.254203	0.331395	0.555098	None	-0.207196	0.503944	0.752264	None	0.433121	0.235969	0.468679	None	-0.143217	0.632643	0.779656	None	1.13227	0.000640633	0.00349928	Up
chr4	1902352	1932497	+	5	626,163,167,483,145	WHSC1	hsa_circ_0002688	30145	1584	2	circRNA_altered_in_2_cancer_types	Consistently_altered	1.94752	0.00023137	0.00391532	Up	NA	NA	NA	NA	NA	NA	NA	NA	NA	NA	NA	NA	NA	NA	NA	NA	2.3902	1.67142e-05	0.000526497	Up	0.621526	0.167287	0.299703	None
chr4	1902352	1936989	+	6	626,163,167,483,145,119	WHSC1	hsa_circ_0001387	34637	1703	3	circRNA_altered_in_3_cancer_types	Consistently_altered	2.58706	0.000103262	0.00222205	Up	0.128729	0.768881	0.841384	None	NA	NA	NA	NA	-0.170514	0.709341	0.876065	None	2.05067	0.00280318	0.0425947	Up	3.52143	9.58522e-07	5.63521e-05	Up	NA	NA	NA	NA
chr4	4650703	4651269	+	2	133,170	STX18-AS1	hsa_circ_0009031	566	303	1	Cancer_specific	Exclusively_altered_in_CRC	-0.334327	0.358848	0.576147	None	-0.707548	0.0130955	0.0394973	None	NA	NA	NA	NA	-1.08925	0.0285006	0.156753	None	-0.450549	0.432056	0.644965	None	NA	NA	NA	NA	1.10019	0.013537	0.0428788	Up
chr4	30921774	30951837	+	2	217,96	PCDH7	hsa_circ_0126176	30063	313	2	circRNA_altered_in_2_cancer_types	Consistently_altered	-0.624331	0.0645308	0.204876	None	-0.517882	0.173336	0.294966	None	NA	NA	NA	NA	NA	NA	NA	NA	-2.4104	0.000240034	0.0111325	Down	NA	NA	NA	NA	-2.8721	1.10449e-05	0.000108593	Down
chr4	36230203	36231267	-	1	1064	ARAP2	hsa_circ_0069399	1064	1064	2	circRNA_altered_in_2_cancer_types	Consistently_altered	-0.530716	0.0300855	0.126055	None	1.58734	0.000137098	0.00103119	Up	0.134831	0.530135	0.7359	None	-0.647284	0.00853538	0.0680483	None	0.725653	0.198617	0.424731	None	0.605565	0.0451689	0.156051	None	1.25513	0.000164711	0.00107675	Up
chr4	37633006	37640126	-	3	139,237,58	RELL1	hsa_circ_0001400	7120	434	2	circRNA_altered_in_2_cancer_types	Inconsistently_altered	0.367285	0.0334959	0.134215	None	1.13735	0.00234193	0.0104306	Up	0.439442	0.351624	0.579868	None	0.178468	0.743058	0.889348	None	-1.99366	0.00267787	0.0418907	Down	0.188142	0.65739	0.795283	None	NA	NA	NA	NA
chr4	38091552	38104778	+	3	186,162,159	TBC1D1	hsa_circ_0001402	13226	507	2	circRNA_altered_in_2_cancer_types	Consistently_altered	-0.339161	0.137935	0.325015	None	0.61688	0.0291933	0.0730432	None	-0.238925	0.316627	0.537508	None	-0.103402	0.466411	0.72957	None	-1.13455	4.04395e-06	0.000839794	Down	-0.540766	0.0666544	0.208125	None	-1.03638	0.000120502	0.000832008	Down
chr4	39915230	39927553	-	5	116,141,81,127,98	PDS5A	hsa_circ_0007308	12323	563	1	Cancer_specific	Exclusively_altered_in_GBM	-0.405067	0.188395	0.395629	None	1.07049	0.0151794	0.0444083	Up	0.911142	0.00610981	0.0368538	None	-0.114197	0.750624	0.890615	None	0.427652	0.368739	0.600586	None	-0.818574	0.0236085	0.0957753	None	0.00779938	0.979038	0.988692	None
chr4	75040222	75091111	+	5	185,123,153,108,93	MTHFD2L	hsa_circ_0069982	50889	662	1	Cancer_specific	Exclusively_altered_in_THCA	0.972907	0.00624022	0.0429909	None	0.9042	0.00048221	0.00289445	None	NA	NA	NA	NA	1.18715	0.00363725	0.0371348	Up	0.0853763	0.86011	0.93191	None	-1.05445	0.0171438	0.0784931	None	0.731913	0.0709989	0.155539	None
chr4	76711302	76711950	+	2	89,155	USO1	hsa_circ_0007096	648	244	1	Cancer_specific	Exclusively_altered_in_LUAD	0.0110581	0.97598	0.984452	None	NA	NA	NA	NA	1.44235	2.41227e-05	0.000390788	Up	0.117791	0.754729	0.89362	None	NA	NA	NA	NA	-0.899475	0.0240943	0.0969637	None	NA	NA	NA	NA
chr4	77055327	77065626	-	3	188,144,84	NUP54	hsa_circ_0070039	10299	416	1	Cancer_specific	Exclusively_altered_in_GBM	0.278428	0.142926	0.330881	None	1.06463	3.2938e-05	0.000335858	Up	0.697507	0.0012775	0.0109749	None	0.143389	0.444721	0.712191	None	-0.126451	0.621767	0.803888	None	-0.0763936	0.716751	0.835298	None	0.158609	0.375385	0.540221	None
chr4	87685745	87689129	+	4	132,94,86,160	PTPN13	hsa_circ_0007948	3384	472	2	circRNA_altered_in_2_cancer_types	Consistently_altered	-0.306327	0.295135	0.512426	None	1.11291	4.60013e-05	0.000439628	Up	0.811763	0.0046877	0.0303763	None	0.33843	0.0517926	0.232998	None	-0.761846	0.0393125	0.167848	None	NA	NA	NA	NA	1.06778	0.00108078	0.00558102	Up
chr4	87693930	87696805	+	4	181,159,172,211	PTPN13	hsa_circ_0007324	2875	723	1	Cancer_specific	Exclusively_altered_in_LUAD	-0.425107	0.242664	0.461248	None	0.95604	0.00127893	0.0064263	None	1.77795	8.32827e-06	0.000160072	Up	0.860943	0.00310316	0.033276	None	NA	NA	NA	NA	NA	NA	NA	NA	NA	NA	NA	NA
chr4	95494501	95507595	+	5	43,92,18,173,37	PDLIM5	hsa_circ_0070467	13094	363	3	circRNA_altered_in_3_cancer_types	Inconsistently_altered	0.00208086	0.993481	0.996339	None	1.56172	0.000443792	0.00271058	Up	-0.384546	0.114292	0.282368	None	0.576697	0.0726373	0.29072	None	-1.07652	0.000345955	0.0123383	Down	-1.4469	1.22754e-09	1.31522e-07	Down	-0.62106	0.0236513	0.0651737	None
chr4	106155053	106158508	+	1	3455	TET2	hsa_circ_0070562	3455	3455	1	Cancer_specific	Exclusively_altered_in_GBM	0.0417571	0.858496	0.928052	None	1.28727	0.00186368	0.00875102	Up	0.421663	0.125094	0.298019	None	0.795176	9.80213e-06	0.000388666	None	-0.196341	0.508392	0.715559	None	0.0672014	0.798377	0.889058	None	-0.487275	0.0428243	0.105262	None
chr4	128590190	128609022	+	4	119,90,78,190	INTU	hsa_circ_0003390	18832	477	2	circRNA_altered_in_2_cancer_types	Consistently_altered	-0.546827	0.047146	0.166684	None	0.370083	0.197515	0.325989	None	-0.980842	0.000381491	0.00396891	None	0.331106	0.179741	0.469261	None	-1.1189	0.000198941	0.00975968	Down	NA	NA	NA	NA	-1.02229	2.4606e-05	0.000215432	Down
chr4	140046317	140060651	-	3	166,238,85	ELF2	hsa_circ_0001441	14334	489	1	Cancer_specific	Exclusively_altered_in_CRC	-0.709925	0.0019055	0.0185547	None	0.257073	0.259628	0.397476	None	-0.194833	0.485771	0.705331	None	-0.0364553	0.89242	0.959985	None	-0.587927	0.105199	0.300639	None	-0.327979	0.388902	0.598439	None	-1.40343	6.82743e-07	1.02328e-05	Down
chr4	140058783	140060651	-	2	238,85	ELF2	hsa_circ_0007466	1868	323	1	Cancer_specific	Exclusively_altered_in_CRC	-0.0854569	0.728918	0.8599	None	0.561935	0.113039	0.213712	None	-0.0780192	0.778836	0.885858	None	0.44672	0.151876	0.428015	None	-0.372919	0.313897	0.555059	None	0.146518	0.609399	0.764247	None	-1.32088	0.000175569	0.00113566	Down
chr4	140616350	140625350	+	3	71,82,181	MGST2	hsa_circ_0125390	9000	334	1	Cancer_specific	Exclusively_altered_in_ESCC	-1.59681	1.10125e-06	5.50486e-05	Down	NA	NA	NA	NA	NA	NA	NA	NA	NA	NA	NA	NA	-0.511661	0.379822	0.60778	None	-0.819581	0.0468541	0.160836	None	0.406705	0.297885	0.457626	None
chr4	148867767	148887990	+	4	88,59,106,160	ARHGAP10	hsa_circ_0006473	20223	413	2	circRNA_altered_in_2_cancer_types	Consistently_altered	-1.75478	7.26584e-08	5.27682e-06	Down	NA	NA	NA	NA	0.00426355	0.990344	0.998267	None	-0.560794	0.0507146	0.229969	None	-0.739306	0.0889008	0.270612	None	NA	NA	NA	NA	-1.58903	3.86229e-06	4.39514e-05	Down
chr4	151023629	151023964	+	1	335	DCLK2	hsa_circ_0005480	335	335	1	Cancer_specific	Exclusively_altered_in_CRC	-0.588596	0.114234	0.291096	None	0.864407	0.00258137	0.0112397	None	-0.144348	0.729823	0.857637	None	NA	NA	NA	NA	-1.41707	0.0045663	0.0605285	None	NA	NA	NA	NA	-2.40109	4.57456e-06	5.06498e-05	Down
chr4	151388824	151412187	-	4	113,116,103,118	LRBA	hsa_circ_0006867	23363	450	5	circRNA_altered_in_5_cancer_types	Inconsistently_altered	-3.88146	3.28778e-18	5.73061e-15	Down	2.27235	0.00378724	0.0148623	Up	NA	NA	NA	NA	-0.0141817	0.971769	0.994655	None	-2.28079	0.00155884	0.0291348	Down	1.71914	0.000770001	0.00800651	Up	-3.95006	1.28087e-18	3.14838e-16	Down
chr4	151656409	151729550	-	5	109,65,62,134,79	LRBA	hsa_circ_0071174	73141	449	1	Cancer_specific	Exclusively_altered_in_CRC	-0.669001	0.0623138	0.200862	None	-0.291799	0.183744	0.309602	None	0.139627	0.703554	0.84191	None	0.222662	0.398713	0.67241	None	0.170597	0.756479	0.890901	None	NA	NA	NA	NA	1.00932	0.00138173	0.00684737	Up
chr4	166141085	166184511	+	4	126,107,122,163	KLHL2	hsa_circ_0071375	43426	518	2	circRNA_altered_in_2_cancer_types	Inconsistently_altered	0.126151	0.545797	0.737931	None	-1.03698	2.10016e-05	0.000236825	Down	0.899111	0.00443141	0.0290475	None	0.959101	6.61171e-05	0.00170803	None	0.433988	0.247991	0.483796	None	-0.399968	0.108187	0.279664	None	1.1745	7.59661e-06	7.91207e-05	Up
chr4	178274461	178281831	+	2	421,175	NEIL3	hsa_circ_0001460	7370	596	3	circRNA_altered_in_3_cancer_types	Consistently_altered	0.151105	0.57034	0.757035	None	1.96093	0.000512433	0.00302373	Up	NA	NA	NA	NA	NA	NA	NA	NA	0.910966	0.123204	0.327686	None	1.7419	0.00111372	0.0102827	Up	1.73731	3.61827e-05	0.000294494	Up
chr4	186168447	186188309	+	4	85,217,173,187	SNX25	hsa_circ_0004874	19862	662	2	circRNA_altered_in_2_cancer_types	Consistently_altered	0.665292	0.0217327	0.101555	None	0.908449	0.00762172	0.0257465	None	1.75266	3.23562e-08	2.15835e-06	Up	1.66078	1.16867e-08	1.24537e-06	Up	0.662308	0.0941499	0.281096	None	0.834535	0.012381	0.0646834	None	0.802519	0.000936538	0.00491883	None
chr4	187627716	187630999	-	1	3283	FAT1	hsa_circ_0001461	3283	3283	1	Cancer_specific	Exclusively_altered_in_HCC	0.0134927	0.95525	0.977113	None	0.162771	0.479786	0.61766	None	0.713412	0.0583482	0.175746	None	-0.627066	0.0540992	0.240206	None	-0.700712	0.0444096	0.182021	None	1.43459	0.00446986	0.0302989	Up	-0.842907	0.00111566	0.00568942	None
chr3	3819408	3830758	-	4	79,82,199,161	SUMF1	hsa_circ_0003910	11350	521	1	Cancer_specific	Exclusively_altered_in_GBM	-0.425248	0.102678	0.274535	None	1.12704	0.00147241	0.00723441	Up	-0.431319	0.126161	0.299171	None	-0.334264	0.235811	0.535151	None	-0.385306	0.44833	0.662382	None	-0.369016	0.266094	0.48467	None	-0.0796393	0.790288	0.880566	None
chr3	5215701	5216099	+	2	68,71	ARL8B	hsa_circ_0001263	398	139	1	Cancer_specific	Exclusively_altered_in_GBM	-0.327895	0.116031	0.294812	None	1.07788	5.13893e-05	0.000477235	Up	0.623006	0.00264908	0.0194259	None	0.489256	0.0868371	0.32047	None	0.43212	0.21515	0.443273	None	-0.377926	0.155665	0.350246	None	-0.385231	0.147741	0.272224	None
chr3	18419661	18462483	-	8	156,213,455,112,124,127,177,235	SATB1	hsa_circ_0064555	42822	1599	1	Cancer_specific	Exclusively_altered_in_GBM	0.485827	0.27016	0.49074	None	-1.12956	0.00382883	0.0149773	Down	NA	NA	NA	NA	0.639132	0.0486588	0.224225	None	-0.468393	0.313751	0.555059	None	NA	NA	NA	NA	NA	NA	NA	NA
chr3	31617887	31621588	+	2	109,288	STT3B	hsa_circ_0001278	3701	397	1	Cancer_specific	Exclusively_altered_in_GBM	-0.154999	0.452989	0.660416	None	1.57082	2.90582e-06	5.1315e-05	Up	0.318237	0.138081	0.313168	None	-0.0521578	0.811875	0.92523	None	0.872246	0.00602791	0.0670605	None	0.685624	0.00175627	0.0149283	None	0.40595	0.0175728	0.0525473	None
chr3	56661064	56662642	-	3	109,160,123	FAM208A	hsa_circ_0001314	1578	392	1	Cancer_specific	Exclusively_altered_in_GBM	-0.838429	0.000762909	0.00956655	None	1.06168	3.557e-05	0.000356982	Up	0.210354	0.334777	0.559112	None	0.0403976	0.855012	0.941695	None	-0.0173274	0.957528	0.974382	None	0.029725	0.924187	0.966606	None	-0.0799111	0.76709	0.866501	None
chr3	56694758	56707753	-	10	104,104,106,32,125,162,92,73,93,146	FAM208A	hsa_circ_0001315	12995	1037	1	Cancer_specific	Exclusively_altered_in_HCC	0.106399	0.620657	0.78093	None	-0.125274	0.557512	0.68247	None	0.552943	0.0127692	0.0629576	None	-0.265195	0.166482	0.451002	None	0.498765	0.0617549	0.221535	None	1.22699	2.8394e-07	1.90063e-05	Up	0.672274	6.6234e-05	0.000487434	None
chr3	67546221	67559327	-	3	143,162,97	SUCLG2	hsa_circ_0004276	13106	402	1	Cancer_specific	Exclusively_altered_in_GBM	-0.199752	0.324289	0.542973	None	1.15585	1.05425e-06	2.44976e-05	Up	-0.0172539	0.922827	0.972081	None	-0.0984445	0.584339	0.801527	None	0.0460716	0.870718	0.937896	None	-0.28657	0.186381	0.3861	None	0.179802	0.383203	0.547623	None
chr3	71090478	71102924	-	4	205,154,90,138	FOXP1	hsa_circ_0008234	12446	587	2	circRNA_altered_in_2_cancer_types	Inconsistently_altered	0.0236794	0.935034	0.967591	None	-0.229842	0.425248	0.568787	None	-1.62454	6.55784e-06	0.000132796	Down	-0.0314896	0.93558	0.985424	None	-0.405932	0.177272	0.402578	None	1.98577	0.00045663	0.00525861	Up	-0.0212691	0.963811	0.981378	None
chr3	111632165	111639266	+	3	384,144,138	PHLDB2	hsa_circ_0001326	7101	666	1	Cancer_specific	Exclusively_altered_in_CRC	0.699974	0.0150133	0.079781	None	NA	NA	NA	NA	-0.557417	0.0704573	0.198556	None	0.790258	0.00462176	0.0452879	None	-0.859326	0.0380601	0.164296	None	-0.815601	0.00166859	0.0147691	None	-1.58551	8.11655e-06	8.38256e-05	Down
chr3	114069120	114070725	-	1	1605	ZBTB20	hsa_circ_0005332	1605	1605	1	Cancer_specific	Exclusively_altered_in_GBM	-0.0518814	0.834036	0.914292	None	1.45048	6.49678e-06	9.53775e-05	Up	0.433173	0.111007	0.276664	None	0.171381	0.393281	0.667185	None	-0.483399	0.0635329	0.224467	None	0.261782	0.153194	0.347608	None	-0.240456	0.292093	0.450983	None
chr3	123649948	123667979	-	7	133,219,83,142,517,95,237	CCDC14	hsa_circ_0121678	18031	1426	1	Cancer_specific	Exclusively_altered_in_ESCC	1.34029	0.00030717	0.00486725	Up	NA	NA	NA	NA	NA	NA	NA	NA	NA	NA	NA	NA	NA	NA	NA	NA	NA	NA	NA	NA	NA	NA	NA	NA
chr3	126340584	126366139	-	11	157,77,93,226,116,143,120,73,105,110,61	TXNRD3	hsa_circ_0008181	25555	1281	1	Cancer_specific	Exclusively_altered_in_ESCC	1.01526	0.00763296	0.0490932	Up	NA	NA	NA	NA	NA	NA	NA	NA	NA	NA	NA	NA	NA	NA	NA	NA	NA	NA	NA	NA	NA	NA	NA	NA
chr3	138289159	138290198	-	3	181,124,91	CEP70	hsa_circ_0002468	1039	396	1	Cancer_specific	Exclusively_altered_in_GBM	-0.0558491	0.780039	0.889796	None	1.28196	0.00339523	0.0136194	Up	0.868285	0.0261813	0.100643	None	-0.21087	0.402269	0.676398	None	-0.792828	0.0832768	0.260544	None	-0.240052	0.483026	0.680906	None	-0.293608	0.426006	0.591594	None
chr3	138289159	138291826	-	4	181,124,91,126	CEP70	hsa_circ_0003823	2667	522	1	Cancer_specific	Exclusively_altered_in_GBM	0.129059	0.567233	0.754995	None	1.68012	1.01088e-06	2.40777e-05	Up	0.0550895	0.820835	0.903715	None	-0.367682	0.0977823	0.343238	None	-0.0577712	0.835883	0.92169	None	-0.513817	0.00750629	0.0446624	None	-0.472687	0.00737802	0.0255425	None
chr3	145820541	145842016	-	6	98,64,113,164,137,92	PLOD2	hsa_circ_0067682	21475	668	1	Cancer_specific	Exclusively_altered_in_GBM	0.909006	0.00553409	0.0396952	None	1.38861	0.000784123	0.00427563	Up	NA	NA	NA	NA	0.136767	0.569248	0.790365	None	-0.286098	0.582109	0.767252	None	0.758648	0.0702232	0.212861	None	NA	NA	NA	NA
chr3	145838898	145842016	-	2	137,92	PLOD2	hsa_circ_0122319	3118	229	1	Cancer_specific	Exclusively_altered_in_GBM	0.802188	0.000196746	0.00345305	None	1.08546	1.00214e-06	2.40777e-05	Up	0.709136	0.0119001	0.0613045	None	0.330777	0.0296151	0.160761	None	-0.469271	0.202739	0.429128	None	0.589701	0.0115707	0.0616527	None	-0.625821	0.0316647	0.0817561	None
chr3	149563797	149613347	+	4	130,81,126,88	RNF13	hsa_circ_0067717	49550	425	1	Cancer_specific	Exclusively_altered_in_ESCC	1.39614	0.00111821	0.0127388	Up	-0.0505902	0.884289	0.919767	None	NA	NA	NA	NA	NA	NA	NA	NA	0.851117	0.125296	0.331697	None	-0.599226	0.0938182	0.255023	None	NA	NA	NA	NA
chr3	149563797	149629870	+	6	130,81,126,88,91,106	RNF13	hsa_circ_0003502	66073	622	1	Cancer_specific	Exclusively_altered_in_ESCC	1.17945	0.000369672	0.00555465	Up	NA	NA	NA	NA	0.249828	0.473676	0.695789	None	0.0564258	0.894979	0.961382	None	1.45788	0.0116603	0.0947721	None	0.0181216	0.943805	0.974749	None	0.677724	0.152976	0.278942	None
chr3	149563797	149639014	+	7	130,81,126,88,91,106,94	RNF13	hsa_circ_0001346	75217	716	2	circRNA_altered_in_2_cancer_types	Consistently_altered	1.33554	4.85028e-08	3.80402e-06	Up	0.0746585	0.721224	0.807589	None	0.544256	0.00123729	0.0107106	None	0.132967	0.264813	0.560694	None	1.15131	0.000192927	0.00974543	Up	-0.246714	0.223501	0.436805	None	0.674857	0.00239184	0.0103872	None
chr3	155547476	155551830	-	3	216,118,185	SLC33A1	hsa_circ_0001350	4354	519	1	Cancer_specific	Exclusively_altered_in_GBM	0.70115	0.0605941	0.198897	None	1.18083	0.000360026	0.002315	Up	0.622906	0.0169927	0.0770787	None	0.0932053	0.699849	0.868445	None	0.880664	0.0265387	0.137398	None	NA	NA	NA	NA	0.652976	0.0541845	0.126123	None
chr3	155611306	155629068	+	6	182,115,98,104,194,166	GMPS	hsa_circ_0122484	17762	859	1	Cancer_specific	Exclusively_altered_in_ESCC	1.03553	0.0037081	0.0302019	Up	-0.470135	0.198248	0.32666	None	NA	NA	NA	NA	NA	NA	NA	NA	NA	NA	NA	NA	NA	NA	NA	NA	0.0335114	0.931797	0.964767	None
chr3	170077486	170079217	+	1	1731	SKIL	hsa_circ_0067938	1731	1731	3	circRNA_altered_in_3_cancer_types	Consistently_altered	1.38223	2.12617e-14	9.2648e-12	Up	0.238239	0.482987	0.619788	None	0.55874	0.0379695	0.129302	None	1.2233	1.14071e-05	0.000422807	Up	0.861277	0.0233938	0.13073	None	0.52976	0.108367	0.279664	None	1.14412	1.37393e-05	0.000129889	Up
chr3	170077486	170109048	+	5	1731,98,233,242,225	SKIL	hsa_circ_0122687	31562	2529	1	Cancer_specific	Exclusively_altered_in_ESCC	1.64131	7.40388e-06	0.000258099	Up	NA	NA	NA	NA	NA	NA	NA	NA	NA	NA	NA	NA	NA	NA	NA	NA	NA	NA	NA	NA	NA	NA	NA	NA
chr3	171969049	172028671	+	6	282,59,152,60,139,54	FNDC3B	hsa_circ_0003692	59622	746	2	circRNA_altered_in_2_cancer_types	Consistently_altered	1.20792	0.00103546	0.0121128	Up	2.24021	4.40487e-07	1.30911e-05	Up	0.618483	0.0259363	0.10004	None	-0.116109	0.662833	0.849083	None	-0.970804	0.0324794	0.154071	None	0.676799	0.0390605	0.139912	None	0.171171	0.568622	0.724934	None
chr3	179131199	179137293	-	5	202,67,163,64,107	GNB4	hsa_circ_0001364	6094	603	2	circRNA_altered_in_2_cancer_types	Inconsistently_altered	0.214493	0.464018	0.667314	None	1.05037	0.000492441	0.00292702	Up	-0.644309	0.00854623	0.0479773	None	0.0232311	0.935354	0.985424	None	-0.826367	0.0616178	0.221469	None	NA	NA	NA	NA	-1.16528	0.00127881	0.00638883	Down
chr3	183361267	183369064	+	2	63,981	KLHL24	hsa_circ_0001367	7797	1044	1	Cancer_specific	Exclusively_altered_in_CRC	-0.351018	0.207503	0.422028	None	-0.954736	4.55991e-05	0.0004375	None	-0.437718	0.0305453	0.112098	None	-0.549235	0.00633415	0.0568407	None	-0.538182	0.0665816	0.231119	None	0.395487	0.116514	0.294328	None	-1.08284	1.29668e-06	1.75123e-05	Down
chr3	183361267	183390272	+	6	63,981,185,119,189,189	KLHL24	hsa_circ_0001368	29005	1726	2	circRNA_altered_in_2_cancer_types	Consistently_altered	0.115329	0.731022	0.860345	None	-1.57268	4.06989e-07	1.23979e-05	Down	-0.434103	0.126886	0.299769	None	-0.545252	0.0235235	0.137039	None	-0.921986	0.057441	0.214286	None	0.234727	0.589269	0.752214	None	-1.27128	4.2039e-06	4.74e-05	Down
chr3	183368083	183369064	+	1	981	KLHL24	hsa_circ_0001369	981	981	2	circRNA_altered_in_2_cancer_types	Consistently_altered	-0.547083	0.135625	0.321825	None	-1.46126	7.50946e-08	4.06679e-06	Down	-0.619062	0.0916576	0.237305	None	0.0668671	0.816791	0.92523	None	-0.998539	0.0361792	0.162045	None	0.368497	0.513901	0.699349	None	-2.05167	6.2385e-07	9.46557e-06	Down
chr3	183368083	183390272	+	5	981,185,119,189,189	KLHL24	hsa_circ_0006667	22189	1663	2	circRNA_altered_in_2_cancer_types	Consistently_altered	0.672412	0.129259	0.313657	None	-1.39191	0.000101954	0.000824311	Down	-0.841338	0.0359167	0.123798	None	-0.376385	0.256485	0.552854	None	-1.63803	0.0116047	0.0947721	None	NA	NA	NA	NA	-1.616	2.35631e-05	0.000209848	Down
chr3	195415403	195416309	+	2	265,100	LINC00969	hsa_circ_0008267	906	365	1	Cancer_specific	Exclusively_altered_in_GBM	-0.416837	0.121029	0.301361	None	1.12706	0.000104975	0.000836023	Up	0.106731	0.744536	0.865622	None	-0.1805	0.550082	0.780274	None	-0.599964	0.136714	0.350437	None	-0.157108	0.627675	0.776259	None	-0.475689	0.125324	0.240577	None
chr3	196807921	196846401	-	6	67,177,115,103,157,121	DLG1	hsa_circ_0007203	38480	740	1	Cancer_specific	Exclusively_altered_in_ESCC	1.6566	3.63893e-07	2.04602e-05	Up	-0.869799	0.00806189	0.0268213	None	NA	NA	NA	NA	NA	NA	NA	NA	NA	NA	NA	NA	NA	NA	NA	NA	NA	NA	NA	NA
chr3	196817782	196846401	-	4	115,103,157,121	DLG1	hsa_circ_0008583	28619	496	1	Cancer_specific	Exclusively_altered_in_GBM	0.561858	0.0999268	0.271869	None	-1.05402	0.00288509	0.0122491	Down	NA	NA	NA	NA	NA	NA	NA	NA	1.72817	0.0534845	0.204841	None	NA	NA	NA	NA	NA	NA	NA	NA
chr3	196831773	196846401	-	3	103,157,121	DLG1	hsa_circ_0008500	14628	381	1	Cancer_specific	Exclusively_altered_in_CRC	-0.178684	0.465551	0.668965	None	-0.417938	0.0630582	0.135873	None	NA	NA	NA	NA	-0.209395	0.414249	0.688397	None	0.248209	0.566912	0.758996	None	0.301513	0.306769	0.525355	None	1.01919	0.000495233	0.00285747	Up
chr2	15601324	15618413	-	9	137,105,79,141,152,126,258,194,64	NBAS	hsa_circ_0008083	17089	1256	1	Cancer_specific	Exclusively_altered_in_HCC	-0.202839	0.472429	0.672243	None	-0.101146	0.64782	0.755191	None	0.507567	0.0686081	0.195974	None	-0.291275	0.178052	0.469209	None	0.432797	0.240914	0.476269	None	1.52093	0.00170467	0.0149034	Up	0.241414	0.44016	0.606454	None
chr2	24357988	24369956	+	4	69,81,88,157	FAM228B	hsa_circ_0000982	11968	395	1	Cancer_specific	Exclusively_altered_in_CRC	-0.188905	0.420302	0.63154	None	-0.214361	0.35153	0.494903	None	-0.440446	0.115557	0.284804	None	0.344445	0.143803	0.416813	None	-1.11974	0.00831925	0.080354	None	0.0143274	0.974542	0.991201	None	-1.19192	0.00141045	0.00690615	Down
chr2	32602655	32620661	+	5	182,138,194,112,83	BIRC6	hsa_circ_0053441	18006	709	1	Cancer_specific	Exclusively_altered_in_GBM	0.407741	0.125412	0.307878	None	-1.2105	5.44227e-07	1.51691e-05	Down	NA	NA	NA	NA	-0.688648	0.0232003	0.136402	None	-0.187418	0.753945	0.889587	None	0.00457107	0.991213	0.998423	None	0.054016	0.866137	0.922092	None
chr2	37543379	37544322	-	1	943	PRKD3	hsa_circ_0000992	943	943	1	Cancer_specific	Exclusively_altered_in_GBM	0.62451	0.0128466	0.0722312	None	1.28607	0.000628666	0.00354643	Up	0.696959	1.5033e-05	0.000276614	None	0.530622	0.0439536	0.211101	None	0.217706	0.396205	0.617089	None	0.454671	0.122763	0.30435	None	0.0609225	0.744641	0.853801	None
chr2	40655612	40657444	-	1	1832	SLC8A1	hsa_circ_0000994	1832	1832	1	Cancer_specific	Exclusively_altered_in_CRC	-0.569282	0.00658737	0.044171	None	-0.243785	0.156735	0.273222	None	-0.335446	0.026643	0.101386	None	0.449185	0.146052	0.418519	None	-1.00569	0.0190455	0.119351	None	-0.458323	0.16224	0.358127	None	-2.05139	4.071e-14	5.00326e-12	Down
chr2	45773870	45780869	-	4	108,91,158,108	SRBD1	hsa_circ_0005542	6999	465	2	circRNA_altered_in_2_cancer_types	Consistently_altered	1.25159	0.00012576	0.00253681	Up	NA	NA	NA	NA	0.210413	0.568486	0.765633	None	-0.14259	0.676084	0.855423	None	0.887372	0.0669393	0.231473	None	NA	NA	NA	NA	1.35012	1.35277e-06	1.80712e-05	Up
chr2	63206322	63223901	+	5	148,125,139,107,124	EHBP1	hsa_circ_0005552	17579	643	2	circRNA_altered_in_2_cancer_types	Consistently_altered	-0.0891983	0.728046	0.8599	None	0.520045	0.174718	0.296716	None	NA	NA	NA	NA	NA	NA	NA	NA	-2.61498	4.99339e-05	0.00515269	Down	-1.09868	0.00406248	0.0284374	Down	NA	NA	NA	NA
chr2	64083439	64085070	+	2	128,108	UGP2	hsa_circ_0001020	1631	236	1	Cancer_specific	Exclusively_altered_in_HCC	0.608595	0.0200865	0.0961836	None	0.691608	0.026046	0.0677674	None	-0.134016	0.610796	0.800089	None	-0.264875	0.350915	0.644037	None	0.944639	0.0117347	0.0947721	None	-1.45979	7.13565e-12	1.91057e-09	Down	0.298399	0.217338	0.363946	None
chr2	64778576	64780543	+	1	1967	AFTPH	hsa_circ_0001021	1967	1967	1	Cancer_specific	Exclusively_altered_in_LUAD	0.176303	0.431442	0.643287	None	NA	NA	NA	NA	1.21015	0.000109247	0.0014078	Up	0.0899887	0.719831	0.884649	None	0.922506	0.0338343	0.158459	None	0.700994	0.00631899	0.0392041	None	0.114523	0.630206	0.767615	None
chr2	72945231	72960247	-	4	205,46,91,48	EXOC6B	hsa_circ_0009043	15016	390	1	Cancer_specific	Exclusively_altered_in_CRC	-0.208111	0.162076	0.359414	None	-0.687877	5.79332e-05	0.000519874	None	-0.786243	1.94448e-09	2.20504e-07	None	-0.177713	0.11076	0.366618	None	-0.877951	0.00113722	0.023813	None	0.0240943	0.915749	0.961537	None	-1.00199	7.78334e-09	2.17564e-07	Down
chr2	72945231	72968598	-	5	205,46,91,48,166	EXOC6B	hsa_circ_0002864	23367	556	2	circRNA_altered_in_2_cancer_types	Inconsistently_altered	1.1083	0.000537248	0.00731581	Up	-1.14405	0.00157854	0.00767843	Down	NA	NA	NA	NA	NA	NA	NA	NA	NA	NA	NA	NA	NA	NA	NA	NA	NA	NA	NA	NA
chr2	89100615	89104394	+	1	3779	ANKRD36BP2	hsa_circ_0121140	3779	3779	1	Cancer_specific	Exclusively_altered_in_LUAD	0.411303	0.463949	0.667314	None	NA	NA	NA	NA	1.94415	0.000532147	0.00517412	Up	1.16607	0.252108	0.548836	None	-0.25588	0.786639	0.900324	None	0.821499	0.365828	0.580447	None	0.230861	0.626585	0.76548	None
chr2	122363276	122363756	-	1	480	CLASP1	hsa_circ_0007052	480	480	1	Cancer_specific	Exclusively_altered_in_CRC	-0.673821	0.00609097	0.042297	None	0.341666	0.212253	0.341878	None	-0.108253	0.665085	0.825489	None	0.0394513	0.861525	0.944399	None	-0.546733	0.0973707	0.288867	None	0.470061	0.0977866	0.26248	None	-1.08911	8.67003e-05	0.000626792	Down
chr2	136432901	136437894	+	2	155,152	R3HDM1	hsa_circ_0001070	4993	307	1	Cancer_specific	Exclusively_altered_in_GBM	0.150077	0.532519	0.729128	None	-1.1811	0.0106177	0.0332162	Down	NA	NA	NA	NA	NA	NA	NA	NA	NA	NA	NA	NA	NA	NA	NA	NA	NA	NA	NA	NA
chr2	170401230	170413807	-	4	115,487,132,111	FASTKD1	hsa_circ_0001080	12577	845	1	Cancer_specific	Exclusively_altered_in_THCA	0.390984	0.417654	0.629188	None	-0.0413371	0.919024	0.942283	None	NA	NA	NA	NA	-1.29437	0.00213892	0.0248085	Down	NA	NA	NA	NA	NA	NA	NA	NA	-0.467695	0.340151	0.503669	None
chr2	173423435	173431661	+	5	142,72,185,96,78	PDK1	hsa_circ_0118104	8226	573	1	Cancer_specific	Exclusively_altered_in_LUAD	0.86954	0.0512156	0.17677	None	NA	NA	NA	NA	2.7238	1.73189e-09	2.18219e-07	Up	1.10496	0.188411	0.474246	None	1.17129	0.0882093	0.269384	None	NA	NA	NA	NA	0.880868	0.00596901	0.0212635	None
chr2	173435453	173460751	+	4	99,111,114,195	PDK1	hsa_circ_0006006	25298	519	1	Cancer_specific	Exclusively_altered_in_ESCC	2.0167	0.0001026	0.00222205	Up	NA	NA	NA	NA	NA	NA	NA	NA	NA	NA	NA	NA	0.702805	0.244469	0.48096	None	NA	NA	NA	NA	NA	NA	NA	NA
chr2	190593385	190609514	+	5	162,159,118,110,47	ANKAR	hsa_circ_0005644	16129	596	1	Cancer_specific	Exclusively_altered_in_LUAD	-0.156602	0.553983	0.745631	None	-0.193954	0.522954	0.652889	None	-1.33566	3.10104e-07	1.25592e-05	Down	-0.207435	0.287351	0.582172	None	-0.72044	0.116787	0.319974	None	0.137323	0.703172	0.831233	None	-0.8489	0.0135197	0.0428788	None
chr2	201721404	201721708	-	2	130,95	CLK1	hsa_circ_0004001	304	225	1	Cancer_specific	Exclusively_altered_in_GBM	0.577688	0.0564065	0.190536	None	1.09208	0.00258278	0.0112397	Up	NA	NA	NA	NA	NA	NA	NA	NA	0.524647	0.329131	0.566314	None	NA	NA	NA	NA	NA	NA	NA	NA
chr2	203419974	203421254	+	1	1280	BMPR2	hsa_circ_0005078	1280	1280	1	Cancer_specific	Exclusively_altered_in_GBM	0.314951	0.376346	0.591646	None	-1.18746	0.000857387	0.00460232	Down	-0.722975	0.0660223	0.190507	None	0.355896	0.482849	0.740263	None	0.479162	0.38122	0.608975	None	NA	NA	NA	NA	NA	NA	NA	NA
chr2	206305093	206305396	+	1	303	PARD3B	hsa_circ_0004575	303	303	2	circRNA_altered_in_2_cancer_types	Consistently_altered	-1.01514	0.00343654	0.0285233	Down	NA	NA	NA	NA	NA	NA	NA	NA	0.107608	0.81605	0.92523	None	-0.655379	0.178384	0.403632	None	1.19705	0.010704	0.0593987	None	-1.71725	7.52883e-05	0.000547511	Down
chr2	207144263	207162097	+	3	53,109,128	ZDBF2	hsa_circ_0002141	17834	290	1	Cancer_specific	Exclusively_altered_in_HCC	0.792704	0.00177255	0.0179408	None	0.279687	0.554173	0.680172	None	0.716829	0.0747925	0.205363	None	0.335095	0.132481	0.403941	None	0.497583	0.28777	0.530171	None	-1.36289	0.00667925	0.0406448	Down	NA	NA	NA	NA
chr2	210968827	211019335	-	3	198,142,1117	KANSL1L	hsa_circ_0002617	50508	1457	2	circRNA_altered_in_2_cancer_types	Consistently_altered	0.414368	0.22737	0.446647	None	NA	NA	NA	NA	0.145043	0.687544	0.835388	None	0.345446	0.334834	0.632918	None	1.57921	5.87071e-05	0.00515269	Up	0.549827	0.0502782	0.168802	None	1.24428	0.00163122	0.00762272	Up
chr2	214174782	214228869	+	5	119,138,108,118,70	SPAG16	hsa_circ_0004664	54087	553	1	Cancer_specific	Exclusively_altered_in_LUAD	-0.294826	0.316636	0.536864	None	-0.123341	0.708621	0.801586	None	1.18299	5.64966e-05	0.000790953	Up	0.0933222	0.668028	0.852002	None	0.959246	0.042852	0.178773	None	0.362457	0.393619	0.602238	None	-0.371369	0.276311	0.432594	None
chr2	215632205	215646233	-	3	173,81,950	BARD1	hsa_circ_0001098	14028	1204	2	circRNA_altered_in_2_cancer_types	Consistently_altered	0.820468	0.00180094	0.018024	None	1.14615	0.00106439	0.00550727	Up	0.543654	0.0289555	0.108012	None	0.283874	0.241058	0.539564	None	0.818981	0.0756658	0.248978	None	2.02148	3.81318e-06	0.000140825	Up	0.825103	0.000138994	0.000933463	None
chr2	223765391	223773868	+	2	107,418	ACSL3	hsa_circ_0004821	8477	525	1	Cancer_specific	Exclusively_altered_in_GBM	0.312642	0.295461	0.512426	None	-1.19141	5.05445e-05	0.000471942	Down	NA	NA	NA	NA	-0.671938	0.104843	0.357513	None	0.547141	0.396056	0.617089	None	0.500241	0.177685	0.376395	None	NA	NA	NA	NA
chr2	231222519	231226412	+	3	163,169,84	SP140L	hsa_circ_0008382	3893	416	1	Cancer_specific	Exclusively_altered_in_ESCC	1.6129	4.60282e-06	0.000178283	Up	NA	NA	NA	NA	NA	NA	NA	NA	NA	NA	NA	NA	NA	NA	NA	NA	NA	NA	NA	NA	NA	NA	NA	NA
chr2	231307651	231314970	+	6	163,169,84,63,150,84	SP100	hsa_circ_0003922	7319	713	1	Cancer_specific	Exclusively_altered_in_GBM	0.414192	0.0353894	0.138547	None	2.49649	4.96271e-07	1.42284e-05	Up	-0.516985	0.0190086	0.0832175	None	0.513671	0.0172134	0.111592	None	0.0115182	0.960293	0.975428	None	-0.0343119	0.899797	0.958051	None	0.177017	0.519689	0.683263	None
chr2	234296902	234299129	+	2	111,81	DGKD	hsa_circ_0001112	2227	192	1	Cancer_specific	Exclusively_altered_in_LUAD	0.268062	0.281139	0.501909	None	0.628751	0.057852	0.127014	None	1.092	0.00339179	0.02389	Up	0.146705	0.526641	0.767946	None	-0.151172	0.689671	0.850261	None	-0.61316	0.035313	0.129521	None	0.0620037	0.828094	0.902241	None
chr1	1747194	1770677	-	4	107,39,103,49	GNB1	hsa_circ_0008702	23483	298	1	Cancer_specific	Exclusively_altered_in_ESCC	1.58904	1.74682e-05	0.000516053	Up	NA	NA	NA	NA	NA	NA	NA	NA	NA	NA	NA	NA	NA	NA	NA	NA	NA	NA	NA	NA	NA	NA	NA	NA
chr1	8555122	8674745	-	7	100,125,49,105,97,106,126	RERE	hsa_circ_0009117	119623	708	1	Cancer_specific	Exclusively_altered_in_CRC	-0.855605	0.035487	0.138547	None	-0.642211	0.000982994	0.00512967	None	-0.788644	0.0290632	0.108058	None	-0.477386	0.111383	0.366618	None	-1.3741	0.0357116	0.162045	None	NA	NA	NA	NA	-1.5384	1.51015e-05	0.000138505	Down
chr1	8601272	8617582	-	3	105,97,106	RERE	hsa_circ_0002158	16310	308	2	circRNA_altered_in_2_cancer_types	Consistently_altered	-0.438607	0.0448333	0.160132	None	-1.01192	1.39536e-07	5.76355e-06	Down	0.516876	0.0248798	0.0981907	None	0.48051	0.015554	0.104424	None	-1.14129	0.00529933	0.0639695	None	0.00395164	0.989816	0.998423	None	-1.00805	0.000781613	0.00415845	Down
chr1	14099572	14109326	+	2	111,4414	PRDM2	hsa_circ_0110664	9754	4525	1	Cancer_specific	Exclusively_altered_in_GBM	0.460137	0.0912646	0.258237	None	-1.20181	0.00679927	0.0236712	Down	NA	NA	NA	NA	0.704747	0.0484654	0.223939	None	NA	NA	NA	NA	NA	NA	NA	NA	NA	NA	NA	NA
chr1	16528276	16529069	-	2	80,159	ARHGEF19	hsa_circ_0003567	793	239	1	Cancer_specific	Exclusively_altered_in_LUAD	0.281583	0.348092	0.567563	None	NA	NA	NA	NA	2.01279	2.99153e-06	7.06749e-05	Up	0.330571	0.245884	0.542782	None	1.54999	0.0179622	0.116286	None	NA	NA	NA	NA	0.265168	0.516798	0.681486	None
chr1	29068914	29070498	+	1	1584	YTHDF2	hsa_circ_0000039	1584	1584	1	Cancer_specific	Exclusively_altered_in_LUAD	-0.32513	0.210031	0.425185	None	NA	NA	NA	NA	1.13235	0.00144826	0.0121654	Up	0.456609	0.128173	0.399517	None	-0.1484	0.721671	0.869274	None	0.562222	0.0923908	0.252361	None	0.167884	0.523113	0.68467	None
chr1	31478699	31479949	-	2	179,109	PUM1	hsa_circ_0004949	1250	288	1	Cancer_specific	Exclusively_altered_in_ESCC	1.04897	0.00524327	0.0383992	Up	NA	NA	NA	NA	NA	NA	NA	NA	NA	NA	NA	NA	NA	NA	NA	NA	NA	NA	NA	NA	NA	NA	NA	NA
chr1	33413822	33415375	-	2	145,206	RNF19B	hsa_circ_0000048	1553	351	1	Cancer_specific	Exclusively_altered_in_GBM	0.293708	0.111114	0.285644	None	1.00715	0.000102198	0.000824311	Up	0.33121	0.225269	0.435734	None	0.259412	0.49811	0.748735	None	0.801602	0.000420664	0.0134869	None	0.270441	0.350389	0.563167	None	0.142595	0.594015	0.743327	None
chr1	45553552	45553909	-	1	357	ZSWIM5	hsa_circ_0113446	357	357	2	circRNA_altered_in_2_cancer_types	Inconsistently_altered	-1.313	0.000635559	0.00814544	Down	-0.578739	0.0283532	0.0715286	None	0.683124	0.143735	0.31773	None	1.18539	1.02204e-05	0.00039604	Up	-1.12006	0.0377218	0.163578	None	NA	NA	NA	NA	-0.301239	0.404668	0.569687	None
chr1	46521466	46546422	-	6	177,143,126,181,99,109	PIK3R3	hsa_circ_0012300	24956	835	1	Cancer_specific	Exclusively_altered_in_GBM	0.614127	0.124892	0.307845	None	1.17355	0.00106271	0.00550727	Up	NA	NA	NA	NA	-0.480924	0.119599	0.381865	None	NA	NA	NA	NA	NA	NA	NA	NA	NA	NA	NA	NA
chr1	48821341	48825442	-	2	100,185	SPATA6	hsa_circ_0008202	4101	285	2	circRNA_altered_in_2_cancer_types	Consistently_altered	-1.77144	1.12513e-07	7.3862e-06	Down	0.648024	0.0698524	0.147004	None	0.0185884	0.962104	0.986461	None	-0.231248	0.441118	0.710616	None	-0.0890412	0.825119	0.916927	None	NA	NA	NA	NA	-1.12916	0.0111096	0.0362166	Down
chr1	51032748	51061888	-	5	155,82,64,127,96	FAF1	hsa_circ_0008197	29140	524	1	Cancer_specific	Exclusively_altered_in_ESCC	1.54858	0.000603708	0.00779454	Up	-0.255617	0.399889	0.544527	None	NA	NA	NA	NA	NA	NA	NA	NA	NA	NA	NA	NA	NA	NA	NA	NA	NA	NA	NA	NA
chr1	58992932	59004982	-	6	75,129,108,174,229,516	OMA1	hsa_circ_0012721	12050	1231	1	Cancer_specific	Exclusively_altered_in_ESCC	1.13869	0.00287024	0.0252669	Up	NA	NA	NA	NA	-0.0161897	0.959165	0.984338	None	0.234819	0.314591	0.610909	None	0.686107	0.143062	0.356963	None	0.0330163	0.936625	0.972964	None	0.180969	0.591781	0.742142	None
chr1	59787207	59812070	+	3	215,112,152	FGGY	hsa_circ_0000075	24863	479	1	Cancer_specific	Exclusively_altered_in_HCC	-0.327031	0.171133	0.37054	None	0.231988	0.369996	0.512319	None	-0.530744	0.135133	0.310834	None	0.351895	0.109833	0.366618	None	-0.874027	0.0230279	0.13073	None	-1.39542	2.84712e-06	0.000108902	Down	NA	NA	NA	NA
chr1	59787207	59844509	+	4	215,112,152,89	FGGY	hsa_circ_0005354	57302	568	2	circRNA_altered_in_2_cancer_types	Consistently_altered	-0.723543	0.0261725	0.115783	None	0.881363	0.0461732	0.105855	None	NA	NA	NA	NA	0.114979	0.732713	0.88664	None	-3.0853	0.000103656	0.00695215	Down	-1.09418	0.00374889	0.0264149	Down	NA	NA	NA	NA
chr1	59805629	59812070	+	2	112,152	FGGY	hsa_circ_0000076	6441	264	1	Cancer_specific	Exclusively_altered_in_HCC	0.378339	0.23257	0.451414	None	NA	NA	NA	NA	NA	NA	NA	NA	NA	NA	NA	NA	NA	NA	NA	NA	-1.73291	4.59365e-06	0.000163993	Down	NA	NA	NA	NA
chr1	59805629	59844509	+	3	112,152,89	FGGY	hsa_circ_0006633	38880	353	1	Cancer_specific	Exclusively_altered_in_HCC	-0.597996	0.0116578	0.0672037	None	0.169885	0.369542	0.51198	None	-0.552999	0.0299905	0.110779	None	-0.360554	0.0854129	0.318155	None	-0.936454	0.00456636	0.0605285	None	-1.71917	6.66063e-08	5.48733e-06	Down	-0.0910222	0.734369	0.84666	None
chr1	78177431	78181553	-	4	109,82,170,127	USP33	hsa_circ_0005374	4122	488	1	Cancer_specific	Exclusively_altered_in_LUAD	-0.205127	0.504831	0.7045	None	0.0397251	0.887275	0.921344	None	-1.04982	0.00176498	0.0143992	Down	-0.289492	0.359511	0.651172	None	-0.0191786	0.968973	0.981577	None	-0.0856179	0.794339	0.888962	None	-0.198251	0.590354	0.742142	None
chr1	94360169	94367225	-	4	115,203,60,85	GCLM	hsa_circ_0003513	7056	463	1	Cancer_specific	Exclusively_altered_in_ESCC	1.80352	0.000110562	0.00233711	Up	NA	NA	NA	NA	0.524308	0.269477	0.486603	None	0.227115	0.448236	0.716199	None	NA	NA	NA	NA	-0.123731	0.708558	0.832688	None	NA	NA	NA	NA
chr1	97235258	97250810	+	5	173,144,165,111,196	PTBP2	hsa_circ_0013252	15552	789	1	Cancer_specific	Exclusively_altered_in_CRC	-0.415966	0.275891	0.49575	None	0.534828	0.0567119	0.125275	None	-0.622547	0.0756353	0.207175	None	0.0203432	0.947048	0.988105	None	-1.11482	0.0305934	0.148517	None	NA	NA	NA	NA	-1.81474	3.7439e-05	0.000300829	Down
chr1	104108056	104118162	+	8	160,214,147,198,231,134,123,100	AMY2B	hsa_circ_0000099	10106	1307	3	circRNA_altered_in_3_cancer_types	Consistently_altered	-1.74443	1.3645e-11	2.9729e-09	Down	-0.320827	0.165256	0.285017	None	-0.614711	0.00649287	0.038162	None	-0.184376	0.201611	0.494599	None	-2.01702	3.78502e-07	0.000117903	Down	0.00303129	0.991897	0.998423	None	-2.18518	9.45165e-16	1.65944e-13	Down
chr1	117944807	117963271	+	4	256,97,119,81	MAN1A2	hsa_circ_0000118	18464	553	1	Cancer_specific	Exclusively_altered_in_GBM	0.689157	0.00110257	0.0126433	None	-1.11035	5.78955e-06	8.76343e-05	Down	0.421689	0.11861	0.288634	None	-0.130661	0.572023	0.791095	None	0.0303743	0.896472	0.952533	None	0.118879	0.524185	0.702304	None	0.196781	0.368858	0.532699	None
chr1	117944807	117984947	+	5	256,97,119,81,95	MAN1A2	hsa_circ_0000119	40140	648	1	Cancer_specific	Exclusively_altered_in_ESCC	1.05231	9.26703e-05	0.00209772	Up	-0.658475	0.00253356	0.0111248	None	0.695386	0.00382858	0.0265877	None	-0.174928	0.270723	0.566037	None	0.584023	0.0485569	0.192261	None	0.631763	0.00255988	0.019724	None	0.0337793	0.884589	0.938826	None
chr1	117944807	118009049	+	7	256,97,119,81,95,124,94	MAN1A2	hsa_circ_0000120	64242	866	1	Cancer_specific	Exclusively_altered_in_ESCC	1.50132	0.000968614	0.011485	Up	-0.493922	0.2917	0.434579	None	NA	NA	NA	NA	NA	NA	NA	NA	NA	NA	NA	NA	NA	NA	NA	NA	NA	NA	NA	NA
chr1	118003110	118045592	+	6	124,94,116,220,173,116	MAN1A2	hsa_circ_0002059	42482	843	1	Cancer_specific	Exclusively_altered_in_GBM	-0.27513	0.379845	0.593253	None	-1.27294	1.09043e-06	2.44976e-05	Down	0.0827404	0.791861	0.893502	None	-0.00778154	0.971383	0.994655	None	-1.05115	0.00406567	0.0571334	None	0.324387	0.313235	0.530814	None	-0.87715	0.00258909	0.0109724	None
chr1	154223516	154224129	+	2	278,173	UBAP2L	hsa_circ_0004717	613	451	1	Cancer_specific	Exclusively_altered_in_GC	0.462102	0.169804	0.368512	None	0.351671	0.331292	0.47408	None	NA	NA	NA	NA	NA	NA	NA	NA	-2.82692	0.00159297	0.0294778	Down	NA	NA	NA	NA	NA	NA	NA	NA
chr1	155644800	155649303	-	3	87,199,104	YY1AP1	hsa_circ_0003608	4503	390	1	Cancer_specific	Exclusively_altered_in_GC	-0.29738	0.117096	0.295796	None	0.0401767	0.871609	0.910463	None	0.0279881	0.925218	0.972081	None	-0.164078	0.57467	0.79379	None	-1.16088	0.000273993	0.0111325	Down	0.475322	0.104389	0.273351	None	-0.752197	0.0317348	0.0817654	None
chr1	167734819	167745403	+	4	167,214,133,103	MPZL1	hsa_circ_0000153	10584	617	1	Cancer_specific	Exclusively_altered_in_ESCC	1.44148	0.000829729	0.0101846	Up	NA	NA	NA	NA	NA	NA	NA	NA	NA	NA	NA	NA	NA	NA	NA	NA	NA	NA	NA	NA	0.0818471	0.850403	0.911994	None
chr1	172520651	172526934	+	4	115,155,138,151	SUCO	hsa_circ_0000160	6283	559	2	circRNA_altered_in_2_cancer_types	Consistently_altered	-0.206923	0.392752	0.603143	None	1.02302	0.000553346	0.0032031	Up	0.133069	0.508266	0.717634	None	-0.0402826	0.855534	0.941695	None	0.418674	0.288488	0.530171	None	1.05796	0.000305267	0.00413849	Up	0.518117	0.0119294	0.0384809	None
chr1	203676136	203677232	+	2	215,243	ATP2B4	hsa_circ_0007167	1096	458	2	circRNA_altered_in_2_cancer_types	Inconsistently_altered	-0.71284	0.0158422	0.0821812	None	1.26349	3.62701e-06	5.97232e-05	Up	-0.264971	0.266143	0.485616	None	0.142091	0.663815	0.849704	None	-1.31582	0.00471439	0.0613132	None	0.276969	0.472245	0.673362	None	-2.73491	5.84917e-08	1.35634e-06	Down
chr1	211952259	211966532	-	4	127,274,96,119	LPGAT1	hsa_circ_0002274	14273	616	1	Cancer_specific	Exclusively_altered_in_GBM	0.330882	0.295099	0.512426	None	-1.25767	0.000151569	0.00112108	Down	NA	NA	NA	NA	NA	NA	NA	NA	-0.994198	0.374624	0.603077	None	NA	NA	NA	NA	NA	NA	NA	NA
chr1	213251037	213290752	+	3	121,116,94	RPS6KC1	hsa_circ_0004849	39715	331	1	Cancer_specific	Exclusively_altered_in_HCC	0.657757	0.0623128	0.200862	None	-0.134628	0.507512	0.641164	None	0.112961	0.721735	0.854329	None	-0.164124	0.549062	0.779897	None	0.158134	0.685306	0.846555	None	1.03225	0.00350507	0.0250262	Up	-0.054414	0.859863	0.917337	None
chr1	225140371	225161855	+	7	110,140,150,131,153,116,63	DNAH14	hsa_circ_0016600	21484	863	4	circRNA_altered_in_4_cancer_types	Consistently_altered	1.64282	1.8036e-06	8.27282e-05	Up	NA	NA	NA	NA	2.87111	8.64124e-12	2.44979e-09	Up	0.10904	0.628237	0.823335	None	-0.882287	0.275463	0.515871	None	2.25886	8.17675e-10	1.09466e-07	Up	2.07309	7.11964e-08	1.50863e-06	Up
chr1	225140371	225195246	+	9	110,140,150,131,153,116,63,145,132	DNAH14	hsa_circ_0016601	54875	1140	5	circRNA_altered_in_5_cancer_types	Consistently_altered	1.95535	2.70151e-06	0.000114847	Up	NA	NA	NA	NA	2.18048	1.56998e-09	2.18219e-07	Up	0.142586	0.537607	0.772867	None	2.98745	0.000143925	0.00867726	Up	2.20943	1.22803e-09	1.31522e-07	Up	1.99792	4.87476e-08	1.15213e-06	Up
chr1	231090078	231097049	-	3	71,76,95	TTC13	hsa_circ_0000195	6971	242	2	circRNA_altered_in_2_cancer_types	Consistently_altered	0.065183	0.852855	0.923883	None	0.763164	0.0146596	0.0431468	None	NA	NA	NA	NA	-0.362165	0.365637	0.653249	None	1.50556	0.00199002	0.0350882	Up	1.29362	7.57193e-05	0.0015301	Up	0.827088	0.0061199	0.021738	None
chr1	236969443	236979843	+	6	90,70,93,107,60,95	MTR	hsa_circ_0004039	10400	515	1	Cancer_specific	Exclusively_altered_in_ESCC	1.15887	8.86358e-06	0.000291495	Up	NA	NA	NA	NA	-0.417517	0.142858	0.317648	None	-0.422684	0.0197754	0.122608	None	-0.445183	0.241065	0.476269	None	0.67379	0.0500417	0.168537	None	-0.67342	0.0130077	0.0416313	None
chr1	243579003	243589860	+	3	128,109,132	SDCCAG8	hsa_circ_0017241	10857	369	1	Cancer_specific	Exclusively_altered_in_GBM	0.273028	0.219817	0.436876	None	-1.34255	0.00300844	0.012569	Down	NA	NA	NA	NA	NA	NA	NA	NA	NA	NA	NA	NA	NA	NA	NA	NA	NA	NA	NA	NA
chr8	17601112	17613470	-	2	196,2245	MTUS1	hsa_circ_0083444	12358	2441	1	Cancer_specific	Exclusively_altered_in_LUAD	-0.151421	0.611267	0.777233	None	0.49294	0.255501	0.393091	None	1.53628	6.72841e-07	2.18001e-05	Up	-0.27332	0.305057	0.604067	None	0.53339	0.38182	0.609412	None	0.722045	0.0189898	0.0836959	None	0.281603	0.187246	0.327347	None
chr8	18622958	18662408	-	5	90,59,113,81,195	PSD3	hsa_circ_0002111	39450	538	2	circRNA_altered_in_2_cancer_types	Consistently_altered	1.12297	0.000196967	0.00345305	Up	0.794765	8.94947e-06	0.000121166	None	0.597592	0.0785554	0.2121	None	2.58201	5.82951e-14	3.31311e-11	Up	1.0698	0.0285662	0.143137	None	-0.644751	0.021776	0.0911021	None	0.642746	0.113633	0.223447	None
chr8	18656804	18662408	-	4	59,113,81,195	PSD3	hsa_circ_0004458	5604	448	3	circRNA_altered_in_3_cancer_types	Inconsistently_altered	0.562447	0.131082	0.316056	None	1.18378	0.000217062	0.00150115	Up	0.803802	0.0503917	0.154444	None	2.05386	0.000383048	0.0068031	Up	0.557038	0.255768	0.49439	None	-1.3312	0.000160926	0.0024275	Down	0.331519	0.464027	0.629459	None
chr8	18725183	18730243	-	2	396,1108	PSD3	hsa_circ_0136098	5060	1504	5	circRNA_altered_in_5_cancer_types	Consistently_altered	1.55628	1.63774e-05	0.000500805	Up	1.70767	5.36078e-05	0.000491137	Up	2.28025	1.23708e-06	3.42159e-05	Up	1.79962	8.0277e-10	1.36872e-07	Up	0.367785	0.543416	0.745273	None	-0.992175	0.00139441	0.0125497	None	1.06252	0.00238263	0.0103839	Up
chr8	29959413	29962002	+	2	76,187	LEPROTL1	hsa_circ_0007353	2589	263	1	Cancer_specific	Exclusively_altered_in_GBM	0.00255159	0.994166	0.99636	None	1.48666	0.000408484	0.00255712	Up	NA	NA	NA	NA	NA	NA	NA	NA	0.358706	0.618787	0.802517	None	NA	NA	NA	NA	NA	NA	NA	NA
chr8	37727937	37735069	-	3	109,808,443	RAB11FIP1	hsa_circ_0005630	7132	1360	1	Cancer_specific	Exclusively_altered_in_HCC	-0.240088	0.427709	0.639363	None	NA	NA	NA	NA	-0.122067	0.688053	0.835388	None	0.291273	0.218078	0.515491	None	0.794404	0.0356803	0.162045	None	1.24156	0.00188123	0.0158646	Up	0.950218	0.000509524	0.00291258	None
chr8	38677039	38678153	+	1	1114	TACC1	hsa_circ_0003316	1114	1114	2	circRNA_altered_in_2_cancer_types	Consistently_altered	-0.263249	0.386425	0.598701	None	-0.823154	0.00593557	0.021086	None	-1.10823	0.00566112	0.0349797	Down	0.149704	0.682848	0.8567	None	-1.76575	0.000500761	0.0148792	Down	NA	NA	NA	NA	-0.782333	0.062067	0.139964	None
chr8	48320422	48353104	+	2	101,220	SPIDR	hsa_circ_0002003	32682	321	2	circRNA_altered_in_2_cancer_types	Consistently_altered	1.44791	3.44454e-06	0.000139624	Up	NA	NA	NA	NA	NA	NA	NA	NA	NA	NA	NA	NA	2.39528	0.000246849	0.0111325	Up	NA	NA	NA	NA	NA	NA	NA	NA
chr8	52758220	52773806	-	2	103,402	PCMTD1	hsa_circ_0136721	15586	505	1	Cancer_specific	Exclusively_altered_in_ESCC	1.04606	0.000656232	0.0082885	Up	NA	NA	NA	NA	0.447777	0.166868	0.350422	None	0.453662	0.249292	0.544926	None	1.0747	0.0246995	0.132967	None	-0.0540073	0.882933	0.947097	None	0.405863	0.363595	0.527578	None
chr8	54891584	54923052	-	7	147,155,57,146,88,106,63	TCEA1	hsa_circ_0084522	31468	762	2	circRNA_altered_in_2_cancer_types	Consistently_altered	1.40635	0.000164708	0.00312051	Up	0.480776	0.11787	0.220283	None	NA	NA	NA	NA	NA	NA	NA	NA	0.105581	0.823828	0.916927	None	1.18041	0.0042516	0.0293777	Up	NA	NA	NA	NA
chr8	61653817	61655656	+	1	1839	CHD7	hsa_circ_0084582	1839	1839	1	Cancer_specific	Exclusively_altered_in_ESCC	1.05154	0.000887861	0.0106991	Up	1.0186	0.120943	0.224476	None	NA	NA	NA	NA	NA	NA	NA	NA	0.0890623	0.890496	0.949022	None	NA	NA	NA	NA	0.677705	0.155671	0.282183	None
chr8	62593526	62596747	-	2	69,150	ASPH	hsa_circ_0084615	3221	219	4	circRNA_altered_in_4_cancer_types	Consistently_altered	0.753196	8.07275e-05	0.00187611	None	0.895693	0.0006775	0.00379399	None	1.47645	0.000533838	0.00517412	Up	-0.265657	0.334225	0.632918	None	1.28173	0.000967476	0.0215263	Up	2.18414	1.0612e-07	7.57699e-06	Up	1.25983	6.18164e-06	6.49337e-05	Up
chr8	71071739	71075089	-	2	148,144	NCOA2	hsa_circ_0001810	3350	292	1	Cancer_specific	Exclusively_altered_in_GBM	-0.215147	0.333059	0.552352	None	1.19221	9.98195e-05	0.000818927	Up	0.765953	0.0156666	0.0743343	None	0.383164	0.20634	0.500442	None	0.450942	0.174534	0.397814	None	0.503536	0.0546486	0.179703	None	0.46881	0.0429394	0.105334	None
chr8	71587052	71619388	+	4	82,550,118,221	XKR9	hsa_circ_0137079	32336	971	1	Cancer_specific	Exclusively_altered_in_LUAD	0.574339	0.32395	0.542973	None	-0.703843	0.0944224	0.186927	None	3.73047	1.86442e-07	8.13174e-06	Up	NA	NA	NA	NA	NA	NA	NA	NA	0.141011	0.783289	0.88101	None	NA	NA	NA	NA
chr8	98817580	98837381	+	5	112,74,123,99,96	LAPTM4B	hsa_circ_0003214	19801	504	1	Cancer_specific	Exclusively_altered_in_ESCC	1.07669	0.00446104	0.0347125	Up	-0.331447	0.271072	0.411044	None	NA	NA	NA	NA	NA	NA	NA	NA	NA	NA	NA	NA	NA	NA	NA	NA	NA	NA	NA	NA
chr8	99718694	99719539	-	2	168,165	STK3	hsa_circ_0004592	845	333	1	Cancer_specific	Exclusively_altered_in_GBM	0.787046	7.93623e-06	0.000271232	None	1.59143	4.61527e-08	2.88395e-06	Up	-0.331659	0.102648	0.257528	None	0.322805	0.0405911	0.199446	None	0.639145	0.0494675	0.193826	None	0.915059	0.00105066	0.00995805	None	0.216858	0.314361	0.475214	None
chr8	102570646	102571040	+	1	394	GRHL2	hsa_circ_0085173	394	394	1	Cancer_specific	Exclusively_altered_in_CRC	-0.315002	0.342263	0.561737	None	NA	NA	NA	NA	NA	NA	NA	NA	NA	NA	NA	NA	NA	NA	NA	NA	NA	NA	NA	NA	1.55618	0.000317528	0.00188522	Up
chr8	116599227	116635985	-	4	604,1130,929,158	TRPS1	hsa_circ_0085362	36758	2821	2	circRNA_altered_in_2_cancer_types	Inconsistently_altered	1.04346	0.00255205	0.0234117	Up	0.440082	0.196335	0.324954	None	NA	NA	NA	NA	-0.54871	0.0112171	0.0831527	None	-1.65142	0.00931678	0.0845295	None	NA	NA	NA	NA	-2.31937	9.13382e-08	1.87091e-06	Down
chr8	116631358	116635985	-	2	929,158	TRPS1	hsa_circ_0006950	4627	1087	1	Cancer_specific	Exclusively_altered_in_CRC	0.60512	0.137987	0.325015	None	0.629315	0.0828731	0.168582	None	NA	NA	NA	NA	-0.817396	0.00814684	0.0658311	None	-1.22518	0.159034	0.376247	None	NA	NA	NA	NA	-1.60974	0.00140865	0.00690615	Down
chr8	117668094	117671219	-	3	150,100,168	EIF3H	hsa_circ_0005231	3125	418	1	Cancer_specific	Exclusively_altered_in_ESCC	1.00553	0.00484777	0.0365787	Up	-0.352531	0.191078	0.318961	None	NA	NA	NA	NA	NA	NA	NA	NA	NA	NA	NA	NA	NA	NA	NA	NA	NA	NA	NA	NA
chr8	124349864	124351686	-	2	197,136	ATAD2	hsa_circ_0085465	1822	333	1	Cancer_specific	Exclusively_altered_in_HCC	0.883643	0.00607367	0.042297	None	NA	NA	NA	NA	NA	NA	NA	NA	NA	NA	NA	NA	1.40753	0.0291204	0.14499	None	1.34431	0.00199449	0.0164315	Up	NA	NA	NA	NA
chr8	128902834	128903244	+	1	410	PVT1	hsa_circ_0001821	410	410	1	Cancer_specific	Exclusively_altered_in_CRC	0.798293	0.00137963	0.0148381	None	0.233734	0.441645	0.583671	None	NA	NA	NA	NA	NA	NA	NA	NA	0.705221	0.0368743	0.163555	None	NA	NA	NA	NA	1.6936	1.82548e-06	2.32072e-05	Up
chr8	131164981	131193126	-	6	70,101,87,76,86,130	ASAP1	hsa_circ_0008934	28145	550	1	Cancer_specific	Exclusively_altered_in_THCA	0.318111	0.109962	0.284782	None	0.512338	0.0486612	0.110829	None	-0.308171	0.353883	0.582444	None	1.06685	0.00422707	0.0421471	Up	-0.813667	0.0688664	0.233596	None	NA	NA	NA	NA	NA	NA	NA	NA
chr8	135612678	135622898	-	4	233,1457,151,186	ZFAT	hsa_circ_0007209	10220	2027	1	Cancer_specific	Exclusively_altered_in_ESCC	1.29225	0.00738704	0.0478647	Up	NA	NA	NA	NA	NA	NA	NA	NA	0.0512788	0.885853	0.957512	None	NA	NA	NA	NA	NA	NA	NA	NA	NA	NA	NA	NA
chr8	141710989	141716304	-	3	132,138,87	PTK2	hsa_circ_0005273	5315	357	1	Cancer_specific	Exclusively_altered_in_ESCC	1.14782	0.00180964	0.018024	Up	-0.281312	0.355861	0.49927	None	NA	NA	NA	NA	NA	NA	NA	NA	NA	NA	NA	NA	NA	NA	NA	NA	NA	NA	NA	NA
chr8	141749116	141762415	-	5	90,101,116,101,85	PTK2	hsa_circ_0003171	13299	493	2	circRNA_altered_in_2_cancer_types	Consistently_altered	-0.63159	0.0603946	0.198897	None	-0.7209	0.000456751	0.00277582	None	0.160061	0.681283	0.834566	None	-0.111586	0.721729	0.884649	None	-1.96923	0.000534359	0.0151321	Down	NA	NA	NA	NA	-1.40281	0.000154419	0.00102033	Down
chr8	141828375	141900868	-	8	78,141,55,63,80,88,167,227	PTK2	hsa_circ_0005982	72493	899	1	Cancer_specific	Exclusively_altered_in_ESCC	1.23282	2.63845e-05	0.000707509	Up	-0.0887544	0.60027	0.715007	None	-0.275213	0.230724	0.441961	None	0.412317	0.0126122	0.0908539	None	0.414963	0.235264	0.468679	None	0.251877	0.35073	0.563167	None	-0.279789	0.300445	0.459263	None
chr13	28771321	28794515	+	2	162,148	PAN3	hsa_circ_0006597	23194	310	1	Cancer_specific	Exclusively_altered_in_THCA	-0.57848	0.240054	0.460523	None	NA	NA	NA	NA	-0.456231	0.229331	0.440783	None	-1.13122	0.000653021	0.010084	Down	0.302434	0.553581	0.751921	None	NA	NA	NA	NA	NA	NA	NA	NA
chr13	41133645	41134997	-	1	1352	FOXO1	hsa_circ_0030042	1352	1352	1	Cancer_specific	Exclusively_altered_in_ESCC	1.46084	0.000577493	0.00762554	Up	NA	NA	NA	NA	0.898088	0.0396727	0.131708	None	NA	NA	NA	NA	NA	NA	NA	NA	NA	NA	NA	NA	0.211263	0.596355	0.743327	None
chr13	77700452	77703365	-	2	225,75	MYCBP2	hsa_circ_0000495	2913	300	1	Cancer_specific	Exclusively_altered_in_GBM	-0.53657	0.244204	0.463669	None	-2.22937	0.000380306	0.00241355	Down	NA	NA	NA	NA	NA	NA	NA	NA	NA	NA	NA	NA	NA	NA	NA	NA	NA	NA	NA	NA
chr12	9020437	9021799	+	4	216,128,91,69	A2ML1	hsa_circ_0025388	1362	504	1	Cancer_specific	Exclusively_altered_in_ESCC	-2.93602	5.01964e-08	3.80402e-06	Down	NA	NA	NA	NA	NA	NA	NA	NA	NA	NA	NA	NA	NA	NA	NA	NA	NA	NA	NA	NA	NA	NA	NA	NA
chr12	22796696	22826594	+	5	260,141,143,84,161	ETNK1	hsa_circ_0008664	29898	789	2	circRNA_altered_in_2_cancer_types	Consistently_altered	1.54273	0.000255678	0.00428506	Up	0.218519	0.466672	0.607521	None	0.109149	0.742179	0.864985	None	-0.137155	0.675782	0.855423	None	0.540122	0.212066	0.438927	None	1.46531	0.000506928	0.00571494	Up	0.824946	0.0202696	0.058052	None
chr12	26703179	26755639	-	11	109,143,191,121,129,126,252,201,123,126,90	ITPR2	hsa_circ_0098219	52460	1611	1	Cancer_specific	Exclusively_altered_in_GBM	0.285692	0.518499	0.716688	None	1.43542	0.00247215	0.0109142	Up	NA	NA	NA	NA	NA	NA	NA	NA	NA	NA	NA	NA	-0.241471	0.516865	0.702304	None	NA	NA	NA	NA
chr12	29812812	29813818	-	2	104,82	TMTC1	hsa_circ_0025765	1006	186	1	Cancer_specific	Exclusively_altered_in_LUAD	-0.877871	0.0279194	0.121053	None	NA	NA	NA	NA	-1.98991	4.58341e-06	9.80676e-05	Down	-0.011121	0.977153	0.994655	None	-0.353908	0.59177	0.775065	None	NA	NA	NA	NA	NA	NA	NA	NA
chr12	46633461	46648719	-	3	215,115,123	SLC38A1	hsa_circ_0098634	15258	453	1	Cancer_specific	Exclusively_altered_in_LUAD	-0.212184	0.613572	0.777233	None	NA	NA	NA	NA	1.56414	0.000356884	0.00385434	Up	-0.507045	0.373058	0.656413	None	-0.731244	0.0859351	0.264983	None	1.09404	0.0609722	0.192629	None	-0.263187	0.206344	0.351451	None
chr12	56094682	56094938	-	1	256	ITGA7	hsa_circ_0026782	256	256	2	circRNA_altered_in_2_cancer_types	Consistently_altered	-3.66187	1.06997e-15	9.32482e-13	Down	NA	NA	NA	NA	NA	NA	NA	NA	NA	NA	NA	NA	-1.76426	0.0329476	0.155896	None	NA	NA	NA	NA	-5.63929	2.76207e-19	1.13153e-16	Down
chr12	70671911	70704797	+	2	143,123	CNOT2	hsa_circ_0007127	32886	266	1	Cancer_specific	Exclusively_altered_in_ESCC	1.00305	0.00593174	0.0415372	Up	0.54892	0.218578	0.348382	None	NA	NA	NA	NA	0.503922	0.170367	0.457706	None	0.963638	0.146279	0.359732	None	-0.118775	0.75596	0.863111	None	NA	NA	NA	NA
chr12	97886238	97954825	+	7	146,109,128,187,205,162,251	RMST	hsa_circ_0099634	68587	1188	2	circRNA_altered_in_2_cancer_types	Inconsistently_altered	-1.00955	0.174545	0.374373	None	0.65392	0.0614382	0.132853	None	-0.229463	0.580121	0.778529	None	0.680006	0.000277766	0.00532124	None	-0.415469	0.368001	0.600586	None	3.8254	4.78305e-11	1.02453e-08	Up	-2.69498	0.000205002	0.00130543	Down
chr11	36248634	36248980	+	1	346	LDLRAD3	hsa_circ_0006988	346	346	1	Cancer_specific	Exclusively_altered_in_GBM	-0.274785	0.232988	0.451722	None	1.8332	8.48659e-07	2.17703e-05	Up	NA	NA	NA	NA	0.694887	0.111703	0.366962	None	-1.1209	0.0409523	0.172387	None	NA	NA	NA	NA	NA	NA	NA	NA
chr11	57258696	57259335	-	3	139,36,147	SLC43A1	hsa_circ_0005204	639	322	3	circRNA_altered_in_3_cancer_types	Consistently_altered	-1.98931	2.68416e-10	3.89874e-08	Down	0.358326	0.263552	0.402177	None	-1.02192	5.2797e-05	0.000757871	Down	-0.84129	0.0147556	0.101037	None	-0.825309	0.0168468	0.113849	None	-0.735996	0.00166372	0.0147691	None	-2.02749	2.74756e-12	2.11047e-10	Down
chr11	92085261	92088570	+	1	3309	FAT3	hsa_circ_0000348	3309	3309	2	circRNA_altered_in_2_cancer_types	Consistently_altered	0.218647	0.606414	0.773933	None	-0.792973	0.00426217	0.0163574	None	-2.29768	8.85241e-07	2.64175e-05	Down	NA	NA	NA	NA	-2.42888	0.00531187	0.0639695	None	NA	NA	NA	NA	-2.27286	3.97098e-05	0.000316905	Down
chr11	94532555	94533477	+	1	922	AMOTL1	hsa_circ_0004214	922	922	1	Cancer_specific	Exclusively_altered_in_CRC	-0.462914	0.229838	0.448432	None	NA	NA	NA	NA	NA	NA	NA	NA	NA	NA	NA	NA	-1.11994	0.0498985	0.194698	None	NA	NA	NA	NA	-2.52906	2.77875e-05	0.000237158	Down
chr11	120343758	120348235	+	6	78,76,168,88,87,80	ARHGEF12	hsa_circ_0009021	4477	577	1	Cancer_specific	Exclusively_altered_in_HCC	-0.570369	0.0611606	0.198897	None	0.23847	0.410937	0.555844	None	-0.160657	0.694898	0.837943	None	NA	NA	NA	NA	NA	NA	NA	NA	-1.0394	0.00845316	0.0486738	Down	NA	NA	NA	NA
chr10	22171210	22209892	-	5	158,91,94,98,166	DNAJC1	hsa_circ_0002618	38682	607	1	Cancer_specific	Exclusively_altered_in_GBM	-0.586599	0.0956922	0.26644	None	-1.30714	0.000784245	0.00427563	Down	NA	NA	NA	NA	NA	NA	NA	NA	NA	NA	NA	NA	NA	NA	NA	NA	NA	NA	NA	NA
chr10	29801663	29820217	-	7	127,226,577,244,140,62,35	SVIL	hsa_circ_0018064	18554	1411	3	circRNA_altered_in_3_cancer_types	Consistently_altered	-2.85354	1.00876e-10	1.59842e-08	Down	NA	NA	NA	NA	NA	NA	NA	NA	NA	NA	NA	NA	-2.2931	0.000376919	0.0128084	Down	NA	NA	NA	NA	-5.11906	2.1135e-14	2.8861e-12	Down
chr10	31661946	31750166	+	4	156,162,143,201	ZEB1	hsa_circ_0000230	88220	662	2	circRNA_altered_in_2_cancer_types	Consistently_altered	0.162482	0.590655	0.768293	None	0.866647	0.0244841	0.0644972	None	-0.166839	0.563732	0.761945	None	0.0819165	0.790806	0.916626	None	-1.14831	0.00251643	0.0416212	Down	0.330805	0.392923	0.602033	None	-2.28057	1.92425e-08	4.82634e-07	Down
chr10	69726439	69773943	-	8	120,173,190,112,60,125,77,161	HERC4	hsa_circ_0093906	47504	1018	1	Cancer_specific	Exclusively_altered_in_GBM	-0.312891	0.37299	0.588879	None	-1.04835	0.000313568	0.00206531	Down	-0.636923	0.131437	0.304184	None	-0.203244	0.530578	0.768805	None	-0.590169	0.260418	0.498167	None	NA	NA	NA	NA	-0.108373	0.746121	0.853801	None
chr10	69785302	69804320	-	5	131,92,222,77,160	HERC4	hsa_circ_0007113	19018	682	1	Cancer_specific	Exclusively_altered_in_HCC	0.0885954	0.804734	0.902043	None	0.0296317	0.93176	0.952075	None	NA	NA	NA	NA	NA	NA	NA	NA	0.0899473	0.868377	0.937226	None	1.0022	0.00841152	0.0486738	Up	0.0532241	0.891057	0.94406	None
chr10	75576780	75583842	-	4	95,76,49,45	CAMK2G	hsa_circ_0094177	7062	265	1	Cancer_specific	Exclusively_altered_in_ESCC	-3.35253	3.2406e-10	4.3449e-08	Down	NA	NA	NA	NA	NA	NA	NA	NA	NA	NA	NA	NA	-1.10532	0.177675	0.403003	None	NA	NA	NA	NA	NA	NA	NA	NA
chr10	95790439	95792009	+	1	1570	PLCE1	hsa_circ_0019223	1570	1570	2	circRNA_altered_in_2_cancer_types	Consistently_altered	2.30069	2.01017e-06	8.98392e-05	Up	1.90104	2.0056e-06	3.81847e-05	Up	-0.565777	0.076704	0.208886	None	0.87226	0.0133085	0.0945459	None	0.40221	0.389809	0.614949	None	NA	NA	NA	NA	-0.231455	0.451416	0.61575	None
chr10	97098889	97106209	-	4	195,126,115,47	SORBS1	hsa_circ_0094606	7320	483	1	Cancer_specific	Exclusively_altered_in_ESCC	-1.83958	0.000208259	0.00359401	Down	NA	NA	NA	NA	NA	NA	NA	NA	NA	NA	NA	NA	-1.71911	0.0360312	0.162045	None	NA	NA	NA	NA	NA	NA	NA	NA
chr10	97141441	97170534	-	7	115,130,48,64,173,30,145	SORBS1	hsa_circ_0094617	29093	705	6	circRNA_altered_in_6_cancer_types	Inconsistently_altered	-1.49935	2.20129e-05	0.000609024	Down	2.07125	4.6142e-09	5.35467e-07	Up	-1.96008	6.15581e-07	2.14701e-05	Down	NA	NA	NA	NA	-1.9866	0.000115185	0.00742348	Down	-1.23837	0.00010081	0.00176995	Down	-2.9759	6.88773e-12	4.70279e-10	Down
chr10	116879948	116889297	+	5	84,114,129,102,209	ATRNL1	hsa_circ_0020093	9349	638	1	Cancer_specific	Exclusively_altered_in_CRC	1.42818	0.0120806	0.0690375	None	-0.232311	0.348299	0.492061	None	NA	NA	NA	NA	NA	NA	NA	NA	0.0985377	0.871154	0.937896	None	NA	NA	NA	NA	-3.09678	3.61452e-06	4.1908e-05	Down
chr10	125798030	125806240	-	4	157,147,340,1058	CHST15	hsa_circ_0000264	8210	1702	2	circRNA_altered_in_2_cancer_types	Consistently_altered	1.18788	7.48396e-05	0.00178692	Up	0.0526902	0.865623	0.905764	None	2.3407	2.82374e-09	2.91102e-07	Up	0.820451	0.00338711	0.034955	None	0.0909868	0.799375	0.907123	None	1.20946	0.0197736	0.0857391	None	0.926158	0.0137824	0.0435437	None
chr17	12608444	12626325	+	4	66,56,76,162	MYOCD	hsa_circ_0042103	17881	360	3	circRNA_altered_in_3_cancer_types	Consistently_altered	-1.56832	0.000419393	0.00619493	Down	NA	NA	NA	NA	NA	NA	NA	NA	NA	NA	NA	NA	-2.35787	0.000126685	0.00789246	Down	NA	NA	NA	NA	-2.56969	2.94025e-07	5.08953e-06	Down
chr16	4382215	4383520	+	2	238,173	GLIS2	hsa_circ_0005692	1305	411	1	Cancer_specific	Exclusively_altered_in_GBM	0.631733	0.0326983	0.132542	None	1.14699	0.000370446	0.00236949	Up	-0.327082	0.15131	0.328076	None	0.453895	0.0489842	0.225116	None	-0.37745	0.20827	0.436036	None	-0.86911	0.0143756	0.0721488	None	-0.42826	0.226652	0.372399	None
chr16	66971939	66973261	+	2	205,142	CES2	hsa_circ_0008716	1322	347	1	Cancer_specific	Exclusively_altered_in_ESCC	-1.60438	2.88491e-07	1.73393e-05	Down	NA	NA	NA	NA	NA	NA	NA	NA	NA	NA	NA	NA	-0.256978	0.708252	0.859687	None	-0.611911	0.0878248	0.24573	None	NA	NA	NA	NA
chr16	80718434	80719026	-	1	592	CDYL2	hsa_circ_0004087	592	592	1	Cancer_specific	Exclusively_altered_in_GBM	0.244527	0.364601	0.582493	None	-1.14804	0.00310525	0.0128262	Down	NA	NA	NA	NA	NA	NA	NA	NA	-0.113063	0.902468	0.957272	None	NA	NA	NA	NA	NA	NA	NA	NA
chr16	83940591	83945972	+	3	113,157,150	MLYCD	hsa_circ_0106062	5381	420	1	Cancer_specific	Exclusively_altered_in_HCC	-0.232911	0.507917	0.707107	None	NA	NA	NA	NA	-0.0519659	0.89579	0.953827	None	NA	NA	NA	NA	NA	NA	NA	NA	-1.18753	0.000661969	0.00718416	Down	NA	NA	NA	NA
chr16	88061088	88071617	+	4	168,137,63,39	BANP	hsa_circ_0040823	10529	407	1	Cancer_specific	Exclusively_altered_in_GBM	0.400742	0.191564	0.399396	None	1.69502	9.77845e-05	0.00080507	Up	0.739749	0.00983505	0.0533634	None	-0.211985	0.591464	0.806757	None	0.636167	0.0591759	0.217288	None	-0.862879	0.000344693	0.00450202	None	0.977967	0.00411888	0.0159688	None
chr15	43120125	43132631	-	3	105,141,74	TTBK2	hsa_circ_0008319	12506	320	1	Cancer_specific	Exclusively_altered_in_CRC	-0.378941	0.0905326	0.25742	None	-0.451949	0.0440999	0.101965	None	-0.301675	0.245233	0.459365	None	-0.129048	0.560252	0.784849	None	-0.232223	0.473574	0.687552	None	0.0938786	0.704479	0.831861	None	-1.2593	3.40929e-06	4.06798e-05	Down
chr15	63845913	63855207	+	5	84,82,83,114,114	USP3	hsa_circ_0008153	9294	477	1	Cancer_specific	Exclusively_altered_in_GBM	0.425237	0.293604	0.512426	None	1.58365	5.1503e-05	0.000477235	Up	0.741215	0.0124976	0.0626757	None	-0.145028	0.690634	0.86163	None	0.770703	0.0580111	0.214859	None	-0.024757	0.951419	0.980722	None	0.0711256	0.851227	0.912082	None
chr14	31596990	31638674	-	18	222,837,177,167,324,140,135,106,95,147,135,77,264,223,171,139,175,115	HECTD1	hsa_circ_0101598	41684	3649	1	Cancer_specific	Exclusively_altered_in_ESCC	-2.30758	7.72295e-05	0.00181907	Down	0.610166	0.270624	0.41091	None	NA	NA	NA	NA	NA	NA	NA	NA	NA	NA	NA	NA	NA	NA	NA	NA	NA	NA	NA	NA
chr14	33684387	33684793	+	2	245,51	NPAS3	hsa_circ_0101677	406	296	2	circRNA_altered_in_2_cancer_types	Consistently_altered	-0.787539	0.0797375	0.238392	None	0.627741	1.07975e-05	0.000143008	None	NA	NA	NA	NA	0.717383	0.0152547	0.103506	None	-2.2157	0.000294175	0.0114544	Down	NA	NA	NA	NA	-2.75279	1.50847e-06	1.97224e-05	Down
chr14	80163972	80271533	+	2	308,79	NRXN3	hsa_circ_0032812	107561	387	1	Cancer_specific	Exclusively_altered_in_CRC	-1.14844	0.0152547	0.0805726	None	NA	NA	NA	NA	NA	NA	NA	NA	NA	NA	NA	NA	-1.59996	0.0127496	0.0980617	None	NA	NA	NA	NA	-3.72562	4.40277e-11	2.46719e-09	Down
chr19	11289020	11289396	-	2	103,168	KANK2	hsa_circ_0008554	376	271	1	Cancer_specific	Exclusively_altered_in_GC	-0.36485	0.289058	0.508403	None	NA	NA	NA	NA	NA	NA	NA	NA	NA	NA	NA	NA	-3.51822	5.33805e-05	0.00515269	Down	NA	NA	NA	NA	NA	NA	NA	NA
chr19	13135834	13136366	+	1	532	NFIX	hsa_circ_0005660	532	532	3	circRNA_altered_in_3_cancer_types	Inconsistently_altered	-1.41787	0.000284164	0.00460277	Down	1.13755	0.00318238	0.0130344	Up	-0.406502	0.148632	0.324344	None	-0.632606	0.0139579	0.09834	None	-0.932486	0.0416027	0.17395	None	-0.138827	0.660143	0.795293	None	-1.22388	0.000133075	0.000903584	Down
chr19	47919908	47920607	-	3	51,160,173	MEIS3	hsa_circ_0003449	699	384	1	Cancer_specific	Exclusively_altered_in_GBM	-0.712629	0.0262556	0.115857	None	-1.52725	0.000112767	0.000877995	Down	NA	NA	NA	NA	NA	NA	NA	NA	NA	NA	NA	NA	NA	NA	NA	NA	NA	NA	NA	NA
chr19	48229068	48229481	+	1	413	EHD2	hsa_circ_0003146	413	413	1	Cancer_specific	Exclusively_altered_in_CRC	0.0963096	0.819928	0.910451	None	NA	NA	NA	NA	-0.491695	0.233682	0.44612	None	NA	NA	NA	NA	-0.729545	0.139898	0.352385	None	NA	NA	NA	NA	-2.53671	1.80278e-07	3.46191e-06	Down
chr18	8113483	8143777	+	3	274,37,133	PTPRM	hsa_circ_0002872	30294	444	3	circRNA_altered_in_3_cancer_types	Consistently_altered	-0.449317	0.351273	0.569669	None	-1.06614	0.000265763	0.0017793	Down	-1.40462	1.04689e-07	5.16162e-06	Down	0.53154	0.0235498	0.137039	None	-1.33544	0.0300284	0.146919	None	NA	NA	NA	NA	-2.637	6.5228e-10	2.58597e-08	Down
chr18	8718421	8720494	+	2	225,159	SOGA2	hsa_circ_0000825	2073	384	3	circRNA_altered_in_3_cancer_types	Consistently_altered	-0.151875	0.582067	0.763635	None	-1.37452	2.16235e-05	0.000240011	Down	NA	NA	NA	NA	NA	NA	NA	NA	-1.71988	0.000511106	0.0149259	Down	NA	NA	NA	NA	-2.39715	2.75357e-05	0.000236653	Down
chr18	18571136	18600200	-	7	151,107,247,92,136,49,89	ROCK1	hsa_circ_0108003	29064	871	2	circRNA_altered_in_2_cancer_types	Consistently_altered	-3.04009	2.98722e-07	1.73557e-05	Down	-1.28527	0.0098195	0.0312404	Down	NA	NA	NA	NA	NA	NA	NA	NA	NA	NA	NA	NA	NA	NA	NA	NA	NA	NA	NA	NA
chr18	42529845	42533305	+	1	3460	SETBP1	hsa_circ_0108457	3460	3460	2	circRNA_altered_in_2_cancer_types	Consistently_altered	-0.847994	0.0168748	0.0850762	None	0.411751	0.316194	0.459973	None	-0.432	0.283971	0.500814	None	-0.703442	0.0236438	0.137118	None	-1.34759	0.00214817	0.0371752	Down	0.283003	0.483183	0.680906	None	-1.93456	4.9378e-06	5.41835e-05	Down
chr6	57058639	57075243	-	5	93,83,157,86,220	RAB23	hsa_circ_0004119	16604	639	2	circRNA_altered_in_2_cancer_types	Consistently_altered	-0.343103	0.245645	0.465859	None	-0.214018	0.5711	0.693458	None	-0.584568	0.0975757	0.246438	None	-0.568747	0.0737139	0.291606	None	-1.53507	0.00286778	0.0432249	Down	NA	NA	NA	NA	-2.30503	7.1508e-07	1.05884e-05	Down
chr6	107824860	107827631	+	2	139,186	SOBP	hsa_circ_0001633	2771	325	1	Cancer_specific	Exclusively_altered_in_CRC	-0.106197	0.737675	0.864326	None	-0.320099	0.209392	0.339265	None	NA	NA	NA	NA	-0.113292	0.742933	0.889348	None	-0.971067	0.0561035	0.210557	None	1.31761	0.0141723	0.0721488	None	-2.31153	6.09859e-06	6.49337e-05	Down
chr6	125366356	125379252	+	2	234,165	RNF217	hsa_circ_0008536	12896	399	1	Cancer_specific	Exclusively_altered_in_CRC	0.382781	0.3392	0.558287	None	NA	NA	NA	NA	-0.597069	0.0919869	0.237615	None	-0.200482	0.530749	0.768805	None	-1.59179	0.0105312	0.0886741	None	NA	NA	NA	NA	-1.42517	0.00404967	0.0157501	Down
chr6	131247744	131277639	-	3	105,213,506	EPB41L2	hsa_circ_0077837	29895	824	5	circRNA_altered_in_5_cancer_types	Consistently_altered	-2.02922	4.64144e-10	5.68055e-08	Down	-0.8579	2.10878e-05	0.000236825	None	-1.8194	4.18903e-10	6.78623e-08	Down	-0.321556	0.258831	0.555801	None	-1.46196	6.34541e-05	0.00515634	Down	-1.761	1.84805e-08	1.79933e-06	Down	-1.8664	5.62552e-11	2.76551e-09	Down
chr6	131276244	131277639	-	2	213,506	EPB41L2	hsa_circ_0001640	1395	719	4	circRNA_altered_in_4_cancer_types	Consistently_altered	-1.74432	5.14789e-06	0.00019506	Down	-1.0559	5.60608e-05	0.000507284	Down	-1.27864	0.000122099	0.00153845	Down	-0.557011	0.0708334	0.285511	None	-0.836314	0.0447228	0.182504	None	NA	NA	NA	NA	-1.1026	0.00897298	0.0300485	Down
chr6	131466424	131490413	+	4	132,140,137,161	AKAP7	hsa_circ_0130687	23989	570	1	Cancer_specific	Exclusively_altered_in_GBM	-0.60482	0.0696266	0.216713	None	-1.02012	8.58515e-06	0.000118506	Down	-1.01705	0.0105264	0.056042	None	0.0310743	0.930362	0.982209	None	-0.976971	0.101959	0.295535	None	0.385596	0.339605	0.554101	None	NA	NA	NA	NA
chr6	145103057	145124283	+	5	202,86,158,167,112	UTRN	hsa_circ_0001648	21226	725	1	Cancer_specific	Exclusively_altered_in_GBM	-0.964429	0.0164576	0.0841219	None	1.40092	0.000102827	0.000824311	Up	-0.510884	0.0223275	0.0927452	None	0.045912	0.817241	0.92523	None	-0.135703	0.773091	0.896847	None	0.25141	0.37064	0.584618	None	0.161491	0.554016	0.710736	None
chr6	151669845	151674887	+	1	5042	AKAP12	hsa_circ_0078299	5042	5042	2	circRNA_altered_in_2_cancer_types	Consistently_altered	-1.91623	5.43368e-06	0.000201509	Down	NA	NA	NA	NA	NA	NA	NA	NA	NA	NA	NA	NA	-3.03274	0.000190585	0.00974543	Down	NA	NA	NA	NA	NA	NA	NA	NA
chr6	152650864	152653025	-	1	2161	SYNE1	hsa_circ_0078328	2161	2161	2	circRNA_altered_in_2_cancer_types	Consistently_altered	-0.642373	0.129671	0.313913	None	-0.706312	0.0428114	0.0991742	None	0.704934	0.0434166	0.13908	None	-1.01611	0.00318288	0.0339176	Down	-1.72292	0.00946962	0.08509	None	NA	NA	NA	NA	-2.44968	6.14879e-06	6.49337e-05	Down
chr6	160819010	160831878	+	4	104,155,169,118	SLC22A3	hsa_circ_0078607	12868	546	1	Cancer_specific	Exclusively_altered_in_LUAD	-0.205972	0.63021	0.789688	None	NA	NA	NA	NA	2.55182	1.62895e-08	1.15452e-06	Up	NA	NA	NA	NA	-0.766059	0.174747	0.397814	None	0.315561	0.446591	0.648672	None	0.748308	0.0312076	0.0807475	None
chrX	84558411	84563222	-	6	83,129,120,153,114,93	POF1B	hsa_circ_0091187	4811	692	2	circRNA_altered_in_2_cancer_types	Inconsistently_altered	-1.26757	0.00302855	0.0261325	Down	NA	NA	NA	NA	NA	NA	NA	NA	NA	NA	NA	NA	1.20219	0.0894012	0.270882	None	1.10898	0.360904	0.576353	None	1.14541	0.010517	0.0344677	Up
chrX	147743428	147744289	+	1	861	AFF2	hsa_circ_0001947	861	861	3	circRNA_altered_in_3_cancer_types	Consistently_altered	1.9299	3.39717e-06	0.000139624	Up	-0.861908	0.00760127	0.0257465	None	-0.866572	0.00187985	0.0149073	None	1.77385	0.00192881	0.0229974	Up	1.22197	0.0146238	0.10432	None	0.333388	0.600443	0.760321	None	1.32191	0.00348883	0.0139213	Up
chr9	16727794	16738483	-	2	201,126	BNC2	hsa_circ_0008732	10689	327	2	circRNA_altered_in_2_cancer_types	Consistently_altered	-0.382431	0.136415	0.322691	None	NA	NA	NA	NA	-0.809449	0.038698	0.131358	None	NA	NA	NA	NA	-1.81005	0.000921494	0.0207503	Down	NA	NA	NA	NA	-1.9301	4.19708e-07	6.78713e-06	Down
chr9	35546426	35548532	+	1	2106	RUSC2	hsa_circ_0002702	2106	2106	2	circRNA_altered_in_2_cancer_types	Consistently_altered	-0.0797918	0.846718	0.921028	None	-0.799512	0.00489268	0.0182595	None	0.0794558	0.785616	0.889111	None	-0.476499	0.046609	0.220745	None	-1.4031	0.000702849	0.0182448	Down	-0.316701	0.310844	0.527597	None	-1.48959	1.44397e-05	0.000135469	Down
chr9	109734285	109746690	+	3	268,137,224	ZNF462	hsa_circ_0009029	12405	629	1	Cancer_specific	Exclusively_altered_in_GBM	-0.378665	0.326476	0.544707	None	1.8751	1.11362e-08	9.69244e-07	Up	NA	NA	NA	NA	-0.224795	0.385465	0.663856	None	-1.46067	0.0237603	0.13089	None	NA	NA	NA	NA	NA	NA	NA	NA
chr9	114332370	114348445	-	5	119,109,156,118,168	PTGR1	hsa_circ_0008043	16075	670	1	Cancer_specific	Exclusively_altered_in_HCC	-0.552996	0.141325	0.329318	None	NA	NA	NA	NA	NA	NA	NA	NA	0.16086	0.653762	0.842527	None	-0.475347	0.432076	0.644965	None	-1.03795	0.00242523	0.0192402	Down	-0.689398	0.0418807	0.103356	None
chr22	46096161	46136418	+	6	97,159,81,166,109,170	ATXN10	hsa_circ_0001246	40257	782	3	circRNA_altered_in_3_cancer_types	Consistently_altered	-0.0790782	0.787545	0.891937	None	-0.332308	0.107213	0.204443	None	-1.02808	1.83697e-05	0.000315624	Down	-0.339624	0.187911	0.473947	None	-1.9554	0.000673092	0.0181345	Down	-0.215261	0.486766	0.6835	None	-1.4176	1.18567e-05	0.000115649	Down
chr7	716865	751164	-	3	92,171,199	PRKAR1B	hsa_circ_0008039	34299	462	2	circRNA_altered_in_2_cancer_types	Inconsistently_altered	0.969166	0.0148231	0.0794973	None	-1.37095	0.000174302	0.00125302	Down	NA	NA	NA	NA	NA	NA	NA	NA	1.26396	0.0684689	0.233519	None	-0.924306	0.0290101	0.111846	None	2.78655	9.80541e-14	1.08216e-11	Up
chr7	3658711	3681737	+	3	160,107,148	SDK1	hsa_circ_0134225	23026	415	3	circRNA_altered_in_3_cancer_types	Consistently_altered	1.905	1.71947e-06	8.1001e-05	Up	NA	NA	NA	NA	1.62851	0.000140492	0.00173172	Up	2.41883	1.51984e-09	2.35576e-07	Up	0.939104	0.113952	0.315988	None	NA	NA	NA	NA	NA	NA	NA	NA
chr7	5680784	5692141	-	2	223,98	RNF216	hsa_circ_0079284	11357	321	4	circRNA_altered_in_4_cancer_types	Inconsistently_altered	-1.37497	0.000465629	0.00665238	Down	1.14405	0.00512336	0.0188452	Up	NA	NA	NA	NA	NA	NA	NA	NA	-2.3478	3.99233e-05	0.00515269	Down	NA	NA	NA	NA	-3.81822	7.26375e-13	6.37653e-11	Down
chr7	11101417	11151094	+	3	51,122,118	PHF14	hsa_circ_0079440	49677	291	1	Cancer_specific	Exclusively_altered_in_ESCC	1.14751	0.00298668	0.0260383	Up	NA	NA	NA	NA	NA	NA	NA	NA	NA	NA	NA	NA	NA	NA	NA	NA	NA	NA	NA	NA	NA	NA	NA	NA
chr7	16255690	16317851	-	4	132,93,93,98	ISPD	hsa_circ_0133855	62161	416	1	Cancer_specific	Exclusively_altered_in_HCC	0.707433	0.172787	0.37282	None	-0.553571	0.0536741	0.119894	None	NA	NA	NA	NA	NA	NA	NA	NA	-1.43551	0.00530473	0.0639695	None	-1.02315	0.00829537	0.0482845	Down	NA	NA	NA	NA
chr7	65705311	65706257	+	1	946	TPST1	hsa_circ_0007672	946	946	2	circRNA_altered_in_2_cancer_types	Consistently_altered	0.568162	0.0420868	0.153147	None	0.360982	0.294434	0.436495	None	1.01361	0.00757394	0.0429443	Up	-0.223144	0.41891	0.691996	None	0.524115	0.256669	0.49439	None	1.17544	0.000351835	0.00453994	Up	0.325461	0.347132	0.512533	None
chr7	65705311	65751696	+	2	946,199	TPST1	hsa_circ_0006041	46385	1145	1	Cancer_specific	Exclusively_altered_in_GBM	0.536691	0.0742353	0.227803	None	1.00707	3.50995e-05	0.000356406	Up	0.642733	0.0422261	0.136813	None	-0.143601	0.611539	0.816802	None	-0.473603	0.284483	0.525394	None	0.313197	0.468524	0.670842	None	-0.521883	0.157295	0.284288	None
chr7	156549086	156619438	-	6	73,65,69,127,104,140	LMBR1	hsa_circ_0003511	70352	578	1	Cancer_specific	Exclusively_altered_in_CRC	0.612275	0.125222	0.307845	None	-0.273269	0.264789	0.40356	None	-0.318174	0.333615	0.557994	None	-0.457542	0.166138	0.451002	None	1.12997	0.00602038	0.0670605	None	-0.514866	0.164343	0.358844	None	1.75828	2.38507e-07	4.24819e-06	Up
chr7	158528193	158531812	-	3	106,132,99	ESYT2	hsa_circ_0083196	3619	337	1	Cancer_specific	Exclusively_altered_in_ESCC	-1.6733	0.000427146	0.00625644	Down	NA	NA	NA	NA	NA	NA	NA	NA	NA	NA	NA	NA	NA	NA	NA	NA	NA	NA	NA	NA	NA	NA	NA	NA
chr5	38523520	38530768	-	4	164,140,115,161	LIFR	hsa_circ_0072309	7248	580	6	circRNA_altered_in_6_cancer_types	Consistently_altered	-1.28457	3.41103e-05	0.000887377	Down	0.482945	0.0230329	0.0615474	None	-1.39486	7.26168e-07	2.28743e-05	Down	-1.35513	1.2116e-05	0.000424313	Down	-1.34857	0.000778041	0.0193888	Down	-2.91623	9.20616e-22	9.85979e-19	Down	-2.45407	1.47778e-22	9.08097e-20	Down
chr5	38991050	39003724	-	4	127,64,132,65	RICTOR	hsa_circ_0006157	12674	388	1	Cancer_specific	Exclusively_altered_in_HCC	0.636021	0.0560185	0.189962	None	0.290668	0.173504	0.294966	None	-0.425485	0.145116	0.318883	None	-0.368485	0.175954	0.46802	None	-0.187214	0.709154	0.859687	None	1.14462	0.000379052	0.00472052	Up	0.0288249	0.949913	0.972059	None
chr5	113740134	113740553	+	1	419	KCNN2	hsa_circ_0127664	419	419	4	circRNA_altered_in_4_cancer_types	Consistently_altered	-2.03931	0.00482045	0.0365787	Down	-0.472902	0.124527	0.22869	None	NA	NA	NA	NA	NA	NA	NA	NA	-2.60958	6.06524e-05	0.00515269	Down	-4.77068	1.35778e-18	7.27089e-16	Down	-3.45323	1.67177e-09	6.04295e-08	Down
chr5	131013395	131044965	-	6	170,147,86,202,136,72	FNIP1	hsa_circ_0001524	31570	813	2	circRNA_altered_in_2_cancer_types	Consistently_altered	-1.24327	0.000118458	0.00242908	Down	0.828244	0.00682356	0.0237219	None	-0.894238	7.53982e-05	0.00101788	None	-0.0997418	0.796308	0.919232	None	-0.983419	0.0270477	0.137447	None	NA	NA	NA	NA	-1.61225	1.78114e-07	3.46191e-06	Down
chr5	153409048	153414527	-	4	92,93,100,224	FAM114A2	hsa_circ_0007773	5479	509	1	Cancer_specific	Exclusively_altered_in_GBM	-0.48797	0.0990856	0.271124	None	1.3121	3.55957e-05	0.000356982	Up	0.130967	0.568378	0.765633	None	-0.360533	0.112009	0.367259	None	-0.251575	0.530785	0.733755	None	-0.507622	0.0777212	0.226095	None	0.0191914	0.936916	0.967088	None
chr4	91229394	91234198	+	2	1365,185	CCSER1	hsa_circ_0127310	4804	1550	6	circRNA_altered_in_6_cancer_types	Inconsistently_altered	1.65406	0.000302879	0.00484329	Up	-1.95084	1.43952e-05	0.000178986	Down	2.18953	9.39008e-09	7.0989e-07	Up	-1.34844	7.36728e-05	0.00187481	Down	1.64914	0.00246912	0.0414254	Up	NA	NA	NA	NA	1.31137	4.19873e-05	0.000332919	Up
chr4	120517677	120528452	-	2	90,589	PDE5A	hsa_circ_0002474	10775	679	1	Cancer_specific	Exclusively_altered_in_ESCC	-1.42593	0.000507453	0.00707592	Down	NA	NA	NA	NA	NA	NA	NA	NA	NA	NA	NA	NA	NA	NA	NA	NA	NA	NA	NA	NA	NA	NA	NA	NA
chr4	121675707	121732604	-	7	86,94,161,94,158,85,80	PRDM5	hsa_circ_0005654	56897	758	1	Cancer_specific	Exclusively_altered_in_LUAD	-0.380371	0.202366	0.415947	None	0.855204	0.00182217	0.00858923	None	-1.12969	1.85003e-06	4.66207e-05	Down	-0.489034	0.0289791	0.158574	None	-1.26601	0.00524136	0.0639695	None	NA	NA	NA	NA	-0.774535	0.00457022	0.0172294	None
chr4	148778703	148803083	+	6	102,111,105,130,107,95	ARHGAP10	hsa_circ_0071106	24380	650	3	circRNA_altered_in_3_cancer_types	Consistently_altered	-1.60017	4.8886e-10	5.68055e-08	Down	-0.445841	0.238122	0.371513	None	-0.645557	0.0126015	0.0626757	None	0.399365	0.0458384	0.218667	None	-1.43867	5.78704e-05	0.00515269	Down	0.0225303	0.963828	0.987886	None	-2.8474	1.05663e-13	1.08216e-11	Down
chr4	148785996	148803083	+	5	111,105,130,107,95	ARHGAP10	hsa_circ_0008243	17087	548	2	circRNA_altered_in_2_cancer_types	Consistently_altered	-1.84762	0.000350526	0.00533028	Down	-0.675634	0.236395	0.370004	None	NA	NA	NA	NA	NA	NA	NA	NA	-0.526135	0.399337	0.619386	None	NA	NA	NA	NA	-2.34977	0.000141493	0.000945084	Down
chr4	148827788	148876525	+	6	82,46,66,75,88,59	ARHGAP10	hsa_circ_0002177	48737	416	3	circRNA_altered_in_3_cancer_types	Consistently_altered	-2.23536	0.000651694	0.0082885	Down	-1.07903	0.0458373	0.105283	None	NA	NA	NA	NA	NA	NA	NA	NA	-2.64944	0.000483116	0.0148023	Down	NA	NA	NA	NA	-3.29667	5.21594e-09	1.55888e-07	Down
chr4	148860975	148887990	+	5	75,88,59,106,160	ARHGAP10	hsa_circ_0007265	27015	488	2	circRNA_altered_in_2_cancer_types	Consistently_altered	-1.77903	6.15578e-07	3.25137e-05	Down	-0.37334	0.388309	0.532832	None	-0.901055	0.0303664	0.111804	None	-0.356473	0.323542	0.621455	None	-1.52436	0.00863365	0.0811165	None	NA	NA	NA	NA	-2.95899	5.57927e-10	2.28564e-08	Down
chr4	151336589	151412187	-	7	153,120,141,113,116,103,118	LRBA	hsa_circ_0125513	75598	864	2	circRNA_altered_in_2_cancer_types	Consistently_altered	-2.9332	1.10539e-06	5.50486e-05	Down	NA	NA	NA	NA	NA	NA	NA	NA	NA	NA	NA	NA	-2.57806	0.0168732	0.113849	None	NA	NA	NA	NA	-4.04017	1.82729e-16	3.7429e-14	Down
chr4	154547298	154553990	+	3	79,83,121	KIAA0922	hsa_circ_0071311	6692	283	1	Cancer_specific	Exclusively_altered_in_ESCC	-1.4751	0.00189195	0.0185547	Down	NA	NA	NA	NA	NA	NA	NA	NA	NA	NA	NA	NA	NA	NA	NA	NA	NA	NA	NA	NA	NA	NA	NA	NA
chr4	156617907	156643344	+	7	367,62,59,710,486,144,155	GUCY1A3	hsa_circ_0125604	25437	1983	3	circRNA_altered_in_3_cancer_types	Consistently_altered	0.782982	0.0826811	0.243846	None	-1.27659	0.00204419	0.00938995	Down	-0.878645	0.00175241	0.0143992	None	NA	NA	NA	NA	-1.6605	0.000712911	0.0182525	Down	NA	NA	NA	NA	-1.58304	0.00121871	0.00616378	Down
chr4	166960490	166999182	+	9	103,117,146,196,126,161,181,126,128	TLL1	hsa_circ_0125725	38692	1284	2	circRNA_altered_in_2_cancer_types	Consistently_altered	-1.2718	0.00648307	0.0440552	Down	NA	NA	NA	NA	-1.5829	0.000896084	0.00800125	Down	NA	NA	NA	NA	-1.39935	0.0576486	0.214632	None	NA	NA	NA	NA	NA	NA	NA	NA
chr3	43341245	43345284	+	2	62,695	SNRK	hsa_circ_0004089	4039	757	1	Cancer_specific	Exclusively_altered_in_LUAD	-0.273497	0.312121	0.530758	None	NA	NA	NA	NA	-1.00525	3.61211e-09	3.15087e-07	Down	-0.0469115	0.816648	0.92523	None	0.183458	0.507001	0.715559	None	0.285331	0.246833	0.462165	None	-0.123372	0.521027	0.684126	None
chr3	71064699	71102924	-	5	105,205,154,90,138	FOXP1	hsa_circ_0001320	38225	692	2	circRNA_altered_in_2_cancer_types	Inconsistently_altered	-0.777704	0.0313512	0.129185	None	-0.635369	0.0724828	0.151582	None	-1.0311	0.000123748	0.00154209	Down	-0.15294	0.637069	0.827898	None	-0.173154	0.619942	0.80296	None	2.49561	1.65686e-05	0.000526497	Up	-0.392326	0.113892	0.223477	None
chr3	71739160	71759635	-	5	156,67,61,95,73	EIF4E3	hsa_circ_0066536	20475	452	1	Cancer_specific	Exclusively_altered_in_GBM	-0.559624	0.190881	0.39845	None	-1.45308	0.000913255	0.00481732	Down	0.27255	0.504385	0.716758	None	0.572026	0.118071	0.379118	None	-1.11276	0.0183411	0.116394	None	NA	NA	NA	NA	NA	NA	NA	NA
chr3	112968568	112969680	+	2	178,279	BOC	hsa_circ_0007897	1112	457	2	circRNA_altered_in_2_cancer_types	Consistently_altered	-1.61476	2.41998e-06	0.000105451	Down	0.823102	0.0267894	0.0690854	None	NA	NA	NA	NA	-0.417114	0.20764	0.501454	None	-1.36125	0.0167554	0.113849	None	NA	NA	NA	NA	-2.26346	7.69636e-07	1.1128e-05	Down
chr3	142455220	142467302	+	3	155,102,203	TRPC1	hsa_circ_0001345	12082	460	3	circRNA_altered_in_3_cancer_types	Inconsistently_altered	0.976642	0.0149204	0.0795297	None	1.00473	0.00759226	0.0257465	Up	-1.03814	0.000193906	0.00231463	Down	-0.201071	0.503074	0.75225	None	0.394854	0.32399	0.565461	None	2.19073	0.000397711	0.00478593	Up	-0.0827418	0.847732	0.910451	None
chr3	170906490	170912424	-	3	131,91,111	TNIK	hsa_circ_0002387	5934	333	1	Cancer_specific	Exclusively_altered_in_THCA	-0.461018	0.104431	0.276244	None	0.588202	0.0605283	0.131703	None	NA	NA	NA	NA	1.35629	0.000330954	0.00613344	Up	-0.652901	0.174749	0.397814	None	NA	NA	NA	NA	NA	NA	NA	NA
chr3	183361267	183382827	+	4	63,981,185,119	KLHL24	hsa_circ_0122951	21560	1348	2	circRNA_altered_in_2_cancer_types	Consistently_altered	0.849464	0.103806	0.275815	None	-0.856067	0.00301718	0.012569	None	-0.331461	0.294949	0.514573	None	-0.674338	0.0110451	0.0822352	None	-1.85421	0.00122117	0.0240248	Down	NA	NA	NA	NA	-1.10738	0.000967112	0.00503636	Down
chr2	36623756	36669878	+	3	174,243,121	CRIM1	hsa_circ_0002346	46122	538	2	circRNA_altered_in_2_cancer_types	Consistently_altered	-0.928645	0.0151738	0.0803891	None	0.189195	0.58403	0.702728	None	-1.46713	2.28819e-05	0.000376058	Down	NA	NA	NA	NA	-0.835831	0.101882	0.295535	None	NA	NA	NA	NA	-1.12489	0.000130387	0.000890254	Down
chr2	40655612	40657441	-	1	1829	SLC8A1	hsa_circ_0005232	1829	1829	1	Cancer_specific	Exclusively_altered_in_CRC	-0.422307	0.165832	0.364526	None	-0.173453	0.333798	0.476547	None	-0.377892	0.162895	0.345276	None	0.344579	0.429821	0.701958	None	-1.15931	0.0133429	0.100152	None	-0.793997	0.0627228	0.197577	None	-2.45765	1.37197e-12	1.1241e-10	Down
chr2	43969879	43973102	+	3	178,156,98	PLEKHH2	hsa_circ_0120105	3223	432	3	circRNA_altered_in_3_cancer_types	Consistently_altered	-1.17807	0.00522608	0.0383992	Down	1.08811	0.050953	0.114762	None	-1.12828	9.31343e-06	0.000176024	Down	NA	NA	NA	NA	-1.36979	0.0256555	0.134691	None	NA	NA	NA	NA	-1.22198	0.00522205	0.0193894	Down
chr2	48869540	48898819	+	5	56,85,590,261,90	STON1	hsa_circ_0120233	29279	1082	3	circRNA_altered_in_3_cancer_types	Consistently_altered	-1.68841	0.00455609	0.0352378	Down	0.68533	0.19982	0.328805	None	-1.52234	0.0628326	0.184591	None	NA	NA	NA	NA	-3.92974	0.000272709	0.0111325	Down	NA	NA	NA	NA	-2.82072	2.03622e-07	3.82373e-06	Down
chr2	71653589	71654544	+	1	955	ZNF638	hsa_circ_0120910	955	955	1	Cancer_specific	Exclusively_altered_in_CRC	-0.480473	0.0962047	0.267293	None	-0.642083	0.0203832	0.0556259	None	-0.13769	0.629284	0.809998	None	0.472694	0.0775678	0.300545	None	-0.591471	0.115321	0.317642	None	0.219791	0.517939	0.702304	None	-1.16352	0.000136822	0.000923926	Down
chr2	153431649	153437563	+	3	109,77,94	FMNL2	hsa_circ_0117669	5914	280	1	Cancer_specific	Exclusively_altered_in_ESCC	1.13298	0.0033027	0.0279447	Up	0.00206417	0.994062	0.995696	None	-0.0259536	0.950132	0.980307	None	-0.0840467	0.811944	0.92523	None	0.263632	0.617572	0.802114	None	NA	NA	NA	NA	NA	NA	NA	NA
chr2	160025760	160027316	+	2	123,282	TANC1	hsa_circ_0056810	1556	405	2	circRNA_altered_in_2_cancer_types	Inconsistently_altered	0.000972843	0.997956	0.999103	None	1.55087	0.000110468	0.000868894	Up	-2.11339	3.4845e-07	1.33392e-05	Down	0.0282535	0.925773	0.979773	None	-1.50643	0.00726691	0.0734449	None	NA	NA	NA	NA	-0.00968435	0.973591	0.988062	None
chr2	167304121	167328955	-	7	97,207,142,70,207,92,129	SCN7A	hsa_circ_0117954	24834	944	4	circRNA_altered_in_4_cancer_types	Consistently_altered	-3.03236	1.85526e-08	1.53987e-06	Down	NA	NA	NA	NA	-1.91834	4.26172e-12	1.61093e-09	Down	NA	NA	NA	NA	-2.39853	7.18254e-05	0.00547109	Down	NA	NA	NA	NA	-2.2143	1.03192e-07	2.07906e-06	Down
chr2	169547543	169574488	+	4	51,93,129,107	CERS6	hsa_circ_0007024	26945	380	1	Cancer_specific	Exclusively_altered_in_ESCC	-1.37516	0.000548244	0.00739283	Down	-0.229597	0.409114	0.554203	None	-0.339159	0.414624	0.647636	None	NA	NA	NA	NA	-0.943559	0.0360506	0.162045	None	NA	NA	NA	NA	NA	NA	NA	NA
chr2	173433468	173460751	+	5	77,99,111,114,195	PDK1	hsa_circ_0057105	27283	596	3	circRNA_altered_in_3_cancer_types	Consistently_altered	1.30053	0.00221975	0.0209137	Up	0.120613	0.759021	0.833965	None	2.33195	5.1301e-06	0.000105773	Up	0.893797	0.249176	0.544926	None	0.614062	0.403064	0.62207	None	2.11957	0.0010974	0.0102202	Up	NA	NA	NA	NA
chr2	203817281	203826149	+	4	121,130,85,190	CARF	hsa_circ_0003747	8868	526	1	Cancer_specific	Exclusively_altered_in_ESCC	-1.24026	0.00422467	0.0334709	Down	NA	NA	NA	NA	NA	NA	NA	NA	-0.162822	0.615951	0.816802	None	-1.04859	0.178913	0.404339	None	NA	NA	NA	NA	NA	NA	NA	NA
chr1	8555122	8617582	-	6	100,125,49,105,97,106	RERE	hsa_circ_0006837	62460	582	2	circRNA_altered_in_2_cancer_types	Consistently_altered	-1.3614	0.00142992	0.0151972	Down	-0.566635	0.00979595	0.0312404	None	-0.367585	0.189489	0.384841	None	-0.00247202	0.991388	0.995972	None	-1.43068	0.0086368	0.0811165	None	NA	NA	NA	NA	-1.91582	8.37016e-10	3.21467e-08	Down
chr1	8568685	8617582	-	4	49,105,97,106	RERE	hsa_circ_0005829	48897	357	1	Cancer_specific	Exclusively_altered_in_CRC	-1.10203	0.03751	0.142694	None	-0.831667	0.000544541	0.00318237	None	NA	NA	NA	NA	-0.0837202	0.837168	0.932928	None	-1.60115	0.00987021	0.0872281	None	NA	NA	NA	NA	-1.44148	0.00279019	0.0115849	Down
chr1	12638745	12639440	-	2	239,120	DHRS3	hsa_circ_0010023	695	359	2	circRNA_altered_in_2_cancer_types	Inconsistently_altered	-0.307352	0.374045	0.589476	None	NA	NA	NA	NA	NA	NA	NA	NA	1.59902	4.58572e-05	0.00128175	Up	0.0347537	0.934918	0.9661	None	-1.03463	0.000388383	0.00478113	Down	-0.129826	0.750055	0.856944	None
chr1	41578954	41608784	-	3	244,89,235	SCMH1	hsa_circ_0000063	29830	568	2	circRNA_altered_in_2_cancer_types	Consistently_altered	-0.0470286	0.876024	0.933798	None	-1.22591	0.00228531	0.0102755	Down	NA	NA	NA	NA	NA	NA	NA	NA	-1.04598	0.0473438	0.189596	None	NA	NA	NA	NA	-1.09727	0.00452978	0.0171295	Down
chr1	65830317	65831879	+	3	151,50,149	DNAJC6	hsa_circ_0002454	1562	350	2	circRNA_altered_in_2_cancer_types	Consistently_altered	-0.716185	0.0643782	0.204876	None	-1.26128	4.92107e-08	2.99816e-06	Down	-1.32689	0.00390844	0.0266998	Down	0.474495	0.231141	0.532265	None	-1.88318	0.00688207	0.0714588	None	NA	NA	NA	NA	NA	NA	NA	NA
chr1	95609446	95616975	+	4	166,90,59,95	TMEM56	hsa_circ_0000095	7529	410	1	Cancer_specific	Exclusively_altered_in_HCC	-0.369873	0.284459	0.503363	None	-0.78497	0.00751552	0.0256517	None	0.0981119	0.763437	0.875838	None	0.0943469	0.717205	0.882276	None	-1.03996	0.0103841	0.0886741	None	-1.04994	9.44665e-05	0.00171481	Down	-0.0331563	0.897313	0.946207	None
chr1	155490890	155491409	-	1	519	ASH1L	hsa_circ_0014592	519	519	1	Cancer_specific	Exclusively_altered_in_HCC	0.00638505	0.986116	0.992378	None	NA	NA	NA	NA	NA	NA	NA	NA	NA	NA	NA	NA	0.230671	0.685086	0.846555	None	1.12675	0.000763843	0.00800651	Up	NA	NA	NA	NA
chr1	204970297	204971876	+	2	117,153	NFASC	hsa_circ_0111758	1579	270	2	circRNA_altered_in_2_cancer_types	Consistently_altered	-2.96883	3.39524e-05	0.000887377	Down	-1.79274	0.000100476	0.000818927	Down	NA	NA	NA	NA	NA	NA	NA	NA	-2.58098	0.0400884	0.169899	None	NA	NA	NA	NA	NA	NA	NA	NA
chr1	243708811	243736350	-	4	88,215,129,123	AKT3	hsa_circ_0000199	27539	555	1	Cancer_specific	Exclusively_altered_in_GC	0.4041	0.187623	0.394968	None	0.185488	0.41555	0.56043	None	-0.643088	0.15525	0.333083	None	0.4906	0.122528	0.388309	None	-1.2348	0.00258405	0.0418907	Down	NA	NA	NA	NA	NA	NA	NA	NA
chr1	243708811	244006584	-	11	88,215,129,123,69,66,132,145,112,126,158	AKT3	hsa_circ_0017242	297773	1363	2	circRNA_altered_in_2_cancer_types	Consistently_altered	0.356039	0.364145	0.582299	None	-1.11364	5.84511e-05	0.000519874	Down	NA	NA	NA	NA	-0.034588	0.909039	0.968779	None	-2.3617	0.00105808	0.0230332	Down	NA	NA	NA	NA	NA	NA	NA	NA
chr1	243776972	244006584	-	7	69,66,132,145,112,126,158	AKT3	hsa_circ_0017252	229612	808	1	Cancer_specific	Exclusively_altered_in_CRC	0.0929131	0.78691	0.891797	None	-0.754272	0.000409223	0.00255712	None	-0.501843	0.117449	0.287001	None	0.0684636	0.76784	0.902696	None	-0.299475	0.436171	0.648532	None	NA	NA	NA	NA	-1.26102	0.00777357	0.026612	Down
chr1	244715623	244724447	+	2	493,478	C1orf101	hsa_circ_0006080	8824	971	1	Cancer_specific	Exclusively_altered_in_LUAD	-0.701846	0.103036	0.274975	None	-0.796447	0.0107823	0.0335586	None	-1.23332	0.00728357	0.0419267	Down	-0.288844	0.259622	0.55614	None	-1.63098	0.0216229	0.126565	None	NA	NA	NA	NA	NA	NA	NA	NA
chr8	22054192	22054933	+	2	161,181	BMP1	hsa_circ_0002075	741	342	1	Cancer_specific	Exclusively_altered_in_CRC	-0.14792	0.606043	0.773933	None	NA	NA	NA	NA	NA	NA	NA	NA	NA	NA	NA	NA	-0.95146	0.0812669	0.258262	None	-0.549054	0.322816	0.53853	None	-2.48427	2.05342e-07	3.82373e-06	Down
chr8	30332294	30361953	+	4	78,39,63,151	RBPMS	hsa_circ_0006539	29659	331	3	circRNA_altered_in_3_cancer_types	Consistently_altered	-1.14368	0.00378442	0.0305382	Down	NA	NA	NA	NA	NA	NA	NA	NA	-0.14715	0.494881	0.74696	None	-1.52486	0.000252464	0.0111325	Down	-0.0526215	0.914497	0.961164	None	-2.28207	6.53003e-08	1.43311e-06	Down
chr8	72964773	72988862	+	2	78,107	RP11-383H13.1	hsa_circ_0002503	24089	185	1	Cancer_specific	Exclusively_altered_in_ESCC	1.902	0.000101163	0.00222205	Up	NA	NA	NA	NA	NA	NA	NA	NA	NA	NA	NA	NA	NA	NA	NA	NA	NA	NA	NA	NA	NA	NA	NA	NA
chr8	90734242	90737869	-	3	142,338,124	RP11-37B2.1	hsa_circ_0008587	3627	604	1	Cancer_specific	Exclusively_altered_in_CRC	0.156951	0.728406	0.8599	None	0.748352	0.00287408	0.0122236	None	-0.75308	0.0319761	0.115114	None	-0.153993	0.538072	0.772884	None	-0.025956	0.96599	0.979503	None	NA	NA	NA	NA	-1.16712	0.00900143	0.0300618	Down
chr8	97847200	97892233	+	2	208,208	CPQ	hsa_circ_0004762	45033	416	1	Cancer_specific	Exclusively_altered_in_ESCC	-1.70565	0.000150447	0.00291366	Down	NA	NA	NA	NA	NA	NA	NA	NA	-0.382703	0.18997	0.474924	None	-1.00123	0.0397571	0.168878	None	NA	NA	NA	NA	NA	NA	NA	NA
chr13	52971366	52972329	-	1	963	THSD1	hsa_circ_0008776	963	963	2	circRNA_altered_in_2_cancer_types	Inconsistently_altered	0.407846	0.327283	0.545368	None	1.39428	1.66575e-05	0.000200961	Up	-1.03336	0.0039672	0.0267786	Down	NA	NA	NA	NA	-0.553306	0.438473	0.650918	None	NA	NA	NA	NA	NA	NA	NA	NA
chrX	117676687	117680079	+	5	117,90,83,70,96	DOCK11	hsa_circ_0139638	3392	456	1	Cancer_specific	Exclusively_altered_in_GC	-0.0851024	0.851217	0.92383	None	NA	NA	NA	NA	0.557255	0.106634	0.266351	None	0.287104	0.329026	0.627101	None	-1.82565	0.00264272	0.0418907	Down	NA	NA	NA	NA	-0.710739	0.0616591	0.1393	None
chr7	72617462	72618644	+	2	42,42	RP11-396K3.1	hsa_circ_0002284	1182	84	2	circRNA_altered_in_2_cancer_types	Consistently_altered	1.49994	0.00198433	0.0191087	Up	NA	NA	NA	NA	1.30102	0.000547352	0.00526015	Up	NA	NA	NA	NA	0.407449	0.517723	0.722647	None	NA	NA	NA	NA	NA	NA	NA	NA
chr7	90355880	90356126	+	1	246	CDK14	hsa_circ_0001721	246	246	1	Cancer_specific	Exclusively_altered_in_ESCC	1.74342	5.86057e-06	0.000212812	Up	NA	NA	NA	NA	NA	NA	NA	NA	NA	NA	NA	NA	NA	NA	NA	NA	NA	NA	NA	NA	NA	NA	NA	NA
chr5	74130250	74137504	-	4	172,86,100,135	FAM169A	hsa_circ_0004405	7254	493	2	circRNA_altered_in_2_cancer_types	Consistently_altered	1.86078	0.000532459	0.00730769	Up	-0.494818	0.0306275	0.0757442	None	NA	NA	NA	NA	-0.442366	0.182064	0.469261	None	NA	NA	NA	NA	1.37275	0.00294945	0.0220899	Up	NA	NA	NA	NA
chr2	168920009	168986268	-	6	71,63,30,123,66,49	STK39	hsa_circ_0005882	66259	402	1	Cancer_specific	Exclusively_altered_in_GBM	-1.11631	0.00899723	0.0554141	None	-1.38541	0.000564884	0.00324167	Down	NA	NA	NA	NA	NA	NA	NA	NA	-0.531988	0.395916	0.617089	None	NA	NA	NA	NA	NA	NA	NA	NA
chr1	225140371	225156576	+	6	110,140,150,131,153,116	DNAH14	hsa_circ_0016599	16205	800	1	Cancer_specific	Exclusively_altered_in_ESCC	4.03952	0.000168521	0.00315841	Up	NA	NA	NA	NA	NA	NA	NA	NA	NA	NA	NA	NA	2.36355	0.0403993	0.170829	None	NA	NA	NA	NA	NA	NA	NA	NA
chr11	89133184	89135710	-	3	63,165,217	NOX4	hsa_circ_0023984	2526	445	1	Cancer_specific	Exclusively_altered_in_ESCC	2.82938	6.88798e-11	1.33397e-08	Up	0.362272	0.403144	0.547028	None	NA	NA	NA	NA	NA	NA	NA	NA	NA	NA	NA	NA	NA	NA	NA	NA	NA	NA	NA	NA
chr4	107092251	107133992	-	4	176,162,37,86	TBCK	hsa_circ_0007540	41741	461	1	Cancer_specific	Exclusively_altered_in_GBM	-0.138288	0.755775	0.877041	None	-1.00837	4.74633e-06	7.56e-05	Down	-0.961448	0.000200286	0.00236588	None	0.364212	0.194718	0.482474	None	-0.440991	0.451534	0.665197	None	-0.335511	0.42858	0.63739	None	-0.10513	0.808239	0.888986	None
chr2	216238044	216256537	-	13	90,180,90,177,88,188,114,156,165,117,270,90,183	FN1	hsa_circ_0058092	18493	1908	1	Cancer_specific	Exclusively_altered_in_ESCC	3.10262	0.000154551	0.00296024	Up	NA	NA	NA	NA	-0.163289	0.784659	0.889099	None	NA	NA	NA	NA	NA	NA	NA	NA	NA	NA	NA	NA	NA	NA	NA	NA
chr20	52773707	52788209	-	9	121,198,79,167,146,112,92,97,94	CYP24A1	hsa_circ_0060927	14502	1106	2	circRNA_altered_in_2_cancer_types	Consistently_altered	3.22924	0.000140262	0.00274692	Up	NA	NA	NA	NA	5.76121	5.17769e-05	0.000752756	Up	NA	NA	NA	NA	NA	NA	NA	NA	NA	NA	NA	NA	NA	NA	NA	NA
chr13	20600751	20633702	+	9	151,116,117,151,173,166,35,130,116	ZMYM2	hsa_circ_0099988	32951	1155	1	Cancer_specific	Exclusively_altered_in_GBM	NA	NA	NA	NA	-1.35901	0.00329728	0.0133258	Down	NA	NA	NA	NA	NA	NA	NA	NA	NA	NA	NA	NA	NA	NA	NA	NA	NA	NA	NA	NA
chr13	21961646	21987911	-	6	127,133,121,33,70,121	ZDHHC20	hsa_circ_0100057	26265	605	1	Cancer_specific	Exclusively_altered_in_GBM	NA	NA	NA	NA	-1.82572	0.00265029	0.0114721	Down	NA	NA	NA	NA	NA	NA	NA	NA	NA	NA	NA	NA	NA	NA	NA	NA	NA	NA	NA	NA
chr13	21974511	21995303	-	5	121,33,70,121,104	ZDHHC20	hsa_circ_0100061	20792	449	1	Cancer_specific	Exclusively_altered_in_GBM	NA	NA	NA	NA	-1.34709	0.00378092	0.0148614	Down	NA	NA	NA	NA	NA	NA	NA	NA	NA	NA	NA	NA	NA	NA	NA	NA	NA	NA	NA	NA
chr13	35615069	35644989	+	9	232,101,96,122,127,120,147,198,134	NBEA	hsa_circ_0029976	29920	1277	1	Cancer_specific	Exclusively_altered_in_GC	NA	NA	NA	NA	-0.838214	0.0057847	0.0206705	None	NA	NA	NA	NA	0.0905165	0.815003	0.92523	None	-3.15347	0.000501546	0.0148792	Down	NA	NA	NA	NA	NA	NA	NA	NA
chr13	40268770	40301685	+	7	92,118,132,168,108,54,80	COG6	hsa_circ_0030034	32915	752	1	Cancer_specific	Exclusively_altered_in_GBM	NA	NA	NA	NA	-1.61349	3.48674e-06	5.81998e-05	Down	NA	NA	NA	NA	-0.25805	0.495052	0.74696	None	NA	NA	NA	NA	NA	NA	NA	NA	NA	NA	NA	NA
chr13	42335263	42407667	-	9	77,72,107,107,116,78,169,114,161	VWA8	hsa_circ_0030101	72404	1001	1	Cancer_specific	Exclusively_altered_in_GBM	NA	NA	NA	NA	-1.19175	0.000523732	0.00308293	Down	NA	NA	NA	NA	NA	NA	NA	NA	NA	NA	NA	NA	NA	NA	NA	NA	NA	NA	NA	NA
chr13	42742575	42764661	+	7	109,140,85,86,100,274,123	DGKH	hsa_circ_0100496	22086	917	1	Cancer_specific	Exclusively_altered_in_GBM	NA	NA	NA	NA	-2.84779	7.52422e-10	1.46454e-07	Down	NA	NA	NA	NA	NA	NA	NA	NA	NA	NA	NA	NA	NA	NA	NA	NA	NA	NA	NA	NA
chr13	42742575	42784901	+	15	109,140,85,86,100,274,123,132,118,111,97,108,114,135,164	DGKH	hsa_circ_0100498	42326	1896	1	Cancer_specific	Exclusively_altered_in_GBM	NA	NA	NA	NA	-2.01102	0.000262279	0.00176081	Down	NA	NA	NA	NA	NA	NA	NA	NA	NA	NA	NA	NA	NA	NA	NA	NA	NA	NA	NA	NA
chr13	42769020	42784901	+	8	132,118,111,97,108,114,135,164	DGKH	hsa_circ_0030135	15881	979	1	Cancer_specific	Exclusively_altered_in_GBM	NA	NA	NA	NA	-1.93128	0.00050118	0.0029645	Down	NA	NA	NA	NA	NA	NA	NA	NA	NA	NA	NA	NA	NA	NA	NA	NA	NA	NA	NA	NA
chr13	78293666	78320990	+	3	140,150,342	SLAIN1	hsa_circ_0100928	27324	632	1	Cancer_specific	Exclusively_altered_in_GBM	NA	NA	NA	NA	-1.5375	8.75456e-05	0.000733157	Down	NA	NA	NA	NA	NA	NA	NA	NA	NA	NA	NA	NA	NA	NA	NA	NA	NA	NA	NA	NA
chr13	78293666	78327493	+	4	140,150,342,156	SLAIN1	hsa_circ_0000497	33827	788	1	Cancer_specific	Exclusively_altered_in_GBM	NA	NA	NA	NA	-1.52726	1.07197e-07	5.02382e-06	Down	0.630682	0.0256055	0.0994404	None	-0.532127	0.0322396	0.169134	None	0.594443	0.300615	0.54128	None	-0.822573	0.0278573	0.108099	None	0.264341	0.542944	0.703138	None
chr13	78318417	78327493	+	3	150,342,156	SLAIN1	hsa_circ_0100935	9076	648	1	Cancer_specific	Exclusively_altered_in_GBM	NA	NA	NA	NA	-1.59872	9.36161e-07	2.32798e-05	Down	NA	NA	NA	NA	NA	NA	NA	NA	NA	NA	NA	NA	NA	NA	NA	NA	NA	NA	NA	NA
chr13	79915257	79918929	-	4	105,168,75,126	RBM26	hsa_circ_0030533	3672	474	1	Cancer_specific	Exclusively_altered_in_GBM	NA	NA	NA	NA	-1.44096	2.62103e-06	4.66238e-05	Down	NA	NA	NA	NA	NA	NA	NA	NA	NA	NA	NA	NA	NA	NA	NA	NA	NA	NA	NA	NA
chr13	96577933	96592345	-	5	95,99,124,165,135	UGGT2	hsa_circ_0101069	14412	618	1	Cancer_specific	Exclusively_altered_in_THCA	NA	NA	NA	NA	-0.2868	0.213282	0.342287	None	NA	NA	NA	NA	-1.1372	0.00321611	0.0340588	Down	0.0644234	0.923235	0.960017	None	NA	NA	NA	NA	NA	NA	NA	NA
chr13	100959445	101101559	+	7	69,76,111,103,103,99,54	PCCA	hsa_circ_0030768	142114	615	1	Cancer_specific	Exclusively_altered_in_GBM	NA	NA	NA	NA	-1.12247	0.0135001	0.0403183	Down	NA	NA	NA	NA	NA	NA	NA	NA	NA	NA	NA	NA	NA	NA	NA	NA	NA	NA	NA	NA
chr13	101997616	102051516	-	6	155,129,140,84,183,147	NALCN	hsa_circ_0099761	53900	838	1	Cancer_specific	Exclusively_altered_in_GBM	NA	NA	NA	NA	-1.83551	1.96473e-06	3.77012e-05	Down	NA	NA	NA	NA	NA	NA	NA	NA	NA	NA	NA	NA	NA	NA	NA	NA	NA	NA	NA	NA
chr13	102029050	102051516	-	5	129,140,84,183,147	NALCN	hsa_circ_0099765	22466	683	1	Cancer_specific	Exclusively_altered_in_GBM	NA	NA	NA	NA	-1.36944	0.000672863	0.00377827	Down	NA	NA	NA	NA	NA	NA	NA	NA	NA	NA	NA	NA	NA	NA	NA	NA	NA	NA	NA	NA
chr13	109318233	109379931	+	3	264,71,144	MYO16	hsa_circ_0099842	61698	479	1	Cancer_specific	Exclusively_altered_in_GBM	NA	NA	NA	NA	1.1238	0.00504987	0.0186746	Up	NA	NA	NA	NA	NA	NA	NA	NA	NA	NA	NA	NA	NA	NA	NA	NA	NA	NA	NA	NA
chr13	109535406	109562498	+	4	128,106,118,148	MYO16	hsa_circ_0099865	27092	500	1	Cancer_specific	Exclusively_altered_in_GBM	NA	NA	NA	NA	1.67149	7.34162e-05	0.000627773	Up	NA	NA	NA	NA	NA	NA	NA	NA	NA	NA	NA	NA	NA	NA	NA	NA	NA	NA	NA	NA
chr13	111857635	111885640	+	4	85,131,202,89	ARHGEF7	hsa_circ_0030914	28005	507	1	Cancer_specific	Exclusively_altered_in_GBM	NA	NA	NA	NA	-1.03463	0.00193374	0.00903597	Down	NA	NA	NA	NA	NA	NA	NA	NA	NA	NA	NA	NA	NA	NA	NA	NA	NA	NA	NA	NA
chr12	1399017	1481143	+	2	161,145	ERC1	hsa_circ_0024997	82126	306	1	Cancer_specific	Exclusively_altered_in_GBM	NA	NA	NA	NA	-1.3453	0.0171194	0.0483991	Down	NA	NA	NA	NA	NA	NA	NA	NA	NA	NA	NA	NA	NA	NA	NA	NA	NA	NA	NA	NA
chr12	6442234	6443410	-	4	79,150,129,154	TNFRSF1A	hsa_circ_0025128	1176	512	1	Cancer_specific	Exclusively_altered_in_CRC	NA	NA	NA	NA	0.697404	0.183007	0.308643	None	NA	NA	NA	NA	NA	NA	NA	NA	-0.777307	0.300111	0.54128	None	NA	NA	NA	NA	-1.20373	0.00573683	0.020737	Down
chr12	12022357	12022903	+	1	546	ETV6	hsa_circ_0004123	546	546	1	Cancer_specific	Exclusively_altered_in_GBM	NA	NA	NA	NA	1.8058	0.000433532	0.00266125	Up	NA	NA	NA	NA	NA	NA	NA	NA	-1.59785	0.0108522	0.0905484	None	NA	NA	NA	NA	NA	NA	NA	NA
chr12	22637630	22659753	-	4	192,96,115,109	C2CD5	hsa_circ_0025612	22123	512	1	Cancer_specific	Exclusively_altered_in_GBM	NA	NA	NA	NA	-1.40817	7.55484e-07	1.95863e-05	Down	NA	NA	NA	NA	NA	NA	NA	NA	NA	NA	NA	NA	NA	NA	NA	NA	NA	NA	NA	NA
chr12	22646156	22659753	-	2	115,109	C2CD5	hsa_circ_0025614	13597	224	1	Cancer_specific	Exclusively_altered_in_GBM	NA	NA	NA	NA	-1.46113	0.00193001	0.00903597	Down	NA	NA	NA	NA	NA	NA	NA	NA	NA	NA	NA	NA	NA	NA	NA	NA	NA	NA	NA	NA
chr12	27521194	27543172	+	7	151,42,158,80,93,118,144	ARNTL2	hsa_circ_0025721	21978	786	1	Cancer_specific	Exclusively_altered_in_GBM	NA	NA	NA	NA	-1.36262	0.00651286	0.0228397	Down	NA	NA	NA	NA	NA	NA	NA	NA	NA	NA	NA	NA	NA	NA	NA	NA	NA	NA	NA	NA
chr12	28544236	28605587	+	4	108,93,69,177	CCDC91	hsa_circ_0098289	61351	447	1	Cancer_specific	Exclusively_altered_in_GBM	NA	NA	NA	NA	-1.45708	0.00197813	0.00914746	Down	NA	NA	NA	NA	NA	NA	NA	NA	NA	NA	NA	NA	NA	NA	NA	NA	NA	NA	NA	NA
chr12	42745686	42792796	+	7	165,62,212,57,80,120,141	PPHLN1	hsa_circ_0004815	47110	837	1	Cancer_specific	Exclusively_altered_in_GBM	NA	NA	NA	NA	-1.25293	2.54378e-05	0.000270707	Down	-0.815946	0.0601585	0.179055	None	0.505218	0.0319586	0.168698	None	0.131184	0.804517	0.907967	None	NA	NA	NA	NA	NA	NA	NA	NA
chr12	45059266	45108524	-	4	126,129,103,92	NELL2	hsa_circ_0098587	49258	450	1	Cancer_specific	Exclusively_altered_in_GBM	NA	NA	NA	NA	-1.72639	1.87544e-05	0.000221123	Down	NA	NA	NA	NA	NA	NA	NA	NA	NA	NA	NA	NA	NA	NA	NA	NA	NA	NA	NA	NA
chr12	46285562	46287504	+	4	139,86,124,92	ARID2	hsa_circ_0004985	1942	441	1	Cancer_specific	Exclusively_altered_in_GBM	NA	NA	NA	NA	1.18021	0.000158821	0.00116231	Up	NA	NA	NA	NA	-0.0424211	0.903564	0.965879	None	0.220629	0.739879	0.881347	None	NA	NA	NA	NA	NA	NA	NA	NA
chr12	49333437	49334971	-	3	125,111,241	RP11-302B13.5	hsa_circ_0003770	1534	477	1	Cancer_specific	Exclusively_altered_in_GBM	NA	NA	NA	NA	-1.09167	0.0175384	0.0493542	Down	NA	NA	NA	NA	NA	NA	NA	NA	NA	NA	NA	NA	NA	NA	NA	NA	NA	NA	NA	NA
chr12	56871443	56872046	-	3	59,164,80	GLS2	hsa_circ_0098835	603	303	2	circRNA_altered_in_2_cancer_types	Consistently_altered	NA	NA	NA	NA	-1.73776	0.000777014	0.00425525	Down	NA	NA	NA	NA	NA	NA	NA	NA	NA	NA	NA	NA	-2.32542	5.79875e-05	0.00128103	Down	NA	NA	NA	NA
chr12	70149163	70150443	+	2	276,259	RAB3IP	hsa_circ_0099132	1280	535	1	Cancer_specific	Exclusively_altered_in_GBM	NA	NA	NA	NA	1.71901	0.00617529	0.0218104	Up	NA	NA	NA	NA	NA	NA	NA	NA	NA	NA	NA	NA	NA	NA	NA	NA	NA	NA	NA	NA
chr12	78360008	78415642	+	6	73,184,69,140,1027,116	NAV3	hsa_circ_0008877	55634	1609	1	Cancer_specific	Exclusively_altered_in_GBM	NA	NA	NA	NA	-1.71546	0.00138113	0.00685503	Down	NA	NA	NA	NA	NA	NA	NA	NA	NA	NA	NA	NA	NA	NA	NA	NA	NA	NA	NA	NA
chr12	79611282	79693331	+	5	183,185,123,168,168	SYT1	hsa_circ_0027661	82049	827	1	Cancer_specific	Exclusively_altered_in_GBM	NA	NA	NA	NA	-2.30663	0.000155718	0.00114302	Down	NA	NA	NA	NA	NA	NA	NA	NA	NA	NA	NA	NA	NA	NA	NA	NA	NA	NA	NA	NA
chr12	79679566	79693331	+	4	185,123,168,168	SYT1	hsa_circ_0099287	13765	644	1	Cancer_specific	Exclusively_altered_in_GBM	NA	NA	NA	NA	-1.89197	3.04726e-07	1.01728e-05	Down	NA	NA	NA	NA	NA	NA	NA	NA	NA	NA	NA	NA	NA	NA	NA	NA	NA	NA	NA	NA
chr12	81719555	81778023	-	14	94,155,131,30,238,221,136,92,63,132,84,135,147,222	PPFIA2	hsa_circ_0099329	58468	1880	1	Cancer_specific	Exclusively_altered_in_GBM	NA	NA	NA	NA	-2.12456	0.000131065	0.000998144	Down	NA	NA	NA	NA	NA	NA	NA	NA	NA	NA	NA	NA	NA	NA	NA	NA	NA	NA	NA	NA
chr12	88898935	88939642	-	8	77,68,110,84,157,171,63,114	KITLG	hsa_circ_0002375	40707	844	2	circRNA_altered_in_2_cancer_types	Consistently_altered	NA	NA	NA	NA	-0.797073	0.00553718	0.0199028	None	-1.69584	1.99001e-11	4.51333e-09	Down	NA	NA	NA	NA	-1.25463	0.00994092	0.0872281	None	NA	NA	NA	NA	-1.18821	0.0010984	0.00564823	Down
chr12	90013775	90029028	-	8	242,243,215,162,39,141,126,255	ATP2B1	hsa_circ_0099456	15253	1423	1	Cancer_specific	Exclusively_altered_in_GBM	NA	NA	NA	NA	-1.47076	0.000147409	0.00109858	Down	NA	NA	NA	NA	NA	NA	NA	NA	NA	NA	NA	NA	NA	NA	NA	NA	NA	NA	NA	NA
chr12	99145132	99225914	-	8	168,138,87,12,72,129,180,108	ANKS1B	hsa_circ_0099665	80782	894	1	Cancer_specific	Exclusively_altered_in_GBM	NA	NA	NA	NA	-1.76909	0.000171239	0.0012383	Down	NA	NA	NA	NA	NA	NA	NA	NA	NA	NA	NA	NA	NA	NA	NA	NA	NA	NA	NA	NA
chr12	99166819	99225914	-	7	138,87,12,72,129,180,108	ANKS1B	hsa_circ_0099671	59095	726	1	Cancer_specific	Exclusively_altered_in_GBM	NA	NA	NA	NA	-1.45036	4.90651e-05	0.000461667	Down	NA	NA	NA	NA	NA	NA	NA	NA	NA	NA	NA	NA	NA	NA	NA	NA	NA	NA	NA	NA
chr12	99192711	99225914	-	4	72,129,180,108	ANKS1B	hsa_circ_0099680	33203	489	1	Cancer_specific	Exclusively_altered_in_GBM	NA	NA	NA	NA	-1.68457	7.96928e-08	4.22199e-06	Down	NA	NA	NA	NA	NA	NA	NA	NA	NA	NA	NA	NA	NA	NA	NA	NA	NA	NA	NA	NA
chr12	100166699	100206089	-	6	167,114,102,76,297,157	ANKS1B	hsa_circ_0096921	39390	913	1	Cancer_specific	Exclusively_altered_in_GBM	NA	NA	NA	NA	-1.53671	0.00166263	0.00802341	Down	NA	NA	NA	NA	NA	NA	NA	NA	NA	NA	NA	NA	NA	NA	NA	NA	NA	NA	NA	NA
chr12	101316003	101381448	+	6	105,137,159,101,107,132	ANO4	hsa_circ_0027871	65445	741	1	Cancer_specific	Exclusively_altered_in_GBM	NA	NA	NA	NA	-1.44324	0.00133161	0.00664984	Down	NA	NA	NA	NA	NA	NA	NA	NA	NA	NA	NA	NA	NA	NA	NA	NA	NA	NA	NA	NA
chr12	101365083	101381448	+	3	101,107,132	ANO4	hsa_circ_0008008	16365	340	1	Cancer_specific	Exclusively_altered_in_GBM	NA	NA	NA	NA	-1.5288	3.86365e-05	0.000382753	Down	NA	NA	NA	NA	NA	NA	NA	NA	NA	NA	NA	NA	NA	NA	NA	NA	NA	NA	NA	NA
chr12	111757815	111760384	+	2	764,160	CUX2	hsa_circ_0097312	2569	924	1	Cancer_specific	Exclusively_altered_in_GBM	NA	NA	NA	NA	-2.45936	5.62029e-05	0.000507284	Down	NA	NA	NA	NA	NA	NA	NA	NA	NA	NA	NA	NA	NA	NA	NA	NA	NA	NA	NA	NA
chr12	112371689	112381173	-	5	145,139,84,50,105	TMEM116	hsa_circ_0004206	9484	523	1	Cancer_specific	Exclusively_altered_in_CRC	NA	NA	NA	NA	0.0474238	0.871551	0.910463	None	-0.911927	0.0165798	0.0755082	None	-0.515018	0.145102	0.417279	None	-0.730912	0.225993	0.45738	None	NA	NA	NA	NA	-1.33878	0.0029785	0.0121614	Down
chr12	124934360	124979914	-	7	53,57,114,180,178,128,222	NCOR2	hsa_circ_0005750	45554	932	1	Cancer_specific	Exclusively_altered_in_GBM	NA	NA	NA	NA	1.87605	2.58939e-06	4.63997e-05	Up	NA	NA	NA	NA	NA	NA	NA	NA	NA	NA	NA	NA	NA	NA	NA	NA	NA	NA	NA	NA
chr12	130184354	130185243	-	1	889	TMEM132D	hsa_circ_0097876	889	889	1	Cancer_specific	Exclusively_altered_in_GBM	NA	NA	NA	NA	-1.63663	0.000453157	0.00276086	Down	NA	NA	NA	NA	1.87988	0.142184	0.414136	None	-0.124873	0.954616	0.973365	None	NA	NA	NA	NA	NA	NA	NA	NA
chr12	130884223	130907106	-	6	135,72,104,169,182,109	RIMBP2	hsa_circ_0097878	22883	771	1	Cancer_specific	Exclusively_altered_in_GBM	NA	NA	NA	NA	-2.01639	2.22807e-06	4.08256e-05	Down	NA	NA	NA	NA	NA	NA	NA	NA	NA	NA	NA	NA	NA	NA	NA	NA	NA	NA	NA	NA
chr11	8248521	8252051	-	2	126,214	LMO1	hsa_circ_0021087	3530	340	1	Cancer_specific	Exclusively_altered_in_GBM	NA	NA	NA	NA	3.07071	3.34762e-06	5.705e-05	Up	NA	NA	NA	NA	NA	NA	NA	NA	NA	NA	NA	NA	NA	NA	NA	NA	NA	NA	NA	NA
chr11	8457040	8486369	-	8	86,113,76,85,89,139,105,114	STK33	hsa_circ_0021089	29329	807	2	circRNA_altered_in_2_cancer_types	Inconsistently_altered	NA	NA	NA	NA	1.34883	8.70686e-05	0.000731676	Up	NA	NA	NA	NA	-0.68351	0.0017918	0.0221378	None	-0.629175	0.199222	0.4248	None	NA	NA	NA	NA	-2.82067	7.78913e-09	2.17564e-07	Down
chr11	10011043	10024236	-	7	99,129,114,78,114,109,133	SBF2	hsa_circ_0094701	13193	776	1	Cancer_specific	Exclusively_altered_in_LUAD	NA	NA	NA	NA	-0.369414	0.278352	0.420027	None	-1.13526	0.00393887	0.0267466	Down	0.0715036	0.846058	0.936376	None	0.15514	0.791031	0.90369	None	NA	NA	NA	NA	NA	NA	NA	NA
chr11	11348632	11362551	-	3	96,138,186	GALNT18	hsa_circ_0095025	13919	420	1	Cancer_specific	Exclusively_altered_in_GBM	NA	NA	NA	NA	-1.07657	0.00519901	0.019025	Down	NA	NA	NA	NA	NA	NA	NA	NA	NA	NA	NA	NA	-1.20399	0.0694588	0.212544	None	NA	NA	NA	NA
chr11	13424714	13443385	-	6	111,198,121,103,286,197	BTBD10	hsa_circ_0095385	18671	1016	1	Cancer_specific	Exclusively_altered_in_GBM	NA	NA	NA	NA	-2.09263	7.53006e-05	0.000641635	Down	NA	NA	NA	NA	NA	NA	NA	NA	NA	NA	NA	NA	NA	NA	NA	NA	NA	NA	NA	NA
chr11	13424714	13466728	-	7	111,198,121,103,286,197,158	BTBD10	hsa_circ_0095386	42014	1174	1	Cancer_specific	Exclusively_altered_in_GBM	NA	NA	NA	NA	-2.20666	6.26612e-06	9.36772e-05	Down	NA	NA	NA	NA	NA	NA	NA	NA	NA	NA	NA	NA	NA	NA	NA	NA	NA	NA	NA	NA
chr11	16036487	16119234	-	6	109,188,184,150,123,80	SOX6	hsa_circ_0095441	82747	834	1	Cancer_specific	Exclusively_altered_in_GBM	NA	NA	NA	NA	1.76051	0.00011348	0.000880731	Up	NA	NA	NA	NA	NA	NA	NA	NA	NA	NA	NA	NA	NA	NA	NA	NA	NA	NA	NA	NA
chr11	16068059	16077447	-	3	188,184,150	SOX6	hsa_circ_0095442	9388	522	1	Cancer_specific	Exclusively_altered_in_GBM	NA	NA	NA	NA	1.95439	1.74821e-08	1.42013e-06	Up	NA	NA	NA	NA	NA	NA	NA	NA	NA	NA	NA	NA	NA	NA	NA	NA	NA	NA	NA	NA
chr11	16068059	16119234	-	5	188,184,150,123,80	SOX6	hsa_circ_0095443	51175	725	1	Cancer_specific	Exclusively_altered_in_GBM	NA	NA	NA	NA	1.90316	3.66045e-05	0.000364102	Up	NA	NA	NA	NA	NA	NA	NA	NA	NA	NA	NA	NA	NA	NA	NA	NA	NA	NA	NA	NA
chr11	17899754	18029623	-	9	37,159,63,114,79,61,95,156,136	SERGEF	hsa_circ_0021411	129869	900	1	Cancer_specific	Exclusively_altered_in_THCA	NA	NA	NA	NA	-0.0465537	0.924186	0.945923	None	NA	NA	NA	NA	1.46107	0.000329286	0.00613344	Up	0.72187	0.338953	0.574846	None	NA	NA	NA	NA	NA	NA	NA	NA
chr11	18010143	18029623	-	8	159,63,114,79,61,95,156,136	SERGEF	hsa_circ_0021412	19480	863	1	Cancer_specific	Exclusively_altered_in_GBM	NA	NA	NA	NA	-1.14972	0.000531546	0.00311389	Down	NA	NA	NA	NA	NA	NA	NA	NA	0.910908	0.209297	0.43687	None	NA	NA	NA	NA	NA	NA	NA	NA
chr11	22696395	22777499	+	6	165,122,142,64,142,108	GAS2	hsa_circ_0095626	81104	743	1	Cancer_specific	Exclusively_altered_in_GBM	NA	NA	NA	NA	-1.54281	1.43748e-06	2.94381e-05	Down	NA	NA	NA	NA	NA	NA	NA	NA	NA	NA	NA	NA	-0.21612	0.633334	0.779656	None	NA	NA	NA	NA
chr11	24927536	25004839	+	4	63,63,75,168	LUZP2	hsa_circ_0095637	77303	369	1	Cancer_specific	Exclusively_altered_in_GBM	NA	NA	NA	NA	1.48087	0.0049992	0.0185717	Up	NA	NA	NA	NA	NA	NA	NA	NA	NA	NA	NA	NA	NA	NA	NA	NA	NA	NA	NA	NA
chr11	46515157	46534363	-	3	101,81,87	AMBRA1	hsa_circ_0007061	19206	269	1	Cancer_specific	Exclusively_altered_in_GBM	NA	NA	NA	NA	-1.37009	8.61128e-05	0.000726148	Down	NA	NA	NA	NA	NA	NA	NA	NA	0.764601	0.21178	0.438927	None	NA	NA	NA	NA	0.158901	0.689781	0.81592	None
chr11	49597597	49598458	+	1	861	RP11-707M1.1	hsa_circ_0095967	861	861	1	Cancer_specific	Exclusively_altered_in_GBM	NA	NA	NA	NA	-1.22391	0.00537468	0.0195494	Down	NA	NA	NA	NA	NA	NA	NA	NA	NA	NA	NA	NA	NA	NA	NA	NA	NA	NA	NA	NA
chr11	58317258	58318705	-	3	82,174,168	LPXN	hsa_circ_0002904	1447	424	1	Cancer_specific	Exclusively_altered_in_GBM	NA	NA	NA	NA	-1.67461	2.47809e-09	3.17847e-07	Down	NA	NA	NA	NA	NA	NA	NA	NA	-1.78004	0.109811	0.307701	None	NA	NA	NA	NA	NA	NA	NA	NA
chr11	63472322	63488504	+	2	57,2331	RTN3	hsa_circ_0096079	16182	2388	1	Cancer_specific	Exclusively_altered_in_GBM	NA	NA	NA	NA	-2.06536	0.000178363	0.00127844	Down	NA	NA	NA	NA	NA	NA	NA	NA	NA	NA	NA	NA	NA	NA	NA	NA	NA	NA	NA	NA
chr11	83673927	83691685	-	3	139,145,137	DLG2	hsa_circ_0096596	17758	421	1	Cancer_specific	Exclusively_altered_in_GBM	NA	NA	NA	NA	-1.12745	0.00301387	0.012569	Down	NA	NA	NA	NA	NA	NA	NA	NA	NA	NA	NA	NA	NA	NA	NA	NA	NA	NA	NA	NA
chr11	107916996	107948967	+	9	100,177,142,146,81,94,131,108,65	CUL5	hsa_circ_0024172	31971	1044	1	Cancer_specific	Exclusively_altered_in_GBM	NA	NA	NA	NA	-1.47702	0.0137091	0.0407429	Down	NA	NA	NA	NA	NA	NA	NA	NA	NA	NA	NA	NA	NA	NA	NA	NA	NA	NA	NA	NA
chr11	112070421	112088612	+	7	129,161,168,138,183,111,129	BCO2	hsa_circ_0094996	18191	1019	1	Cancer_specific	Exclusively_altered_in_HCC	NA	NA	NA	NA	-0.421547	0.259851	0.397524	None	NA	NA	NA	NA	NA	NA	NA	NA	NA	NA	NA	NA	-2.56424	2.2215e-06	9.15086e-05	Down	NA	NA	NA	NA
chr11	116734383	116744352	-	4	151,144,71,156	SIK3	hsa_circ_0000357	9969	522	1	Cancer_specific	Exclusively_altered_in_GBM	NA	NA	NA	NA	1.13445	0.00298329	0.012535	Up	NA	NA	NA	NA	NA	NA	NA	NA	NA	NA	NA	NA	NA	NA	NA	NA	NA	NA	NA	NA
chr11	118422500	118430579	-	7	67,122,129,94,75,140,80	IFT46	hsa_circ_0007372	8079	707	1	Cancer_specific	Exclusively_altered_in_GC	NA	NA	NA	NA	0.73103	0.0595341	0.129888	None	NA	NA	NA	NA	NA	NA	NA	NA	-2.86612	0.00277579	0.042579	Down	NA	NA	NA	NA	NA	NA	NA	NA
chr11	128963515	129034322	-	4	87,85,92,109	ARHGAP32	hsa_circ_0024843	70807	373	1	Cancer_specific	Exclusively_altered_in_GBM	NA	NA	NA	NA	-1.15135	0.000103503	0.000827005	Down	NA	NA	NA	NA	NA	NA	NA	NA	NA	NA	NA	NA	NA	NA	NA	NA	NA	NA	NA	NA
chr10	225933	295028	+	13	135,160,162,78,93,88,56,78,119,208,69,273,186	ZMYND11	hsa_circ_0093332	69095	1705	2	circRNA_altered_in_2_cancer_types	Consistently_altered	NA	NA	NA	NA	-1.68779	5.23228e-06	8.1217e-05	Down	NA	NA	NA	NA	-1.15081	0.00218843	0.0252113	Down	NA	NA	NA	NA	0.178659	0.750404	0.860473	None	NA	NA	NA	NA
chr10	518378	532470	-	2	111,72	DIP2C	hsa_circ_0008655	14092	183	1	Cancer_specific	Exclusively_altered_in_GC	NA	NA	NA	NA	-0.782741	0.0306769	0.0757442	None	NA	NA	NA	NA	NA	NA	NA	NA	-2.17758	0.000679195	0.0181345	Down	NA	NA	NA	NA	NA	NA	NA	NA
chr10	7840952	7844817	+	5	205,144,65,156,97	ATP5C1	hsa_circ_0017673	3865	667	1	Cancer_specific	Exclusively_altered_in_GBM	NA	NA	NA	NA	-1.36108	0.00422361	0.0162863	Down	NA	NA	NA	NA	NA	NA	NA	NA	NA	NA	NA	NA	NA	NA	NA	NA	NA	NA	NA	NA
chr10	15838098	15889942	-	9	73,81,71,80,74,115,174,61,80	FAM188A	hsa_circ_0017848	51844	809	1	Cancer_specific	Exclusively_altered_in_GBM	NA	NA	NA	NA	-1.33285	7.13682e-05	0.000612413	Down	NA	NA	NA	NA	NA	NA	NA	NA	NA	NA	NA	NA	NA	NA	NA	NA	NA	NA	NA	NA
chr10	15875628	15885271	-	5	80,74,115,174,61	FAM188A	hsa_circ_0005825	9643	504	1	Cancer_specific	Exclusively_altered_in_THCA	NA	NA	NA	NA	-0.496661	0.196413	0.324954	None	NA	NA	NA	NA	-1.26974	0.00260266	0.0288152	Down	NA	NA	NA	NA	NA	NA	NA	NA	NA	NA	NA	NA
chr10	18816516	18825125	+	3	110,152,96	CACNB2	hsa_circ_0093260	8609	358	2	circRNA_altered_in_2_cancer_types	Consistently_altered	NA	NA	NA	NA	-0.4645	0.173111	0.294808	None	NA	NA	NA	NA	NA	NA	NA	NA	-2.96851	0.00042575	0.0134869	Down	NA	NA	NA	NA	-2.75684	2.25851e-07	4.14284e-06	Down
chr10	22193450	22209892	-	4	91,94,98,166	DNAJC1	hsa_circ_0004306	16442	449	1	Cancer_specific	Exclusively_altered_in_GBM	NA	NA	NA	NA	-1.47226	5.94212e-06	8.93885e-05	Down	NA	NA	NA	NA	NA	NA	NA	NA	0.679576	0.204422	0.431224	None	NA	NA	NA	NA	NA	NA	NA	NA
chr10	62021616	62039397	-	6	99,186,99,99,99,102	ANK3	hsa_circ_0018440	17781	684	1	Cancer_specific	Exclusively_altered_in_THCA	NA	NA	NA	NA	-0.913716	0.0320793	0.0787283	None	NA	NA	NA	NA	-1.052	0.000869759	0.0123592	Down	NA	NA	NA	NA	NA	NA	NA	NA	NA	NA	NA	NA
chr10	69726439	69804320	-	13	120,173,190,112,60,125,77,161,131,92,222,77,160	HERC4	hsa_circ_0093910	77881	1700	1	Cancer_specific	Exclusively_altered_in_GBM	NA	NA	NA	NA	-1.98635	2.93941e-05	0.000304823	Down	NA	NA	NA	NA	NA	NA	NA	NA	NA	NA	NA	NA	NA	NA	NA	NA	NA	NA	NA	NA
chr10	72604229	72619256	+	5	166,68,148,77,129	SGPL1	hsa_circ_0004977	15027	588	2	circRNA_altered_in_2_cancer_types	Consistently_altered	NA	NA	NA	NA	-1.28263	1.6813e-05	0.000201839	Down	NA	NA	NA	NA	0.262208	0.35567	0.649167	None	-1.97858	0.00309547	0.0455355	Down	NA	NA	NA	NA	-0.833459	0.0481229	0.115064	None
chr10	74906033	74923708	-	8	86,129,129,193,179,88,118,218	ECD	hsa_circ_0007995	17675	1140	1	Cancer_specific	Exclusively_altered_in_GBM	NA	NA	NA	NA	-1.00384	0.00401702	0.0155884	Down	NA	NA	NA	NA	NA	NA	NA	NA	NA	NA	NA	NA	NA	NA	NA	NA	NA	NA	NA	NA
chr10	76602357	76603236	+	1	879	KAT6B	hsa_circ_0005235	879	879	1	Cancer_specific	Exclusively_altered_in_GBM	NA	NA	NA	NA	-1.43657	1.01582e-06	2.40777e-05	Down	NA	NA	NA	NA	NA	NA	NA	NA	NA	NA	NA	NA	NA	NA	NA	NA	NA	NA	NA	NA
chr10	78704530	78729825	-	4	193,225,124,94	KCNMA1	hsa_circ_0006561	25295	636	2	circRNA_altered_in_2_cancer_types	Consistently_altered	NA	NA	NA	NA	-1.00995	0.00586745	0.0209049	Down	NA	NA	NA	NA	NA	NA	NA	NA	-1.80815	0.0204808	0.124686	None	NA	NA	NA	NA	-3.05327	6.47049e-08	1.43311e-06	Down
chr10	90661412	90682193	+	9	83,218,76,96,358,125,138,113,100	STAMBPL1	hsa_circ_0019061	20781	1307	1	Cancer_specific	Exclusively_altered_in_GBM	NA	NA	NA	NA	-1.27261	0.000901945	0.00477835	Down	NA	NA	NA	NA	NA	NA	NA	NA	NA	NA	NA	NA	NA	NA	NA	NA	NA	NA	NA	NA
chr10	96005702	96006378	+	1	676	PLCE1	hsa_circ_0019225	676	676	2	circRNA_altered_in_2_cancer_types	Inconsistently_altered	NA	NA	NA	NA	2.02131	6.34253e-06	9.36772e-05	Up	-1.12528	0.000381402	0.00396891	Down	0.789332	0.0341942	0.17667	None	-0.0901191	0.843246	0.925619	None	NA	NA	NA	NA	-0.0192028	0.946551	0.971616	None
chr10	103552595	103573363	-	10	105,86,175,614,285,99,172,131,98,52	MGEA5	hsa_circ_0092433	20768	1817	1	Cancer_specific	Exclusively_altered_in_GBM	NA	NA	NA	NA	-1.16219	0.00856145	0.0281189	Down	NA	NA	NA	NA	0.275922	0.305234	0.604067	None	-0.96742	0.182318	0.407598	None	NA	NA	NA	NA	NA	NA	NA	NA
chr10	116879948	116931050	+	7	84,114,129,209,175,88,256	ATRNL1	hsa_circ_0092763	51102	1055	1	Cancer_specific	Exclusively_altered_in_GBM	NA	NA	NA	NA	-1.34535	1.78638e-05	0.000212362	Down	NA	NA	NA	NA	NA	NA	NA	NA	NA	NA	NA	NA	NA	NA	NA	NA	NA	NA	NA	NA
chr10	116879948	116975638	+	8	84,114,129,209,175,88,256,184	ATRNL1	hsa_circ_0092765	95690	1239	1	Cancer_specific	Exclusively_altered_in_GBM	NA	NA	NA	NA	-1.90028	6.70839e-08	3.71553e-06	Down	NA	NA	NA	NA	NA	NA	NA	NA	NA	NA	NA	NA	NA	NA	NA	NA	NA	NA	NA	NA
chr10	122273422	122280607	+	3	91,64,125	PPAPDC1A	hsa_circ_0008896	7185	280	1	Cancer_specific	Exclusively_altered_in_GBM	NA	NA	NA	NA	1.48776	0.00339786	0.0136194	Up	NA	NA	NA	NA	NA	NA	NA	NA	NA	NA	NA	NA	NA	NA	NA	NA	NA	NA	NA	NA
chr10	123549683	123683844	-	10	121,100,182,33,129,230,246,104,63,64	ATE1	hsa_circ_0007062	134161	1272	1	Cancer_specific	Exclusively_altered_in_GBM	NA	NA	NA	NA	-1.06572	0.00447165	0.0171032	Down	NA	NA	NA	NA	NA	NA	NA	NA	NA	NA	NA	NA	NA	NA	NA	NA	NA	NA	NA	NA
chr10	123596232	123683844	-	9	100,182,33,129,230,246,104,63,64	ATE1	hsa_circ_0092994	87612	1151	1	Cancer_specific	Exclusively_altered_in_GBM	NA	NA	NA	NA	-1.34724	0.0021601	0.0098029	Down	NA	NA	NA	NA	NA	NA	NA	NA	NA	NA	NA	NA	NA	NA	NA	NA	NA	NA	NA	NA
chr10	133106473	133107562	-	2	181,147	TCERG1L	hsa_circ_0093116	1089	328	2	circRNA_altered_in_2_cancer_types	Inconsistently_altered	NA	NA	NA	NA	-2.18387	2.50729e-05	0.000267994	Down	NA	NA	NA	NA	3.89082	5.33602e-07	3.49919e-05	Up	NA	NA	NA	NA	NA	NA	NA	NA	NA	NA	NA	NA
chr17	8141348	8141947	-	2	212,238	CTC1	hsa_circ_0008041	599	450	1	Cancer_specific	Exclusively_altered_in_CRC	NA	NA	NA	NA	-0.776468	0.000686412	0.00382789	None	0.0868477	0.811082	0.897334	None	NA	NA	NA	NA	-0.570657	0.226415	0.45748	None	NA	NA	NA	NA	-1.2609	0.00142454	0.00691998	Down
chr17	9843442	9850300	-	3	75,116,90	GAS7	hsa_circ_0042079	6858	281	1	Cancer_specific	Exclusively_altered_in_GBM	NA	NA	NA	NA	-1.91057	1.01765e-06	2.40777e-05	Down	NA	NA	NA	NA	NA	NA	NA	NA	NA	NA	NA	NA	NA	NA	NA	NA	NA	NA	NA	NA
chr17	11958205	12032604	+	8	103,175,120,120,52,128,78,149	MAP2K4	hsa_circ_0042094	74399	925	1	Cancer_specific	Exclusively_altered_in_GBM	NA	NA	NA	NA	-1.15397	0.000377694	0.00240324	Down	NA	NA	NA	NA	NA	NA	NA	NA	NA	NA	NA	NA	NA	NA	NA	NA	NA	NA	NA	NA
chr17	15905228	15909882	+	5	111,39,57,62,95	TTC19	hsa_circ_0106234	4654	364	1	Cancer_specific	Exclusively_altered_in_GBM	NA	NA	NA	NA	-1.96241	2.13861e-06	4.00908e-05	Down	NA	NA	NA	NA	NA	NA	NA	NA	NA	NA	NA	NA	NA	NA	NA	NA	NA	NA	NA	NA
chr17	20107645	20135718	+	4	1580,208,74,206	SPECC1	hsa_circ_0042426	28073	2068	1	Cancer_specific	Exclusively_altered_in_GBM	NA	NA	NA	NA	1.08401	0.000562889	0.00324167	Up	NA	NA	NA	NA	NA	NA	NA	NA	NA	NA	NA	NA	NA	NA	NA	NA	NA	NA	NA	NA
chr17	26449628	26499644	+	6	130,56,107,86,210,102	NLK	hsa_circ_0002103	50016	691	1	Cancer_specific	Exclusively_altered_in_GBM	NA	NA	NA	NA	-1.13276	1.80082e-07	6.96603e-06	Down	0.117751	0.674062	0.830854	None	-0.246557	0.309512	0.606222	None	0.586096	0.201432	0.427813	None	-0.214132	0.52396	0.702304	None	-0.0835176	0.769812	0.867981	None
chr17	26459645	26499644	+	5	56,107,86,210,102	NLK	hsa_circ_0106439	39999	561	1	Cancer_specific	Exclusively_altered_in_GBM	NA	NA	NA	NA	-1.47841	0.000403772	0.00253607	Down	NA	NA	NA	NA	NA	NA	NA	NA	NA	NA	NA	NA	NA	NA	NA	NA	NA	NA	NA	NA
chr17	49340634	49365564	+	10	113,99,68,89,126,175,101,91,124,175	UTP18	hsa_circ_0107086	24930	1161	1	Cancer_specific	Exclusively_altered_in_GBM	NA	NA	NA	NA	-1.0145	0.0120438	0.0367549	Down	NA	NA	NA	NA	NA	NA	NA	NA	NA	NA	NA	NA	NA	NA	NA	NA	NA	NA	NA	NA
chr17	60106901	60112969	-	5	111,163,195,198,146	MED13	hsa_circ_0045096	6068	813	1	Cancer_specific	Exclusively_altered_in_THCA	NA	NA	NA	NA	0.322708	0.36761	0.510174	None	-0.307353	0.37	0.602845	None	1.22901	0.000524258	0.0085948	Up	-0.0626744	0.909431	0.958091	None	0.442473	0.280852	0.499656	None	NA	NA	NA	NA
chr17	61271351	61278318	+	2	149,187	TANC2	hsa_circ_0004006	6967	336	1	Cancer_specific	Exclusively_altered_in_GBM	NA	NA	NA	NA	1.24852	0.00293268	0.0123864	Up	NA	NA	NA	NA	NA	NA	NA	NA	NA	NA	NA	NA	NA	NA	NA	NA	NA	NA	NA	NA
chr16	2367283	2369841	-	3	121,117,260	ABCA3	hsa_circ_0105245	2558	498	1	Cancer_specific	Exclusively_altered_in_GBM	NA	NA	NA	NA	-1.03715	0.00604136	0.0214306	Down	NA	NA	NA	NA	NA	NA	NA	NA	NA	NA	NA	NA	NA	NA	NA	NA	NA	NA	NA	NA
chr16	7629778	7657340	+	5	144,54,93,61,54	RBFOX1	hsa_circ_0105987	27562	406	1	Cancer_specific	Exclusively_altered_in_GBM	NA	NA	NA	NA	-1.43694	0.00173012	0.00829979	Down	NA	NA	NA	NA	NA	NA	NA	NA	NA	NA	NA	NA	NA	NA	NA	NA	NA	NA	NA	NA
chr16	19741751	19746772	+	3	65,130,98	IQCK	hsa_circ_0038375	5021	293	1	Cancer_specific	Exclusively_altered_in_THCA	NA	NA	NA	NA	-0.247211	0.429014	0.572804	None	NA	NA	NA	NA	1.47848	0.00190026	0.0228165	Up	NA	NA	NA	NA	NA	NA	NA	NA	NA	NA	NA	NA
chr16	22142525	22143050	+	2	75,145	VWA3A	hsa_circ_0038484	525	220	1	Cancer_specific	Exclusively_altered_in_LUAD	NA	NA	NA	NA	1.30661	0.019041	0.0524919	None	-1.67063	5.39563e-05	0.00076483	Down	NA	NA	NA	NA	NA	NA	NA	NA	NA	NA	NA	NA	NA	NA	NA	NA
chr16	23999828	24046868	+	3	83,112,129	PRKCB	hsa_circ_0000681	47040	324	1	Cancer_specific	Exclusively_altered_in_GBM	NA	NA	NA	NA	-1.75283	9.10278e-05	0.000757115	Down	NA	NA	NA	NA	NA	NA	NA	NA	-1.75599	0.0123827	0.0962074	None	NA	NA	NA	NA	NA	NA	NA	NA
chr16	24043456	24046868	+	2	112,129	PRKCB	hsa_circ_0000682	3412	241	1	Cancer_specific	Exclusively_altered_in_GBM	NA	NA	NA	NA	-2.33526	4.99055e-06	7.79613e-05	Down	NA	NA	NA	NA	NA	NA	NA	NA	NA	NA	NA	NA	NA	NA	NA	NA	NA	NA	NA	NA
chr16	29917108	29917448	+	2	172,49	ASPHD1	hsa_circ_0105346	340	221	1	Cancer_specific	Exclusively_altered_in_GBM	NA	NA	NA	NA	-1.61271	7.66436e-06	0.000107966	Down	NA	NA	NA	NA	NA	NA	NA	NA	NA	NA	NA	NA	NA	NA	NA	NA	NA	NA	NA	NA
chr16	47531309	47630442	+	12	90,139,100,108,81,116,64,96,198,58,78,159	PHKB	hsa_circ_0039264	99133	1287	2	circRNA_altered_in_2_cancer_types	Consistently_altered	NA	NA	NA	NA	-0.242654	0.310691	0.454201	None	0.00979739	0.975817	0.992445	None	-0.51215	0.099915	0.346627	None	-2.11876	0.000663714	0.0181345	Down	NA	NA	NA	NA	-1.19842	0.00271759	0.0113603	Down
chr16	48290520	48311390	+	6	132,123,164,95,259,142	LONP2	hsa_circ_0105461	20870	915	1	Cancer_specific	Exclusively_altered_in_GBM	NA	NA	NA	NA	-1.02372	1.90504e-05	0.000222133	Down	-0.700993	0.0625776	0.184319	None	-0.328906	0.233639	0.533216	None	-0.477415	0.318224	0.55846	None	-0.54736	0.147812	0.338987	None	-0.986697	0.000823103	0.00436032	None
chr16	48290520	48337216	+	9	132,123,164,95,259,142,151,127,134	LONP2	hsa_circ_0105462	46696	1327	1	Cancer_specific	Exclusively_altered_in_GBM	NA	NA	NA	NA	-1.2788	0.00015566	0.00114302	Down	NA	NA	NA	NA	0.0794389	0.79286	0.917531	None	NA	NA	NA	NA	NA	NA	NA	NA	NA	NA	NA	NA
chr16	56385295	56388993	+	2	154,216	GNAO1	hsa_circ_0105619	3698	370	1	Cancer_specific	Exclusively_altered_in_GBM	NA	NA	NA	NA	-1.0106	0.00163349	0.00792991	Down	NA	NA	NA	NA	NA	NA	NA	NA	NA	NA	NA	NA	NA	NA	NA	NA	NA	NA	NA	NA
chr16	68893786	68896964	+	2	641,117	TANGO6	hsa_circ_0003220	3178	758	1	Cancer_specific	Exclusively_altered_in_GBM	NA	NA	NA	NA	1.46778	0.00174166	0.00833877	Up	NA	NA	NA	NA	NA	NA	NA	NA	-0.502128	0.44458	0.657895	None	NA	NA	NA	NA	NA	NA	NA	NA
chr16	69189773	69201088	+	6	123,157,107,96,186,111	CIRH1A	hsa_circ_0007018	11315	780	1	Cancer_specific	Exclusively_altered_in_GBM	NA	NA	NA	NA	1.10415	0.000550841	0.00319619	Up	NA	NA	NA	NA	NA	NA	NA	NA	NA	NA	NA	NA	NA	NA	NA	NA	NA	NA	NA	NA
chr16	70292882	70296427	-	3	207,114,179	AARS	hsa_circ_0040188	3545	500	1	Cancer_specific	Exclusively_altered_in_GBM	NA	NA	NA	NA	1.48402	0.00150969	0.00738778	Up	NA	NA	NA	NA	NA	NA	NA	NA	NA	NA	NA	NA	0.595461	0.102749	0.271045	None	NA	NA	NA	NA
chr15	25599499	25657118	-	10	74,156,165,206,145,1247,299,42,120,64	UBE3A	hsa_circ_0103211	57619	2518	1	Cancer_specific	Exclusively_altered_in_GC	NA	NA	NA	NA	0.157491	0.67112	0.772968	None	NA	NA	NA	NA	-0.309244	0.264462	0.560694	None	-2.30703	0.00336074	0.0483171	Down	NA	NA	NA	NA	NA	NA	NA	NA
chr15	27571955	27574035	+	2	221,83	GABRG3	hsa_circ_0034186	2080	304	1	Cancer_specific	Exclusively_altered_in_GBM	NA	NA	NA	NA	-1.48555	0.0176646	0.0494811	Down	NA	NA	NA	NA	NA	NA	NA	NA	NA	NA	NA	NA	NA	NA	NA	NA	NA	NA	NA	NA
chr15	30053341	30092905	-	7	148,169,104,277,103,125,57	TJP1	hsa_circ_0034294	39564	983	1	Cancer_specific	Exclusively_altered_in_LUAD	NA	NA	NA	NA	-0.301997	0.36491	0.507591	None	-1.48617	0.00565579	0.0349797	Down	0.208323	0.606505	0.815947	None	-1.92952	0.00870926	0.081388	None	NA	NA	NA	NA	NA	NA	NA	NA
chr15	33149215	33194241	-	5	93,121,60,147,130	FMN1	hsa_circ_0005054	45026	551	1	Cancer_specific	Exclusively_altered_in_GBM	NA	NA	NA	NA	-2.72002	3.44442e-14	4.19703e-11	Down	NA	NA	NA	NA	NA	NA	NA	NA	NA	NA	NA	NA	NA	NA	NA	NA	NA	NA	NA	NA
chr15	33149215	33202736	-	7	93,121,60,147,130,89,62	FMN1	hsa_circ_0103282	53521	702	1	Cancer_specific	Exclusively_altered_in_GBM	NA	NA	NA	NA	-2.87045	2.13427e-08	1.67781e-06	Down	NA	NA	NA	NA	NA	NA	NA	NA	NA	NA	NA	NA	NA	NA	NA	NA	NA	NA	NA	NA
chr15	33180372	33194241	-	4	121,60,147,130	FMN1	hsa_circ_0008589	13869	458	1	Cancer_specific	Exclusively_altered_in_GBM	NA	NA	NA	NA	-1.84764	7.13686e-05	0.000612413	Down	NA	NA	NA	NA	NA	NA	NA	NA	NA	NA	NA	NA	NA	NA	NA	NA	NA	NA	NA	NA
chr15	33180372	33202736	-	6	121,60,147,130,89,62	FMN1	hsa_circ_0006828	22364	609	1	Cancer_specific	Exclusively_altered_in_GBM	NA	NA	NA	NA	-1.85483	4.64701e-05	0.000440652	Down	NA	NA	NA	NA	NA	NA	NA	NA	NA	NA	NA	NA	NA	NA	NA	NA	NA	NA	NA	NA
chr15	33445248	33447246	-	1	1998	FMN1	hsa_circ_0103284	1998	1998	1	Cancer_specific	Exclusively_altered_in_GBM	NA	NA	NA	NA	-2.79865	8.94258e-08	4.63682e-06	Down	NA	NA	NA	NA	NA	NA	NA	NA	NA	NA	NA	NA	NA	NA	NA	NA	NA	NA	NA	NA
chr15	38794512	38798121	-	3	110,105,81	RASGRP1	hsa_circ_0034414	3609	296	1	Cancer_specific	Exclusively_altered_in_GBM	NA	NA	NA	NA	-1.12451	0.00144641	0.007121	Down	NA	NA	NA	NA	NA	NA	NA	NA	NA	NA	NA	NA	NA	NA	NA	NA	NA	NA	NA	NA
chr15	40005644	40034101	-	5	138,159,111,125,96	FSIP1	hsa_circ_0103403	28457	629	1	Cancer_specific	Exclusively_altered_in_GBM	NA	NA	NA	NA	-1.15054	0.000374204	0.00238727	Down	NA	NA	NA	NA	NA	NA	NA	NA	NA	NA	NA	NA	NA	NA	NA	NA	NA	NA	NA	NA
chr15	43438690	43461875	+	7	142,125,123,156,160,114,85	TMEM62	hsa_circ_0034940	23185	905	1	Cancer_specific	Exclusively_altered_in_GBM	NA	NA	NA	NA	-1.26501	0.00316702	0.0130152	Down	NA	NA	NA	NA	NA	NA	NA	NA	NA	NA	NA	NA	NA	NA	NA	NA	NA	NA	NA	NA
chr15	50330964	50399205	-	5	62,99,114,59,70	ATP8B4	hsa_circ_0035199	68241	404	1	Cancer_specific	Exclusively_altered_in_GBM	NA	NA	NA	NA	-1.22352	0.00974162	0.0311456	Down	NA	NA	NA	NA	NA	NA	NA	NA	NA	NA	NA	NA	NA	NA	NA	NA	NA	NA	NA	NA
chr15	52697483	52725482	-	8	107,108,82,144,157,145,172,111	MYO5A	hsa_circ_0035338	27999	1026	1	Cancer_specific	Exclusively_altered_in_GBM	NA	NA	NA	NA	-1.1745	0.00386745	0.0150799	Down	NA	NA	NA	NA	NA	NA	NA	NA	NA	NA	NA	NA	NA	NA	NA	NA	NA	NA	NA	NA
chr15	54586092	54630687	+	7	170,116,164,157,69,90,129	UNC13C	hsa_circ_0103908	44595	895	1	Cancer_specific	Exclusively_altered_in_GBM	NA	NA	NA	NA	-2.04323	7.08301e-06	0.000102746	Down	NA	NA	NA	NA	NA	NA	NA	NA	NA	NA	NA	NA	NA	NA	NA	NA	NA	NA	NA	NA
chr15	57523349	57526305	+	4	106,140,145,65	TCF12	hsa_circ_0006380	2956	456	1	Cancer_specific	Exclusively_altered_in_GBM	NA	NA	NA	NA	1.02198	0.0054341	0.0196482	Up	NA	NA	NA	NA	NA	NA	NA	NA	-0.508717	0.404191	0.623294	None	NA	NA	NA	NA	NA	NA	NA	NA
chr15	62221699	62223458	-	2	248,170	VPS13C	hsa_circ_0004456	1759	418	1	Cancer_specific	Exclusively_altered_in_GBM	NA	NA	NA	NA	-1.14982	0.000619293	0.00351799	Down	NA	NA	NA	NA	NA	NA	NA	NA	NA	NA	NA	NA	NA	NA	NA	NA	NA	NA	NA	NA
chr15	62312677	62336454	-	6	60,110,102,96,43,44	VPS13C	hsa_circ_0000608	23777	455	1	Cancer_specific	Exclusively_altered_in_HCC	NA	NA	NA	NA	0.464253	0.133159	0.24181	None	0.312199	0.437602	0.667887	None	-0.213396	0.634797	0.826353	None	0.269979	0.673529	0.842587	None	1.22488	0.00791383	0.0465699	Up	NA	NA	NA	NA
chr15	69502654	69553668	+	3	91,599,243	GLCE	hsa_circ_0104368	51014	933	2	circRNA_altered_in_2_cancer_types	Consistently_altered	NA	NA	NA	NA	-0.132385	0.725705	0.810878	None	-0.104479	0.774566	0.883659	None	NA	NA	NA	NA	1.09777	0.0844794	0.263153	None	1.33001	0.000109801	0.00183746	Up	1.48059	0.000109311	0.000769979	Up
chr15	83819966	83826793	-	3	147,159,139	HDGFRP3	hsa_circ_0104714	6827	445	1	Cancer_specific	Exclusively_altered_in_GBM	NA	NA	NA	NA	-1.0938	0.0032626	0.0132516	Down	NA	NA	NA	NA	NA	NA	NA	NA	NA	NA	NA	NA	NA	NA	NA	NA	NA	NA	NA	NA
chr15	84228004	84245493	+	5	69,73,144,134,159	SH3GL3	hsa_circ_0104726	17489	579	1	Cancer_specific	Exclusively_altered_in_GBM	NA	NA	NA	NA	-2.56551	6.16969e-08	3.57989e-06	Down	NA	NA	NA	NA	NA	NA	NA	NA	NA	NA	NA	NA	NA	NA	NA	NA	NA	NA	NA	NA
chr15	84228004	84257523	+	7	69,73,144,134,159,104,110	SH3GL3	hsa_circ_0104727	29519	793	1	Cancer_specific	Exclusively_altered_in_GBM	NA	NA	NA	NA	-1.99069	2.26338e-09	3.06437e-07	Down	NA	NA	NA	NA	NA	NA	NA	NA	NA	NA	NA	NA	NA	NA	NA	NA	NA	NA	NA	NA
chr15	85610244	85626875	+	4	191,57,55,89	PDE8A	hsa_circ_0104785	16631	392	1	Cancer_specific	Exclusively_altered_in_HCC	NA	NA	NA	NA	-0.614962	0.101274	0.196033	None	NA	NA	NA	NA	NA	NA	NA	NA	-0.987544	0.0743957	0.24523	None	-1.13605	0.0050927	0.0336684	Down	NA	NA	NA	NA
chr15	88472421	88483984	-	3	244,173,131	NTRK3	hsa_circ_0036657	11563	548	1	Cancer_specific	Exclusively_altered_in_GBM	NA	NA	NA	NA	-1.14024	6.13527e-05	0.000541726	Down	NA	NA	NA	NA	NA	NA	NA	NA	NA	NA	NA	NA	NA	NA	NA	NA	NA	NA	NA	NA
chr15	89656955	89698765	+	4	100,200,176,168	ABHD2	hsa_circ_0036683	41810	644	1	Cancer_specific	Exclusively_altered_in_HCC	NA	NA	NA	NA	-0.581697	0.0207833	0.0565909	None	NA	NA	NA	NA	NA	NA	NA	NA	0.11749	0.861085	0.932132	None	-1.50209	2.86567e-05	0.000730746	Down	0.518273	0.433281	0.59899	None
chr15	91795048	91811835	+	7	181,152,134,90,111,89,165	SV2B	hsa_circ_0104891	16787	922	1	Cancer_specific	Exclusively_altered_in_GBM	NA	NA	NA	NA	-2.02881	3.85736e-07	1.18992e-05	Down	NA	NA	NA	NA	NA	NA	NA	NA	NA	NA	NA	NA	NA	NA	NA	NA	NA	NA	NA	NA
chr15	102241288	102255166	-	7	99,147,79,65,118,122,124	TARSL2	hsa_circ_0037108	13878	754	1	Cancer_specific	Exclusively_altered_in_GBM	NA	NA	NA	NA	-1.14332	2.78006e-05	0.00028953	Down	NA	NA	NA	NA	-0.87485	0.0852349	0.318155	None	NA	NA	NA	NA	NA	NA	NA	NA	NA	NA	NA	NA
chr14	57051718	57103316	+	13	32,152,178,114,180,41,84,115,170,149,177,54,91	TMEM260	hsa_circ_0032040	51598	1537	1	Cancer_specific	Exclusively_altered_in_GBM	NA	NA	NA	NA	-1.97275	4.84062e-05	0.000457232	Down	NA	NA	NA	NA	NA	NA	NA	NA	NA	NA	NA	NA	NA	NA	NA	NA	NA	NA	NA	NA
chr14	61275042	61346553	+	4	104,141,126,122	MNAT1	hsa_circ_0004244	71511	493	1	Cancer_specific	Exclusively_altered_in_GBM	NA	NA	NA	NA	-1.51484	4.54981e-05	0.0004375	Down	NA	NA	NA	NA	NA	NA	NA	NA	NA	NA	NA	NA	NA	NA	NA	NA	NA	NA	NA	NA
chr14	61278704	61346553	+	3	141,126,122	MNAT1	hsa_circ_0008215	67849	389	1	Cancer_specific	Exclusively_altered_in_GBM	NA	NA	NA	NA	-1.38652	1.66374e-06	3.27138e-05	Down	NA	NA	NA	NA	NA	NA	NA	NA	NA	NA	NA	NA	NA	NA	NA	NA	NA	NA	NA	NA
chr14	61503776	61518853	+	9	83,59,66,54,80,101,125,145,95	SLC38A6	hsa_circ_0102304	15077	808	1	Cancer_specific	Exclusively_altered_in_GBM	NA	NA	NA	NA	-1.00837	0.017583	0.0493542	Down	NA	NA	NA	NA	NA	NA	NA	NA	NA	NA	NA	NA	NA	NA	NA	NA	NA	NA	NA	NA
chr14	63447589	63483672	-	5	393,116,129,107,124	KCNH5	hsa_circ_0032148	36083	869	1	Cancer_specific	Exclusively_altered_in_GBM	NA	NA	NA	NA	-1.58942	0.000959365	0.00503873	Down	NA	NA	NA	NA	NA	NA	NA	NA	NA	NA	NA	NA	NA	NA	NA	NA	NA	NA	NA	NA
chr14	68228082	68229536	-	3	219,210,148	ZFYVE26	hsa_circ_0000545	1454	577	1	Cancer_specific	Exclusively_altered_in_CRC	NA	NA	NA	NA	0.0598703	0.852672	0.89722	None	-0.257683	0.391932	0.62161	None	-0.0657	0.840705	0.933812	None	-0.193891	0.67556	0.843999	None	0.0075442	0.985326	0.997433	None	-1.05126	0.00260397	0.0109975	Down
chr14	70633355	70635201	-	1	1846	SLC8A3	hsa_circ_0000551	1846	1846	1	Cancer_specific	Exclusively_altered_in_GBM	NA	NA	NA	NA	-1.06709	0.00994097	0.0315445	Down	NA	NA	NA	NA	NA	NA	NA	NA	NA	NA	NA	NA	NA	NA	NA	NA	NA	NA	NA	NA
chr14	93760203	93761283	-	1	1080	BTBD7	hsa_circ_0006947	1080	1080	1	Cancer_specific	Exclusively_altered_in_CRC	NA	NA	NA	NA	-0.563692	0.143522	0.256425	None	-0.388557	0.282608	0.499965	None	-0.279072	0.379751	0.659343	None	-0.769228	0.115784	0.318235	None	NA	NA	NA	NA	-1.3059	0.000276512	0.00169916	Down
chr14	93934016	93963632	+	6	121,146,171,93,56,130	UNC79	hsa_circ_0102954	29616	717	1	Cancer_specific	Exclusively_altered_in_GBM	NA	NA	NA	NA	-1.22594	0.000341694	0.00222649	Down	NA	NA	NA	NA	NA	NA	NA	NA	NA	NA	NA	NA	NA	NA	NA	NA	NA	NA	NA	NA
chr18	6213147	6312055	-	11	111,86,77,155,92,136,105,92,55,103,59	L3MBTL4	hsa_circ_0108796	98908	1071	1	Cancer_specific	Exclusively_altered_in_THCA	NA	NA	NA	NA	-0.820795	0.00762781	0.0257465	None	NA	NA	NA	NA	-1.29071	0.000162866	0.00342823	Down	-0.593887	0.327866	0.566314	None	NA	NA	NA	NA	NA	NA	NA	NA
chr18	8076452	8088849	+	3	110,202,103	PTPRM	hsa_circ_0006114	12397	415	3	circRNA_altered_in_3_cancer_types	Inconsistently_altered	NA	NA	NA	NA	-0.589172	0.0246955	0.0649223	None	-1.67172	1.52794e-06	4.02951e-05	Down	1.00543	7.79601e-07	4.58352e-05	Up	-0.926108	0.144022	0.357416	None	NA	NA	NA	NA	-1.63505	0.000147339	0.00097881	Down
chr18	8076452	8143777	+	6	110,202,103,274,37,133	PTPRM	hsa_circ_0007144	67325	859	2	circRNA_altered_in_2_cancer_types	Inconsistently_altered	NA	NA	NA	NA	-1.05981	0.00365189	0.0144475	Down	NA	NA	NA	NA	1.39115	2.39186e-07	1.85369e-05	Up	NA	NA	NA	NA	NA	NA	NA	NA	NA	NA	NA	NA
chr18	20555115	20564953	+	3	67,176,105	RBBP8	hsa_circ_0047133	9838	348	1	Cancer_specific	Exclusively_altered_in_GBM	NA	NA	NA	NA	-2.72886	3.02723e-07	1.01728e-05	Down	NA	NA	NA	NA	NA	NA	NA	NA	NA	NA	NA	NA	NA	NA	NA	NA	NA	NA	NA	NA
chr18	20555115	20581692	+	10	67,176,105,98,113,892,127,89,115,144	RBBP8	hsa_circ_0108057	26577	1926	1	Cancer_specific	Exclusively_altered_in_GBM	NA	NA	NA	NA	-2.1466	0.000213587	0.00148707	Down	NA	NA	NA	NA	NA	NA	NA	NA	NA	NA	NA	NA	NA	NA	NA	NA	NA	NA	NA	NA
chr18	21776088	21819346	-	3	76,157,163	OSBPL1A	hsa_circ_0108091	43258	396	2	circRNA_altered_in_2_cancer_types	Consistently_altered	NA	NA	NA	NA	-1.60862	1.07575e-06	2.44976e-05	Down	NA	NA	NA	NA	NA	NA	NA	NA	-2.10979	0.0164153	0.111972	None	NA	NA	NA	NA	-2.7299	1.49157e-05	0.00013783	Down
chr18	31187557	31263532	+	8	83,3,109,109,122,118,120,164	ASXL3	hsa_circ_0108265	75975	828	1	Cancer_specific	Exclusively_altered_in_THCA	NA	NA	NA	NA	-0.00687154	0.987815	0.991068	None	NA	NA	NA	NA	-2.77037	4.58372e-06	0.000190616	Down	NA	NA	NA	NA	NA	NA	NA	NA	NA	NA	NA	NA
chr18	52937061	52946887	-	3	133,134,106	TCF4	hsa_circ_0108650	9826	373	1	Cancer_specific	Exclusively_altered_in_GBM	NA	NA	NA	NA	1.12631	0.00950177	0.0304517	Up	NA	NA	NA	NA	NA	NA	NA	NA	NA	NA	NA	NA	NA	NA	NA	NA	NA	NA	NA	NA
chr18	54444012	54483375	+	4	99,119,124,114	WDR7	hsa_circ_0108683	39363	456	1	Cancer_specific	Exclusively_altered_in_GBM	NA	NA	NA	NA	-1.95718	5.04022e-05	0.000471942	Down	NA	NA	NA	NA	NA	NA	NA	NA	NA	NA	NA	NA	NA	NA	NA	NA	NA	NA	NA	NA
chr18	76953182	77037196	+	5	81,76,77,161,143	ATP9B	hsa_circ_0048012	84014	538	1	Cancer_specific	Exclusively_altered_in_GBM	NA	NA	NA	NA	-1.67137	9.5199e-07	2.34343e-05	Down	NA	NA	NA	NA	NA	NA	NA	NA	NA	NA	NA	NA	NA	NA	NA	NA	NA	NA	NA	NA
chr18	76953182	77067234	+	7	81,76,77,161,143,113,249	ATP9B	hsa_circ_0048013	114052	900	1	Cancer_specific	Exclusively_altered_in_GBM	NA	NA	NA	NA	-1.98186	1.20786e-06	2.6161e-05	Down	NA	NA	NA	NA	NA	NA	NA	NA	NA	NA	NA	NA	NA	NA	NA	NA	NA	NA	NA	NA
chr6	6366587	6438965	-	3	255,154,157	LY86-AS1	hsa_circ_0075543	72378	566	1	Cancer_specific	Exclusively_altered_in_GBM	NA	NA	NA	NA	-1.60144	0.000898282	0.00476931	Down	NA	NA	NA	NA	NA	NA	NA	NA	NA	NA	NA	NA	NA	NA	NA	NA	NA	NA	NA	NA
chr6	17507399	17514185	+	3	144,86,106	CAP2	hsa_circ_0002245	6786	336	1	Cancer_specific	Exclusively_altered_in_GBM	NA	NA	NA	NA	-1.42964	0.000151808	0.00112108	Down	NA	NA	NA	NA	NA	NA	NA	NA	NA	NA	NA	NA	NA	NA	NA	NA	NA	NA	NA	NA
chr6	24405395	24418806	+	7	74,37,174,131,117,153,118	MRS2	hsa_circ_0075834	13411	804	1	Cancer_specific	Exclusively_altered_in_GBM	NA	NA	NA	NA	-1.11691	0.0036621	0.0144644	Down	NA	NA	NA	NA	NA	NA	NA	NA	NA	NA	NA	NA	NA	NA	NA	NA	NA	NA	NA	NA
chr6	24475348	24480187	-	3	111,98,79	GPLD1	hsa_circ_0075842	4839	288	1	Cancer_specific	Exclusively_altered_in_GBM	NA	NA	NA	NA	-1.24796	0.00541293	0.0196007	Down	NA	NA	NA	NA	NA	NA	NA	NA	NA	NA	NA	NA	NA	NA	NA	NA	NA	NA	NA	NA
chr6	25605039	25606501	+	2	82,213	LRRC16A	hsa_circ_0075881	1462	295	1	Cancer_specific	Exclusively_altered_in_GBM	NA	NA	NA	NA	-1.41451	0.0145168	0.0428298	Down	NA	NA	NA	NA	NA	NA	NA	NA	NA	NA	NA	NA	NA	NA	NA	NA	NA	NA	NA	NA
chr6	38224184	38256237	-	2	108,190	BTBD9	hsa_circ_0076253	32053	298	1	Cancer_specific	Exclusively_altered_in_GBM	NA	NA	NA	NA	-1.62778	0.00277685	0.0118953	Down	NA	NA	NA	NA	NA	NA	NA	NA	NA	NA	NA	NA	NA	NA	NA	NA	NA	NA	NA	NA
chr6	39507778	39581094	-	8	219,139,106,104,87,144,207,130	KIF6	hsa_circ_0131720	73316	1136	1	Cancer_specific	Exclusively_altered_in_GBM	NA	NA	NA	NA	-2.48167	2.05241e-06	3.87731e-05	Down	NA	NA	NA	NA	NA	NA	NA	NA	NA	NA	NA	NA	NA	NA	NA	NA	NA	NA	NA	NA
chr6	44900389	45333038	-	9	111,108,113,76,140,91,87,85,101	SUPT3H	hsa_circ_0003724	432649	912	1	Cancer_specific	Exclusively_altered_in_GBM	NA	NA	NA	NA	-2.21461	8.62452e-07	2.18937e-05	Down	NA	NA	NA	NA	NA	NA	NA	NA	NA	NA	NA	NA	NA	NA	NA	NA	NA	NA	NA	NA
chr6	44971389	45333038	-	5	140,91,87,85,101	SUPT3H	hsa_circ_0005112	361649	504	1	Cancer_specific	Exclusively_altered_in_GBM	NA	NA	NA	NA	-2.3139	2.0147e-05	0.000228364	Down	NA	NA	NA	NA	NA	NA	NA	NA	NA	NA	NA	NA	NA	NA	NA	NA	NA	NA	NA	NA
chr6	54013853	54067031	+	7	72,66,84,60,45,45,129	MLIP	hsa_circ_0131933	53178	501	1	Cancer_specific	Exclusively_altered_in_GBM	NA	NA	NA	NA	-1.91867	1.87823e-05	0.000221123	Down	NA	NA	NA	NA	NA	NA	NA	NA	NA	NA	NA	NA	NA	NA	NA	NA	NA	NA	NA	NA
chr6	54013853	54095715	+	8	72,66,84,60,45,45,129,204	MLIP	hsa_circ_0131934	81862	705	1	Cancer_specific	Exclusively_altered_in_GBM	NA	NA	NA	NA	-2.29259	2.52575e-08	1.92351e-06	Down	NA	NA	NA	NA	NA	NA	NA	NA	NA	NA	NA	NA	NA	NA	NA	NA	NA	NA	NA	NA
chr6	55360216	55406938	-	6	189,64,149,96,108,81	HMGCLL1	hsa_circ_0131944	46722	687	2	circRNA_altered_in_2_cancer_types	Consistently_altered	NA	NA	NA	NA	-1.36596	0.000422424	0.00261946	Down	-1.85753	1.69931e-06	4.3796e-05	Down	NA	NA	NA	NA	NA	NA	NA	NA	NA	NA	NA	NA	NA	NA	NA	NA
chr6	55378845	55406938	-	4	149,96,108,81	HMGCLL1	hsa_circ_0131947	28093	434	2	circRNA_altered_in_2_cancer_types	Consistently_altered	NA	NA	NA	NA	-2.07837	1.75709e-06	3.39843e-05	Down	-1.66127	0.00116862	0.010273	Down	NA	NA	NA	NA	NA	NA	NA	NA	NA	NA	NA	NA	NA	NA	NA	NA
chr6	69723929	69785930	+	6	69,109,150,76,103,44	BAI3	hsa_circ_0076948	62001	551	1	Cancer_specific	Exclusively_altered_in_LUAD	NA	NA	NA	NA	-0.893019	0.000393681	0.00249195	None	-2.24274	5.1501e-05	0.000752756	Down	NA	NA	NA	NA	-2.31765	0.0129738	0.0986655	None	NA	NA	NA	NA	NA	NA	NA	NA
chr6	70447833	70500364	-	6	74,89,68,98,61,177	LMBRD1	hsa_circ_0132149	52531	567	1	Cancer_specific	Exclusively_altered_in_GC	NA	NA	NA	NA	-0.732972	0.0377113	0.0901889	None	NA	NA	NA	NA	NA	NA	NA	NA	-2.73689	0.00268961	0.0418907	Down	NA	NA	NA	NA	NA	NA	NA	NA
chr6	71442080	71483128	+	3	134,86,76	SMAP1	hsa_circ_0132185	41048	296	1	Cancer_specific	Exclusively_altered_in_GBM	NA	NA	NA	NA	-1.28243	0.000415571	0.00258846	Down	NA	NA	NA	NA	NA	NA	NA	NA	NA	NA	NA	NA	NA	NA	NA	NA	NA	NA	NA	NA
chr6	73001636	73043538	+	4	113,113,167,236	RIMS1	hsa_circ_0132244	41902	629	1	Cancer_specific	Exclusively_altered_in_GBM	NA	NA	NA	NA	-1.10523	0.011645	0.0357868	Down	NA	NA	NA	NA	NA	NA	NA	NA	NA	NA	NA	NA	NA	NA	NA	NA	NA	NA	NA	NA
chr6	73016960	73043538	+	3	113,167,236	RIMS1	hsa_circ_0132250	26578	516	1	Cancer_specific	Exclusively_altered_in_GBM	NA	NA	NA	NA	-1.8855	3.01954e-08	2.11608e-06	Down	NA	NA	NA	NA	NA	NA	NA	NA	NA	NA	NA	NA	NA	NA	NA	NA	NA	NA	NA	NA
chr6	106696024	106740981	-	3	95,163,79	ATG5	hsa_circ_0006490	44957	337	1	Cancer_specific	Exclusively_altered_in_GBM	NA	NA	NA	NA	-1.06407	0.00785608	0.0263709	Down	NA	NA	NA	NA	-0.535326	0.131001	0.403941	None	NA	NA	NA	NA	NA	NA	NA	NA	NA	NA	NA	NA
chr6	111493897	111498868	+	2	145,454	SLC16A10	hsa_circ_0130335	4971	599	1	Cancer_specific	Exclusively_altered_in_GBM	NA	NA	NA	NA	-1.44803	2.14024e-05	0.000239255	Down	NA	NA	NA	NA	NA	NA	NA	NA	NA	NA	NA	NA	NA	NA	NA	NA	NA	NA	NA	NA
chr6	136698892	136710655	-	4	114,111,118,164	MAP7	hsa_circ_0130788	11763	507	1	Cancer_specific	Exclusively_altered_in_GBM	NA	NA	NA	NA	-2.29813	3.03875e-07	1.01728e-05	Down	NA	NA	NA	NA	NA	NA	NA	NA	NA	NA	NA	NA	NA	NA	NA	NA	NA	NA	NA	NA
chr6	136704808	136710655	-	3	111,118,164	MAP7	hsa_circ_0077957	5847	393	1	Cancer_specific	Exclusively_altered_in_GBM	NA	NA	NA	NA	-2.23993	4.8405e-11	1.96605e-08	Down	NA	NA	NA	NA	NA	NA	NA	NA	NA	NA	NA	NA	NA	NA	NA	NA	NA	NA	NA	NA
chr6	146240483	146254314	-	9	144,226,63,174,143,108,93,89,122	SHPRH	hsa_circ_0078143	13831	1162	1	Cancer_specific	Exclusively_altered_in_GBM	NA	NA	NA	NA	-1.62625	3.6316e-07	1.1645e-05	Down	NA	NA	NA	NA	-0.851522	0.0480141	0.223672	None	NA	NA	NA	NA	NA	NA	NA	NA	NA	NA	NA	NA
chr6	147395940	147440613	-	2	43,61	STXBP5-AS1	hsa_circ_0130950	44673	104	1	Cancer_specific	Exclusively_altered_in_GBM	NA	NA	NA	NA	-2.76051	1.39513e-06	2.93493e-05	Down	NA	NA	NA	NA	NA	NA	NA	NA	NA	NA	NA	NA	NA	NA	NA	NA	NA	NA	NA	NA
chr6	147527106	147655358	+	18	98,82,101,135,64,84,124,79,155,73,148,68,41,221,179,126,152,66	STXBP5	hsa_circ_0078155	128252	1996	1	Cancer_specific	Exclusively_altered_in_GBM	NA	NA	NA	NA	-1.63528	0.000906639	0.0047928	Down	NA	NA	NA	NA	NA	NA	NA	NA	NA	NA	NA	NA	NA	NA	NA	NA	NA	NA	NA	NA
chr6	149833290	149862722	-	11	148,97,112,67,125,117,97,143,118,65,68	PPIL4	hsa_circ_0131007	29432	1157	1	Cancer_specific	Exclusively_altered_in_GBM	NA	NA	NA	NA	-1.27689	0.000163095	0.00119001	Down	NA	NA	NA	NA	0.129217	0.741127	0.889348	None	-0.982267	0.123255	0.327686	None	NA	NA	NA	NA	NA	NA	NA	NA
chr6	152949399	152949689	-	1	290	SYNE1	hsa_circ_0003068	290	290	1	Cancer_specific	Exclusively_altered_in_GBM	NA	NA	NA	NA	-1.98827	8.71228e-06	0.000118971	Down	NA	NA	NA	NA	NA	NA	NA	NA	NA	NA	NA	NA	NA	NA	NA	NA	NA	NA	NA	NA
chr6	158922709	158925210	+	1	2501	TULP4	hsa_circ_0002163	2501	2501	1	Cancer_specific	Exclusively_altered_in_GBM	NA	NA	NA	NA	-1.95749	6.21162e-09	6.18985e-07	Down	NA	NA	NA	NA	NA	NA	NA	NA	-1.70274	0.0256506	0.134691	None	NA	NA	NA	NA	NA	NA	NA	NA
chr6	170846321	170858201	-	4	107,130,82,108	PSMB1	hsa_circ_0078784	11880	427	1	Cancer_specific	Exclusively_altered_in_GBM	NA	NA	NA	NA	-1.69449	1.6828e-06	3.28079e-05	Down	NA	NA	NA	NA	NA	NA	NA	NA	NA	NA	NA	NA	NA	NA	NA	NA	NA	NA	NA	NA
chr8	1496791	1497849	+	1	1058	DLGAP2	hsa_circ_0135971	1058	1058	1	Cancer_specific	Exclusively_altered_in_GBM	NA	NA	NA	NA	-2.10181	4.61997e-05	0.0004398	Down	NA	NA	NA	NA	NA	NA	NA	NA	NA	NA	NA	NA	NA	NA	NA	NA	NA	NA	NA	NA
chr8	10065342	10177499	+	4	69,120,105,107	MSRA	hsa_circ_0002546	112157	401	1	Cancer_specific	Exclusively_altered_in_GBM	NA	NA	NA	NA	-1.12313	0.000110528	0.000868894	Down	NA	NA	NA	NA	NA	NA	NA	NA	NA	NA	NA	NA	NA	NA	NA	NA	NA	NA	NA	NA
chr8	10102613	10177499	+	3	120,105,107	MSRA	hsa_circ_0135286	74886	332	1	Cancer_specific	Exclusively_altered_in_GBM	NA	NA	NA	NA	-1.09057	0.00616871	0.0218104	Down	NA	NA	NA	NA	NA	NA	NA	NA	NA	NA	NA	NA	NA	NA	NA	NA	NA	NA	NA	NA
chr8	42317413	42323435	-	3	97,86,141	SLC20A2	hsa_circ_0008015	6022	324	1	Cancer_specific	Exclusively_altered_in_CRC	NA	NA	NA	NA	0.107403	0.719831	0.807325	None	NA	NA	NA	NA	-0.383032	0.187133	0.473384	None	-1.13451	0.0589197	0.216773	None	-0.586196	0.19001	0.389643	None	-1.79999	1.21709e-05	0.000117779	Down
chr8	42317413	42330172	-	4	97,86,141,553	SLC20A2	hsa_circ_0009161	12759	877	1	Cancer_specific	Exclusively_altered_in_THCA	NA	NA	NA	NA	-0.332171	0.286719	0.429198	None	NA	NA	NA	NA	-1.22522	0.000347105	0.00624537	Down	-0.371245	0.59584	0.779304	None	NA	NA	NA	NA	NA	NA	NA	NA
chr8	51351102	51415440	+	5	57,58,44,42,103	SNTG1	hsa_circ_0136694	64338	304	1	Cancer_specific	Exclusively_altered_in_GBM	NA	NA	NA	NA	-1.03304	0.00746906	0.0255493	Down	NA	NA	NA	NA	NA	NA	NA	NA	NA	NA	NA	NA	NA	NA	NA	NA	NA	NA	NA	NA
chr8	51415337	51465739	+	4	103,83,131,130	SNTG1	hsa_circ_0136699	50402	447	1	Cancer_specific	Exclusively_altered_in_GBM	NA	NA	NA	NA	-1.16809	0.00119348	0.00604678	Down	NA	NA	NA	NA	NA	NA	NA	NA	NA	NA	NA	NA	NA	NA	NA	NA	NA	NA	NA	NA
chr8	52744003	52773806	-	4	124,172,103,402	PCMTD1	hsa_circ_0136720	29803	801	1	Cancer_specific	Exclusively_altered_in_CRC	NA	NA	NA	NA	-0.181397	0.562709	0.686003	None	0.425294	0.145329	0.318883	None	0.143576	0.673163	0.855248	None	1.22153	0.0172208	0.114133	None	0.945083	0.0241643	0.0969637	None	1.26169	4.58221e-05	0.000358696	Up
chr8	53028834	53085143	-	16	144,104,89,222,81,63,69,63,116,246,212,194,105,91,135,792	ST18	hsa_circ_0136726	56309	2726	1	Cancer_specific	Exclusively_altered_in_GBM	NA	NA	NA	NA	-2.04741	6.52517e-05	0.000569958	Down	NA	NA	NA	NA	NA	NA	NA	NA	NA	NA	NA	NA	NA	NA	NA	NA	NA	NA	NA	NA
chr8	54708206	54742093	-	5	193,98,105,114,90	ATP6V1H	hsa_circ_0136761	33887	600	1	Cancer_specific	Exclusively_altered_in_GBM	NA	NA	NA	NA	-1.13627	0.00396035	0.0153929	Down	NA	NA	NA	NA	NA	NA	NA	NA	NA	NA	NA	NA	NA	NA	NA	NA	NA	NA	NA	NA
chr8	68934270	68950527	+	4	105,102,162,134	PREX2	hsa_circ_0137008	16257	503	2	circRNA_altered_in_2_cancer_types	Consistently_altered	NA	NA	NA	NA	0.643901	0.0773687	0.159786	None	-1.30634	4.76553e-05	0.000720548	Down	-1.18681	0.00226789	0.0257783	Down	-1.27789	0.0462712	0.186381	None	NA	NA	NA	NA	NA	NA	NA	NA
chr8	70650274	70674110	-	3	165,218,133	SLCO5A1	hsa_circ_0084727	23836	516	1	Cancer_specific	Exclusively_altered_in_GBM	NA	NA	NA	NA	1.24913	0.00292492	0.0123751	Up	NA	NA	NA	NA	NA	NA	NA	NA	0.377002	0.578968	0.764729	None	NA	NA	NA	NA	NA	NA	NA	NA
chr8	75156763	75157410	-	1	647	JPH1	hsa_circ_0137111	647	647	1	Cancer_specific	Exclusively_altered_in_GBM	NA	NA	NA	NA	-1.44439	0.00436925	0.0167419	Down	NA	NA	NA	NA	NA	NA	NA	NA	NA	NA	NA	NA	NA	NA	NA	NA	NA	NA	NA	NA
chr8	81411728	81412617	+	1	889	ZBTB10	hsa_circ_0137155	889	889	1	Cancer_specific	Exclusively_altered_in_GBM	NA	NA	NA	NA	-1.18811	0.00519929	0.019025	Down	NA	NA	NA	NA	NA	NA	NA	NA	NA	NA	NA	NA	NA	NA	NA	NA	NA	NA	NA	NA
chr8	90736856	90737869	-	2	338,124	RP11-37B2.1	hsa_circ_0002576	1013	462	1	Cancer_specific	Exclusively_altered_in_GBM	NA	NA	NA	NA	1.23941	0.0014339	0.00708809	Up	NA	NA	NA	NA	NA	NA	NA	NA	NA	NA	NA	NA	NA	NA	NA	NA	NA	NA	NA	NA
chr8	92998351	93088365	-	8	202,86,251,182,90,242,138,173	RUNX1T1	hsa_circ_0137306	90014	1364	1	Cancer_specific	Exclusively_altered_in_LUAD	NA	NA	NA	NA	-0.725137	0.0769882	0.15927	None	-1.84678	0.000519502	0.00512274	Down	NA	NA	NA	NA	-2.57023	0.00875854	0.0814413	None	NA	NA	NA	NA	NA	NA	NA	NA
chr8	105080739	105161076	+	3	101,173,242	RIMS2	hsa_circ_0005114	80337	516	1	Cancer_specific	Exclusively_altered_in_GBM	NA	NA	NA	NA	-2.05674	1.13322e-07	5.21067e-06	Down	NA	NA	NA	NA	NA	NA	NA	NA	NA	NA	NA	NA	NA	NA	NA	NA	NA	NA	NA	NA
chr8	105105698	105161076	+	2	173,242	RIMS2	hsa_circ_0085302	55378	415	1	Cancer_specific	Exclusively_altered_in_GBM	NA	NA	NA	NA	-1.6608	1.66455e-06	3.27138e-05	Down	NA	NA	NA	NA	NA	NA	NA	NA	NA	NA	NA	NA	NA	NA	NA	NA	NA	NA	NA	NA
chr8	122640953	122641580	-	1	627	HAS2	hsa_circ_0005015	627	627	1	Cancer_specific	Exclusively_altered_in_GBM	NA	NA	NA	NA	2.33061	0.000256942	0.00172974	Up	0.0939084	0.809436	0.896638	None	NA	NA	NA	NA	-0.120802	0.827491	0.916927	None	NA	NA	NA	NA	-0.346746	0.272168	0.427196	None
chr8	133622411	133673873	-	9	96,70,60,78,183,224,173,78,168	LRRC6	hsa_circ_0135792	51462	1130	1	Cancer_specific	Exclusively_altered_in_GBM	NA	NA	NA	NA	-1.27488	0.000124953	0.000957581	Down	NA	NA	NA	NA	-0.430736	0.195897	0.482761	None	NA	NA	NA	NA	NA	NA	NA	NA	NA	NA	NA	NA
chr8	136533479	136569830	+	4	119,117,147,140	KHDRBS3	hsa_circ_0135838	36351	523	1	Cancer_specific	Exclusively_altered_in_GBM	NA	NA	NA	NA	-1.30206	0.00168832	0.00811528	Down	NA	NA	NA	NA	NA	NA	NA	NA	NA	NA	NA	NA	NA	NA	NA	NA	NA	NA	NA	NA
chr8	136533479	136594316	+	5	119,117,147,140,196	KHDRBS3	hsa_circ_0135839	60837	719	1	Cancer_specific	Exclusively_altered_in_GBM	NA	NA	NA	NA	-1.06365	0.00512348	0.0188452	Down	NA	NA	NA	NA	NA	NA	NA	NA	NA	NA	NA	NA	NA	NA	NA	NA	NA	NA	NA	NA
chr8	136554896	136594316	+	4	117,147,140,196	KHDRBS3	hsa_circ_0006059	39420	600	1	Cancer_specific	Exclusively_altered_in_GBM	NA	NA	NA	NA	-1.7469	1.88022e-07	7.09949e-06	Down	NA	NA	NA	NA	NA	NA	NA	NA	NA	NA	NA	NA	NA	NA	NA	NA	NA	NA	NA	NA
chr8	141799572	141889736	-	11	53,31,118,108,78,141,55,63,80,88,167	PTK2	hsa_circ_0135915	90164	982	1	Cancer_specific	Exclusively_altered_in_GBM	NA	NA	NA	NA	-1.17746	0.000352992	0.00227577	Down	NA	NA	NA	NA	NA	NA	NA	NA	NA	NA	NA	NA	NA	NA	NA	NA	NA	NA	NA	NA
chr8	141840570	141889736	-	5	55,63,80,88,167	PTK2	hsa_circ_0135925	49166	453	1	Cancer_specific	Exclusively_altered_in_GBM	NA	NA	NA	NA	-1.39415	0.000821018	0.00442659	Down	NA	NA	NA	NA	NA	NA	NA	NA	NA	NA	NA	NA	NA	NA	NA	NA	NA	NA	NA	NA
chr21	32554737	32575328	-	4	225,87,82,105	TIAM1	hsa_circ_0061407	20591	499	1	Cancer_specific	Exclusively_altered_in_THCA	NA	NA	NA	NA	0.160503	0.661588	0.767757	None	NA	NA	NA	NA	2.97671	1.07031e-05	0.000405527	Up	NA	NA	NA	NA	NA	NA	NA	NA	NA	NA	NA	NA
chr21	34066537	34067592	-	2	84,226	SYNJ1	hsa_circ_0002369	1055	310	1	Cancer_specific	Exclusively_altered_in_GBM	NA	NA	NA	NA	-1.33534	0.00193719	0.00903597	Down	NA	NA	NA	NA	NA	NA	NA	NA	NA	NA	NA	NA	NA	NA	NA	NA	NA	NA	NA	NA
chr21	38480691	38536517	+	22	55,163,46,124,64,61,85,135,81,113,121,123,102,93,65,137,327,252,47,57,74,165	TTC3	hsa_circ_0061671	55826	2490	1	Cancer_specific	Exclusively_altered_in_GBM	NA	NA	NA	NA	-1.42704	0.000548498	0.00319391	Down	NA	NA	NA	NA	NA	NA	NA	NA	NA	NA	NA	NA	NA	NA	NA	NA	NA	NA	NA	NA
chrX	24197299	24197887	+	1	588	ZFX	hsa_circ_0090132	588	588	1	Cancer_specific	Exclusively_altered_in_GBM	NA	NA	NA	NA	-1.37883	0.00344797	0.0137749	Down	NA	NA	NA	NA	NA	NA	NA	NA	NA	NA	NA	NA	NA	NA	NA	NA	-0.718672	0.211231	0.356109	None
chrX	32305645	32366645	-	6	173,195,183,153,138,123	DMD	hsa_circ_0140203	61000	965	1	Cancer_specific	Exclusively_altered_in_GBM	NA	NA	NA	NA	-1.80034	5.56565e-07	1.52399e-05	Down	NA	NA	NA	NA	NA	NA	NA	NA	NA	NA	NA	NA	NA	NA	NA	NA	NA	NA	NA	NA
chrX	79988954	79991587	-	4	41,101,71,101	BRWD3	hsa_circ_0091173	2633	314	1	Cancer_specific	Exclusively_altered_in_GBM	NA	NA	NA	NA	-1.6708	0.00456292	0.0172937	Down	NA	NA	NA	NA	NA	NA	NA	NA	NA	NA	NA	NA	NA	NA	NA	NA	NA	NA	NA	NA
chrX	110385323	110395675	+	3	101,154,38	PAK3	hsa_circ_0091336	10352	293	1	Cancer_specific	Exclusively_altered_in_GBM	NA	NA	NA	NA	-1.46497	6.73006e-05	0.000585755	Down	NA	NA	NA	NA	NA	NA	NA	NA	NA	NA	NA	NA	NA	NA	NA	NA	NA	NA	NA	NA
chrX	110385323	110416309	+	6	101,154,38,132,166,64	PAK3	hsa_circ_0139566	30986	655	2	circRNA_altered_in_2_cancer_types	Consistently_altered	NA	NA	NA	NA	-1.33333	3.2716e-07	1.07742e-05	Down	NA	NA	NA	NA	-1.63772	3.70766e-06	0.000162091	Down	NA	NA	NA	NA	NA	NA	NA	NA	NA	NA	NA	NA
chrX	110385323	110439868	+	11	101,154,38,132,166,64,49,113,118,100,197	PAK3	hsa_circ_0139568	54545	1232	1	Cancer_specific	Exclusively_altered_in_GBM	NA	NA	NA	NA	-2.01195	5.18739e-05	0.000477262	Down	NA	NA	NA	NA	NA	NA	NA	NA	NA	NA	NA	NA	NA	NA	NA	NA	NA	NA	NA	NA
chrX	133607388	133632714	+	7	107,184,66,18,83,47,77	HPRT1	hsa_circ_0009037	25326	582	1	Cancer_specific	Exclusively_altered_in_GBM	NA	NA	NA	NA	-1.27524	0.00019948	0.00140501	Down	NA	NA	NA	NA	NA	NA	NA	NA	NA	NA	NA	NA	NA	NA	NA	NA	NA	NA	NA	NA
chr9	3330258	3395596	-	3	259,98,125	RFX3	hsa_circ_0086242	65338	482	1	Cancer_specific	Exclusively_altered_in_GBM	NA	NA	NA	NA	1.63863	0.000726639	0.00401547	Up	NA	NA	NA	NA	NA	NA	NA	NA	NA	NA	NA	NA	NA	NA	NA	NA	NA	NA	NA	NA
chr9	4117767	4118881	-	1	1114	GLIS3	hsa_circ_0006370	1114	1114	1	Cancer_specific	Exclusively_altered_in_GBM	NA	NA	NA	NA	1.42818	0.000120525	0.000932443	Up	NA	NA	NA	NA	-0.709567	0.00568077	0.0523552	None	1.15452	0.058787	0.216712	None	-0.123171	0.747501	0.858471	None	NA	NA	NA	NA
chr9	19423859	19424839	+	2	115,142	ACER2	hsa_circ_0086482	980	257	1	Cancer_specific	Exclusively_altered_in_THCA	NA	NA	NA	NA	-0.846128	0.0236827	0.062878	None	NA	NA	NA	NA	1.48823	1.27108e-05	0.000433024	Up	0.664567	0.222361	0.452716	None	NA	NA	NA	NA	NA	NA	NA	NA
chr9	19423859	19435082	+	3	115,142,138	ACER2	hsa_circ_0086483	11223	395	1	Cancer_specific	Exclusively_altered_in_GBM	NA	NA	NA	NA	-1.79818	1.00565e-07	4.80544e-06	Down	NA	NA	NA	NA	NA	NA	NA	NA	-0.225104	0.702138	0.857149	None	NA	NA	NA	NA	NA	NA	NA	NA
chr9	20715320	20770237	+	7	89,75,155,105,102,205,207	FOCAD	hsa_circ_0138458	54917	938	1	Cancer_specific	Exclusively_altered_in_GBM	NA	NA	NA	NA	-1.44136	1.61351e-05	0.000196606	Down	NA	NA	NA	NA	-0.861909	0.0258302	0.145829	None	NA	NA	NA	NA	NA	NA	NA	NA	NA	NA	NA	NA
chr9	20715320	20789607	+	10	89,75,155,105,102,205,207,88,203,258	FOCAD	hsa_circ_0138460	74287	1487	1	Cancer_specific	Exclusively_altered_in_GBM	NA	NA	NA	NA	-1.05794	0.00181676	0.00858037	Down	NA	NA	NA	NA	-0.302046	0.276988	0.572442	None	-0.464334	0.395115	0.617089	None	NA	NA	NA	NA	0.682863	0.0345992	0.087675	None
chr9	23762003	23765097	-	2	244,91	ELAVL2	hsa_circ_0138518	3094	335	1	Cancer_specific	Exclusively_altered_in_GBM	NA	NA	NA	NA	-2.15497	8.73855e-06	0.000118971	Down	NA	NA	NA	NA	NA	NA	NA	NA	NA	NA	NA	NA	NA	NA	NA	NA	NA	NA	NA	NA
chr9	33953282	33973235	-	6	190,68,53,66,104,55	UBAP2	hsa_circ_0003141	19953	536	1	Cancer_specific	Exclusively_altered_in_THCA	NA	NA	NA	NA	0.619941	0.040625	0.0950127	None	NA	NA	NA	NA	-1.28168	0.000713227	0.0107615	Down	0.348924	0.48848	0.703366	None	-0.279162	0.475012	0.674718	None	0.787562	0.0977928	0.198847	None
chr9	78682870	78722267	+	4	89,173,213,101	PCSK5	hsa_circ_0087234	39397	576	1	Cancer_specific	Exclusively_altered_in_GBM	NA	NA	NA	NA	1.01728	0.00204011	0.00938995	Up	NA	NA	NA	NA	NA	NA	NA	NA	-0.752102	0.341483	0.577437	None	NA	NA	NA	NA	-0.0427589	0.917362	0.955667	None
chr9	88190229	88211364	-	8	161,177,132,130,181,154,145,88	AGTPBP1	hsa_circ_0005202	21135	1168	1	Cancer_specific	Exclusively_altered_in_GBM	NA	NA	NA	NA	-1.56567	2.24786e-10	6.84753e-08	Down	NA	NA	NA	NA	NA	NA	NA	NA	NA	NA	NA	NA	NA	NA	NA	NA	NA	NA	NA	NA
chr9	88190229	88248289	-	12	161,177,132,130,181,154,145,88,149,87,84,713	AGTPBP1	hsa_circ_0139171	58060	2201	1	Cancer_specific	Exclusively_altered_in_GBM	NA	NA	NA	NA	-1.47802	1.11144e-08	9.69244e-07	Down	NA	NA	NA	NA	NA	NA	NA	NA	NA	NA	NA	NA	NA	NA	NA	NA	NA	NA	NA	NA
chr9	88190229	88261333	-	14	161,177,132,130,181,154,145,88,149,87,84,713,117,98	AGTPBP1	hsa_circ_0087382	71104	2416	1	Cancer_specific	Exclusively_altered_in_GBM	NA	NA	NA	NA	-1.80462	4.2625e-05	0.000413853	Down	NA	NA	NA	NA	NA	NA	NA	NA	NA	NA	NA	NA	NA	NA	NA	NA	NA	NA	NA	NA
chr9	88200377	88248289	-	10	132,130,181,154,145,88,149,87,84,713	AGTPBP1	hsa_circ_0087386	47912	1863	1	Cancer_specific	Exclusively_altered_in_GBM	NA	NA	NA	NA	-1.51591	5.77191e-06	8.76343e-05	Down	NA	NA	NA	NA	NA	NA	NA	NA	NA	NA	NA	NA	NA	NA	NA	NA	NA	NA	NA	NA
chr9	88211276	88248289	-	5	88,149,87,84,713	AGTPBP1	hsa_circ_0007162	37013	1121	1	Cancer_specific	Exclusively_altered_in_GBM	NA	NA	NA	NA	-1.45297	4.97172e-10	1.10146e-07	Down	-0.468842	0.164963	0.349007	None	-0.10757	0.805909	0.922325	None	NA	NA	NA	NA	NA	NA	NA	NA	NA	NA	NA	NA
chr9	99271954	99327765	-	13	117,144,98,160,139,231,88,63,67,77,93,76,91	CDC14B	hsa_circ_0087636	55811	1444	1	Cancer_specific	Exclusively_altered_in_THCA	NA	NA	NA	NA	-0.230354	0.386071	0.530059	None	NA	NA	NA	NA	-1.32005	0.00105444	0.0146164	Down	0.193433	0.776749	0.897303	None	NA	NA	NA	NA	NA	NA	NA	NA
chr9	101124996	101168423	-	6	123,108,133,151,81,61	GABBR2	hsa_circ_0137505	43427	657	1	Cancer_specific	Exclusively_altered_in_GBM	NA	NA	NA	NA	-1.58017	0.000432505	0.00266125	Down	NA	NA	NA	NA	NA	NA	NA	NA	NA	NA	NA	NA	NA	NA	NA	NA	NA	NA	NA	NA
chr9	103261046	103323802	+	7	110,130,27,97,149,66,124	TMEFF1	hsa_circ_0137568	62756	703	1	Cancer_specific	Exclusively_altered_in_GBM	NA	NA	NA	NA	-1.92515	9.47177e-06	0.000127529	Down	NA	NA	NA	NA	NA	NA	NA	NA	NA	NA	NA	NA	NA	NA	NA	NA	NA	NA	NA	NA
chr9	111954557	111962614	-	3	78,178,99	EPB41L4B	hsa_circ_0137676	8057	355	1	Cancer_specific	Exclusively_altered_in_GBM	NA	NA	NA	NA	-1.75344	6.33277e-06	9.36772e-05	Down	NA	NA	NA	NA	NA	NA	NA	NA	NA	NA	NA	NA	NA	NA	NA	NA	NA	NA	NA	NA
chr9	124736287	124752049	-	3	116,96,576	TTLL11	hsa_circ_0088353	15762	788	2	circRNA_altered_in_2_cancer_types	Consistently_altered	NA	NA	NA	NA	-1.13511	7.02178e-06	0.000102468	Down	NA	NA	NA	NA	NA	NA	NA	NA	-2.39872	0.00239418	0.0410525	Down	NA	NA	NA	NA	NA	NA	NA	NA
chr9	124751473	124752049	-	1	576	TTLL11	hsa_circ_0088354	576	576	2	circRNA_altered_in_2_cancer_types	Consistently_altered	NA	NA	NA	NA	-1.2415	1.63167e-05	0.00019783	Down	NA	NA	NA	NA	NA	NA	NA	NA	-2.2927	0.00120514	0.0240248	Down	NA	NA	NA	NA	-0.903574	0.0918258	0.19031	None
chr9	129154344	129184227	+	3	130,123,95	MVB12B	hsa_circ_0088614	29883	348	1	Cancer_specific	Exclusively_altered_in_GBM	NA	NA	NA	NA	-1.3568	1.55896e-05	0.000190913	Down	NA	NA	NA	NA	NA	NA	NA	NA	NA	NA	NA	NA	NA	NA	NA	NA	NA	NA	NA	NA
chr22	18138427	18171908	+	3	171,108,157	BCL2L13	hsa_circ_0116176	33481	436	1	Cancer_specific	Exclusively_altered_in_GBM	NA	NA	NA	NA	1.32728	0.00176455	0.00841529	Up	NA	NA	NA	NA	NA	NA	NA	NA	NA	NA	NA	NA	NA	NA	NA	NA	NA	NA	NA	NA
chr22	33376629	33402809	-	2	58,473	SYN3	hsa_circ_0062997	26180	531	1	Cancer_specific	Exclusively_altered_in_GBM	NA	NA	NA	NA	-1.73663	2.2772e-05	0.000247747	Down	NA	NA	NA	NA	NA	NA	NA	NA	NA	NA	NA	NA	NA	NA	NA	NA	NA	NA	NA	NA
chr22	33402336	33402809	-	1	473	SYN3	hsa_circ_0116493	473	473	1	Cancer_specific	Exclusively_altered_in_GBM	NA	NA	NA	NA	-1.02597	0.0170518	0.0483991	Down	NA	NA	NA	NA	NA	NA	NA	NA	NA	NA	NA	NA	NA	NA	NA	NA	NA	NA	NA	NA
chr22	39534640	39537441	-	2	67,66	CBX7	hsa_circ_0116570	2801	133	3	circRNA_altered_in_3_cancer_types	Consistently_altered	NA	NA	NA	NA	-1.00179	0.0047586	0.0178962	Down	-1.12508	0.00386859	0.0265877	Down	0.424887	0.148391	0.423087	None	-0.723664	0.192312	0.42088	None	NA	NA	NA	NA	-1.04217	0.0159266	0.0485702	Down
chr20	3888572	3899443	+	5	353,254,177,124,126	PANK2	hsa_circ_0005650	10871	1034	1	Cancer_specific	Exclusively_altered_in_GBM	NA	NA	NA	NA	-1.17002	0.00333782	0.0134229	Down	NA	NA	NA	NA	NA	NA	NA	NA	NA	NA	NA	NA	NA	NA	NA	NA	NA	NA	NA	NA
chr20	9538254	9547031	-	3	127,134,492	PAK7	hsa_circ_0115623	8777	753	1	Cancer_specific	Exclusively_altered_in_GBM	NA	NA	NA	NA	-1.27859	0.000966535	0.00506547	Down	NA	NA	NA	NA	NA	NA	NA	NA	NA	NA	NA	NA	NA	NA	NA	NA	NA	NA	NA	NA
chr20	47707278	47711500	+	5	98,86,82,147,232	CSE1L	hsa_circ_0060762	4222	645	1	Cancer_specific	Exclusively_altered_in_CRC	NA	NA	NA	NA	-0.138185	0.677792	0.777657	None	NA	NA	NA	NA	NA	NA	NA	NA	-0.256617	0.760289	0.892844	None	NA	NA	NA	NA	1.06455	0.00352248	0.0139649	Up
chr20	50255881	50307358	-	8	162,213,113,143,161,77,76,81	ATP9A	hsa_circ_0002991	51477	1026	1	Cancer_specific	Exclusively_altered_in_GBM	NA	NA	NA	NA	-1.03701	0.00227129	0.0102313	Down	NA	NA	NA	NA	NA	NA	NA	NA	NA	NA	NA	NA	NA	NA	NA	NA	NA	NA	NA	NA
chr20	50273476	50307358	-	7	213,113,143,161,77,76,81	ATP9A	hsa_circ_0006341	33882	864	1	Cancer_specific	Exclusively_altered_in_CRC	NA	NA	NA	NA	-0.231736	0.457691	0.599674	None	NA	NA	NA	NA	-0.54582	0.0688377	0.279448	None	NA	NA	NA	NA	NA	NA	NA	NA	1.89764	1.98223e-08	4.87232e-07	Up
chr20	50329504	50346517	-	3	109,114,145	ATP9A	hsa_circ_0008694	17013	368	1	Cancer_specific	Exclusively_altered_in_GC	NA	NA	NA	NA	-0.385608	0.300756	0.443133	None	NA	NA	NA	NA	NA	NA	NA	NA	3.52308	0.00117665	0.023904	Up	NA	NA	NA	NA	NA	NA	NA	NA
chr7	810107	814799	+	3	148,151,157	HEATR2	hsa_circ_0001667	4692	456	1	Cancer_specific	Exclusively_altered_in_GBM	NA	NA	NA	NA	1.04175	0.0123445	0.0375106	Up	NA	NA	NA	NA	NA	NA	NA	NA	0.739566	0.157146	0.374932	None	NA	NA	NA	NA	NA	NA	NA	NA
chr7	8043537	8110761	+	5	152,87,117,153,211	GLCCI1	hsa_circ_0134778	67224	720	1	Cancer_specific	Exclusively_altered_in_GBM	NA	NA	NA	NA	-1.26571	4.68965e-07	1.36056e-05	Down	NA	NA	NA	NA	0.347752	0.159599	0.441747	None	-0.652662	0.208336	0.436036	None	NA	NA	NA	NA	NA	NA	NA	NA
chr7	8257934	8275635	-	5	199,124,73,166,96	ICA1	hsa_circ_0079422	17701	658	3	circRNA_altered_in_3_cancer_types	Inconsistently_altered	NA	NA	NA	NA	-1.78252	2.81426e-10	7.61721e-08	Down	-0.0787314	0.837799	0.913523	None	-0.884393	0.00870203	0.0686896	None	2.10832	4.63602e-05	0.00515269	Up	0.0919037	0.840483	0.916658	None	1.35107	5.49542e-05	0.000414348	Up
chr7	14647058	14712652	-	5	75,74,117,36,99	DGKB	hsa_circ_0133628	65594	401	1	Cancer_specific	Exclusively_altered_in_GC	NA	NA	NA	NA	0.191884	0.578951	0.699155	None	NA	NA	NA	NA	NA	NA	NA	NA	-4.44174	1.37579e-05	0.0023376	Down	NA	NA	NA	NA	NA	NA	NA	NA
chr7	14712553	14775819	-	9	99,117,89,118,120,75,50,144,154	DGKB	hsa_circ_0133639	63266	966	1	Cancer_specific	Exclusively_altered_in_GBM	NA	NA	NA	NA	-1.50567	2.18524e-06	4.05806e-05	Down	NA	NA	NA	NA	NA	NA	NA	NA	NA	NA	NA	NA	NA	NA	NA	NA	NA	NA	NA	NA
chr7	16415716	16445962	-	2	150,277	ISPD	hsa_circ_0002228	30246	427	1	Cancer_specific	Exclusively_altered_in_GBM	NA	NA	NA	NA	-1.09696	0.00517994	0.0190113	Down	NA	NA	NA	NA	NA	NA	NA	NA	NA	NA	NA	NA	NA	NA	NA	NA	NA	NA	NA	NA
chr7	20406634	20420454	+	3	175,247,166	ITGB8	hsa_circ_0079540	13820	588	1	Cancer_specific	Exclusively_altered_in_GBM	NA	NA	NA	NA	1.25254	0.00140211	0.006945	Up	NA	NA	NA	NA	NA	NA	NA	NA	NA	NA	NA	NA	NA	NA	NA	NA	NA	NA	NA	NA
chr7	30363257	30402072	+	3	96,106,80	ZNRF2	hsa_circ_0134080	38815	282	1	Cancer_specific	Exclusively_altered_in_GBM	NA	NA	NA	NA	-1.54601	0.000498194	0.00295401	Down	NA	NA	NA	NA	NA	NA	NA	NA	NA	NA	NA	NA	NA	NA	NA	NA	NA	NA	NA	NA
chr7	33388679	33427756	+	7	103,105,15,141,96,173,153	BBS9	hsa_circ_0079812	39077	786	1	Cancer_specific	Exclusively_altered_in_GBM	NA	NA	NA	NA	1.54542	1.39791e-06	2.93493e-05	Up	-0.519124	0.151598	0.328076	None	0.0139145	0.9509	0.989795	None	NA	NA	NA	NA	NA	NA	NA	NA	NA	NA	NA	NA
chr7	35050079	35058208	-	5	94,121,138,88,25	DPY19L1	hsa_circ_0134201	8129	466	2	circRNA_altered_in_2_cancer_types	Consistently_altered	NA	NA	NA	NA	-0.229398	0.372883	0.515145	None	1.5172	0.000498562	0.00496482	Up	0.304879	0.28413	0.581266	None	0.330143	0.471508	0.685264	None	-0.505309	0.188906	0.388967	None	1.20686	0.000168992	0.0010989	Up
chr7	36320723	36336796	+	4	111,135,139,195	EEPD1	hsa_circ_0001956	16073	580	1	Cancer_specific	Exclusively_altered_in_GBM	NA	NA	NA	NA	1.39697	0.00204598	0.00938995	Up	NA	NA	NA	NA	NA	NA	NA	NA	NA	NA	NA	NA	NA	NA	NA	NA	NA	NA	NA	NA
chr7	43508518	43540921	+	6	186,135,106,97,84,110	HECW1	hsa_circ_0079958	32403	718	1	Cancer_specific	Exclusively_altered_in_GBM	NA	NA	NA	NA	-1.22821	0.00497871	0.0185238	Down	NA	NA	NA	NA	NA	NA	NA	NA	NA	NA	NA	NA	NA	NA	NA	NA	NA	NA	NA	NA
chr7	43531673	43540921	+	4	106,97,84,110	HECW1	hsa_circ_0005017	9248	397	1	Cancer_specific	Exclusively_altered_in_GBM	NA	NA	NA	NA	-1.65285	0.000123221	0.00095028	Down	NA	NA	NA	NA	NA	NA	NA	NA	NA	NA	NA	NA	NA	NA	NA	NA	NA	NA	NA	NA
chr7	77789341	77814987	-	4	249,193,92,42	MAGI2	hsa_circ_0134739	25646	576	1	Cancer_specific	Exclusively_altered_in_GBM	NA	NA	NA	NA	-1.08808	1.10199e-06	2.44976e-05	Down	NA	NA	NA	NA	NA	NA	NA	NA	NA	NA	NA	NA	NA	NA	NA	NA	NA	NA	NA	NA
chr7	77789341	77824380	-	4	249,193,92,190	MAGI2	hsa_circ_0080874	35039	724	1	Cancer_specific	Exclusively_altered_in_GBM	NA	NA	NA	NA	-1.38645	0.00174848	0.00835499	Down	NA	NA	NA	NA	NA	NA	NA	NA	NA	NA	NA	NA	NA	NA	NA	NA	NA	NA	NA	NA
chr7	77973094	77975360	-	2	183,122	MAGI2	hsa_circ_0134748	2266	305	1	Cancer_specific	Exclusively_altered_in_GBM	NA	NA	NA	NA	-1.25689	0.0166884	0.0477904	Down	NA	NA	NA	NA	NA	NA	NA	NA	NA	NA	NA	NA	NA	NA	NA	NA	NA	NA	NA	NA
chr7	81689743	81714216	-	4	100,51,70,132	CACNA2D1	hsa_circ_0134825	24473	353	1	Cancer_specific	Exclusively_altered_in_GBM	NA	NA	NA	NA	-1.12777	0.0145143	0.0428298	Down	NA	NA	NA	NA	NA	NA	NA	NA	NA	NA	NA	NA	NA	NA	NA	NA	NA	NA	NA	NA
chr7	82763565	82764972	-	1	1407	PCLO	hsa_circ_0080941	1407	1407	1	Cancer_specific	Exclusively_altered_in_GBM	NA	NA	NA	NA	-1.80627	3.89039e-06	6.32058e-05	Down	NA	NA	NA	NA	NA	NA	NA	NA	NA	NA	NA	NA	NA	NA	NA	NA	NA	NA	NA	NA
chr7	84666204	84697600	-	6	145,70,115,143,129,94	SEMA3D	hsa_circ_0134893	31396	696	1	Cancer_specific	Exclusively_altered_in_THCA	NA	NA	NA	NA	0.396912	0.615521	0.728167	None	NA	NA	NA	NA	-3.06467	1.6105e-11	4.57651e-09	Down	NA	NA	NA	NA	NA	NA	NA	NA	NA	NA	NA	NA
chr7	90355880	90377090	+	2	246,95	CDK14	hsa_circ_0004015	21210	341	1	Cancer_specific	Exclusively_altered_in_GBM	NA	NA	NA	NA	1.21994	0.00165135	0.00800066	Up	NA	NA	NA	NA	NA	NA	NA	NA	NA	NA	NA	NA	NA	NA	NA	NA	NA	NA	NA	NA
chr7	91924202	91948826	+	3	278,298,183	ANKIB1	hsa_circ_0001723	24624	759	1	Cancer_specific	Exclusively_altered_in_GBM	NA	NA	NA	NA	-1.06653	3.03909e-08	2.11608e-06	Down	NA	NA	NA	NA	-0.110365	0.741182	0.889348	None	0.217102	0.650694	0.824954	None	NA	NA	NA	NA	-0.0307352	0.930423	0.964157	None
chr7	102743497	102769239	-	5	72,131,115,647,310	NAPEPLD	hsa_circ_0132837	25742	1275	1	Cancer_specific	Exclusively_altered_in_GBM	NA	NA	NA	NA	-1.12299	0.00156609	0.0076331	Down	NA	NA	NA	NA	NA	NA	NA	NA	NA	NA	NA	NA	NA	NA	NA	NA	NA	NA	NA	NA
chr7	104707173	104731761	+	10	81,59,173,39,231,131,118,110,265,99	KMT2E	hsa_circ_0132879	24588	1306	1	Cancer_specific	Exclusively_altered_in_GBM	NA	NA	NA	NA	-1.20878	0.00841204	0.0277524	Down	NA	NA	NA	NA	NA	NA	NA	NA	NA	NA	NA	NA	NA	NA	NA	NA	NA	NA	NA	NA
chr7	111575594	111585853	-	4	89,133,61,82	DOCK4	hsa_circ_0005937	10259	365	1	Cancer_specific	Exclusively_altered_in_LUAD	NA	NA	NA	NA	-0.0842005	0.719262	0.807325	None	-1.83855	2.22117e-12	1.25941e-09	Down	NA	NA	NA	NA	NA	NA	NA	NA	NA	NA	NA	NA	NA	NA	NA	NA
chr7	121985627	122056218	-	10	108,33,84,75,4,159,156,142,157,104	CADPS2	hsa_circ_0133190	70591	1022	1	Cancer_specific	Exclusively_altered_in_GBM	NA	NA	NA	NA	-2.9237	1.37283e-07	5.76355e-06	Down	NA	NA	NA	NA	NA	NA	NA	NA	NA	NA	NA	NA	NA	NA	NA	NA	NA	NA	NA	NA
chr7	122019421	122033636	-	5	75,4,159,156,142	CADPS2	hsa_circ_0003773	14215	536	1	Cancer_specific	Exclusively_altered_in_GBM	NA	NA	NA	NA	-1.71101	0.00056533	0.00324167	Down	NA	NA	NA	NA	NA	NA	NA	NA	NA	NA	NA	NA	NA	NA	NA	NA	NA	NA	NA	NA
chr7	126882748	126883569	-	1	821	GRM8	hsa_circ_0133238	821	821	1	Cancer_specific	Exclusively_altered_in_CRC	NA	NA	NA	NA	-0.911444	0.0166371	0.047732	None	NA	NA	NA	NA	NA	NA	NA	NA	NA	NA	NA	NA	NA	NA	NA	NA	4.17843	1.89633e-10	8.96381e-09	Up
chr7	131060182	131130662	+	11	70,143,89,110,193,78,66,113,213,222,130	MKLN1	hsa_circ_0003047	70480	1427	1	Cancer_specific	Exclusively_altered_in_GBM	NA	NA	NA	NA	1.4543	0.00167357	0.00806027	Up	NA	NA	NA	NA	NA	NA	NA	NA	NA	NA	NA	NA	NA	NA	NA	NA	NA	NA	NA	NA
chr7	137206611	137294355	-	13	101,200,112,74,63,56,79,138,114,61,83,99,75	DGKI	hsa_circ_0133458	87744	1255	1	Cancer_specific	Exclusively_altered_in_GBM	NA	NA	NA	NA	-1.11894	0.00714429	0.0245913	Down	NA	NA	NA	NA	NA	NA	NA	NA	NA	NA	NA	NA	NA	NA	NA	NA	NA	NA	NA	NA
chr7	137237114	137294355	-	12	200,112,74,63,56,79,138,114,61,83,99,75	DGKI	hsa_circ_0133463	57241	1154	1	Cancer_specific	Exclusively_altered_in_GBM	NA	NA	NA	NA	-1.32012	0.00079665	0.00433356	Down	NA	NA	NA	NA	NA	NA	NA	NA	NA	NA	NA	NA	NA	NA	NA	NA	NA	NA	NA	NA
chr7	140301202	140302342	-	1	1140	DENND2A	hsa_circ_0002142	1140	1140	1	Cancer_specific	Exclusively_altered_in_GBM	NA	NA	NA	NA	1.01932	0.00482871	0.0180877	Up	-0.389391	0.339285	0.564977	None	NA	NA	NA	NA	-1.43078	0.0817122	0.25841	None	NA	NA	NA	NA	NA	NA	NA	NA
chr7	152480271	152522207	+	8	56,125,111,96,108,144,174,93	ACTR3B	hsa_circ_0005181	41936	907	1	Cancer_specific	Exclusively_altered_in_GBM	NA	NA	NA	NA	-1.39403	1.25372e-05	0.000160722	Down	NA	NA	NA	NA	NA	NA	NA	NA	NA	NA	NA	NA	NA	NA	NA	NA	NA	NA	NA	NA
chr7	156516805	156619438	-	12	67,91,74,78,77,81,73,65,69,127,104,140	LMBR1	hsa_circ_0004673	102633	1046	1	Cancer_specific	Exclusively_altered_in_GBM	NA	NA	NA	NA	-1.24749	0.000416363	0.00258846	Down	NA	NA	NA	NA	NA	NA	NA	NA	NA	NA	NA	NA	NA	NA	NA	NA	NA	NA	NA	NA
chr5	14316621	14336836	+	3	231,123,192	TRIO	hsa_circ_0005260	20215	546	1	Cancer_specific	Exclusively_altered_in_HCC	NA	NA	NA	NA	0.323822	0.391611	0.53527	None	NA	NA	NA	NA	NA	NA	NA	NA	0.0567861	0.921358	0.960017	None	1.64315	0.000189325	0.0027401	Up	0.176395	0.672134	0.804335	None
chr5	38496483	38530768	-	12	214,71,163,146,170,130,255,175,164,140,115,161	LIFR	hsa_circ_0072305	34285	1904	1	Cancer_specific	Exclusively_altered_in_THCA	NA	NA	NA	NA	0.319572	0.294163	0.436495	None	-0.424923	0.457041	0.682715	None	-1.39502	0.00118817	0.0162066	Down	NA	NA	NA	NA	NA	NA	NA	NA	NA	NA	NA	NA
chr5	38510565	38530768	-	6	255,175,164,140,115,161	LIFR	hsa_circ_0129046	20203	1010	3	circRNA_altered_in_3_cancer_types	Consistently_altered	NA	NA	NA	NA	0.464717	0.05472	0.121895	None	-1.0864	0.000797823	0.00723785	Down	-1.35446	0.00187677	0.0227531	Down	-2.84347	0.00140294	0.0267561	Down	NA	NA	NA	NA	NA	NA	NA	NA
chr5	58284319	58289292	-	5	100,165,99,173,94	PDE4D	hsa_circ_0001487	4973	631	1	Cancer_specific	Exclusively_altered_in_LUAD	NA	NA	NA	NA	-0.57388	0.123505	0.227499	None	1.46887	4.88892e-05	0.000729478	Up	-0.926653	0.00796208	0.0650603	None	-0.19735	0.703803	0.85771	None	NA	NA	NA	NA	-0.556065	0.0787701	0.16807	None
chr5	73930508	73932323	-	1	1815	ENC1	hsa_circ_0006859	1815	1815	3	circRNA_altered_in_3_cancer_types	Consistently_altered	NA	NA	NA	NA	-0.072535	0.86965	0.909196	None	1.92536	4.11957e-09	3.33685e-07	Up	NA	NA	NA	NA	2.57349	3.22875e-06	0.000754318	Up	0.509856	0.176264	0.374673	None	2.74928	3.17538e-13	3.00196e-11	Up
chr5	74109664	74137504	-	4	180,86,100,135	FAM169A	hsa_circ_0007158	27840	501	2	circRNA_altered_in_2_cancer_types	Consistently_altered	NA	NA	NA	NA	-0.108105	0.56248	0.686003	None	NA	NA	NA	NA	-0.170655	0.555265	0.783859	None	NA	NA	NA	NA	1.98197	0.000875734	0.00884822	Up	2.27496	0.00156686	0.00740644	Up
chr5	76745584	76759051	-	5	111,63,112,63,132	WDR41	hsa_circ_0008089	13467	481	1	Cancer_specific	Exclusively_altered_in_GBM	NA	NA	NA	NA	1.14395	0.00121497	0.00613021	Up	NA	NA	NA	NA	NA	NA	NA	NA	NA	NA	NA	NA	NA	NA	NA	NA	NA	NA	NA	NA
chr5	76745584	76785397	-	7	111,63,112,63,132,49,116	WDR41	hsa_circ_0073081	39813	646	1	Cancer_specific	Exclusively_altered_in_CRC	NA	NA	NA	NA	0.847102	0.00760851	0.0257465	None	NA	NA	NA	NA	-0.158211	0.57172	0.791095	None	NA	NA	NA	NA	NA	NA	NA	NA	-1.49348	0.0045149	0.0171259	Down
chr5	80388619	80422982	+	8	161,67,137,83,249,383,126,90	RASGRF2	hsa_circ_0008226	34363	1296	1	Cancer_specific	Exclusively_altered_in_GBM	NA	NA	NA	NA	-2.04482	1.951e-05	0.000224821	Down	0.940996	0.0389208	0.131358	None	-0.930137	0.00788631	0.0650603	None	-0.419399	0.551685	0.751372	None	NA	NA	NA	NA	NA	NA	NA	NA
chr5	80785068	80946158	-	5	60,90,85,62,73	SSBP2	hsa_circ_0073219	161090	370	1	Cancer_specific	Exclusively_altered_in_GC	NA	NA	NA	NA	-0.0633601	0.903219	0.933479	None	NA	NA	NA	NA	NA	NA	NA	NA	-2.92972	0.000864716	0.0200257	Down	NA	NA	NA	NA	NA	NA	NA	NA
chr5	88201025	88261732	+	2	62,75	MEF2C-AS1	hsa_circ_0129941	60707	137	1	Cancer_specific	Exclusively_altered_in_GBM	NA	NA	NA	NA	-1.48324	0.00311864	0.0128598	Down	NA	NA	NA	NA	NA	NA	NA	NA	NA	NA	NA	NA	NA	NA	NA	NA	NA	NA	NA	NA
chr5	94114814	94248681	-	11	54,120,120,75,102,103,103,94,187,131,171	MCTP1	hsa_circ_0073379	133867	1260	1	Cancer_specific	Exclusively_altered_in_GBM	NA	NA	NA	NA	-1.21323	0.000862613	0.00462014	Down	NA	NA	NA	NA	NA	NA	NA	NA	NA	NA	NA	NA	NA	NA	NA	NA	NA	NA	NA	NA
chr5	94204037	94248681	-	9	120,75,102,103,103,94,187,131,171	MCTP1	hsa_circ_0005540	44644	1086	1	Cancer_specific	Exclusively_altered_in_GBM	NA	NA	NA	NA	-1.7686	1.89359e-07	7.09949e-06	Down	NA	NA	NA	NA	NA	NA	NA	NA	NA	NA	NA	NA	NA	NA	NA	NA	NA	NA	NA	NA
chr5	94224583	94248681	-	4	94,187,131,171	MCTP1	hsa_circ_0001512	24098	583	1	Cancer_specific	Exclusively_altered_in_GBM	NA	NA	NA	NA	-1.64137	1.56609e-06	3.15419e-05	Down	NA	NA	NA	NA	NA	NA	NA	NA	-0.258466	0.74348	0.883384	None	NA	NA	NA	NA	NA	NA	NA	NA
chr5	95099211	95119667	+	4	113,121,174,167	RHOBTB3	hsa_circ_0006725	20456	575	1	Cancer_specific	Exclusively_altered_in_THCA	NA	NA	NA	NA	0.764848	0.0294023	0.0734154	None	NA	NA	NA	NA	1.1716	0.00237635	0.0268323	Up	-0.128453	0.796908	0.906675	None	0.169943	0.690293	0.823279	None	0.41066	0.186168	0.325926	None
chr5	107684099	107703654	-	3	132,258,123	FBXL17	hsa_circ_0001518	19555	513	1	Cancer_specific	Exclusively_altered_in_LUAD	NA	NA	NA	NA	-0.0578782	0.778323	0.849583	None	1.11836	0.00123549	0.0107106	Up	-0.203247	0.473282	0.732255	None	0.630598	0.250912	0.486973	None	0.481038	0.220513	0.434136	None	0.421497	0.217532	0.363946	None
chr5	108691615	108719221	-	6	112,183,186,1051,201,118	PJA2	hsa_circ_0127506	27606	1851	1	Cancer_specific	Exclusively_altered_in_GBM	NA	NA	NA	NA	-1.88867	6.80618e-05	0.000590273	Down	NA	NA	NA	NA	NA	NA	NA	NA	NA	NA	NA	NA	NA	NA	NA	NA	NA	NA	NA	NA
chr5	108698540	108719221	-	5	183,186,1051,201,118	PJA2	hsa_circ_0073536	20681	1739	1	Cancer_specific	Exclusively_altered_in_GBM	NA	NA	NA	NA	-1.56512	0.0022615	0.010206	Down	NA	NA	NA	NA	NA	NA	NA	NA	NA	NA	NA	NA	NA	NA	NA	NA	NA	NA	NA	NA
chr5	109049220	109091157	+	4	255,145,172,128	MAN2A1	hsa_circ_0127512	41937	700	1	Cancer_specific	Exclusively_altered_in_GBM	NA	NA	NA	NA	-1.08972	4.67526e-06	7.54544e-05	Down	-0.232116	0.537034	0.737285	None	-0.32496	0.322466	0.621356	None	-0.0628866	0.907749	0.958091	None	0.650073	0.117092	0.295072	None	-0.196531	0.617523	0.758177	None
chr5	109049220	109110666	+	7	255,145,172,128,174,187,178	MAN2A1	hsa_circ_0127514	61446	1239	1	Cancer_specific	Exclusively_altered_in_GBM	NA	NA	NA	NA	-1.14543	0.000812843	0.004402	Down	NA	NA	NA	NA	NA	NA	NA	NA	NA	NA	NA	NA	NA	NA	NA	NA	NA	NA	NA	NA
chr5	109049220	109125228	+	11	255,145,172,128,174,187,178,203,183,115,68	MAN2A1	hsa_circ_0073539	76008	1808	1	Cancer_specific	Exclusively_altered_in_GBM	NA	NA	NA	NA	-1.48478	8.4517e-10	1.4712e-07	Down	NA	NA	NA	NA	NA	NA	NA	NA	NA	NA	NA	NA	NA	NA	NA	NA	NA	NA	NA	NA
chr5	109049220	109159538	+	15	255,145,172,128,174,187,178,203,183,115,68,166,219,123,115	MAN2A1	hsa_circ_0073542	110318	2431	1	Cancer_specific	Exclusively_altered_in_GBM	NA	NA	NA	NA	-1.29363	1.43595e-05	0.000178986	Down	NA	NA	NA	NA	NA	NA	NA	NA	NA	NA	NA	NA	NA	NA	NA	NA	NA	NA	NA	NA
chr5	109103235	109125228	+	7	174,187,178,203,183,115,68	MAN2A1	hsa_circ_0127521	21993	1108	1	Cancer_specific	Exclusively_altered_in_GBM	NA	NA	NA	NA	-1.94496	1.34355e-07	5.74428e-06	Down	NA	NA	NA	NA	-1.21657	0.0053216	0.0504073	None	NA	NA	NA	NA	NA	NA	NA	NA	NA	NA	NA	NA
chr5	109103235	109159538	+	11	174,187,178,203,183,115,68,166,219,123,115	MAN2A1	hsa_circ_0127523	56303	1731	1	Cancer_specific	Exclusively_altered_in_GBM	NA	NA	NA	NA	-2.35184	8.76822e-12	5.34204e-09	Down	NA	NA	NA	NA	NA	NA	NA	NA	NA	NA	NA	NA	NA	NA	NA	NA	NA	NA	NA	NA
chr5	109117096	109159538	+	8	203,183,115,68,166,219,123,115	MAN2A1	hsa_circ_0127528	42442	1192	1	Cancer_specific	Exclusively_altered_in_GBM	NA	NA	NA	NA	-1.96984	3.30359e-06	5.67281e-05	Down	NA	NA	NA	NA	NA	NA	NA	NA	NA	NA	NA	NA	NA	NA	NA	NA	NA	NA	NA	NA
chr5	109152973	109159538	+	4	166,219,123,115	MAN2A1	hsa_circ_0127534	6565	623	1	Cancer_specific	Exclusively_altered_in_GBM	NA	NA	NA	NA	-1.57817	1.45833e-05	0.000180403	Down	NA	NA	NA	NA	NA	NA	NA	NA	NA	NA	NA	NA	NA	NA	NA	NA	NA	NA	NA	NA
chr5	109152973	109183491	+	7	166,219,123,115,134,142,134	MAN2A1	hsa_circ_0127537	30518	1033	1	Cancer_specific	Exclusively_altered_in_GBM	NA	NA	NA	NA	-2.1981	3.24025e-05	0.000331785	Down	NA	NA	NA	NA	NA	NA	NA	NA	NA	NA	NA	NA	NA	NA	NA	NA	NA	NA	NA	NA
chr5	127449903	127477673	+	8	76,96,140,111,109,128,85,152	SLC12A2	hsa_circ_0127819	27770	897	1	Cancer_specific	Exclusively_altered_in_GBM	NA	NA	NA	NA	-2.2316	1.42104e-06	2.93493e-05	Down	NA	NA	NA	NA	NA	NA	NA	NA	NA	NA	NA	NA	NA	NA	NA	NA	NA	NA	NA	NA
chr5	127474288	127488497	+	8	128,85,152,108,124,102,156,100	SLC12A2	hsa_circ_0006034	14209	955	1	Cancer_specific	Exclusively_altered_in_GBM	NA	NA	NA	NA	-1.62812	4.31244e-07	1.29746e-05	Down	-0.376794	0.330485	0.554394	None	NA	NA	NA	NA	-0.480181	0.303852	0.543637	None	NA	NA	NA	NA	0.805173	0.00950773	0.0315811	None
chr5	129015456	129040084	+	5	158,154,136,205,153	ADAMTS19	hsa_circ_0073816	24628	806	1	Cancer_specific	Exclusively_altered_in_GBM	NA	NA	NA	NA	-1.07321	0.00851127	0.0279919	Down	NA	NA	NA	NA	NA	NA	NA	NA	NA	NA	NA	NA	NA	NA	NA	NA	NA	NA	NA	NA
chr5	129019812	129040084	+	4	154,136,205,153	ADAMTS19	hsa_circ_0073817	20272	648	1	Cancer_specific	Exclusively_altered_in_GBM	NA	NA	NA	NA	-1.51398	0.00688638	0.0238382	Down	NA	NA	NA	NA	NA	NA	NA	NA	NA	NA	NA	NA	NA	NA	NA	NA	NA	NA	NA	NA
chr5	142434003	142513670	+	5	88,59,106,160,139	ARHGAP26	hsa_circ_0074372	79667	552	1	Cancer_specific	Exclusively_altered_in_GBM	NA	NA	NA	NA	-1.31666	0.00353615	0.014081	Down	NA	NA	NA	NA	NA	NA	NA	NA	NA	NA	NA	NA	NA	NA	NA	NA	NA	NA	NA	NA
chr5	142434003	142526946	+	6	88,59,106,160,139,151	ARHGAP26	hsa_circ_0074373	92943	703	1	Cancer_specific	Exclusively_altered_in_GBM	NA	NA	NA	NA	-1.47996	0.00233275	0.0104119	Down	NA	NA	NA	NA	NA	NA	NA	NA	NA	NA	NA	NA	NA	NA	NA	NA	NA	NA	NA	NA
chr5	147785819	147796767	+	6	138,94,131,171,143,211	FBXO38	hsa_circ_0128310	10948	888	1	Cancer_specific	Exclusively_altered_in_GBM	NA	NA	NA	NA	-1.30825	0.000112321	0.000877327	Down	NA	NA	NA	NA	NA	NA	NA	NA	NA	NA	NA	NA	NA	NA	NA	NA	NA	NA	NA	NA
chr5	147928230	147929825	-	2	201,126	HTR4	hsa_circ_0128314	1595	327	1	Cancer_specific	Exclusively_altered_in_GBM	NA	NA	NA	NA	-1.12813	0.0105379	0.0330514	Down	NA	NA	NA	NA	NA	NA	NA	NA	-0.202362	0.891466	0.949022	None	NA	NA	NA	NA	-0.694187	0.0477787	0.114464	None
chr5	160757889	160763776	-	3	245,153,138	GABRB2	hsa_circ_0128482	5887	536	2	circRNA_altered_in_2_cancer_types	Inconsistently_altered	NA	NA	NA	NA	-1.96447	5.3152e-08	3.1593e-06	Down	NA	NA	NA	NA	4.01171	3.14284e-05	0.000956883	Up	NA	NA	NA	NA	NA	NA	NA	NA	NA	NA	NA	NA
chr5	172535626	172550205	+	4	195,190,74,123	CREBRF	hsa_circ_0128618	14579	582	1	Cancer_specific	Exclusively_altered_in_GBM	NA	NA	NA	NA	-1.20074	0.00548222	0.0197636	Down	NA	NA	NA	NA	NA	NA	NA	NA	-1.78844	0.0233297	0.13073	None	NA	NA	NA	NA	NA	NA	NA	NA
chr3	2924828	2944689	+	4	103,185,137,130	CNTN4	hsa_circ_0123465	19861	555	1	Cancer_specific	Exclusively_altered_in_GBM	NA	NA	NA	NA	-1.18283	0.015779	0.0457779	Down	NA	NA	NA	NA	NA	NA	NA	NA	NA	NA	NA	NA	NA	NA	NA	NA	NA	NA	NA	NA
chr3	15452751	15457449	-	3	193,142,171	METTL6	hsa_circ_0122464	4698	506	1	Cancer_specific	Exclusively_altered_in_CRC	NA	NA	NA	NA	0.564258	0.0707728	0.148684	None	-0.303664	0.25077	0.466186	None	-0.115601	0.689146	0.861432	None	-0.300495	0.534517	0.737279	None	NA	NA	NA	NA	-1.25158	9.74716e-05	0.000692443	Down
chr3	17051165	17056403	+	2	2487,204	PLCL2	hsa_circ_0001274	5238	2691	1	Cancer_specific	Exclusively_altered_in_GBM	NA	NA	NA	NA	-1.0015	0.00351589	0.0140233	Down	NA	NA	NA	NA	NA	NA	NA	NA	NA	NA	NA	NA	NA	NA	NA	NA	NA	NA	NA	NA
chr3	17549965	17628049	-	3	132,124,205	TBC1D5	hsa_circ_0122769	78084	461	1	Cancer_specific	Exclusively_altered_in_CRC	NA	NA	NA	NA	0.216989	0.547001	0.673593	None	-0.7102	0.0779921	0.211081	None	-0.950497	0.00160518	0.0207335	None	-1.63766	0.0350237	0.161628	None	NA	NA	NA	NA	-1.33631	0.00123127	0.00620179	Down
chr3	24338716	24378862	-	2	146,72	THRB	hsa_circ_0123348	40146	218	1	Cancer_specific	Exclusively_altered_in_GBM	NA	NA	NA	NA	-1.52616	0.000467441	0.00282669	Down	NA	NA	NA	NA	NA	NA	NA	NA	NA	NA	NA	NA	NA	NA	NA	NA	NA	NA	NA	NA
chr3	27420739	27465643	-	17	108,98,132,174,69,252,162,114,162,106,246,134,175,107,147,88,116	SLC4A7	hsa_circ_0064615	44904	2390	1	Cancer_specific	Exclusively_altered_in_GBM	NA	NA	NA	NA	-1.87307	0.000106155	0.000839933	Down	NA	NA	NA	NA	NA	NA	NA	NA	NA	NA	NA	NA	NA	NA	NA	NA	NA	NA	NA	NA
chr3	27420739	27493989	-	23	108,98,132,174,69,252,162,114,162,106,246,134,175,107,147,88,116,372,189,161,139,147,82	SLC4A7	hsa_circ_0064616	73250	3480	1	Cancer_specific	Exclusively_altered_in_GBM	NA	NA	NA	NA	-1.36654	0.00684785	0.0237712	Down	NA	NA	NA	NA	NA	NA	NA	NA	NA	NA	NA	NA	NA	NA	NA	NA	NA	NA	NA	NA
chr3	27424643	27465643	-	17	98,132,174,69,252,162,114,162,106,246,134,175,107,147,88,158,116	SLC4A7	hsa_circ_0064618	41000	2440	1	Cancer_specific	Exclusively_altered_in_GBM	NA	NA	NA	NA	-1.06762	0.0132197	0.0396754	Down	NA	NA	NA	NA	NA	NA	NA	NA	NA	NA	NA	NA	NA	NA	NA	NA	NA	NA	NA	NA
chr3	55768798	56026278	-	5	148,161,136,12,194	ERC2	hsa_circ_0066214	257480	651	1	Cancer_specific	Exclusively_altered_in_GBM	NA	NA	NA	NA	-2.43723	3.22514e-06	5.61406e-05	Down	NA	NA	NA	NA	NA	NA	NA	NA	NA	NA	NA	NA	NA	NA	NA	NA	NA	NA	NA	NA
chr3	55922416	55984588	-	2	161,136	ERC2	hsa_circ_0124264	62172	297	1	Cancer_specific	Exclusively_altered_in_GBM	NA	NA	NA	NA	-2.64805	2.99876e-06	5.25753e-05	Down	NA	NA	NA	NA	NA	NA	NA	NA	NA	NA	NA	NA	NA	NA	NA	NA	NA	NA	NA	NA
chr3	55922416	56026278	-	4	161,136,12,194	ERC2	hsa_circ_0066215	103862	503	1	Cancer_specific	Exclusively_altered_in_GBM	NA	NA	NA	NA	-1.47351	0.000609897	0.00347271	Down	NA	NA	NA	NA	NA	NA	NA	NA	NA	NA	NA	NA	NA	NA	NA	NA	NA	NA	NA	NA
chr3	56658506	56707753	-	22	165,179,109,160,123,923,60,145,404,702,72,73,104,104,106,32,125,162,92,73,93,146	FAM208A	hsa_circ_0124298	49247	4152	1	Cancer_specific	Exclusively_altered_in_GBM	NA	NA	NA	NA	-1.31154	0.00512696	0.0188452	Down	NA	NA	NA	NA	NA	NA	NA	NA	NA	NA	NA	NA	NA	NA	NA	NA	NA	NA	NA	NA
chr3	62423778	62464091	-	6	108,33,84,75,148,156	CADPS	hsa_circ_0124412	40313	604	1	Cancer_specific	Exclusively_altered_in_GBM	NA	NA	NA	NA	-1.71643	0.000217845	0.00150115	Down	NA	NA	NA	NA	NA	NA	NA	NA	NA	NA	NA	NA	NA	NA	NA	NA	NA	NA	NA	NA
chr3	62423778	62467544	-	7	108,33,84,75,148,156,147	CADPS	hsa_circ_0124413	43766	751	1	Cancer_specific	Exclusively_altered_in_GBM	NA	NA	NA	NA	-1.91074	8.99391e-05	0.000750622	Down	NA	NA	NA	NA	NA	NA	NA	NA	NA	NA	NA	NA	NA	NA	NA	NA	NA	NA	NA	NA
chr3	62451041	62467544	-	5	84,75,148,156,147	CADPS	hsa_circ_0124422	16503	610	1	Cancer_specific	Exclusively_altered_in_GBM	NA	NA	NA	NA	-2.1672	1.52805e-07	6.00622e-06	Down	NA	NA	NA	NA	NA	NA	NA	NA	NA	NA	NA	NA	NA	NA	NA	NA	NA	NA	NA	NA
chr3	65415194	65416556	-	2	621,183	MAGI1	hsa_circ_0066452	1362	804	2	circRNA_altered_in_2_cancer_types	Consistently_altered	NA	NA	NA	NA	-1.00668	0.000194016	0.00137048	Down	NA	NA	NA	NA	-0.411526	0.240908	0.539564	None	NA	NA	NA	NA	NA	NA	NA	NA	-1.53491	0.00981645	0.0325186	Down
chr3	66455621	66467690	-	6	81,144,144,144,144,138	LRIG1	hsa_circ_0066474	12069	795	1	Cancer_specific	Exclusively_altered_in_GBM	NA	NA	NA	NA	1.55032	0.00042489	0.00262806	Up	NA	NA	NA	NA	NA	NA	NA	NA	-0.357053	0.573131	0.763494	None	NA	NA	NA	NA	0.0199462	0.952167	0.972746	None
chr3	71739160	71777774	-	6	156,67,61,95,73,148	EIF4E3	hsa_circ_0124571	38614	600	1	Cancer_specific	Exclusively_altered_in_GBM	NA	NA	NA	NA	-1.56071	0.0048565	0.0181523	Down	NA	NA	NA	NA	NA	NA	NA	NA	NA	NA	NA	NA	NA	NA	NA	NA	NA	NA	NA	NA
chr3	77147164	77147491	+	1	327	ROBO2	hsa_circ_0066556	327	327	1	Cancer_specific	Exclusively_altered_in_GBM	NA	NA	NA	NA	-1.70552	0.000343629	0.00223313	Down	NA	NA	NA	NA	NA	NA	NA	NA	NA	NA	NA	NA	NA	NA	NA	NA	NA	NA	NA	NA
chr3	77614104	77651642	+	9	167,122,232,125,172,183,43,128,282	ROBO2	hsa_circ_0124674	37538	1454	1	Cancer_specific	Exclusively_altered_in_GBM	NA	NA	NA	NA	-1.89111	0.000102521	0.000824311	Down	NA	NA	NA	NA	NA	NA	NA	NA	NA	NA	NA	NA	NA	NA	NA	NA	NA	NA	NA	NA
chr3	98487273	98492827	+	4	100,78,104,64	ST3GAL6	hsa_circ_0066608	5554	346	1	Cancer_specific	Exclusively_altered_in_HCC	NA	NA	NA	NA	0.362821	0.315975	0.459973	None	NA	NA	NA	NA	NA	NA	NA	NA	NA	NA	NA	NA	-1.55133	0.000166262	0.00247314	Down	NA	NA	NA	NA
chr3	120871323	120959354	+	7	84,124,79,155,73,148,68	STXBP5L	hsa_circ_0121595	88031	731	1	Cancer_specific	Exclusively_altered_in_GBM	NA	NA	NA	NA	-1.7094	1.9733e-05	0.000225772	Down	NA	NA	NA	NA	NA	NA	NA	NA	NA	NA	NA	NA	NA	NA	NA	NA	NA	NA	NA	NA
chr3	120998651	121037387	+	3	152,72,66	STXBP5L	hsa_circ_0121601	38736	290	1	Cancer_specific	Exclusively_altered_in_GBM	NA	NA	NA	NA	-1.92976	0.000169075	0.00122996	Down	NA	NA	NA	NA	NA	NA	NA	NA	NA	NA	NA	NA	NA	NA	NA	NA	NA	NA	NA	NA
chr3	121097562	121100379	+	2	171,240	STXBP5L	hsa_circ_0121603	2817	411	2	circRNA_altered_in_2_cancer_types	Consistently_altered	NA	NA	NA	NA	-1.88703	3.69845e-07	1.17054e-05	Down	NA	NA	NA	NA	-2.51732	3.05004e-06	0.000140549	Down	NA	NA	NA	NA	NA	NA	NA	NA	NA	NA	NA	NA
chr3	132400757	132411662	-	11	177,116,126,241,128,76,242,190,123,95,165	NPHP3	hsa_circ_0121952	10905	1679	1	Cancer_specific	Exclusively_altered_in_GBM	NA	NA	NA	NA	1.03221	0.0131499	0.0395632	Up	-0.0976269	0.808945	0.896638	None	0.658247	0.0977396	0.343238	None	-1.38631	0.141215	0.354746	None	NA	NA	NA	NA	NA	NA	NA	NA
chr3	141712379	141811969	-	4	48,122,104,102	TFDP2	hsa_circ_0122212	99590	376	1	Cancer_specific	Exclusively_altered_in_GBM	NA	NA	NA	NA	-1.10067	0.0112894	0.0348256	Down	NA	NA	NA	NA	NA	NA	NA	NA	NA	NA	NA	NA	NA	NA	NA	NA	NA	NA	NA	NA
chr3	149563797	149619949	+	5	130,81,126,88,91	RNF13	hsa_circ_0004565	56152	516	1	Cancer_specific	Exclusively_altered_in_CRC	NA	NA	NA	NA	0.0135007	0.970508	0.979349	None	0.259007	0.503885	0.716758	None	-0.34588	0.375767	0.657111	None	NA	NA	NA	NA	0.0692729	0.84338	0.918881	None	1.04881	0.00304014	0.012372	Up
chr3	153935657	153958368	+	3	90,155,210	ARHGEF26	hsa_circ_0067745	22711	455	4	circRNA_altered_in_4_cancer_types	Inconsistently_altered	NA	NA	NA	NA	1.23364	3.8103e-06	6.23202e-05	Up	-1.44288	0.00865435	0.048345	Down	NA	NA	NA	NA	-3.38088	0.000328232	0.0120288	Down	-0.158892	0.772813	0.873083	None	-2.3884	5.41172e-05	0.000410556	Down
chr3	159482231	159482927	+	1	696	IQCJ-SCHIP1	hsa_circ_0122561	696	696	1	Cancer_specific	Exclusively_altered_in_GBM	NA	NA	NA	NA	-1.49003	0.00469409	0.0177082	Down	NA	NA	NA	NA	NA	NA	NA	NA	NA	NA	NA	NA	NA	NA	NA	NA	NA	NA	NA	NA
chr3	173322068	173322881	+	1	813	NLGN1	hsa_circ_0003046	813	813	1	Cancer_specific	Exclusively_altered_in_GBM	NA	NA	NA	NA	1.99587	5.3766e-07	1.51691e-05	Up	NA	NA	NA	NA	NA	NA	NA	NA	NA	NA	NA	NA	NA	NA	NA	NA	NA	NA	NA	NA
chr3	179131199	179144030	-	7	202,67,163,64,107,39,99	GNB4	hsa_circ_0005009	12831	741	1	Cancer_specific	Exclusively_altered_in_GBM	NA	NA	NA	NA	1.49906	0.000233416	0.00159785	Up	NA	NA	NA	NA	NA	NA	NA	NA	NA	NA	NA	NA	NA	NA	NA	NA	NA	NA	NA	NA
chr3	179576849	179597911	-	4	96,97,124,195	PEX5L	hsa_circ_0122853	21062	512	1	Cancer_specific	Exclusively_altered_in_GBM	NA	NA	NA	NA	-1.75822	4.37649e-08	2.80672e-06	Down	NA	NA	NA	NA	NA	NA	NA	NA	NA	NA	NA	NA	NA	NA	NA	NA	NA	NA	NA	NA
chr3	179576849	179605572	-	5	96,97,124,195,112	PEX5L	hsa_circ_0068122	28723	624	1	Cancer_specific	Exclusively_altered_in_GBM	NA	NA	NA	NA	-1.47995	0.000871081	0.00464513	Down	NA	NA	NA	NA	NA	NA	NA	NA	NA	NA	NA	NA	NA	NA	NA	NA	NA	NA	NA	NA
chr3	183368083	183382827	+	3	981,185,119	KLHL24	hsa_circ_0122953	14744	1285	1	Cancer_specific	Exclusively_altered_in_CRC	NA	NA	NA	NA	-0.746552	0.0523089	0.117274	None	NA	NA	NA	NA	NA	NA	NA	NA	NA	NA	NA	NA	NA	NA	NA	NA	-1.63543	0.00536805	0.0198118	Down
chr3	196802707	196846401	-	7	34,67,177,115,103,157,121	DLG1	hsa_circ_0123239	43694	774	1	Cancer_specific	Exclusively_altered_in_GBM	NA	NA	NA	NA	-1.10266	0.00273576	0.0117585	Down	NA	NA	NA	NA	NA	NA	NA	NA	NA	NA	NA	NA	NA	NA	NA	NA	NA	NA	NA	NA
chr3	197557640	197593090	+	11	94,121,149,77,52,150,60,54,72,49,108	LRCH3	hsa_circ_0068738	35450	986	1	Cancer_specific	Exclusively_altered_in_CRC	NA	NA	NA	NA	-0.19642	0.566985	0.689492	None	NA	NA	NA	NA	NA	NA	NA	NA	NA	NA	NA	NA	NA	NA	NA	NA	-1.45861	0.0124517	0.0399558	Down
chr2	1842920	1896059	-	7	222,84,63,69,122,237,251	MYT1L	hsa_circ_0052454	53139	1048	1	Cancer_specific	Exclusively_altered_in_GBM	NA	NA	NA	NA	-1.74307	0.000135594	0.00102622	Down	NA	NA	NA	NA	NA	NA	NA	NA	NA	NA	NA	NA	NA	NA	NA	NA	NA	NA	NA	NA
chr2	24362239	24369956	+	3	81,88,157	FAM228B	hsa_circ_0008073	7717	326	1	Cancer_specific	Exclusively_altered_in_THCA	NA	NA	NA	NA	0.315142	0.365992	0.508493	None	NA	NA	NA	NA	-1.77885	0.00501883	0.0486199	Down	-0.994169	0.192294	0.42088	None	NA	NA	NA	NA	NA	NA	NA	NA
chr2	30748452	30791042	+	4	169,199,147,117	LCLAT1	hsa_circ_0053375	42590	632	1	Cancer_specific	Exclusively_altered_in_GBM	NA	NA	NA	NA	-1.5911	0.00033437	0.00218461	Down	NA	NA	NA	NA	NA	NA	NA	NA	NA	NA	NA	NA	NA	NA	NA	NA	NA	NA	NA	NA
chr2	32703702	32718734	+	10	184,156,134,154,117,155,127,111,134,128	BIRC6	hsa_circ_0003288	15032	1400	1	Cancer_specific	Exclusively_altered_in_LUAD	NA	NA	NA	NA	-0.14439	0.629119	0.739944	None	-1.17171	0.00649494	0.038162	Down	0.115535	0.70298	0.870473	None	-0.13923	0.804323	0.907967	None	NA	NA	NA	NA	0.476585	0.168463	0.300997	None
chr2	36808432	36818154	-	4	142,86,117,109	FEZ2	hsa_circ_0119887	9722	454	1	Cancer_specific	Exclusively_altered_in_GBM	NA	NA	NA	NA	-1.31021	0.00925283	0.029906	Down	NA	NA	NA	NA	NA	NA	NA	NA	NA	NA	NA	NA	NA	NA	NA	NA	NA	NA	NA	NA
chr2	39564060	39564722	-	2	48,56	MAP4K3	hsa_circ_0054214	662	104	1	Cancer_specific	Exclusively_altered_in_GBM	NA	NA	NA	NA	1.01776	0.00324937	0.0132199	Up	-0.151736	0.535734	0.737284	None	0.262657	0.362002	0.652445	None	-0.274263	0.55551	0.753446	None	-0.210066	0.53982	0.712003	None	-0.406503	0.222651	0.368288	None
chr2	40366540	40405633	-	6	276,100,131,18,104,107	SLC8A1	hsa_circ_0120050	39093	736	1	Cancer_specific	Exclusively_altered_in_GBM	NA	NA	NA	NA	-1.98878	6.34987e-09	6.18985e-07	Down	NA	NA	NA	NA	NA	NA	NA	NA	NA	NA	NA	NA	NA	NA	NA	NA	NA	NA	NA	NA
chr2	40387904	40405633	-	5	100,131,18,104,107	SLC8A1	hsa_circ_0054227	17729	460	1	Cancer_specific	Exclusively_altered_in_GBM	NA	NA	NA	NA	-1.88907	1.54512e-06	3.13789e-05	Down	NA	NA	NA	NA	NA	NA	NA	NA	NA	NA	NA	NA	NA	NA	NA	NA	NA	NA	NA	NA
chr2	48573339	48573890	+	1	551	FOXN2	hsa_circ_0001002	551	551	1	Cancer_specific	Exclusively_altered_in_GBM	NA	NA	NA	NA	1.5116	0.000464731	0.00281729	Up	NA	NA	NA	NA	NA	NA	NA	NA	NA	NA	NA	NA	-0.474086	0.241666	0.455677	None	NA	NA	NA	NA
chr2	50692579	50758568	-	7	120,174,191,382,123,27,204	NRXN1	hsa_circ_0120251	65989	1221	1	Cancer_specific	Exclusively_altered_in_GBM	NA	NA	NA	NA	-1.06458	0.0092164	0.0298279	Down	NA	NA	NA	NA	NA	NA	NA	NA	NA	NA	NA	NA	NA	NA	NA	NA	NA	NA	NA	NA
chr2	51149018	51149795	-	1	777	NRXN1	hsa_circ_0120291	777	777	1	Cancer_specific	Exclusively_altered_in_GBM	NA	NA	NA	NA	-2.12709	0.00108598	0.00559522	Down	NA	NA	NA	NA	NA	NA	NA	NA	NA	NA	NA	NA	NA	NA	NA	NA	NA	NA	NA	NA
chr2	53921020	53978078	-	7	131,258,198,178,136,113,159	ASB3	hsa_circ_0001005	57058	1173	1	Cancer_specific	Exclusively_altered_in_GBM	NA	NA	NA	NA	1.03436	0.0147218	0.0432253	Up	NA	NA	NA	NA	NA	NA	NA	NA	NA	NA	NA	NA	NA	NA	NA	NA	NA	NA	NA	NA
chr2	58275961	58316858	+	6	141,50,70,88,106,93	VRK2	hsa_circ_0120478	40897	548	1	Cancer_specific	Exclusively_altered_in_GBM	NA	NA	NA	NA	-2.75417	6.09129e-14	4.94816e-11	Down	NA	NA	NA	NA	NA	NA	NA	NA	NA	NA	NA	NA	NA	NA	NA	NA	NA	NA	NA	NA
chr2	61710091	61717911	-	6	135,169,195,107,184,135	XPO1	hsa_circ_0002607	7820	925	1	Cancer_specific	Exclusively_altered_in_GBM	NA	NA	NA	NA	1.247	0.0031434	0.01294	Up	NA	NA	NA	NA	0.0532379	0.896539	0.961382	None	NA	NA	NA	NA	NA	NA	NA	NA	NA	NA	NA	NA
chr2	86479079	86509365	-	4	114,121,77,73	REEP1	hsa_circ_0121117	30286	385	1	Cancer_specific	Exclusively_altered_in_GBM	NA	NA	NA	NA	-1.25997	0.00230922	0.0103638	Down	NA	NA	NA	NA	NA	NA	NA	NA	NA	NA	NA	NA	NA	NA	NA	NA	NA	NA	NA	NA
chr2	107446521	107460490	-	4	175,102,98,1000	ST6GAL2	hsa_circ_0055954	13969	1375	1	Cancer_specific	Exclusively_altered_in_GBM	NA	NA	NA	NA	-1.80203	3.4587e-06	5.81301e-05	Down	NA	NA	NA	NA	0.00378034	0.989949	0.995972	None	NA	NA	NA	NA	NA	NA	NA	NA	NA	NA	NA	NA
chr2	110919179	110920712	-	2	95,88	NPHP1	hsa_circ_0056019	1533	183	1	Cancer_specific	Exclusively_altered_in_GBM	NA	NA	NA	NA	1.41455	1.1013e-06	2.44976e-05	Up	0.283617	0.338834	0.564977	None	0.110394	0.592925	0.808104	None	-0.485598	0.385015	0.611588	None	NA	NA	NA	NA	-0.371158	0.349815	0.513167	None
chr2	114486977	114493435	-	4	105,65,88,82	SLC35F5	hsa_circ_0008827	6458	340	1	Cancer_specific	Exclusively_altered_in_GBM	NA	NA	NA	NA	1.44403	0.000218058	0.00150115	Up	0.550806	0.177592	0.364836	None	-0.22108	0.513018	0.757969	None	0.179324	0.729887	0.873901	None	NA	NA	NA	NA	NA	NA	NA	NA
chr2	120677644	120692534	+	4	173,69,126,159	PTPN4	hsa_circ_0056245	14890	527	1	Cancer_specific	Exclusively_altered_in_THCA	NA	NA	NA	NA	-0.123842	0.71746	0.806481	None	NA	NA	NA	NA	-1.04045	0.00477356	0.0465081	Down	0.15561	0.861312	0.932132	None	NA	NA	NA	NA	NA	NA	NA	NA
chr2	124979281	124999970	+	2	105,194	CNTNAP5	hsa_circ_0117236	20689	299	1	Cancer_specific	Exclusively_altered_in_GBM	NA	NA	NA	NA	-2.06918	5.59522e-05	0.000507284	Down	NA	NA	NA	NA	NA	NA	NA	NA	NA	NA	NA	NA	NA	NA	NA	NA	NA	NA	NA	NA
chr2	125530375	125555897	+	3	219,240,225	CNTNAP5	hsa_circ_0117248	25522	684	1	Cancer_specific	Exclusively_altered_in_GBM	NA	NA	NA	NA	-2.34186	1.07647e-06	2.44976e-05	Down	NA	NA	NA	NA	NA	NA	NA	NA	NA	NA	NA	NA	NA	NA	NA	NA	NA	NA	NA	NA
chr2	125530375	125627339	+	5	219,240,225,131,88	CNTNAP5	hsa_circ_0117249	96964	903	1	Cancer_specific	Exclusively_altered_in_GBM	NA	NA	NA	NA	-2.29772	2.57854e-05	0.000272872	Down	NA	NA	NA	NA	NA	NA	NA	NA	NA	NA	NA	NA	NA	NA	NA	NA	NA	NA	NA	NA
chr2	136389287	136437894	+	12	60,141,109,96,38,51,227,149,303,124,155,152	R3HDM1	hsa_circ_0056567	48607	1605	1	Cancer_specific	Exclusively_altered_in_GBM	NA	NA	NA	NA	-1.0665	0.0168607	0.0480578	Down	NA	NA	NA	NA	NA	NA	NA	NA	NA	NA	NA	NA	NA	NA	NA	NA	NA	NA	NA	NA
chr2	136467002	136467801	+	2	104,173	R3HDM1	hsa_circ_0056586	799	277	1	Cancer_specific	Exclusively_altered_in_GBM	NA	NA	NA	NA	-1.06712	0.00806729	0.0268213	Down	NA	NA	NA	NA	NA	NA	NA	NA	NA	NA	NA	NA	NA	NA	NA	NA	NA	NA	NA	NA
chr2	162804075	162821683	+	7	162,114,162,252,69,174,123	SLC4A10	hsa_circ_0117841	17608	1056	1	Cancer_specific	Exclusively_altered_in_GBM	NA	NA	NA	NA	-2.67645	1.38595e-09	2.11098e-07	Down	NA	NA	NA	NA	NA	NA	NA	NA	NA	NA	NA	NA	NA	NA	NA	NA	NA	NA	NA	NA
chr2	163360952	163374668	-	3	215,21,429	KCNH7	hsa_circ_0117881	13716	665	1	Cancer_specific	Exclusively_altered_in_GBM	NA	NA	NA	NA	-2.02908	2.87281e-07	1.00015e-05	Down	NA	NA	NA	NA	NA	NA	NA	NA	NA	NA	NA	NA	NA	NA	NA	NA	NA	NA	NA	NA
chr2	168869143	168986268	-	8	69,53,71,63,30,123,66,49	STK39	hsa_circ_0002787	117125	524	1	Cancer_specific	Exclusively_altered_in_GBM	NA	NA	NA	NA	-1.65483	1.25966e-05	0.000160722	Down	NA	NA	NA	NA	NA	NA	NA	NA	NA	NA	NA	NA	NA	NA	NA	NA	NA	NA	NA	NA
chr2	172305190	172333460	+	7	137,79,90,105,143,110,91	DCAF17	hsa_circ_0057051	28270	755	1	Cancer_specific	Exclusively_altered_in_CRC	NA	NA	NA	NA	-0.242378	0.344438	0.488588	None	NA	NA	NA	NA	0.0444191	0.885296	0.957512	None	NA	NA	NA	NA	NA	NA	NA	NA	-1.12802	0.00718268	0.0249365	Down
chr2	180815238	180815653	-	2	221,102	CWC22	hsa_circ_0118236	415	323	1	Cancer_specific	Exclusively_altered_in_GBM	NA	NA	NA	NA	-2.11294	1.15856e-07	5.22853e-06	Down	NA	NA	NA	NA	NA	NA	NA	NA	NA	NA	NA	NA	NA	NA	NA	NA	NA	NA	NA	NA
chr2	190656515	190670480	+	3	152,183,103	PMS1	hsa_circ_0004776	13965	438	1	Cancer_specific	Exclusively_altered_in_GBM	NA	NA	NA	NA	1.1734	0.0024053	0.0106577	Up	NA	NA	NA	NA	0.504707	0.248399	0.544371	None	0.664413	0.28703	0.529574	None	NA	NA	NA	NA	NA	NA	NA	NA
chr2	196544755	196583056	+	7	1019,208,170,189,121,369,81	SLC39A10	hsa_circ_0057552	38301	2157	1	Cancer_specific	Exclusively_altered_in_GBM	NA	NA	NA	NA	-1.35513	0.0011889	0.00603615	Down	NA	NA	NA	NA	0.531645	0.0859147	0.319138	None	NA	NA	NA	NA	NA	NA	NA	NA	NA	NA	NA	NA
chr2	196544755	196593073	+	8	1019,208,170,189,121,369,81,191	SLC39A10	hsa_circ_0057553	48318	2348	2	circRNA_altered_in_2_cancer_types	Inconsistently_altered	NA	NA	NA	NA	-1.61561	0.000151168	0.00112108	Down	NA	NA	NA	NA	1.06112	9.73136e-05	0.0023148	Up	NA	NA	NA	NA	NA	NA	NA	NA	NA	NA	NA	NA
chr2	197135916	197172809	-	7	97,103,135,186,125,104,151	HECW2	hsa_circ_0057582	36893	901	1	Cancer_specific	Exclusively_altered_in_GBM	NA	NA	NA	NA	-1.62235	0.000740971	0.0040854	Down	-0.610896	0.141374	0.316834	None	NA	NA	NA	NA	NA	NA	NA	NA	NA	NA	NA	NA	NA	NA	NA	NA
chr2	197755551	197763093	-	5	84,56,106,67,53	PGAP1	hsa_circ_0057607	7542	366	1	Cancer_specific	Exclusively_altered_in_GBM	NA	NA	NA	NA	1.40881	0.00425155	0.0163423	Up	NA	NA	NA	NA	NA	NA	NA	NA	NA	NA	NA	NA	NA	NA	NA	NA	NA	NA	NA	NA
chr2	198948481	198953785	+	2	2475,204	PLCL1	hsa_circ_0057682	5304	2679	1	Cancer_specific	Exclusively_altered_in_GBM	NA	NA	NA	NA	-2.27655	1.12618e-05	0.000148351	Down	NA	NA	NA	NA	NA	NA	NA	NA	NA	NA	NA	NA	NA	NA	NA	NA	NA	NA	NA	NA
chr2	200173482	200246543	-	7	198,156,213,473,103,124,127	SATB2	hsa_circ_0006011	73061	1394	1	Cancer_specific	Exclusively_altered_in_GBM	NA	NA	NA	NA	-1.37042	2.31169e-05	0.000250381	Down	NA	NA	NA	NA	NA	NA	NA	NA	NA	NA	NA	NA	NA	NA	NA	NA	NA	NA	NA	NA
chr2	200188525	200246543	-	6	156,213,473,103,124,127	SATB2	hsa_circ_0057687	58018	1196	1	Cancer_specific	Exclusively_altered_in_GBM	NA	NA	NA	NA	-1.14674	0.000112239	0.000877327	Down	NA	NA	NA	NA	NA	NA	NA	NA	NA	NA	NA	NA	NA	NA	NA	NA	0.332812	0.503192	0.668565	None
chr2	200188525	200298237	-	7	156,213,473,103,124,127,177	SATB2	hsa_circ_0008265	109712	1373	1	Cancer_specific	Exclusively_altered_in_HCC	NA	NA	NA	NA	-0.905805	0.00108316	0.00559249	None	NA	NA	NA	NA	NA	NA	NA	NA	NA	NA	NA	NA	2.93346	6.50173e-05	0.00139267	Up	1.46438	0.0208238	0.0592418	None
chr2	200213423	200298237	-	5	473,103,124,127,177	SATB2	hsa_circ_0008928	84814	1004	1	Cancer_specific	Exclusively_altered_in_GBM	NA	NA	NA	NA	-1.04733	4.01563e-05	0.0003946	Down	NA	NA	NA	NA	NA	NA	NA	NA	NA	NA	NA	NA	NA	NA	NA	NA	1.0227	0.0276088	0.0739243	None
chr2	200233327	200298237	-	4	103,124,127,177	SATB2	hsa_circ_0003915	64910	531	1	Cancer_specific	Exclusively_altered_in_HCC	NA	NA	NA	NA	-0.931972	0.0012009	0.00607176	None	NA	NA	NA	NA	NA	NA	NA	NA	NA	NA	NA	NA	2.35053	5.03262e-05	0.00117172	Up	0.964973	0.0587318	0.134667	None
chr2	200245086	200298237	-	3	124,127,177	SATB2	hsa_circ_0002867	53151	428	1	Cancer_specific	Exclusively_altered_in_GBM	NA	NA	NA	NA	-1.92971	5.47755e-07	1.51691e-05	Down	NA	NA	NA	NA	NA	NA	NA	NA	NA	NA	NA	NA	NA	NA	NA	NA	NA	NA	NA	NA
chr2	203650640	203684622	-	8	90,258,75,44,83,99,126,199	ICA1L	hsa_circ_0057822	33982	974	1	Cancer_specific	Exclusively_altered_in_GBM	NA	NA	NA	NA	-1.01503	0.00839295	0.0277524	Down	NA	NA	NA	NA	NA	NA	NA	NA	NA	NA	NA	NA	NA	NA	NA	NA	NA	NA	NA	NA
chr2	206023445	206058044	+	5	186,171,133,100,116	PARD3B	hsa_circ_0008172	34599	706	4	circRNA_altered_in_4_cancer_types	Inconsistently_altered	NA	NA	NA	NA	2.14838	7.40052e-06	0.000105468	Up	-1.41403	0.00385661	0.0265877	Down	-0.357321	0.392511	0.666706	None	-2.59655	0.000856392	0.0200257	Down	NA	NA	NA	NA	-2.57168	8.75306e-07	1.22244e-05	Down
chr2	212483901	212495319	-	3	99,123,133	ERBB4	hsa_circ_0119030	11418	355	1	Cancer_specific	Exclusively_altered_in_GBM	NA	NA	NA	NA	1.44978	9.2599e-05	0.000764962	Up	NA	NA	NA	NA	NA	NA	NA	NA	NA	NA	NA	NA	NA	NA	NA	NA	NA	NA	NA	NA
chr2	221495099	221498849	+	3	182,151,197	AC067956.1	hsa_circ_0119190	3750	530	1	Cancer_specific	Exclusively_altered_in_GBM	NA	NA	NA	NA	-2.10045	1.96798e-07	7.15816e-06	Down	NA	NA	NA	NA	NA	NA	NA	NA	NA	NA	NA	NA	NA	NA	NA	NA	NA	NA	NA	NA
chr2	224862831	224866639	-	2	228,281	SERPINE2	hsa_circ_0001103	3808	509	2	circRNA_altered_in_2_cancer_types	Consistently_altered	NA	NA	NA	NA	1.11116	0.000185249	0.00131236	Up	NA	NA	NA	NA	NA	NA	NA	NA	NA	NA	NA	NA	NA	NA	NA	NA	1.91339	2.84108e-06	3.42322e-05	Up
chr2	232153372	232156156	+	2	62,91	ARMC9	hsa_circ_0006604	2784	153	1	Cancer_specific	Exclusively_altered_in_GBM	NA	NA	NA	NA	-1.15508	0.0128737	0.0389729	Down	NA	NA	NA	NA	NA	NA	NA	NA	NA	NA	NA	NA	NA	NA	NA	NA	NA	NA	NA	NA
chr2	236649606	236659132	+	3	86,142,135	AGAP1	hsa_circ_0005003	9526	363	2	circRNA_altered_in_2_cancer_types	Consistently_altered	NA	NA	NA	NA	-1.58834	3.55954e-06	5.90108e-05	Down	NA	NA	NA	NA	NA	NA	NA	NA	-1.87178	0.0232721	0.13073	None	NA	NA	NA	NA	-2.10146	0.0044032	0.0168583	Down
chr1	14042035	14075982	+	5	74,118,104,153,127	PRDM2	hsa_circ_0110660	33947	576	1	Cancer_specific	Exclusively_altered_in_GBM	NA	NA	NA	NA	-1.15544	0.0030802	0.0127661	Down	NA	NA	NA	NA	-0.602671	0.125937	0.395841	None	NA	NA	NA	NA	NA	NA	NA	NA	NA	NA	NA	NA
chr1	16263657	16264501	+	2	483,195	SPEN	hsa_circ_0010117	844	678	1	Cancer_specific	Exclusively_altered_in_LUAD	NA	NA	NA	NA	0.792677	0.017242	0.0486329	None	-1.04968	0.00498485	0.0319369	Down	-0.130732	0.690837	0.86163	None	0.401274	0.385002	0.611588	None	-0.366601	0.34818	0.563167	None	NA	NA	NA	NA
chr1	21231375	21268823	-	2	89,840	EIF4G3	hsa_circ_0111887	37448	929	1	Cancer_specific	Exclusively_altered_in_GBM	NA	NA	NA	NA	-1.12258	0.000136785	0.00103119	Down	NA	NA	NA	NA	NA	NA	NA	NA	NA	NA	NA	NA	NA	NA	NA	NA	NA	NA	NA	NA
chr1	23376879	23385660	+	6	134,79,93,107,82,95	KDM1A	hsa_circ_0003889	8781	590	1	Cancer_specific	Exclusively_altered_in_GBM	NA	NA	NA	NA	-1.12982	0.000180878	0.00129267	Down	NA	NA	NA	NA	NA	NA	NA	NA	NA	NA	NA	NA	NA	NA	NA	NA	NA	NA	NA	NA
chr1	24140679	24147083	-	4	149,96,108,84	HMGCL	hsa_circ_0003757	6404	437	1	Cancer_specific	Exclusively_altered_in_HCC	NA	NA	NA	NA	0.733705	0.0267404	0.0690321	None	NA	NA	NA	NA	-0.199991	0.465442	0.728722	None	0.312121	0.508812	0.715559	None	-1.21065	2.78567e-05	0.000727671	Down	-0.106748	0.762689	0.865052	None
chr1	47745912	47748131	-	2	969,115	STIL	hsa_circ_0000069	2219	1084	1	Cancer_specific	Exclusively_altered_in_CRC	NA	NA	NA	NA	0.273521	0.440022	0.582455	None	NA	NA	NA	NA	NA	NA	NA	NA	NA	NA	NA	NA	NA	NA	NA	NA	1.67013	1.58044e-06	2.04459e-05	Up
chr1	51121113	51210447	-	4	87,106,92,92	FAF1	hsa_circ_0004619	89334	377	1	Cancer_specific	Exclusively_altered_in_GBM	NA	NA	NA	NA	-1.4093	4.78911e-06	7.57861e-05	Down	NA	NA	NA	NA	NA	NA	NA	NA	-1.4855	0.021732	0.126565	None	NA	NA	NA	NA	NA	NA	NA	NA
chr1	53407467	53427301	+	5	58,72,132,65,127	SCP2	hsa_circ_0113620	19834	454	2	circRNA_altered_in_2_cancer_types	Consistently_altered	NA	NA	NA	NA	-1.31173	0.0119258	0.0365034	Down	NA	NA	NA	NA	NA	NA	NA	NA	NA	NA	NA	NA	-2.06026	7.33272e-05	0.00151026	Down	NA	NA	NA	NA
chr1	54059780	54065951	-	2	883,178	GLIS1	hsa_circ_0002079	6171	1061	1	Cancer_specific	Exclusively_altered_in_GBM	NA	NA	NA	NA	-1.25123	0.00452986	0.0171951	Down	NA	NA	NA	NA	NA	NA	NA	NA	NA	NA	NA	NA	NA	NA	NA	NA	NA	NA	NA	NA
chr1	54266365	54298264	-	9	156,82,93,136,52,109,139,175,102	NDC1	hsa_circ_0009070	31899	1044	1	Cancer_specific	Exclusively_altered_in_GBM	NA	NA	NA	NA	-1.10556	0.00364581	0.0144469	Down	NA	NA	NA	NA	NA	NA	NA	NA	NA	NA	NA	NA	NA	NA	NA	NA	NA	NA	NA	NA
chr1	55589119	55600086	-	8	156,160,229,96,98,156,94,86	USP24	hsa_circ_0012697	10967	1075	1	Cancer_specific	Exclusively_altered_in_GBM	NA	NA	NA	NA	-1.36265	0.000476136	0.00286505	Down	NA	NA	NA	NA	NA	NA	NA	NA	NA	NA	NA	NA	NA	NA	NA	NA	NA	NA	NA	NA
chr1	59137541	59160879	-	11	89,78,104,131,761,99,79,24,78,71,79	MYSM1	hsa_circ_0113710	23338	1593	1	Cancer_specific	Exclusively_altered_in_GBM	NA	NA	NA	NA	-1.54784	0.00103378	0.00538319	Down	NA	NA	NA	NA	NA	NA	NA	NA	NA	NA	NA	NA	NA	NA	NA	NA	NA	NA	NA	NA
chr1	65095037	65107652	+	4	127,145,217,150	CACHD1	hsa_circ_0113889	12615	639	1	Cancer_specific	Exclusively_altered_in_GBM	NA	NA	NA	NA	1.03186	0.00332878	0.0134086	Up	NA	NA	NA	NA	NA	NA	NA	NA	NA	NA	NA	NA	NA	NA	NA	NA	NA	NA	NA	NA
chr1	70518708	70573509	+	4	120,222,93,75	LRRC7	hsa_circ_0114014	54801	510	1	Cancer_specific	Exclusively_altered_in_GBM	NA	NA	NA	NA	-1.51166	0.000241207	0.00163738	Down	NA	NA	NA	NA	NA	NA	NA	NA	NA	NA	NA	NA	NA	NA	NA	NA	NA	NA	NA	NA
chr1	76205664	76216231	+	4	131,109,141,96	ACADM	hsa_circ_0008129	10567	477	1	Cancer_specific	Exclusively_altered_in_HCC	NA	NA	NA	NA	-0.429474	0.103086	0.198969	None	NA	NA	NA	NA	NA	NA	NA	NA	NA	NA	NA	NA	-2.11994	2.02741e-06	8.68542e-05	Down	NA	NA	NA	NA
chr1	84644859	84650865	+	4	62,129,99,83	PRKACB	hsa_circ_0114304	6006	373	1	Cancer_specific	Exclusively_altered_in_GBM	NA	NA	NA	NA	-1.18474	0.00451525	0.0171932	Down	NA	NA	NA	NA	NA	NA	NA	NA	NA	NA	NA	NA	NA	NA	NA	NA	NA	NA	NA	NA
chr1	84644859	84663507	+	6	62,129,99,83,127,96	PRKACB	hsa_circ_0114305	18648	596	1	Cancer_specific	Exclusively_altered_in_GBM	NA	NA	NA	NA	-1.71753	8.02584e-06	0.000111766	Down	NA	NA	NA	NA	NA	NA	NA	NA	NA	NA	NA	NA	NA	NA	NA	NA	NA	NA	NA	NA
chr1	84644859	84680000	+	8	62,129,99,83,127,96,123,165	PRKACB	hsa_circ_0004083	35141	884	1	Cancer_specific	Exclusively_altered_in_CRC	NA	NA	NA	NA	-0.808864	2.23667e-05	0.00024553	None	NA	NA	NA	NA	-0.662981	0.0627388	0.26154	None	-1.33297	0.020798	0.125553	None	NA	NA	NA	NA	-1.17513	0.00506607	0.0189823	Down
chr1	86578249	86611866	-	4	54,54,1370,65	COL24A1	hsa_circ_0114349	33617	1543	1	Cancer_specific	Exclusively_altered_in_GBM	NA	NA	NA	NA	-2.85614	1.15734e-08	9.72561e-07	Down	NA	NA	NA	NA	NA	NA	NA	NA	NA	NA	NA	NA	NA	NA	NA	NA	NA	NA	NA	NA
chr1	93070863	93101893	-	5	96,147,159,141,135	EVI5	hsa_circ_0013167	31030	678	1	Cancer_specific	Exclusively_altered_in_HCC	NA	NA	NA	NA	0.364098	0.295841	0.437744	None	NA	NA	NA	NA	0.547238	0.0933414	0.337176	None	-0.48876	0.281909	0.52223	None	-1.0363	0.00543741	0.0352685	Down	NA	NA	NA	NA
chr1	94953097	94956803	+	6	70,98,92,92,73,64	ABCD3	hsa_circ_0013235	3706	489	1	Cancer_specific	Exclusively_altered_in_GBM	NA	NA	NA	NA	1.20384	0.00546801	0.0197415	Up	NA	NA	NA	NA	-1.02746	0.00626136	0.0564847	None	0.199794	0.801833	0.907967	None	0.020036	0.963904	0.987886	None	NA	NA	NA	NA
chr1	95609446	95639445	+	5	166,90,59,95,74	TMEM56	hsa_circ_0005720	29999	484	1	Cancer_specific	Exclusively_altered_in_HCC	NA	NA	NA	NA	-0.601295	0.0575071	0.126599	None	1.01851	0.0164507	0.0755082	None	0.203191	0.553717	0.783859	None	-1.24534	0.0105327	0.0886741	None	-1.36933	1.15887e-06	5.6416e-05	Down	0.0611921	0.820311	0.89774	None
chr1	97981281	98015300	-	2	216,185	DPYD	hsa_circ_0006323	34019	401	1	Cancer_specific	Exclusively_altered_in_CRC	NA	NA	NA	NA	-0.0636857	0.87921	0.915288	None	-0.499701	0.147411	0.32271	None	0.327591	0.356815	0.649167	None	NA	NA	NA	NA	-0.843352	0.0163969	0.076686	None	-1.42988	0.000585849	0.00325796	Down
chr1	99418625	99422297	-	2	251,133	LPPR5	hsa_circ_0013270	3672	384	1	Cancer_specific	Exclusively_altered_in_GBM	NA	NA	NA	NA	-1.04649	0.0132386	0.0396832	Down	NA	NA	NA	NA	NA	NA	NA	NA	NA	NA	NA	NA	NA	NA	NA	NA	NA	NA	NA	NA
chr1	99753520	99767453	+	5	186,130,196,58,174	LPPR4	hsa_circ_0114651	13933	744	1	Cancer_specific	Exclusively_altered_in_GBM	NA	NA	NA	NA	-1.65082	0.000255932	0.00172772	Down	NA	NA	NA	NA	NA	NA	NA	NA	NA	NA	NA	NA	NA	NA	NA	NA	NA	NA	NA	NA
chr1	101379218	101440458	+	6	144,51,136,91,150,93	SLC30A7	hsa_circ_0110181	61240	665	1	Cancer_specific	Exclusively_altered_in_GBM	NA	NA	NA	NA	-1.86137	2.17609e-05	0.000240011	Down	NA	NA	NA	NA	NA	NA	NA	NA	NA	NA	NA	NA	NA	NA	NA	NA	NA	NA	NA	NA
chr1	107866903	107867544	+	1	641	NTNG1	hsa_circ_0002286	641	641	1	Cancer_specific	Exclusively_altered_in_LUAD	NA	NA	NA	NA	-0.274443	0.43189	0.574964	None	-1.97811	4.92816e-07	1.80275e-05	Down	NA	NA	NA	NA	NA	NA	NA	NA	NA	NA	NA	NA	NA	NA	NA	NA
chr1	109427896	109446876	+	9	304,222,136,143,124,116,156,109,130	GPSM2	hsa_circ_0013386	18980	1440	1	Cancer_specific	Exclusively_altered_in_GBM	NA	NA	NA	NA	1.20116	0.0038527	0.0150465	Up	NA	NA	NA	NA	NA	NA	NA	NA	-1.8152	0.136875	0.350437	None	NA	NA	NA	NA	NA	NA	NA	NA
chr1	144994590	145021167	-	3	111,152,56	PDE4DIP	hsa_circ_0008390	26577	319	1	Cancer_specific	Exclusively_altered_in_GBM	NA	NA	NA	NA	-1.43143	1.21305e-06	2.6161e-05	Down	NA	NA	NA	NA	NA	NA	NA	NA	NA	NA	NA	NA	NA	NA	NA	NA	NA	NA	NA	NA
chr1	155640110	155649303	-	5	145,172,87,199,104	YY1AP1	hsa_circ_0110887	9193	707	1	Cancer_specific	Exclusively_altered_in_CRC	NA	NA	NA	NA	-0.399605	0.0840926	0.170494	None	-0.81584	0.0237083	0.0953378	None	0.105854	0.730269	0.884938	None	-0.911792	0.0553184	0.208448	None	NA	NA	NA	NA	-1.12742	0.00241349	0.0104148	Down
chr1	172356272	172357949	+	2	227,237	DNM3	hsa_circ_0111165	1677	464	1	Cancer_specific	Exclusively_altered_in_GBM	NA	NA	NA	NA	-1.24988	1.02411e-05	0.00013638	Down	NA	NA	NA	NA	NA	NA	NA	NA	NA	NA	NA	NA	NA	NA	NA	NA	NA	NA	NA	NA
chr1	178425855	178436556	+	5	179,862,135,203,88	RASAL2	hsa_circ_0111312	10701	1467	1	Cancer_specific	Exclusively_altered_in_GBM	NA	NA	NA	NA	-3.07412	5.10602e-09	5.65608e-07	Down	NA	NA	NA	NA	NA	NA	NA	NA	NA	NA	NA	NA	NA	NA	NA	NA	NA	NA	NA	NA
chr1	181546901	181549912	+	3	104,153,182	CACNA1E	hsa_circ_0015537	3011	439	1	Cancer_specific	Exclusively_altered_in_GBM	NA	NA	NA	NA	-1.23645	0.00256034	0.0112222	Down	NA	NA	NA	NA	NA	NA	NA	NA	NA	NA	NA	NA	NA	NA	NA	NA	NA	NA	NA	NA
chr1	190195211	190250880	-	4	237,106,191,191	BRINP3	hsa_circ_0111550	55669	725	1	Cancer_specific	Exclusively_altered_in_GBM	NA	NA	NA	NA	1.13328	0.00911813	0.029549	Up	NA	NA	NA	NA	NA	NA	NA	NA	NA	NA	NA	NA	NA	NA	NA	NA	NA	NA	NA	NA
chr1	201816406	201817722	+	3	62,87,202	IPO9	hsa_circ_0003115	1316	351	1	Cancer_specific	Exclusively_altered_in_GBM	NA	NA	NA	NA	-1.50893	0.000133997	0.00101729	Down	NA	NA	NA	NA	NA	NA	NA	NA	NA	NA	NA	NA	NA	NA	NA	NA	NA	NA	NA	NA
chr1	204437997	204439014	-	1	1017	PIK3C2B	hsa_circ_0000174	1017	1017	1	Cancer_specific	Exclusively_altered_in_GBM	NA	NA	NA	NA	-1.05651	0.00113665	0.00578293	Down	NA	NA	NA	NA	NA	NA	NA	NA	NA	NA	NA	NA	NA	NA	NA	NA	NA	NA	NA	NA
chr1	211192205	211264032	-	3	393,119,129	KCNH1	hsa_circ_0111832	71827	641	1	Cancer_specific	Exclusively_altered_in_GBM	NA	NA	NA	NA	-1.62154	0.000202301	0.00142077	Down	NA	NA	NA	NA	NA	NA	NA	NA	NA	NA	NA	NA	NA	NA	NA	NA	NA	NA	NA	NA
chr1	211256121	211280719	-	4	119,129,107,124	KCNH1	hsa_circ_0016351	24598	479	1	Cancer_specific	Exclusively_altered_in_GBM	NA	NA	NA	NA	-2.06738	1.48812e-07	5.95645e-06	Down	NA	NA	NA	NA	NA	NA	NA	NA	NA	NA	NA	NA	NA	NA	NA	NA	NA	NA	NA	NA
chr1	213251037	213341316	+	5	121,116,94,363,116	RPS6KC1	hsa_circ_0111924	90279	810	1	Cancer_specific	Exclusively_altered_in_GBM	NA	NA	NA	NA	-1.49041	0.000173045	0.00124766	Down	NA	NA	NA	NA	NA	NA	NA	NA	NA	NA	NA	NA	NA	NA	NA	NA	NA	NA	NA	NA
chr1	213251037	213349835	+	6	121,116,94,363,116,93	RPS6KC1	hsa_circ_0111925	98798	903	1	Cancer_specific	Exclusively_altered_in_GBM	NA	NA	NA	NA	-1.17948	0.000834177	0.00448762	Down	NA	NA	NA	NA	NA	NA	NA	NA	NA	NA	NA	NA	NA	NA	NA	NA	NA	NA	NA	NA
chr1	213302869	213349835	+	3	363,116,93	RPS6KC1	hsa_circ_0007772	46966	572	1	Cancer_specific	Exclusively_altered_in_GBM	NA	NA	NA	NA	-1.58643	3.42814e-08	2.32066e-06	Down	NA	NA	NA	NA	NA	NA	NA	NA	0.0632063	0.937503	0.967528	None	NA	NA	NA	NA	NA	NA	NA	NA
chr1	214169811	214185058	+	3	1792,108,195	PROX1	hsa_circ_0111952	15247	2095	1	Cancer_specific	Exclusively_altered_in_THCA	NA	NA	NA	NA	-0.047315	0.912267	0.939245	None	NA	NA	NA	NA	-1.81458	9.4796e-07	4.98924e-05	Down	NA	NA	NA	NA	0.352998	0.13731	0.324634	None	NA	NA	NA	NA
chr1	215342541	215345526	+	2	161,187	KCNK2	hsa_circ_0008788	2985	348	1	Cancer_specific	Exclusively_altered_in_THCA	NA	NA	NA	NA	-0.410683	0.32533	0.467746	None	NA	NA	NA	NA	-1.23333	0.00169038	0.0215082	Down	NA	NA	NA	NA	NA	NA	NA	NA	NA	NA	NA	NA
chr1	220771672	220792097	+	6	49,66,71,57,237,120	MARK1	hsa_circ_0112073	20425	600	1	Cancer_specific	Exclusively_altered_in_GBM	NA	NA	NA	NA	-1.38742	0.000362753	0.00232639	Down	NA	NA	NA	NA	NA	NA	NA	NA	NA	NA	NA	NA	NA	NA	NA	NA	NA	NA	NA	NA
chr1	224377278	224378021	+	1	743	DEGS1	hsa_circ_0112127	743	743	2	circRNA_altered_in_2_cancer_types	Inconsistently_altered	NA	NA	NA	NA	-0.119208	0.757276	0.833244	None	NA	NA	NA	NA	1.04881	0.00430904	0.0427146	Up	-0.0674288	0.912267	0.958091	None	NA	NA	NA	NA	-1.74747	7.36302e-05	0.00053864	Down
chr1	227381486	227441856	-	4	149,96,84,92	CDC42BPA	hsa_circ_0016754	60370	421	1	Cancer_specific	Exclusively_altered_in_GBM	NA	NA	NA	NA	-1.84398	6.74551e-07	1.76761e-05	Down	NA	NA	NA	NA	NA	NA	NA	NA	NA	NA	NA	NA	NA	NA	NA	NA	NA	NA	NA	NA
chr1	232596632	232607274	-	3	275,577,158	SIPA1L2	hsa_circ_0112394	10642	1010	3	circRNA_altered_in_3_cancer_types	Inconsistently_altered	NA	NA	NA	NA	1.00255	0.0084464	0.0278161	Up	-0.664673	0.0198194	0.0857833	None	1.54062	8.68844e-07	4.77864e-05	Up	-1.79173	0.0129973	0.0986655	None	NA	NA	NA	NA	-1.02272	0.00119714	0.0060797	Down
chr1	233270758	233372726	-	13	178,142,151,93,97,110,92,111,172,33,154,146,136	PCNXL2	hsa_circ_0016958	101968	1615	2	circRNA_altered_in_2_cancer_types	Inconsistently_altered	NA	NA	NA	NA	-1.75231	3.7609e-08	2.47711e-06	Down	NA	NA	NA	NA	2.06311	1.17075e-05	0.000424313	Up	NA	NA	NA	NA	NA	NA	NA	NA	NA	NA	NA	NA
chr1	233296028	233372726	-	11	151,93,97,110,92,111,172,33,154,146,136	PCNXL2	hsa_circ_0016962	76698	1295	1	Cancer_specific	Exclusively_altered_in_GBM	NA	NA	NA	NA	-1.42057	2.19805e-06	4.05806e-05	Down	NA	NA	NA	NA	NA	NA	NA	NA	NA	NA	NA	NA	NA	NA	NA	NA	NA	NA	NA	NA
chr1	233313547	233344435	-	5	97,110,92,111,172	PCNXL2	hsa_circ_0001958	30888	582	1	Cancer_specific	Exclusively_altered_in_THCA	NA	NA	NA	NA	-0.410824	0.240212	0.373816	None	NA	NA	NA	NA	1.23334	7.63348e-05	0.00188624	Up	NA	NA	NA	NA	NA	NA	NA	NA	NA	NA	NA	NA
chr1	233334684	233372726	-	7	92,111,172,33,154,146,136	PCNXL2	hsa_circ_0000198	38042	844	2	circRNA_altered_in_2_cancer_types	Inconsistently_altered	NA	NA	NA	NA	-1.11231	6.39365e-08	3.62356e-06	Down	NA	NA	NA	NA	1.25046	5.42408e-05	0.00149162	Up	NA	NA	NA	NA	NA	NA	NA	NA	NA	NA	NA	NA
chr1	233353644	233372726	-	4	33,154,146,136	PCNXL2	hsa_circ_0016979	19082	469	1	Cancer_specific	Exclusively_altered_in_GBM	NA	NA	NA	NA	-1.0592	0.00406773	0.01576	Down	NA	NA	NA	NA	NA	NA	NA	NA	NA	NA	NA	NA	NA	NA	NA	NA	NA	NA	NA	NA
chr1	237532833	237620035	+	11	75,79,113,100,97,75,157,165,122,184,136	RYR2	hsa_circ_0112624	87202	1303	1	Cancer_specific	Exclusively_altered_in_GBM	NA	NA	NA	NA	-1.82746	0.000205349	0.00143804	Down	NA	NA	NA	NA	NA	NA	NA	NA	-2.46675	0.0178339	0.116138	None	NA	NA	NA	NA	NA	NA	NA	NA
chr1	237532833	237632487	+	12	75,79,113,100,97,75,157,165,122,184,136,96	RYR2	hsa_circ_0112625	99654	1399	1	Cancer_specific	Exclusively_altered_in_GBM	NA	NA	NA	NA	-2.40111	3.30545e-06	5.67281e-05	Down	NA	NA	NA	NA	NA	NA	NA	NA	NA	NA	NA	NA	NA	NA	NA	NA	NA	NA	NA	NA
chr1	240351506	240421332	+	4	56,1934,145,88	FMN2	hsa_circ_0112703	69826	2223	1	Cancer_specific	Exclusively_altered_in_GBM	NA	NA	NA	NA	-1.76871	1.3176e-05	0.000166373	Down	NA	NA	NA	NA	NA	NA	NA	NA	NA	NA	NA	NA	NA	NA	NA	NA	NA	NA	NA	NA
chr1	240370098	240421332	+	3	1934,145,88	FMN2	hsa_circ_0112705	51234	2167	1	Cancer_specific	Exclusively_altered_in_CRC	NA	NA	NA	NA	-0.3636	0.134523	0.243551	None	NA	NA	NA	NA	NA	NA	NA	NA	-1.66338	0.104159	0.29877	None	NA	NA	NA	NA	-3.50679	1.45341e-09	5.41284e-08	Down
chr1	240370098	240458183	+	4	1934,145,88,62	FMN2	hsa_circ_0017184	88085	2229	1	Cancer_specific	Exclusively_altered_in_CRC	NA	NA	NA	NA	-0.423819	0.103576	0.19938	None	NA	NA	NA	NA	NA	NA	NA	NA	-1.31344	0.118557	0.322538	None	NA	NA	NA	NA	-4.64498	2.03492e-10	9.26264e-09	Down
chr1	243727021	244006584	-	9	129,123,69,66,132,145,112,126,158	AKT3	hsa_circ_0017244	279563	1060	1	Cancer_specific	Exclusively_altered_in_GBM	NA	NA	NA	NA	-1.52943	2.71396e-08	2.00422e-06	Down	NA	NA	NA	NA	NA	NA	NA	NA	NA	NA	NA	NA	NA	NA	NA	NA	NA	NA	NA	NA
chr1	243736227	244006584	-	8	123,69,66,132,145,112,126,158	AKT3	hsa_circ_0017248	270357	931	1	Cancer_specific	Exclusively_altered_in_GBM	NA	NA	NA	NA	-1.59034	1.60544e-11	7.82493e-09	Down	NA	NA	NA	NA	NA	NA	NA	NA	NA	NA	NA	NA	NA	NA	NA	NA	NA	NA	NA	NA
chr1	243776972	243859018	-	6	69,66,132,145,112,126	AKT3	hsa_circ_0017251	82046	650	1	Cancer_specific	Exclusively_altered_in_LUAD	NA	NA	NA	NA	-0.384067	0.0270276	0.0693328	None	-1.09583	0.00438898	0.0290475	Down	-0.232202	0.356726	0.649167	None	NA	NA	NA	NA	NA	NA	NA	NA	NA	NA	NA	NA
chr4	1902352	1906105	+	2	626,163	WHSC1	hsa_circ_0008460	3753	789	1	Cancer_specific	Exclusively_altered_in_GC	NA	NA	NA	NA	0.113898	0.743096	0.820537	None	0.686294	0.0718188	0.200104	None	-0.311144	0.264521	0.560694	None	1.52554	0.00243054	0.0412971	Up	0.60826	0.115959	0.294294	None	0.394561	0.128678	0.244807	None
chr4	2986239	3031136	+	11	96,113,78,104,93,64,141,191,38,90,209	GRK4	hsa_circ_0126142	44897	1217	1	Cancer_specific	Exclusively_altered_in_GBM	NA	NA	NA	NA	-1.17001	2.26031e-05	0.000247012	Down	NA	NA	NA	NA	NA	NA	NA	NA	NA	NA	NA	NA	NA	NA	NA	NA	NA	NA	NA	NA
chr4	3254933	3255209	+	1	276	MSANTD1	hsa_circ_0126198	276	276	1	Cancer_specific	Exclusively_altered_in_GBM	NA	NA	NA	NA	-1.06823	0.0072849	0.0250046	Down	NA	NA	NA	NA	NA	NA	NA	NA	NA	NA	NA	NA	NA	NA	NA	NA	NA	NA	NA	NA
chr4	3317796	3344780	+	2	1982,117	RGS12	hsa_circ_0006091	26984	2099	2	circRNA_altered_in_2_cancer_types	Consistently_altered	NA	NA	NA	NA	1.55812	0.0012758	0.00642381	Up	NA	NA	NA	NA	NA	NA	NA	NA	NA	NA	NA	NA	1.7259	0.000906399	0.00898846	Up	NA	NA	NA	NA
chr4	4239553	4248070	-	3	109,159,142	TMEM128	hsa_circ_0005963	8517	410	1	Cancer_specific	Exclusively_altered_in_CRC	NA	NA	NA	NA	-0.292212	0.391623	0.53527	None	NA	NA	NA	NA	0.165738	0.677287	0.855423	None	-1.01219	0.175838	0.399807	None	NA	NA	NA	NA	-1.0637	0.00829386	0.0278502	Down
chr4	16587544	16597498	-	3	84,123,173	LDB2	hsa_circ_0009006	9954	380	1	Cancer_specific	Exclusively_altered_in_GBM	NA	NA	NA	NA	-1.61919	0.00028275	0.00188268	Down	NA	NA	NA	NA	NA	NA	NA	NA	NA	NA	NA	NA	NA	NA	NA	NA	NA	NA	NA	NA
chr4	16587544	16760883	-	4	84,123,173,103	LDB2	hsa_circ_0069244	173339	483	2	circRNA_altered_in_2_cancer_types	Consistently_altered	NA	NA	NA	NA	-1.47541	0.000234827	0.00160301	Down	-2.02015	3.04946e-05	0.00047587	Down	NA	NA	NA	NA	NA	NA	NA	NA	NA	NA	NA	NA	NA	NA	NA	NA
chr4	36189072	36231267	-	7	121,70,354,92,77,59,1064	ARAP2	hsa_circ_0126215	42195	1837	1	Cancer_specific	Exclusively_altered_in_GBM	NA	NA	NA	NA	-1.00503	0.00178766	0.00849224	Down	NA	NA	NA	NA	-1.11452	0.00703079	0.0602387	None	NA	NA	NA	NA	NA	NA	NA	NA	NA	NA	NA	NA
chr4	40892380	40947090	-	5	128,147,61,86,209	APBB2	hsa_circ_0069562	54710	631	3	circRNA_altered_in_3_cancer_types	Consistently_altered	NA	NA	NA	NA	-1.06909	0.00540531	0.0196007	Down	-0.449878	0.207003	0.40967	None	-1.03844	6.5268e-05	0.00170803	Down	-1.25821	0.0998924	0.294014	None	-0.827959	0.109628	0.282241	None	-1.35914	0.00374592	0.0147556	Down
chr4	42487512	42526864	-	5	173,65,139,140,85	ATP8A1	hsa_circ_0069608	39352	602	1	Cancer_specific	Exclusively_altered_in_GBM	NA	NA	NA	NA	-1.36595	4.13703e-05	0.000404897	Down	NA	NA	NA	NA	-0.509771	0.096755	0.343238	None	NA	NA	NA	NA	NA	NA	NA	NA	NA	NA	NA	NA
chr4	42487512	42558057	-	10	173,65,139,140,85,70,50,83,106,73	ATP8A1	hsa_circ_0126419	70545	984	1	Cancer_specific	Exclusively_altered_in_GBM	NA	NA	NA	NA	-1.30645	0.00193919	0.00903597	Down	NA	NA	NA	NA	NA	NA	NA	NA	NA	NA	NA	NA	NA	NA	NA	NA	NA	NA	NA	NA
chr4	42505466	42526864	-	4	65,139,140,85	ATP8A1	hsa_circ_0069612	21398	429	1	Cancer_specific	Exclusively_altered_in_GBM	NA	NA	NA	NA	-2.00985	2.46255e-05	0.000264864	Down	NA	NA	NA	NA	-0.98186	0.000418716	0.0072848	None	NA	NA	NA	NA	NA	NA	NA	NA	NA	NA	NA	NA
chr4	42505466	42546003	-	5	65,139,140,85,70	ATP8A1	hsa_circ_0069613	40537	499	1	Cancer_specific	Exclusively_altered_in_GBM	NA	NA	NA	NA	-1.69818	3.8356e-07	1.18992e-05	Down	NA	NA	NA	NA	-0.487372	0.0483411	0.223939	None	NA	NA	NA	NA	NA	NA	NA	NA	NA	NA	NA	NA
chr4	46305476	46314733	-	4	153,144,83,221	GABRA2	hsa_circ_0126488	9257	601	1	Cancer_specific	Exclusively_altered_in_GBM	NA	NA	NA	NA	-1.20917	0.00280523	0.0119726	Down	NA	NA	NA	NA	NA	NA	NA	NA	NA	NA	NA	NA	NA	NA	NA	NA	NA	NA	NA	NA
chr4	46966986	46981115	-	6	260,153,144,83,221,68	GABRA4	hsa_circ_0126493	14129	929	1	Cancer_specific	Exclusively_altered_in_GBM	NA	NA	NA	NA	-1.73498	0.00223945	0.0101253	Down	NA	NA	NA	NA	NA	NA	NA	NA	NA	NA	NA	NA	NA	NA	NA	NA	NA	NA	NA	NA
chr4	56319220	56322467	-	4	76,148,107,83	CLOCK	hsa_circ_0069789	3247	414	1	Cancer_specific	Exclusively_altered_in_GC	NA	NA	NA	NA	-0.483705	0.141647	0.253633	None	NA	NA	NA	NA	NA	NA	NA	NA	-2.87754	0.000353102	0.0123383	Down	NA	NA	NA	NA	NA	NA	NA	NA
chr4	62362838	62383236	+	2	228,204	LPHN3	hsa_circ_0126737	20398	432	1	Cancer_specific	Exclusively_altered_in_GBM	NA	NA	NA	NA	1.31222	0.00093288	0.00491021	Up	NA	NA	NA	NA	NA	NA	NA	NA	NA	NA	NA	NA	NA	NA	NA	NA	NA	NA	NA	NA
chr4	62800557	62813994	+	4	184,123,209,177	LPHN3	hsa_circ_0069863	13437	693	2	circRNA_altered_in_2_cancer_types	Inconsistently_altered	NA	NA	NA	NA	1.4115	5.68467e-07	1.53928e-05	Up	-2.53054	8.03609e-06	0.000157119	Down	NA	NA	NA	NA	-1.54606	0.0233097	0.13073	None	NA	NA	NA	NA	NA	NA	NA	NA
chr4	62800557	62863983	+	8	184,123,209,177,210,221,67,92	LPHN3	hsa_circ_0126761	63426	1283	3	circRNA_altered_in_3_cancer_types	Inconsistently_altered	NA	NA	NA	NA	1.53504	1.31786e-07	5.74428e-06	Up	-2.63729	3.31722e-09	3.13478e-07	Down	NA	NA	NA	NA	-1.2434	0.0343294	0.159606	None	NA	NA	NA	NA	-1.35034	0.00339796	0.0136029	Down
chr4	62800557	62910267	+	12	184,123,209,177,210,221,67,92,27,169,126,97	LPHN3	hsa_circ_0069865	109710	1702	2	circRNA_altered_in_2_cancer_types	Inconsistently_altered	NA	NA	NA	NA	1.40566	4.72544e-06	7.56e-05	Up	-2.49362	4.15556e-06	9.24001e-05	Down	NA	NA	NA	NA	-2.11773	0.00399555	0.0565733	None	NA	NA	NA	NA	-0.761811	0.150084	0.276128	None
chr4	66270091	66286283	-	3	103,160,125	EPHA5	hsa_circ_0126808	16192	388	1	Cancer_specific	Exclusively_altered_in_GBM	NA	NA	NA	NA	-1.22684	0.0115263	0.0355114	Down	NA	NA	NA	NA	NA	NA	NA	NA	NA	NA	NA	NA	NA	NA	NA	NA	NA	NA	NA	NA
chr4	68594257	68598063	+	3	147,97,840	UBA6-AS1	hsa_circ_0126851	3806	1084	1	Cancer_specific	Exclusively_altered_in_GBM	NA	NA	NA	NA	-1.39299	0.000138119	0.00103568	Down	NA	NA	NA	NA	NA	NA	NA	NA	NA	NA	NA	NA	NA	NA	NA	NA	NA	NA	NA	NA
chr4	72205086	72222904	+	3	136,161,180	SLC4A4	hsa_circ_0008676	17818	477	1	Cancer_specific	Exclusively_altered_in_GBM	NA	NA	NA	NA	1.11881	0.00130605	0.00653562	Up	NA	NA	NA	NA	NA	NA	NA	NA	NA	NA	NA	NA	NA	NA	NA	NA	NA	NA	NA	NA
chr4	77317421	77324433	-	2	218,143	CCDC158	hsa_circ_0126980	7012	361	1	Cancer_specific	Exclusively_altered_in_GBM	NA	NA	NA	NA	-1.56921	0.000977751	0.00511326	Down	NA	NA	NA	NA	NA	NA	NA	NA	NA	NA	NA	NA	NA	NA	NA	NA	NA	NA	NA	NA
chr4	77917577	77952123	+	8	115,196,187,162,97,169,133,188	SEPT11	hsa_circ_0070057	34546	1247	1	Cancer_specific	Exclusively_altered_in_GBM	NA	NA	NA	NA	-1.56963	2.41503e-07	8.52959e-06	Down	NA	NA	NA	NA	NA	NA	NA	NA	NA	NA	NA	NA	NA	NA	NA	NA	NA	NA	NA	NA
chr4	88091230	88116842	-	7	160,169,112,144,187,549,367	KLHL8	hsa_circ_0070389	25612	1688	1	Cancer_specific	Exclusively_altered_in_THCA	NA	NA	NA	NA	0.0805893	0.815701	0.875325	None	NA	NA	NA	NA	-1.37775	0.000347982	0.00624537	Down	NA	NA	NA	NA	NA	NA	NA	NA	NA	NA	NA	NA
chr4	88104354	88116842	-	3	187,549,367	KLHL8	hsa_circ_0006866	12488	1103	1	Cancer_specific	Exclusively_altered_in_THCA	NA	NA	NA	NA	0.155629	0.619018	0.730834	None	NA	NA	NA	NA	-1.47796	4.11254e-06	0.000175297	Down	NA	NA	NA	NA	NA	NA	NA	NA	-0.623372	0.181245	0.319127	None
chr4	108866125	108868693	+	2	636,162	CYP2U1	hsa_circ_0070618	2568	798	2	circRNA_altered_in_2_cancer_types	Consistently_altered	NA	NA	NA	NA	0.0780969	0.722902	0.808496	None	-1.04506	0.00142821	0.0120865	Down	NA	NA	NA	NA	-1.24424	0.0161425	0.110514	None	NA	NA	NA	NA	-1.24508	0.00187624	0.00850887	Down
chr4	118974910	119036115	+	3	1136,88,155	NDST3	hsa_circ_0125141	61205	1379	1	Cancer_specific	Exclusively_altered_in_GBM	NA	NA	NA	NA	-2.78997	2.46714e-05	0.000264864	Down	NA	NA	NA	NA	NA	NA	NA	NA	NA	NA	NA	NA	NA	NA	NA	NA	NA	NA	NA	NA
chr4	118974910	119064839	+	5	1136,88,155,186,129	NDST3	hsa_circ_0125143	89929	1694	1	Cancer_specific	Exclusively_altered_in_GBM	NA	NA	NA	NA	-2.1	1.52359e-05	0.000187525	Down	NA	NA	NA	NA	NA	NA	NA	NA	NA	NA	NA	NA	NA	NA	NA	NA	NA	NA	NA	NA
chr4	119026172	119064839	+	4	88,155,186,129	NDST3	hsa_circ_0125149	38667	558	1	Cancer_specific	Exclusively_altered_in_GBM	NA	NA	NA	NA	-1.68087	3.88406e-05	0.000383217	Down	NA	NA	NA	NA	NA	NA	NA	NA	NA	NA	NA	NA	NA	NA	NA	NA	NA	NA	NA	NA
chr4	123111154	123122281	+	6	80,151,157,79,92,118	KIAA1109	hsa_circ_0125209	11127	677	1	Cancer_specific	Exclusively_altered_in_GBM	NA	NA	NA	NA	-1.02906	0.00755301	0.0257077	Down	NA	NA	NA	NA	NA	NA	NA	NA	NA	NA	NA	NA	NA	NA	NA	NA	NA	NA	NA	NA
chr4	149073619	149076052	-	2	145,351	NR3C2	hsa_circ_0125480	2433	496	2	circRNA_altered_in_2_cancer_types	Consistently_altered	NA	NA	NA	NA	-1.61392	2.12433e-07	7.61321e-06	Down	-1.37169	0.00270489	0.0195373	Down	-0.686855	0.0225822	0.135573	None	-1.19174	0.0620269	0.222085	None	NA	NA	NA	NA	NA	NA	NA	NA
chr4	151124946	151161027	+	7	95,76,109,58,120,147,134	DCLK2	hsa_circ_0125503	36081	739	1	Cancer_specific	Exclusively_altered_in_GBM	NA	NA	NA	NA	-2.07956	2.17654e-05	0.000240011	Down	NA	NA	NA	NA	NA	NA	NA	NA	NA	NA	NA	NA	NA	NA	NA	NA	NA	NA	NA	NA
chr4	152095821	152108615	-	5	1005,163,139,43,41	SH3D19	hsa_circ_0071261	12794	1391	1	Cancer_specific	Exclusively_altered_in_LUAD	NA	NA	NA	NA	0.113496	0.708199	0.801586	None	-1.23799	5.82105e-05	0.000805008	Down	0.122799	0.678719	0.855423	None	-0.194064	0.670766	0.840255	None	-0.10249	0.803471	0.892653	None	0.0221518	0.937973	0.967088	None
chr4	183522076	183550042	+	2	238,239	TENM3	hsa_circ_0071480	27966	477	1	Cancer_specific	Exclusively_altered_in_GBM	NA	NA	NA	NA	-1.83958	2.58448e-06	4.63997e-05	Down	NA	NA	NA	NA	NA	NA	NA	NA	NA	NA	NA	NA	NA	NA	NA	NA	NA	NA	NA	NA
chr4	183522076	183575046	+	3	238,239,123	TENM3	hsa_circ_0125881	52970	600	1	Cancer_specific	Exclusively_altered_in_GBM	NA	NA	NA	NA	-1.61233	0.00110077	0.00563569	Down	NA	NA	NA	NA	NA	NA	NA	NA	NA	NA	NA	NA	NA	NA	NA	NA	NA	NA	NA	NA
chr12	1399017	1553916	+	4	161,145,99,189	ERC1	hsa_circ_0024999	154899	594	1	Cancer_specific	Exclusively_altered_in_GBM	NA	NA	NA	NA	-1.81852	0.000569292	0.00325673	Down	NA	NA	NA	NA	NA	NA	NA	NA	NA	NA	NA	NA	NA	NA	NA	NA	NA	NA	NA	NA
chr11	16119154	16208501	-	4	80,121,69,173	SOX6	hsa_circ_0021347	89347	443	1	Cancer_specific	Exclusively_altered_in_GBM	NA	NA	NA	NA	2.35615	1.95486e-05	0.000224821	Up	NA	NA	NA	NA	NA	NA	NA	NA	NA	NA	NA	NA	NA	NA	NA	NA	NA	NA	NA	NA
chr10	7409610	7423911	-	3	241,95,151	SFMBT2	hsa_circ_0017648	14301	487	1	Cancer_specific	Exclusively_altered_in_GBM	NA	NA	NA	NA	1.09692	0.00657544	0.0230235	Up	NA	NA	NA	NA	NA	NA	NA	NA	NA	NA	NA	NA	NA	NA	NA	NA	NA	NA	NA	NA
chr10	11207448	11259470	+	2	197,83	CELF2	hsa_circ_0092638	52022	280	1	Cancer_specific	Exclusively_altered_in_GBM	NA	NA	NA	NA	-1.5389	0.00394521	0.0153586	Down	NA	NA	NA	NA	NA	NA	NA	NA	NA	NA	NA	NA	NA	NA	NA	NA	NA	NA	NA	NA
chr10	24908401	24924032	-	5	1897,30,55,79,93	ARHGAP21	hsa_circ_0093354	15631	2154	1	Cancer_specific	Exclusively_altered_in_GBM	NA	NA	NA	NA	-1.1406	0.000864498	0.00462014	Down	NA	NA	NA	NA	NA	NA	NA	NA	NA	NA	NA	NA	NA	NA	NA	NA	NA	NA	NA	NA
chr6	136472297	136476896	+	3	96,101,132	PDE7B	hsa_circ_0002198	4599	329	1	Cancer_specific	Exclusively_altered_in_GBM	NA	NA	NA	NA	-1.34147	0.00950914	0.0304517	Down	NA	NA	NA	NA	NA	NA	NA	NA	-3.23713	0.0118148	0.0947721	None	NA	NA	NA	NA	NA	NA	NA	NA
chr8	136554896	136569830	+	3	117,147,140	KHDRBS3	hsa_circ_0002125	14934	404	1	Cancer_specific	Exclusively_altered_in_GBM	NA	NA	NA	NA	-1.08004	0.00468953	0.0177082	Down	NA	NA	NA	NA	NA	NA	NA	NA	NA	NA	NA	NA	NA	NA	NA	NA	NA	NA	NA	NA
chr21	32554737	32567621	-	3	225,87,82	TIAM1	hsa_circ_0061406	12884	394	2	circRNA_altered_in_2_cancer_types	Consistently_altered	NA	NA	NA	NA	1.3545	0.0052137	0.0190491	Up	NA	NA	NA	NA	2.98843	1.55174e-08	1.55631e-06	Up	NA	NA	NA	NA	NA	NA	NA	NA	NA	NA	NA	NA
chrX	67316711	67339174	-	4	160,106,59,85	OPHN1	hsa_circ_0090930	22463	410	1	Cancer_specific	Exclusively_altered_in_GBM	NA	NA	NA	NA	1.56724	0.0118298	0.0362632	Up	NA	NA	NA	NA	NA	NA	NA	NA	NA	NA	NA	NA	NA	NA	NA	NA	NA	NA	NA	NA
chr9	4117767	4125941	-	2	1114,208	GLIS3	hsa_circ_0007368	8174	1322	1	Cancer_specific	Exclusively_altered_in_GBM	NA	NA	NA	NA	1.75578	0.000224757	0.00154291	Up	NA	NA	NA	NA	-0.844209	0.000651741	0.010084	None	NA	NA	NA	NA	-0.64899	0.144121	0.335551	None	NA	NA	NA	NA
chr7	138189034	138223548	+	6	119,148,133,117,115,147	TRIM24	hsa_circ_0082574	34514	779	1	Cancer_specific	Exclusively_altered_in_HCC	NA	NA	NA	NA	0.911255	0.0600413	0.13076	None	NA	NA	NA	NA	NA	NA	NA	NA	NA	NA	NA	NA	1.933	0.000365282	0.00461402	Up	NA	NA	NA	NA
chr1	48821341	48869554	-	6	100,185,41,88,294,81	SPATA6	hsa_circ_0012386	48213	789	2	circRNA_altered_in_2_cancer_types	Inconsistently_altered	NA	NA	NA	NA	1.90156	7.35756e-06	0.000105468	Up	-1.562	1.07115e-06	3.0367e-05	Down	-0.299505	0.241775	0.539564	None	-0.573986	0.27419	0.515112	None	NA	NA	NA	NA	-0.550252	0.130001	0.24618	None
chr4	17503341	17510986	-	3	141,97,93	QDPR	hsa_circ_0069249	7645	331	2	circRNA_altered_in_2_cancer_types	Consistently_altered	NA	NA	NA	NA	-1.74198	5.18976e-05	0.000477262	Down	NA	NA	NA	NA	NA	NA	NA	NA	NA	NA	NA	NA	-1.41283	0.000248825	0.00350647	Down	NA	NA	NA	NA
chr4	62800557	62849321	+	6	184,123,209,177,210,221	LPHN3	hsa_circ_0069864	48764	1124	1	Cancer_specific	Exclusively_altered_in_GBM	NA	NA	NA	NA	1.31812	0.00109877	0.00563569	Up	NA	NA	NA	NA	NA	NA	NA	NA	NA	NA	NA	NA	NA	NA	NA	NA	NA	NA	NA	NA
chr18	76886266	76967012	+	5	109,59,52,81,76	ATP9B	hsa_circ_0007955	80746	377	1	Cancer_specific	Exclusively_altered_in_GBM	NA	NA	NA	NA	1.41691	0.00232117	0.0103983	Up	NA	NA	NA	NA	NA	NA	NA	NA	NA	NA	NA	NA	NA	NA	NA	NA	NA	NA	NA	NA
chr20	46365446	46386207	-	2	240,275	SULF2	hsa_circ_0060640	20761	515	1	Cancer_specific	Exclusively_altered_in_GBM	NA	NA	NA	NA	1.58711	0.00318814	0.0130361	Up	NA	NA	NA	NA	NA	NA	NA	NA	NA	NA	NA	NA	NA	NA	NA	NA	NA	NA	NA	NA
chr5	82815167	82818128	+	1	2961	VCAN	hsa_circ_0073236	2961	2961	1	Cancer_specific	Exclusively_altered_in_GBM	NA	NA	NA	NA	1.44522	0.00181677	0.00858037	Up	NA	NA	NA	NA	NA	NA	NA	NA	NA	NA	NA	NA	NA	NA	NA	NA	NA	NA	NA	NA
chr3	47762155	47787483	-	5	70,70,93,82,86	SMARCC1	hsa_circ_0065301	25328	401	1	Cancer_specific	Exclusively_altered_in_GBM	NA	NA	NA	NA	1.06327	0.00990458	0.03147	Up	NA	NA	NA	NA	NA	NA	NA	NA	0.603111	0.34554	0.581814	None	NA	NA	NA	NA	NA	NA	NA	NA
chr2	188243666	188252483	-	7	92,113,111,133,87,165,91	CALCRL	hsa_circ_0118335	8817	792	2	circRNA_altered_in_2_cancer_types	Inconsistently_altered	NA	NA	NA	NA	1.53647	0.00328436	0.0132957	Up	-2.14505	4.05791e-08	2.55648e-06	Down	NA	NA	NA	NA	NA	NA	NA	NA	NA	NA	NA	NA	NA	NA	NA	NA
chr12	88909310	88939642	-	5	84,157,171,63,114	KITLG	hsa_circ_0099427	30332	589	2	circRNA_altered_in_2_cancer_types	Consistently_altered	NA	NA	NA	NA	NA	NA	NA	NA	-1.63489	2.60517e-07	1.09417e-05	Down	NA	NA	NA	NA	-1.17	0.0235663	0.13073	None	NA	NA	NA	NA	-1.88265	2.30064e-05	0.000206386	Down
chr12	114823280	114841741	-	6	92,153,148,120,95,185	TBX5	hsa_circ_0003176	18461	793	1	Cancer_specific	Exclusively_altered_in_LUAD	NA	NA	NA	NA	NA	NA	NA	NA	-1.36541	2.47109e-06	6.09176e-05	Down	NA	NA	NA	NA	NA	NA	NA	NA	NA	NA	NA	NA	NA	NA	NA	NA
chr11	33307958	33350179	+	2	1099,124	HIPK3	hsa_circ_0008887	42221	1223	1	Cancer_specific	Exclusively_altered_in_CRC	NA	NA	NA	NA	NA	NA	NA	NA	-0.743927	0.0348591	0.120519	None	0.185941	0.485257	0.740357	None	-1.50114	0.00472397	0.0613132	None	NA	NA	NA	NA	-1.12226	0.00173141	0.00796967	Down
chr11	89155069	89185063	-	6	81,73,28,98,85,111	NOX4	hsa_circ_0023988	29994	476	1	Cancer_specific	Exclusively_altered_in_THCA	NA	NA	NA	NA	NA	NA	NA	NA	0.63557	0.0705627	0.198556	None	2.30113	6.48573e-07	4.09562e-05	Up	NA	NA	NA	NA	NA	NA	NA	NA	NA	NA	NA	NA
chr10	15590453	15628663	-	5	114,129,159,106,81	ITGA8	hsa_circ_0093211	38210	589	1	Cancer_specific	Exclusively_altered_in_LUAD	NA	NA	NA	NA	NA	NA	NA	NA	-1.25436	0.00230051	0.0176268	Down	NA	NA	NA	NA	-2.12319	0.0190937	0.119351	None	NA	NA	NA	NA	NA	NA	NA	NA
chr10	30315031	30318795	-	1	3764	KIAA1462	hsa_circ_0018069	3764	3764	2	circRNA_altered_in_2_cancer_types	Inconsistently_altered	NA	NA	NA	NA	NA	NA	NA	NA	-0.911145	0.0258473	0.100037	None	2.085	8.63873e-05	0.00210415	Up	NA	NA	NA	NA	NA	NA	NA	NA	-3.5485	2.50175e-10	1.09809e-08	Down
chr10	54040548	54050050	+	5	142,164,123,63,67	PRKG1	hsa_circ_0003030	9502	559	3	circRNA_altered_in_3_cancer_types	Consistently_altered	NA	NA	NA	NA	NA	NA	NA	NA	-1.38899	0.000326697	0.00359684	Down	-1.50771	0.00324607	0.0341639	Down	NA	NA	NA	NA	NA	NA	NA	NA	-1.8078	0.0010799	0.00558102	Down
chr17	54921379	54925426	+	3	160,120,144	DGKE	hsa_circ_0044709	4047	424	1	Cancer_specific	Exclusively_altered_in_LUAD	NA	NA	NA	NA	NA	NA	NA	NA	-1.20624	0.00870377	0.0483827	Down	NA	NA	NA	NA	NA	NA	NA	NA	NA	NA	NA	NA	NA	NA	NA	NA
chr17	67124759	67130883	-	4	186,142,227,104	ABCA6	hsa_circ_0107583	6124	659	1	Cancer_specific	Exclusively_altered_in_LUAD	NA	NA	NA	NA	NA	NA	NA	NA	-2.64072	6.47356e-07	2.15912e-05	Down	NA	NA	NA	NA	NA	NA	NA	NA	NA	NA	NA	NA	NA	NA	NA	NA
chr16	11815432	11830089	-	4	94,130,98,217	TXNDC11	hsa_circ_0009128	14657	539	1	Cancer_specific	Exclusively_altered_in_LUAD	NA	NA	NA	NA	NA	NA	NA	NA	3.0431	1.23196e-07	5.82102e-06	Up	-0.0164428	0.977095	0.994655	None	1.11123	0.0793033	0.255561	None	NA	NA	NA	NA	NA	NA	NA	NA
chr15	55516086	55527154	-	4	124,104,86,175	RAB27A	hsa_circ_0003863	11068	489	1	Cancer_specific	Exclusively_altered_in_THCA	NA	NA	NA	NA	NA	NA	NA	NA	-0.38183	0.274084	0.491013	None	1.07785	0.000599659	0.00955531	Up	1.04235	0.023811	0.13089	None	NA	NA	NA	NA	NA	NA	NA	NA
chr14	96807858	96813678	-	5	180,163,103,153,163	ATG2B	hsa_circ_0002223	5820	762	1	Cancer_specific	Exclusively_altered_in_GC	NA	NA	NA	NA	NA	NA	NA	NA	1.21027	0.0106436	0.056157	None	-0.407607	0.151099	0.427237	None	1.97023	0.00115504	0.023813	Up	NA	NA	NA	NA	NA	NA	NA	NA
chr8	68030482	68049838	+	4	122,79,130,148	CSPP1	hsa_circ_0084678	19356	479	1	Cancer_specific	Exclusively_altered_in_LUAD	NA	NA	NA	NA	NA	NA	NA	NA	-1.41678	0.00167236	0.0139445	Down	NA	NA	NA	NA	NA	NA	NA	NA	NA	NA	NA	NA	NA	NA	NA	NA
chr21	45165959	45168961	+	2	47,86	PDXK	hsa_circ_0008021	3002	133	1	Cancer_specific	Exclusively_altered_in_LUAD	NA	NA	NA	NA	NA	NA	NA	NA	1.25698	0.000193153	0.00231463	Up	-0.0121686	0.974929	0.994655	None	NA	NA	NA	NA	0.785718	0.0658135	0.2061	None	NA	NA	NA	NA
chrX	11187624	11207104	-	6	180,149,151,56,196,257	ARHGAP6	hsa_circ_0139602	19480	989	2	circRNA_altered_in_2_cancer_types	Consistently_altered	NA	NA	NA	NA	NA	NA	NA	NA	-2.09847	1.98532e-05	0.000336023	Down	-1.42499	0.00138449	0.0182106	Down	-1.20907	0.201984	0.428127	None	NA	NA	NA	NA	NA	NA	NA	NA
chr7	116339124	116340338	+	1	1214	MET	hsa_circ_0082002	1214	1214	3	circRNA_altered_in_3_cancer_types	Consistently_altered	NA	NA	NA	NA	NA	NA	NA	NA	2.18489	0.000227039	0.00265425	Up	3.07168	2.56834e-10	4.86557e-08	Up	1.26345	0.127602	0.334515	None	0.803633	0.00736072	0.044041	None	2.25722	4.64327e-07	7.41114e-06	Up
chr5	38527256	38530768	-	3	140,115,161	LIFR	hsa_circ_0129047	3512	416	2	circRNA_altered_in_2_cancer_types	Consistently_altered	NA	NA	NA	NA	NA	NA	NA	NA	-1.61111	0.000347735	0.00379165	Down	-1.25855	0.00439808	0.0433452	Down	NA	NA	NA	NA	NA	NA	NA	NA	NA	NA	NA	NA
chr5	170305100	170323119	+	4	147,91,167,66	RANBP17	hsa_circ_0001554	18019	471	1	Cancer_specific	Exclusively_altered_in_LUAD	NA	NA	NA	NA	NA	NA	NA	NA	1.04478	0.00259218	0.019339	Up	-0.499525	0.135136	0.407184	None	0.633562	0.298829	0.541191	None	NA	NA	NA	NA	0.232247	0.469113	0.634257	None
chr3	8977554	8983488	-	3	185,100,338	RAD18	hsa_circ_0001264	5934	623	1	Cancer_specific	Exclusively_altered_in_CRC	NA	NA	NA	NA	NA	NA	NA	NA	-0.179332	0.513818	0.722915	None	0.106118	0.753695	0.893016	None	0.84439	0.0565174	0.211685	None	0.713567	0.0853012	0.242373	None	1.06096	0.00062554	0.00344748	Up
chr3	185155234	185161424	+	2	184,192	MAP3K13	hsa_circ_0123038	6190	376	1	Cancer_specific	Exclusively_altered_in_LUAD	NA	NA	NA	NA	NA	NA	NA	NA	1.51958	0.00221644	0.0170983	Up	0.27117	0.433855	0.705815	None	NA	NA	NA	NA	0.159882	0.635188	0.780145	None	0.614265	0.0866863	0.180572	None
chr2	32698179	32702651	+	3	128,132,216	BIRC6	hsa_circ_0119816	4472	476	1	Cancer_specific	Exclusively_altered_in_CRC	NA	NA	NA	NA	NA	NA	NA	NA	0.649482	0.0652044	0.188627	None	NA	NA	NA	NA	NA	NA	NA	NA	NA	NA	NA	NA	1.13483	0.00295668	0.012153	Up
chr2	43939363	43968182	+	7	159,81,180,109,113,180,98	PLEKHH2	hsa_circ_0120097	28819	920	1	Cancer_specific	Exclusively_altered_in_LUAD	NA	NA	NA	NA	NA	NA	NA	NA	-1.58469	2.05808e-05	0.000343215	Down	NA	NA	NA	NA	NA	NA	NA	NA	NA	NA	NA	NA	NA	NA	NA	NA
chr2	44021595	44032385	+	7	187,69,78,77,71,98,93	DYNC2LI1	hsa_circ_0120108	10790	673	1	Cancer_specific	Exclusively_altered_in_LUAD	NA	NA	NA	NA	NA	NA	NA	NA	-1.16602	0.00452116	0.0294655	Down	-0.214375	0.605222	0.815721	None	NA	NA	NA	NA	NA	NA	NA	NA	NA	NA	NA	NA
chr2	120885263	120903865	+	4	164,98,129,65	EPB41L5	hsa_circ_0056280	18602	456	1	Cancer_specific	Exclusively_altered_in_LUAD	NA	NA	NA	NA	NA	NA	NA	NA	-1.67777	5.98459e-08	3.23168e-06	Down	-0.451847	0.155332	0.434165	None	-0.745736	0.159261	0.376306	None	-0.5663	0.0681029	0.210804	None	NA	NA	NA	NA
chr2	188223789	188250358	-	9	67,61,154,127,92,113,111,133,87	CALCRL	hsa_circ_0118333	26569	945	1	Cancer_specific	Exclusively_altered_in_LUAD	NA	NA	NA	NA	NA	NA	NA	NA	-2.17838	1.28865e-06	3.47936e-05	Down	NA	NA	NA	NA	NA	NA	NA	NA	NA	NA	NA	NA	NA	NA	NA	NA
chr1	94667275	94697199	-	11	138,189,81,111,65,138,49,73,97,135,237	ARHGAP29	hsa_circ_0013225	29924	1313	1	Cancer_specific	Exclusively_altered_in_LUAD	NA	NA	NA	NA	NA	NA	NA	NA	-1.3244	0.00596324	0.0361621	Down	0.319845	0.357736	0.649524	None	0.478809	0.583445	0.767388	None	NA	NA	NA	NA	NA	NA	NA	NA
chr1	94685813	94697199	-	2	135,237	ARHGAP29	hsa_circ_0003310	11386	372	1	Cancer_specific	Exclusively_altered_in_LUAD	NA	NA	NA	NA	NA	NA	NA	NA	-1.83256	6.50403e-08	3.35253e-06	Down	0.0826636	0.749171	0.890545	None	NA	NA	NA	NA	NA	NA	NA	NA	NA	NA	NA	NA
chr1	169446392	169446995	-	1	603	SLC19A2	hsa_circ_0015164	603	603	1	Cancer_specific	Exclusively_altered_in_LUAD	NA	NA	NA	NA	NA	NA	NA	NA	2.17955	2.84308e-06	6.8597e-05	Up	NA	NA	NA	NA	NA	NA	NA	NA	NA	NA	NA	NA	NA	NA	NA	NA
chr1	198201682	198266370	+	8	85,141,63,111,109,108,95,114	NEK7	hsa_circ_0015803	64688	826	1	Cancer_specific	Exclusively_altered_in_LUAD	NA	NA	NA	NA	NA	NA	NA	NA	-1.35065	0.0055979	0.0349797	Down	-1.31566	0.00658198	0.0584494	None	NA	NA	NA	NA	NA	NA	NA	NA	NA	NA	NA	NA
chr1	246754813	246755243	+	1	430	CNST	hsa_circ_0017310	430	430	1	Cancer_specific	Exclusively_altered_in_CRC	NA	NA	NA	NA	NA	NA	NA	NA	-0.101432	0.798077	0.894602	None	NA	NA	NA	NA	-0.539631	0.324165	0.565461	None	NA	NA	NA	NA	-1.36764	0.007146	0.0248865	Down
chr4	25351113	25366127	+	5	151,101,122,76,52	ZCCHC4	hsa_circ_0007107	15014	502	2	circRNA_altered_in_2_cancer_types	Consistently_altered	NA	NA	NA	NA	NA	NA	NA	NA	-1.84414	2.86727e-05	0.000457955	Down	NA	NA	NA	NA	-2.166	0.00533935	0.0639695	None	NA	NA	NA	NA	-3.72542	3.8294e-12	2.76843e-10	Down
chr4	25848915	25849486	-	1	571	SEL1L3	hsa_circ_0126072	571	571	2	circRNA_altered_in_2_cancer_types	Consistently_altered	NA	NA	NA	NA	NA	NA	NA	NA	1.57024	1.51235e-05	0.000276614	Up	0.811183	0.098944	0.345696	None	1.5164	0.0202527	0.124125	None	NA	NA	NA	NA	1.35831	0.000583367	0.00325796	Up
chr4	186168447	186209236	+	5	85,217,173,187,71	SNX25	hsa_circ_0003237	40789	733	2	circRNA_altered_in_2_cancer_types	Consistently_altered	NA	NA	NA	NA	NA	NA	NA	NA	2.55135	3.52889e-07	1.33392e-05	Up	1.80932	1.21943e-05	0.000424313	Up	NA	NA	NA	NA	NA	NA	NA	NA	NA	NA	NA	NA
chr13	24796956	24798720	+	1	1764	RP11-307N16.6	hsa_circ_0004865	1764	1764	2	circRNA_altered_in_2_cancer_types	Inconsistently_altered	NA	NA	NA	NA	NA	NA	NA	NA	NA	NA	NA	NA	-1.48121	0.000646755	0.010084	Down	NA	NA	NA	NA	0.246056	0.573267	0.737943	None	2.62208	3.30749e-09	1.09862e-07	Up
chr13	41400641	41429951	-	5	73,119,94,78,61	TPTE2P5	hsa_circ_0100444	29310	425	1	Cancer_specific	Exclusively_altered_in_CRC	NA	NA	NA	NA	NA	NA	NA	NA	NA	NA	NA	NA	0.0480156	0.847702	0.93731	None	0.970336	0.055005	0.208106	None	NA	NA	NA	NA	1.04648	0.0141088	0.0444607	Up
chr13	75900332	75923438	-	6	227,75,120,111,92,133	TBC1D4	hsa_circ_0002917	23106	758	1	Cancer_specific	Exclusively_altered_in_THCA	NA	NA	NA	NA	NA	NA	NA	NA	NA	NA	NA	NA	-1.66292	3.14575e-06	0.000141145	Down	NA	NA	NA	NA	NA	NA	NA	NA	NA	NA	NA	NA
chr12	40696590	40697936	+	2	94,187	LRRK2	hsa_circ_0025887	1346	281	1	Cancer_specific	Exclusively_altered_in_THCA	NA	NA	NA	NA	NA	NA	NA	NA	NA	NA	NA	NA	2.66462	0.00015136	0.00322926	Up	NA	NA	NA	NA	NA	NA	NA	NA	NA	NA	NA	NA
chr12	64011083	64041145	-	7	87,78,100,92,58,94,121	DPY19L2	hsa_circ_0004909	30062	630	1	Cancer_specific	Exclusively_altered_in_THCA	NA	NA	NA	NA	NA	NA	NA	NA	NA	NA	NA	NA	-1.70984	0.000550202	0.00884994	Down	-1.13382	0.215352	0.443273	None	NA	NA	NA	NA	NA	NA	NA	NA
chr12	100166699	100219167	-	7	167,114,102,76,297,157,81	ANKS1B	hsa_circ_0096922	52468	994	1	Cancer_specific	Exclusively_altered_in_THCA	NA	NA	NA	NA	NA	NA	NA	NA	NA	NA	NA	NA	-1.58729	0.000394608	0.00693616	Down	NA	NA	NA	NA	NA	NA	NA	NA	NA	NA	NA	NA
chr12	100200181	100219167	-	3	297,157,81	ANKS1B	hsa_circ_0027842	18986	535	1	Cancer_specific	Exclusively_altered_in_THCA	NA	NA	NA	NA	NA	NA	NA	NA	NA	NA	NA	NA	-2.17902	0.000450937	0.00768848	Down	NA	NA	NA	NA	NA	NA	NA	NA	NA	NA	NA	NA
chr12	102107867	102110590	+	4	148,142,193,85	CHPT1	hsa_circ_0006660	2723	568	1	Cancer_specific	Exclusively_altered_in_THCA	NA	NA	NA	NA	NA	NA	NA	NA	NA	NA	NA	NA	1.21191	0.00109452	0.0150496	Up	-0.239861	0.681718	0.846555	None	NA	NA	NA	NA	NA	NA	NA	NA
chr11	30516842	30557722	-	2	226,182	MPPED2	hsa_circ_0021549	40880	408	1	Cancer_specific	Exclusively_altered_in_THCA	NA	NA	NA	NA	NA	NA	NA	NA	NA	NA	NA	NA	-2.48703	4.58377e-07	3.12613e-05	Down	-3.02065	0.0123069	0.0962074	None	NA	NA	NA	NA	NA	NA	NA	NA
chr11	30516842	30602041	-	3	226,182,249	MPPED2	hsa_circ_0021550	85199	657	1	Cancer_specific	Exclusively_altered_in_THCA	NA	NA	NA	NA	NA	NA	NA	NA	NA	NA	NA	NA	-1.95282	0.00020804	0.00427359	Down	NA	NA	NA	NA	NA	NA	NA	NA	NA	NA	NA	NA
chr11	30557540	30602041	-	2	182,249	MPPED2	hsa_circ_0021553	44501	431	1	Cancer_specific	Exclusively_altered_in_THCA	NA	NA	NA	NA	NA	NA	NA	NA	NA	NA	NA	NA	-2.36107	6.49215e-06	0.00026355	Down	NA	NA	NA	NA	NA	NA	NA	NA	NA	NA	NA	NA
chr11	125848198	125893432	-	17	80,281,222,123,106,182,204,132,175,299,354,270,288,144,147,273,137	CDON	hsa_circ_0024803	45234	3417	1	Cancer_specific	Exclusively_altered_in_THCA	NA	NA	NA	NA	NA	NA	NA	NA	NA	NA	NA	NA	-2.02315	0.00012457	0.00283188	Down	-1.71248	0.112545	0.313482	None	NA	NA	NA	NA	NA	NA	NA	NA
chr17	131558	177370	-	4	87,130,144,113	RPH3AL	hsa_circ_0041150	45812	474	1	Cancer_specific	Exclusively_altered_in_HCC	NA	NA	NA	NA	NA	NA	NA	NA	NA	NA	NA	NA	0.48374	0.207471	0.501454	None	NA	NA	NA	NA	-1.64523	2.45457e-05	0.000691801	Down	NA	NA	NA	NA
chr15	93467550	93499879	+	14	232,87,62,108,141,134,226,101,45,179,125,217,90,191	CHD2	hsa_circ_0036963	32329	1938	1	Cancer_specific	Exclusively_altered_in_THCA	NA	NA	NA	NA	NA	NA	NA	NA	NA	NA	NA	NA	1.06788	0.00135776	0.0182106	Up	NA	NA	NA	NA	NA	NA	NA	NA	NA	NA	NA	NA
chr14	45481177	45523752	+	9	101,90,176,154,154,106,236,127,119	FAM179B	hsa_circ_0031760	42575	1263	1	Cancer_specific	Exclusively_altered_in_THCA	NA	NA	NA	NA	NA	NA	NA	NA	NA	NA	NA	NA	-1.41922	0.00340324	0.034955	Down	NA	NA	NA	NA	NA	NA	NA	NA	NA	NA	NA	NA
chr19	30476129	30503438	+	8	79,136,92,58,169,349,143,247	URI1	hsa_circ_0050336	27309	1273	1	Cancer_specific	Exclusively_altered_in_THCA	NA	NA	NA	NA	NA	NA	NA	NA	NA	NA	NA	NA	-1.04477	0.00250405	0.0279046	Down	-0.184447	0.839772	0.924887	None	NA	NA	NA	NA	NA	NA	NA	NA
chr18	8076452	8114825	+	5	110,202,103,274,37	PTPRM	hsa_circ_0003063	38373	726	1	Cancer_specific	Exclusively_altered_in_THCA	NA	NA	NA	NA	NA	NA	NA	NA	NA	NA	NA	NA	1.26506	2.73363e-05	0.000863119	Up	NA	NA	NA	NA	NA	NA	NA	NA	NA	NA	NA	NA
chr6	154520801	154535410	-	3	373,86,59	IPCEF1	hsa_circ_0078336	14609	518	1	Cancer_specific	Exclusively_altered_in_THCA	NA	NA	NA	NA	NA	NA	NA	NA	NA	NA	NA	NA	-2.3838	2.93317e-07	2.17437e-05	Down	NA	NA	NA	NA	NA	NA	NA	NA	NA	NA	NA	NA
chr6	154520801	154544377	-	5	373,86,59,72,74	IPCEF1	hsa_circ_0131108	23576	664	1	Cancer_specific	Exclusively_altered_in_THCA	NA	NA	NA	NA	NA	NA	NA	NA	NA	NA	NA	NA	-2.40309	7.00562e-07	4.26592e-05	Down	NA	NA	NA	NA	NA	NA	NA	NA	NA	NA	NA	NA
chr6	159128261	159146669	+	3	52,70,135	SYTL3	hsa_circ_0131220	18408	257	1	Cancer_specific	Exclusively_altered_in_THCA	NA	NA	NA	NA	NA	NA	NA	NA	NA	NA	NA	NA	-1.38773	0.00188164	0.0227531	Down	NA	NA	NA	NA	NA	NA	NA	NA	NA	NA	NA	NA
chr8	92301363	92307931	+	2	111,173	SLC26A7	hsa_circ_0137287	6568	284	1	Cancer_specific	Exclusively_altered_in_THCA	NA	NA	NA	NA	NA	NA	NA	NA	NA	NA	NA	NA	-2.04458	7.09804e-09	8.0681e-07	Down	NA	NA	NA	NA	NA	NA	NA	NA	NA	NA	NA	NA
chr8	92301363	92330608	+	3	111,173,165	SLC26A7	hsa_circ_0137288	29245	449	1	Cancer_specific	Exclusively_altered_in_THCA	NA	NA	NA	NA	NA	NA	NA	NA	NA	NA	NA	NA	-2.33201	8.65113e-07	4.77864e-05	Down	NA	NA	NA	NA	NA	NA	NA	NA	NA	NA	NA	NA
chr8	92355580	92382061	+	7	114,78,96,107,67,138,49	SLC26A7	hsa_circ_0137290	26481	649	1	Cancer_specific	Exclusively_altered_in_THCA	NA	NA	NA	NA	NA	NA	NA	NA	NA	NA	NA	NA	-1.95316	6.21322e-05	0.00165524	Down	NA	NA	NA	NA	NA	NA	NA	NA	NA	NA	NA	NA
chr8	92355580	92401666	+	8	114,78,96,107,67,138,49,101	SLC26A7	hsa_circ_0137291	46086	750	1	Cancer_specific	Exclusively_altered_in_THCA	NA	NA	NA	NA	NA	NA	NA	NA	NA	NA	NA	NA	-1.57783	0.000276737	0.00532124	Down	NA	NA	NA	NA	NA	NA	NA	NA	NA	NA	NA	NA
chr8	92355580	92406267	+	10	114,78,96,107,67,138,49,101,55,104	SLC26A7	hsa_circ_0137292	50687	909	1	Cancer_specific	Exclusively_altered_in_THCA	NA	NA	NA	NA	NA	NA	NA	NA	NA	NA	NA	NA	-2.45158	9.6566e-07	4.98924e-05	Down	NA	NA	NA	NA	NA	NA	NA	NA	NA	NA	NA	NA
chr8	121013763	121021372	+	4	186,135,71,105	DEPTOR	hsa_circ_0085412	7609	497	1	Cancer_specific	Exclusively_altered_in_THCA	NA	NA	NA	NA	NA	NA	NA	NA	NA	NA	NA	NA	-1.36004	0.000962339	0.0135602	Down	NA	NA	NA	NA	NA	NA	NA	NA	NA	NA	NA	NA
chr22	44107354	44168983	-	7	149,125,113,137,67,89,212	EFCAB6	hsa_circ_0116742	61629	892	1	Cancer_specific	Exclusively_altered_in_THCA	NA	NA	NA	NA	NA	NA	NA	NA	NA	NA	NA	NA	-1.31048	0.000431135	0.0074251	Down	NA	NA	NA	NA	NA	NA	NA	NA	NA	NA	NA	NA
chr7	37250990	37382367	-	12	132,123,51,79,152,100,36,170,51,73,41,151	ELMO1	hsa_circ_0079891	131377	1159	1	Cancer_specific	Exclusively_altered_in_THCA	NA	NA	NA	NA	NA	NA	NA	NA	NA	NA	NA	NA	-2.35682	1.8335e-05	0.000589833	Down	NA	NA	NA	NA	NA	NA	NA	NA	NA	NA	NA	NA
chr7	84685032	84697600	-	3	143,129,94	SEMA3D	hsa_circ_0080947	12568	366	1	Cancer_specific	Exclusively_altered_in_THCA	NA	NA	NA	NA	NA	NA	NA	NA	NA	NA	NA	NA	-2.71462	3.24889e-08	3.07742e-06	Down	NA	NA	NA	NA	NA	NA	NA	NA	NA	NA	NA	NA
chr7	107312582	107315554	+	3	111,185,165	SLC26A4	hsa_circ_0132980	2972	461	1	Cancer_specific	Exclusively_altered_in_THCA	NA	NA	NA	NA	NA	NA	NA	NA	NA	NA	NA	NA	-1.73962	4.48186e-05	0.00127951	Down	NA	NA	NA	NA	NA	NA	NA	NA	NA	NA	NA	NA
chr5	50055476	50093067	+	11	90,71,78,95,61,91,67,126,565,51,96	PARP8	hsa_circ_0072433	37591	1391	1	Cancer_specific	Exclusively_altered_in_THCA	NA	NA	NA	NA	NA	NA	NA	NA	NA	NA	NA	NA	-1.72042	4.50267e-05	0.00127951	Down	NA	NA	NA	NA	NA	NA	NA	NA	NA	NA	NA	NA
chr5	123979203	124036962	-	5	173,418,2455,88,256	ZNF608	hsa_circ_0073718	57759	3390	1	Cancer_specific	Exclusively_altered_in_THCA	NA	NA	NA	NA	NA	NA	NA	NA	NA	NA	NA	NA	1.38619	0.0039677	0.0400292	Up	NA	NA	NA	NA	NA	NA	NA	NA	NA	NA	NA	NA
chr3	136117590	136221621	-	15	81,88,71,204,90,93,104,118,115,108,80,99,124,74,152	STAG1	hsa_circ_0067475	104031	1601	1	Cancer_specific	Exclusively_altered_in_THCA	NA	NA	NA	NA	NA	NA	NA	NA	NA	NA	NA	NA	-1.34958	0.000656498	0.010084	Down	NA	NA	NA	NA	NA	NA	NA	NA	NA	NA	NA	NA
chr2	159165944	159201830	-	7	207,139,182,96,152,83,104	CCDC148	hsa_circ_0056768	35886	963	1	Cancer_specific	Exclusively_altered_in_THCA	NA	NA	NA	NA	NA	NA	NA	NA	NA	NA	NA	NA	1.63695	4.32684e-09	6.08105e-07	Up	NA	NA	NA	NA	NA	NA	NA	NA	NA	NA	NA	NA
chr1	91840914	91851391	-	9	89,201,159,78,152,133,71,48,260	HFM1	hsa_circ_0114450	10477	1191	1	Cancer_specific	Exclusively_altered_in_THCA	NA	NA	NA	NA	NA	NA	NA	NA	NA	NA	NA	NA	-1.43527	0.00103593	0.0144776	Down	NA	NA	NA	NA	NA	NA	NA	NA	NA	NA	NA	NA
chr1	155447676	155491409	-	2	4564,519	ASH1L	hsa_circ_0014591	43733	5083	1	Cancer_specific	Exclusively_altered_in_HCC	NA	NA	NA	NA	NA	NA	NA	NA	NA	NA	NA	NA	0.338939	0.328397	0.627006	None	0.698047	0.236665	0.469562	None	1.27107	0.00258583	0.0197816	Up	0.217557	0.627264	0.765549	None
chr1	243327585	243388623	-	12	1833,127,150,294,164,477,135,163,59,79,90,146	CEP170	hsa_circ_0017227	61038	3717	1	Cancer_specific	Exclusively_altered_in_THCA	NA	NA	NA	NA	NA	NA	NA	NA	NA	NA	NA	NA	-1.13857	0.000134799	0.00302411	Down	NA	NA	NA	NA	NA	NA	NA	NA	NA	NA	NA	NA
chr4	149356255	149358014	-	1	1759	NR3C2	hsa_circ_0071127	1759	1759	1	Cancer_specific	Exclusively_altered_in_HCC	NA	NA	NA	NA	NA	NA	NA	NA	NA	NA	NA	NA	-0.834572	0.00300844	0.0324645	None	-1.64818	0.0170438	0.113895	None	-1.83225	9.66276e-05	0.0017248	Down	-0.202646	0.613551	0.756323	None
chr13	33016524	33018263	-	1	1739	N4BP2L2	hsa_circ_0100263	1739	1739	1	Cancer_specific	Exclusively_altered_in_THCA	NA	NA	NA	NA	NA	NA	NA	NA	NA	NA	NA	NA	1.36608	0.000311835	0.00590754	Up	NA	NA	NA	NA	NA	NA	NA	NA	NA	NA	NA	NA
chr17	60087910	60112969	-	6	684,111,163,195,198,146	MED13	hsa_circ_0107372	25059	1497	1	Cancer_specific	Exclusively_altered_in_THCA	NA	NA	NA	NA	NA	NA	NA	NA	NA	NA	NA	NA	2.42446	1.00916e-07	8.19345e-06	Up	NA	NA	NA	NA	NA	NA	NA	NA	NA	NA	NA	NA
chr17	60106901	60140662	-	7	111,163,195,198,146,169,235	MED13	hsa_circ_0107375	33761	1217	1	Cancer_specific	Exclusively_altered_in_THCA	NA	NA	NA	NA	NA	NA	NA	NA	NA	NA	NA	NA	1.66529	0.00175726	0.0220304	Up	NA	NA	NA	NA	NA	NA	NA	NA	NA	NA	NA	NA
chr15	50940883	50955243	-	3	199,39,80	TRPM7	hsa_circ_0007775	14360	318	1	Cancer_specific	Exclusively_altered_in_HCC	NA	NA	NA	NA	NA	NA	NA	NA	NA	NA	NA	NA	0.118447	0.770757	0.903189	None	NA	NA	NA	NA	-1.05171	0.00719557	0.0432947	Down	NA	NA	NA	NA
chr14	55168779	55204005	+	2	519,264	SAMD4A	hsa_circ_0002612	35226	783	1	Cancer_specific	Exclusively_altered_in_THCA	NA	NA	NA	NA	NA	NA	NA	NA	NA	NA	NA	NA	3.00425	3.84539e-07	2.73183e-05	Up	NA	NA	NA	NA	NA	NA	NA	NA	NA	NA	NA	NA
chrX	123587186	123695667	-	9	155,233,250,144,268,262,120,217,147	TENM1	hsa_circ_0091470	108481	1796	1	Cancer_specific	Exclusively_altered_in_THCA	NA	NA	NA	NA	NA	NA	NA	NA	NA	NA	NA	NA	4.93425	1.50142e-13	6.3998e-11	Up	NA	NA	NA	NA	NA	NA	NA	NA	NA	NA	NA	NA
chr5	128320825	128326157	+	3	204,159,125	SLC27A6	hsa_circ_0127839	5332	488	1	Cancer_specific	Exclusively_altered_in_THCA	NA	NA	NA	NA	NA	NA	NA	NA	NA	NA	NA	NA	3.4815	4.63657e-09	6.08105e-07	Up	NA	NA	NA	NA	NA	NA	NA	NA	NA	NA	NA	NA
chr4	186241886	186267804	+	6	132,273,165,132,141,114	SNX25	hsa_circ_0125935	25918	957	1	Cancer_specific	Exclusively_altered_in_THCA	NA	NA	NA	NA	NA	NA	NA	NA	NA	NA	NA	NA	1.90927	2.97308e-06	0.000140549	Up	NA	NA	NA	NA	NA	NA	NA	NA	NA	NA	NA	NA
chr13	42860121	42882745	+	8	50,100,117,48,135,265,4501,156	AKAP11	hsa_circ_0100514	22624	5372	2	circRNA_altered_in_2_cancer_types	Consistently_altered	NA	NA	NA	NA	NA	NA	NA	NA	NA	NA	NA	NA	NA	NA	NA	NA	2.35119	0.0019659	0.0349931	Up	NA	NA	NA	NA	1.65997	0.000121973	0.000837455	Up
chr12	12672795	12674397	-	2	139,593	DUSP16	hsa_circ_0003855	1602	732	1	Cancer_specific	Exclusively_altered_in_CRC	NA	NA	NA	NA	NA	NA	NA	NA	NA	NA	NA	NA	NA	NA	NA	NA	0.881904	0.18387	0.409598	None	-0.477871	0.146672	0.337818	None	1.5717	4.30014e-06	4.80443e-05	Up
chr12	26780965	26869175	-	18	130,194,151,145,252,186,120,173,162,142,161,100,152,45,96,147,84,99	ITPR2	hsa_circ_0098228	88210	2539	2	circRNA_altered_in_2_cancer_types	Consistently_altered	NA	NA	NA	NA	NA	NA	NA	NA	NA	NA	NA	NA	NA	NA	NA	NA	-2.80848	0.00139351	0.0267561	Down	NA	NA	NA	NA	-3.76336	2.71143e-11	1.66617e-09	Down
chr12	83289596	83290425	+	1	829	TMTC2	hsa_circ_0099366	829	829	1	Cancer_specific	Exclusively_altered_in_CRC	NA	NA	NA	NA	NA	NA	NA	NA	NA	NA	NA	NA	NA	NA	NA	NA	-0.483716	0.543902	0.745273	None	NA	NA	NA	NA	-1.48927	0.00041857	0.00244963	Down
chr12	109687788	109696913	+	7	121,111,144,121,97,97,136	ACACB	hsa_circ_0028129	9125	827	3	circRNA_altered_in_3_cancer_types	Consistently_altered	NA	NA	NA	NA	NA	NA	NA	NA	NA	NA	NA	NA	NA	NA	NA	NA	-3.33501	7.3182e-05	0.00547109	Down	-1.56483	1.75254e-05	0.000536277	Down	-2.86587	7.63764e-07	1.1128e-05	Down
chr11	94528176	94533477	+	2	150,922	AMOTL1	hsa_circ_0000350	5301	1072	2	circRNA_altered_in_2_cancer_types	Consistently_altered	NA	NA	NA	NA	NA	NA	NA	NA	NA	NA	NA	NA	NA	NA	NA	NA	-2.28983	0.000104152	0.00695215	Down	NA	NA	NA	NA	-2.04163	0.00030558	0.00183199	Down
chr11	94554695	94564707	+	3	292,145,90	AMOTL1	hsa_circ_0008648	10012	527	1	Cancer_specific	Exclusively_altered_in_GC	NA	NA	NA	NA	NA	NA	NA	NA	NA	NA	NA	NA	NA	NA	NA	NA	-2.13734	0.00334502	0.0483171	Down	NA	NA	NA	NA	NA	NA	NA	NA
chr11	122953792	122955421	-	3	123,168,202	CLMP	hsa_circ_0003997	1629	493	1	Cancer_specific	Exclusively_altered_in_CRC	NA	NA	NA	NA	NA	NA	NA	NA	NA	NA	NA	NA	NA	NA	NA	NA	-1.57764	0.0600435	0.219182	None	NA	NA	NA	NA	-1.56271	0.00377926	0.0148393	Down
chr10	31661946	31791437	+	6	156,162,143,201,63,162	ZEB1	hsa_circ_0004126	129491	887	1	Cancer_specific	Exclusively_altered_in_CRC	NA	NA	NA	NA	NA	NA	NA	NA	NA	NA	NA	NA	NA	NA	NA	NA	-1.25187	0.0687984	0.233596	None	NA	NA	NA	NA	-2.1786	0.000724063	0.00390295	Down
chr10	88635623	88659883	+	5	219,163,103,97,100	BMPR1A	hsa_circ_0006930	24260	682	2	circRNA_altered_in_2_cancer_types	Consistently_altered	NA	NA	NA	NA	NA	NA	NA	NA	NA	NA	NA	NA	NA	NA	NA	NA	-3.06005	0.000292317	0.0114544	Down	NA	NA	NA	NA	-2.29875	8.75863e-05	0.000629495	Down
chr10	117849251	117856275	-	3	182,135,110	GFRA1	hsa_circ_0005239	7024	427	1	Cancer_specific	Exclusively_altered_in_HCC	NA	NA	NA	NA	NA	NA	NA	NA	NA	NA	NA	NA	NA	NA	NA	NA	-1.21314	0.0730142	0.243251	None	-1.91723	0.000105492	0.00179336	Down	NA	NA	NA	NA
chr10	134503895	134523960	+	4	64,104,53,120	INPP5A	hsa_circ_0020545	20065	341	1	Cancer_specific	Exclusively_altered_in_CRC	NA	NA	NA	NA	NA	NA	NA	NA	NA	NA	NA	NA	NA	NA	NA	NA	-0.200605	0.731349	0.87453	None	NA	NA	NA	NA	-1.83895	0.00186664	0.00849666	Down
chr16	10524467	10525312	+	1	845	ATF7IP2	hsa_circ_0037807	845	845	1	Cancer_specific	Exclusively_altered_in_HCC	NA	NA	NA	NA	NA	NA	NA	NA	NA	NA	NA	NA	NA	NA	NA	NA	0.096878	0.879693	0.942744	None	-1.53504	0.000217756	0.00310955	Down	NA	NA	NA	NA
chr14	80163972	80271542	+	2	308,88	NRXN3	hsa_circ_0032813	107570	396	1	Cancer_specific	Exclusively_altered_in_CRC	NA	NA	NA	NA	NA	NA	NA	NA	NA	NA	NA	NA	NA	NA	NA	NA	-1.73097	0.0231149	0.13073	None	NA	NA	NA	NA	-3.28928	3.81278e-07	6.33231e-06	Down
chr19	46832463	46834530	+	2	272,118	HIF3A	hsa_circ_0109731	2067	390	1	Cancer_specific	Exclusively_altered_in_CRC	NA	NA	NA	NA	NA	NA	NA	NA	NA	NA	NA	NA	NA	NA	NA	NA	-1.76759	0.0102708	0.0886741	None	NA	NA	NA	NA	-2.73452	5.23273e-05	0.000399443	Down
chr6	168910594	168949883	+	6	172,107,100,48,84,75	SMOC2	hsa_circ_0131341	39289	586	1	Cancer_specific	Exclusively_altered_in_GC	NA	NA	NA	NA	NA	NA	NA	NA	NA	NA	NA	NA	NA	NA	NA	NA	-2.3657	4.44736e-05	0.00515269	Down	NA	NA	NA	NA	NA	NA	NA	NA
chr21	42609439	42629253	+	6	217,129,135,102,150,169	BACE2	hsa_circ_0061776	19814	902	1	Cancer_specific	Exclusively_altered_in_CRC	NA	NA	NA	NA	NA	NA	NA	NA	NA	NA	NA	NA	NA	NA	NA	NA	-0.270761	0.626191	0.806582	None	NA	NA	NA	NA	1.58416	1.83165e-06	2.32072e-05	Up
chrX	10534927	10535643	-	1	716	MID1	hsa_circ_0007933	716	716	1	Cancer_specific	Exclusively_altered_in_CRC	NA	NA	NA	NA	NA	NA	NA	NA	NA	NA	NA	NA	NA	NA	NA	NA	-0.16367	0.743448	0.883384	None	NA	NA	NA	NA	-1.09675	0.00027836	0.00170201	Down
chrX	32235032	32328393	-	3	148,173,195	DMD	hsa_circ_0140201	93361	516	1	Cancer_specific	Exclusively_altered_in_CRC	NA	NA	NA	NA	NA	NA	NA	NA	NA	NA	NA	NA	NA	NA	NA	NA	-2.03354	0.0284273	0.142824	None	NA	NA	NA	NA	-3.10384	3.50301e-06	4.13962e-05	Down
chrX	32305645	32328393	-	2	173,195	DMD	hsa_circ_0140202	22748	368	1	Cancer_specific	Exclusively_altered_in_CRC	NA	NA	NA	NA	NA	NA	NA	NA	NA	NA	NA	NA	NA	NA	NA	NA	-1.4983	0.0120244	0.095632	None	NA	NA	NA	NA	-3.21963	2.38721e-08	5.75272e-07	Down
chrX	32563275	32591963	-	4	176,180,108,102	DMD	hsa_circ_0140213	28688	566	2	circRNA_altered_in_2_cancer_types	Consistently_altered	NA	NA	NA	NA	NA	NA	NA	NA	NA	NA	NA	NA	NA	NA	NA	NA	-2.52367	0.00203001	0.0354588	Down	NA	NA	NA	NA	-4.1764	5.18412e-11	2.6547e-09	Down
chr9	43815784	43828221	+	5	204,185,144,262,144	CNTNAP3B	hsa_circ_0087110	12437	939	1	Cancer_specific	Exclusively_altered_in_CRC	NA	NA	NA	NA	NA	NA	NA	NA	NA	NA	NA	NA	NA	NA	NA	NA	-2.98208	0.00851173	0.0807534	None	NA	NA	NA	NA	-3.02371	2.4716e-05	0.000215432	Down
chr22	31491288	31493324	+	5	153,76,165,63,70	SMTN	hsa_circ_0062874	2036	527	1	Cancer_specific	Exclusively_altered_in_CRC	NA	NA	NA	NA	NA	NA	NA	NA	NA	NA	NA	NA	NA	NA	NA	NA	-2.23597	0.0372991	0.163578	None	NA	NA	NA	NA	-3.15068	4.99609e-06	5.4338e-05	Down
chr20	54956488	54961589	-	4	139,192,55,277	AURKA	hsa_circ_0008777	5101	663	2	circRNA_altered_in_2_cancer_types	Consistently_altered	NA	NA	NA	NA	NA	NA	NA	NA	NA	NA	NA	NA	NA	NA	NA	NA	3.14829	3.12679e-05	0.00486998	Up	NA	NA	NA	NA	2.23741	8.48563e-09	2.31752e-07	Up
chr5	6737622	6746540	+	6	124,47,121,108,129,214	PAPD7	hsa_circ_0008903	8918	743	1	Cancer_specific	Exclusively_altered_in_GC	NA	NA	NA	NA	NA	NA	NA	NA	NA	NA	NA	NA	NA	NA	NA	NA	2.07994	0.00120834	0.0240248	Up	NA	NA	NA	NA	NA	NA	NA	NA
chr5	52145198	52161651	+	5	121,113,89,112,128	ITGA1	hsa_circ_0129109	16453	563	1	Cancer_specific	Exclusively_altered_in_GC	NA	NA	NA	NA	NA	NA	NA	NA	NA	NA	NA	NA	NA	NA	NA	NA	-3.11781	0.000269199	0.0111325	Down	NA	NA	NA	NA	NA	NA	NA	NA
chr5	127466758	127477673	+	6	140,111,109,128,85,152	SLC12A2	hsa_circ_0073762	10915	725	1	Cancer_specific	Exclusively_altered_in_CRC	NA	NA	NA	NA	NA	NA	NA	NA	NA	NA	NA	NA	NA	NA	NA	NA	1.20254	0.0491962	0.193682	None	NA	NA	NA	NA	2.15837	4.91953e-11	2.62874e-09	Up
chr3	135719900	135722335	+	1	2435	PPP2R3A	hsa_circ_0122039	2435	2435	1	Cancer_specific	Exclusively_altered_in_CRC	NA	NA	NA	NA	NA	NA	NA	NA	NA	NA	NA	NA	NA	NA	NA	NA	-1.80645	0.0225108	0.129057	None	NA	NA	NA	NA	-2.73938	8.66956e-06	8.66251e-05	Down
chr2	48807725	48818994	+	2	1977,203	STON1	hsa_circ_0054522	11269	2180	1	Cancer_specific	Exclusively_altered_in_CRC	NA	NA	NA	NA	NA	NA	NA	NA	NA	NA	NA	NA	NA	NA	NA	NA	-2.43641	0.00669669	0.0703153	None	NA	NA	NA	NA	-1.48933	0.00281749	0.0116589	Down
chr2	48847989	48898819	+	7	102,124,56,85,590,261,90	STON1	hsa_circ_0120232	50830	1308	1	Cancer_specific	Exclusively_altered_in_CRC	NA	NA	NA	NA	NA	NA	NA	NA	NA	NA	NA	NA	NA	NA	NA	NA	-3.0944	0.00586283	0.0660491	None	NA	NA	NA	NA	-2.87521	0.00424484	0.016354	Down
chr2	220315857	220329330	+	5	144,183,176,89,176	SPEG	hsa_circ_0058375	13473	768	1	Cancer_specific	Exclusively_altered_in_CRC	NA	NA	NA	NA	NA	NA	NA	NA	NA	NA	NA	NA	NA	NA	NA	NA	-1.04663	0.256272	0.49439	None	NA	NA	NA	NA	-3.66023	7.58565e-08	1.58013e-06	Down
chr2	238647874	238668848	+	9	78,36,126,72,171,93,93,93,142	LRRFIP1	hsa_circ_0119391	20974	904	1	Cancer_specific	Exclusively_altered_in_GC	NA	NA	NA	NA	NA	NA	NA	NA	NA	NA	NA	NA	NA	NA	NA	NA	-2.88667	0.000302586	0.0115415	Down	NA	NA	NA	NA	NA	NA	NA	NA
chr2	240078347	240085619	-	2	122,121	HDAC4	hsa_circ_0058905	7272	243	1	Cancer_specific	Exclusively_altered_in_CRC	NA	NA	NA	NA	NA	NA	NA	NA	NA	NA	NA	NA	NA	NA	NA	NA	-0.761175	0.316726	0.556877	None	NA	NA	NA	NA	-1.8922	0.000546051	0.00310693	Down
chr1	32049061	32051086	+	5	115,124,151,190,46	TINAGL1	hsa_circ_0011293	2025	626	1	Cancer_specific	Exclusively_altered_in_CRC	NA	NA	NA	NA	NA	NA	NA	NA	NA	NA	NA	NA	NA	NA	NA	NA	-3.49167	0.00663612	0.0700729	None	NA	NA	NA	NA	-3.51365	2.75175e-07	4.83129e-06	Down
chr1	236195700	236201553	-	2	252,150	NID1	hsa_circ_0017111	5853	402	1	Cancer_specific	Exclusively_altered_in_CRC	NA	NA	NA	NA	NA	NA	NA	NA	NA	NA	NA	NA	NA	NA	NA	NA	-1.93391	0.0152244	0.106571	None	NA	NA	NA	NA	-3.32984	6.30918e-08	1.43311e-06	Down
chr4	151271143	151412187	-	8	168,153,120,141,113,116,103,118	LRBA	hsa_circ_0071152	141044	1032	1	Cancer_specific	Exclusively_altered_in_CRC	NA	NA	NA	NA	NA	NA	NA	NA	NA	NA	NA	NA	NA	NA	NA	NA	-2.89196	0.021836	0.126565	None	NA	NA	NA	NA	-3.70996	5.32734e-09	1.55888e-07	Down
chr4	151356740	151412187	-	6	120,141,113,116,103,118	LRBA	hsa_circ_0125514	55447	711	1	Cancer_specific	Exclusively_altered_in_CRC	NA	NA	NA	NA	NA	NA	NA	NA	NA	NA	NA	NA	NA	NA	NA	NA	-2.04131	0.0138561	0.101662	None	NA	NA	NA	NA	-4.33451	1.86335e-15	2.86257e-13	Down
chr4	169812072	169837178	+	6	136,99,222,150,95,133	PALLD	hsa_circ_0071410	25106	835	1	Cancer_specific	Exclusively_altered_in_CRC	NA	NA	NA	NA	NA	NA	NA	NA	NA	NA	NA	NA	NA	NA	NA	NA	-0.584004	0.314888	0.555213	None	NA	NA	NA	NA	-1.55645	0.00159724	0.00749238	Down
chr13	114174930	114193822	+	3	118,196,151	TMCO3	hsa_circ_0004361	18892	465	1	Cancer_specific	Exclusively_altered_in_HCC	NA	NA	NA	NA	NA	NA	NA	NA	NA	NA	NA	NA	NA	NA	NA	NA	2.02592	0.0214778	0.126565	None	2.71631	1.48759e-05	0.000497878	Up	NA	NA	NA	NA
chr12	56628607	56629484	+	3	163,170,141	SLC39A5	hsa_circ_0026920	877	474	1	Cancer_specific	Exclusively_altered_in_HCC	NA	NA	NA	NA	NA	NA	NA	NA	NA	NA	NA	NA	NA	NA	NA	NA	1.9043	0.390838	0.614949	None	-1.74167	2.77868e-05	0.000727671	Down	NA	NA	NA	NA
chr10	128768965	129046373	+	27	84,41,56,97,149,136,158,82,136,73,80,126,125,99,73,104,184,98,90,101,135,109,71,107,128,96,102	DOCK1	hsa_circ_0020398	277408	2840	1	Cancer_specific	Exclusively_altered_in_GC	NA	NA	NA	NA	NA	NA	NA	NA	NA	NA	NA	NA	NA	NA	NA	NA	4.25219	5.79702e-05	0.00515269	Up	NA	NA	NA	NA	NA	NA	NA	NA
chr9	102814698	102822454	-	3	116,40,73	ERP44	hsa_circ_0137538	7756	229	1	Cancer_specific	Exclusively_altered_in_CRC	NA	NA	NA	NA	NA	NA	NA	NA	NA	NA	NA	NA	NA	NA	NA	NA	1.17752	0.0782483	0.25346	None	NA	NA	NA	NA	1.2222	0.00772851	0.026606	Up
chr7	20193815	20201493	-	3	189,2042,123	MACC1	hsa_circ_0079534	7678	2354	2	circRNA_altered_in_2_cancer_types	Consistently_altered	NA	NA	NA	NA	NA	NA	NA	NA	NA	NA	NA	NA	NA	NA	NA	NA	2.78616	0.00105985	0.0230332	Up	NA	NA	NA	NA	4.53944	6.943e-19	2.13324e-16	Up
chr2	174223439	174224219	+	2	126,237	CDCA7	hsa_circ_0057123	780	363	1	Cancer_specific	Exclusively_altered_in_CRC	NA	NA	NA	NA	NA	NA	NA	NA	NA	NA	NA	NA	NA	NA	NA	NA	1.76134	0.0833629	0.260544	None	NA	NA	NA	NA	1.86718	2.57614e-06	3.13473e-05	Up
chr12	23998916	24048958	-	2	211,232	SOX5	hsa_circ_0098181	50042	443	1	Cancer_specific	Exclusively_altered_in_HCC	NA	NA	NA	NA	NA	NA	NA	NA	NA	NA	NA	NA	NA	NA	NA	NA	NA	NA	NA	NA	-1.36585	0.00507666	0.0336684	Down	NA	NA	NA	NA
chr11	68115314	68133170	+	4	397,198,197,132	LRP5	hsa_circ_0023182	17856	924	1	Cancer_specific	Exclusively_altered_in_HCC	NA	NA	NA	NA	NA	NA	NA	NA	NA	NA	NA	NA	NA	NA	NA	NA	NA	NA	NA	NA	1.46823	0.00104773	0.00995805	Up	NA	NA	NA	NA
chr17	27379937	27380613	+	2	214,183	PIPOX	hsa_circ_0042738	676	397	1	Cancer_specific	Exclusively_altered_in_HCC	NA	NA	NA	NA	NA	NA	NA	NA	NA	NA	NA	NA	NA	NA	NA	NA	NA	NA	NA	NA	-1.95338	0.000147113	0.00228346	Down	NA	NA	NA	NA
chr16	29367107	29376380	+	4	182,71,246,376	SNX29P2	hsa_circ_0038891	9273	875	1	Cancer_specific	Exclusively_altered_in_HCC	NA	NA	NA	NA	NA	NA	NA	NA	NA	NA	NA	NA	NA	NA	NA	NA	NA	NA	NA	NA	-1.41734	0.00685222	0.0414618	Down	NA	NA	NA	NA
chr16	89164998	89169167	+	3	173,686,156	ACSF3	hsa_circ_0006958	4169	1015	1	Cancer_specific	Exclusively_altered_in_CRC	NA	NA	NA	NA	NA	NA	NA	NA	NA	NA	NA	NA	NA	NA	NA	NA	NA	NA	NA	NA	-0.294675	0.56898	0.735075	None	1.45081	0.00241515	0.0104148	Up
chr18	60223435	60232329	+	6	95,84,58,136,65,95	ZCCHC2	hsa_circ_0108764	8894	533	1	Cancer_specific	Exclusively_altered_in_HCC	NA	NA	NA	NA	NA	NA	NA	NA	NA	NA	NA	NA	NA	NA	NA	NA	NA	NA	NA	NA	-1.53963	0.00026328	0.00366198	Down	NA	NA	NA	NA
chr8	17415803	17419619	+	3	103,206,167	SLC7A2	hsa_circ_0005805	3816	476	1	Cancer_specific	Exclusively_altered_in_HCC	NA	NA	NA	NA	NA	NA	NA	NA	NA	NA	NA	NA	NA	NA	NA	NA	NA	NA	NA	NA	-1.30087	0.00561835	0.0360315	Down	NA	NA	NA	NA
chrX	2871183	2876476	-	3	123,122,162	ARSE	hsa_circ_0004844	5293	407	2	circRNA_altered_in_2_cancer_types	Inconsistently_altered	NA	NA	NA	NA	NA	NA	NA	NA	NA	NA	NA	NA	NA	NA	NA	NA	NA	NA	NA	NA	-1.21951	0.000366192	0.00461402	Down	1.70311	0.000346678	0.0020484	Up
chr3	78763546	78767033	-	3	128,139,121	ROBO1	hsa_circ_0066568	3487	388	1	Cancer_specific	Exclusively_altered_in_HCC	NA	NA	NA	NA	NA	NA	NA	NA	NA	NA	NA	NA	NA	NA	NA	NA	NA	NA	NA	NA	2.92183	0.000137121	0.00215966	Up	NA	NA	NA	NA
chr2	64083439	64090062	+	3	128,108,88	UGP2	hsa_circ_0004227	6623	324	1	Cancer_specific	Exclusively_altered_in_HCC	NA	NA	NA	NA	NA	NA	NA	NA	NA	NA	NA	NA	NA	NA	NA	NA	NA	NA	NA	NA	-1.85269	4.48093e-07	2.82298e-05	Down	NA	NA	NA	NA
chr1	42730785	42789498	-	5	75,325,61,110,144	FOXJ3	hsa_circ_0113380	58713	715	1	Cancer_specific	Exclusively_altered_in_HCC	NA	NA	NA	NA	NA	NA	NA	NA	NA	NA	NA	NA	NA	NA	NA	NA	NA	NA	NA	NA	-1.0928	0.00432896	0.02972	Down	0.602278	0.0861785	0.180125	None
chr1	53443888	53453808	+	3	151,148,108	SCP2	hsa_circ_0012585	9920	407	1	Cancer_specific	Exclusively_altered_in_HCC	NA	NA	NA	NA	NA	NA	NA	NA	NA	NA	NA	NA	NA	NA	NA	NA	NA	NA	NA	NA	-3.43088	2.47434e-08	2.20835e-06	Down	NA	NA	NA	NA
chr1	57252847	57258476	-	3	34,162,748	C1orf168	hsa_circ_0113682	5629	944	1	Cancer_specific	Exclusively_altered_in_HCC	NA	NA	NA	NA	NA	NA	NA	NA	NA	NA	NA	NA	NA	NA	NA	NA	NA	NA	NA	NA	-1.64742	6.75821e-05	0.00141922	Down	NA	NA	NA	NA
chr12	23793745	24048958	-	7	86,121,69,173,87,211,232	SOX5	hsa_circ_0025624	255213	979	1	Cancer_specific	Exclusively_altered_in_HCC	NA	NA	NA	NA	NA	NA	NA	NA	NA	NA	NA	NA	NA	NA	NA	NA	NA	NA	NA	NA	-1.49372	0.000724732	0.00768503	Down	NA	NA	NA	NA
chr2	100623093	100625394	-	3	386,313,121	AFF3	hsa_circ_0001055	2301	820	1	Cancer_specific	Exclusively_altered_in_HCC	NA	NA	NA	NA	NA	NA	NA	NA	NA	NA	NA	NA	NA	NA	NA	NA	NA	NA	NA	NA	1.81296	0.00308482	0.0229434	Up	NA	NA	NA	NA
chr1	76211490	76216231	+	3	109,141,96	ACADM	hsa_circ_0012964	4741	346	1	Cancer_specific	Exclusively_altered_in_HCC	NA	NA	NA	NA	NA	NA	NA	NA	NA	NA	NA	NA	NA	NA	NA	NA	NA	NA	NA	NA	-1.25191	0.00618341	0.0389555	Down	NA	NA	NA	NA
chr17	4856089	4857140	+	4	96,59,70,134	ENO3	hsa_circ_0041638	1051	359	1	Cancer_specific	Exclusively_altered_in_HCC	NA	NA	NA	NA	NA	NA	NA	NA	NA	NA	NA	NA	NA	NA	NA	NA	NA	NA	NA	NA	-1.38773	0.00247065	0.0193143	Down	NA	NA	NA	NA
chr5	78324255	78329231	-	5	218,131,166,154,170	DMGDH	hsa_circ_0129713	4976	839	1	Cancer_specific	Exclusively_altered_in_HCC	NA	NA	NA	NA	NA	NA	NA	NA	NA	NA	NA	NA	NA	NA	NA	NA	NA	NA	NA	NA	-1.40801	0.000816856	0.00833193	Down	NA	NA	NA	NA
chr1	46032240	46032692	+	2	120,152	AKR1A1	hsa_circ_0000067	452	272	1	Cancer_specific	Exclusively_altered_in_HCC	NA	NA	NA	NA	NA	NA	NA	NA	NA	NA	NA	NA	NA	NA	NA	NA	NA	NA	NA	NA	-1.61278	0.0052561	0.0344377	Down	NA	NA	NA	NA
chr12	104200099	104208899	-	3	56,75,185	NT5DC3	hsa_circ_0097065	8800	316	1	Cancer_specific	Exclusively_altered_in_CRC	NA	NA	NA	NA	NA	NA	NA	NA	NA	NA	NA	NA	NA	NA	NA	NA	NA	NA	NA	NA	NA	NA	NA	NA	-2.05593	0.000902428	0.00476002	Down
chr16	583945	586142	+	2	53,114	CAPN15	hsa_circ_0008883	2197	167	1	Cancer_specific	Exclusively_altered_in_CRC	NA	NA	NA	NA	NA	NA	NA	NA	NA	NA	NA	NA	NA	NA	NA	NA	NA	NA	NA	NA	NA	NA	NA	NA	1.60776	0.00019014	0.00122346	Up
chr16	68300495	68309152	+	2	129,559	SLC7A6	hsa_circ_0005623	8657	688	1	Cancer_specific	Exclusively_altered_in_CRC	NA	NA	NA	NA	NA	NA	NA	NA	NA	NA	NA	NA	NA	NA	NA	NA	NA	NA	NA	NA	NA	NA	NA	NA	1.50746	6.5961e-05	0.000487434	Up
chr8	145245686	145255444	+	5	152,141,93,79,114	MROH1	hsa_circ_0001833	9758	579	1	Cancer_specific	Exclusively_altered_in_CRC	NA	NA	NA	NA	NA	NA	NA	NA	NA	NA	NA	NA	NA	NA	NA	NA	NA	NA	NA	NA	NA	NA	NA	NA	3.26367	7.85503e-07	1.12254e-05	Up
chr9	130652915	130653322	-	1	407	ST6GALNAC6	hsa_circ_0088708	407	407	1	Cancer_specific	Exclusively_altered_in_CRC	NA	NA	NA	NA	NA	NA	NA	NA	NA	NA	NA	NA	NA	NA	NA	NA	NA	NA	NA	NA	NA	NA	NA	NA	-1.9441	0.00172206	0.00795642	Down
chr7	143573081	143573715	-	1	634	FAM115A	hsa_circ_0002339	634	634	1	Cancer_specific	Exclusively_altered_in_CRC	NA	NA	NA	NA	NA	NA	NA	NA	NA	NA	NA	NA	NA	NA	NA	NA	NA	NA	NA	NA	NA	NA	NA	NA	-1.98683	0.00316048	0.0127352	Down
chr5	127466758	127497492	+	13	140,111,109,128,85,152,108,124,102,156,100,112,141	SLC12A2	hsa_circ_0127822	30734	1568	1	Cancer_specific	Exclusively_altered_in_CRC	NA	NA	NA	NA	NA	NA	NA	NA	NA	NA	NA	NA	NA	NA	NA	NA	NA	NA	NA	NA	NA	NA	NA	NA	2.15484	3.89093e-07	6.37594e-06	Up
chr3	48459319	48459772	-	2	152,173	PLXNB1	hsa_circ_0065378	453	325	1	Cancer_specific	Exclusively_altered_in_CRC	NA	NA	NA	NA	NA	NA	NA	NA	NA	NA	NA	NA	NA	NA	NA	NA	NA	NA	NA	NA	NA	NA	NA	NA	-3.90077	3.3362e-10	1.41386e-08	Down
chr2	85097348	85097909	-	1	561	TRABD2A	hsa_circ_0004420	561	561	1	Cancer_specific	Exclusively_altered_in_CRC	NA	NA	NA	NA	NA	NA	NA	NA	NA	NA	NA	NA	NA	NA	NA	NA	NA	NA	NA	NA	NA	NA	NA	NA	1.90646	5.58179e-05	0.000418294	Up
chr4	25153581	25160729	-	5	103,154,159,119,155	SEPSECS	hsa_circ_0069338	7148	690	1	Cancer_specific	Exclusively_altered_in_CRC	NA	NA	NA	NA	NA	NA	NA	NA	NA	NA	NA	NA	NA	NA	NA	NA	NA	NA	NA	NA	NA	NA	NA	NA	1.47906	0.000231197	0.00145713	Up
chr12	2224389	2229596	+	2	322,106	CACNA1C	hsa_circ_0025016	5207	428	1	Cancer_specific	Exclusively_altered_in_CRC	NA	NA	NA	NA	NA	NA	NA	NA	NA	NA	NA	NA	NA	NA	NA	NA	NA	NA	NA	NA	NA	NA	NA	NA	-2.48979	0.000506304	0.0029077	Down
chr18	48444479	48458730	+	7	104,110,98,114,115,143,103	ME2	hsa_circ_0047700	14251	787	1	Cancer_specific	Exclusively_altered_in_CRC	NA	NA	NA	NA	NA	NA	NA	NA	NA	NA	NA	NA	NA	NA	NA	NA	NA	NA	NA	NA	NA	NA	NA	NA	-1.52491	0.00415266	0.0160491	Down
chr1	203689676	203690538	+	2	192,214	ATP2B4	hsa_circ_0016101	862	406	1	Cancer_specific	Exclusively_altered_in_CRC	NA	NA	NA	NA	NA	NA	NA	NA	NA	NA	NA	NA	NA	NA	NA	NA	NA	NA	NA	NA	NA	NA	NA	NA	-2.09192	0.0064314	0.0227132	Down
chr9	79461430	79469124	-	3	164,203,105	PRUNE2	hsa_circ_0138997	7694	472	1	Cancer_specific	Exclusively_altered_in_CRC	NA	NA	NA	NA	NA	NA	NA	NA	NA	NA	NA	NA	NA	NA	NA	NA	NA	NA	NA	NA	NA	NA	NA	NA	-2.81963	0.000246954	0.00154851	Down
