# Supplementary material for: Characterization of distinct circular RNA signatures in solid tumors
Source: Mol Cancer. 2022 Mar 2;21:63. doi: 10.1186/s12943-022-01546-4 (PMC8889743; doi:10.1186/s12943-022-01546-4)
Supplement: Supplementary file 11 — Additional file 11: Table S15. The differential expression profiles of 215 RBPs that associated with circRNA biogenesis in GBM. [file 12943_2022_1546_MOESM11_ESM.xlsx]

## Sheet: Table S15
Table S15. The differential expression profiles of 215 RBPs that associated with circRNA biogenesis in GBM.
chr	start	end	strand	gene_ID	gene name	log2FoldChange	p value	padj	tumor_avg_FPKM	normal_avg_FPKM	type
chr1	24291294	24307417	-	ENSG00000188529.10	SRSF10	0.281048	0.0292203	0.117107	14.551	10.8259	RNA splicing
chr1	28157289	28178187	+	ENSG00000117751.13	PPP1R8	0.277099	0.00701456	0.037901	11.5372	9.10427	Endonuclease
chr1	29474255	29508499	-	ENSG00000116350.11	SRSF4	0.134282	0.239971	0.547735	16.6171	14.2831	RNA splicing
chr1	32479430	32526451	+	ENSG00000121774.13	KHDRBS1	0.30509	0.00339487	0.0213113	39.2705	28.7691	RNA splicing
chr1	36396319	36538101	+	ENSG00000126070.14	AGO3	0.0385446	0.719194	0.995101	8.35872	7.59998	Endonuclease
chr1	36690017	36770958	+	ENSG00000054118.9	THRAP3	0.172187	0.0310286	0.122614	26.5193	22.1812	RNA splicing
chr1	53692564	53704282	-	ENSG00000162385.6	MAGOH	0.228863	0.0481182	0.17205	6.71983	5.37178	RNA splicing
chr1	89445139	89458643	-	ENSG00000213516.5	RBMXL1	0.0754226	0.407996	0.765966	7.61804	6.91746	RNA splicing
chr1	90460671	90501090	+	ENSG00000162664.12	ZNF326	-0.176042	0.00911865	0.0468074	13.5369	13.2737	RNA splicing
chr1	97187221	97289294	+	ENSG00000117569.14	PTBP2	-0.472699	0.000107656	0.00136045	15.1702	19.1245	RNA splicing
chr1	110881128	110889299	+	ENSG00000162775.10	RBM15	0.36829	0.00339007	0.0212874	8.99409	6.6635	RNA splicing
chr1	112297867	112310638	+	ENSG00000064703.7	DDX20	0.48869	0.000212844	0.00235904	3.6884	2.49807	Helicase
chr1	113215763	113243368	+	ENSG00000155363.14	MOV10	0.736681	0.000146762	0.00174093	10.2935	6.22138	Helicase
chr1	145507598	145513536	+	ENSG00000131795.8	RBM8A	0.395697	0.0475678	0.170626	9.81325	7.14999	RNA splicing
chr1	149895209	149900236	-	ENSG00000143368.9	SF3B4	0.584693	1.57112e-05	0.000305625	4.73828	3.00417	RNA splicing
chr1	151674880	151689290	-	ENSG00000159409.10	CELF3	-1.06745	0.00420503	0.0252523	7.35197	14.0094	RNA splicing
chr1	154554538	154600475	-	ENSG00000160710.11	ADAR	0.163005	0.0712174	0.231695	53.4324	44.9263	Deaminase
chr1	155232659	155248282	-	ENSG00000176444.14	CLK2	0.351317	0.00172004	0.0123722	5.4456	3.91408	RNA splicing
chr1	173446405	173457946	+	ENSG00000117592.8	PRDX6	0.370377	0.108595	0.315968	44.546	32.3916	RNA splicing
chr1	182808504	182856886	+	ENSG00000135829.12	DHX9	0.37435	1.38299e-06	4.65745e-05	41.1668	30.1867	Helicase
chr1	231664399	231702270	+	ENSG00000116918.9	TSNAX	-0.096502	0.247705	0.558552	10.1494	10.0737	Endonuclease
chr1	245014468	245027844	-	ENSG00000153187.12	HNRNPU	0.12664	0.0762787	0.243676	81.8199	71.5619	RNA splicing
chr2	9563697	9613230	+	ENSG00000119203.9	CPSF3	0.492153	0.000690404	0.00599433	10.4734	7.19829	Endonuclease
chr2	15731302	15771235	+	ENSG00000079785.10	DDX1	-0.100145	0.349696	0.698337	25.368	25.2996	Helicase
chr2	38789120	38830728	-	ENSG00000143889.11	HNRNPLL	0.0246228	0.678138	0.995101	15.4368	14.4586	RNA splicing
chr2	38970741	38978636	-	ENSG00000115875.14	SRSF7	-0.0577199	0.499918	0.861577	26.285	25.5825	RNA splicing
chr2	39024871	39103075	-	ENSG00000163214.16	DHX57	0.203163	0.00213118	0.0146757	8.11049	6.67817	Helicase
chr2	70436576	70475792	-	ENSG00000116001.11	TIA1	0.171009	0.159911	0.415085	51.4354	44.5068	RNA splicing
chr2	96940074	96971297	-	ENSG00000144028.10	SNRNP200	0.503428	0.000110472	0.00138687	43.2745	29.3553	Helicase
chr2	118572226	118589955	+	ENSG00000088205.8	DDX18	0.30393	8.55197e-05	0.00113689	18.178	13.711	Helicase
chr2	122494679	122525429	+	ENSG00000211460.7	TSN	0.127838	0.0449816	0.163334	17.3758	15.5461	Endonuclease
chr2	180809603	180871840	-	ENSG00000163510.9	CWC22	0.00063161	0.99242	0.996374	8.81998	8.20049	RNA splicing
chr2	224822121	224832431	+	ENSG00000135900.3	MRPL44	0.197579	0.0143936	0.0671093	6.97787	5.73657	Endonuclease
chr2	232318242	232348352	-	ENSG00000115053.11	NCL	0.131575	0.0793492	0.250975	45.2921	38.5714	RNA splicing
chr3	47844399	47891685	+	ENSG00000132153.10	DHX30	-0.00632099	0.94123	0.995101	23.962	22.8132	Helicase
chr3	50126341	50156454	+	ENSG00000003756.12	RBM5	0.00733883	0.930295	0.995101	45.107	42.1975	RNA splicing
chr3	51428731	51435330	+	ENSG00000179837.6	RBM15B	0.329636	0.027321	0.111143	3.97559	3.01298	RNA splicing
chr3	51991470	52002426	-	ENSG00000090097.16	PCBP4	-0.14066	0.496102	0.857932	34.6105	35.999	RNA splicing
chr3	131100515	131107674	+	ENSG00000198585.7	NUDT16	-0.33079	0.167804	0.42961	7.72897	8.88644	Endonuclease
chr3	137879854	137893791	-	ENSG00000138231.8	DBR1	0.53424	7.31338e-08	4.80684e-06	5.35152	3.66273	Endonuclease
chr3	151961617	152183569	+	ENSG00000152601.13	MBNL1	0.211799	0.0145522	0.0677265	26.209	21.3589	RNA splicing
chr3	153990335	154042286	-	ENSG00000174953.9	DHX36	0.141743	0.0725873	0.23512	19.1051	16.529	Helicase
chr3	180585929	180700541	+	ENSG00000114416.13	FXR1	0.000699792	0.991639	0.99588	33.9581	30.0835	RNA splicing
chr3	185633694	185655924	-	ENSG00000136527.13	TRA2B	0.229367	0.00727137	0.0389626	38.318	30.5667	RNA splicing
chr3	186500994	186507689	+	ENSG00000156976.10	EIF4A2	-0.499581	0.00042608	0.00410659	126.484	174.813	Helicase
chr4	24519064	24586173	-	ENSG00000109606.8	DHX15	0.290403	0.00528998	0.0303949	40.9974	32.3959	Helicase
chr4	69176105	69215807	-	ENSG00000083896.8	YTHDC1	-0.164211	0.0889682	0.272749	7.89308	8.664	RNA splicing
chr4	71681499	71705662	-	ENSG00000132463.9	GRSF1	-0.220054	0.0395199	0.147931	16.487	16.7391	RNA splicing
chr4	113558120	113578748	+	ENSG00000174720.11	LARP7	0.263577	0.00268663	0.0176714	12.1574	9.39588	RNA splicing
chr4	169277886	169458937	-	ENSG00000181381.9	DDX60L	0.880869	0.00120079	0.00931284	6.58216	3.49315	Helicase
chr5	31400604	31532303	-	ENSG00000113360.12	DROSHA	0.272853	0.000412364	0.00399986	18.3098	14.138	Endonuclease
chr5	52083774	52099880	+	ENSG00000152684.10	PELO	0.111151	0.256779	0.572418	3.59194	3.00688	Endonuclease
chr5	54552073	54603550	-	ENSG00000067248.5	DHX29	0.114785	0.0985281	0.294217	7.58664	6.58323	Helicase
chr5	112849380	112930982	+	ENSG00000047188.11	YTHDC2	-0.0213234	0.795452	0.995101	10.7104	10.0564	Helicase
chr5	131891711	131980313	+	ENSG00000113522.9	RAD50	0.0495108	0.579815	0.931961	13.6848	12.5035	Endonuclease
chr5	134094469	134190823	+	ENSG00000145833.11	DDX46	0.0967751	0.190851	0.469095	16.9405	15.0615	Helicase
chr5	150070356	150080669	-	ENSG00000086589.7	RBM22	0.354939	6.18084e-06	0.000148168	17.6497	13.0315	RNA splicing
chr5	151150606	151192346	+	ENSG00000145907.10	G3BP1	0.513506	2.17818e-07	1.15056e-05	23.4321	16.2273	Helicase
chr5	176938578	176944470	-	ENSG00000183258.7	DDX41	0.301782	0.000494329	0.00461123	14.1721	10.8531	Helicase
chr5	179041179	179061785	-	ENSG00000169045.13	HNRNPH1	0.465229	2.85521e-06	8.23104e-05	143.994	100.001	RNA splicing
chr6	4994966	5004297	-	ENSG00000124787.9	RPP40	0.319236	0.00230779	0.0156725	2.64452	2.04924	Endonuclease
chr6	17281577	17294106	+	ENSG00000112183.10	RBM24	-1.46595	0.00199172	0.0139062	0.749358	2.06545	RNA splicing
chr6	30312908	30314661	+	ENSG00000241370.1	RPP21	-0.223448	0.553952	0.910042	0.264169	0.281659	Endonuclease
chr6	30620896	30640814	-	ENSG00000204560.5	DHX16	0.0937927	0.296311	0.628978	0.523803	0.466887	Helicase
chr6	31497996	31510225	-	ENSG00000198563.9	DDX39B	0.234746	0.204219	0.491037	3.03191	2.48571	Helicase
chr6	31783291	31785723	+	ENSG00000204389.8	HSPA1A	-0.338743	0.191857	0.470781	6.34297	7.4355	RNA splicing
chr6	31926857	31937532	+	ENSG00000204351.7	SKIV2L	0.0520184	0.645535	0.979538	0.731061	0.690746	Helicase
chr6	35800743	35889119	-	ENSG00000096063.10	SRPK1	-0.209262	0.0719224	0.233533	9.62239	11.1224	RNA splicing
chr6	36562145	36573377	+	ENSG00000112081.12	SRSF3	0.242904	0.000224926	0.00246179	35.9108	27.5184	RNA splicing
chr6	74104471	74127292	+	ENSG00000080007.6	DDX43	-0.413666	0.467425	0.829315	0.113339	0.153791	Helicase
chr6	89805678	89827800	-	ENSG00000154548.8	SRSF12	-0.245122	0.156656	0.409247	3.30984	3.65623	RNA splicing
chr6	163835032	163999628	+	ENSG00000112531.12	QKI	-0.0213056	0.879863	0.995101	219.336	222.021	RNA splicing
chr6	167342992	167370679	-	ENSG00000026297.11	RNASET2	0.297851	0.17631	0.444185	24.429	18.2645	Endonuclease
chr7	23544399	23571660	-	ENSG00000164548.6	TRA2A	0.183772	0.0192625	0.0844811	36.3451	30.2008	RNA splicing
chr7	26229547	26241149	-	ENSG00000122566.16	HNRNPA2B1	0.394171	5.83636e-06	0.000141486	170.959	125.353	RNA splicing
chr7	44605016	44614650	-	ENSG00000136271.6	DDX56	0.406213	0.000725574	0.00623161	18.428	13.3318	Helicase
chr7	100303676	100305118	+	ENSG00000172336.4	POP7	0.183502	0.0881007	0.270764	8.0926	6.71213	Endonuclease
chr7	104751151	105039755	-	ENSG00000135250.12	SRPK2	-0.44137	8.50885e-05	0.00113349	35.5259	47.0494	RNA splicing
chr7	127292234	127732661	+	ENSG00000197157.6	SND1	0.537997	5.86201e-09	6.72959e-07	32.5965	21.8308	Endonuclease
chr7	150773711	150777953	-	ENSG00000164896.15	FASTK	0.25547	0.00813141	0.0427638	16.1953	12.6532	RNA splicing
chr8	94741584	94753245	-	ENSG00000183808.7	RBM12B	0.269553	0.000493766	0.00460765	15.2459	12.0212	RNA splicing
chr8	95653302	95719694	+	ENSG00000104413.11	ESRP1	-1.75124	0.00115839	0.00905623	0.0258311	0.0774365	RNA splicing
chr8	99129525	99172062	+	ENSG00000104356.6	POP1	0.184431	0.0458865	0.165862	1.75208	1.42537	Endonuclease
chr8	125500726	125551699	-	ENSG00000147687.12	TATDN1	-0.0835586	0.342496	0.690202	11.5828	11.8012	Endonuclease
chr8	136469700	136668965	+	ENSG00000131773.9	KHDRBS3	-0.515866	0.0167431	0.0757134	26.7662	34.1546	RNA splicing
chr8	141541264	141645718	-	ENSG00000123908.7	AGO2	0.113958	0.24275	0.551428	15.5319	14.1087	Endonuclease
chr8	144898514	144912029	-	ENSG00000179950.9	PUF60	0.177955	0.10226	0.302389	25.0792	21.2924	RNA splicing
chr9	4792869	4885917	+	ENSG00000120158.7	RCL1	0.0473342	0.671206	0.995101	7.17122	6.59072	Endonuclease
chr9	33041762	33076665	-	ENSG00000122692.7	SMU1	0.0473928	0.630318	0.968333	9.92417	9.12562	RNA splicing
chr9	86582998	86595569	-	ENSG00000165119.14	HNRNPK	0.363037	4.63198e-06	0.00011899	149.251	106.916	RNA splicing
chr9	99212483	99253618	+	ENSG00000130956.9	HABP4	-0.729277	1.84271e-05	0.000344907	10.5327	16.1495	RNA splicing
chr9	100395908	100436030	+	ENSG00000136937.8	NCBP1	0.252751	0.00525401	0.0302151	11.7877	9.44854	RNA splicing
chr9	114980715	115095947	-	ENSG00000119314.11	PTBP3	0.396778	0.0247868	0.10314	10.1556	7.44957	RNA splicing
chr9	132589569	132598142	-	ENSG00000136819.10	C9orf78	0.125401	0.209308	0.499231	10.4128	9.03433	RNA splicing
chr9	135468384	135545788	-	ENSG00000125485.13	DDX31	0.560307	0.000129269	0.00157454	4.72325	3.13785	Helicase
chr9	136271186	136283164	-	ENSG00000148300.7	REXO4	0.187716	0.0770306	0.245551	2.92458	2.41396	Endonuclease
chr10	1228073	1779670	-	ENSG00000185736.11	ADARB2	-1.66405	2.5307e-05	0.000441228	3.25166	10.1638	Deaminase
chr10	11047259	11378674	+	ENSG00000048740.13	CELF2	-0.4506	0.02968	0.118454	38.9714	47.0189	RNA splicing
chr10	14939358	14996431	-	ENSG00000152457.13	DCLRE1C	0.266596	0.00338459	0.0212647	3.65431	2.96022	Endonuclease
chr10	15139179	15181817	+	ENSG00000152464.10	RPP38	0.223905	0.0156189	0.0716902	4.72985	3.62232	Endonuclease
chr10	43881065	43904614	-	ENSG00000169813.12	HNRNPF	0.614399	2.05e-05	0.000375011	32.0327	20.7699	RNA splicing
chr10	70090931	70102948	+	ENSG00000096746.13	HNRNPH3	-0.0225187	0.806748	0.995101	42.1483	40.0881	RNA splicing
chr10	70661034	70706603	+	ENSG00000107625.8	DDX50	0.0621669	0.49011	0.851864	8.33843	7.52409	Helicase
chr10	70715884	70744829	+	ENSG00000165732.8	DDX21	0.476961	2.8719e-05	0.000485057	10.4819	7.15569	Helicase
chr10	70939988	70968855	+	ENSG00000156502.9	SUPV3L1	-0.158708	0.072485	0.234887	7.33952	7.70339	Helicase
chr10	92631473	92668312	+	ENSG00000148688.9	RPP30	-0.0385918	0.681248	0.995101	7.5357	6.66276	Endonuclease
chr10	112404155	112599227	+	ENSG00000203867.7	RBM20	-0.498461	0.0637879	0.21331	0.36976	0.490243	RNA splicing
chr11	3692313	3819022	-	ENSG00000110713.11	NUP98	0.34636	0.000629934	0.0055838	14.0785	11.1786	RNA splicing
chr11	17095936	17099334	-	ENSG00000110700.2	RPS13	0.452375	0.00695329	0.0376606	118.041	82.1234	RNA splicing
chr11	47487496	47587121	-	ENSG00000149187.13	CELF1	0.0763313	0.401143	0.758503	38.9553	34.8545	RNA splicing
chr11	60658202	60674060	-	ENSG00000110107.4	PRPF19	-0.268818	0.0166066	0.075241	24.9031	28.0194	RNA splicing
chr11	61560109	61564716	+	ENSG00000168496.3	FEN1	0.302184	0.0669759	0.221014	4.50264	3.49086	Endonuclease
chr11	62201016	62323707	-	ENSG00000124942.9	AHNAK	0.419575	0.142085	0.382398	48.8249	29.9245	RNA splicing
chr11	64532078	64546258	-	ENSG00000168066.16	SF1	0.123752	0.110694	0.320504	62.2258	55.7496	RNA splicing
chr11	66384097	66434153	+	ENSG00000173933.15	RBM4	0.333308	0.000154974	0.00182243	39.2577	28.9102	RNA splicing
chr11	68671310	68708070	+	ENSG00000132740.4	IGHMBP2	-0.0968757	0.197135	0.479564	5.19217	4.80039	Helicase
chr11	75110530	75133324	+	ENSG00000149273.10	RPS3	0.451041	0.0189937	0.0835719	115.945	81.6971	Endonuclease
chr11	108535752	108811657	+	ENSG00000178105.5	DDX10	-0.197785	0.0197506	0.0861461	4.9871	5.44017	Helicase
chr11	114270752	114284925	+	ENSG00000076053.6	RBM7	0.394369	3.80377e-06	0.000102282	6.61559	4.75584	RNA splicing
chr11	118620034	118661858	-	ENSG00000110367.7	DDX6	0.0907716	0.204638	0.49168	31.3438	28.4489	Helicase
chr11	122928197	122933938	-	ENSG00000109971.9	HSPA8	0.0391094	0.79466	0.995101	268.028	244.349	RNA splicing
chr12	12966250	12982915	+	ENSG00000213782.3	DDX47	0.278196	0.0177184	0.079174	13.2571	10.4405	Helicase
chr12	46751972	46766650	-	ENSG00000134294.9	SLC38A2	0.0279743	0.828217	0.995101	43.4616	39.2194	RNA splicing
chr12	49223547	49246625	-	ENSG00000174243.5	DDX23	0.416957	5.15489e-05	0.000759776	17.7571	12.7417	Helicase
chr12	54673977	54680872	+	ENSG00000135486.13	HNRNPA1	0.265568	0.050413	0.17816	113.502	90.8737	RNA splicing
chr12	56435637	56438116	+	ENSG00000197728.5	RPS26	0.357558	0.150108	0.397405	43.7907	33.0941	RNA splicing
chr12	56511943	56516278	+	ENSG00000135482.2	ZC3H10	0.489313	0.000578014	0.00520757	5.86191	4.02007	RNA splicing
chr12	113594979	113623284	-	ENSG00000123064.8	DDX54	0.447142	5.07161e-08	3.61379e-06	6.99766	5.02651	Helicase
chr12	120899471	120907596	-	ENSG00000111786.4	SRSF9	0.490353	7.06767e-07	2.77493e-05	39.2989	26.384	RNA splicing
chr12	121016567	121019201	-	ENSG00000167272.6	POP5	0.751815	1.09947e-07	6.62847e-06	14.3465	8.12694	Endonuclease
chr12	124086624	124105488	+	ENSG00000111364.11	DDX55	0.24903	0.013808	0.0650807	7.7141	6.13331	Helicase
chr12	125431371	125473668	-	ENSG00000150990.3	DHX37	0.320077	0.000472223	0.0044484	4.9357	3.78079	Helicase
chr12	132195626	132284282	+	ENSG00000061936.5	SFSWAP	-0.0175205	0.865248	0.995101	14.4261	13.5666	RNA splicing
chr12	132621139	132628880	-	ENSG00000185163.5	DDX51	-0.211801	0.0259684	0.106861	4.7239	5.09991	Helicase
chr13	21714653	21723221	+	ENSG00000150459.8	SAP18	-0.259711	0.0266339	0.109	21.4124	23.6556	RNA splicing
chr13	73329540	73356234	-	ENSG00000083520.10	DIS3	0.172687	0.130228	0.359955	8.13143	6.62478	Endonuclease
chr13	97873688	98046374	+	ENSG00000139793.14	MBNL2	-1.01456	2.24585e-10	5.39631e-08	18.5412	34.7774	RNA splicing
chr14	20923350	20925927	+	ENSG00000100823.7	APEX1	0.412075	0.00172304	0.0123869	30.9249	21.9761	Endonuclease
chr14	23369854	23388393	-	ENSG00000100461.13	RBM23	0.183864	0.0271643	0.110688	21.0123	17.4652	RNA splicing
chr14	24867992	24888494	+	ENSG00000205978.5	NYNRIN	0.0538219	0.768529	0.995101	2.55243	2.36147	Endonuclease
chr14	26912299	27066960	-	ENSG00000139910.15	NOVA1	0.369186	0.112109	0.323393	63.8949	45.0193	RNA splicing
chr14	70193617	70238722	+	ENSG00000100650.11	SRSF5	-0.156778	0.159478	0.414211	72.9208	77.7289	RNA splicing
chr14	73525144	73588122	+	ENSG00000119707.9	RBM25	-0.180215	0.109405	0.317627	22.7837	24.0148	RNA splicing
chr14	78183942	78227550	-	ENSG00000100603.9	SNW1	0.108877	0.220572	0.517473	10.9814	9.58406	RNA splicing
chr14	94517266	94547591	-	ENSG00000089737.11	DDX24	-0.539778	0.000193098	0.00217235	19.3189	27.1149	Helicase
chr14	95552565	95624347	-	ENSG00000100697.10	DICER1	-0.279574	0.0173815	0.0779657	17.8558	20.7818	Endonuclease
chr14	105403581	105444694	-	ENSG00000185567.6	AHNAK2	-0.958884	0.0551487	0.191079	1.8502	3.47701	RNA splicing
chr15	35147732	35262040	-	ENSG00000021776.6	AQR	0.218849	0.00421544	0.0252956	12.8691	10.4169	Helicase
chr15	74890841	74932057	+	ENSG00000179335.14	CLK3	0.145865	0.07994	0.252303	15.2247	12.5813	RNA splicing
chr15	74922899	74988633	-	ENSG00000179151.7	EDC3	0.33462	0.00383331	0.0234604	11.5538	8.86384	Endonuclease
chr15	75246757	75249805	-	ENSG00000178718.5	RPP25	-1.11999	9.93847e-05	0.0012755	0.737741	1.51643	Endonuclease
chr16	2303117	2318413	-	ENSG00000205937.7	RNPS1	-0.0109613	0.908489	0.995101	47.3445	43.8188	RNA splicing
chr16	6069095	7763340	+	ENSG00000078328.15	RBFOX1	-2.40438	6.91774e-06	0.000161414	7.82171	39.2156	RNA splicing
chr16	31191431	31203127	+	ENSG00000089280.14	FUS	0.182891	0.0756291	0.242142	57.8055	47.0367	RNA splicing
chr16	68055179	68057770	-	ENSG00000182810.5	DDX28	0.315197	0.00256041	0.0170236	2.352	1.77351	Helicase
chr16	68263014	68272005	-	ENSG00000103067.7	ESRP2	-0.156226	0.5197	0.881119	0.0796598	0.087861	RNA splicing
chr16	69775770	69788843	-	ENSG00000141101.8	NOB1	0.53005	5.72581e-06	0.000139526	8.83094	5.83963	Endonuclease
chr16	70323566	70369186	+	ENSG00000157349.11	DDX19B	0.445883	1.72861e-05	0.000328671	7.81434	5.54259	Helicase
chr16	70380732	70407286	+	ENSG00000168872.11	DDX19A	0.299885	6.52608e-05	0.000917879	14.0457	10.6748	Helicase
chr16	72127461	72146811	+	ENSG00000140829.7	DHX38	0.275804	0.00172658	0.0124014	13.2321	10.5584	Helicase
chr17	1963133	2207065	-	ENSG00000070366.9	SMG6	0.259933	0.00159132	0.0116706	12.1423	9.79393	Endonuclease
chr17	2308856	2415185	-	ENSG00000127804.8	METTL16	0.316007	0.00952935	0.0484916	9.10457	7.24128	RNA splicing
chr17	5336097	5352150	-	ENSG00000108561.4	C1QBP	0.402557	8.29782e-05	0.00110967	32.3798	23.2218	RNA splicing
chr17	5344232	5372380	-	ENSG00000005100.8	DHX33	0.228656	0.0102988	0.0516074	7.04711	5.8089	Helicase
chr17	7387685	7417933	+	ENSG00000181222.10	POLR2A	0.138354	0.28799	0.61769	30.5188	26.6543	RNA splicing
chr17	7476024	7482323	+	ENSG00000161960.10	EIF4A1	0.659538	3.25714e-06	9.07363e-05	83.9961	52.8821	Helicase
chr17	7494548	7518189	-	ENSG00000129245.7	FXR2	-0.398511	0.000223273	0.00244837	12.7404	15.4937	RNA splicing
chr17	12895708	12921504	-	ENSG00000006744.14	ELAC2	0.239067	0.00388008	0.0236849	14.4726	11.5996	Endonuclease
chr17	28442539	28513493	+	ENSG00000126653.11	NSRP1	0.0151413	0.892625	0.995101	12.4857	11.6235	RNA splicing
chr17	35969787	36003493	-	ENSG00000141141.10	DDX52	0.376854	0.00403101	0.0244043	7.88054	5.8457	Helicase
chr17	37617764	37721160	+	ENSG00000167258.9	CDK12	0.150837	0.0890274	0.272876	18.1047	16.3113	RNA splicing
chr17	41561233	41621831	+	ENSG00000067596.6	DHX8	0.303054	0.00277155	0.0181261	10.9775	8.37909	Helicase
chr17	57642886	57685706	+	ENSG00000108406.5	DHX40	0.645296	1.75427e-05	0.000332449	18.8229	11.5517	Helicase
chr17	61850963	61896677	+	ENSG00000198231.8	DDX42	0.0390051	0.483087	0.845317	31.559	27.8838	Helicase
chr17	62495734	62504317	-	ENSG00000108654.7	DDX5	0.383753	6.20483e-06	0.000148536	95.1705	71.563	Helicase
chr17	74708919	74722866	-	ENSG00000070495.10	JMJD6	-0.0340165	0.744657	0.995101	6.09758	4.98828	RNA splicing
chr17	78109013	78120982	-	ENSG00000141543.5	EIF4A3	0.416722	7.9177e-05	0.00106822	15.3953	11.007	Helicase
chr18	48494361	48514491	+	ENSG00000141642.4	ELAC1	0.453395	2.7253e-05	0.000466437	4.80439	3.23894	Endonuclease
chr19	797075	812327	+	ENSG00000011304.12	PTBP1	0.916735	3.28999e-07	1.56358e-05	29.3948	15.1835	RNA splicing
chr19	1259384	1274879	+	ENSG00000099622.9	CIRBP	0.0147956	0.905671	0.995101	98.0387	93.7061	RNA splicing
chr19	1407568	1435719	+	ENSG00000071626.12	DAZAP1	-0.1296	0.189641	0.466959	20.8811	20.5643	RNA splicing
chr19	14519631	14530192	-	ENSG00000123136.10	DDX39A	0.745908	2.19496e-05	0.000395644	16.301	9.50019	Helicase
chr19	18942747	18979045	+	ENSG00000005007.8	UPF1	0.25705	0.0190124	0.0836399	18.1974	14.6294	Helicase
chr19	19030484	19039436	+	ENSG00000105671.7	DDX49	0.383689	0.00166448	0.0120785	13.0207	9.96004	Helicase
chr19	30094924	30108144	+	ENSG00000105171.5	POP4	0.194419	0.134941	0.368878	7.31551	5.77293	Endonuclease
chr19	36119932	36128588	+	ENSG00000126254.7	RBM42	0.370113	0.00274848	0.0180026	15.5204	11.4178	RNA splicing
chr19	39327028	39342987	-	ENSG00000104824.12	HNRNPL	0.150338	0.0310383	0.122634	54.5626	46.8034	RNA splicing
chr19	45910591	45982086	-	ENSG00000012061.11	ERCC1	0.430198	0.00123082	0.00950008	19.8703	15.6355	Endonuclease
chr19	46436992	46476804	-	ENSG00000104967.6	NOVA2	-0.558442	0.000128669	0.00157103	9.49566	12.8118	RNA splicing
chr19	47852538	47885961	+	ENSG00000134815.14	DHX34	0.178727	0.107571	0.313838	4.3476	3.6551	Helicase
chr19	49588676	49611862	+	ENSG00000104852.10	SNRNP70	-0.127491	0.286223	0.614992	48.7494	50.1159	RNA splicing
chr19	56165512	56186081	+	ENSG00000063244.8	U2AF2	0.278837	0.013706	0.0647289	23.743	18.9699	RNA splicing
chr20	34236847	34252878	-	ENSG00000244462.3	RBM12	0.246296	0.00163487	0.0119055	16.4023	12.8853	RNA splicing
chr20	34291531	34330234	-	ENSG00000131051.16	RBM39	0.18359	0.0178455	0.0796455	89.7222	74.6228	RNA splicing
chr20	42086568	42092245	+	ENSG00000124193.10	SRSF6	0.415398	0.000917637	0.00753299	47.7501	33.5001	RNA splicing
chr20	47835884	47860614	+	ENSG00000124228.10	DDX27	0.100773	0.312538	0.652088	6.07087	5.09383	Helicase
chr20	55966463	55984389	+	ENSG00000132819.12	RBM38	0.883759	1.28259e-05	0.000261788	9.60845	5.10526	RNA splicing
chr20	62189439	62205592	-	ENSG00000130589.12	HELZ2	1.13509	5.27532e-06	0.000131273	5.26884	2.4803	Helicase
chr21	15588451	15600693	+	ENSG00000185272.9	RBM11	-1.78694	0.000166378	0.00192456	0.932383	2.80379	RNA splicing
chr21	34914924	34949812	+	ENSG00000159140.13	SON	0.272231	0.00132018	0.0100398	78.5534	61.3828	RNA splicing
chr21	38738092	38889753	+	ENSG00000157540.15	DYRK1A	-0.118314	0.207474	0.496485	29.2934	29.0211	RNA splicing
chr21	45079429	45115958	+	ENSG00000160208.11	RRP1B	0.39108	0.000113938	0.00142312	7.64921	5.5418	RNA splicing
chr21	46493768	46646478	+	ENSG00000197381.11	ADARB1	-0.440455	0.164516	0.423703	7.20102	8.28088	Deaminase
chr22	36134783	36424473	-	ENSG00000100320.18	RBFOX2	-0.577518	0.00540126	0.0308934	26.3509	36.6533	RNA splicing
chr22	38879445	38903665	-	ENSG00000100201.14	DDX17	0.187674	0.0270944	0.110459	179.806	151.327	Helicase
chrX	41192651	41223725	+	ENSG00000215301.5	DDX3X	0.197583	0.0736475	0.237582	50.8383	42.8563	Helicase
chrX	47004268	47046212	+	ENSG00000182872.11	RBM10	0.257537	0.00824041	0.0432007	4.88611	3.8459	RNA splicing
chrX	48432837	48437454	+	ENSG00000102317.13	RBM3	0.412385	0.00453882	0.0268432	15.104	11.1485	RNA splicing
chrX	48755195	48760420	+	ENSG00000102103.11	PQBP1	0.204792	0.246596	0.557049	7.90376	6.35363	RNA splicing
chrX	64732462	64754655	-	ENSG00000001497.12	LAS1L	-0.0371681	0.698627	0.995101	11.3883	10.9298	Endonuclease
chrX	100663283	100669121	+	ENSG00000126945.8	HNRNPH2	-0.102151	0.300661	0.635273	11.9771	12.0638	RNA splicing
chrX	131503345	131623996	-	ENSG00000076770.10	MBNL3	0.648712	0.0172113	0.077343	3.0283	1.84775	RNA splicing
chrX	135930163	135962923	-	ENSG00000147274.10	RBMX	0.515292	8.25038e-07	3.12933e-05	55.7808	38.0617	RNA splicing
chrX	146993469	147032645	+	ENSG00000102081.9	FMR1	-0.344809	0.00563423	0.0319508	8.49247	9.55785	RNA splicing
chrY	15016019	15032390	+	ENSG00000067048.12	DDX3Y	0.0468513	0.972073	0.995101	9.10516	8.35054	Helicase
