# Supplementary material for: Characterization of distinct circular RNA signatures in solid tumors
Source: Mol Cancer. 2022 Mar 2;21:63. doi: 10.1186/s12943-022-01546-4 (PMC8889743; doi:10.1186/s12943-022-01546-4)
Supplement: Supplementary file 12 — Additional file 12: Table S16. The differentially expressed protein-coding genes identified in circLIFR-overexpressing KYSE30 cells. [file 12943_2022_1546_MOESM12_ESM.xlsx]

## Sheet: Table S16
Table S16. The differentially expressed protein-coding genes identified in circLIFR-overexpressing KYSE30 cells.
gene name	log2FoldChange_OE_vs_control	p value	padj	significance	OE_avg_FPKM	control_avg_FPKM	FPKM_foldchange_OE_vs_control	chr	start	end	strand	gene_ID	vector-1_FPKM	vector-2_FPKM	vector-3_FPKM	circLIFR-1_FPKM	circLIFR-2_FPKM	circLIFR-3_FPKM
CTPS1	-1.61924	0	0	Down	25.5963	83.5658	0.306301	chr1	41445007	41478235	+	ENSG00000171793.9	86.4188	80.9116	83.367	26.1347	25.8009	24.8534
CYR61	-1.53828	0	0	Down	26.2408	81.6291	0.321464	chr1	86046444	86049645	+	ENSG00000142871.11	80.9397	81.5258	82.4218	25.144	28.0885	25.4899
GBP2	2.89935	0	0	Up	11.6285	1.53995	7.55122	chr1	89571815	89616139	-	ENSG00000162645.8	1.70187	1.38115	1.53684	10.6395	12.3952	11.8508
VTCN1	3.18117	0	0	Up	47.0649	5.6177	8.37796	chr1	117686209	117753556	-	ENSG00000134258.12	5.37413	5.55772	5.92126	47.5078	48.4678	45.2192
TXNIP	3.2653	0	0	Up	101.593	11.4218	8.89466	chr1	145438469	145442635	+	ENSG00000117289.7	11.8188	11.1718	11.2749	105.155	105.657	93.9684
GLUL	2.30703	0	0	Up	86.393	19.52	4.42588	chr1	182350839	182361341	-	ENSG00000135821.12	20.1853	18.3716	20.0029	90.9668	85.9488	82.2634
KDM5B	1.89917	0	0	Up	25.5286	7.54315	3.38435	chr1	202696526	202778598	-	ENSG00000117139.12	6.83519	7.44148	8.35278	24.3916	25.4506	26.7437
BTG2	2.50817	0	0	Up	37.7389	7.27595	5.1868	chr1	203274619	203278730	+	ENSG00000159388.5	7.04677	7.3063	7.47478	38.3635	37.5093	37.344
IRF6	1.36157	0	0	Up	55.6226	23.9848	2.31907	chr1	209959036	209979465	-	ENSG00000117595.6	23.0818	24.2339	24.6389	55.8989	57.1204	53.8487
ODC1	-1.62577	0	0	Down	18.2786	62.0788	0.294442	chr2	10580094	10588630	-	ENSG00000115758.8	61.7979	65.6703	58.7681	19.0588	19.2038	16.5732
FAM84A	1.75249	0	0	Up	20.4197	5.97522	3.41739	chr2	14772810	14790933	+	ENSG00000162981.12	5.50749	6.0757	6.34246	20.6283	19.984	20.6467
YPEL5	1.80895	0	0	Up	44.311	13.4683	3.29003	chr2	30369807	30383399	+	ENSG00000119801.8	13.3691	13.0269	14.0088	45.1078	44.6538	43.1714
CYBRD1	1.9948	0	0	Up	18.5631	5.03296	3.68832	chr2	172378757	172414643	+	ENSG00000071967.7	4.8864	5.00315	5.20932	19.3914	18.8354	17.4626
SESTD1	1.412	0	0	Up	16.678	6.71204	2.48479	chr2	179966419	180129517	-	ENSG00000187231.9	6.78507	6.76966	6.5814	16.7809	16.871	16.3822
MAP2	1.46834	0	0	Up	27.5067	11.8484	2.32156	chr2	210288782	210598842	+	ENSG00000078018.15	12.11	10.9656	12.4696	25.8195	25.6267	31.0739
FN1	1.55677	0	0	Up	162.555	58.7868	2.76517	chr2	216225163	216300895	-	ENSG00000115414.14	58.0107	59.9055	58.4443	160.579	166.25	160.838
ALCAM	2.06099	0	0	Up	22.5459	5.73891	3.9286	chr3	105085753	105295744	+	ENSG00000170017.8	5.86972	5.7297	5.61732	22.5323	22.9495	22.1558
TNFSF10	3.93912	0	0	Up	15.7699	1.09053	14.4607	chr3	172223298	172241297	-	ENSG00000121858.6	1.17961	0.96663	1.12535	16.2333	15.5073	15.5689
KLHL24	2.07637	0	0	Up	26.8446	6.23836	4.30316	chr3	183353356	183402265	+	ENSG00000114796.11	4.9543	6.28084	7.47994	26.1856	26.6364	27.7119
TP63	2.04602	0	0	Up	15.783	4.1151	3.83538	chr3	189349205	189615068	+	ENSG00000073282.8	3.97261	4.02722	4.34547	16.5686	15.8289	14.9514
MUC20	2.73434	0	0	Up	18.0541	2.95359	6.1126	chr3	195447753	195467994	+	ENSG00000176945.12	2.68073	2.94999	3.23004	16.5061	18.118	19.5382
LIMCH1	1.74233	0	0	Up	22.2867	6.93057	3.21571	chr4	41361624	41702061	+	ENSG00000064042.13	7.08387	6.59801	7.10982	21.9963	22.3568	22.507
CCNG2	2.14396	0	0	Up	21.9548	5.37082	4.08779	chr4	78078304	78354542	+	ENSG00000138764.9	5.07784	5.27578	5.75886	24.3448	21.097	20.4226
SPP1	2.78189	0	0	Up	30.753	5.18951	5.92599	chr4	88896819	88904562	+	ENSG00000118785.9	5.06124	4.25834	6.24894	32.0099	30.6906	29.5584
RHOBTB3	1.30512	0	0	Up	77.6521	33.4366	2.32237	chr5	95049226	95160087	+	ENSG00000164292.8	34.1399	32.7544	33.4153	79.6623	77.1333	76.1607
CAST	1.73841	0	0	Up	193.784	54.4266	3.56047	chr5	95860971	96115299	+	ENSG00000153113.19	52.7204	59.9229	50.6365	165.653	188.534	227.167
ERAP2	1.67863	0	0	Up	25.3181	8.55324	2.96007	chr5	96211643	96255420	+	ENSG00000164308.12	8.44454	8.35079	8.86438	25.1729	25.6483	25.1332
GABRP	3.66219	0	0	Up	33.8074	2.75668	12.2638	chr5	170190354	170241051	+	ENSG00000094755.12	2.81975	2.51408	2.93621	33.5469	36.2137	31.6616
HNRNPAB	-1.34238	0	0	Down	46.1516	125.23	0.368536	chr5	177631508	177638164	+	ENSG00000197451.6	128.08	125.706	121.903	47.0058	47.5672	43.8818
RNF144B	1.7234	0	0	Up	31.525	10.2627	3.07181	chr6	18368779	18469105	+	ENSG00000137393.8	10.2645	9.93169	10.5918	31.857	31.3373	31.3807
AGR2	2.71959	0	0	Up	244.324	42.5388	5.74356	chr7	16831435	16873057	-	ENSG00000106541.7	39.4674	42.4823	45.6666	243.417	255.681	233.875
IGFBP3	1.83309	0	0	Up	954.721	291.698	3.27298	chr7	45951949	45961473	-	ENSG00000146674.10	286.896	294.788	293.409	976.547	1001.59	886.026
PEG10	1.18921	0	0	Up	401.173	190.3	2.10811	chr7	94285637	94299007	+	ENSG00000242265.1	189.45	187.215	194.234	404.765	404.29	394.464
CLU	1.8099	0	0	Up	116.095	35.9171	3.23231	chr8	27454434	27472548	-	ENSG00000120885.15	32.5715	37.7586	37.4212	113.261	117.081	117.944
GSN	1.51574	0	0	Up	112.995	42.7113	2.64556	chr9	123970072	124095121	+	ENSG00000148180.12	41.018	43.8143	43.3014	116.539	114.47	107.976
CLIC3	3.26957	0	0	Up	34.5312	3.93851	8.76759	chr9	139889087	139891255	-	ENSG00000169583.12	3.50577	4.33894	3.97083	33.8991	35.2462	34.4483
NOLC1	-1.29217	0	0	Down	23.1676	60.664	0.381901	chr10	103911933	103923627	+	ENSG00000166197.12	60.9018	60.0031	61.0871	23.4311	24.1959	21.8758
COL17A1	1.73862	0	0	Up	90.0176	29.3443	3.06763	chr10	105791044	105845760	-	ENSG00000065618.12	28.5239	29.7758	29.7334	91.7746	90.7795	87.4988
PDGFD	2.28473	0	0	Up	14.0585	3.14654	4.46793	chr11	103777914	104035107	-	ENSG00000170962.8	2.94236	3.26562	3.23163	14.6781	13.8243	13.6732
NOP2	-1.52126	0	0	Down	15.3281	47.0453	0.325816	chr12	6666029	6677857	-	ENSG00000111641.6	48.4684	46.4051	46.2624	15.7925	15.3525	14.8392
METTL7A	2.72168	0	0	Up	12.9068	2.10757	6.12402	chr12	51317255	51326300	+	ENSG00000185432.10	1.93508	2.07647	2.31116	13.3666	12.6216	12.7321
CALCOCO1	2.48778	0	0	Up	17.6058	3.44647	5.10837	chr12	54104903	54121529	-	ENSG00000012822.11	3.36605	3.3579	3.61546	17.8771	17.6786	17.2618
TCP11L2	2.70454	0	0	Up	15.2942	2.60265	5.87637	chr12	106695707	106740793	+	ENSG00000166046.6	2.30842	2.58634	2.91321	15.9997	15.6157	14.2671
FREM2	2.56869	0	0	Up	13.8889	2.51332	5.52613	chr13	39261266	39460074	+	ENSG00000150893.9	2.35929	2.49179	2.68887	13.6124	13.7522	14.3021
SLITRK6	2.19221	0	0	Up	39.1095	9.24398	4.23081	chr13	86366925	86373623	-	ENSG00000184564.8	9.17155	9.36529	9.19508	40.3594	39.7439	37.2252
AHNAK2	1.94879	0	0	Up	23.1148	6.40684	3.60784	chr14	105403581	105444694	-	ENSG00000185567.6	6.03633	6.48337	6.70083	22.3334	23.0823	23.9288
HAS3	-2.66999	0	0	Down	3.07434	21.3348	0.1441	chr16	69139467	69152622	+	ENSG00000103044.6	22.1718	21.0534	20.7792	3.34591	2.85388	3.02324
KRT13	2.67288	0	0	Up	203.262	34.4468	5.90075	chr17	39657233	39661957	-	ENSG00000171401.10	31.8235	35.3153	36.2017	207.552	203.338	198.897
CAPS	2.20168	0	0	Up	57.5168	14.6757	3.91919	chr19	5911718	5915888	+	ENSG00000105519.8	13.1677	16.1098	14.7496	57.5298	58.3274	56.6931
FXYD3	2.14675	0	0	Up	118.446	28.0632	4.22069	chr19	35606732	35615228	+	ENSG00000089356.12	27.6494	28.2072	28.3329	125.479	119.691	110.168
AXL	-2.24715	0	0	Down	12.0168	59.6413	0.201485	chr19	41725108	41767671	+	ENSG00000167601.7	58.7139	59.5444	60.6655	11.9449	12.0259	12.0795
FLRT3	1.51403	0	0	Up	43.8299	15.6729	2.79654	chr20	14303634	14318262	-	ENSG00000125848.9	15.9997	15.2602	15.7589	44.5181	45.0355	41.9363
ID1	2.12298	0	0	Up	104.748	25.9186	4.04142	chr20	30193086	30194318	+	ENSG00000125968.7	24.6576	26.103	26.9953	105.358	101.651	107.235
PIK3IP1	4.3203	0	0	Up	13.5064	0.729383	18.5176	chr22	31677579	31688520	-	ENSG00000100100.8	0.709251	0.697182	0.781715	13.5721	14.4525	12.4947
SAT1	2.2216	0	0	Up	85.8462	19.6588	4.36682	chrX	23801290	23804343	+	ENSG00000130066.12	20.6159	18.9307	19.4296	87.8092	90.3033	79.426
LIPH	1.59361	5.15016e-306	5.55482e-304	Up	26.6598	10.5468	2.52776	chr3	185224050	185270401	-	ENSG00000163898.5	10.7176	10.8359	10.0869	27.5774	26.8647	25.5373
HBP1	1.7284	5.32385e-306	5.64141e-304	Up	25.0184	7.97323	3.1378	chr7	106809406	106842974	+	ENSG00000105856.9	7.71222	7.81351	8.39395	25.6545	25.4863	23.9144
CRISP3	3.31742	6.24905e-306	6.50763e-304	Up	10.448	1.13986	9.16605	chr6	49695097	49712150	-	ENSG00000096006.7	1.04475	1.27309	1.10174	10.4885	11.1	9.75548
SEMA3D	1.70909	1.07333e-304	1.0988e-302	Up	18.4674	5.94838	3.10461	chr7	84624869	84816171	-	ENSG00000153993.9	6.01175	5.65895	6.17444	18.3525	18.42	18.6296
DSC3	1.39679	3.71864e-302	3.74343e-300	Up	15.8672	6.51388	2.43591	chr18	28569974	28622781	-	ENSG00000134762.12	6.53952	6.37261	6.62951	16.0177	16.3745	15.2094
MFSD6	1.3359	4.50941e-302	4.46506e-300	Up	38.8997	16.5409	2.35173	chr2	191273081	191373931	+	ENSG00000151690.10	16.6382	16.1321	16.8524	39.39	39.0996	38.2096
SRM	-1.81727	1.39224e-300	1.35632e-298	Down	13.3342	53.2289	0.250506	chr1	11114641	11120081	-	ENSG00000116649.5	55.4319	52.0606	52.1941	13.2712	13.8326	12.8987
PLD1	1.66988	1.89968e-300	1.82128e-298	Up	19.4022	6.64872	2.91819	chr3	171318195	171528740	-	ENSG00000075651.11	6.64821	6.67009	6.62786	19.2768	18.9097	20.0202
PARP14	1.55347	2.38946e-300	2.25505e-298	Up	12.1078	4.39874	2.75257	chr3	122399465	122449687	+	ENSG00000173193.9	4.28686	4.45923	4.45014	12.3588	12.0202	11.9445
TOMM40	-1.41351	1.06433e-298	9.8901e-297	Down	33.2842	95.4515	0.348702	chr19	45393826	45406946	+	ENSG00000130204.8	91.2574	98.9048	96.1923	34.6618	33.1952	31.9955
GPC4	1.61888	1.55208e-298	1.42039e-296	Up	14.8994	5.39626	2.76107	chrX	132434131	132549518	-	ENSG00000076716.7	5.16334	5.47952	5.54592	14.971	14.8387	14.8887
NEBL	1.55784	5.44027e-294	4.90436e-292	Up	19.4812	7.34868	2.65098	chr10	21068902	21463116	-	ENSG00000078114.14	7.57868	6.83072	7.63663	19.6721	20.4544	18.3171
PTPN3	1.15006	9.47676e-292	8.41759e-290	Up	40.5803	20.2811	2.00089	chr9	112137746	112260590	-	ENSG00000070159.9	24.9133	17.8966	18.0334	46.2227	38.3395	37.1786
MVP	2.03612	4.18274e-291	3.66141e-289	Up	16.8727	4.56474	3.69631	chr16	29831715	29859355	+	ENSG00000013364.14	4.33652	4.57826	4.77943	16.8253	16.8796	16.9132
SNCG	2.26971	1.14317e-290	9.86393e-289	Up	45.4655	10.1314	4.48757	chr10	88718375	88723017	+	ENSG00000173267.9	9.58634	10.7052	10.1028	44.868	46.1933	45.3353
POF1B	1.81737	3.53872e-288	3.01041e-286	Up	16.3199	4.98521	3.27367	chrX	84532402	84634748	-	ENSG00000124429.13	5.11603	4.88107	4.95853	16.1237	17.4082	15.4278
MXD4	2.36927	4.71129e-288	3.95225e-286	Up	11.7472	2.37945	4.93692	chr4	2249159	2264021	-	ENSG00000123933.10	1.91609	2.5894	2.63288	11.1911	12.2406	11.8099
IKZF2	1.34966	2.15904e-287	1.78638e-285	Up	21.8797	9.29021	2.35514	chr2	213864429	214017151	-	ENSG00000030419.12	9.06232	9.67322	9.13509	21.2123	21.892	22.5348
HSPA8	-1.31271	1.1887e-282	9.70235e-281	Down	290.231	784.925	0.369757	chr11	122928197	122933938	-	ENSG00000109971.9	870.221	721.161	763.392	315.242	290.137	265.314
NOP56	-1.34439	1.76956e-282	1.42508e-280	Down	81.0239	199.414	0.40631	chr20	2632791	2639039	+	ENSG00000101361.10	195.871	209.714	192.658	85.7808	74.434	82.8569
KIAA1217	1.49958	1.53186e-278	1.21742e-276	Up	17.3948	6.41091	2.71331	chr10	23983675	24836772	+	ENSG00000120549.11	6.00308	6.75445	6.4752	18.086	17.3157	16.7826
EHF	2.24165	2.43168e-278	1.90745e-276	Up	11.1319	2.60132	4.27931	chr11	34642640	34682604	+	ENSG00000135373.8	2.43952	2.7731	2.59134	11.4057	11.0506	10.9394
MYH14	1.53693	3.29025e-277	2.54784e-275	Up	20.4626	7.64543	2.67645	chr19	50691443	50813802	+	ENSG00000105357.11	7.22686	7.8483	7.86114	20.682	20.4958	20.2101
SEMA3F	2.07271	4.47531e-275	3.42163e-273	Up	13.0984	3.39161	3.86202	chr3	50192478	50226508	+	ENSG00000001617.7	3.17272	3.39246	3.60964	13.0805	12.7573	13.4576
CTDSP2	1.41695	8.72823e-274	6.58981e-272	Up	56.231	22.7282	2.47406	chr12	58213710	58240522	-	ENSG00000175215.5	21.3057	23.0314	23.8475	57.682	55.6712	55.3397
BZW1	-1.30458	2.97909e-270	2.22145e-268	Down	35.4719	94.1769	0.376652	chr2	201675317	201688569	+	ENSG00000082153.13	98.4747	92.23	91.8259	35.5249	37.7192	33.1717
SEPP1	3.25465	7.08992e-267	5.22233e-265	Up	12.0356	1.33169	9.03787	chr5	42799982	42887494	-	ENSG00000250722.1	1.06916	1.30736	1.61855	12.5988	10.4207	13.0874
GRAMD1C	2.07196	3.08947e-264	2.24824e-262	Up	12.5304	3.28056	3.81959	chr3	113547029	113666021	+	ENSG00000178075.15	2.83945	3.63989	3.36234	12.6155	12.9844	11.9913
EPB41L4A	1.66384	7.71265e-264	5.54577e-262	Up	18.2083	5.76874	3.15638	chr5	111478138	111755013	-	ENSG00000129595.8	5.60233	5.58053	6.12338	18.9579	17.6398	18.0273
EBNA1BP2	-1.40616	1.45667e-262	1.03509e-260	Down	42.3395	118.118	0.35845	chr1	43629846	43736607	-	ENSG00000117395.6	117.269	121.782	115.303	43.8468	44.3452	38.8264
GPR110	0.988822	1.35902e-261	9.54474e-260	None	88.8702	49.1117	1.80955	chr6	46965440	47010099	-	ENSG00000153292.11	49.4721	49.0851	48.778	88.1156	90.992	87.5029
EIF5A	-0.954001	3.47189e-261	2.41037e-259	None	181.13	392.068	0.461986	chr17	7210318	7215774	+	ENSG00000132507.13	398.037	391.022	387.145	187.211	188.441	167.738
CYP4F12	2.54411	1.58113e-260	1.08523e-258	Up	15.9886	2.88088	5.54989	chr19	15783567	15807984	+	ENSG00000186204.10	2.66131	2.84966	3.13168	16.41	15.3685	16.1873
GABARAPL1	1.257	1.83146e-258	1.24292e-256	Up	54.1369	26.7339	2.02503	chr12	10365057	10375727	+	ENSG00000139112.6	24.3282	28.3113	27.5621	57.0604	55.7618	49.5884
TSPAN1	1.47955	2.46849e-257	1.65663e-255	Up	67.0516	26.6416	2.5168	chr1	46640745	46651630	+	ENSG00000117472.5	25.1138	27.6935	27.1174	69.2013	67.2287	64.7246
COL12A1	1.30643	9.69866e-257	6.43735e-255	Up	19.8868	8.41366	2.36363	chr6	75794042	75915767	-	ENSG00000111799.16	7.97544	8.09866	9.16689	20.2174	19.5388	19.9041
LAMB2	1.76528	1.4247e-255	9.35349e-254	Up	21.3321	7.52041	2.83656	chr3	49158547	49170551	-	ENSG00000172037.9	7.04182	7.37077	8.14865	21.2057	21.4652	21.3254
NETO2	-1.50548	1.5887e-254	1.0318e-252	Down	18.2171	57.5342	0.31663	chr16	47111614	47177908	-	ENSG00000171208.5	60.2541	59.0573	53.2913	18.0473	18.6813	17.9227
MEIS1	1.68613	2.12556e-250	1.36579e-248	Up	20.2668	6.72303	3.01453	chr2	66660584	66801001	+	ENSG00000143995.15	6.66399	6.85295	6.65214	19.8445	19.8125	21.1433
FGFR3	2.6491	7.85282e-250	4.99274e-248	Up	11.5282	1.85713	6.20752	chr4	1795034	1810599	+	ENSG00000068078.13	1.43522	1.99949	2.13668	11.8451	11.7687	10.9707
TMEM173	1.7598	1.70054e-248	1.06992e-246	Up	40.3769	13.4396	3.00431	chr5	138855119	138862520	-	ENSG00000184584.8	12.3687	13.7013	14.2489	41.1346	40.6292	39.3668
CTNND2	1.92263	7.64099e-247	4.75789e-245	Up	11.2496	3.28427	3.42529	chr5	10971952	11904155	-	ENSG00000169862.14	3.09524	3.36556	3.39201	10.8842	10.8966	11.9678
IGFBP5	1.24833	1.26962e-246	7.82498e-245	Up	34.344	15.6671	2.1921	chr2	217536828	217560248	-	ENSG00000115461.4	15.075	15.5502	16.3762	34.3716	34.5855	34.0749
DST	1.09342	3.35374e-246	2.04612e-244	Up	151.038	70.4829	2.14291	chr6	56322785	56819426	-	ENSG00000151914.13	74.3906	68.5211	68.537	144.974	142.587	165.554
TCOF1	-1.25301	2.19729e-245	1.32717e-243	Down	17.8317	45.4054	0.392722	chr5	149737202	149779871	+	ENSG00000070814.13	44.1954	46.3868	45.6339	18.4809	18.3037	16.7105
PPIF	-1.22948	8.56952e-244	5.12474e-242	Down	22.1313	56.571	0.391212	chr10	81107225	81115093	+	ENSG00000108179.9	56.8647	55.9181	56.9302	22.2756	22.5696	21.5486
ERMP1	1.01864	9.87046e-242	5.84486e-240	Up	57.6164	29.08	1.9813	chr9	5765076	5833117	-	ENSG00000099219.9	28.1696	30.1774	28.893	60.7863	60.0985	51.9644
TACSTD2	0.995238	4.24044e-239	2.48662e-237	None	225.418	122.137	1.84562	chr1	59041099	59043166	-	ENSG00000184292.5	120.103	121.282	125.024	230.884	231.053	214.318
KRT15	1.71826	4.64645e-239	2.69852e-237	Up	21.3624	7.44349	2.86995	chr17	39669995	39678781	-	ENSG00000171346.9	7.71503	7.22091	7.39454	20.6316	23.7802	19.6755
PCMTD1	1.26289	7.57202e-237	4.35572e-235	Up	46.2763	21.4977	2.15262	chr8	52730140	52811735	-	ENSG00000168300.9	24.3206	19.5184	20.654	51.1641	44.7917	42.8731
UTP20	-1.23914	1.22193e-236	6.96269e-235	Down	7.6983	19.5675	0.393422	chr12	101673887	101780394	+	ENSG00000120800.4	20.1749	19.1152	19.4125	7.88907	7.78345	7.42238
TUBA1B	-1.07855	7.25883e-235	4.09751e-233	Down	384.884	876.473	0.439128	chr12	49521565	49525180	-	ENSG00000123416.11	865.71	887.299	876.412	397.137	402.668	354.847
C3orf58	1.75176	7.40255e-233	4.13994e-231	Up	15.4662	4.9229	3.14167	chr3	143690640	143767561	+	ENSG00000181744.4	5.31658	4.53198	4.92014	15.5409	15.1326	15.725
MMP14	1.73362	7.74536e-232	4.29192e-230	Up	12.294	3.97275	3.09459	chr14	23305766	23318236	+	ENSG00000157227.8	3.7421	4.06109	4.11508	12.6992	12.3041	11.8788
UGT1A6	1.86774	1.32317e-231	7.26543e-230	Up	29.7672	8.60302	3.46009	chr2	234600253	234681946	+	ENSG00000167165.14	8.76546	7.7481	9.2955	29.227	30.8962	29.1785
FAM3C	1.09961	1.29279e-229	7.03463e-228	Up	71.1239	35.705	1.99199	chr7	120988905	121036418	-	ENSG00000196937.6	36.4651	34.5221	36.1276	72.7442	71.1702	69.4573
ERBB3	1.0221	2.67365e-229	1.44186e-227	Up	47.4255	25.2859	1.87558	chr12	56473641	56497289	+	ENSG00000065361.10	24.1849	25.2705	26.4022	46.3506	49.4909	46.4351
FKBP4	-1.04912	5.15971e-229	2.75793e-227	Down	62.0567	132.535	0.468229	chr12	2904119	2914576	+	ENSG00000004478.5	135.405	131.312	130.887	62.1078	63.9911	60.0711
CCT5	-1.12356	2.2751e-228	1.2054e-226	Down	49.9692	119.562	0.417937	chr5	10250033	10266524	+	ENSG00000150753.7	121.025	122.5	115.16	51.3183	52.5226	46.0667
LAMB3	1.25402	1.75761e-227	9.23127e-226	Up	28.5487	13.4101	2.1289	chr1	209788215	209825811	-	ENSG00000196878.8	13.2155	14.0408	12.9739	27.8723	29.2722	28.5016
CLDN1	1.08753	6.98155e-224	3.63522e-222	Up	86.4919	43.3337	1.99595	chr3	190023490	190040264	-	ENSG00000163347.5	44.364	41.7067	43.9305	87.1662	87.709	84.6005
RBL2	1.05782	7.57442e-224	3.91021e-222	Up	37.7866	19.3975	1.94801	chr16	53467889	53525561	+	ENSG00000103479.10	19.6015	19.1568	19.4342	38.1052	38.2148	37.0399
OLFML2A	1.37764	9.24138e-224	4.73033e-222	Up	20.4664	8.48996	2.41066	chr9	127539437	127577164	+	ENSG00000185585.15	7.95132	8.55245	8.96611	20.7634	20.5246	20.1112
MBOAT1	1.65062	1.80766e-223	9.175e-222	Up	24.0276	8.42982	2.85031	chr6	20100935	20212670	-	ENSG00000172197.9	8.27083	8.47291	8.54571	25.6585	23.0715	23.3529
TRIM38	1.32359	2.0286e-223	1.02106e-221	Up	15.3937	6.64184	2.31769	chr6	25963030	25987384	+	ENSG00000112343.8	6.55824	6.69088	6.6764	15.4669	15.2627	15.4515
LGALS3	1.43233	6.30715e-223	3.14836e-221	Up	66.1039	27.1343	2.43617	chr14	55590828	55612126	+	ENSG00000131981.11	25.5619	28.8097	27.0314	69.1317	68.1073	61.0726
AEN	-1.76759	6.9789e-223	3.45513e-221	Down	4.29932	14.8076	0.290347	chr15	89164527	89175513	+	ENSG00000181026.13	15.4792	12.875	16.0684	4.28978	4.53294	4.07524
CCT6A	-0.920742	1.48941e-222	7.31385e-221	None	325.293	671.156	0.484675	chr7	56119323	56131682	+	ENSG00000146731.6	667.902	677.774	667.793	330.296	336.927	308.655
CCDC86	-1.67359	7.73936e-222	3.76982e-220	Down	8.80795	30.3185	0.290514	chr11	60609544	60618554	+	ENSG00000110104.7	29.9319	30.5238	30.4998	9.21139	9.22845	7.98402
FAM214A	1.78123	2.57359e-221	1.24356e-219	Up	15.8375	4.55154	3.4796	chr15	52873514	53002014	-	ENSG00000047346.8	4.69346	4.47632	4.48486	15.7874	15.5578	16.1674
SORT1	1.31729	2.11148e-220	1.01217e-218	Up	11.8457	5.21363	2.27207	chr1	109852192	109940573	-	ENSG00000134243.7	5.20762	5.06349	5.36979	11.8345	12.1952	11.5075
FNDC3B	1.09654	2.0158e-219	9.58696e-218	Up	82.8698	37.7525	2.19508	chr3	171757418	172119455	+	ENSG00000075420.8	39.23	33.6506	40.3767	80.3397	81.6962	86.5736
STIP1	-1.05713	9.81089e-218	4.62951e-216	Down	49.6492	108.906	0.45589	chr11	63952744	63972015	+	ENSG00000168439.12	109.434	111.728	105.556	50.2469	51.5625	47.1383
ALDH3B1	1.74584	3.7349e-217	1.74874e-215	Up	24.2262	8.09954	2.99105	chr11	67776048	67796744	+	ENSG00000006534.11	7.89521	8.53042	7.87299	26.1827	23.9816	22.5142
DDX21	-1.53041	1.44376e-214	6.70791e-213	Down	21.0084	65.521	0.320637	chr10	70715884	70744829	+	ENSG00000165732.8	70.4367	62.513	63.6132	22.4818	21.4645	19.079
PA2G4	-1.18852	3.78674e-214	1.74595e-212	Down	42.1617	103.082	0.40901	chr12	56498103	56507691	+	ENSG00000170515.9	104.729	104.037	100.481	43.4838	44.0968	38.9045
MICAL2	-1.75332	5.76013e-214	2.6357e-212	Down	3.42722	11.5181	0.297552	chr11	12115543	12285334	+	ENSG00000133816.9	12.167	10.7029	11.6843	3.31539	3.43945	3.5268
TSPAN15	1.35123	4.91771e-213	2.23331e-211	Up	44.0111	18.4088	2.39077	chr10	71211229	71267425	+	ENSG00000099282.5	17.4624	18.957	18.8069	44.5083	44.8294	42.6956
SCNN1A	1.54834	4.91584e-212	2.2158e-210	Up	59.848	21.0962	2.8369	chr12	6456009	6486896	-	ENSG00000111319.8	19.3966	21.1771	22.7149	62.2898	55.5863	61.6678
DHRS3	1.24931	1.0743e-211	4.8065e-210	Up	114.176	51.8191	2.20337	chr1	12627939	12677737	-	ENSG00000162496.4	49.172	52.6979	53.5874	115.393	112.671	114.465
ADD3	1.32515	7.83584e-209	3.48003e-207	Up	25.4545	11.32	2.24864	chr10	111756126	111895323	+	ENSG00000148700.9	10.8699	11.5793	11.5107	26.2368	26.2356	23.8912
LRRC59	-1.07571	9.38917e-209	4.13946e-207	Down	45.3736	104.087	0.43592	chr17	48452420	48474914	-	ENSG00000108829.9	107.818	101.751	102.692	46.6488	45.6155	43.8563
PNRC1	1.92808	1.31526e-208	5.75663e-207	Up	21.1545	6.30699	3.35414	chr6	89790470	89794879	+	ENSG00000146278.10	5.78845	6.65343	6.47908	20.352	21.3949	21.7167
NDRG1	1.285	1.36584e-208	5.93503e-207	Up	40.4714	17.8399	2.26859	chr8	134249414	134314265	-	ENSG00000104419.10	16.9746	18.3143	18.2307	39.7255	42.3608	39.3279
CCT2	-1.14892	3.59733e-208	1.55199e-206	Down	44.9064	106.815	0.420413	chr12	69979114	69995350	+	ENSG00000166226.8	107.592	107.551	105.301	46.7336	46.4086	41.577
SEMA3C	1.7114	1.06439e-207	4.55951e-206	Up	10.6365	3.47712	3.059	chr7	80371854	80551675	-	ENSG00000075223.9	3.44815	3.38657	3.59663	11.4714	10.43	10.0081
FOSL1	-3.48104	1.08337e-207	4.60814e-206	Down	0.937242	12.2867	0.0762813	chr11	65659520	65668044	-	ENSG00000175592.4	12.6652	12.2857	11.9091	1.10722	0.764419	0.940089
SLC29A1	-1.66028	1.05556e-205	4.45847e-204	Down	7.70374	27.3367	0.281809	chr6	44187242	44201888	+	ENSG00000112759.12	26.4861	27.3362	28.1878	7.87322	7.78736	7.45063
CNTNAP3	1.97362	1.41175e-205	5.92151e-204	Up	13.8445	3.95978	3.49629	chr9	39072764	39288312	-	ENSG00000106714.13	3.56908	4.22128	4.08897	14.2981	12.8539	14.3816
EFNB2	1.33122	6.04311e-205	2.51727e-203	Up	18.1825	7.80401	2.3299	chr13	107142079	107187462	-	ENSG00000125266.6	7.38405	8.05158	7.97639	18.517	18.4289	17.6017
TUBA1C	-1.0502	1.11203e-201	4.60046e-200	Down	196.175	443.401	0.442432	chr12	49582519	49667114	+	ENSG00000167553.10	441.67	451.456	437.079	204.379	201.38	182.765
C1RL	1.77557	2.96911e-201	1.21996e-199	Up	16.905	6.50495	2.5988	chr12	7242183	7261869	-	ENSG00000139178.6	6.03654	6.59715	6.88116	15.9012	18.3379	16.476
ID2	2.93288	6.7756e-201	2.76518e-199	Up	10.2401	1.51666	6.75175	chr2	8818975	8824583	+	ENSG00000115738.5	1.28265	1.57944	1.6879	9.21102	11.0079	10.5015
NRP1	-1.47236	2.91618e-200	1.18213e-198	Down	3.96133	12.4035	0.319371	chr10	33466420	33625190	-	ENSG00000099250.13	11.6886	13.4398	12.0821	4.52112	3.67847	3.6844
FAM171B	1.14309	3.54859e-200	1.4289e-198	Up	17.5214	8.56917	2.0447	chr2	187558698	187630685	+	ENSG00000144369.8	8.61055	8.3694	8.72756	17.8119	17.9854	16.7669
ZNF704	0.985187	2.18949e-199	8.75797e-198	None	17.7159	10.0098	1.76986	chr8	81540686	81787016	-	ENSG00000164684.9	9.7916	9.76971	10.4681	18.3216	17.4259	17.4004
IGSF3	0.991404	2.45427e-199	9.75247e-198	None	21.5892	11.7618	1.83553	chr1	117117031	117210375	-	ENSG00000143061.13	11.733	11.6909	11.8614	22.1326	22.0571	20.5778
TSR1	-1.1611	4.30916e-199	1.70113e-197	Down	9.90229	23.3382	0.424295	chr17	2225797	2240801	-	ENSG00000167721.6	23.6433	23.4781	22.8932	10.0408	9.95031	9.71574
HID1	1.66035	1.9414e-198	7.61433e-197	Up	23.4415	8.4331	2.77971	chr17	72946838	72969261	-	ENSG00000167861.11	7.97908	8.22748	9.09273	23.3379	22.1249	24.8618
CD82	2.28522	2.77226e-198	1.08029e-196	Up	13.4664	2.87464	4.68456	chr11	44585977	44641913	+	ENSG00000085117.7	2.77474	2.54711	3.30206	13.1438	13.5395	13.7159
TMEM59	1.02331	9.38417e-198	3.63336e-196	Up	108.561	58.1271	1.86765	chr1	54497347	54519177	-	ENSG00000116209.7	62.5351	54.3579	57.4885	110.291	111.988	103.404
ADCY6	1.30117	3.89155e-197	1.49713e-195	Up	14.1237	6.17661	2.28664	chr12	49159975	49182820	-	ENSG00000174233.7	6.2461	5.86508	6.41865	14.1525	13.5184	14.7002
RAB11FIP1	0.94357	5.41252e-197	2.06909e-195	None	33.0576	18.4868	1.78817	chr8	37716136	37756985	-	ENSG00000156675.11	18.2577	18.6417	18.5611	33.7594	34.0397	31.3736
GRN	1.20837	7.32864e-197	2.78396e-195	Up	105.995	49.874	2.12526	chr17	42422614	42430470	+	ENSG00000030582.12	46.6112	51.7578	51.2531	109.064	104.288	104.634
CASP4	1.72094	1.25217e-196	4.72694e-195	Up	21.1735	5.94584	3.56106	chr11	104813593	104840163	-	ENSG00000196954.8	6.62668	5.09038	6.12045	20.7736	22.3724	20.3743
HSPH1	-1.21101	1.53005e-196	5.74006e-195	Down	26.8399	66.6744	0.402552	chr13	31710762	31736525	-	ENSG00000120694.15	69.9266	64.862	65.2347	26.7051	28.2759	25.5388
TNFSF18	1.45818	1.55655e-196	5.80342e-195	Up	30.2415	11.879	2.54579	chr1	173009100	173020103	-	ENSG00000120337.7	11.7178	12.0245	11.8947	31.5079	31.5582	27.6583
PBXIP1	1.8453	3.5325e-195	1.30897e-193	Up	11.5778	3.5321	3.27788	chr1	154916552	154928599	-	ENSG00000163346.12	3.21805	3.88233	3.49592	11.7891	11.9101	11.0342
WDR43	-1.24174	4.55363e-195	1.67707e-193	Down	17.2995	42.4614	0.407418	chr2	29117509	29171088	+	ENSG00000163811.7	44.6672	41.7293	40.9878	17.4432	17.9344	16.521
ANXA9	1.67161	1.13118e-193	4.1408e-192	Up	22.1012	7.48768	2.95167	chr1	150954493	150968110	+	ENSG00000143412.5	7.0521	7.51043	7.90051	22.455	22.1639	21.6847
GRB7	1.57821	1.75983e-193	6.40323e-192	Up	33.8782	10.7927	3.13899	chr17	37894180	37903544	+	ENSG00000141738.9	9.95117	11.4235	11.0034	32.3769	36.4531	32.8046
SDCCAG3	-1.34932	2.14635e-193	7.76285e-192	Down	22.1356	61.0166	0.362779	chr9	139296377	139305061	-	ENSG00000165689.12	62.5084	59.7959	60.7456	22.2229	21.2658	22.918
ORAI3	2.05742	2.93871e-192	1.05654e-190	Up	12.6868	3.27949	3.86852	chr16	30960387	30967782	+	ENSG00000175938.6	2.9951	3.32984	3.51354	12.4351	12.9449	12.6804
SSH3	1.59371	2.16974e-189	7.75457e-188	Up	17.3569	6.132	2.83055	chr11	67070919	67080078	+	ENSG00000172830.8	5.77092	6.52133	6.10374	17.6111	17.4229	17.0367
SAMD9	1.05645	3.24664e-189	1.15351e-187	Up	26.7241	13.9188	1.92	chr7	92728829	92747336	-	ENSG00000205413.3	14.1938	14.0038	13.5588	27.1341	27.889	25.1493
APOBEC3C	1.11785	3.50008e-189	1.23629e-187	Up	30.8435	15.4794	1.99255	chr22	39410088	39416357	+	ENSG00000244509.3	15.5075	15.1836	15.7471	31.3279	31.5782	29.6244
ZNF385A	1.77121	5.798e-189	2.03604e-187	Up	19.7413	6.09471	3.23909	chr12	54762917	54785082	-	ENSG00000161642.13	5.38533	5.45587	7.44294	19.6816	21.5255	18.0168
NOL6	-1.39274	7.76939e-188	2.71255e-186	Down	7.60837	17.7601	0.428397	chr9	33461439	33473928	-	ENSG00000165271.12	17.4028	17.9702	17.9074	9.77003	6.25942	6.79566
PDCD11	-0.984903	1.04993e-187	3.64458e-186	None	12.954	28.2368	0.458763	chr10	105156405	105206049	+	ENSG00000148843.9	28.2584	28.1948	28.2573	12.9279	13.3201	12.614
ACLY	-0.968857	1.44617e-187	4.99134e-186	None	20.0233	41.9923	0.476833	chr17	40023161	40086795	-	ENSG00000131473.12	41.3475	42.1732	42.4562	20.4547	20.2614	19.3538
EFEMP1	0.90057	1.29839e-186	4.45583e-185	None	107.419	65.2055	1.64739	chr2	56093102	56151274	-	ENSG00000115380.14	68.2063	59.0831	68.327	105.993	106.034	110.23
CENPV	-1.6868	4.46175e-185	1.52254e-183	Down	8.73068	31.3928	0.278111	chr17	16245848	16256970	-	ENSG00000166582.5	31.6704	31.2967	31.2114	9.3958	8.07008	8.72615
SOX4	1.28302	3.55445e-183	1.20612e-181	Up	13.5077	5.99636	2.25264	chr6	21593972	21598847	+	ENSG00000124766.4	5.95214	5.91982	6.11712	13.725	13.3623	13.4357
PADI3	1.01675	3.59497e-183	1.21305e-181	Up	172.681	92.2072	1.87274	chr1	17575593	17610728	+	ENSG00000142619.4	87.6293	92.8735	96.1189	172.189	177.688	168.165
FBLN1	1.97922	4.63696e-182	1.55596e-180	Up	11.489	3.2166	3.57178	chr22	45898118	45997015	+	ENSG00000077942.13	3.1244	3.12222	3.40317	11.6567	11.2072	11.6031
SERINC5	1.49794	6.22246e-182	2.07645e-180	Up	28.1401	10.8085	2.60353	chr5	79407050	79551898	-	ENSG00000164300.11	10.5762	11.1281	10.7211	27.4041	29.5421	27.4741
KRT19	0.95344	6.39298e-182	2.12163e-180	None	1004.5	557.235	1.80265	chr17	39679869	39684560	-	ENSG00000171345.9	528.779	569.155	573.769	1026.03	1020.54	966.923
SPRY1	1.90333	9.47113e-182	3.12599e-180	Up	17.1917	4.87301	3.52794	chr4	124317950	124324910	+	ENSG00000164056.6	4.60883	4.70947	5.30075	16.1587	17.8741	17.5424
AHNAK	0.878458	2.62473e-181	8.61597e-180	None	132.595	73.9222	1.79371	chr11	62201016	62323707	-	ENSG00000124942.9	73.2687	73.8416	74.6562	120.996	153.128	123.661
RRM2	-0.882285	4.13652e-181	1.35052e-179	None	47.9392	93.0797	0.515034	chr2	10262455	10271545	+	ENSG00000171848.9	94.9976	92.1973	92.0443	48.284	48.9571	46.5766
B4GALT5	0.987355	1.20322e-179	3.90723e-178	None	37.5246	20.4464	1.83526	chr20	48249482	48330415	-	ENSG00000158470.5	20.1611	20.048	21.1303	37.9175	38.0602	36.5962
APOL6	1.04535	2.0319e-179	6.56294e-178	Up	10.434	5.46116	1.91059	chr22	36044442	36064456	+	ENSG00000221963.5	5.32721	5.55469	5.50157	10.5427	10.6709	10.0885
HSPD1	-1.02925	1.50623e-178	4.83916e-177	Down	238.025	535.889	0.444169	chr2	198351305	198381461	-	ENSG00000144381.12	547.919	539.048	520.7	239.631	256.851	217.593
PPRC1	-1.23281	1.81296e-178	5.79379e-177	Down	9.31382	23.9632	0.388671	chr10	103892787	103910082	+	ENSG00000148840.6	22.7069	24.0042	25.1785	9.60385	9.056	9.2816
PVRL4	1.77348	2.39087e-178	7.60046e-177	Up	10.0991	3.18134	3.17448	chr1	161040785	161059389	-	ENSG00000143217.7	3.01297	3.25481	3.27624	10.7143	10.5073	9.0757
RALGDS	1.39014	5.38741e-177	1.70366e-175	Up	16.5241	7.03164	2.34996	chr9	135973107	136039301	-	ENSG00000160271.10	6.63982	7.10941	7.34569	16.6451	16.5217	16.4055
ITGB6	1.05599	5.80862e-177	1.82729e-175	Up	41.8586	23.9361	1.74877	chr2	160956177	161128399	-	ENSG00000115221.6	24.6253	21.5482	25.6348	41.2464	42.5202	41.8093
RRP12	-1.20516	8.6569e-177	2.7092e-175	Down	9.52034	23.5468	0.404316	chr10	99116115	99161127	-	ENSG00000052749.9	23.0758	23.1552	24.4093	9.59442	9.42995	9.53665
VPS13C	1.02761	7.73411e-176	2.40794e-174	Up	24.6202	11.9698	2.05686	chr15	62144588	62352672	-	ENSG00000129003.11	11.7083	11.7778	12.4231	23.8764	24.8551	25.129
ANKRD65	1.99418	4.24822e-174	1.31586e-172	Up	17.3219	4.64437	3.72965	chr1	1353800	1357149	-	ENSG00000235098.4	4.44693	4.56703	4.91915	16.9304	17.5042	17.531
PDGFC	1.39725	7.68119e-174	2.36706e-172	Up	29.5567	12.5208	2.3606	chr4	157681606	157892546	-	ENSG00000145431.6	13.0334	10.6336	13.8955	30.1873	29.3415	29.1413
CCT7	-1.00359	8.82094e-174	2.70449e-172	Down	102.745	222.206	0.462387	chr2	73460548	73480149	+	ENSG00000135624.11	222.268	227.392	216.957	106.268	107.235	94.732
PVR	-1.00002	2.47253e-173	7.54247e-172	Down	19.8402	41.1576	0.482054	chr19	45147098	45166850	+	ENSG00000073008.10	40.7402	41.1182	41.6143	20.7331	19.4341	19.3533
CTSD	1.31743	3.6929e-173	1.12086e-171	Up	105.783	45.9974	2.29976	chr11	1773982	1785222	-	ENSG00000117984.8	42.3491	47.2159	48.4271	105.097	105.825	106.426
CDH1	0.862109	1.81753e-172	5.48893e-171	None	68.8659	40.9099	1.68336	chr16	68771128	68869451	+	ENSG00000039068.14	40.3468	41.8236	40.5593	68.9194	69.8076	67.8707
PAICS	-1.12882	1.75095e-171	5.26158e-170	Down	40.7591	92.1305	0.442406	chr4	57301907	57327534	+	ENSG00000128050.4	92.5654	99.1917	84.6345	39.0039	45.9308	37.3427
C1orf21	1.21583	2.24942e-171	6.72599e-170	Up	10.6194	4.81598	2.20504	chr1	184356192	184598154	+	ENSG00000116667.8	5.16809	4.49952	4.78033	10.9254	10.38	10.5529
LAMA5	1.32078	7.8424e-171	2.3334e-169	Up	73.5519	33.7026	2.18238	chr20	60883011	60942368	-	ENSG00000130702.9	31.9044	33.4422	35.7613	73.2442	70.9489	76.4625
NCOA2	1.04381	1.42006e-170	4.20449e-169	Up	27.6478	14.2608	1.93873	chr8	71021997	71316040	-	ENSG00000140396.8	13.6025	14.3234	14.8564	26.3341	27.4731	29.1361
PSAP	0.911572	4.27851e-170	1.26059e-168	None	203.437	117.102	1.73726	chr10	73576055	73611126	-	ENSG00000197746.9	111.947	120.696	118.663	204.862	206.409	199.041
PRELID1	-0.882382	1.22789e-169	3.60023e-168	None	100.634	207.393	0.485234	chr5	176730775	176733960	+	ENSG00000169230.5	213.391	216.882	191.906	99.1416	105.211	97.5502
STAT2	1.18333	1.26751e-169	3.69843e-168	Up	30.8609	14.7096	2.09802	chr12	56735381	56753939	-	ENSG00000170581.9	14.0551	15.0318	15.0417	30.968	31.4698	30.145
NCL	-1.06625	1.34185e-168	3.89652e-167	Down	82.6522	189.69	0.435723	chr2	232318242	232348352	-	ENSG00000115053.11	195.083	188.449	185.537	87.1523	85.9909	74.8135
TGFBR1	0.960298	1.80699e-168	5.22212e-167	None	69.4133	36.9116	1.88053	chr9	101866320	101916474	+	ENSG00000106799.8	37.4062	34.845	38.4836	78.5241	66.4411	63.2748
SCARA3	1.56088	8.46868e-168	2.43575e-166	Up	21.8969	7.9837	2.7427	chr8	27491385	27534293	+	ENSG00000168077.9	7.41548	8.29683	8.23878	21.6695	22.8846	21.1364
HSPA9	-0.896862	8.71733e-167	2.49539e-165	None	64.148	131.152	0.489112	chr5	137890571	137911133	-	ENSG00000113013.8	137.103	131.812	124.541	65.6764	66.1406	60.627
PRMT1	-0.89351	1.04934e-166	2.98964e-165	None	95.7233	185.744	0.515351	chr19	50179043	50192286	+	ENSG00000126457.16	188.899	186.144	182.19	99.8805	95.6604	91.6291
KLF5	1.18058	1.41394e-166	4.00948e-165	Up	27.8423	13.0939	2.12636	chr13	73629114	73651676	+	ENSG00000102554.9	12.3085	13.3634	13.6097	28.133	27.8334	27.5604
EREG	-1.465	1.44e-165	4.06431e-164	Down	6.11542	17.5125	0.349202	chr4	75230860	75254468	+	ENSG00000124882.3	18.6972	16.3147	17.5257	6.35818	6.09826	5.88982
ASS1	2.28436	2.08925e-165	5.86935e-164	Up	10.8274	2.38393	4.54184	chr9	133320316	133376661	+	ENSG00000130707.13	2.33461	2.54383	2.27336	11.2482	10.9502	10.2839
BTN3A1	1.70872	2.9721e-165	8.31087e-164	Up	12.6867	4.27841	2.96529	chr6	26402465	26415444	+	ENSG00000026950.12	4.01514	4.70469	4.1154	13.5824	12.0913	12.3864
RNF103	1.25624	3.19868e-163	8.90324e-162	Up	16.1642	7.2617	2.22595	chr2	86830516	86850989	-	ENSG00000239305.2	7.30736	7.32538	7.15235	15.6996	16.9659	15.827
TJP3	1.84855	7.56208e-163	2.09518e-161	Up	16.5561	4.65506	3.55658	chr19	3708107	3750811	+	ENSG00000105289.10	4.14743	4.55269	5.26506	17.0895	16.3415	16.2372
FGF12	1.52037	1.75542e-162	4.84143e-161	Up	12.9129	5.29538	2.43852	chr3	191857184	192485553	-	ENSG00000114279.9	5.70432	4.98482	5.19701	12.7068	12.6973	13.3346
URB2	-1.36695	2.32061e-162	6.37112e-161	Down	4.76963	13.0329	0.365968	chr1	229761981	229795946	+	ENSG00000135763.5	13.1319	12.6831	13.2837	5.17972	4.37837	4.75079
GOLGB1	1.04216	3.8923e-162	1.06378e-160	Up	13.1175	6.69211	1.96014	chr3	121382046	121468602	-	ENSG00000173230.11	6.76211	6.57281	6.74141	12.6204	13.5667	13.1654
ZBED6	1.00438	4.42484e-162	1.20388e-160	Up	25.537	13.7556	1.85648	chr1	203765437	203769686	+	ENSG00000257315.1	13.6415	14.1148	13.5106	26.2561	25.731	24.6239
ITGB8	1.09787	2.68771e-161	7.27971e-160	Up	15.1946	6.93394	2.19134	chr7	20370325	20455377	+	ENSG00000105855.5	6.91076	6.92917	6.96189	15.6012	14.5087	15.474
ANK3	1.19376	9.0747e-161	2.44693e-159	Up	12.6748	5.48444	2.31105	chr10	61786056	62493248	-	ENSG00000151150.16	5.667	5.04715	5.73917	11.7231	12.971	13.3303
KIAA1324L	1.32581	1.28034e-160	3.437e-159	Up	10.9904	4.56339	2.40838	chr7	86506222	86689015	-	ENSG00000164659.10	4.86128	3.95713	4.87176	10.4323	10.1001	12.4387
SYNE2	1.04737	3.8861e-160	1.03858e-158	Up	20.5303	10.6296	1.93144	chr14	64319683	64693165	+	ENSG00000054654.11	10.8621	10.4835	10.543	19.946	20.4946	21.1503
TMEM106B	1.08253	1.12856e-159	3.00288e-158	Up	15.8597	8.88175	1.78565	chr7	12250867	12282993	+	ENSG00000106460.14	11.5081	8.13347	7.00364	14.8213	17.2786	15.4792
TRIP13	-1.2111	1.23834e-159	3.28051e-158	Down	12.4616	31.0311	0.401584	chr5	892758	919472	+	ENSG00000071539.9	31.523	31.1354	30.4349	12.7046	13.3016	11.3786
WDR77	-1.29479	1.36045e-159	3.58826e-158	Down	13.8949	39.8972	0.348268	chr1	111982512	111991998	-	ENSG00000116455.9	38.3704	42.1797	39.1413	14.0025	14.8847	12.7976
COTL1	-0.772623	1.09181e-158	2.86719e-157	None	123.624	228.838	0.540224	chr16	84599200	84651683	-	ENSG00000103187.6	224.979	234.068	227.467	125.842	127.168	117.861
PTPRU	1.3954	1.98193e-158	5.18218e-157	Up	11.8735	4.90317	2.42161	chr1	29563028	29653325	+	ENSG00000060656.15	4.61528	5.07991	5.01432	11.585	11.9661	12.0696
DNAJA1	-1.06707	2.92417e-157	7.61294e-156	Down	21.8203	48.0723	0.453906	chr9	33025209	33039905	+	ENSG00000086061.11	48.4094	48.8674	46.9402	22.7965	21.9645	20.6999
TFDP2	1.20047	1.09229e-156	2.83152e-155	Up	18.4037	10.4468	1.76166	chr3	141663277	141868386	-	ENSG00000114126.13	10.8518	10.4416	10.047	16.7212	20.8915	17.5983
SERPINE2	-1.51236	1.47655e-156	3.81126e-155	Down	7.16558	24.1696	0.296471	chr2	224839829	224904036	-	ENSG00000135919.8	28.8943	20.645	22.9696	7.82997	7.09826	6.56851
GEMIN5	-1.05352	1.52719e-156	3.9252e-155	Down	9.66741	21.6458	0.446618	chr5	154266976	154317769	-	ENSG00000082516.8	22.3878	21.4205	21.1291	9.80637	9.7595	9.43636
LMO7	0.939847	1.04094e-155	2.6641e-154	None	58.6431	31.7841	1.84505	chr13	76194570	76434004	+	ENSG00000136153.15	31.665	32.2543	31.433	56.8592	60.9758	58.0943
EPB41L1	1.20843	1.74053e-155	4.43579e-154	Up	35.4073	15.3528	2.30625	chr20	34679426	34820721	+	ENSG00000088367.16	13.6577	17.3608	15.0399	34.9791	34.762	36.481
ABCE1	-1.10604	2.89469e-155	7.34618e-154	Down	18.4685	43.008	0.429419	chr4	146019084	146050331	+	ENSG00000164163.6	44.8603	41.9967	42.1671	18.6163	18.9787	17.8103
STRA6	1.29891	6.17202e-155	1.55979e-153	Up	48.599	21.6715	2.24253	chr15	74471807	74504608	-	ENSG00000137868.14	20.2517	21.9189	22.8439	48.7139	47.8248	49.2582
IDH2	1.51184	6.28496e-155	1.58171e-153	Up	17.0542	6.54361	2.60624	chr15	90626277	90645736	-	ENSG00000182054.5	5.96489	6.93162	6.73432	16.9041	17.6567	16.6019
SPTLC2	1.02181	1.52708e-154	3.8272e-153	Up	21.798	11.6668	1.86837	chr14	77972340	78083116	-	ENSG00000100596.2	11.4056	11.3632	12.2317	22.5065	21.9309	20.9566
PSMD1	-0.831154	6.68702e-154	1.66899e-152	None	37.5373	74.4802	0.50399	chr2	231921578	232037541	+	ENSG00000173692.8	73.3555	71.5437	78.5414	37.6853	38.426	36.5004
EIF3B	-0.819754	9.55015e-154	2.37378e-152	None	49.3855	94.2167	0.524169	chr7	2393721	2420380	+	ENSG00000106263.13	89.9079	96.206	96.5363	50.6731	52.6276	44.8558
WDTC1	1.3942	2.77728e-153	6.8749e-152	Up	11.3304	4.8014	2.35981	chr1	27561007	27635110	+	ENSG00000142784.11	4.65139	4.91846	4.83434	11.3215	11.1016	11.5679
LAMB1	0.789594	1.10267e-152	2.71843e-151	None	80.1907	51.1121	1.56892	chr7	107564244	107643700	-	ENSG00000091136.9	49.9929	50.8404	52.5029	79.3522	81.2045	80.0155
TFRC	-0.989105	1.25723e-152	3.08686e-151	None	48.7234	101.005	0.482389	chr3	195754054	195809060	-	ENSG00000072274.8	104.69	97.8412	100.483	51.4168	48.6858	46.0677
MYC	-1.3576	1.38106e-152	3.37717e-151	Down	11.4407	32.3319	0.353851	chr8	128747680	128753674	+	ENSG00000136997.10	30.3706	33.9961	32.629	11.9593	11.3358	11.027
MYBBP1A	-1.00266	3.28915e-152	8.01068e-151	Down	17.3324	38.011	0.455984	chr17	4442192	4458926	-	ENSG00000132382.10	37.9046	37.4071	38.7211	18.1195	16.8844	16.9933
SEH1L	-1.08452	7.62363e-152	1.84927e-150	Down	20.8533	46.5657	0.447826	chr18	12947132	12987535	+	ENSG00000085415.11	46.1806	45.6768	47.8398	20.2755	22.7534	19.531
PCMTD2	1.17257	9.13068e-152	2.20597e-150	Up	31.8243	15.1388	2.10216	chr20	62887094	62926855	+	ENSG00000203880.7	13.9721	15.8243	15.6201	32.5205	31.3896	31.5628
ZNF362	1.62766	1.33602e-150	3.21496e-149	Up	17.7887	5.97806	2.97567	chr1	33722146	33766320	+	ENSG00000160094.10	5.64443	5.6855	6.60424	16.5447	18.2125	18.6089
NFKBIZ	1.55636	2.74618e-150	6.58212e-149	Up	11.9105	4.43708	2.6843	chr3	101546835	101579866	+	ENSG00000144802.7	4.53349	4.45238	4.32538	11.2748	12.1827	12.2738
DUSP10	1.37086	2.97327e-150	7.09825e-149	Up	16.182	6.62042	2.44426	chr1	221874766	221915518	-	ENSG00000143507.13	6.42067	6.78441	6.65618	15.8778	16.6977	15.9705
GEMIN4	-1.07582	4.41015e-150	1.04871e-148	Down	11.2697	25.8963	0.435185	chr17	647654	657239	-	ENSG00000179409.6	25.1568	26.3984	26.1338	11.3936	11.2064	11.2091
CAPG	1.14349	6.55559e-150	1.55277e-148	Up	86.3038	41.874	2.06103	chr2	85621871	85645555	-	ENSG00000042493.11	39.1519	42.7148	43.7553	91.695	87.9341	79.2823
LGALS1	1.27283	1.45884e-148	3.44194e-147	Up	137.34	61.7852	2.22286	chr22	38071615	38075813	+	ENSG00000100097.7	58.3766	65.3198	61.6593	134.206	145.349	132.466
PLAG1	1.30455	1.91063e-148	4.49036e-147	Up	11.405	5.20324	2.1919	chr8	57073463	57123883	-	ENSG00000181690.3	5.09422	5.31118	5.2043	11.0578	10.9485	12.2086
PER3	1.18803	2.2556e-148	5.28055e-147	Up	10.6842	4.9474	2.15956	chr1	7844380	7905237	+	ENSG00000049246.10	4.95891	4.76978	5.11351	11.2315	10.5483	10.2728
PROM2	1.40623	1.19723e-147	2.792e-146	Up	21.2648	8.95371	2.37497	chr2	95940201	95957056	+	ENSG00000155066.11	8.51539	8.61261	9.73312	21.1206	19.8194	22.8545
POLR1B	-1.15766	1.22092e-147	2.83629e-146	Down	8.96099	22.0352	0.406667	chr2	113299492	113334635	+	ENSG00000125630.11	22.8878	21.3728	21.8449	8.8462	9.07923	8.95754
YPEL3	2.76421	1.78918e-147	4.14047e-146	Up	12.929	1.88573	6.85622	chr16	30103635	30108236	-	ENSG00000090238.7	2.06325	1.96252	1.63142	12.767	12.4439	13.5761
ERV3-1	1.77977	3.10537e-147	7.15895e-146	Up	10.7148	3.6314	2.9506	chr7	64451187	64467121	-	ENSG00000213462.4	3.42803	3.89313	3.57303	10.6941	11.0004	10.4498
ELF3	1.07977	6.42763e-146	1.47615e-144	Up	110.906	55.5484	1.99657	chr1	201977073	201986316	+	ENSG00000163435.11	48.3006	59.1411	59.2034	116.378	108.301	108.041
PSME3	-0.921989	7.24995e-146	1.6587e-144	None	66.8893	115.611	0.578573	chr17	40976402	40995774	+	ENSG00000131467.6	120.271	96.7811	129.781	70.0738	65.4271	65.1672
BOP1	-1.61633	1.11414e-144	2.53939e-143	Down	7.03355	23.4099	0.300452	chr8	145486055	145515082	-	ENSG00000170727.7	23.1471	22.3963	24.6864	7.74809	6.60624	6.74632
GRWD1	-1.05283	1.38879e-144	3.15348e-143	Down	7.91541	18.3606	0.431109	chr19	48949030	48960279	+	ENSG00000105447.8	18.9485	17.4047	18.7284	7.7245	8.33997	7.68176
KHNYN	1.03499	2.48157e-144	5.61373e-143	Up	22.0566	12.1355	1.81753	chr14	24898492	24910540	+	ENSG00000100441.5	11.6609	12.0765	12.6692	21.3539	23.396	21.4199
ATXN1	1.06684	2.95847e-144	6.6676e-143	Up	14.4486	7.14831	2.02126	chr6	16299343	16761722	-	ENSG00000124788.13	7.15864	7.08111	7.20518	14.5074	13.9509	14.8876
PDLIM1	0.78408	3.21299e-144	7.21429e-143	None	226.05	142.457	1.58679	chr10	96997329	97050781	-	ENSG00000107438.4	138.962	145.969	142.439	226.941	231.55	219.657
TOM1L2	1.08303	1.98975e-143	4.45114e-142	Up	107.506	54.6295	1.96792	chr17	17746828	17875736	-	ENSG00000175662.13	50.7716	56.1635	56.9534	107.904	105.165	109.45
MAN1B1	0.811472	4.13185e-143	9.209e-142	None	73.9851	44.7248	1.65423	chr9	139981379	140003635	+	ENSG00000177239.10	43.8779	45.2046	45.0918	73.3684	75.9701	72.6167
BAZ2B	1.06147	4.54701e-143	1.0097e-141	Up	20.6382	11.5492	1.78698	chr2	160175490	160473203	-	ENSG00000123636.13	10.8585	11.4027	12.3863	20.6293	19.9799	21.3053
TAB3	0.932098	5.12967e-143	1.13492e-141	None	23.3601	13.4258	1.73995	chrX	30845559	30993201	-	ENSG00000157625.11	13.4293	13.4077	13.4404	23.7553	23.3795	22.9455
AGRN	1.04986	5.76647e-143	1.27115e-141	Up	61.8639	33.2512	1.8605	chr1	955503	991496	+	ENSG00000188157.9	31.9387	33.1453	34.6697	61.4053	60.7841	63.4023
NOC2L	-0.99471	4.5974e-142	1.00976e-140	None	24.1995	51.4875	0.470008	chr1	879584	894689	-	ENSG00000188976.6	49.1585	53.2634	52.0406	24.4287	24.1299	24.04
NEDD9	0.952193	4.90272e-142	1.07291e-140	None	23.1615	12.8881	1.79712	chr6	11183531	11382581	-	ENSG00000111859.12	12.69	12.8287	13.1455	23.3152	23.4567	22.7125
ELAC2	-0.793751	1.24253e-140	2.70934e-139	None	51.6896	95.1441	0.543277	chr17	12895708	12921504	-	ENSG00000006744.14	92.2726	95.9994	97.1605	53.3059	52.1475	49.6155
ARFGEF1	0.89935	3.28041e-140	7.12723e-139	None	38.7701	22.2988	1.73866	chr8	68085747	68255912	-	ENSG00000066777.4	22.959	21.7048	22.2328	37.9526	40.3379	38.0198
SUN2	1.25156	5.48975e-140	1.18846e-138	Up	27.3631	12.598	2.17202	chr22	39130730	39190148	-	ENSG00000100242.11	11.7132	12.5307	13.5502	28.1755	27.157	26.7568
CDKN1A	1.35802	1.50112e-139	3.23814e-138	Up	19.5816	8.0041	2.44644	chr6	36644305	36655116	+	ENSG00000124762.9	7.7779	8.36745	7.86695	19.4604	19.6372	19.6471
EXOC6B	0.864729	1.82788e-139	3.92897e-138	None	23.0142	13.5541	1.69796	chr2	72403113	73053170	-	ENSG00000144036.10	13.479	13.4307	13.7524	22.8921	23.4065	22.744
MUC16	2.80517	2.52586e-139	5.41001e-138	Up	17.1909	2.4362	7.05645	chr19	8959520	9092018	-	ENSG00000181143.11	2.75228	2.03812	2.5182	13.7363	17.8129	20.0237
MARCKS	0.847201	2.59104e-139	5.53e-138	None	84.2703	50.5822	1.66601	chr6	114178541	114184648	+	ENSG00000155130.5	51.2054	49.5446	50.9967	86.6773	87.6963	78.4373
PVRL1	1.18125	2.77885e-139	5.90995e-138	Up	29.757	14.7757	2.01392	chr11	119494120	119599794	-	ENSG00000110400.6	13.5028	15.0316	15.7926	28.5002	30.085	30.6858
CDC25A	-1.42127	2.90197e-139	6.15015e-138	Down	4.28059	12.063	0.354852	chr3	48198636	48229892	-	ENSG00000164045.7	12.7118	11.7072	11.7701	4.50966	4.23445	4.09765
DPH2	-1.21354	5.63851e-139	1.19079e-137	Down	12.8089	33.2811	0.384868	chr1	44435672	44439041	+	ENSG00000132768.9	32.4119	32.0037	35.4279	13.7723	12.9237	11.7306
DENND4C	0.997877	1.68021e-138	3.53606e-137	None	15.9854	8.6723	1.84327	chr9	19230433	19374139	+	ENSG00000137145.16	8.95847	8.49615	8.56229	15.7118	16.2794	15.965
COL4A5	0.855146	2.0859e-138	4.37461e-137	None	43.2302	26.5153	1.63039	chrX	107683074	107940775	+	ENSG00000188153.8	25.4839	26.7719	27.2902	44.3131	42.3856	42.9919
AMD1	-1.24361	1.90931e-137	3.99039e-136	Down	14.18	35.8664	0.395357	chr6	111195973	111216916	+	ENSG00000123505.10	38.2752	34.0102	35.3138	15.0917	14.1635	13.2848
EIF4A1	-0.836564	7.56778e-137	1.57619e-135	None	139.885	306.812	0.455932	chr17	7476024	7482323	+	ENSG00000161960.10	308.627	302.206	309.603	152.676	137.288	129.693
PCDH1	1.01843	8.18583e-137	1.69905e-135	Up	56.1765	30.6546	1.83256	chr5	141232938	141258811	-	ENSG00000156453.9	28.368	31.4699	32.1259	55.7654	56.3267	56.4373
SLC20A1	-1.21667	1.15097e-136	2.38077e-135	Down	11.2329	26.0189	0.431722	chr2	113403434	113421404	+	ENSG00000144136.6	26.9785	25.0875	25.9907	11.7694	10.9024	11.027
PTK7	1.01839	1.716e-136	3.53743e-135	Up	59.5007	31.2087	1.90654	chr6	43044006	43129457	+	ENSG00000112655.11	27.9448	34.7526	30.9286	61.7366	58.9724	57.793
XPO5	-0.811847	7.93398e-136	1.62997e-134	None	19.1305	36.0616	0.530497	chr6	43490072	43543812	-	ENSG00000124571.13	36.5582	35.8951	35.7314	19.2443	19.5994	18.5479
CCT4	-0.726719	1.10325e-135	2.25886e-134	None	108.966	211.488	0.515235	chr2	62095224	62115939	-	ENSG00000115484.10	214.303	209.489	210.67	115.562	112.407	98.9279
WDR3	-1.13875	1.5305e-134	3.12304e-133	Down	4.36111	10.7066	0.40733	chr1	118472343	118509165	+	ENSG00000065183.11	11.1637	10.6161	10.3399	4.70238	4.43003	3.95093
RPS26	-1.11987	3.57266e-134	7.26561e-133	Down	44.5974	103.706	0.430037	chr12	56435637	56438116	+	ENSG00000197728.5	107.003	106.368	97.7465	45.6846	44.3293	43.7784
PHB	-0.908963	4.28663e-134	8.68834e-133	None	68.3952	122.971	0.556188	chr17	47481414	47492246	-	ENSG00000167085.7	117.423	124.889	126.602	61.7926	67.2003	76.1927
SH3GLB2	0.940317	1.02805e-133	2.07674e-132	None	120.687	73.8065	1.63519	chr9	131769315	131790582	-	ENSG00000148341.13	68.4084	75.6645	77.3466	136.011	112.51	113.542
IGF1R	0.846009	1.37139e-133	2.76107e-132	None	50.8235	32.227	1.57705	chr15	99192200	99507759	+	ENSG00000140443.9	31.2165	31.8301	33.6343	51.6723	49.6222	51.176
CDC6	-1.05748	2.44132e-133	4.89886e-132	Down	12.0822	26.4873	0.45615	chr17	38443885	38459171	+	ENSG00000094804.5	27.1443	26.4008	25.9168	12.2217	12.5732	11.4517
HSP90AA1	-0.894621	5.19385e-133	1.03877e-131	None	282.989	564.905	0.50095	chr14	102547075	102606036	-	ENSG00000080824.14	587.306	553.214	554.194	290.095	297.413	261.459
PDCD4	1.28198	3.55828e-132	7.09307e-131	Up	23.7492	9.44363	2.51483	chr10	112631565	112659764	+	ENSG00000150593.11	9.23502	8.99781	10.0981	24.1055	24.9352	22.2068
ALPK1	1.52641	3.64798e-131	7.24795e-130	Up	10.9634	3.78454	2.8969	chr4	113206665	113363776	+	ENSG00000073331.13	3.6278	3.67377	4.05204	10.7386	11.5062	10.6455
EIF4B	0.65923	4.94941e-131	9.80145e-130	None	252.653	176.729	1.42961	chr12	53399942	53435993	+	ENSG00000063046.13	174.124	186.187	169.876	253.773	265.955	238.232
RRS1	-1.77902	6.31685e-131	1.24686e-129	Down	4.25811	15.8006	0.26949	chr8	67341263	67342966	+	ENSG00000179041.2	16.2927	15.8745	15.2346	4.71999	4.13865	3.91568
LDHB	-0.756293	7.00998e-131	1.37916e-129	None	184.096	336.882	0.54647	chr12	21788276	21910791	-	ENSG00000111716.8	342.657	337.163	330.826	190.604	186.884	174.799
PNPT1	-1.28065	9.69202e-131	1.90064e-129	Down	5.45269	14.2514	0.382607	chr2	55861400	55921045	-	ENSG00000138035.10	15.3186	13.7049	13.7308	5.65185	5.44206	5.26415
YWHAG	-0.757521	1.15119e-130	2.25022e-129	None	44.3379	80.9806	0.547512	chr7	75956116	75988348	-	ENSG00000170027.5	82.3316	80.3394	80.2707	44.3873	46.0281	42.5982
SEMA3A	0.810844	1.64142e-130	3.19812e-129	None	21.9597	13.9175	1.57785	chr7	83585093	84122040	-	ENSG00000075213.6	13.8418	14.1474	13.7632	21.9175	22.6131	21.3484
TUBB4B	-0.750352	2.28685e-130	4.44135e-129	None	162.142	294.982	0.549667	chr9	140135665	140138159	+	ENSG00000188229.5	285.386	299.735	299.825	162.473	167.014	156.939
NBR1	0.841029	1.55684e-129	3.01389e-128	None	41.7794	24.8945	1.67826	chr17	41322498	41363708	+	ENSG00000188554.9	24.873	24.2041	25.6063	42.5727	43.8365	38.9289
ERBB2	0.941848	1.74256e-129	3.36264e-128	None	37.5088	20.9198	1.79298	chr17	37844167	37886679	+	ENSG00000141736.9	20.6098	20.5489	21.6006	37.207	38.3075	37.0119
DCTPP1	-1.15489	3.24084e-129	6.23396e-128	Down	21.8887	52.761	0.414866	chr16	30434940	30441396	-	ENSG00000179958.4	52.7431	52.6371	52.9028	20.9579	22.5564	22.152
ITGB4	0.884335	3.52709e-129	6.76306e-128	None	204.205	119.187	1.71331	chr17	73717408	73753899	+	ENSG00000132470.9	112.738	122.193	122.632	200.791	206.876	204.95
DDX56	-0.944729	3.61304e-129	6.90594e-128	None	20.6359	43.9136	0.469921	chr7	44605016	44614650	-	ENSG00000136271.6	44.0684	43.0677	44.6047	19.78	22.3257	19.8021
PBX1	0.820135	8.35403e-129	1.59175e-127	None	65.7148	36.7865	1.78638	chr1	164524821	164868533	+	ENSG00000185630.14	33.7294	37.8169	38.8133	63.727	64.8152	68.6021
ENO1	-0.65605	1.53718e-128	2.91968e-127	None	513.885	874.471	0.587652	chr1	8921061	8939308	-	ENSG00000074800.9	857.627	886.932	878.856	527.894	519.44	494.32
CELSR1	1.10082	2.01464e-128	3.81455e-127	Up	10.427	5.22565	1.99535	chr22	46756731	46933067	-	ENSG00000075275.12	4.93176	5.28262	5.46257	9.89215	11.0257	10.3631
C1QBP	-1.18061	6.02836e-128	1.13785e-126	Down	46.8263	113.868	0.411233	chr17	5336097	5352150	-	ENSG00000108561.4	116.789	114.26	110.556	49.113	49.6556	41.7104
NUP188	-0.728328	6.25883e-128	1.17767e-126	None	37.003	64.9911	0.569355	chr9	131709978	131769375	+	ENSG00000095319.10	64.4122	64.5353	66.0258	37.3371	37.0068	36.665
CLSPN	-1.09696	7.21299e-128	1.353e-126	Down	9.6571	20.971	0.460498	chr1	36185819	36235568	-	ENSG00000092853.9	21.7545	21.2428	19.9158	9.93571	9.49465	9.54095
SLC19A1	-1.54884	7.67318e-128	1.43486e-126	Down	3.43106	10.1808	0.337014	chr21	46913486	46964325	-	ENSG00000173638.14	10.1007	9.94847	10.4931	3.09998	3.55254	3.64065
KIAA1109	0.863016	9.08401e-128	1.69344e-126	None	17.453	9.84027	1.77363	chr4	123073488	123283913	+	ENSG00000138688.11	10.282	9.35272	9.88605	18.1	16.7709	17.488
SLC7A5	-0.81668	1.26088e-127	2.34329e-126	None	27.5749	52.5091	0.525145	chr16	87863629	87903094	-	ENSG00000103257.4	50.7258	53.0121	53.7893	27.4826	28.1816	27.0603
KIAA0430	0.953637	2.72566e-127	5.04999e-126	None	18.8939	10.3002	1.83432	chr16	15688243	15737023	-	ENSG00000166783.15	10.3509	10.1485	10.4012	18.6686	19.211	18.8021
SLC5A6	-0.920286	2.73528e-127	5.05233e-126	None	24.995	53.3637	0.468389	chr2	27422455	27435826	-	ENSG00000138074.10	51.0507	56.2607	52.7798	24.6649	25.8964	24.4236
ITM2B	1.02856	4.6207e-127	8.50885e-126	Up	34.7193	18.2064	1.90698	chr13	48807294	48837063	+	ENSG00000136156.8	18.3173	18.53	17.7718	34.6188	36.5913	32.9477
HSPA1A	-1.08709	1.05294e-126	1.93306e-125	Down	12.284	28.197	0.43565	chr6	31783291	31785723	+	ENSG00000204389.8	27.0785	28.9453	28.5674	12.606	12.4958	11.7503
ST3GAL1	-1.11726	2.57784e-126	4.71822e-125	Down	6.05039	12.3852	0.488517	chr8	134467091	134584183	-	ENSG00000008513.10	11.9277	12.4876	12.7404	6.41887	6.5654	5.16689
FARSB	-1.03038	3.24864e-126	5.92804e-125	Down	11.3449	25.0147	0.453529	chr2	223435255	223521056	-	ENSG00000116120.8	25.4888	25.2604	24.2949	11.8965	11.3726	10.7656
BMP5	1.19131	3.94889e-126	7.18412e-125	Up	10.5218	4.97813	2.11361	chr6	55618443	55740362	-	ENSG00000112175.6	5.02243	4.9212	4.99077	10.8966	10.5348	10.134
AKAP9	0.89855	6.33192e-126	1.14849e-124	None	20.3492	11.6793	1.74234	chr7	91570181	91739987	+	ENSG00000127914.12	9.83954	12.7915	12.4068	17.3414	20.9075	22.7988
ATRN	0.7454	1.08923e-125	1.96975e-124	None	26.1228	16.4889	1.58426	chr20	3451687	3631769	+	ENSG00000088812.13	16.0029	16.8171	16.6467	25.3906	28.4374	24.5403
MARS2	-1.18994	1.39683e-125	2.51846e-124	Down	6.88814	16.9844	0.405557	chr2	198570087	198573113	+	ENSG00000247626.3	17.3092	16.5693	17.0747	6.8213	6.96333	6.87979
ETF1	-0.784517	1.85568e-125	3.3358e-124	None	39.5597	73.7421	0.536461	chr5	137841784	137878989	-	ENSG00000120705.8	77.7376	72.5219	70.9668	40.9099	40.2479	37.5215
WBP1	1.36791	2.09402e-125	3.75309e-124	Up	27.9239	11.1362	2.50748	chr2	74685456	74688018	+	ENSG00000239779.2	10.0947	11.207	12.1069	28.0634	28.1838	27.5245
DDX17	0.651742	4.59529e-125	8.2117e-124	None	174.032	120.354	1.446	chr22	38879445	38903665	-	ENSG00000100201.14	120.889	119.33	120.844	175.054	181.092	165.951
GALNT7	0.866649	9.46216e-125	1.68588e-123	None	59.0516	34.9981	1.68728	chr4	174089904	174245118	+	ENSG00000109586.7	36.3183	33.6926	34.9834	61.0118	60.6363	55.5068
IRAK1	-1.07398	1.80719e-124	3.21042e-123	Down	18.0811	40.7575	0.443625	chrX	153275951	153285431	-	ENSG00000184216.7	38.7479	42.2364	41.2882	17.8695	16.7595	19.6142
GCLM	-1.18245	2.69759e-124	4.77813e-123	Down	4.75929	11.4021	0.417405	chr1	94350761	94374966	-	ENSG00000023909.5	11.3815	11.0111	11.8137	4.91543	4.75971	4.60274
LRP10	1.24643	5.91739e-124	1.04506e-122	Up	15.3189	7.05478	2.17142	chr14	23340822	23350789	+	ENSG00000197324.4	6.35068	7.18493	7.62873	15.5689	14.9697	15.4179
CCT3	-0.754574	1.13045e-123	1.99065e-122	None	124.805	233.268	0.535029	chr1	156278759	156337664	-	ENSG00000163468.10	220.046	228.055	251.704	120.829	144.918	108.67
ADORA2B	-0.904124	1.89587e-123	3.3288e-122	None	28.8941	58.4852	0.494041	chr17	15848231	15879060	+	ENSG00000170425.3	59.1874	57.749	58.5191	29.7906	29.504	27.3877
NAA15	-0.974236	2.27522e-123	3.98329e-122	None	11.1406	22.328	0.498951	chr4	140222609	140341187	+	ENSG00000164134.8	23.3498	21.8392	21.7952	10.9632	11.2775	11.1811
NSUN2	-0.919027	2.59671e-123	4.53299e-122	None	22.5868	45.0626	0.501232	chr5	6599352	6633404	-	ENSG00000037474.10	46.338	44.1393	44.7105	23.4964	22.5724	21.6916
MTUS1	1.31193	2.82496e-123	4.91723e-122	Up	10.6868	2.87959	3.71123	chr8	17501304	17658426	-	ENSG00000129422.9	2.71091	2.84389	3.08396	10.1604	13.9107	7.98935
PDE7A	0.848051	3.00132e-123	5.20918e-122	None	53.1819	30.0551	1.76948	chr8	66629745	66754557	-	ENSG00000205268.6	30.3797	30.0039	29.7816	52.5092	53.8445	53.1919
AHR	0.777769	3.25629e-123	5.63553e-122	None	33.7972	21.071	1.60396	chr7	17338246	17385776	+	ENSG00000106546.8	21.5079	20.946	20.7592	34.3645	34.3731	32.6539
PLXNB2	0.936562	4.75995e-123	8.21431e-122	None	61.5652	35.1006	1.75397	chr22	50713408	50746056	-	ENSG00000196576.10	33.3952	36.0433	35.8631	61.1885	61.7567	61.7505
MCM10	-1.08425	5.40453e-123	9.30011e-122	Down	7.62114	16.8983	0.451	chr10	13203554	13253104	+	ENSG00000065328.12	16.8271	16.2598	17.608	8.26474	7.9273	6.67138
TRAK1	0.940702	6.59547e-123	1.13172e-121	None	15.6904	8.57027	1.8308	chr3	42055294	42267381	+	ENSG00000182606.10	8.35249	8.70927	8.64906	15.5704	16.3535	15.1473
CDC14B	0.967603	6.77433e-123	1.15912e-121	None	24.8519	13.7847	1.80286	chr9	99252523	99382112	-	ENSG00000081377.12	13.359	13.7414	14.2536	25.1079	24.5121	24.9356
CLMN	0.804679	3.17055e-122	5.40963e-121	None	19.8786	11.7801	1.68747	chr14	95648277	95786243	-	ENSG00000165959.7	11.634	11.4727	12.2336	19.376	20.0464	20.2134
RAB3D	1.27863	7.22161e-121	1.22869e-119	Up	11.1734	4.97231	2.24712	chr19	11432722	11456946	-	ENSG00000105514.3	4.66089	5.00794	5.2481	11.2356	11.0277	11.2568
DSG3	1.01093	7.53643e-121	1.27865e-119	Up	13.0195	6.97681	1.86611	chr18	29027758	29058665	+	ENSG00000134757.4	6.79459	6.88389	7.25196	12.9	13.4068	12.7517
CAD	-0.776032	9.04094e-121	1.52962e-119	None	24.7504	46.0676	0.537261	chr2	27440258	27466811	+	ENSG00000084774.9	45.484	45.0133	47.7057	25.5245	24.5293	24.1974
DUSP7	-1.18435	1.05323e-120	1.77696e-119	Down	5.88724	14.4004	0.408824	chr3	52082935	52090566	-	ENSG00000164086.8	14.6201	14.1648	14.4164	5.83329	6.144	5.68445
PDK2	1.34675	1.13935e-120	1.91691e-119	Up	11.599	5.50088	2.10857	chr17	48172101	48189516	+	ENSG00000005882.7	5.11383	5.47611	5.91272	11.3922	11.273	12.1318
THBS3	1.77895	1.92289e-120	3.22618e-119	Up	11.9485	4.1248	2.89674	chr1	155165379	155178842	-	ENSG00000169231.9	2.968	4.62589	4.7805	11.9661	11.0183	12.8611
TUBA1A	-0.992191	2.41182e-120	4.03529e-119	None	66.7471	157.279	0.424386	chr12	49578579	49583107	-	ENSG00000167552.9	174.25	138.261	159.327	67.9435	70.9201	61.3776
LMO4	0.970566	3.96196e-120	6.61057e-119	None	37.0211	18.6056	1.98978	chr1	87794151	87814606	+	ENSG00000143013.8	17.4606	19.1189	19.2372	34.2746	36.0095	40.7791
XPO6	-0.755288	5.10398e-120	8.49257e-119	None	31.8944	54.252	0.587893	chr16	28109300	28223241	-	ENSG00000169180.7	53.873	54.4502	54.433	33.0231	31.4624	31.1977
DSP	0.699141	9.16287e-120	1.52043e-118	None	31.4524	21.0162	1.49658	chr6	7541808	7586950	+	ENSG00000096696.9	18.6565	21.9613	22.4308	32.1355	28.81	33.4115
FEN1	-0.963401	9.56657e-120	1.58307e-118	None	17.4424	36.7345	0.474824	chr11	61560109	61564716	+	ENSG00000168496.3	37.4033	37.1506	35.6496	17.6015	17.6557	17.0701
SPINT1	0.941285	1.98337e-119	3.2731e-118	None	48.8904	27.8828	1.75343	chr15	41136216	41150405	+	ENSG00000166145.10	26.8788	27.8083	28.9612	48.2029	47.945	50.5231
CSE1L	-0.840568	2.19211e-119	3.60773e-118	None	62.9612	122.056	0.51584	chr20	47662849	47713489	+	ENSG00000124207.12	128.326	118.829	119.012	64.476	64.3968	60.0109
XRN1	0.860809	2.01694e-118	3.31041e-117	None	14.1689	9.02328	1.57026	chr3	142025449	142166904	-	ENSG00000114127.6	9.12072	8.90461	9.04451	14.1988	14.7898	13.5181
RHOBTB2	0.953907	2.07444e-118	3.39556e-117	None	33.9747	17.5557	1.93525	chr8	22844930	22877712	+	ENSG00000008853.12	16.3713	17.6176	18.6783	32.873	34.0453	35.0059
PPL	0.913041	2.28462e-118	3.7295e-117	None	35.7925	20.7313	1.7265	chr16	4932508	5010742	-	ENSG00000118898.11	19.7336	21.1758	21.2845	35.3389	35.8857	36.1528
RPF2	-1.37105	3.55398e-118	5.78599e-117	Down	6.46789	18.7424	0.345093	chr6	111303218	111349466	+	ENSG00000197498.8	19.9242	19.1461	17.1569	5.81834	7.40036	6.18496
EMP2	0.929045	4.1768e-118	6.78168e-117	None	22.3595	12.8986	1.73348	chr16	10622279	10674555	-	ENSG00000213853.5	12.1836	12.8613	13.6509	22.5747	22.0376	22.4663
KM-PA-2	-1.57014	4.61817e-118	7.47822e-117	Down	7.13642	22.9089	0.311514	chr8	145317003	145331153	-	ENSG00000204775.4	20.9613	24.5035	23.2617	7.13905	6.77261	7.49761
BTN3A2	1.26981	6.84065e-118	1.10475e-116	Up	13.7891	6.13102	2.24908	chr6	26365387	26378546	+	ENSG00000186470.9	6.01356	6.426	5.9535	14.7079	13.5886	13.071
TIMP3	0.965865	1.27908e-117	2.06017e-116	None	24.9965	13.823	1.80833	chr22	33197687	33259030	+	ENSG00000100234.11	13.2162	13.7108	14.5419	25.7242	24.8444	24.4209
CDK19	1.06429	1.89585e-117	3.04547e-116	Up	10.6132	5.59931	1.89544	chr6	110931181	111137161	-	ENSG00000155111.10	5.6738	5.33825	5.78587	10.2512	11.0057	10.5826
GATA3	1.0041	2.62276e-117	4.20198e-116	Up	47.1049	25.5983	1.84016	chr10	8095567	8117161	+	ENSG00000107485.11	24.8149	25.2397	26.7404	45.5164	48.0815	47.717
ARHGDIA	-0.854465	3.17788e-117	5.07788e-116	None	69.2477	166.013	0.417122	chr17	79825597	79829282	-	ENSG00000141522.7	176.436	195.782	125.821	75.1129	62.1625	70.4676
CHD6	0.849987	4.43641e-117	7.07016e-116	None	12.726	7.40199	1.71927	chr20	40030741	40247133	-	ENSG00000124177.10	7.35875	7.31305	7.53418	12.6297	12.9991	12.5493
NME1	-1.31191	2.53318e-116	4.02642e-115	Down	25.4884	71.4919	0.356522	chr17	49230897	49239789	+	ENSG00000239672.3	71.8385	77.4803	65.1568	25.5088	25.8279	25.1285
TCP1	-0.932079	3.29355e-116	5.22127e-115	None	70.4677	140.255	0.502426	chr6	160199530	160210781	-	ENSG00000120438.7	145.98	141.548	133.236	71.0526	71.7599	68.5904
LIMK2	1.11805	8.13679e-115	1.28655e-113	Up	23.1709	11.1743	2.07359	chr22	31608225	31676066	+	ENSG00000182541.13	10.6349	11.311	11.5771	23.9345	22.2624	23.3158
VIPR1	1.30078	8.21081e-115	1.29486e-113	Up	13.9735	6.16053	2.26823	chr3	42530791	42579059	+	ENSG00000114812.8	5.9911	6.05498	6.43552	13.4051	14.3893	14.126
PNO1	-1.44777	8.23889e-115	1.29591e-113	Down	5.77316	16.7739	0.344176	chr2	68384976	68403370	+	ENSG00000115946.3	17.4031	16.756	16.1625	5.72931	6.37186	5.21831
UBE2S	-0.942942	1.43396e-114	2.24964e-113	None	52.7262	109.947	0.47956	chr19	55912652	55919145	-	ENSG00000108106.9	105.349	114.255	110.237	53.58	52.345	52.2536
DSC2	0.905096	3.15346e-114	4.93442e-113	None	17.6534	10.1745	1.73507	chr18	28645940	28682378	-	ENSG00000134755.10	10.3157	10.0123	10.1954	18.2544	18.1414	16.5644
LTBP3	1.10701	3.50005e-114	5.46262e-113	Up	41.7911	21.082	1.98231	chr11	65306276	65326401	-	ENSG00000168056.10	19.8925	21.2944	22.059	40.1746	41.9421	43.2566
TIMM17A	-1.12521	4.56946e-114	7.11328e-113	Down	20.1036	46.7544	0.429984	chr1	201924619	201939789	+	ENSG00000134375.6	47.4176	46.6956	46.1501	20.3977	21.7891	18.1242
MAT2A	-0.857536	1.0005e-113	1.55347e-112	None	98.5456	192.813	0.511093	chr2	85766288	85772403	+	ENSG00000168906.8	202.762	186.379	189.299	101.835	102.425	91.3757
RERE	0.94412	2.00478e-113	3.10483e-112	None	20.5235	11.4264	1.79615	chr1	8412457	8877702	-	ENSG00000142599.13	11.5058	11.572	11.2013	19.2478	21.4983	20.8246
ASAH1	0.913065	2.04087e-113	3.15264e-112	None	49.4278	26.5787	1.85968	chr8	17913934	17942494	-	ENSG00000104763.13	26.3656	27.1385	26.232	48.2694	53.2962	46.7177
PRSS8	1.10056	3.10233e-113	4.78013e-112	Up	42.4003	21.3926	1.98201	chr16	31142756	31147083	-	ENSG00000052344.11	19.8544	21.8753	22.4482	42.4224	42.6206	42.1578
PLD3	1.28301	8.72149e-113	1.3404e-111	Up	30.413	15.3556	1.98058	chr19	40854363	40886346	+	ENSG00000105223.14	14.0067	17.5255	14.5347	30.4953	29.6126	31.1311
LNPEP	0.827067	1.18684e-112	1.81942e-111	None	19.8733	12.3286	1.61197	chr5	96271098	96373219	+	ENSG00000113441.11	12.976	11.9851	12.0247	19.4708	19.8629	20.2862
PSMC4	-0.898523	1.20763e-112	1.84661e-111	None	41.0535	83.2739	0.492994	chr19	40476912	40487348	+	ENSG00000013275.3	82.9507	87.194	79.6769	40.0239	42.5629	40.5738
HSP90AB1	-0.711963	1.37676e-112	2.09991e-111	None	498.103	881.005	0.56538	chr6	44214824	44221620	+	ENSG00000096384.15	876.069	900.331	866.617	506.104	523.534	464.67
DDX39A	-0.980184	1.63515e-112	2.48773e-111	None	26.6069	57.6542	0.461491	chr19	14519631	14530192	-	ENSG00000123136.10	58.2079	57.2568	57.4978	27.2695	27.0699	25.4812
SNAP23	1.26453	1.84196e-112	2.79533e-111	Up	17.1156	8.36602	2.04584	chr15	42783431	42837547	+	ENSG00000092531.5	7.2454	8.4008	9.45184	18.7905	16.5409	16.0153
C5AR1	2.1871	1.99527e-112	3.0204e-111	Up	12.2957	3.12513	3.93446	chr19	47793280	47825323	+	ENSG00000197405.3	2.63671	3.17527	3.56341	12.0136	12.5322	12.3413
ANLN	-0.758349	6.19322e-112	9.35176e-111	None	54.1369	98.9938	0.546871	chr7	36429415	36493400	+	ENSG00000011426.6	102.364	97.4515	97.1661	54.9697	56.6052	50.8358
BCAR3	-0.945708	8.11115e-112	1.22173e-110	None	12.6473	26.13	0.484014	chr1	94027347	94312706	-	ENSG00000137936.12	25.274	26.2891	26.8268	12.7713	12.594	12.5765
SLC7A1	-0.742502	9.19457e-112	1.38147e-110	None	12.5549	22.7622	0.551567	chr13	30083547	30169825	-	ENSG00000139514.8	22.9535	22.6188	22.7144	12.7688	12.6827	12.2132
CALB2	-1.39402	1.11358e-111	1.66899e-110	Down	8.87847	25.2963	0.350979	chr16	71392616	71424341	+	ENSG00000172137.14	25.9871	24.4886	25.4133	8.87886	10.2672	7.48933
NEK9	0.844497	1.68596e-111	2.5206e-110	None	17.4314	10.529	1.65555	chr14	75548822	75594047	-	ENSG00000119638.8	10.4812	10.4739	10.632	17.4825	17.2699	17.5417
F11R	0.738855	1.22811e-110	1.83155e-109	None	43.7724	28.293	1.54711	chr1	160965001	160991138	-	ENSG00000158769.13	28.6573	27.9952	28.2264	45.0293	45.337	40.9509
EIF2S1	-0.872592	1.76776e-110	2.62987e-109	None	17.8976	34.6767	0.516128	chr14	67826714	67853233	+	ENSG00000134001.8	35.1891	34.9835	33.8574	18.1425	18.1422	17.4081
SCEL	0.983358	3.14748e-110	4.67096e-109	None	22.7372	12.2523	1.85575	chr13	78109809	78219398	+	ENSG00000136155.12	12.5966	12.191	11.9694	22.6698	23.8913	21.6506
IFT80	0.945516	5.14659e-110	7.61897e-109	None	18.7306	10.3981	1.80134	chr3	159974774	160117668	-	ENSG00000068885.10	10.5019	10.5525	10.1399	18.5069	19.494	18.1908
ARL4C	-0.818103	8.29535e-110	1.22503e-108	None	17.7489	33.3494	0.532209	chr2	235401685	235405697	-	ENSG00000188042.5	35.1274	31.836	33.0848	17.3494	18.5711	17.3261
PLEKHF2	0.964779	1.18904e-109	1.75165e-108	None	26.0324	14.3991	1.80791	chr8	96146032	96168912	+	ENSG00000175895.3	14.4578	14.7137	14.0258	27.4047	26.2639	24.4285
RANBP1	-0.961708	1.39211e-109	2.04582e-108	None	43.1617	94.1307	0.45853	chr22	20103461	20114878	+	ENSG00000099901.12	95.5563	95.1787	91.657	42.2404	47.0198	40.2249
HECA	1.05363	1.41551e-109	2.07517e-108	Up	10.5111	5.46642	1.92284	chr6	139456249	139501939	+	ENSG00000112406.4	5.26615	5.41491	5.71821	10.4348	11.033	10.0653
PRPF4	-0.850773	1.89845e-109	2.77643e-108	None	24.3466	46.5079	0.523493	chr9	116037623	116055185	+	ENSG00000136875.8	46.6416	46.5312	46.3508	25.2868	24.4074	23.3455
AK2	-0.737972	2.8735e-109	4.19226e-108	None	70.6921	120.055	0.588831	chr1	33473585	33546597	-	ENSG00000004455.12	121.418	120	118.747	73.3414	69.8023	68.9325
ATP5B	-0.664967	3.52381e-109	5.12863e-108	None	250.041	443.937	0.563236	chr12	57031959	57039798	-	ENSG00000110955.4	443.837	451.462	436.514	255.057	262.591	232.476
WDR62	-1.33369	8.79072e-109	1.27635e-107	Down	4.12028	11.1017	0.37114	chr19	36545783	36596008	+	ENSG00000075702.12	10.4918	11.487	11.3262	4.29484	3.72753	4.33846
PRPS1	-1.32437	1.51011e-108	2.18731e-107	Down	9.67358	26.0365	0.37154	chrX	106871737	106894256	+	ENSG00000147224.6	26.4771	26.1704	25.4618	9.2881	10.9042	8.8284
IRF1	1.23048	2.14351e-108	3.09731e-107	Up	14.5655	6.58952	2.2104	chr5	131817301	131826490	-	ENSG00000125347.9	5.96595	6.85938	6.94324	14.5204	14.5436	14.6324
CD109	0.857438	2.19919e-108	3.17019e-107	None	22.3265	13.4157	1.66421	chr6	74405508	74538040	+	ENSG00000156535.9	13.689	12.8587	13.6994	22.546	23.2959	21.1376
LGALS3BP	0.941421	5.08255e-108	7.3092e-107	None	118.054	58.5077	2.01775	chr17	76967320	76976191	-	ENSG00000108679.8	53.7327	58.8313	62.959	106.074	101.848	146.24
BCAS3	1.40799	5.20282e-108	7.46438e-107	Up	11.4672	4.51501	2.53979	chr17	58754814	59470199	+	ENSG00000141376.16	4.16497	4.76078	4.61929	11.9504	10.7996	11.6515
C10orf54	0.944586	5.54405e-108	7.93508e-107	None	18.8053	10.2938	1.82686	chr10	73507316	73533255	-	ENSG00000107738.15	9.66416	10.4967	10.7204	18.5577	18.9775	18.8806
PPP1R12B	0.961235	7.75028e-108	1.10666e-106	None	33.6933	16.477	2.04487	chr1	202317827	202561834	+	ENSG00000077157.16	16.4371	16.5547	16.4392	34.7597	30.6918	35.6284
DDX18	-0.88864	9.62495e-108	1.3711e-106	None	19.072	37.4451	0.509331	chr2	118572226	118589955	+	ENSG00000088205.8	39.4254	36.571	36.3389	19.3997	20.1288	17.6874
ESRP1	0.627702	1.03102e-107	1.46526e-106	None	87.0605	61.2522	1.42135	chr8	95653302	95719694	+	ENSG00000104413.11	61.8326	61.3898	60.5342	88.6623	88.3975	84.1219
GPR107	0.706365	1.75281e-107	2.4852e-106	None	28.6653	20.611	1.39078	chr9	132815705	132902448	+	ENSG00000148358.15	20.4281	19.2207	22.1841	29.7789	27.5351	28.6819
TTF2	-0.932689	2.05871e-107	2.91208e-106	None	5.64957	11.5625	0.488613	chr1	117602925	117650075	+	ENSG00000116830.7	11.874	11.4625	11.3509	5.98991	5.82682	5.13199
VSIG10	0.807109	2.56278e-107	3.61663e-106	None	33.5464	19.939	1.68245	chr12	118501398	118573831	-	ENSG00000176834.9	19.3817	20.2637	20.1715	33.0401	33.5532	34.0459
PDLIM5	0.658573	2.88902e-107	4.06753e-106	None	55.9932	37.0374	1.5118	chr4	95373037	95589377	+	ENSG00000163110.10	35.4371	42.9876	32.6875	59.7345	56.518	51.7271
TMEM159	1.15891	2.92536e-107	4.10911e-106	Up	25.7544	13.0443	1.97437	chr16	21169698	21191937	+	ENSG00000011638.6	11.8486	13.8636	13.4208	27.3545	27.1374	22.7712
RARRES3	2.82802	3.87077e-107	5.42446e-106	Up	11.8015	1.97306	5.98132	chr11	63304281	63313934	+	ENSG00000133321.6	1.69043	2.10506	2.12369	11.7967	12.3372	11.2706
HGSNAT	0.928547	5.55559e-107	7.76753e-106	None	14.8378	7.94173	1.86834	chr8	42995556	43057998	+	ENSG00000165102.10	8.00861	8.02331	7.79326	14.7335	14.7952	14.9847
MCM4	-0.649759	8.67025e-107	1.20943e-105	None	75.5831	127.222	0.594105	chr8	48872745	48890720	+	ENSG00000104738.12	125.459	130.446	125.761	77.3812	77.4683	71.8999
TMC6	1.63877	9.17451e-107	1.27682e-105	Up	12.1257	4.97306	2.43829	chr17	76106539	76128488	-	ENSG00000141524.11	4.40761	5.58363	4.92793	12.5352	11.734	12.108
OAS1	1.29249	9.26445e-107	1.28637e-105	Up	22.6865	9.61817	2.35871	chr12	113344582	113369990	+	ENSG00000089127.8	9.13046	10.0854	9.63865	24.2538	22.1203	21.6853
TMEM44	1.2996	1.01927e-106	1.41201e-105	Up	15.6377	6.84234	2.28543	chr3	194308402	194354418	-	ENSG00000145014.13	6.7793	6.8814	6.86633	15.084	16.2724	15.5566
PTRF	-0.850143	1.03842e-106	1.43525e-105	None	24.4817	47.6913	0.513338	chr17	40554470	40575535	-	ENSG00000177469.12	45.2071	49.1617	48.705	24.5365	24.7727	24.1359
DKC1	-1.16116	1.13347e-106	1.56305e-105	Down	11.3161	26.1077	0.433438	chrX	153991031	154005964	+	ENSG00000130826.11	25.4595	26.9349	25.9287	13.0783	11.0016	9.86833
YWHAH	-0.91134	1.21198e-106	1.66751e-105	None	36.305	73.5611	0.493536	chr22	32340447	32353590	+	ENSG00000128245.10	74.6573	73.4221	72.6038	34.9007	39.2341	34.7803
AHSA1	-1.00804	1.63098e-106	2.2389e-105	Down	29.7678	59.2122	0.50273	chr14	77924213	77935817	+	ENSG00000100591.3	59.1954	60.6585	57.7828	27.9312	28.9388	32.4334
SKIL	0.873926	4.09995e-106	5.61536e-105	None	31.8908	14.0193	2.27478	chr3	170075466	170114623	+	ENSG00000136603.9	12.6275	17.4585	11.9718	35.0962	30.5345	30.0417
ADAM10	0.689118	4.19216e-106	5.72865e-105	None	50.2496	33.47	1.50133	chr15	58887403	59042177	-	ENSG00000137845.10	34.4085	32.8892	33.1122	51.245	50.4712	49.0326
RPL7L1	-0.836969	6.06834e-106	8.27376e-105	None	22.5492	40.9524	0.550619	chr6	42847356	42857663	+	ENSG00000146223.10	40.5875	40.623	41.6466	21.3668	24.2077	22.073
SP100	0.999986	2.18059e-105	2.96638e-104	None	21.194	10.6088	1.99777	chr2	231280657	231408805	+	ENSG00000067066.12	10.37	10.4134	11.0432	21.6638	22.0384	19.8799
ACOX1	0.905317	2.19107e-105	2.97395e-104	None	22.9864	13.6441	1.68471	chr17	73937588	73975515	-	ENSG00000161533.7	13.0093	14.3831	13.54	23.5555	21.7583	23.6454
ING4	1.45311	1.20295e-104	1.62911e-103	Up	17.795	7.47267	2.38135	chr12	6759446	6772314	-	ENSG00000111653.15	7.09044	7.48149	7.84608	16.4327	19.1327	17.8197
OS9	0.858781	1.22714e-104	1.65815e-103	None	48.1718	29.0471	1.6584	chr12	58087738	58115340	+	ENSG00000135506.11	27.2638	30.3215	29.5561	48.312	50.0864	46.1169
GNL3	-1.05509	1.55542e-104	2.09703e-103	Down	17.6682	40.1826	0.439697	chr3	52715172	52728508	+	ENSG00000163938.12	41.4625	39.7583	39.327	18.3195	18.4615	16.2236
RSL1D1	-0.849145	1.66541e-104	2.24032e-103	None	19.1451	38.9262	0.491831	chr16	11929056	11945442	-	ENSG00000171490.8	39.754	38.4161	38.6084	19.764	18.0596	19.6117
ALDH1A3	-0.693854	1.907e-104	2.55961e-103	None	72.8221	128.096	0.568494	chr15	101417919	101456831	+	ENSG00000184254.12	129.056	126.12	129.113	76.1465	73.6766	68.6432
NIP7	-1.25563	2.49163e-104	3.33691e-103	Down	7.79227	20.1194	0.387301	chr16	69373333	69377014	+	ENSG00000132603.9	19.5931	20.3995	20.3656	8.24094	8.10373	7.03212
RABEPK	-1.26868	3.0056e-104	4.01633e-103	Down	8.94095	23.7907	0.375816	chr9	127962821	127996437	+	ENSG00000136933.12	24.3919	23.6377	23.3426	9.63961	8.64154	8.54169
FARSA	-0.890042	5.00344e-104	6.67125e-103	None	25.4598	51.5663	0.493729	chr19	13033293	13044851	-	ENSG00000179115.6	50.1985	52.5608	51.9396	27.0288	25.3859	23.9647
EEF1A1	0.638601	5.63461e-104	7.49626e-103	None	1922.88	1356.78	1.41725	chr6	74225473	74233520	-	ENSG00000156508.13	1279.69	1356.18	1434.46	1954.8	2049.06	1764.79
TSPAN2	1.14718	6.01976e-104	7.99107e-103	Up	13.4165	6.6538	2.01636	chr1	115590632	115632121	-	ENSG00000134198.5	6.7025	6.66053	6.59837	13.7268	14.0734	12.4492
SPTLC3	1.30468	8.06115e-104	1.06775e-102	Up	10.7122	4.33482	2.4712	chr20	12989627	13147411	+	ENSG00000172296.8	4.205	4.39165	4.40782	11.5028	10.3614	10.2724
ID3	1.01325	2.49308e-103	3.29501e-102	Up	45.0848	24.2736	1.85736	chr1	23884409	23886285	-	ENSG00000117318.8	23.4979	25.16	24.163	46.0081	44.1561	45.0903
PJA2	0.803922	2.79017e-103	3.67962e-102	None	21.5882	13.2043	1.63494	chr5	108670410	108745695	-	ENSG00000198961.5	13.131	13.3683	13.1136	22.1951	22.1746	20.3949
SDCBP	0.761239	4.14072e-103	5.4488e-102	None	92.467	50.8797	1.81736	chr8	59465483	59495419	+	ENSG00000137575.7	36.0633	60.3305	56.2454	90.3138	95.9229	91.1644
UBE2H	0.79875	4.52978e-103	5.94779e-102	None	27.0817	15.9965	1.69298	chr7	129470572	129592789	-	ENSG00000186591.7	15.9685	15.5949	16.426	27.395	26.5679	27.2822
NTN4	0.806189	5.23162e-103	6.85444e-102	None	32.4011	20.37	1.59062	chr12	96051583	96184930	-	ENSG00000074527.7	20.1339	20.9361	20.0401	33.7849	31.8796	31.5387
MRTO4	-1.40151	6.68668e-103	8.7419e-102	Down	6.53007	18.4309	0.354299	chr1	19578033	19586622	+	ENSG00000053372.4	17.5076	19.9519	17.8333	6.86631	6.59527	6.12863
DTX3L	0.779748	1.08392e-102	1.41401e-101	None	17.5007	11.0198	1.58812	chr3	122283085	122294050	+	ENSG00000163840.5	10.9697	10.845	11.2446	17.6965	17.7466	17.0591
LITAF	0.680679	1.14668e-102	1.49266e-101	None	127.279	85.8794	1.48207	chr16	11641853	11730237	-	ENSG00000189067.8	81.3877	89.2009	87.0497	128.476	129.499	123.862
TXNRD1	-0.643365	1.20071e-102	1.55963e-101	None	74.1109	114.821	0.645449	chr12	104609557	104744061	+	ENSG00000198431.11	114.721	116.157	113.584	72.953	73.6473	75.7325
SELRC1	-1.3946	2.00726e-102	2.60168e-101	Down	6.95636	19.5595	0.355651	chr1	53152508	53164038	-	ENSG00000162377.4	19.4842	20.1577	19.0367	7.48611	6.54563	6.83733
CAPN1	0.797465	2.29858e-102	2.9729e-101	None	141.404	85.5781	1.65234	chr11	64948037	64979477	+	ENSG00000014216.11	81.1258	87.7112	87.8974	139.355	141.963	142.894
RBPMS	1.42283	1.64569e-101	2.12393e-100	Up	31.3713	12.5397	2.50176	chr8	30241944	30429778	+	ENSG00000157110.11	12.267	12.5424	12.8097	31.9633	29.8912	32.2594
TRIQK	1.11369	1.77156e-101	2.2815e-100	Up	16.5424	7.97843	2.07339	chr8	93895758	94029901	-	ENSG00000205133.7	7.51677	7.99621	8.4223	17.515	16.9264	15.1859
PSMD11	-0.768899	1.78632e-101	2.29561e-100	None	40.7303	75.0541	0.542679	chr17	30771279	30810336	+	ENSG00000108671.5	73.5368	74.4498	77.1756	41.483	43.1586	37.5493
CHD3	0.707865	3.32747e-101	4.26707e-100	None	38.6878	25.7042	1.50511	chr17	7788124	7816078	+	ENSG00000170004.12	25.8866	25.7004	25.5257	41.4127	38.0525	36.5982
PTDSS1	-0.706233	4.64651e-101	5.94595e-100	None	28.6038	51.0885	0.559888	chr8	97273943	97349223	+	ENSG00000156471.8	47.9354	58.166	47.1641	27.4437	31.9106	26.4571
HMGA1	-0.631959	1.0278e-100	1.31245e-99	None	233.015	377.725	0.616891	chr6	34204650	34214008	+	ENSG00000137309.15	367.956	390.552	374.668	234.472	241.838	222.737
ABCF2	-0.972839	1.5474e-100	1.97179e-99	None	9.06888	19.1344	0.473956	chr7	150904923	150924316	-	ENSG00000033050.3	18.8284	19.7483	18.8265	9.0292	9.05016	9.12728
KIAA0247	1.00329	1.64028e-100	2.08575e-99	Up	12.4146	6.52165	1.90359	chr14	70078313	70181859	+	ENSG00000100647.7	6.26379	6.40025	6.9009	12.6302	12.0853	12.5282
MBTPS1	0.784785	2.39429e-100	3.03814e-99	None	45.6338	28.4806	1.60228	chr16	84087368	84150511	-	ENSG00000140943.12	28.4907	27.8359	29.115	45.982	44.8172	46.1021
GAA	1.15696	2.93072e-100	3.71101e-99	Up	22.8044	11.3858	2.00288	chr17	78075355	78093678	+	ENSG00000171298.8	10.5638	11.6156	11.9779	23.6246	21.7881	23.0005
SERINC1	0.742875	3.14491e-100	3.9739e-99	None	38.9351	25.1392	1.54878	chr6	122764499	122792967	-	ENSG00000111897.6	25.6621	24.9375	24.8181	39.6125	39.8083	37.3847
GART	-0.842934	7.35933e-100	9.27983e-99	None	25.5161	48.2835	0.528464	chr21	34876238	34915797	-	ENSG00000159131.12	49.2679	49.1229	46.4597	25.9733	26.6333	23.9417
APLP2	0.61286	8.43319e-100	1.06118e-98	None	113.762	80.3414	1.41598	chr11	129939732	130014699	+	ENSG00000084234.12	81.1054	79.1095	80.8091	117.266	114.376	109.644
TRAP1	-0.745345	1.08696e-99	1.36491e-98	None	38.1453	68.9354	0.553349	chr16	3701640	3767598	-	ENSG00000126602.6	67.2376	70.1582	69.4103	38.5295	39.3068	36.5996
PSMD14	-0.802211	1.39707e-99	1.75069e-98	None	30.6869	58.3692	0.525737	chr2	162164549	162268228	+	ENSG00000115233.7	59.0125	59.2892	56.8059	31.2778	31.3267	29.4561
EFNA1	1.05472	2.49265e-99	3.1171e-98	Up	31.3806	15.3015	2.05081	chr1	155099936	155107333	+	ENSG00000169242.7	14.1387	17.1997	14.5662	34.6457	34.2713	25.2249
AIMP2	-1.32216	2.82312e-99	3.52307e-98	Down	10.0102	27.1622	0.368535	chr7	6048876	6063465	+	ENSG00000106305.5	28.1421	27.3831	25.9615	10.4796	9.99423	9.55688
SRXN1	-0.901543	2.9226e-99	3.6397e-98	None	14.5702	29.4133	0.495363	chr20	627259	634014	-	ENSG00000271303.1	30.173	29.357	28.7098	14.8525	15.1374	13.7208
SPRR3	0.926613	4.461e-99	5.54412e-98	None	85.2844	50.0766	1.70308	chr1	152974223	152976332	+	ENSG00000163209.10	47.2033	52.827	50.1994	80.4574	87.541	87.8547
ATXN10	0.74027	6.82605e-99	8.46598e-98	None	59.2584	37.1436	1.59539	chr22	46067678	46241187	+	ENSG00000130638.11	38.9211	37.7004	34.8094	59.5709	60.5023	57.7021
IDH3A	-0.961384	9.76439e-99	1.20854e-97	None	13.4985	28.3033	0.476925	chr15	78423840	78464291	+	ENSG00000166411.9	29.1086	27.0939	28.7073	13.9082	13.5841	13.0033
PES1	-0.767738	1.13446e-98	1.40125e-97	None	34.5451	61.8021	0.558962	chr22	30972612	31003070	-	ENSG00000100029.13	59.6679	63.5796	62.1589	34.8202	35.7558	33.0592
DHX9	-0.723801	1.28548e-98	1.58455e-97	None	61.0963	106.217	0.575203	chr1	182808504	182856886	+	ENSG00000135829.12	109.1	105.287	104.264	60.9632	64.4032	57.9223
SLC27A4	-1.09659	1.84891e-98	2.27442e-97	Down	10.4346	24.1266	0.432495	chr9	131102925	131123749	+	ENSG00000167114.8	23.4579	23.9311	24.991	10.5709	9.89278	10.8403
TNFRSF10D	-0.935923	1.91767e-98	2.35421e-97	None	8.39916	17.3637	0.483721	chr8	22993101	23021543	-	ENSG00000173530.5	17.7331	17.2904	17.0675	8.481	8.63464	8.08184
MCM3	-0.646054	2.19147e-98	2.68488e-97	None	59.8213	100.789	0.593529	chr6	52128807	52149679	-	ENSG00000112118.13	100.878	101.88	99.6102	61.2702	61.5439	56.6498
TIMM50	-0.822195	2.41419e-98	2.95176e-97	None	38.3085	80.1805	0.477779	chr19	39971052	39984422	+	ENSG00000105197.6	91.3959	78.9856	70.1599	40.3135	38.2779	36.3342
NOTCH1	1.02509	6.43553e-98	7.85265e-97	Up	11.4287	6.12094	1.86714	chr9	139388896	139440314	-	ENSG00000148400.9	5.86434	6.06862	6.42988	11.1445	11.2717	11.8699
ACOT11	1.14073	6.76031e-98	8.23231e-97	Up	13.0483	7.03129	1.85574	chr1	55007930	55104865	+	ENSG00000162390.13	6.84354	7.01373	7.2366	12.9194	13.2913	12.9341
SLC35E2B	0.965418	1.45227e-97	1.76493e-96	None	17.307	9.62928	1.79733	chr1	1592939	1624167	-	ENSG00000189339.7	9.71397	9.28023	9.89365	17.1198	17.3248	17.4764
TBC1D2B	0.881616	1.72202e-97	2.08855e-96	None	13.0202	7.56088	1.72205	chr15	78276378	78370066	-	ENSG00000167202.7	7.65732	7.5666	7.45871	12.9764	13.1692	12.915
UGDH	0.93354	2.10644e-97	2.54968e-96	None	16.565	9.60214	1.72513	chr4	39500375	39529931	-	ENSG00000109814.7	9.61624	9.70652	9.48366	17.086	16.798	15.8109
SLIT2	0.988885	2.44904e-97	2.95844e-96	None	13.3931	7.25378	1.84636	chr4	20254883	20622184	+	ENSG00000145147.15	7.41719	6.97342	7.37074	13.3379	13.1804	13.6609
COPS3	-0.754537	2.58799e-97	3.12005e-96	None	95.7457	169.219	0.565808	chr17	17150141	17184607	-	ENSG00000141030.8	172.448	171.073	164.137	95.6106	98.8894	92.7371
ARAP1	1.1046	3.92376e-97	4.72102e-96	Up	13.8313	6.9008	2.00431	chr11	72396114	72504644	-	ENSG00000186635.10	6.16429	7.00082	7.53729	13.9955	13.4218	14.0766
ATP2B4	0.656422	5.01625e-97	6.02348e-96	None	26.6802	18.4486	1.44619	chr1	203595689	203713209	+	ENSG00000058668.10	17.8719	18.6879	18.7862	26.6457	27.486	25.9089
DNAJB2	1.04268	5.85706e-97	7.01917e-96	Up	24.7508	13.8838	1.78271	chr2	220143989	220151622	+	ENSG00000135924.11	13.4101	12.9887	15.2527	28.4229	22.8326	22.9971
NUDT3	0.635194	6.57064e-97	7.85874e-96	None	20.5472	14.2925	1.43762	chr6	34247456	34360451	-	ENSG00000272325.1	14.3484	14.2012	14.3279	20.7545	21.1076	19.7795
CPD	0.727581	9.91509e-97	1.18354e-95	None	20.5497	13.3797	1.53589	chr17	28705923	28797007	+	ENSG00000108582.7	13.8578	12.86	13.4212	20.9967	20.8561	19.7964
BRIX1	-1.08066	1.13704e-96	1.35458e-95	Down	13.7462	32.2881	0.425736	chr5	34915481	34926101	+	ENSG00000113460.8	34.5605	31.8171	30.4867	13.7567	14.2246	13.2573
WDR36	-0.868165	1.47824e-96	1.7576e-95	None	11.0063	21.0098	0.523864	chr5	110427414	110466200	+	ENSG00000134987.7	22.2304	20.3901	20.4089	10.935	11.4343	10.6496
MRPL12	-1.07295	1.50474e-96	1.78559e-95	Down	20.2983	46.136	0.439967	chr17	79670387	79674556	+	ENSG00000262814.2	45.2612	46.0218	47.1249	21.4807	20.605	18.8092
SLC4A7	-1.06271	2.07748e-96	2.46038e-95	Down	5.55446	12.28	0.452317	chr3	27414214	27525911	-	ENSG00000033867.12	12.776	11.7285	12.3355	5.66847	5.54851	5.44641
ACSF2	1.02111	2.73053e-96	3.22748e-95	Up	37.6107	21.5678	1.74384	chr17	48503519	48552206	+	ENSG00000167107.8	20.2488	21.8173	22.6372	38.4178	36.2314	38.1829
GALNT10	-0.880057	2.9689e-96	3.49555e-95	None	6.89115	13.7747	0.500275	chr5	153570290	153800544	+	ENSG00000164574.11	13.6117	13.3878	14.3246	6.76018	7.35753	6.55573
ARMC6	-1.1295	2.96783e-96	3.49555e-95	Down	6.91994	16.0765	0.430438	chr19	19144384	19170563	+	ENSG00000105676.9	15.5941	16.5083	16.1271	6.79686	7.06555	6.89741
BYSL	-1.31185	4.38148e-96	5.14866e-95	Down	5.60799	14.8439	0.377798	chr6	41888926	41900784	+	ENSG00000112578.5	14.7019	14.8744	14.9554	5.58696	5.58377	5.65324
GPATCH4	-1.3757	7.73619e-96	9.07313e-95	Down	4.73649	13.2242	0.358168	chr1	156564279	156571288	-	ENSG00000160818.12	13.5188	13.3126	12.8413	4.59065	4.87682	4.742
EIF6	-0.734463	1.26237e-95	1.47766e-94	None	87.5961	165.611	0.528926	chr20	33866714	33872788	-	ENSG00000242372.2	160.018	169.89	166.926	86.3945	91.8897	84.5042
IFRD2	-1.45286	2.0058e-95	2.34334e-94	Down	6.60278	20.4766	0.322455	chr3	50325163	50330349	-	ENSG00000214706.6	19.0078	22.3786	20.0434	7.27145	6.58572	5.95118
STRAP	-0.835981	2.1411e-95	2.49657e-94	None	52.7155	101.889	0.517381	chr12	16035325	16056412	+	ENSG00000023734.6	103.695	102.282	99.6903	54.4709	55.3376	48.3381
SLC12A2	0.761869	2.19149e-95	2.5504e-94	None	21.3802	13.2542	1.61309	chr5	127419458	127525380	+	ENSG00000064651.9	13.2207	12.9142	13.6276	22.4545	21.3212	20.3649
NOL11	-0.882847	2.33211e-95	2.70884e-94	None	22.9957	45.844	0.501608	chr17	65713949	65740647	+	ENSG00000130935.5	46.0516	47.8725	43.6078	23.7849	23.8753	21.327
SPOCK1	-0.639295	2.81155e-95	3.25946e-94	None	41.8071	77.8626	0.536934	chr5	136310987	136934068	-	ENSG00000152377.8	77.0147	79.2483	77.3247	40.4432	40.135	44.843
ITPKC	1.16289	3.04166e-95	3.51946e-94	Up	12.3683	5.97273	2.0708	chr19	41223008	41246765	+	ENSG00000086544.2	5.57924	5.98619	6.35276	12.8821	12.2717	11.9512
ARHGAP23	1.02426	4.05435e-95	4.68228e-94	Up	24.0151	13.4781	1.78179	chr17	36584662	36668628	+	ENSG00000225485.3	14.2432	12.3924	13.7985	25.409	23.1477	23.4885
FRK	0.858637	4.18295e-95	4.82157e-94	None	10.3094	6.11529	1.68584	chr6	116252312	116381921	-	ENSG00000111816.6	6.1392	5.79871	6.40796	10.2753	10.5576	10.0953
XPOT	-0.749185	5.25814e-95	6.04937e-94	None	23.4962	41.7253	0.563117	chr12	64798130	64844907	+	ENSG00000184575.7	43.488	40.7105	40.9774	23.6266	24.3835	22.4786
FAM134C	0.891546	6.45545e-95	7.41272e-94	None	26.9391	15.1018	1.78383	chr17	40731531	40762641	-	ENSG00000141699.6	14.9973	15.021	15.2871	26.4819	27.1507	27.1846
RUVBL2	-0.78586	7.97841e-95	9.14414e-94	None	46.4069	84.3215	0.550357	chr19	49496705	49519252	+	ENSG00000183207.8	80.0994	84.9231	87.9419	46.352	47.454	45.4148
GNS	0.725563	1.95086e-94	2.23167e-93	None	32.3545	20.7877	1.55643	chr12	65107225	65153227	-	ENSG00000135677.6	19.7093	21.9895	20.6642	33.6593	31.393	32.0112
DGKA	0.890499	1.96122e-94	2.23927e-93	None	34.1013	21.8584	1.5601	chr12	56321103	56347811	+	ENSG00000065357.15	22.2946	22.6228	20.6577	36.1122	36.1421	30.0495
LARP1	-0.654066	2.12868e-94	2.4259e-93	None	48.367	80.4845	0.600948	chr5	154092462	154197167	+	ENSG00000155506.12	78.5216	81.1721	81.7599	48.5173	47.9637	48.6201
FGFBP1	-1.10947	2.14047e-94	2.43473e-93	Down	26.3764	61.6358	0.427939	chr4	15937192	15940363	-	ENSG00000137440.3	62.2213	61.0344	61.6517	28.5609	27.5782	22.99
RCC1	-0.784536	2.18731e-94	2.48334e-93	None	27.1189	47.74	0.568056	chr1	28832455	28865812	+	ENSG00000180198.11	47.668	46.8945	48.6573	27.4997	28.9019	24.9552
LYPD3	0.788383	2.54566e-94	2.88477e-93	None	60.6141	37.886	1.59991	chr19	43964939	43969812	-	ENSG00000124466.8	37.1052	37.4804	39.0724	62.587	61.6672	57.5881
PRDX1	-0.590698	3.75828e-94	4.25094e-93	None	380.068	612.152	0.620871	chr1	45976708	45988719	-	ENSG00000117450.9	606.527	621.492	608.438	393.37	377.489	369.345
CTSB	0.777106	5.06428e-94	5.70676e-93	None	71.3837	45.4162	1.57177	chr8	11700033	11726957	-	ENSG00000164733.16	49.1796	51.426	35.643	94.8203	61.9292	57.4017
DUSP4	-0.675898	5.05959e-94	5.70676e-93	None	25.4765	43.6984	0.583008	chr8	29190581	29208185	-	ENSG00000120875.4	43.5198	43.5558	44.0195	25.1962	26.7133	24.52
PSMD2	-0.557455	5.66012e-94	6.36631e-93	None	111.136	175.301	0.633973	chr3	184016497	184026842	+	ENSG00000175166.12	174.247	176.393	175.263	112.563	112.339	108.506
GTPBP4	-0.969729	6.6188e-94	7.43077e-93	None	9.58185	19.5565	0.489958	chr10	1034338	1065876	+	ENSG00000107937.14	20.0799	19.833	18.7566	9.9156	10.0965	8.73344
NOP16	-1.4801	8.02344e-94	8.99101e-93	Down	7.43838	22.085	0.336807	chr5	175810949	175815976	-	ENSG00000048162.15	22.4807	22.7027	21.0716	7.12071	7.48344	7.711
PRPF19	-0.749973	1.46238e-93	1.6357e-92	None	40.7009	73.6879	0.552341	chr11	60658202	60674060	-	ENSG00000110107.4	71.5398	74.634	74.89	42.4581	40.331	39.3135
YARS	-0.709479	2.13692e-93	2.38577e-92	None	40.0696	68.6325	0.583829	chr1	33240840	33283754	-	ENSG00000134684.6	69.7251	69.0873	67.085	40.4086	41.8871	37.9131
ULK1	1.16963	2.59516e-93	2.89202e-92	Up	13.2236	6.22845	2.12309	chr12	132379196	132407712	+	ENSG00000177169.5	6.08217	6.28352	6.31967	12.5422	13.0142	14.1143
WDR5	-0.764471	3.27965e-93	3.64808e-92	None	26.2808	48.02	0.547288	chr9	137000487	137025093	+	ENSG00000196363.5	46.6831	48.4534	48.9235	27.6365	26.2241	24.9817
PHF21A	1.28134	4.33965e-93	4.81829e-92	Up	12.6258	6.36169	1.98465	chr11	45950871	46142985	-	ENSG00000135365.11	7.07872	5.80697	6.19939	12.5078	11.2633	14.1062
MYO6	0.723072	4.43085e-93	4.91052e-92	None	20.2459	13.6946	1.47838	chr6	76458909	76629254	+	ENSG00000196586.9	13.7114	13.8078	13.5646	19.7857	21.0411	19.9109
VPS13D	0.799715	7.61261e-93	8.42128e-92	None	22.3806	13.7518	1.62746	chr1	12290124	12572099	+	ENSG00000048707.9	13.7253	13.6096	13.9205	22.8646	20.9663	23.3108
PTPN11	-0.664629	7.99376e-93	8.82674e-92	None	28.1213	47.8671	0.587487	chr12	112856155	112947717	+	ENSG00000179295.11	49.5795	46.3341	47.6878	28.5107	28.6032	27.2501
RXRA	0.967023	9.1703e-93	1.01074e-91	None	51.7621	28.5559	1.81266	chr9	137208944	137332431	+	ENSG00000186350.8	26.2472	29.0733	30.3473	51.5347	51.05	52.7017
RHOB	-0.767882	1.41561e-92	1.55743e-91	None	47.4939	87.4031	0.543389	chr2	20646835	20649200	+	ENSG00000143878.8	85.0459	86.3631	90.8004	47.8524	47.1191	47.5103
HSPG2	1.02568	1.42421e-92	1.56404e-91	Up	22.8257	12.415	1.83857	chr1	22148738	22263790	-	ENSG00000142798.12	11.67	12.4079	13.167	22.4109	22.1418	23.9246
PPP1R13L	0.978209	3.31413e-92	3.63291e-91	None	29.0823	15.9972	1.81796	chr19	45882892	45909607	-	ENSG00000104881.10	15.6549	16.5036	15.8331	29.0268	29.117	29.1031
PRMT5	-0.817622	3.75202e-92	4.10547e-91	None	23.9765	47.4154	0.50567	chr14	23389720	23398794	-	ENSG00000100462.11	48.1018	47.4124	46.7319	24.9856	24.7608	22.1832
RRP9	-1.34868	4.50301e-92	4.9183e-91	Down	5.75377	15.8348	0.363363	chr3	51967446	51975957	-	ENSG00000114767.6	15.6364	16.0486	15.8194	5.54269	5.99051	5.72812
LGALS8	1.02522	4.60073e-92	5.01596e-91	Up	13.8654	6.50421	2.13175	chr1	236681300	236716281	+	ENSG00000116977.14	7.0269	6.47172	6.01401	13.1193	15.4078	13.069
JAK1	0.613144	5.55977e-92	6.05063e-91	None	58.1121	40.4665	1.43605	chr1	65298912	65432187	-	ENSG00000162434.7	41.1858	40.1755	40.0382	58.8537	59.3054	56.1772
INPP4B	0.775363	9.77309e-92	1.06168e-90	None	23.5862	13.558	1.73965	chr4	142944313	143768585	-	ENSG00000109452.8	13.4621	13.1334	14.0786	22.9734	23.5205	24.2648
PFKP	-0.675379	1.18413e-91	1.28404e-90	None	41.7855	71.4554	0.584777	chr10	3108525	3179904	+	ENSG00000067057.12	70.3464	73.1567	70.8631	41.6087	43.0347	40.7131
LDHA	-0.825521	2.58011e-91	2.79281e-90	None	340.673	655.992	0.519325	chr11	18415935	18429972	+	ENSG00000134333.9	680.486	629.439	658.051	354.892	346.46	320.668
SLC39A14	-0.823474	2.7952e-91	3.02021e-90	None	14.8633	27.3792	0.542867	chr8	22224762	22291642	+	ENSG00000104635.9	27.7614	27.1757	27.2005	14.8787	14.1688	15.5424
ZKSCAN1	0.690477	3.07657e-91	3.3183e-90	None	17.3133	11.6734	1.48314	chr7	99613204	99639312	+	ENSG00000106261.12	11.5427	11.7964	11.681	17.5191	17.1507	17.2699
RPL13A	0.602654	5.25162e-91	5.65415e-90	None	1309.38	988.451	1.32468	chr19	49990811	49995565	+	ENSG00000142541.12	1094.99	939.671	930.696	1324.52	1360.18	1243.45
TBC1D4	-0.906038	6.96294e-91	7.48331e-90	None	4.99526	10.0572	0.496684	chr13	75858808	76056250	-	ENSG00000136111.8	10.2419	10.1032	9.82653	4.93077	5.16567	4.88934
BRWD3	0.684557	8.06831e-91	8.65588e-90	None	13.7838	8.87403	1.55328	chrX	79926353	80065187	-	ENSG00000165288.10	8.81044	8.87505	8.9366	13.657	13.7939	13.9005
TOB1	0.756462	9.22202e-91	9.87607e-90	None	41.4422	25.3251	1.63641	chr17	48939584	48945339	-	ENSG00000141232.4	24.5624	24.9642	26.4487	46.8016	39.5952	37.9297
IFITM3	1.20808	1.71845e-90	1.83707e-89	Up	92.8162	43.3917	2.13903	chr11	319669	327537	-	ENSG00000142089.11	39.6128	46.0071	44.5551	88.2474	92.6939	97.5072
MTHFD2	-0.715048	5.92392e-90	6.32164e-89	None	28.9554	51.7304	0.559738	chr2	74425689	74444692	+	ENSG00000065911.7	48.6331	48.4744	58.0837	28.1787	29.225	29.4625
EFTUD2	-0.60905	8.06532e-90	8.59162e-89	None	38.4542	63.3135	0.607362	chr17	42927311	42977030	-	ENSG00000108883.8	62.9488	65.212	61.7798	38.6137	40.0741	36.6748
FNBP1L	0.775773	8.24822e-90	8.77099e-89	None	20.9923	13.2731	1.58157	chr1	93913688	94020218	+	ENSG00000137942.12	13.6569	12.8972	13.2651	20.4979	21.8833	20.5955
MYO5B	0.777329	1.07992e-89	1.14635e-88	None	10.2477	8.34809	1.22755	chr18	47349183	47721463	-	ENSG00000167306.14	8.13038	8.84777	8.06611	10.3495	10.3049	10.0887
MRPL3	-0.931145	1.84828e-89	1.95853e-88	None	35.6385	77.89	0.457549	chr3	131181056	131221827	-	ENSG00000114686.4	85.391	73.5778	74.7011	36.8441	37.6531	32.4183
CIRH1A	-1.08017	1.92276e-89	2.03389e-88	Down	16.2026	36.7115	0.441349	chr16	69165194	69265033	+	ENSG00000141076.13	39.8877	35.1667	35.08	16.0068	17.7841	14.8169
ANXA1	0.818622	2.1944e-89	2.31716e-88	None	210.192	131.377	1.59991	chr9	75766673	75785309	+	ENSG00000135046.9	134.773	128.001	131.357	225.782	215.284	189.509
KIAA0319L	1.00615	2.37707e-89	2.50568e-88	Up	39.7827	21.4625	1.85359	chr1	35899091	36023551	-	ENSG00000142687.13	20.8493	22.3939	21.1443	41.1428	38.8246	39.3807
USP1	-0.697743	3.38398e-89	3.56084e-88	None	24.6283	43.1347	0.570963	chr1	62901968	62917475	+	ENSG00000162607.8	44.307	42.0427	43.0545	25.6616	25.4272	22.7962
FOSL2	-0.672463	6.63597e-89	6.97065e-88	None	23.076	39.0203	0.591384	chr2	28615315	28640179	+	ENSG00000075426.7	38.3477	38.5346	40.1786	22.9154	23.7834	22.529
RIPK4	0.914994	6.65496e-89	6.97846e-88	None	17.6067	10.0852	1.7458	chr21	43159529	43187266	-	ENSG00000183421.7	9.669	10.0878	10.4986	17.7976	17.4232	17.5993
TEAD3	0.88747	1.33116e-88	1.39345e-87	None	21.02	12.1884	1.72459	chr6	35441374	35464853	-	ENSG00000007866.14	11.6228	12.5264	12.416	20.9967	21.2389	20.8246
KIRREL	-0.785614	1.67847e-88	1.75094e-87	None	9.64262	17.758	0.543003	chr1	157963063	158070052	+	ENSG00000183853.13	17.2089	17.987	18.078	9.43426	9.96038	9.53321
R3HDM2	0.796599	1.67709e-88	1.75094e-87	None	18.4399	11.6387	1.58436	chr12	57643392	57824788	-	ENSG00000179912.15	11.5057	11.7837	11.6267	18.7197	18.543	18.0572
SOS2	0.844422	1.82475e-88	1.90026e-87	None	12.564	7.53881	1.66657	chr14	50583847	50698276	-	ENSG00000100485.7	7.49139	7.5902	7.53484	12.577	12.824	12.2909
AGPAT5	-0.827988	2.89887e-88	3.01363e-87	None	15.452	28.1581	0.54876	chr8	6565878	6617184	+	ENSG00000155189.7	29.2823	28.1225	27.0695	15.9905	15.5551	14.8105
MCM6	-0.736101	2.99064e-88	3.10369e-87	None	19.6284	34.8989	0.562435	chr2	136597196	136633996	-	ENSG00000076003.4	35.4472	34.5228	34.7267	20.4619	20.0133	18.4098
HIST1H2AH	-0.79188	3.16847e-88	3.2826e-87	None	140.209	262.37	0.534394	chr6	27114861	27115317	+	ENSG00000184825.4	256.121	265.741	265.247	137.806	140.92	141.901
RIOK3	0.826348	4.35811e-88	4.50736e-87	None	22.3761	14.3507	1.55923	chr18	21032787	21066567	+	ENSG00000101782.10	13.7325	15.5332	13.7865	23.009	22.9043	21.2149
SYTL2	1.0988	4.63245e-88	4.7829e-87	Up	14.8989	6.85434	2.17365	chr11	85405267	85522184	-	ENSG00000137501.12	6.68384	6.77431	7.10488	13.6372	15.0565	16.0031
SLC25A32	-1.21742	5.19422e-88	5.35377e-87	Down	5.24231	13.4831	0.388805	chr8	104410863	104427417	-	ENSG00000164933.7	14.8404	13.0588	12.5501	5.72906	5.19475	4.80312
OSBPL9	0.579825	5.30145e-88	5.45499e-87	None	118.724	84.8799	1.39872	chr1	52042851	52254889	+	ENSG00000117859.14	85.8251	83.8457	84.9689	120.047	117.81	118.313
CDK2AP1	-0.927857	5.65927e-88	5.81327e-87	None	17.9775	36.4263	0.493531	chr12	123745528	123756881	-	ENSG00000111328.2	37.3518	36.0568	35.8702	18.3789	19.2313	16.3224
MCM7	-0.6706	9.00335e-88	9.23264e-87	None	44.9309	75.8913	0.592043	chr7	99690351	99699563	-	ENSG00000166508.13	73.3661	77.2498	77.0578	44.6406	45.6687	44.4833
PTCH1	0.865975	1.05695e-87	1.08203e-86	None	11.4529	6.7066	1.70771	chr9	98205262	98279339	-	ENSG00000185920.11	6.5808	6.7416	6.79739	11.5023	11.4008	11.4557
MGEA5	0.679263	1.12541e-87	1.15016e-86	None	47.1764	31.3372	1.50544	chr10	103544200	103578696	-	ENSG00000198408.9	32.6643	30.9009	30.4465	46.9052	47.01	47.614
PLD2	1.05803	1.32904e-87	1.35598e-86	Up	21.4922	11.0632	1.94267	chr17	4710391	4726729	+	ENSG00000129219.9	10.4779	11.3155	11.3963	21.0406	21.0481	22.3879
PHF15	-0.764807	1.66092e-87	1.69173e-86	None	44.7298	78.1566	0.57231	chr5	133860003	133918918	+	ENSG00000043143.16	74.7194	79.8189	79.9315	44.0734	44.2141	45.9018
TMEM63A	0.863635	1.68664e-87	1.71504e-86	None	35.4751	20.6778	1.71561	chr1	226033237	226070069	-	ENSG00000196187.7	20.0483	20.6811	21.3041	35.3903	34.6391	36.3959
BCL6	1.37977	1.94758e-87	1.97704e-86	Up	10.3691	4.2709	2.42785	chr3	187439165	187463515	-	ENSG00000113916.13	3.98692	4.27965	4.54612	10.8111	9.85516	10.441
WDR26	0.611943	2.24985e-87	2.28005e-86	None	51.2094	46.2061	1.10828	chr1	224572845	224624735	-	ENSG00000162923.10	43.1891	52.4517	42.9774	61.2676	48.8607	43.4998
TNC	0.645886	2.33115e-87	2.35849e-86	None	26.5568	19.2895	1.37675	chr9	117782806	117880536	-	ENSG00000041982.10	19.0738	18.7335	20.0611	26.3031	27.4699	25.8975
UCHL3	-1.67378	2.4597e-87	2.48438e-86	Down	8.59922	29.9964	0.286675	chr13	76123619	76180085	+	ENSG00000118939.13	30.2559	29.7735	29.9597	9.13647	7.37993	9.28126
SET	-0.697313	3.12977e-87	3.1559e-86	None	222.899	373.581	0.596655	chr9	131445703	131458679	+	ENSG00000119335.12	367.034	368.106	385.602	232.551	233.018	203.127
FAM63B	0.793406	5.5885e-87	5.62576e-86	None	12.495	8.3809	1.49089	chr15	59063391	59154099	+	ENSG00000128923.6	8.98272	8.33704	7.82293	12.7375	11.8253	12.9222
PHF19	-0.706187	6.0512e-87	6.08141e-86	None	22.5403	41.1282	0.548051	chr9	123617977	123639606	-	ENSG00000119403.9	39.5853	41.1951	42.6042	22.0411	22.7245	22.8554
JMJD1C	0.675901	1.05463e-86	1.05813e-85	None	24.5537	16.0986	1.5252	chr10	64926981	65225722	-	ENSG00000171988.13	16.288	15.827	16.1809	24.2119	25.2813	24.168
CALCOCO2	0.854976	1.08586e-86	1.08766e-85	None	22.9803	12.9788	1.7706	chr17	46908350	46943884	+	ENSG00000136436.10	12.9564	12.5372	13.4429	23.0453	23.0918	22.8037
PSMD12	-0.785753	1.45427e-86	1.45427e-85	None	23.5767	41.7252	0.565047	chr17	65334032	65362743	-	ENSG00000197170.5	43.2738	40.3566	41.5453	23.8818	23.5738	23.2744
CCNI	0.601646	1.47966e-86	1.47721e-85	None	100.735	71.6945	1.40506	chr4	77968311	77997158	-	ENSG00000118816.5	72.7981	70.9202	71.3653	100.637	101.79	99.7777
RABGAP1L	0.850324	3.0231e-86	3.01312e-85	None	17.5343	10.7535	1.63057	chr1	174128548	174964445	+	ENSG00000152061.17	11.5224	10.4771	10.261	17.0533	18.5556	16.9941
DCAF6	0.79366	3.16953e-86	3.15387e-85	None	27.8158	17.1683	1.62019	chr1	167905021	168045081	+	ENSG00000143164.11	16.4383	17.6379	17.4285	27.4546	27.2389	28.7537
FAM208B	-0.859532	3.76225e-86	3.7375e-85	None	13.2467	24.5997	0.53849	chr10	5726801	5805703	+	ENSG00000108021.15	25.4445	23.4181	24.9365	12.826	12.9249	13.9891
BTG1	0.812667	5.71849e-86	5.67154e-85	None	32.3654	19.9375	1.62334	chr12	92536286	92539673	-	ENSG00000133639.3	20.5841	19.5861	19.6423	33.515	32.632	30.9491
GRPEL1	-1.17784	1.06274e-85	1.05229e-84	Down	5.6985	14.6034	0.390217	chr4	7060633	7069924	-	ENSG00000109519.8	16.4529	13.9372	13.4202	5.47661	5.1799	6.43899
KPNA2	-0.671115	1.27129e-85	1.25673e-84	None	86.5267	149.662	0.578148	chr17	66031635	66042958	+	ENSG00000182481.4	152.299	149.563	147.123	84.3638	89.3665	85.8498
TTLL12	-0.881389	1.59471e-85	1.57386e-84	None	10.1393	20.0022	0.506907	chr22	43562628	43583139	-	ENSG00000100304.12	19.3944	20.298	20.3143	10.0282	10.414	9.97555
UTRN	0.649271	1.67807e-85	1.65343e-84	None	18.0803	12.501	1.4463	chr6	144606837	145174170	+	ENSG00000152818.14	12.5832	12.1771	12.7428	17.69	18.6171	17.9337
TRAPPC6A	1.97989	1.92933e-85	1.89791e-84	Up	13.3328	3.51134	3.79708	chr19	45666186	45681495	-	ENSG00000007255.6	3.46989	3.48346	3.58066	12.9108	13.7201	13.3675
ZNF160	1.03398	2.46895e-85	2.42479e-84	Up	15.6772	7.80926	2.00752	chr19	53569859	53606689	-	ENSG00000170949.13	7.61503	7.99428	7.81846	15.652	14.8599	16.5199
QARS	0.680907	3.93346e-85	3.85683e-84	None	53.1452	35.0282	1.51721	chr3	49133365	49142553	-	ENSG00000172053.10	33.6441	37.5483	33.8923	55.2366	52.7307	51.4682
GSTK1	0.992453	5.00474e-85	4.89929e-84	None	34.5621	18.3642	1.88204	chr7	142941186	142967947	+	ENSG00000197448.9	17.5652	18.5324	18.9948	35.1597	35.4936	33.0329
PSG5	0.933899	1.05533e-84	1.03142e-83	None	36.6534	21.5407	1.70159	chr19	43670408	43690688	-	ENSG00000204941.9	22.7882	21.803	20.0307	36.8889	37.9169	35.1544
BBS2	0.995401	1.05965e-84	1.03397e-83	None	18.7827	8.61928	2.17914	chr16	56500748	56554195	-	ENSG00000125124.7	8.27645	8.68145	8.89993	20.9394	17.5249	17.8836
PERP	0.780598	1.06364e-84	1.03619e-83	None	73.8158	46.3921	1.59113	chr6	138409642	138428648	-	ENSG00000112378.11	47.7747	44.3322	47.0693	77.7598	75.6873	68.0003
HPCAL1	-1.12297	1.30072e-84	1.26511e-83	Down	8.39131	19.996	0.419649	chr2	10443015	10567743	+	ENSG00000115756.8	20.1387	20.6474	19.202	8.64824	8.11772	8.40797
SP140L	1.06033	1.47499e-84	1.4323e-83	Up	16.9288	8.3602	2.02492	chr2	231191899	231268447	+	ENSG00000185404.12	7.89828	8.70204	8.48029	16.5661	17.8196	16.4005
NUP155	-0.61588	1.90931e-84	1.85108e-83	None	32.6795	53.4119	0.611839	chr5	37288239	37371283	-	ENSG00000113569.11	55.4499	52.4426	52.3431	33.4012	33.6095	31.0277
CDC45	-0.959249	2.48246e-84	2.4029e-83	None	13.2211	27.3189	0.483955	chr22	19466982	19508135	+	ENSG00000093009.5	26.7669	27.4497	27.74	13.4202	13.8888	12.3544
ABCA5	1.17026	2.94751e-84	2.84847e-83	Up	14.1274	6.98498	2.02255	chr17	67240452	67323385	-	ENSG00000154265.11	7.22123	6.7591	6.97461	13.6597	13.4428	15.2798
FBL	-0.601222	4.05076e-84	3.9084e-83	None	109.38	183.427	0.596314	chr19	40325098	40337054	-	ENSG00000105202.3	185.61	183.952	180.719	111.978	111.878	104.284
PPM1G	-0.699476	6.15136e-84	5.92572e-83	None	38.8725	68.3566	0.568672	chr2	27604061	27632554	-	ENSG00000115241.9	67.2032	68.4631	69.4035	40.4435	38.9468	37.2272
RAB15	1.18525	8.89146e-84	8.55166e-83	Up	11.6067	5.44872	2.13016	chr14	65412532	65439494	-	ENSG00000139998.10	5.20866	5.27385	5.86366	11.2679	12.3145	11.2376
UFM1	0.91339	1.21001e-83	1.16191e-82	None	38.6505	22.0917	1.74955	chr13	38923986	38937140	+	ENSG00000120686.7	21.663	21.8908	22.7212	40.1563	38.8238	36.9714
NAA25	-0.828941	1.25062e-83	1.19901e-82	None	11.9919	21.9169	0.547153	chr12	112464500	112546826	-	ENSG00000111300.5	22.5231	21.5058	21.7219	11.8616	12.6589	11.4553
HK2	-0.729423	1.26102e-83	1.20707e-82	None	9.05081	16.1237	0.561336	chr2	75061108	75120486	+	ENSG00000159399.5	16.309	15.8461	16.2159	9.28379	9.08688	8.78176
PTGES3	-0.601162	1.34077e-83	1.28137e-82	None	167.345	279.091	0.599608	chr12	57057127	57082159	-	ENSG00000110958.11	292.64	282.914	261.72	174.479	165.856	161.7
USP25	0.770551	1.71819e-83	1.63947e-82	None	32.283	20.0395	1.61097	chr21	17102344	17252377	+	ENSG00000155313.11	20.7805	19.9276	19.4105	31.2115	33.5934	32.0441
GABARAP	0.708283	1.90042e-83	1.8105e-82	None	91.0562	64.5861	1.40984	chr17	7143333	7146089	-	ENSG00000170296.5	62.4814	66.7969	64.48	91.722	89.8115	91.6352
LSG1	-0.75525	2.29239e-83	2.18048e-82	None	18.3843	31.6626	0.580631	chr3	194361517	194393206	-	ENSG00000041802.6	31.6814	32.0564	31.2499	18.4024	18.4269	18.3235
NADSYN1	0.691397	2.66456e-83	2.5305e-82	None	101.617	69.6787	1.45837	chr11	71164155	71235153	+	ENSG00000172890.7	68.036	70.0388	70.9615	102.332	104.397	98.1228
SH3YL1	0.703674	3.05765e-83	2.89925e-82	None	64.9638	42.6382	1.52361	chr2	217730	266398	-	ENSG00000035115.17	41.2427	42.1772	44.4948	64.0241	66.6235	64.2438
CD55	0.982251	3.51784e-83	3.33037e-82	None	23.6868	12.2045	1.94083	chr1	207494853	207534311	+	ENSG00000196352.9	12.5224	12.7907	11.3005	23.7564	24.9831	22.321
SGK1	-0.613138	3.60712e-83	3.40954e-82	None	38.9746	67.4091	0.578181	chr6	134490384	134639250	-	ENSG00000118515.7	66.8608	68.2306	67.1358	38.6537	40.5674	37.7029
CD9	0.863053	9.25388e-83	8.73335e-82	None	148.199	87.9696	1.68466	chr12	6308881	6347425	+	ENSG00000010278.7	87.7603	88.7173	87.4313	158.57	152.928	133.098
PFAS	-0.905206	1.43195e-82	1.34929e-81	None	6.55335	12.885	0.508603	chr17	8150936	8173809	+	ENSG00000178921.9	12.3832	13.1506	13.1212	6.75124	6.37546	6.53336
ERAP1	0.844781	1.5161e-82	1.42636e-81	None	13.7476	7.89946	1.74032	chr5	96096521	96143803	-	ENSG00000164307.8	8.03951	7.786	7.87286	13.9491	13.7622	13.5315
ILF2	-0.688163	1.54226e-82	1.44871e-81	None	150.643	261.768	0.575481	chr1	153634512	153643524	-	ENSG00000143621.12	265.486	260.97	258.848	156.283	157.586	138.059
EZH1	0.92014	2.23477e-82	2.09597e-81	None	14.1639	7.877	1.79813	chr17	40852293	40897071	-	ENSG00000108799.8	7.79611	7.99673	7.83816	14.4046	12.9607	15.1263
CCND1	-0.528404	2.7014e-82	2.52968e-81	None	64.967	101.115	0.642505	chr11	69455855	69469242	+	ENSG00000110092.3	100.545	101.08	101.72	66.1797	65.8786	62.8427
IGBP1	0.972375	3.17411e-82	2.96774e-81	None	23.7197	12.9567	1.83069	chrX	69353299	69386174	+	ENSG00000089289.11	12.9039	12.5949	13.3713	24.8312	24.063	22.2648
NAT10	-0.740324	3.73086e-82	3.4829e-81	None	15.6324	27.9706	0.558885	chr11	34127149	34169217	+	ENSG00000135372.4	28.5494	27.6068	27.7557	15.554	16.2419	15.1012
SOGA2	-1.00416	4.60845e-82	4.29553e-81	Down	9.2258	19.0568	0.48412	chr18	8705659	8832776	+	ENSG00000168502.13	19.0154	19.7436	18.4115	9.9889	8.58931	9.09919
CNNM4	0.88313	5.31707e-82	4.9484e-81	None	10.7295	6.29584	1.70422	chr2	97426639	97477628	+	ENSG00000158158.7	6.2927	6.23796	6.35686	10.5323	11.01	10.6462
TRIOBP	0.887744	5.55614e-82	5.16294e-81	None	14.2936	8.88907	1.608	chr22	38093011	38172563	+	ENSG00000100106.15	8.96077	8.88828	8.81816	14.9445	13.7378	14.1987
EXO1	-0.877791	7.3016e-82	6.77445e-81	None	10.6306	20.9532	0.507349	chr1	242011269	242058450	+	ENSG00000174371.12	21.3834	21.4158	20.0605	10.2545	11.2253	10.4119
HIST1H2AJ	-0.880053	7.72312e-82	7.15455e-81	None	93.2756	185.57	0.502644	chr6	27782112	27782607	-	ENSG00000182611.3	183.044	196.118	177.547	91.4005	96.1608	92.2656
MTMR3	0.709255	9.19691e-82	8.50679e-81	None	21.6161	14.3451	1.50687	chr22	30279144	30426855	+	ENSG00000100330.11	13.8199	14.3259	14.8894	21.7324	20.6144	22.5015
AMOTL2	0.652101	9.90251e-82	9.14544e-81	None	82.9918	55.8563	1.48581	chr3	134074716	134094321	-	ENSG00000114019.10	52.2365	56.5482	58.7843	85.5154	85.3718	78.0883
CHD2	0.654879	1.02226e-81	9.42662e-81	None	27.6973	18.1959	1.52217	chr15	93426526	93571237	+	ENSG00000173575.14	17.8132	18.1319	18.6427	27.2146	27.6395	28.2378
AURKA	-0.708099	1.04492e-81	9.62095e-81	None	33.101	56.0499	0.590563	chr20	54944445	54967393	-	ENSG00000087586.13	55.594	58.2643	54.2914	34.1909	33.9355	31.1766
UTP15	-1.10547	1.82338e-81	1.67629e-80	Down	5.73684	11.7759	0.487169	chr5	72861268	72877794	+	ENSG00000164338.5	12.2073	11.9865	11.1338	6.51507	5.66563	5.02983
HIST1H2BO	-0.625261	1.99787e-81	1.83391e-80	None	313.381	522.447	0.599832	chr6	27861203	27861669	+	ENSG00000196331.5	514.983	529.29	523.068	317.836	310.946	311.36
KIFAP3	1.01964	2.42643e-81	2.22392e-80	Up	12.3641	6.60209	1.87275	chr1	169890467	170054349	-	ENSG00000075945.8	6.64196	6.3304	6.83392	12.6721	12.7328	11.6874
POLR1A	-0.670141	2.77212e-81	2.53691e-80	None	12.2301	20.7589	0.589147	chr2	86247339	86333278	-	ENSG00000068654.11	20.8801	20.5636	20.8331	11.8255	12.3923	12.4724
RAN	-0.648411	3.31504e-81	3.02917e-80	None	128.435	215.252	0.596672	chr12	131356424	131362223	+	ENSG00000132341.7	223.79	217.254	204.711	126.168	141.301	117.835
UCK2	-0.839542	7.58073e-81	6.91656e-80	None	16.1933	33.794	0.479178	chr1	165796768	165880855	+	ENSG00000143179.8	33.7016	34.0851	33.5952	16.091	17.1856	15.3033
PCNA	-0.829635	7.61359e-81	6.93606e-80	None	82.3109	158.001	0.520952	chr20	5095599	5107272	-	ENSG00000132646.6	160.733	157.716	155.553	89.1041	83.5347	74.2939
IMP4	-0.99609	8.59805e-81	7.82111e-80	None	14.0223	26.5982	0.527191	chr2	131099798	131105383	+	ENSG00000136718.5	25.7736	27.7672	26.2537	14.1641	15.7862	12.1166
ST14	0.685596	8.74349e-81	7.94146e-80	None	38.5216	25.8925	1.48775	chr11	130029457	130080271	+	ENSG00000149418.6	25.0761	26.6316	25.9697	38.4293	39.869	37.2666
CTNND1	0.53183	1.18997e-80	1.07919e-79	None	124.947	90.7743	1.37646	chr11	57520715	57587018	+	ENSG00000198561.8	88.7081	91.7567	91.8581	124.742	125.767	124.333
PKM	-0.511453	1.78254e-80	1.61417e-79	None	345.923	531.034	0.651414	chr15	72491370	72524164	-	ENSG00000067225.13	524.484	534.684	533.935	349.54	357.454	330.775
H2AFZ	-0.801317	2.82328e-80	2.55279e-79	None	121.279	226.052	0.536507	chr4	100869243	100871545	-	ENSG00000164032.7	233.491	224.352	220.313	128.969	124.796	110.071
HSPA4	-0.719281	2.84011e-80	2.56417e-79	None	27.9168	49.429	0.564786	chr5	132387654	132442141	+	ENSG00000170606.9	51.7361	48.0863	48.4646	28.8694	28.2379	26.6431
GJB3	-0.732581	4.81465e-80	4.34037e-79	None	22.8586	39.5556	0.577885	chr1	35246790	35251970	+	ENSG00000188910.7	40.1385	38.8951	39.6332	23.6008	22.5485	22.4264
SF3A3	-0.697547	5.79977e-80	5.22066e-79	None	20.261	38.6287	0.524508	chr1	38422647	38456593	-	ENSG00000183431.7	40.8122	41.8186	33.2552	19.8835	21.9821	18.9175
STAP2	1.32406	6.21099e-80	5.5825e-79	Up	13.2459	5.82265	2.27489	chr19	4324040	4342783	-	ENSG00000178078.7	6.01401	6.05031	5.40362	13.2108	13.7011	12.8258
NCOA1	0.76803	6.33131e-80	5.68218e-79	None	15.2176	9.43731	1.6125	chr2	24714783	24993571	+	ENSG00000084676.11	8.92913	10.7466	8.63614	14.2089	16.2923	15.1517
C9orf3	0.932923	7.88066e-80	7.0622e-79	None	53.02	29.6506	1.78816	chr9	97488983	97849441	+	ENSG00000148120.10	30.41	29.8679	28.6739	51.1885	50.601	57.2706
SERINC3	0.694181	8.09735e-80	7.24563e-79	None	41.2314	24.2998	1.69678	chr20	43124862	43150750	-	ENSG00000132824.9	23.5233	25.4459	23.9301	49.8788	40.4251	33.3903
OGT	0.570532	8.28695e-80	7.40432e-79	None	94.7048	70.5152	1.34304	chrX	70752933	70795747	+	ENSG00000147162.9	72.6053	70.1283	68.812	96.9991	97.2473	89.868
HFE	1.10019	9.66555e-80	8.62333e-79	Up	10.2268	5.12546	1.99528	chr6	26087509	26098571	+	ENSG00000010704.14	4.1947	5.41829	5.7634	10.1768	9.42012	11.0833
FOXM1	-0.696045	1.09793e-79	9.78096e-79	None	33.0118	56.4927	0.584354	chr12	2966847	2986206	-	ENSG00000111206.8	55.882	57.9528	55.6433	33.8877	32.9847	32.163
YIPF3	0.905377	1.21535e-79	1.08111e-78	None	52.8277	30.4537	1.73469	chr6	43479565	43484728	-	ENSG00000137207.7	28.8457	30.3936	32.1219	55.2047	53.7659	49.5126
DCAF5	0.796354	1.27916e-79	1.13619e-78	None	20.6739	12.947	1.59681	chr14	69517598	69619867	-	ENSG00000139990.13	11.5108	14.5269	12.8032	22.7816	19.474	19.7662
PUS1	-1.21484	1.70956e-79	1.51626e-78	Down	6.47139	17.7894	0.363778	chr12	132413745	132428406	+	ENSG00000177192.9	18.0006	19.095	16.2726	6.07836	7.05146	6.28434
MTA3	0.908668	2.98668e-79	2.6451e-78	None	32.5175	17.2987	1.87976	chr2	42721709	42984087	+	ENSG00000057935.9	18.0331	18.8561	15.007	31.706	33.2042	32.6424
TESK2	1.1746	3.07091e-79	2.71571e-78	Up	10.1257	5.25848	1.9256	chr1	45809555	45956872	-	ENSG00000070759.12	4.66712	5.84996	5.25837	9.78502	9.61349	10.9786
RPS6KA4	-0.96977	3.14362e-79	2.77595e-78	None	8.1951	16.4923	0.496905	chr11	64126620	64139687	+	ENSG00000162302.8	16.4047	16.3323	16.7399	8.11045	7.65109	8.82377
ESYT2	0.565379	3.24678e-79	2.85868e-78	None	45.327	33.1247	1.36838	chr7	158523686	158622944	-	ENSG00000117868.11	33.927	32.2484	33.1985	45.2722	45.6634	45.0455
GLTSCR2	0.832835	3.24639e-79	2.85868e-78	None	36.8272	19.7362	1.86597	chr19	48248779	48260315	+	ENSG00000105373.14	19.237	20.1012	19.8704	39.6263	37.332	33.5234
ZNHIT6	-0.848718	4.11534e-79	3.61815e-78	None	11.0596	21.8282	0.506664	chr1	86115106	86174116	-	ENSG00000117174.6	22.9422	21.2665	21.2759	11.2167	11.2556	10.7063
INA	-0.706628	4.51871e-79	3.967e-78	None	18.9569	33.4299	0.567066	chr10	105036920	105050108	+	ENSG00000148798.5	32.9426	34.1524	33.1946	18.7468	19.6098	18.5141
FAM168A	0.677553	5.21988e-79	4.57592e-78	None	19.3185	13.5587	1.4248	chr11	73111532	73309234	-	ENSG00000054965.6	12.8404	15.0716	12.7642	22.3561	17.823	17.7763
MCCC1	0.80323	7.08964e-79	6.206e-78	None	23.6238	14.2603	1.65662	chr3	182733006	182833863	-	ENSG00000078070.7	14.1152	14.204	14.4618	25.6166	23.2543	22.0007
RFWD3	-0.64532	7.75459e-79	6.77825e-78	None	23.0363	38.3034	0.601417	chr16	74655292	74700779	-	ENSG00000168411.9	38.8551	38.7557	37.2995	23.3758	23.6654	22.0678
SLC11A2	0.766129	9.58728e-79	8.36809e-78	None	23.6365	14.9328	1.58286	chr12	51373184	51422349	-	ENSG00000110911.10	15.7889	14.606	14.4036	23.9461	23.1818	23.7817
HSPB1	0.981979	1.73684e-78	1.51378e-77	None	175.396	95.6965	1.83283	chr7	75931861	75933612	+	ENSG00000106211.8	89.2521	98.3463	99.4912	167.515	173.827	184.846
LANCL1	0.823333	3.12926e-78	2.72345e-77	None	15.0041	8.42053	1.78185	chr2	211295973	211342376	-	ENSG00000115365.7	8.2894	8.37765	8.59452	15.5195	15.4813	14.0116
TMBIM1	0.680308	3.87981e-78	3.3718e-77	None	78.5478	53.4823	1.46867	chr2	219138915	219157309	-	ENSG00000135926.8	50.3529	55.2203	54.8737	79.3166	80.9193	75.4076
RNF19B	0.887972	4.09223e-78	3.5513e-77	None	16.6802	9.68137	1.72292	chr1	33402046	33430286	-	ENSG00000116514.12	9.48768	9.75589	9.80054	16.7077	16.7735	16.5594
CLDN4	0.75672	4.25379e-78	3.68622e-77	None	75.1588	52.9952	1.41822	chr7	73213872	73247014	+	ENSG00000189143.8	49.7379	54.0956	55.152	85.8196	60.2319	79.425
UNC13D	0.835981	4.5236e-78	3.91441e-77	None	24.6005	14.6621	1.67782	chr17	73823306	73840798	-	ENSG00000092929.7	13.6903	15.3383	14.9579	24.4615	24.8248	24.5151
PNP	-1.09988	4.90491e-78	4.23829e-77	Down	11.1887	25.9657	0.430903	chr14	20937113	20945253	+	ENSG00000198805.7	26.6102	25.9594	25.3274	12.23	11.4605	9.87557
GLG1	0.640835	5.81632e-78	5.01866e-77	None	47.517	32.7317	1.45171	chr16	74485856	74641012	-	ENSG00000090863.7	32.0844	33.5459	32.5648	47.2883	48.6082	46.6544
ANAPC7	-0.804592	6.02106e-78	5.1879e-77	None	16.7744	31.7362	0.528558	chr12	110810705	110841535	-	ENSG00000196510.8	31.8234	31.8658	31.5194	18.1934	15.6608	16.469
ETS1	-1.00154	6.62501e-78	5.70015e-77	Down	5.45833	12.285	0.44431	chr11	128328656	128457453	-	ENSG00000134954.10	12.383	12.4161	12.0558	5.36896	5.09996	5.90607
CDC20	-0.64273	7.32675e-78	6.29496e-77	None	107.591	181.705	0.592119	chr1	43824626	43828874	+	ENSG00000117399.9	174.91	184.32	185.886	107.49	112.44	102.844
CCT8	-0.763877	1.32527e-77	1.13702e-76	None	33.6109	62.3804	0.538806	chr21	30428126	30446118	-	ENSG00000156261.8	66.098	62.1321	58.9111	33.3537	34.7195	32.7597
OXR1	0.777996	1.43698e-77	1.23111e-76	None	25.225	15.8676	1.58971	chr8	107282473	107764922	+	ENSG00000164830.13	16.3327	16.2403	15.0298	25.1452	26.8149	23.7149
MAPK8IP3	0.978906	1.50388e-77	1.2866e-76	None	12.3147	7.31145	1.68431	chr16	1756184	1820318	+	ENSG00000138834.8	7.23014	7.41287	7.29134	12.1805	11.5295	13.2342
LLGL2	0.980615	1.60615e-77	1.37216e-76	None	29.299	16.8773	1.736	chr17	73521161	73571289	+	ENSG00000073350.9	14.2826	19.3248	17.0244	28.1339	30.474	29.2889
CYP51A1	-0.797661	2.18574e-77	1.86467e-76	None	24.7647	47.2511	0.524107	chr7	91741465	91772266	-	ENSG00000001630.11	49.389	44.9763	47.3882	26.0594	25.0274	23.2071
SERBP1	-0.599374	2.54455e-77	2.16771e-76	None	73.3732	121.919	0.60182	chr1	67873493	67896098	-	ENSG00000142864.10	125.844	123.348	116.564	74.386	76.8034	68.9301
SDC1	0.650989	2.58261e-77	2.19704e-76	None	73.9042	51.0739	1.44701	chr2	20400558	20425194	-	ENSG00000115884.6	48.8336	52.3682	52.02	75.057	73.8311	72.8246
ABCA2	0.841089	4.32479e-77	3.67394e-76	None	20.3958	12.2503	1.66493	chr9	139901686	139923367	-	ENSG00000107331.12	11.4676	12.5733	12.71	20.233	19.6306	21.3238
SLC44A2	0.587514	4.40542e-77	3.73718e-76	None	134.702	97.7491	1.37804	chr19	10713133	10755235	+	ENSG00000129353.10	94.0024	98.8689	100.376	133.701	138.169	132.237
LAMC1	0.503414	6.66909e-77	5.64955e-76	None	64.4269	49.1904	1.30974	chr1	182992595	183114727	+	ENSG00000135862.5	49.2704	48.9671	49.3337	64.6888	65.5071	63.0846
SRSF2	-0.664041	7.76518e-77	6.56886e-76	None	88.5978	162.043	0.546756	chr17	74730197	74733456	-	ENSG00000161547.10	155.879	159.858	170.391	84.9531	89.2181	91.622
SEPT8	0.801617	8.16123e-77	6.89424e-76	None	19.2927	12.1498	1.5879	chr5	132086509	132142933	-	ENSG00000164402.9	12.0263	12.5058	11.9173	18.8783	19.4731	19.5267
EXOSC2	-0.807628	1.04229e-76	8.79254e-76	None	24.2302	46.3793	0.522434	chr9	133569108	133580248	+	ENSG00000130713.11	46.8874	48.6846	43.5661	25.8285	23.2473	23.6147
HIST1H2AE	-0.632113	1.49007e-76	1.25523e-75	None	220.14	368.54	0.597328	chr6	26217165	26217711	+	ENSG00000168274.3	369.766	368.508	367.347	230.897	222.251	207.271
TGFA	-0.865731	2.23222e-76	1.8778e-75	None	6.26538	13.1847	0.475202	chr2	70674412	70781325	-	ENSG00000163235.11	12.0905	13.7305	13.733	6.22034	6.49414	6.08165
JUN	-1.0102	2.57495e-76	2.1631e-75	Down	6.96243	15.1548	0.45942	chr1	59246465	59249785	-	ENSG00000177606.5	15.3089	14.5042	15.6514	7.00383	6.73513	7.14832
CTSC	-0.802406	2.80012e-76	2.34899e-75	None	15.7227	30.7927	0.510597	chr11	88026760	88070955	-	ENSG00000109861.11	30.1122	30.5269	31.739	15.8938	16.1498	15.1245
HEATR1	-0.612014	3.44319e-76	2.88444e-75	None	20.6715	33.9219	0.609385	chr1	236712305	236767804	-	ENSG00000119285.6	34.9388	33.0883	33.7387	21.3386	21.1598	19.5161
TBRG4	-0.714054	4.19915e-76	3.51286e-75	None	28.2387	49.4479	0.571081	chr7	45139699	45151646	-	ENSG00000136270.9	48.639	50.5282	49.1763	28.1821	28.646	27.8881
BCAT1	0.636352	4.70404e-76	3.92979e-75	None	45.8505	31.3182	1.46402	chr12	24964295	25102393	-	ENSG00000060982.10	31.3298	31.3826	31.2423	44.9557	48.0888	44.507
FMR1	1.04708	4.86842e-76	4.0615e-75	Up	22.3272	10.8849	2.05121	chrX	146993469	147032645	+	ENSG00000102081.9	8.15176	11.6173	12.8855	19.2328	26.1215	21.6272
MAPRE1	-0.564188	5.8846e-76	4.90248e-75	None	58.167	92.9215	0.62598	chr20	31407699	31438211	+	ENSG00000101367.8	93.6986	93.3706	91.6954	58.5363	59.9717	55.9931
ZWILCH	-0.843929	6.02895e-76	5.01582e-75	None	11.2009	20.566	0.544631	chr15	66797297	66842115	+	ENSG00000174442.7	21.3694	20.0775	20.2509	11.0019	11.4743	11.1264
PALLD	-1.03369	7.63896e-76	6.34653e-75	Down	6.51176	13.404	0.485809	chr4	169418217	169849608	+	ENSG00000129116.13	11.3706	14.1253	14.716	5.5248	8.0714	5.9391
MTHFD1	-0.590112	1.17433e-75	9.7431e-75	None	39.4105	63.7668	0.618041	chr14	64854749	64926722	+	ENSG00000100714.11	61.9382	64.4879	64.8741	40.0407	40.1895	38.0011
GFOD1	-0.745799	1.31327e-75	1.08809e-74	None	7.26533	12.5339	0.579656	chr6	13358062	13487894	-	ENSG00000145990.6	13.0601	11.9286	12.613	6.98971	7.77252	7.03376
SIGMAR1	-0.937772	2.99217e-75	2.47572e-74	None	19.5569	40.1633	0.486934	chr9	34634719	34637806	-	ENSG00000147955.12	37.8384	40.7492	41.9023	20.0819	20.1074	18.4814
MOV10	0.848656	3.56154e-75	2.94278e-74	None	22.7736	14.1464	1.60985	chr1	113215763	113243368	+	ENSG00000155363.14	13.1774	14.4768	14.785	23.3426	22.6223	22.3559
NOP58	-0.985315	4.35052e-75	3.58978e-74	None	12.0913	24.8386	0.486793	chr2	203130439	203168389	+	ENSG00000055044.6	26.2451	23.5215	24.7492	12.1948	12.0303	12.0488
LAMP2	0.620728	5.34118e-75	4.40119e-74	None	43.4012	31.0737	1.39672	chrX	119561682	119603220	-	ENSG00000005893.11	31.258	31.724	30.239	42.7826	45.5212	41.8999
CD276	0.674373	8.24777e-75	6.787e-74	None	49.7224	34.4072	1.44512	chr15	73976307	74006859	+	ENSG00000103855.13	33.7901	34.526	34.9054	48.4737	51.3571	49.3364
UPK3B	1.45665	8.66367e-75	7.11953e-74	Up	15.3004	6.15115	2.4874	chr7	76139745	76648340	+	ENSG00000243566.2	5.54352	6.13879	6.77114	17.3282	14.2498	14.3231
RAB5B	0.659521	9.32776e-75	7.65485e-74	None	42.1594	30.3036	1.39123	chr12	56367697	56388490	+	ENSG00000111540.11	29.4577	31.6412	29.812	45.7909	40.4463	40.241
WDFY3	0.695334	1.41509e-74	1.15972e-73	None	14.9091	9.69497	1.53782	chr4	85590704	85887544	-	ENSG00000163625.11	9.82241	9.50654	9.75596	13.997	15.2818	15.4486
ATP11B	0.61405	1.70596e-74	1.3962e-73	None	30.9729	21.6693	1.42934	chr3	182511288	182639423	+	ENSG00000058063.11	21.4643	21.9174	21.6264	31.0625	31.8452	30.011
MCMBP	-0.73236	2.05474e-74	1.67938e-73	None	22.493	41.1978	0.545976	chr10	121588972	121652068	-	ENSG00000197771.8	42.4987	41.1439	39.9507	22.64	23.5793	21.2597
FAM83B	0.795012	2.92578e-74	2.38807e-73	None	19.1139	11.9068	1.60529	chr6	54711569	54806820	+	ENSG00000168143.8	12.1916	11.9148	11.614	18.9006	19.6081	18.8329
CDCA7	-1.01186	6.46683e-74	5.27121e-73	Down	12.4385	27.3921	0.45409	chr2	174219548	174233725	+	ENSG00000144354.9	28.172	26.8609	27.1433	13.5936	12.7617	10.9601
GOLPH3L	0.727457	8.09086e-74	6.58609e-73	None	33.3692	21.8913	1.52431	chr1	150618701	150669630	-	ENSG00000143457.6	21.9287	22.3415	21.4038	32.4941	34.2162	33.3974
HEXA	0.776279	9.09916e-74	7.39689e-73	None	27.8617	17.2559	1.61462	chr15	72635775	72668817	-	ENSG00000213614.5	15.7164	17.0773	18.9739	30.8586	27.2977	25.4288
CORO1B	0.859148	1.06512e-73	8.64695e-73	None	32.1202	19.205	1.67249	chr11	67205519	67211292	-	ENSG00000172725.9	18.2914	20.4333	18.8902	33.0378	32.9769	30.3459
RDH11	-0.798648	1.39614e-73	1.13191e-72	None	17.8187	33.7032	0.528695	chr14	68143518	68162531	-	ENSG00000072042.8	34.556	31.8677	34.6858	17.6818	17.8189	17.9554
DHX33	-0.721795	2.35323e-73	1.9053e-72	None	9.41723	16.6823	0.564505	chr17	5344232	5372380	-	ENSG00000005100.8	16.6296	16.4266	16.9906	9.25362	9.47326	9.52481
SMS	-0.668969	2.37241e-73	1.91825e-72	None	48.0757	82.3721	0.58364	chrX	21958691	22025798	+	ENSG00000102172.11	83.6858	82.1866	81.2439	47.5703	50.6653	45.9914
RRP1B	-0.728879	2.42317e-73	1.95668e-72	None	9.0336	16.1738	0.558534	chr21	45079429	45115958	+	ENSG00000160208.11	16.4436	15.8148	16.2629	9.11456	9.33438	8.65186
SAPCD2	-0.731607	3.44487e-73	2.77797e-72	None	20.0729	36.0076	0.557462	chr9	139956581	139965040	-	ENSG00000186193.7	34.12	36.3958	37.507	20.558	20.2935	19.3672
DNASE2	1.05091	3.82286e-73	3.07868e-72	Up	22.931	12.0191	1.90788	chr19	12986025	12992282	-	ENSG00000105612.4	11.0988	12.6729	12.2856	24.4655	22.778	21.5494
FKBP8	0.675841	4.79885e-73	3.85953e-72	None	63.0345	43.5175	1.44849	chr19	18642561	18654887	-	ENSG00000105701.11	41.5692	44.3995	44.5838	65.1305	64.8566	59.1163
PTP4A1	-0.883146	6.78804e-73	5.45209e-72	None	9.86783	19.432	0.507813	chr6	64231666	64293492	+	ENSG00000112245.6	20.6847	18.6333	18.9781	9.98021	10.2723	9.35096
NPM1	-0.666361	1.07269e-72	8.6043e-72	None	662.194	1141.92	0.579893	chr5	170814120	170838141	+	ENSG00000181163.9	1184.94	1120.6	1120.23	684.237	694.348	607.998
TUBB	-0.724078	1.1424e-72	9.15131e-72	None	16.185	28.9411	0.55924	chr6	30687978	30693203	+	ENSG00000196230.8	28.7651	29.4809	28.5772	16.1795	16.6644	15.7111
TFPI2	1.14118	1.15836e-72	9.26235e-72	Up	11.1434	5.38394	2.06975	chr7	93514709	93520303	-	ENSG00000105825.7	5.38019	5.10812	5.66352	11.6876	11.0584	10.6843
PGAM5	-0.916241	1.15933e-72	9.26235e-72	None	10.5992	19.6972	0.538108	chr12	133287405	133299228	+	ENSG00000247077.2	18.6914	20.2303	20.1697	10.8176	11.1434	9.83661
ITM2C	0.946283	2.32832e-72	1.85774e-71	None	22.2649	12.5761	1.77041	chr2	231729354	231743963	+	ENSG00000135916.11	11.6767	13.0002	13.0514	22.5411	22.1427	22.1109
NCSTN	0.735478	2.42576e-72	1.93293e-71	None	24.1716	16.5829	1.45762	chr1	160313062	160328742	+	ENSG00000162736.11	16.7441	16.1214	16.8833	24.8286	24.3736	23.3126
MYADM	0.802923	2.80038e-72	2.2285e-71	None	18.6795	11.6957	1.59713	chr19	54369477	54379691	+	ENSG00000179820.11	11.0677	11.8998	12.1196	18.828	19.1576	18.0529
NCAPD3	-0.647474	2.82339e-72	2.24385e-71	None	15.2711	25.3084	0.603402	chr11	134020014	134095348	-	ENSG00000151503.8	25.2158	25.5321	25.1772	15.2928	15.7669	14.7537
F3	-0.735356	2.83745e-72	2.25206e-71	None	55.9334	99.4885	0.56221	chr1	94994781	95007356	-	ENSG00000117525.9	102.852	97.7733	97.8402	55.3121	59.5395	52.9486
SPDL1	-0.831462	3.49318e-72	2.76887e-71	None	18.3654	34.4144	0.533655	chr5	169010638	169031782	+	ENSG00000040275.12	35.4313	33.2685	34.5433	17.4704	19.848	17.7778
BTBD11	-0.826015	3.60891e-72	2.85686e-71	None	5.78783	11.0159	0.525407	chr12	107712190	108053419	+	ENSG00000151136.10	11.1727	10.9244	10.9506	6.01879	5.66362	5.6811
CLSTN1	0.602043	4.56873e-72	3.61192e-71	None	68.788	49.0029	1.40375	chr1	9789084	9884584	-	ENSG00000171603.12	47.3998	49.4544	50.1546	68.6601	69.5442	68.1595
TMED10	0.571779	4.74654e-72	3.7476e-71	None	73.5393	53.8302	1.36614	chr14	75598173	75643334	-	ENSG00000170348.4	53.6396	53.7327	54.1182	76.0805	75.3932	69.1443
DDAH1	-0.6767	5.0299e-72	3.96614e-71	None	18.333	30.2214	0.606625	chr1	85784164	86043933	-	ENSG00000153904.14	31.2791	29.8583	29.5267	18.3949	18.4661	18.1381
MALL	0.818585	5.18839e-72	4.08577e-71	None	35.669	21.5969	1.65158	chr2	110841447	110874143	-	ENSG00000144063.3	21.4264	22.3554	21.0089	35.1398	35.4886	36.3787
ALDH1B1	-1.00292	5.45986e-72	4.29395e-71	Down	5.07773	10.9973	0.461727	chr9	38392661	38398658	+	ENSG00000137124.6	10.758	11.1418	11.0921	5.26119	5.00169	4.9703
RNF213	0.720137	5.68074e-72	4.46186e-71	None	31.9674	21.7431	1.47023	chr17	78234665	78372586	+	ENSG00000173821.15	23.872	19.662	21.6952	31.8836	31.4468	32.5718
NPEPPS	0.518157	7.1412e-72	5.60167e-71	None	85.7025	60.8348	1.40878	chr17	45600308	45700642	+	ENSG00000141279.11	59.8292	62.3357	60.3395	87.9885	83.5902	85.5289
HMGCL	1.4094	8.23508e-72	6.45134e-71	Up	10.4159	4.20868	2.47486	chr1	24128375	24165110	-	ENSG00000117305.10	4.23878	4.4624	3.92485	10.7646	10.7607	9.72232
TINAGL1	0.657166	9.43299e-72	7.38021e-71	None	91.8838	64.7864	1.41826	chr1	32042116	32053288	+	ENSG00000142910.11	61.4134	68.0142	64.9314	93.9421	97.989	83.7204
NDC1	-0.689707	1.01426e-71	7.92511e-71	None	37.9146	67.9613	0.557885	chr1	54231133	54304533	-	ENSG00000058804.10	63.6354	77.2196	63.0289	41.4817	40.6272	31.6348
CTDSPL	0.628346	1.05062e-71	8.1986e-71	None	28.6467	19.7975	1.44699	chr3	37903451	38025960	+	ENSG00000144677.10	18.3779	19.6431	21.3714	29.2494	28.906	27.7849
GRHL1	0.881751	1.18086e-71	9.20306e-71	None	10.9361	6.39761	1.70941	chr2	10085341	10142411	+	ENSG00000134317.13	6.2779	6.53957	6.37535	11.1973	10.8905	10.7205
SECISBP2L	0.735505	1.60039e-71	1.24566e-70	None	13.5537	8.17829	1.65728	chr15	49280673	49338760	-	ENSG00000138593.4	8.54781	7.81687	8.17019	13.4525	13.7802	13.4284
LETM1	-0.742612	1.94768e-71	1.51403e-70	None	10.396	18.4232	0.564289	chr4	1813206	1857974	-	ENSG00000168924.10	17.6716	18.6868	18.9113	10.323	10.6361	10.229
RIT1	0.93342	2.17461e-71	1.68825e-70	None	14.6762	8.43824	1.73926	chr1	155867599	155881195	-	ENSG00000143622.6	8.29323	7.98449	9.03699	15.8375	14.6029	13.5884
PLA2G16	1.03112	2.45869e-71	1.90635e-70	Up	14.7261	8.05648	1.82786	chr11	63340667	63384355	-	ENSG00000176485.6	8.36462	7.5332	8.27163	15.1559	14.5064	14.5161
PTPN13	0.697131	2.91703e-71	2.25883e-70	None	10.9806	7.44877	1.47415	chr4	87515468	87736324	+	ENSG00000163629.8	7.5548	7.22646	7.56504	10.8692	11.3528	10.7199
NUDC	-0.956431	3.40472e-71	2.6331e-70	None	13.234	27.4665	0.481825	chr1	27226729	27273353	+	ENSG00000090273.9	26.7938	28.4669	27.1386	12.6546	13.5574	13.4901
SCARB2	0.738685	3.44059e-71	2.65743e-70	None	20.0147	12.9089	1.55046	chr4	77079890	77135046	-	ENSG00000138760.4	12.4483	13.3037	12.9746	20.8614	20.9054	18.2772
CKS1B	-0.72934	4.14421e-71	3.19681e-70	None	74.8533	133.87	0.559148	chr1	154947129	154951725	+	ENSG00000173207.8	133.872	132.614	135.125	76.6652	79.6717	68.223
TPT1	0.653195	4.74009e-71	3.6518e-70	None	475.41	325.053	1.46256	chr13	45911008	45915505	-	ENSG00000133112.12	328.208	335.933	311.018	492.012	493.634	440.583
GPR56	0.708872	5.03108e-71	3.87105e-70	None	40.3379	26.5807	1.51756	chr16	57644564	57698944	+	ENSG00000205336.7	25.2139	26.9591	27.5691	40.4965	39.8164	40.7008
HIST1H2BJ	-0.670798	6.54325e-71	5.02814e-70	None	155.35	271.625	0.571927	chr6	27093676	27100541	-	ENSG00000124635.7	267.729	260.269	286.878	158.198	156.539	151.312
SYNCRIP	-0.660705	1.0018e-70	7.68856e-70	None	28.7384	49.5345	0.58017	chr6	86318053	86353510	-	ENSG00000135316.13	51.8432	48.3445	48.4157	28.702	30.4562	27.0572
KPNA3	-0.708414	1.08325e-70	8.30309e-70	None	13.9075	24.5654	0.566142	chr13	50273447	50367057	-	ENSG00000102753.5	25.2848	24.0747	24.3368	14.4037	13.7156	13.6033
PRKCH	0.951006	1.38989e-70	1.064e-69	None	13.4195	7.07503	1.89675	chr14	61654277	62017694	+	ENSG00000027075.9	7.32917	6.76837	7.12754	12.9235	13.0652	14.27
NUCB1	0.765961	1.78331e-70	1.36345e-69	None	46.7691	29.7684	1.5711	chr19	49403307	49426629	+	ENSG00000104805.11	28.3715	29.3159	31.6177	46.8469	46.9455	46.5149
PGAP1	0.796553	1.91128e-70	1.45943e-69	None	16.9183	9.50467	1.78	chr2	197697728	197792520	-	ENSG00000197121.10	9.4972	9.20816	9.80864	14.5646	16.6196	19.5708
UPP1	-1.06027	1.99357e-70	1.52035e-69	Down	9.7958	21.8152	0.449036	chr7	48128225	48148330	+	ENSG00000183696.9	22.7359	23.1215	19.5881	10.1209	9.15342	10.1131
PNISR	0.622375	2.6854e-70	2.04538e-69	None	36.6834	24.6549	1.48788	chr6	99845927	99873207	-	ENSG00000132424.10	24.9919	24.6575	24.3152	37.7942	37.0601	35.1958
SUMF2	0.675009	5.19755e-70	3.9538e-69	None	331.273	230.187	1.43915	chr7	56131695	56148363	+	ENSG00000129103.13	224.363	226.201	239.998	330.424	341.94	321.457
STAT6	0.697476	6.05945e-70	4.60365e-69	None	33.6626	22.723	1.48143	chr12	57489191	57525922	-	ENSG00000166888.6	22.1336	23.0857	22.9498	34.1905	33.6989	33.0984
JUNB	1.1435	6.32186e-70	4.79699e-69	Up	13.6278	6.65918	2.04648	chr19	12902310	12904124	+	ENSG00000171223.4	6.17924	7.05008	6.74821	14.0798	13.8135	12.9902
C1orf63	0.843985	1.06353e-69	8.05986e-69	None	19.656	11.6307	1.69001	chr1	25568728	25664704	-	ENSG00000117616.13	12.3679	10.3152	12.209	19.3935	19.723	19.8516
SLC25A19	-1.35263	1.41434e-69	1.0705e-68	Down	4.27575	11.8912	0.359573	chr17	73269073	73285591	-	ENSG00000125454.7	11.448	12.5524	11.6731	4.78966	4.32683	3.71075
PRDX6	-0.556513	1.48494e-69	1.12253e-68	None	142.851	226.71	0.630103	chr1	173446405	173457946	+	ENSG00000117592.8	234.12	224.906	221.105	145.544	146.136	136.873
GPR108	0.831178	1.80116e-69	1.35988e-68	None	26.5625	16.2757	1.63203	chr19	6729925	6737614	-	ENSG00000125734.9	15.3939	16.791	16.6422	27.5155	26.8379	25.334
MKNK2	0.664665	1.80354e-69	1.35997e-68	None	69.4631	49.1527	1.41321	chr19	2037470	2051243	-	ENSG00000099875.10	47.4331	45.4589	54.566	70.7293	64.5356	73.1242
MOB3C	0.892798	1.86774e-69	1.40663e-68	None	10.7728	6.76181	1.59319	chr1	47073387	47082563	-	ENSG00000142961.10	6.67368	7.08409	6.52768	11.2272	11.0859	10.0055
SETD7	-0.85066	2.5046e-69	1.88157e-68	None	5.75625	11.1679	0.515429	chr4	140417095	140527853	-	ENSG00000145391.9	11.4517	10.6186	11.4333	5.63604	6.08863	5.54408
C1GALT1	0.71351	2.50391e-69	1.88157e-68	None	15.9958	9.99344	1.60063	chr7	7196565	7288282	+	ENSG00000106392.6	10.078	10.2401	9.66216	16.4929	15.5391	15.9554
SEMA4B	0.886242	2.69235e-69	2.0201e-68	None	33.4021	19.6689	1.69822	chr15	90703836	90772911	+	ENSG00000185033.10	18.2114	19.6122	21.1831	34.1584	32.0983	33.9496
ARHGEF12	0.561288	3.26333e-69	2.44548e-68	None	32.421	23.3402	1.38906	chr11	120207787	120360645	+	ENSG00000196914.4	23.773	22.934	23.3136	32.3285	33.2568	31.6778
LAD1	-0.658905	4.71589e-69	3.52962e-68	None	29.0086	49.0875	0.590956	chr1	201342372	201368736	-	ENSG00000159166.9	47.0082	49.9939	50.2606	28.4697	30.2068	28.3491
SNRPB	-0.60109	4.75873e-69	3.55727e-68	None	101.664	167.498	0.606959	chr20	2442280	2451499	-	ENSG00000125835.13	163.844	168.756	169.893	104.618	105.265	95.1099
OBSL1	1.15785	5.48059e-69	4.09181e-68	Up	10.2079	4.88981	2.08759	chr2	220415451	220436581	-	ENSG00000124006.10	4.47985	4.92053	5.26904	10.7126	9.88472	10.0264
HIST1H2BL	-0.775844	7.68471e-69	5.73032e-68	None	156.304	289.185	0.540499	chr6	27775257	27775709	-	ENSG00000185130.4	271.791	308.385	287.379	157.891	159.353	151.669
SRC	1.02542	8.24199e-69	6.1383e-68	Up	11.8688	5.20845	2.27876	chr20	35973088	36034453	+	ENSG00000197122.7	4.83289	5.46826	5.3242	11.6795	12.2779	11.649
FIBCD1	1.1965	8.83692e-69	6.57327e-68	Up	14.8689	7.36476	2.01892	chr9	133777825	133814673	-	ENSG00000130720.8	6.86074	7.0472	8.18632	14.5149	15.1051	14.9866
MINK1	0.719655	9.07215e-69	6.73995e-68	None	30.0075	20.0326	1.49794	chr17	4736683	4801356	+	ENSG00000141503.11	19.289	21.0415	19.7672	30.0412	29.6781	30.3032
RNF19A	0.654762	9.21862e-69	6.84035e-68	None	23.8436	15.6823	1.52042	chr8	101269288	101348446	-	ENSG00000034677.7	15.9286	15.4171	15.701	24.3197	23.5861	23.625
TEX2	-0.671302	9.3309e-69	6.91517e-68	None	13.7908	23.6107	0.584091	chr17	62224587	62340661	-	ENSG00000136478.3	24.5716	23.5903	22.6704	13.866	14.1375	13.369
CTNNAL1	-0.910376	1.11752e-68	8.27182e-68	None	24.3619	49.1173	0.495995	chr9	111704851	111775809	-	ENSG00000119326.10	52.9481	47.3765	47.0272	25.1276	25.2362	22.722
CREG1	0.887854	1.45823e-68	1.07805e-67	None	39.3593	22.9823	1.71259	chr1	167498914	167523004	-	ENSG00000143162.7	24.0336	22.2269	22.6863	42.2723	40.2313	35.5743
SGPL1	0.590644	1.59445e-68	1.17732e-67	None	22.4767	16.2109	1.38652	chr10	72575717	72640930	+	ENSG00000166224.12	16.0005	16.414	16.2184	23.032	22.6373	21.7609
MACC1	0.55796	1.62817e-68	1.20075e-67	None	43.3458	30.2466	1.43308	chr7	20174278	20257027	-	ENSG00000183742.8	30.3706	29.9388	30.4305	42.1059	43.5465	44.3849
GM2A	1.0139	2.62616e-68	1.93439e-67	Up	10.9028	5.89205	1.85043	chr5	150591711	150650001	+	ENSG00000196743.4	5.49	6.14328	6.04286	10.6117	11.6235	10.4733
NOC3L	-1.03405	3.6849e-68	2.71093e-67	Down	8.3412	18.4443	0.452238	chr10	96075004	96122716	-	ENSG00000173145.7	20.161	17.8421	17.3297	8.71675	8.49384	7.81302
MAGED2	1.08138	5.53762e-68	4.069e-67	Up	13.1968	6.72482	1.9624	chrX	54834032	54842445	+	ENSG00000102316.12	6.77524	7.00376	6.39547	13.5616	13.0993	12.9296
RAD54L	-0.810596	5.58126e-68	4.09609e-67	None	9.99263	18.2326	0.548065	chr1	46713360	46744145	+	ENSG00000085999.7	18.0421	19.0206	17.6349	9.70454	9.89976	10.3736
CREB3L2	0.816168	6.60186e-68	4.83923e-67	None	10.1124	6.09038	1.66039	chr7	137559725	137686813	-	ENSG00000182158.10	5.87727	6.19543	6.19843	9.60136	10.3675	10.3683
ZNF713	0.957133	6.8932e-68	5.04666e-67	None	15.4187	8.71246	1.76973	chr7	55955169	56009918	+	ENSG00000178665.10	8.68812	8.86487	8.58439	15.6386	15.2583	15.359
HSPA5	-0.565731	1.06125e-67	7.76021e-67	None	133.576	213.493	0.625668	chr9	127997132	128003609	-	ENSG00000044574.7	214.825	211.697	213.956	140.304	136.311	124.112
UTP11L	-0.823607	1.31296e-67	9.58925e-67	None	12.472	24.1573	0.516282	chr1	38474930	38490496	+	ENSG00000183520.7	24.4432	23.6213	24.4073	12.8035	12.6764	11.936
UAP1	-1.00528	1.45348e-67	1.06027e-66	Down	10.081	21.6115	0.466463	chr1	162531323	162569627	+	ENSG00000117143.9	22.3999	21.3094	21.1252	9.85293	10.652	9.73798
WDFY1	0.751692	1.53874e-67	1.12111e-66	None	17.9006	10.8501	1.64981	chr2	224720433	224810104	-	ENSG00000085449.10	11.2157	10.5338	10.8009	17.8425	18.227	17.6323
MRPS17	-0.748405	1.90892e-67	1.38914e-66	None	46.5065	84.2802	0.551809	chr7	56019512	56024192	+	ENSG00000239789.1	79.2277	89.6221	83.9909	47.4857	48.5592	43.4748
PPFIBP1	0.599476	2.29129e-67	1.66539e-66	None	35.8144	23.7057	1.51079	chr12	27676364	27848497	+	ENSG00000110841.9	20.4097	23.5916	27.1158	30.9814	39.3181	37.1438
SUPT16H	-0.545106	2.42618e-67	1.76131e-66	None	32.8216	50.753	0.646692	chr14	21819631	21852425	-	ENSG00000092201.5	50.8019	50.3669	51.0902	33.4979	33.8735	31.0933
EEF1A2	0.886751	2.54153e-67	1.84284e-66	None	34.1574	20.0269	1.70557	chr20	62119366	62130505	-	ENSG00000101210.6	19.113	21.1622	19.8056	32.8485	34.8762	34.7476
SPG11	0.68228	3.78887e-67	2.74398e-66	None	12.1077	8.42105	1.43779	chr15	44854894	44955876	-	ENSG00000104133.10	8.66282	8.57638	8.02395	11.9947	11.5994	12.729
CRIM1	0.514876	3.94026e-67	2.8502e-66	None	47.5263	35.2231	1.34929	chr2	36583069	36778278	+	ENSG00000150938.5	34.5401	35.609	35.5202	46.9888	48.2406	47.3497
BRI3BP	-0.659962	4.70465e-67	3.39905e-66	None	8.94864	15.2779	0.585723	chr12	125478246	125515777	+	ENSG00000184992.10	15.4136	14.908	15.5122	9.03	9.02389	8.79203
C5orf56	1.73512	5.00578e-67	3.61229e-66	Up	10.7664	3.64733	2.95187	chr5	131746328	131811736	+	ENSG00000197536.6	3.79346	2.84821	4.30031	11.0091	10.7584	10.5318
MIEF1	-0.668018	5.13485e-67	3.70102e-66	None	11.6664	19.5464	0.596856	chr22	39895437	39914137	+	ENSG00000100335.8	18.8542	19.6239	20.1611	11.9699	12.0356	10.9936
GARS	-0.636006	5.19375e-67	3.73901e-66	None	36.9165	60.1791	0.613444	chr7	30634297	30673649	+	ENSG00000106105.9	60.0843	59.7161	60.7368	35.7175	35.8841	39.148
TYMS	-0.628004	6.92256e-67	4.97765e-66	None	62.5639	107.183	0.583713	chr18	657604	673578	+	ENSG00000176890.11	106.555	110.623	104.369	63.4645	65.1881	59.039
PRNP	-0.662838	7.52274e-67	5.40278e-66	None	51.4242	86.9971	0.591103	chr20	4666882	4682236	+	ENSG00000171867.12	88.312	87.7428	84.9364	51.405	54.5432	48.3244
KRT7	0.893912	8.19574e-67	5.87913e-66	None	49.1204	29.732	1.6521	chr12	52626304	52645970	+	ENSG00000135480.10	28.274	29.8873	31.0348	48.0197	50.3546	48.9867
LGR4	0.675098	1.00836e-66	7.22477e-66	None	21.0426	13.8021	1.52459	chr11	27387508	27494322	-	ENSG00000205213.9	13.7621	13.69	13.9542	21.7344	21.3902	20.0031
TRIB1	-0.940123	1.01273e-66	7.24751e-66	None	5.09919	10.397	0.490448	chr8	126442563	126450647	+	ENSG00000173334.3	10.1053	10.3938	10.6919	5.28329	5.15916	4.85511
QSOX2	-0.748402	1.05236e-66	7.5222e-66	None	11.7862	21.2061	0.555791	chr9	139098179	139137687	-	ENSG00000165661.11	21.2934	20.8675	21.4573	12.7278	11.6717	10.959
FBXO45	-0.822038	1.45585e-66	1.0394e-65	None	7.13966	14.0277	0.50897	chr3	196295482	196315930	+	ENSG00000174013.7	14.7361	13.6921	13.6549	7.55383	7.3449	6.52025
PTK2B	0.903713	1.74223e-66	1.24239e-65	None	14.529	8.19443	1.77303	chr8	27168999	27316903	+	ENSG00000120899.13	7.56731	7.75451	9.26148	14.011	14.922	14.654
UBXN7	0.600594	1.90531e-66	1.35708e-65	None	28.349	19.8672	1.42692	chr3	196074533	196159345	-	ENSG00000163960.7	20.2826	19.3387	19.9804	27.2878	29.7996	27.9595
RP11-1407O15.2	0.815147	2.34665e-66	1.66947e-65	None	20.4691	13.8903	1.47363	chr17	36337717	36421858	-	ENSG00000174093.6	13.2644	15.3971	13.0093	20.5329	19.0746	21.7997
MARS	-0.62424	2.42106e-66	1.72038e-65	None	36.2527	59.5342	0.608939	chr12	57869228	57911352	+	ENSG00000166986.8	58.5017	60.9941	59.1067	36.8549	35.7061	36.1971
RICTOR	0.682442	2.79097e-66	1.9809e-65	None	27.717	18.4291	1.50398	chr5	38938021	39074510	-	ENSG00000164327.8	20.4386	17.5693	17.2794	27.4994	29.3277	26.3239
TPI1	-0.598612	3.04594e-66	2.15933e-65	None	180.996	295.319	0.612881	chr12	6976283	6980112	+	ENSG00000111669.10	288.06	299.833	298.065	182.088	191.756	169.143
POLE3	-0.741975	3.81041e-66	2.69811e-65	None	61.7105	111.89	0.551526	chr9	116169515	116172952	-	ENSG00000148229.8	114.626	110.668	110.378	64.6698	65.5064	54.9554
MDN1	-0.602431	4.23016e-66	2.99182e-65	None	8.7063	14.2627	0.610425	chr6	90352218	90529442	-	ENSG00000112159.7	14.2609	14.0243	14.5029	8.759	8.57378	8.78612
C12orf23	0.826471	5.12144e-66	3.61795e-65	None	18.1312	10.2084	1.7761	chr12	107349497	107372556	+	ENSG00000151135.5	10.312	9.49489	10.8184	18.4563	18.4284	17.5091
VPS39	0.732744	5.49596e-66	3.87799e-65	None	18.089	10.8428	1.66829	chr15	42450899	42500514	-	ENSG00000166887.11	10.9832	10.2027	11.3425	16.9103	19.4252	17.9316
KPNB1	-0.510783	7.2915e-66	5.13893e-65	None	66.3423	100.446	0.660476	chr17	45726842	45762871	+	ENSG00000108424.5	102.434	100.189	98.7153	64.2879	68.509	66.23
C10orf118	0.746958	7.84385e-66	5.52178e-65	None	11.595	6.77459	1.71155	chr10	115880621	115933979	-	ENSG00000165813.12	7.01948	6.70144	6.60284	10.9787	12.0329	11.7735
LSM10	-0.92789	8.96263e-66	6.30201e-65	None	19.9709	41.2243	0.484444	chr1	36856839	36863493	-	ENSG00000181817.5	40.2752	41.8875	41.5104	20.6819	20.4405	18.7903
TNKS	0.698197	1.20652e-65	8.47373e-65	None	17.8404	11.6646	1.52944	chr8	9413424	9639856	+	ENSG00000173273.11	12.0188	11.4556	11.5194	17.8779	17.5303	18.1129
AGBL5	0.7506	2.39063e-65	1.67705e-64	None	28.2076	18.4398	1.52971	chr2	27265232	27293490	+	ENSG00000084693.11	17.9813	18.7568	18.5814	27.5203	29.5456	27.5569
TUBG1	-0.805831	4.62106e-65	3.23796e-64	None	21.167	39.9915	0.529287	chr17	40761694	40767252	+	ENSG00000131462.3	39.0112	40.9374	40.0261	20.5389	21.4259	21.5361
SCPEP1	1.2002	6.18403e-65	4.3281e-64	Up	16.3575	7.50287	2.18017	chr17	55055466	55084129	+	ENSG00000121064.8	7.09663	7.98274	7.42924	17.6476	16.2296	15.1954
CITED2	0.752293	7.45962e-65	5.21482e-64	None	35.8465	22.9845	1.55959	chr6	139693393	139695757	-	ENSG00000164442.8	22.4832	22.6614	23.809	34.9444	37.2907	35.3045
WDR75	-0.703596	8.57614e-65	5.98842e-64	None	39.5196	67.041	0.589484	chr2	190306159	190340291	+	ENSG00000115368.5	70.2881	66.4131	64.4217	40.2617	38.5923	39.7047
POLD2	-0.674215	9.50627e-65	6.63024e-64	None	49.1241	82.6752	0.594182	chr7	44154286	44163957	-	ENSG00000106628.6	78.7757	83.4861	85.7637	47.7364	51.5269	48.109
C20orf27	-0.914571	9.67172e-65	6.73785e-64	None	17.3167	35.5737	0.486783	chr20	3734155	3749034	-	ENSG00000101220.13	32.6848	38.1294	35.907	16.4545	18.2405	17.255
ELAVL1	-0.589302	1.09891e-64	7.64676e-64	None	19.5015	31.3188	0.622678	chr19	8023463	8070543	-	ENSG00000066044.9	31.7603	30.9708	31.2253	19.248	20.343	18.9136
KIAA0020	-1.12834	1.31331e-64	9.1282e-64	Down	6.69333	15.678	0.426926	chr9	2720469	2844241	-	ENSG00000080608.9	16.1399	15.627	15.267	7.34707	6.66574	6.06719
FBXL20	0.963203	1.32376e-64	9.19027e-64	None	12.727	7.16404	1.77651	chr17	37415384	37558776	-	ENSG00000108306.7	6.74326	7.34759	7.40127	12.8038	12.5587	12.8185
SEMA4D	0.696196	1.39773e-64	9.69265e-64	None	24.0391	16.0433	1.49839	chr9	91975702	92113045	-	ENSG00000187764.7	15.3249	16.3034	16.5018	23.7347	23.4904	24.8923
EIF3J	-0.852028	1.7997e-64	1.24658e-63	None	13.0942	29.1893	0.448597	chr15	44829255	44855227	+	ENSG00000104131.8	30.4579	27.3675	29.7425	11.8289	15.843	11.6107
BNIP3L	0.714686	1.90187e-64	1.31584e-63	None	19.6552	12.9136	1.52205	chr8	26240414	26363152	+	ENSG00000104765.10	12.8823	12.8829	12.9757	19.6716	20.7578	18.5361
MRPS12	-0.958357	1.99262e-64	1.37705e-63	None	18.2937	39.9902	0.457454	chr19	39421188	39423802	+	ENSG00000128626.7	37.7665	41.2096	40.9945	18.4984	18.2474	18.1352
NCLN	-0.715829	2.07854e-64	1.43479e-63	None	13.3892	23.6583	0.56594	chr19	3185561	3209573	+	ENSG00000125912.6	22.6855	24.3118	23.9776	13.2414	13.4958	13.4303
GINS1	-0.692923	2.43139e-64	1.67644e-63	None	17.5652	30.1449	0.582691	chr20	25388363	25433264	+	ENSG00000101003.8	28.3985	31.6145	30.4217	17.937	18.6075	16.151
ZNF142	-0.846525	2.58365e-64	1.77939e-63	None	5.54591	11.0005	0.50415	chr2	219502639	219524378	-	ENSG00000115568.11	10.4879	11.2208	11.2928	5.79104	5.62698	5.21971
PSCA	1.58405	3.64489e-64	2.50742e-63	Up	12.8775	4.619	2.78795	chr8	143751726	143764142	+	ENSG00000167653.4	4.01653	5.05358	4.78689	12.8267	12.7998	13.0061
TXN	-0.868043	3.82578e-64	2.62886e-63	None	122.658	241.355	0.508205	chr9	113006091	113018920	-	ENSG00000136810.8	246.379	250.821	226.864	126.899	133.131	107.943
TBC1D10A	1.17192	5.08385e-64	3.48937e-63	Up	11.3018	5.34394	2.11489	chr22	30687979	30723035	-	ENSG00000099992.11	4.73607	5.69875	5.59699	10.7828	11.4272	11.6955
MAK16	-0.969395	7.2523e-64	4.97207e-63	None	6.24435	13.1275	0.47567	chr8	33342268	33358778	+	ENSG00000198042.6	13.8921	13.0487	12.4417	6.60193	6.23644	5.8947
RUVBL1	-0.838897	7.4349e-64	5.09147e-63	None	16.2523	31.9353	0.508912	chr3	127783621	127872757	-	ENSG00000175792.7	30.6776	30.8502	34.2782	16.4874	17.1018	15.1677
PTGES2	-0.651307	7.74178e-64	5.29562e-63	None	31.0687	52.4424	0.592434	chr9	130882972	130890741	-	ENSG00000148334.10	56.6545	46.0916	54.5809	29.8405	37.3562	26.0092
CERCAM	0.903262	7.79295e-64	5.3246e-63	None	13.8957	8.34273	1.66561	chr9	131174030	131199626	+	ENSG00000167123.14	7.86724	8.64037	8.52057	14.2528	14.3108	13.1236
QSOX1	0.587258	1.5991e-63	1.09136e-62	None	21.0186	17.1219	1.22758	chr1	180123969	180173165	+	ENSG00000116260.12	16.7833	16.3053	18.2773	21.6058	20.5015	20.9486
PEAK1	0.649647	2.04323e-63	1.3929e-62	None	10.7622	7.05857	1.5247	chr15	77400471	77712486	-	ENSG00000173517.6	6.85372	7.22961	7.09238	10.1784	10.8956	11.2125
C6orf132	0.843296	2.07853e-63	1.41537e-62	None	15.2085	11.0468	1.37674	chr6	42068856	42110357	-	ENSG00000188112.4	10.5814	11.0031	11.5558	14.2617	15.8251	15.5386
NUP93	-0.650151	2.54905e-63	1.73382e-62	None	25.4279	42.5641	0.597402	chr16	56764017	56878797	+	ENSG00000102900.8	42.3703	43.3674	41.9544	25.996	26.5126	23.775
CLSTN3	0.929014	3.38278e-63	2.29831e-62	None	10.5127	5.89811	1.78238	chr12	7282294	7311541	+	ENSG00000139182.9	5.99315	5.80352	5.89765	10.1605	10.665	10.7125
ANXA3	-0.868742	3.53944e-63	2.40205e-62	None	18.0586	34.5309	0.522969	chr4	79472673	79531597	+	ENSG00000138772.8	35.3229	35.0445	33.2255	18.9085	19.2307	16.0366
DMPK	1.01193	3.77347e-63	2.558e-62	Up	22.0255	11.5409	1.90847	chr19	46272975	46285810	-	ENSG00000104936.13	10.8714	11.1775	12.5738	21.8593	21.46	22.7571
IL10RB	1.26157	4.53146e-63	3.06839e-62	Up	10.2142	5.01245	2.03776	chr21	34638663	34669539	+	ENSG00000243646.4	4.5999	5.09161	5.34584	10.0659	10.6	9.97656
TC2N	0.839945	5.025e-63	3.39877e-62	None	15.7531	9.94664	1.58376	chr14	92246095	92333880	-	ENSG00000165929.8	10.5317	9.21644	10.0918	15.3478	16.9263	14.9852
ZC3H11A	0.559195	6.7967e-63	4.59196e-62	None	70.9973	54.2686	1.30826	chr1	203764782	203823252	+	ENSG00000058673.11	53.2575	54.2044	55.344	73.5992	70.0006	69.3921
EVPL	0.642331	9.56538e-63	6.4553e-62	None	14.0388	9.71827	1.44458	chr17	74000583	74023533	-	ENSG00000167880.3	9.4313	9.76385	9.95967	13.9891	14.1829	13.9446
TTC14	0.745216	1.38589e-62	9.3424e-62	None	17.9481	11.7403	1.52876	chr3	180319918	180335616	+	ENSG00000163728.6	12.1074	11.49	11.6235	18.4189	17.957	17.4684
CIRBP	0.683056	1.53316e-62	1.03236e-61	None	54.391	36.4311	1.49298	chr19	1259384	1274879	+	ENSG00000099622.9	35.4953	37.3765	36.4216	53.5203	56.8898	52.7628
NABP1	0.636677	1.58278e-62	1.06458e-61	None	55.5235	44.0373	1.26083	chr2	192542794	192561385	+	ENSG00000173559.8	45.1588	43.4277	43.5256	57.9399	55.4609	53.1697
ETV6	0.735418	1.84651e-62	1.24059e-61	None	11.8243	7.2405	1.63309	chr12	11802788	12048336	+	ENSG00000139083.6	7.29246	7.09015	7.33888	11.4985	12.2291	11.7454
EML2	0.90046	2.10756e-62	1.4144e-61	None	20.2285	11.745	1.7223	chr19	46110252	46148887	-	ENSG00000125746.10	11.1751	11.5018	12.5581	20.1937	22.3266	18.1651
WBP1L	0.682983	2.43848e-62	1.63468e-61	None	15.8447	10.659	1.48651	chr10	104503727	104576021	+	ENSG00000166272.12	10.4694	10.6785	10.8289	16.304	16.184	15.046
FAM210A	-0.81312	2.54685e-62	1.70543e-61	None	9.4995	17.8317	0.53273	chr18	13663346	13726662	-	ENSG00000177150.8	17.3025	18.2055	17.9872	8.97148	11.4474	8.07959
MAP2K3	-0.711189	3.29297e-62	2.20261e-61	None	24.3367	41.2637	0.589784	chr17	21187984	21218552	+	ENSG00000034152.14	38.6061	41.2695	43.9154	23.6406	24.87	24.4994
HMOX2	-0.833317	4.41209e-62	2.9479e-61	None	12.3229	24.2453	0.508261	chr16	4524691	4560348	+	ENSG00000103415.7	24.5234	23.5153	24.6972	13.2146	12.8507	10.9034
MYBL2	-0.592547	5.69244e-62	3.79915e-61	None	50.5521	82.3611	0.613786	chr20	42295754	42345136	+	ENSG00000101057.11	79.0755	84.8462	83.1618	50.4626	51.9152	49.2785
KIAA0040	0.712039	6.06062e-62	4.04041e-61	None	15.1051	9.99343	1.5115	chr1	175126123	175162135	-	ENSG00000235750.5	9.97069	10.2852	9.72439	14.8824	15.1461	15.2867
PWP2	-0.860067	7.37138e-62	4.90883e-61	None	5.98963	11.7637	0.50916	chr21	45527171	45551063	+	ENSG00000241945.3	11.7654	11.8037	11.7221	5.85031	6.33469	5.78388
TNPO1	-0.552915	9.71153e-62	6.46009e-61	None	28.7	53.1787	0.53969	chr5	72112139	72212560	+	ENSG00000083312.13	70.0606	39.6299	49.8457	43.2286	19.9474	22.9241
AMFR	0.552236	1.47505e-61	9.80121e-61	None	59.5468	43.9915	1.3536	chr16	56395364	56459450	-	ENSG00000159461.10	43.7698	44.361	43.8436	62.0756	58.1543	58.4106
MBTD1	0.810413	1.88738e-61	1.25272e-60	None	13.1465	8.33533	1.5772	chr17	49254786	49337524	-	ENSG00000011258.11	8.72902	8.1974	8.07956	12.8777	13.1774	13.3844
GOT2	-0.541921	2.15178e-61	1.42665e-60	None	50.091	79.1399	0.632943	chr16	58741035	58768261	-	ENSG00000125166.8	79.4775	79.3229	78.6193	49.5159	51.0608	49.6964
CDC42BPG	0.883457	2.21368e-61	1.46608e-60	None	10.1874	5.72758	1.77865	chr11	64590859	64612041	-	ENSG00000171219.8	5.37463	5.8633	5.94482	10.5222	9.66262	10.3773
ZMYND19	-0.91344	2.83752e-61	1.87718e-60	None	15.0235	30.5542	0.491702	chr9	140476531	140484942	-	ENSG00000165724.5	29.7276	31.1704	30.7645	16.1548	15.2099	13.7059
ZER1	0.787244	3.07785e-61	2.03394e-60	None	22.7463	14.5097	1.56767	chr9	131492065	131534693	-	ENSG00000160445.6	13.5654	14.9542	15.0094	22.2658	22.6673	23.3059
SKA3	-0.888093	3.70623e-61	2.44652e-60	None	6.85982	14.0638	0.487765	chr13	21727734	21750741	-	ENSG00000165480.11	15.034	13.8299	13.3275	7.27462	6.94235	6.36249
XPO4	-0.599167	3.91867e-61	2.58392e-60	None	8.64523	15.0117	0.575901	chr13	21351469	21477187	-	ENSG00000132953.12	15.4389	14.4007	15.1954	8.7395	8.7807	8.41551
DDR1	1.05393	4.22141e-61	2.78052e-60	Up	12.4179	6.68187	1.85844	chr6	30844198	30867933	+	ENSG00000204580.7	6.44905	6.51955	7.07699	12.6653	10.704	13.8843
FTSJ3	-0.729071	4.42821e-61	2.91355e-60	None	11.1545	19.3989	0.575006	chr17	61896793	61907372	-	ENSG00000108592.12	19.0826	19.2404	19.8738	10.9472	11.3697	11.1466
SRSF7	-0.661384	5.59037e-61	3.67419e-60	None	41.916	72.2498	0.580153	chr2	38970741	38978636	-	ENSG00000115875.14	73.7019	73.2521	69.7955	43.544	44.5147	37.6892
WDR4	-1.08636	6.24533e-61	4.10019e-60	Down	5.75477	13.1155	0.438775	chr21	44263204	44299678	-	ENSG00000160193.7	13.2123	12.6418	13.4924	5.93858	5.71378	5.61195
TMEM43	0.650479	6.64029e-61	4.35476e-60	None	25.2819	17.3945	1.45344	chr3	14166440	14185179	+	ENSG00000170876.7	17.6524	17.1709	17.3603	26.4964	25.7905	23.5589
STARD7	-0.56144	8.22098e-61	5.38555e-60	None	45.5777	72.5473	0.628248	chr2	96850597	96874563	-	ENSG00000084090.9	74.1674	72.0603	71.414	47.4985	46.4088	42.8258
HSD17B11	0.790194	1.53973e-60	1.00758e-59	None	30.9203	19.4083	1.59315	chr4	88257762	88312538	-	ENSG00000198189.6	19.4091	18.7316	20.0843	31.4557	32.4338	28.8715
DNMT1	-0.512274	1.73999e-60	1.1374e-59	None	32.8198	48.413	0.677913	chr19	10244021	10341962	-	ENSG00000130816.10	47.4746	49.11	48.6544	33.4752	32.3404	32.6438
MKRN1	0.617698	1.74927e-60	1.14223e-59	None	29.4276	20.8756	1.40966	chr7	140152840	140179369	-	ENSG00000133606.6	22.0199	20.7875	19.8193	28.4839	28.5937	31.2051
CERS6	0.603576	2.01418e-60	1.31378e-59	None	13.6933	9.74342	1.40539	chr2	169312372	169631644	+	ENSG00000172292.10	10.0021	9.68198	9.54616	13.8671	13.955	13.2577
MRPL15	-0.751363	2.26187e-60	1.47376e-59	None	36.3994	66.1024	0.550652	chr8	55047770	55060461	+	ENSG00000137547.4	68.69	66.8596	62.7577	37.5935	36.7646	34.8403
LAPTM4A	0.749064	2.64951e-60	1.72447e-59	None	132.007	84.7222	1.55811	chr2	20232411	20251789	-	ENSG00000068697.6	86.509	84.4036	83.2539	141.338	137.53	117.152
DNAJC11	-0.621336	2.85545e-60	1.85651e-59	None	20.0658	34.3271	0.584546	chr1	6694228	6761984	-	ENSG00000007923.11	32.6139	34.0252	36.3423	19.9133	19.9473	20.3367
PNPLA2	0.992379	2.97864e-60	1.93451e-59	None	16.7994	8.86013	1.89607	chr11	818902	825573	+	ENSG00000177666.11	8.35349	8.98256	9.24436	16.133	16.5335	17.7318
TCP11L1	0.903517	3.06294e-60	1.98712e-59	None	14.3949	8.33131	1.72781	chr11	33060963	33127489	+	ENSG00000176148.11	8.44009	8.30526	8.24859	13.6127	14.6815	14.8905
ISG20L2	-0.626917	3.56676e-60	2.3115e-59	None	21.94	35.8255	0.612413	chr1	156691683	156698591	-	ENSG00000143319.12	35.8549	35.2502	36.3712	22.2543	23.0844	20.4813
NIPSNAP1	0.690455	4.04371e-60	2.61779e-59	None	53.3147	35.7283	1.49223	chr22	29950797	29977326	-	ENSG00000184117.7	33.0207	37.5603	36.6038	55.3953	53.5611	50.9877
LETMD1	0.734243	4.99086e-60	3.2275e-59	None	43.6589	29.4774	1.4811	chr12	51441745	51454207	+	ENSG00000050426.11	28.8557	31.5199	28.0566	43.3315	46.4842	41.1612
LRR1	-1.15	5.2698e-60	3.40423e-59	Down	6.63708	17.1289	0.387478	chr14	50065415	50081390	+	ENSG00000165501.12	17.865	17.7449	15.7769	6.26459	6.99478	6.65185
ZMYM3	0.731332	5.93271e-60	3.82837e-59	None	15.2257	9.94521	1.53096	chrX	70459474	70474996	-	ENSG00000147130.10	9.54173	9.96595	10.328	15.5863	15.1066	14.9843
AIF1L	0.642411	6.30314e-60	4.06307e-59	None	35.1213	24.2571	1.44788	chr9	133971863	133998539	+	ENSG00000126878.8	22.8672	24.6982	25.2058	35.0298	35.9583	34.3757
SNX1	0.68278	6.50671e-60	4.18982e-59	None	28.3524	20.682	1.37088	chr15	64386322	64438289	+	ENSG00000028528.10	18.1414	23.6181	20.2864	30.3261	29.5706	25.1606
DBF4	-0.822615	9.49546e-60	6.10783e-59	None	10.8882	20.0616	0.542739	chr7	87505531	87538856	+	ENSG00000006634.3	20.991	19.6312	19.5625	11.0286	11.0632	10.5729
PRMT3	-0.858295	1.53842e-59	9.88518e-59	None	7.12549	14.3178	0.497668	chr11	20409076	20530840	+	ENSG00000185238.8	14.6166	14.0897	14.247	7.23343	7.53105	6.612
GNPNAT1	-0.757375	1.58609e-59	1.01806e-58	None	17.2315	31.9322	0.539627	chr14	53241912	53258386	-	ENSG00000100522.4	33.7549	30.1567	31.8849	18.1071	17.7671	15.8202
PMS1	-0.866008	1.65286e-59	1.0598e-58	None	14.2134	28.2996	0.502249	chr2	190649107	190742355	+	ENSG00000064933.12	31.2846	28.7516	24.8626	14.1389	13.6163	14.8852
PSME1	0.823359	1.67433e-59	1.07242e-58	None	40.9162	24.6016	1.66315	chr14	24605367	24608176	+	ENSG00000092010.10	23.8723	24.8438	25.0887	44.3469	39.3433	39.0583
LMNB2	-0.575202	3.07964e-59	1.97045e-58	None	34.9671	56.4339	0.619613	chr19	2427636	2456994	-	ENSG00000176619.6	54.0143	57.4594	57.8279	35.8468	36.0361	33.0185
E2F3	-0.710388	3.10185e-59	1.98256e-58	None	10.3402	18.1479	0.569772	chr6	20402398	20493941	+	ENSG00000112242.10	19.1266	17.2416	18.0755	10.3574	10.5847	10.0784
UBE2C	-0.691506	3.52637e-59	2.25151e-58	None	43.2134	76.6269	0.563945	chr20	44441215	44445596	+	ENSG00000175063.12	74.6753	76.3748	78.8307	45.1156	44.6298	39.8948
KIAA0195	0.866451	3.55734e-59	2.26889e-58	None	11.739	7.0126	1.67398	chr17	73437240	73496171	+	ENSG00000177728.10	6.94955	6.85473	7.23352	12.4923	10.9549	11.7698
POMP	-0.722668	3.80514e-59	2.42437e-58	None	24.7694	44.1779	0.560674	chr13	29233241	29253062	+	ENSG00000132963.7	44.6977	43.3064	44.5295	25.7266	24.8553	23.7263
NF1	0.589133	4.01329e-59	2.5543e-58	None	47.489	32.7863	1.44844	chr17	29421945	29709134	+	ENSG00000196712.12	32.9174	32.1455	33.2959	45.8396	46.927	49.7004
ADIRF	1.83625	4.75098e-59	3.02062e-58	Up	16.5486	4.60535	3.59333	chr10	88727949	88743691	+	ENSG00000148671.9	4.92246	4.73006	4.16354	20.2726	12.1672	17.2058
VWA1	0.984862	5.36511e-59	3.4075e-58	None	10.2063	5.73511	1.77962	chr1	1370241	1378262	+	ENSG00000179403.10	5.53025	5.7957	5.87937	9.71641	9.92642	10.9762
NF2	-0.593525	6.62902e-59	4.20581e-58	None	43.4795	65.9937	0.658843	chr22	29999545	30094587	+	ENSG00000186575.13	66.175	67.0268	64.7791	41.5711	42.6023	46.265
CYTH1	0.843204	7.43324e-59	4.7111e-58	None	14.0863	8.53094	1.6512	chr17	76670130	76778379	-	ENSG00000108669.12	9.48861	8.2842	7.82001	13.4921	15.8097	12.9571
KARS	-0.539618	8.55963e-59	5.41931e-58	None	60.2896	96.8933	0.622227	chr16	75661622	75682541	-	ENSG00000065427.10	98.4187	96.7509	95.5103	62.3954	63.4725	55.0008
SNRPD1	-0.925284	1.00167e-58	6.33516e-58	None	11.9111	24.6125	0.483947	chr18	19192228	19210417	+	ENSG00000167088.6	25.1571	24.7111	23.9692	12.8887	12.2416	10.6031
HK1	0.636185	1.09187e-58	6.89846e-58	None	22.4057	15.5743	1.43864	chr10	71029740	71161638	+	ENSG00000156515.17	15.2898	15.373	16.06	22.7928	22.4811	21.9433
BSDC1	0.65477	1.33349e-58	8.41616e-58	None	23.6066	16.1864	1.45843	chr1	32830704	32860332	-	ENSG00000160058.14	15.8214	16.5441	16.1935	24.02	23.4851	23.3148
CAPNS1	0.485878	1.75684e-58	1.10765e-57	None	218.032	167.734	1.29987	chr19	36630477	36641255	+	ENSG00000126247.6	165.584	169.563	168.055	206.087	238.488	209.522
AHCTF1	-0.643581	2.18072e-58	1.37347e-57	None	19.3322	30.8281	0.627099	chr1	247002400	247095280	-	ENSG00000153207.10	32.8493	30.7105	28.9243	19.0832	21.1382	17.7754
PSMB3	-0.635628	2.42281e-58	1.52435e-57	None	104.353	176.965	0.58968	chr17	36908989	36920484	+	ENSG00000108294.4	179.543	175.831	175.522	107.993	109.119	95.947
FABP5	-1.8043	2.64054e-58	1.65961e-57	Down	3.03727	11.5106	0.263867	chr8	82192598	82197012	+	ENSG00000164687.6	11.5151	12.0962	10.9204	2.971	3.48889	2.65191
NCOA3	0.561655	3.17667e-58	1.9945e-57	None	26.0112	18.6696	1.39324	chr20	46130601	46285621	+	ENSG00000124151.14	17.4277	17.7869	20.7942	25.0114	30.6168	22.4055
ITFG3	0.888699	4.0188e-58	2.52062e-57	None	16.3592	9.76738	1.67488	chr16	284545	319942	+	ENSG00000167930.11	9.26109	9.23299	10.8081	16.1695	15.9602	16.948
FAM98A	-0.727644	4.45321e-58	2.79018e-57	None	14.7947	26.5029	0.558227	chr2	33808725	33824449	-	ENSG00000119812.14	27.355	25.9361	26.2177	14.6671	15.0726	14.6443
ARNT	0.60373	4.69526e-58	2.93879e-57	None	19.3905	13.8717	1.39784	chr1	150782181	150849244	-	ENSG00000143437.16	12.7344	15.1094	13.7714	20.1409	20.5125	17.5181
ADAM17	0.60322	5.03259e-58	3.14667e-57	None	24.0097	16.9193	1.41908	chr2	9628615	9695921	-	ENSG00000151694.8	17.4443	16.7209	16.5926	24.5029	24.3147	23.2115
MED12	0.668362	5.43092e-58	3.39222e-57	None	15.4236	10.4997	1.46895	chrX	70338406	70362303	+	ENSG00000184634.11	10.726	9.96195	10.8112	15.303	15.4422	15.5255
EIF2B3	-1.11427	7.37013e-58	4.59872e-57	Down	9.13531	20.5476	0.444593	chr1	45316450	45452282	-	ENSG00000070785.12	20.8536	20.9995	19.7897	9.27374	9.94988	8.1823
SRPRB	-0.726269	7.97886e-58	4.97341e-57	None	12.0679	21.4984	0.561338	chr3	133502877	133544616	+	ENSG00000144867.7	21.945	21.3759	21.1744	12.33	11.8882	11.9854
MAGEA6	-0.712934	8.44661e-58	5.25954e-57	None	19.0004	34.7119	0.547375	chrX	151867214	151870825	+	ENSG00000197172.6	33.6197	35.8275	34.6886	18.7859	19.86	18.3554
ZNF217	0.573642	1.26132e-57	7.84593e-57	None	35.5836	25.5713	1.39155	chr20	52183604	52226446	-	ENSG00000171940.9	25.8599	26.3902	24.4638	34.6552	36.7416	35.3541
CDCA5	-0.607121	1.32873e-57	8.25671e-57	None	23.4974	39.2009	0.599409	chr11	64833772	64851636	-	ENSG00000146670.5	38.6327	39.2233	39.7468	23.8829	23.5816	23.0277
TIA1	0.606435	1.63301e-57	1.01371e-56	None	51.6274	32.3449	1.59615	chr2	70436576	70475792	-	ENSG00000116001.11	33.2064	32.9538	30.8744	52.1846	52.3426	50.355
MYO1B	-0.483434	1.91848e-57	1.18969e-56	None	57.338	86.4377	0.663345	chr2	192109911	192290115	+	ENSG00000128641.13	90.1793	85.6434	83.4904	59.5586	58.4926	53.9629
VGLL4	0.798512	2.12557e-57	1.31676e-56	None	14.2281	8.62263	1.65008	chr3	11597544	11762220	-	ENSG00000144560.9	8.22216	8.98884	8.65689	14.3276	14.291	14.0657
PMPCA	-0.615183	2.51329e-57	1.55536e-56	None	29.4624	49.06	0.600538	chr9	139305110	139318213	+	ENSG00000165688.7	48.9973	49.8991	48.2837	30.872	29.224	28.2912
ADI1	-0.640879	2.71389e-57	1.67778e-56	None	21.2814	37.2841	0.570792	chr2	3501132	3523507	-	ENSG00000182551.9	37.5296	37.4296	36.893	22.2791	21.8461	19.7191
IGF2R	0.543235	3.10899e-57	1.92007e-56	None	19.2993	14.1359	1.36527	chr6	160390131	160534539	+	ENSG00000197081.8	13.569	14.3965	14.4421	19.6979	19.37	18.8301
CACYBP	-0.79769	3.36039e-57	2.07321e-56	None	12.1895	23.2215	0.524924	chr1	174968300	174980851	+	ENSG00000116161.13	23.7671	22.9171	22.9802	13.3971	11.842	11.3295
PPT1	0.480958	3.56208e-57	2.19541e-56	None	104.731	77.5586	1.35035	chr1	40538379	40563375	-	ENSG00000131238.12	77.2817	77.0074	78.3867	116.171	100.639	97.3845
MKI67IP	-1.0293	4.0808e-57	2.51254e-56	Down	8.3373	18.7423	0.444838	chr2	122484521	122494499	-	ENSG00000155438.7	20.479	18.0981	17.6499	8.64609	8.76463	7.60118
PHYKPL	0.866568	4.60795e-57	2.83421e-56	None	38.6148	24.1147	1.6013	chr5	177635498	177659792	-	ENSG00000175309.10	21.9307	25.0174	25.3961	38.0972	39.5859	38.1614
CDS2	0.593195	4.79373e-57	2.94549e-56	None	14.2412	10.1433	1.40401	chr20	5107432	5178533	+	ENSG00000101290.9	9.6537	10.0714	10.7048	14.587	14.2727	13.864
TRMT6	-1.00742	4.81308e-57	2.95437e-56	Down	4.83152	11.376	0.424712	chr20	5917881	5931182	-	ENSG00000089195.10	11.9251	10.5336	11.6692	4.63599	4.82197	5.0366
HS2ST1	0.602004	5.46216e-57	3.34939e-56	None	22.1131	15.3571	1.43992	chr1	87380331	87602334	+	ENSG00000153936.12	15.5289	14.9132	15.6293	23.1159	22.2273	20.996
CD46	0.534632	5.75158e-57	3.52328e-56	None	82.9703	64.1177	1.29403	chr1	207925402	207968858	+	ENSG00000117335.14	64.5389	61.3793	66.4351	87.431	85.9465	75.5333
B4GALT1	0.583668	5.78378e-57	3.53941e-56	None	27.588	19.9102	1.38562	chr9	33104080	33167354	-	ENSG00000086062.8	19.7456	19.4884	20.4968	27.9675	27.6909	27.1055
PLEKHA5	0.757958	6.26826e-57	3.83201e-56	None	14.3363	8.50364	1.6859	chr12	19282648	19529334	+	ENSG00000052126.10	8.52286	8.67617	8.31188	13.4356	14.454	15.1194
DHCR7	-0.587384	6.51684e-57	3.97995e-56	None	146.739	245.453	0.597832	chr11	71139239	71163914	-	ENSG00000172893.11	235.435	245.086	255.836	142.522	149.492	148.204
DNAJC9	-1.02212	6.652e-57	4.05839e-56	Down	8.10257	16.9903	0.476893	chr10	74943120	75008620	-	ENSG00000213551.4	17.4429	17.4351	16.0929	8.4904	8.46745	7.34987
CABLES1	0.892745	6.78697e-57	4.13656e-56	None	10.2274	5.49761	1.86033	chr18	20714528	20840431	+	ENSG00000134508.8	5.47924	5.74356	5.27003	9.63448	9.74619	11.3014
CHUK	-0.907326	8.49557e-57	5.17271e-56	None	5.27934	10.7195	0.4925	chr10	101948055	101989376	-	ENSG00000213341.6	11.1184	10.5349	10.5051	5.37053	5.48815	4.97935
RCOR3	0.705351	9.72454e-57	5.91503e-56	None	20.3057	14.9221	1.36078	chr1	211431719	211489727	+	ENSG00000117625.9	15.813	14.7056	14.2478	19.8693	19.8241	21.2238
PRDX3	-0.603289	1.0466e-56	6.35964e-56	None	39.527	64.9616	0.608468	chr10	120927215	120938345	-	ENSG00000165672.5	65.6219	64.7324	64.5305	39.2635	41.6032	37.7145
EIF4E	-0.830582	1.15751e-56	7.02652e-56	None	7.47348	23.8177	0.313779	chr4	99792835	99851788	-	ENSG00000151247.8	23.571	26.6754	21.2066	8.25343	6.85663	7.31039
LPP	0.643369	1.23972e-56	7.51798e-56	None	35.6462	24.0372	1.48296	chr3	187871072	188608460	+	ENSG00000145012.8	24.7165	23.3402	24.0551	34.1825	34.2523	38.5038
C3orf52	0.873714	1.61214e-56	9.76661e-56	None	10.3136	6.43831	1.60191	chr3	111805182	111849851	+	ENSG00000114529.8	6.5502	6.35974	6.40498	10.1422	10.9745	9.82402
ZFYVE16	0.592588	2.18408e-56	1.32183e-55	None	17.5336	11.9237	1.47048	chr5	79703832	79775169	+	ENSG00000039319.12	12.0804	11.4212	12.2695	16.9171	17.6144	18.0692
TUBA4A	-0.673132	2.4397e-56	1.47506e-55	None	41.734	72.339	0.576922	chr2	220114433	220142892	-	ENSG00000127824.9	73.02	73.8452	70.1518	43.37	44.4123	37.4196
EIF3CL	-0.573202	3.50832e-56	2.11903e-55	None	34.6403	55.8559	0.620173	chr16	28390900	28415200	-	ENSG00000205609.8	55.6831	57.1258	54.7588	34.7627	34.4323	34.7259
ERH	-0.71568	4.00068e-56	2.414e-55	None	56.6285	99.5631	0.56877	chr14	69846848	69865344	-	ENSG00000100632.6	102.656	99.1496	96.8834	61.0565	58.2874	50.5415
PSMB2	-0.601453	6.46614e-56	3.89776e-55	None	42.9694	70.4567	0.609869	chr1	36067185	36107445	-	ENSG00000126067.7	68.2503	73.9638	69.1559	42.3968	44.3057	42.2055
HDGF	-0.484276	7.32043e-56	4.40832e-55	None	189.074	283.582	0.666734	chr1	156711899	156736717	-	ENSG00000143321.14	280.379	281.969	288.398	194.849	196.637	175.735
SNRNP40	-0.585236	7.94281e-56	4.77834e-55	None	41.092	66.1954	0.620769	chr1	31732417	31769662	-	ENSG00000060688.8	66.0923	66.7519	65.742	42.2205	40.5442	40.5113
BROX	0.551567	8.29984e-56	4.98816e-55	None	37.0183	24.7208	1.49745	chr1	222885895	222908538	+	ENSG00000162819.7	25.3234	24.4572	24.3819	34.0179	39.3862	37.6506
SFXN1	-0.532042	8.58648e-56	5.1553e-55	None	29.5761	43.9306	0.673246	chr5	174904065	174956745	+	ENSG00000164466.8	43.2218	42.9047	45.6653	28.7733	30.8106	29.1444
ACSS2	0.81164	9.02371e-56	5.41244e-55	None	15.5871	9.39001	1.65997	chr20	33459949	33515769	+	ENSG00000131069.15	9.08158	9.06897	10.0195	15.3548	15.8207	15.5858
DCAF11	0.875136	9.12159e-56	5.46571e-55	None	17.5735	11.4314	1.53729	chr14	24583404	24594451	+	ENSG00000100897.13	10.7625	11.6627	11.869	18.6118	19.1129	14.9957
ZBTB4	0.718427	9.49337e-56	5.68285e-55	None	11.1468	7.30659	1.52558	chr17	7362685	7387582	-	ENSG00000174282.7	7.12259	7.2771	7.52009	10.8829	11.2297	11.3279
EXOC4	0.698584	1.00873e-55	6.03241e-55	None	17.1728	11.379	1.50917	chr7	132937829	133751342	+	ENSG00000131558.10	11.3116	11.6726	11.1527	16.2037	17.3391	17.9755
CYCS	-1.6207	1.13363e-55	6.77263e-55	Down	12.8608	42.4927	0.302659	chr7	25159710	25164980	-	ENSG00000172115.4	44.782	41.392	41.3042	14.1206	13.591	10.8708
FAM134A	0.617105	1.13489e-55	6.77343e-55	None	26.5128	19.5459	1.35644	chr2	220040947	220050201	+	ENSG00000144567.6	19.8295	19.0541	19.754	27.0845	27.8734	24.5805
HADHB	0.529274	1.13864e-55	6.78913e-55	None	58.1952	43.112	1.34986	chr2	26466038	26513336	+	ENSG00000138029.9	41.7342	43.9197	43.6823	59.0158	63.2384	52.3313
KCNK1	0.720131	1.85186e-55	1.10308e-54	None	25.8138	16.3211	1.58162	chr1	233749750	233808258	+	ENSG00000135750.10	15.8211	16.9259	16.2162	26.2567	25.6297	25.5549
TFDP1	-0.602649	1.86961e-55	1.11256e-54	None	32.9733	54.16	0.608812	chr13	114239013	114295785	+	ENSG00000198176.8	54.3485	56.2752	51.8563	32.9415	32.8098	33.1685
GNL2	-0.710262	2.13359e-55	1.26839e-54	None	19.3796	32.9682	0.587828	chr1	38032417	38061536	-	ENSG00000134697.8	33.506	33.1271	32.2714	19.8721	19.3866	18.8801
IRF2BPL	0.786998	2.68725e-55	1.59597e-54	None	12.3311	7.71682	1.59795	chr14	77490888	77495034	-	ENSG00000119669.3	7.48583	7.42879	8.23583	12.4525	12.4859	12.055
GSPT1	-0.640409	3.0816e-55	1.82837e-54	None	18.0416	31.9828	0.564103	chr16	11961985	12009939	-	ENSG00000103342.8	32.9496	33.727	29.2717	19.0308	17.2835	17.8104
ATAD3A	-1.19263	3.14892e-55	1.86648e-54	Down	5.31307	13.4127	0.396123	chr1	1447531	1470067	+	ENSG00000197785.9	12.4769	14.7123	13.0487	4.77634	5.86892	5.29396
ACAD10	0.95772	3.45549e-55	2.04619e-54	None	12.1795	6.67277	1.82526	chr12	112123857	112194903	+	ENSG00000111271.10	6.43715	6.74216	6.83901	11.8072	11.6692	13.0621
VDAC1	-0.619098	3.90103e-55	2.30776e-54	None	85.8917	141.72	0.606066	chr5	133307606	133340824	-	ENSG00000213585.6	146.981	141.471	136.708	89.8789	87.8248	79.9714
NUP88	-0.657217	4.14728e-55	2.45103e-54	None	16.256	27.8576	0.583538	chr17	5264258	5323480	-	ENSG00000108559.7	28.3406	27.8783	27.3539	16.4486	15.8711	16.4482
ACTN1	-0.555046	4.15361e-55	2.45238e-54	None	38.6459	57.947	0.666918	chr14	69340860	69446157	-	ENSG00000072110.9	56.6975	57.8354	59.3083	37.566	38.9415	39.4303
OTUD6B	-0.917769	4.73403e-55	2.79234e-54	None	6.34751	12.1889	0.520761	chr8	92082424	92099323	+	ENSG00000155100.6	13.0422	11.6173	11.9071	6.48342	6.66531	5.89378
ALKBH5	-0.4651	5.11141e-55	3.01199e-54	None	80.8601	120.56	0.670706	chr17	18086392	18113268	+	ENSG00000091542.8	117.625	122.497	121.558	82.0652	82.4853	78.0299
ORMDL3	0.761258	5.8253e-55	3.42932e-54	None	20.0489	12.7496	1.57251	chr17	38077294	38083854	-	ENSG00000172057.5	12.5813	12.7529	12.9146	20.5966	20.7374	18.8127
HNRNPM	-0.544377	5.87984e-55	3.45805e-54	None	55.7191	84.4169	0.660047	chr19	8509651	8553998	+	ENSG00000099783.7	82.6259	85.338	85.2868	58.8802	55.5362	52.741
ZNF367	-0.736318	6.25536e-55	3.67533e-54	None	7.69118	13.8517	0.555252	chr9	99148223	99180611	-	ENSG00000165244.6	14.2431	13.8251	13.4869	7.7287	7.86055	7.4843
BRAF	0.698213	6.63668e-55	3.89558e-54	None	15.385	10.1447	1.51655	chr7	140419127	140624564	-	ENSG00000157764.8	10.5058	9.83779	10.0905	14.9411	15.3308	15.8831
CLK4	0.795526	7.69098e-55	4.51005e-54	None	18.4504	11.1644	1.65261	chr5	178029665	178057616	-	ENSG00000113240.8	12.0173	10.4983	10.9775	18.7782	19.2551	17.3178
BTBD2	0.771966	7.94887e-55	4.65676e-54	None	43.8896	27.9212	1.57191	chr19	1985447	2034880	-	ENSG00000133243.4	26.0545	29.0379	28.6712	42.4559	43.9586	45.2544
PDPR	0.64745	9.3478e-55	5.471e-54	None	11.6355	8.78445	1.32455	chr16	70147529	70195203	+	ENSG00000090857.9	9.03324	8.10465	9.21547	11.9506	11.4721	11.4837
ARIH2	-0.589027	9.47098e-55	5.53773e-54	None	20.3434	31.5057	0.645704	chr3	48956254	49023815	+	ENSG00000177479.15	33.0165	34.7738	26.7268	20.085	19.8336	21.1115
ABLIM1	0.519167	9.51706e-55	5.55929e-54	None	40.8986	30.8069	1.32758	chr10	116190872	116444762	-	ENSG00000099204.14	30.201	31.0371	31.1825	40.9715	42.3278	39.3966
ARNTL2	-0.965623	1.05862e-54	6.17783e-54	None	7.50302	12.8803	0.582519	chr12	27485787	27576241	+	ENSG00000029153.10	18.1036	9.55099	10.9862	8.78881	6.4437	7.27654
ARHGAP11A	-0.565478	1.07289e-54	6.25506e-54	None	13.5387	19.4412	0.696393	chr15	32907345	32932150	+	ENSG00000198826.6	19.114	19.4053	19.8042	12.8277	14.4566	13.3318
UTP6	-0.822632	1.10423e-54	6.43159e-54	None	6.41356	11.3577	0.564686	chr17	30187923	30228784	-	ENSG00000108651.5	11.4664	11.4042	11.2026	6.58632	6.34596	6.30839
SLC3A2	-0.612871	1.11734e-54	6.50166e-54	None	36.2111	55.4863	0.652613	chr11	62623518	62656352	+	ENSG00000168003.12	55.1806	55.927	55.3512	38.0176	36.9509	33.6647
TARS	-0.546729	1.22058e-54	7.0956e-54	None	40.1445	61.3971	0.65385	chr5	33440802	33469644	+	ENSG00000113407.9	58.8328	64.9542	60.4042	38.1484	39.8064	42.4785
TMEM201	-0.905364	1.38866e-54	8.0649e-54	None	5.77836	11.1241	0.519447	chr1	9648932	9674935	+	ENSG00000188807.8	11.0786	11.1652	11.1283	5.86193	5.5954	5.87775
TOMM22	-0.718014	1.49111e-54	8.65159e-54	None	25.0162	42.6411	0.586668	chr22	39077953	39080818	+	ENSG00000100216.4	44.3395	42.2309	41.353	23.8198	27.8832	23.3455
HIST1H2BM	-0.900766	2.18276e-54	1.26525e-53	None	46.262	93.3572	0.495538	chr6	27782822	27783267	+	ENSG00000196374.5	88.5095	100.566	90.9966	47.1751	46.0945	45.5165
SNRPF	-0.971716	2.70146e-54	1.56441e-53	None	14.062	29.1753	0.481985	chr12	96252706	96297606	+	ENSG00000139343.6	30.7031	28.3239	28.4987	15.4373	13.7525	12.9963
DUS3L	-1.03744	2.82091e-54	1.63202e-53	Down	5.27465	11.4492	0.4607	chr19	5784843	5791249	-	ENSG00000141994.11	11.3137	11.6762	11.3577	4.84335	5.30823	5.67236
ALPP	1.14089	2.83881e-54	1.6408e-53	Up	16.7985	8.25646	2.03459	chr2	233243244	233247599	+	ENSG00000163283.6	7.02768	8.27163	9.47008	17.0859	16.9747	16.335
PTPN14	0.582476	3.25671e-54	1.88055e-53	None	29.4782	21.193	1.39094	chr1	214522039	214725792	-	ENSG00000152104.7	20.977	21.3248	21.2772	29.2747	28.6806	30.4791
UBE4B	0.598512	3.50522e-54	2.02211e-53	None	31.9292	22.7353	1.40439	chr1	10092890	10241297	+	ENSG00000130939.14	22.3231	23.2554	22.6274	31.3307	31.4935	32.9636
ZKSCAN8	0.547095	3.52103e-54	2.0293e-53	None	14.0298	10.3393	1.35694	chr6	28109688	28127250	+	ENSG00000198315.6	10.2629	10.2679	10.4871	14.2198	14.1419	13.7277
NPM3	-0.892796	4.12399e-54	2.37454e-53	None	18.6727	37.4783	0.498227	chr10	103541082	103543170	-	ENSG00000107833.6	37.1904	37.9655	37.279	19.6275	18.4354	17.9552
TRPS1	0.621373	4.57634e-54	2.63248e-53	None	21.0449	13.8023	1.52474	chr8	116420724	116821899	-	ENSG00000104447.7	13.9125	13.6757	13.8186	20.6644	21.1518	21.3184
ALAD	0.855349	5.11369e-54	2.93879e-53	None	14.8301	8.47454	1.74996	chr9	116148597	116163613	-	ENSG00000148218.11	8.58316	7.72415	9.11631	14.8422	14.3163	15.3318
PKMYT1	-0.964923	5.17659e-54	2.97211e-53	None	8.81654	18.6525	0.472675	chr16	3018025	3030540	-	ENSG00000127564.12	16.8006	19.4674	19.6894	8.49406	9.01223	8.94334
SLC9A3R1	0.683903	5.4636e-54	3.13392e-53	None	47.2932	31.6836	1.49267	chr17	72744791	72765492	+	ENSG00000109062.5	30.4578	32.7289	31.8641	48.8958	46.7896	46.1943
GNAQ	0.637312	6.89772e-54	3.95277e-53	None	19.2867	13.393	1.44005	chr9	80331003	80646374	-	ENSG00000156052.6	14.0082	12.8806	13.2903	19.8487	20.0201	17.9912
HIST1H2BC	-0.470264	7.84491e-54	4.4913e-53	None	313.726	452.878	0.692737	chr6	26115101	26124154	-	ENSG00000180596.7	437.55	438.189	482.896	323.504	309.21	308.463
NOP14	-0.880873	7.90098e-54	4.51912e-53	None	5.48125	10.8844	0.503586	chr4	2939660	2965112	-	ENSG00000087269.11	10.9116	11.4068	10.3349	5.43045	5.78451	5.22878
FUT3	1.0623	8.19458e-54	4.68262e-53	Up	12.5759	6.27368	2.00455	chr19	5842899	5851485	-	ENSG00000171124.8	5.84444	6.12703	6.84956	11.3831	14.1026	12.242
BCL2L11	0.795048	9.85783e-54	5.62772e-53	None	11.6982	6.86567	1.70387	chr2	111876955	111926024	+	ENSG00000153094.17	6.90156	6.92499	6.77046	12.0332	11.7299	11.3316
TUBB6	-0.746476	1.06775e-53	6.08989e-53	None	18.9819	31.9119	0.594822	chr18	12307668	12344319	+	ENSG00000176014.8	30.0554	32.6069	33.0734	19.0346	18.9258	18.9852
SEL1L	0.536929	1.21101e-53	6.90049e-53	None	17.8057	13.4696	1.32191	chr14	81937893	82000205	-	ENSG00000071537.9	13.9583	13.1985	13.2521	18.2552	18.0776	17.0841
RFX5	0.780466	1.4673e-53	8.35294e-53	None	13.3164	8.44796	1.57628	chr1	151313116	151319833	-	ENSG00000143390.13	7.72307	8.53625	9.08458	13.2002	13.5388	13.2101
EIF4G2	-0.481681	1.74748e-53	9.93857e-53	None	135.816	203.893	0.666113	chr11	10818597	10830657	-	ENSG00000110321.11	207.996	202.094	201.591	133.799	142.212	131.437
STAMBPL1	-0.890362	1.86846e-53	1.06167e-52	None	7.76639	14.9213	0.52049	chr10	90639491	90734910	+	ENSG00000138134.7	15.4045	13.7827	15.5767	7.67736	7.5727	8.04911
DLGAP4	0.97574	1.97255e-53	1.11975e-52	None	10.8688	6.09477	1.78331	chr20	34894258	35157040	+	ENSG00000080845.13	5.67795	6.29764	6.30872	10.5802	12.0161	10.0102
SPAG5	-0.569981	2.15717e-53	1.22341e-52	None	18.561	29.2678	0.634177	chr17	26904588	26926297	-	ENSG00000076382.12	28.8169	28.9056	30.0808	18.8256	19.1238	17.7335
ZMPSTE24	-0.724108	2.27051e-53	1.28648e-52	None	32.7424	57.8037	0.566441	chr1	40723779	40759856	+	ENSG00000084073.4	60.8379	55.3395	57.2338	35.1147	32.9213	30.1912
TAB2	0.489994	3.04963e-53	1.72632e-52	None	41.0522	31.2668	1.31296	chr6	149539777	149732749	+	ENSG00000055208.13	31.8005	30.7412	31.2586	41.5161	40.8881	40.7524
CDK4	-0.579892	3.26414e-53	1.84601e-52	None	46.1468	77.6457	0.594325	chr12	58141510	58149796	-	ENSG00000135446.12	74.7611	88.1247	70.0514	45.406	51.7369	41.2976
PGAM1	-0.506057	3.68534e-53	2.08227e-52	None	76.1575	117.085	0.650447	chr10	99185917	99193198	+	ENSG00000171314.8	115.918	119.417	115.92	76.6391	79.359	72.4745
POLD1	-0.627099	4.00245e-53	2.25932e-52	None	18.4799	30.7655	0.600671	chr19	50887461	50921273	+	ENSG00000062822.8	29.7278	30.6183	31.9503	18.1286	19.0496	18.2617
CD47	0.562799	4.59919e-53	2.59375e-52	None	22.3462	17.0263	1.31245	chr3	107762145	107809872	-	ENSG00000196776.10	17.2196	17.6014	16.2578	24.3343	21.7095	20.9949
CBX6	0.614414	4.62598e-53	2.60643e-52	None	36.6108	25.7933	1.41939	chr22	39257455	39268319	-	ENSG00000183741.7	24.8926	25.7929	26.6944	35.5321	36.7238	37.5766
BBX	0.537095	5.08073e-53	2.85998e-52	None	22.4148	15.8978	1.40993	chr3	107241783	107530171	+	ENSG00000114439.14	16.5154	15.7167	15.4614	23.0528	21.7776	22.4139
BCCIP	-0.784838	5.76658e-53	3.24303e-52	None	19.1099	37.6246	0.507911	chr10	127512115	127542264	+	ENSG00000107949.12	37.9117	38.4667	36.4955	19.7245	20.4336	17.1718
STK24	0.517965	6.15812e-53	3.46e-52	None	29.7749	22.1484	1.34433	chr13	99102455	99230194	-	ENSG00000102572.10	22.7344	21.5451	22.1659	29.0294	30.767	29.5284
TEAD4	-0.972357	7.62668e-53	4.28115e-52	None	8.65593	19.5216	0.443402	chr12	3068496	3149839	+	ENSG00000197905.4	19.3315	20.79	18.4434	8.88297	8.24982	8.83499
TMEM125	1.1324	7.95512e-53	4.46137e-52	Up	13.503	5.94173	2.27256	chr1	43735665	43739673	+	ENSG00000179178.6	6.13071	6.6536	5.04088	13.0317	14.1554	13.3218
SEMA7A	-0.837882	8.63872e-53	4.84025e-52	None	5.59324	10.6801	0.523706	chr15	74701630	74726808	-	ENSG00000138623.5	10.6543	10.7179	10.6682	5.74118	5.78497	5.25357
LMNB1	-0.541185	8.93098e-53	4.99936e-52	None	36.4026	57.4341	0.633815	chr5	126112315	126172712	+	ENSG00000113368.7	57.778	58.3937	56.1307	37.6433	37.4562	34.1082
TSC1	0.563207	8.95811e-53	5.00991e-52	None	25.0829	17.6174	1.42375	chr9	135766735	135820020	-	ENSG00000165699.9	17.0545	18.5155	17.2823	25.0234	24.8411	25.3841
RAB25	0.59224	9.30927e-53	5.20148e-52	None	108.443	83.2361	1.30283	chr1	156030951	156040295	+	ENSG00000132698.9	81.0583	86.2863	82.3637	110.102	110.47	104.756
MBNL2	0.602168	9.64698e-53	5.38519e-52	None	18.6227	12.9047	1.44309	chr13	97873688	98046374	+	ENSG00000139793.14	12.9092	12.7731	13.0317	18.5409	19.5197	17.8074
CCNB1	-0.525058	1.02564e-52	5.7201e-52	None	59.8307	95.4478	0.626842	chr5	68462837	68474072	+	ENSG00000134057.10	94.8062	98.1032	93.434	59.7551	62.3283	57.4086
RPL3	0.47522	1.06907e-52	5.95681e-52	None	493.567	396.416	1.24507	chr22	39708887	39716394	-	ENSG00000100316.11	386.494	393.243	409.51	511.891	480.888	487.921
USP14	-0.608891	1.23202e-52	6.85845e-52	None	29.4778	49.7478	0.592545	chr18	158383	214629	+	ENSG00000101557.10	52.6077	47.2869	49.3487	29.2403	30.6488	28.5442
SUCO	0.615207	1.23416e-52	6.86402e-52	None	23.5127	15.8676	1.4818	chr1	172501489	172580971	+	ENSG00000094975.9	16.2067	15.3103	16.0859	23.1858	24.1432	23.2091
LRPPRC	-0.498923	1.42689e-52	7.9286e-52	None	60.0902	91.9885	0.653236	chr2	44113647	44223144	-	ENSG00000138095.14	95.1102	90.5035	90.3517	60.5184	61.9371	57.815
STRA13	-0.823592	1.79105e-52	9.94294e-52	None	27.7129	52.4803	0.528063	chr17	79976578	79981983	-	ENSG00000169689.10	51.5247	54.1621	51.7542	28.4481	28.9666	25.7241
FADD	-0.546896	2.35422e-52	1.30574e-51	None	54.7645	86.4339	0.633599	chr11	70049269	70053496	+	ENSG00000168040.4	85.6171	86.8137	86.8709	57.7421	54.439	52.1123
TOE1	-0.854443	2.39743e-52	1.32848e-51	None	10.4551	19.5983	0.533467	chr1	45805342	45809647	+	ENSG00000132773.7	20.4636	18.9663	19.3652	11.0694	10.1899	10.1059
USP9X	0.564024	2.58523e-52	1.43124e-51	None	27.5021	19.8989	1.38209	chrX	40944888	41095832	+	ENSG00000124486.8	21.1437	18.4489	20.1041	26.7065	27.5543	28.2455
DFFA	-0.60474	2.83352e-52	1.56726e-51	None	11.3713	20.7189	0.548838	chr1	10516579	10532583	-	ENSG00000160049.7	21.7316	20.2125	20.2125	11.3429	11.1567	11.6143
SENP3	-0.671825	3.70312e-52	2.04637e-51	None	19.2379	33.2282	0.578962	chr17	7465192	7475287	+	ENSG00000161956.8	34.5933	32.6475	32.4438	19.1551	20.1803	18.3782
POLR2D	-0.65819	3.88853e-52	2.14686e-51	None	15.7076	27.8974	0.563052	chr2	128603840	128615731	-	ENSG00000144231.6	28.0092	28.4725	27.2104	15.4841	17.0793	14.5595
FAM83G	-0.588151	4.35436e-52	2.40185e-51	None	17.137	27.7968	0.61651	chr17	18872102	18908117	-	ENSG00000188522.10	26.8134	27.5777	28.9994	17.4716	17.09	16.8495
SPPL2A	0.655387	4.97899e-52	2.7439e-51	None	32.8036	22.2357	1.47527	chr15	50999506	51058005	-	ENSG00000138600.5	23.522	20.6606	22.5245	34.3508	33.3515	30.7085
TGIF1	0.662915	5.28647e-52	2.91069e-51	None	43.9446	30.0086	1.4644	chr18	3411606	3458409	+	ENSG00000177426.16	29.2976	29.2951	31.433	46.3832	42.2611	43.1894
CDC42SE1	0.546767	5.48743e-52	3.01858e-51	None	62.0881	45.4103	1.36727	chr1	151023447	151042801	-	ENSG00000197622.8	45.4821	44.3522	46.3965	63.6884	61.8849	60.6909
TCTN2	0.985316	7.14396e-52	3.92625e-51	None	11.6109	6.27901	1.84915	chr12	124155660	124192948	+	ENSG00000168778.7	6.0192	6.0243	6.79354	10.9089	11.845	12.0787
SNRPG	-0.83069	8.31271e-52	4.56443e-51	None	42.4656	82.6465	0.513821	chr2	70508494	70520903	-	ENSG00000143977.9	88.292	80.0826	79.5649	39.9195	43.9091	43.5681
SGCE	0.810417	1.11894e-51	6.13841e-51	None	22.5926	13.9003	1.62533	chr7	94214542	94285521	-	ENSG00000127990.11	14.3932	13.569	13.7388	22.1542	23.5499	22.0736
PLXNB1	0.913982	1.32477e-51	7.26098e-51	None	10.5437	6.31083	1.67074	chr3	48445261	48471594	-	ENSG00000164050.8	5.90035	5.92735	7.10479	10.6314	10.1446	10.8552
OGFOD1	-0.663075	2.12764e-51	1.16509e-50	None	9.95235	16.1141	0.617619	chr16	56485402	56513012	+	ENSG00000087263.12	17.0407	15.4999	15.8016	9.80814	10.427	9.62192
TRIM28	-0.492784	2.40651e-51	1.3166e-50	None	105.792	171.972	0.615173	chr19	59055458	59062089	+	ENSG00000130726.7	164.995	174.62	176.3	98.802	99.5392	119.036
GLTP	0.764474	2.67672e-51	1.46311e-50	None	17.6306	11.1216	1.58526	chr12	110288748	110318293	-	ENSG00000139433.5	10.605	11.6935	11.0663	18.5491	17.2603	17.0824
AKAP1	-0.598615	2.71209e-51	1.4811e-50	None	14.8652	22.8968	0.649228	chr17	55162453	55198710	+	ENSG00000121057.8	23.9635	20.0002	24.7266	15.0995	15.8418	13.6543
C1QTNF6	0.667159	2.8581e-51	1.55943e-50	None	55.8103	38.5201	1.44886	chr22	37576207	37595425	-	ENSG00000133466.9	35.1599	40.1597	40.2406	54.9228	57.085	55.423
NAGK	0.92822	2.87909e-51	1.56947e-50	None	16.4196	9.45149	1.73725	chr2	71291474	71306935	+	ENSG00000124357.8	9.73866	9.63158	8.98424	16.2717	15.5154	17.4716
YWHAQ	-0.54683	2.93558e-51	1.59882e-50	None	178.69	278.181	0.642352	chr2	9724101	9771143	-	ENSG00000134308.9	285.221	273.053	276.269	190.211	180.73	165.129
FAM111B	-0.862604	3.24561e-51	1.76608e-50	None	6.23779	12.3281	0.505982	chr11	58874658	58894883	+	ENSG00000189057.6	12.693	12.4006	11.8906	6.57083	6.49146	5.65107
CFL1	-0.441472	3.79544e-51	2.06341e-50	None	165.248	228.105	0.724438	chr11	65590493	65629497	-	ENSG00000172757.8	212.819	237.59	233.906	178.642	158.164	158.938
NUP205	-0.483028	3.99264e-51	2.16867e-50	None	21.8821	32.5792	0.671657	chr7	135242667	135333505	+	ENSG00000155561.10	32.7986	32.3079	32.6312	22.0765	22.655	20.9147
POGK	-0.579491	4.36192e-51	2.36712e-50	None	11.7979	19.0013	0.620897	chr1	166808681	166825581	+	ENSG00000143157.7	19.5792	18.9542	18.4705	11.9429	12.3161	11.1346
STAC	-0.850441	4.67398e-51	2.53419e-50	None	6.35619	11.9967	0.529827	chr3	36421836	36589499	+	ENSG00000144681.6	12.0153	12.4816	11.4932	6.46007	6.47442	6.13408
TICRR	-0.597571	4.9997e-51	2.70836e-50	None	10.8421	17.7795	0.609813	chr15	90118713	90174287	+	ENSG00000140534.9	17.6567	17.8248	17.8569	10.4447	11.2246	10.8572
LTA4H	0.544438	5.70935e-51	3.09e-50	None	62.2726	46.3672	1.34303	chr12	96394606	96437298	-	ENSG00000111144.5	46.5342	46.4666	46.1009	66.4822	62.1477	58.1881
NIPBL	0.504023	5.76499e-51	3.11733e-50	None	32.2256	24.3526	1.32329	chr5	36876861	37066515	+	ENSG00000164190.12	24.2792	24.1159	24.6628	32.0729	33.3841	31.2199
IARS	-0.454035	7.99437e-51	4.31896e-50	None	116.263	172	0.675948	chr9	94972489	95056038	-	ENSG00000196305.13	177.592	169.468	168.942	116.774	118.23	113.786
PSMG1	-1.02595	1.00566e-50	5.42823e-50	Down	7.92763	21.762	0.364287	chr21	40546695	40555777	-	ENSG00000183527.7	27.2648	17.1328	20.8885	9.4905	7.26137	7.03102
SNRPA1	-0.823191	1.08207e-50	5.83547e-50	None	16.3657	33.3186	0.491188	chr15	101821715	101835487	-	ENSG00000131876.12	34.8296	31.3908	33.7353	17.6621	15.2714	16.1635
PSMD7	-0.573356	1.27105e-50	6.84849e-50	None	39.7357	63.2263	0.628468	chr16	74330673	74340186	+	ENSG00000103035.6	64.1704	63.316	62.1927	41.1862	40.548	37.4729
EFCAB14	0.49086	1.28874e-50	6.93761e-50	None	36.5241	27.9966	1.30459	chr1	47124366	47184824	-	ENSG00000159658.6	28.6846	27.7607	27.5445	37.0089	36.3414	36.2221
RP11-295P9.3	1.00581	1.38855e-50	7.46827e-50	Up	15.1168	8.30141	1.821	chr10	13652047	13710299	+	ENSG00000239665.4	8.61344	7.96657	8.3242	14.392	14.9123	16.0461
NUPL1	-0.578563	1.47049e-50	7.90195e-50	None	15.6791	24.2317	0.64705	chr13	25875662	25923938	+	ENSG00000139496.11	25.2366	23.4861	23.9724	16.4118	15.6291	14.9964
TBCK	0.873859	1.63844e-50	8.79662e-50	None	14.985	8.83463	1.69616	chr4	106962756	107242652	-	ENSG00000145348.12	8.87734	8.37507	9.25149	14.1919	14.0812	16.6818
RNASEH1	-0.908252	1.68771e-50	9.05307e-50	None	9.1895	18.7357	0.490481	chr2	3592383	3606206	-	ENSG00000171865.5	18.5835	19.2989	18.3247	9.34792	10.0926	8.128
PRDX5	0.729238	1.80469e-50	9.67196e-50	None	89.3004	60.6625	1.47209	chr11	64085560	64089283	+	ENSG00000126432.9	56.9879	63.882	61.1176	90.1759	92.3399	85.3852
EFNA5	0.608842	2.24559e-50	1.20243e-49	None	21.9633	14.925	1.47157	chr5	106712590	107006596	-	ENSG00000184349.8	13.802	15.0286	15.9444	23.1713	19.165	23.5535
CCNL2	0.579717	2.39757e-50	1.28267e-49	None	36.6142	30.6572	1.19431	chr1	1321091	1334708	-	ENSG00000221978.7	28.4121	28.2479	35.3116	40.7487	33.3836	35.7102
TPCN1	0.627186	2.48567e-50	1.32862e-49	None	16.422	11.0933	1.48035	chr12	113658855	113736390	+	ENSG00000186815.8	10.8094	10.6586	11.8119	16.9254	15.9714	16.3693
ARHGEF5	0.558311	2.74128e-50	1.46396e-49	None	16.7764	12.3135	1.36244	chr7	144052381	144077725	+	ENSG00000050327.10	12.0102	12.4972	12.4331	16.916	16.8112	16.6019
CXXC5	0.712306	3.39756e-50	1.81283e-49	None	34.527	22.5243	1.53288	chr5	139026884	139063467	+	ENSG00000171604.7	22.5152	23.5466	21.5112	34.6742	34.2693	34.6375
MAVS	0.604459	3.40459e-50	1.81498e-49	None	40.3602	29.506	1.36786	chr20	3827487	3849280	+	ENSG00000088888.13	27.8655	29.9925	30.6599	40.2733	40.1779	40.6292
ZNF655	0.616835	4.17625e-50	2.22439e-49	None	34.388	24.2285	1.41932	chr7	99156029	99174076	+	ENSG00000197343.6	24.7695	21.7976	26.1184	33.8421	33.8761	35.4458
TMEM254	1.02095	4.88881e-50	2.60162e-49	Up	11.9757	6.43979	1.85964	chr10	81838402	81852313	+	ENSG00000133678.9	5.963	6.97556	6.38081	12.0641	12.1686	11.6944
CCDC50	0.492908	4.91462e-50	2.61306e-49	None	33.8409	18.9932	1.78173	chr3	191046866	191116459	+	ENSG00000152492.9	19.3264	18.2022	19.4511	34.2671	33.1015	34.1542
SELL	-0.544697	5.22307e-50	2.77461e-49	None	26.8125	42.5189	0.6306	chr1	169659808	169680839	-	ENSG00000188404.4	42.3695	42.5309	42.6565	27.2604	27.5138	25.6631
TRIM4	0.850511	5.61008e-50	2.97758e-49	None	11.0964	7.15992	1.54979	chr7	99474581	99517223	-	ENSG00000146833.11	7.55251	6.90811	7.01914	10.6073	11.5418	11.14
TSPAN6	0.602701	5.69332e-50	3.01911e-49	None	30.977	22.0863	1.40254	chrX	99883667	99894988	-	ENSG00000000003.10	22.367	21.4262	22.4658	31.4801	31.7009	29.7499
ANAPC16	0.631171	5.87724e-50	3.1139e-49	None	27.9883	19.1685	1.46012	chr10	73975787	73995618	+	ENSG00000166295.4	18.6453	19.5792	19.2808	28.5227	27.9041	27.538
FTH1	0.534969	6.86998e-50	3.63669e-49	None	240.688	184.593	1.30389	chr11	61727190	61735132	-	ENSG00000167996.11	166.826	191.353	195.599	238.159	240.356	243.55
SYNGR2	0.642136	7.71351e-50	4.07965e-49	None	34.5415	22.797	1.51518	chr17	76164639	76169608	+	ENSG00000108639.3	21.8438	23.4619	23.0853	33.1922	33.8306	36.6016
VKORC1L1	-0.589122	7.84463e-50	4.14537e-49	None	8.60655	15.1275	0.568933	chr7	65338254	65424550	+	ENSG00000196715.5	14.7988	15.3265	15.2572	8.67084	8.63819	8.51061
NXT1	-0.994729	1.1252e-49	5.94073e-49	None	9.281	19.9996	0.46406	chr20	23331373	23335414	+	ENSG00000132661.3	20.6312	19.9279	19.4396	9.4943	9.05375	9.29496
SDHB	-0.606477	1.19479e-49	6.30264e-49	None	53.5545	88.3394	0.606236	chr1	17345217	17380665	-	ENSG00000117118.5	87.2983	90.608	87.1119	55.4946	53.7121	51.4567
PDLIM7	-0.793471	1.37306e-49	7.23673e-49	None	16.6199	30.355	0.547516	chr5	176910395	176924607	-	ENSG00000196923.9	29.6579	30.6991	30.708	17.8867	15.7617	16.2112
ASUN	-0.69772	1.42024e-49	7.47885e-49	None	12.9091	22.8281	0.565493	chr12	27058114	27091259	-	ENSG00000064102.10	23.8047	23.2779	21.4017	13.0629	13.6687	11.9959
SKP2	-0.589096	1.48455e-49	7.8107e-49	None	26.5512	45.0841	0.588925	chr5	36152091	36184421	+	ENSG00000145604.11	44.1429	47.1898	43.9197	28.5049	25.9371	25.2116
LRIG3	0.834386	1.86342e-49	9.79551e-49	None	13.4617	7.36399	1.82805	chr12	59265931	59314303	-	ENSG00000139263.7	7.73586	6.98787	7.36824	13.2522	13.3548	13.7782
E2F4	-0.57464	1.95588e-49	1.02726e-48	None	27.2187	43.3137	0.628408	chr16	67226072	67232821	+	ENSG00000205250.4	44.2389	41.2433	44.4588	25.992	29.0058	26.6582
IQCE	0.895358	2.0801e-49	1.09155e-48	None	13.1841	7.51579	1.75419	chr7	2598632	2654368	+	ENSG00000106012.13	8.54929	6.81057	7.1875	13.2703	11.9875	14.2944
TNRC18	0.676953	2.08302e-49	1.09214e-48	None	16.0407	10.1379	1.58225	chr7	5346421	5465045	-	ENSG00000182095.10	9.86083	10.3292	10.2236	15.7913	16.1801	16.1506
SUV39H2	-0.82547	2.24073e-49	1.17381e-48	None	9.95716	17.4698	0.569965	chr10	14920819	14946314	+	ENSG00000152455.11	16.6975	14.6329	21.0789	8.84079	7.81218	13.2185
TMEM138	-0.871899	2.71408e-49	1.42054e-48	None	8.74878	17.2916	0.505956	chr11	61129473	61136981	+	ENSG00000149483.7	17.4216	17.1666	17.2866	9.35	8.87668	8.01967
ZFAND3	0.734419	2.89546e-49	1.51416e-48	None	17.3567	11.4023	1.52221	chr6	37787275	38122400	+	ENSG00000156639.7	11.1139	11.9135	11.1795	17.5029	17.0912	17.4758
SLC39A8	-0.864168	3.13718e-49	1.63915e-48	None	7.98518	15.6451	0.510394	chr4	103172198	103352415	-	ENSG00000138821.8	17.0859	14.5946	15.2549	8.2535	8.14549	7.55654
RALGPS2	0.509722	3.49934e-49	1.8268e-48	None	36.8466	27.7196	1.32926	chr1	178694300	178889238	+	ENSG00000116191.13	28.2925	27.2491	27.6173	37.1417	37.1513	36.247
C19orf48	-0.621697	3.64502e-49	1.9012e-48	None	49.4865	80.9652	0.611206	chr19	51300961	51308186	-	ENSG00000167747.9	75.2668	83.638	83.9909	45.1258	51.8383	51.4953
KIAA1524	-0.783905	4.11015e-49	2.14196e-48	None	12.4493	21.892	0.568669	chr3	108268716	108308491	-	ENSG00000163507.9	23.8979	21.245	20.533	11.5787	14.4364	11.3328
RNF141	0.674741	4.15451e-49	2.16321e-48	None	14.1743	9.84467	1.43979	chr11	10533225	10562777	-	ENSG00000110315.2	10.1507	9.92019	9.46314	14.1534	14.8265	13.5428
HN1	-0.570016	4.22496e-49	2.198e-48	None	39.6513	62.3366	0.636084	chr17	73131343	73164376	-	ENSG00000189159.11	61.8372	62.4084	62.7642	40.8862	38.3814	39.6863
ABHD4	0.945749	4.941e-49	2.5683e-48	None	11.0404	6.22244	1.7743	chr14	23067146	23081265	+	ENSG00000100439.6	5.67723	6.4732	6.51687	11.4177	10.9485	10.7551
LANCL2	-0.553595	5.126e-49	2.66217e-48	None	20.3737	31.6352	0.644018	chr7	55433141	55501435	+	ENSG00000132434.5	31.8519	32.2789	30.7749	21.3599	20.3889	19.3722
STIM1	0.799425	5.43691e-49	2.82122e-48	None	10.1789	6.09657	1.66961	chr11	3875757	4114439	+	ENSG00000167323.5	5.69425	6.49068	6.10477	9.87686	10.3226	10.3372
SRSF1	-0.566498	6.32654e-49	3.28003e-48	None	115.449	181.954	0.634495	chr17	56080721	56084707	-	ENSG00000136450.8	189.594	180.889	175.378	123.859	117.976	104.51
ATF7IP	0.516851	7.08452e-49	3.66985e-48	None	28.4579	21.541	1.3211	chr12	14518610	14651697	+	ENSG00000171681.8	21.6049	21.1313	21.8869	27.4844	29.6069	28.2823
ENTPD7	0.632033	8.43481e-49	4.36557e-48	None	18.3402	12.7745	1.43569	chr10	101419263	101465997	+	ENSG00000198018.6	12.8387	12.6066	12.8782	18.1671	18.3138	18.5397
TNKS1BP1	0.628712	1.01528e-48	5.25022e-48	None	39.9621	26.5165	1.50706	chr11	57067112	57092426	-	ENSG00000149115.9	24.4976	27.2163	27.8357	40.9227	38.4038	40.5598
UBE2N	-0.634304	1.02124e-48	5.27655e-48	None	21.097	32.9223	0.640811	chr12	93799449	93836038	-	ENSG00000177889.5	32.1784	32.244	34.3444	21.445	21.139	20.7069
USP40	0.702255	1.18494e-48	6.11711e-48	None	13.2894	8.493	1.56475	chr2	234384166	234475428	-	ENSG00000085982.9	8.60341	8.16675	8.70885	13.2285	13.0226	13.6171
HNRNPA2B1	-0.583208	1.27502e-48	6.57656e-48	None	167.463	280.309	0.597421	chr7	26229547	26241149	-	ENSG00000122566.16	285.976	273.125	281.827	178.254	173.822	150.312
SLC41A3	0.881737	2.15886e-48	1.11259e-47	None	13.822	7.91745	1.74576	chr3	125725198	125820404	-	ENSG00000114544.11	8.11657	7.58324	8.05254	13.3149	15.2342	12.9168
LCOR	0.52621	2.26646e-48	1.16704e-47	None	31.3182	26.6836	1.17369	chr10	98592017	98740800	+	ENSG00000196233.7	26.7574	26.7333	26.56	30.9204	32.3631	30.6712
BRD8	0.550872	2.28089e-48	1.17347e-47	None	58.1056	42.1258	1.37933	chr5	137475455	137514675	-	ENSG00000112983.13	40.0486	42.8866	43.4424	60.0309	57.0788	57.2072
DHX37	-0.761811	2.6074e-48	1.34032e-47	None	6.9029	12.4319	0.555259	chr12	125431371	125473668	-	ENSG00000150990.3	12.2535	12.4602	12.5818	6.8159	6.62674	7.26606
CDCA8	-0.525316	2.77243e-48	1.42393e-47	None	34.4457	53.6769	0.641723	chr1	38158090	38175391	+	ENSG00000134690.6	53.0364	54.606	53.3882	35.7906	35.0899	32.4566
QTRTD1	-0.66637	2.87233e-48	1.47399e-47	None	11.0407	18.0512	0.611635	chr3	113724680	113807269	+	ENSG00000151576.6	18.4453	17.8305	17.8777	11.071	11.679	10.3722
VCP	-0.461188	3.45236e-48	1.77014e-47	None	49.3133	74.8945	0.658437	chr9	35056061	35073246	-	ENSG00000165280.11	73.0246	76.9592	74.6998	52.1001	48.4357	47.4041
UQCRFS1	-0.537078	4.04905e-48	2.07432e-47	None	54.071	84.7564	0.637958	chr19	29698173	29704448	-	ENSG00000169021.4	86.3151	84.9724	82.9816	55.0268	56.3678	50.8184
NUMA1	0.59491	5.29233e-48	2.70895e-47	None	36.1264	25.8128	1.39955	chr11	71713910	71791739	-	ENSG00000137497.13	26.2365	26.6096	24.5923	35.8045	35.9601	36.6144
GLS	-0.541997	5.31106e-48	2.71624e-47	None	24.2476	37.9939	0.638198	chr2	191745553	191830278	+	ENSG00000115419.8	38.5917	37.5586	37.8315	24.9979	23.3799	24.3651
VPS13B	0.548628	7.65362e-48	3.91099e-47	None	18.2983	13.269	1.37902	chr8	100025494	100889808	+	ENSG00000132549.14	13.2587	13.0924	13.4559	17.8	18.7346	18.3602
AUNIP	-1.05212	7.76175e-48	3.96289e-47	Down	4.6125	10.4557	0.441145	chr1	26158414	26185903	-	ENSG00000127423.6	10.6371	10.3368	10.3934	5.01347	4.30007	4.52396
ARHGEF10L	0.745195	8.09569e-48	4.1299e-47	None	19.0679	12.7433	1.49631	chr1	17866330	18024369	+	ENSG00000074964.12	12.6796	12.5873	12.9628	18.4064	18.5515	20.2457
N4BP2L2	0.729689	8.36076e-48	4.26152e-47	None	30.0577	21.7401	1.3826	chr13	33006554	33112970	-	ENSG00000244754.4	22.0865	23.2858	19.8479	28.9402	30.4674	30.7656
DMXL2	0.606268	8.39636e-48	4.27605e-47	None	20.9055	13.4128	1.55861	chr15	51739908	51915030	-	ENSG00000104093.9	13.8707	12.8073	13.5606	21.03	20.2925	21.3939
GAL	-1.86314	1.13817e-47	5.79154e-47	Down	2.82875	11.1942	0.252697	chr11	68451247	68458643	+	ENSG00000069482.6	12.0958	10.6575	10.8294	2.33318	3.49162	2.66145
DESI1	-0.770685	1.17702e-47	5.98417e-47	None	6.69625	11.6843	0.573099	chr22	41994032	42017100	-	ENSG00000100418.7	11.8102	12.0306	11.2121	6.70691	6.60809	6.77377
NUP50	-0.540315	1.3847e-47	7.03416e-47	None	26.7908	40.1666	0.666992	chr22	45559722	45583896	+	ENSG00000093000.14	41.4249	39.6291	39.4457	27.3221	27.3925	25.6577
NPC2	0.526879	1.40682e-47	7.14048e-47	None	107.223	79.4953	1.3488	chr14	74942895	74960880	-	ENSG00000119655.4	84.0868	74.0198	80.3792	109.166	113.535	98.9674
DHX40	0.656264	1.50202e-47	7.6173e-47	None	22.7818	15.5776	1.46247	chr17	57642886	57685706	+	ENSG00000108406.5	16.2781	14.8384	15.6164	23.6957	23.2476	21.4019
ZNF598	-0.775916	1.79893e-47	9.1154e-47	None	7.25275	13.5276	0.536145	chr16	2047655	2059824	-	ENSG00000167962.8	12.9014	13.4178	14.2636	7.72624	7.09294	6.93907
C20orf24	-0.729574	2.09407e-47	1.0602e-46	None	23.5009	42.0873	0.558386	chr20	35234137	35240960	+	ENSG00000101084.12	42.1609	43.0303	41.0706	24.7168	24.0013	21.7846
DLG3	0.617886	2.14374e-47	1.08444e-46	None	16.0033	11.0532	1.44784	chrX	69664711	69725337	+	ENSG00000082458.7	10.4892	11.4411	11.2294	16.3339	16.0472	15.629
FAM83D	-0.702117	2.19686e-47	1.11038e-46	None	17.0335	29.9236	0.569234	chr20	37554955	37581703	+	ENSG00000101447.9	28.814	30.2281	30.7288	16.9247	18.4883	15.6876
USP54	0.624465	2.21759e-47	1.11992e-46	None	19.9679	14.2007	1.40612	chr10	75257296	75385711	-	ENSG00000166348.13	12.5405	13.1504	16.9113	18.1184	19.7382	22.0471
TMEM132A	0.983857	2.34837e-47	1.18497e-46	None	12.2673	6.70261	1.83023	chr11	60691935	60704631	+	ENSG00000006118.10	6.50485	6.53103	7.07194	12.6619	11.4155	12.7245
RBCK1	0.715003	2.40218e-47	1.21112e-46	None	24.0429	16.5628	1.45162	chr20	388142	411610	+	ENSG00000125826.15	15.3704	16.3035	18.0146	24.4044	23.882	23.8424
FUS	-0.472549	2.73411e-47	1.37732e-46	None	48.4952	78.5799	0.617145	chr16	31191431	31203127	+	ENSG00000089280.14	79.6434	83.1755	72.9207	48.7623	48.9924	47.7308
USP39	-0.529733	2.78049e-47	1.39951e-46	None	31.3009	48.9332	0.639667	chr2	85829979	85876403	+	ENSG00000168883.15	49.1073	48.5831	49.1091	32.8596	30.5698	30.4734
VEGFA	-0.719249	2.82297e-47	1.41971e-46	None	6.84606	13.3408	0.513166	chr6	43737921	43754224	+	ENSG00000112715.16	15.2927	11.8953	12.8345	6.98271	7.83341	5.72208
LAMP1	0.510914	2.88654e-47	1.45048e-46	None	68.8266	53.6508	1.28286	chr13	113951556	113977987	+	ENSG00000185896.9	51.8994	53.776	55.2768	67.5991	74.077	64.8037
AFG3L2	-0.539283	3.08943e-47	1.55114e-46	None	23.7648	37.2883	0.637326	chr18	12328943	12377313	-	ENSG00000141385.5	37.4721	37.8376	36.5551	24.2883	24.7499	22.2563
TNRC6B	0.660864	3.41427e-47	1.71281e-46	None	14.4	9.01757	1.59689	chr22	40440821	40731812	+	ENSG00000100354.16	8.80229	9.08606	9.16436	14.6219	14.2724	14.3058
CUEDC1	0.717677	3.49191e-47	1.7503e-46	None	17.9809	11.5665	1.55456	chr17	55938604	56032684	-	ENSG00000180891.8	11.0437	11.1371	12.5188	17.6306	17.9248	18.3874
RANBP17	0.676441	3.81809e-47	1.91221e-46	None	13.4822	8.7997	1.53212	chr5	170288874	170727019	+	ENSG00000204764.8	8.83874	8.83579	8.72457	13.3655	12.927	14.1539
HIST1H2AB	-0.581927	4.62893e-47	2.31638e-46	None	89.682	145.041	0.618322	chr6	26033320	26033796	-	ENSG00000137259.2	145.05	144.606	145.467	92.1488	89.9159	86.9812
CENPN	-0.682577	5.92386e-47	2.95948e-46	None	20.8723	37.5296	0.556155	chr16	81040103	81066719	+	ENSG00000166451.9	38.9186	36.5883	37.082	22.47	19.347	20.7997
CHMP2A	0.787197	5.92051e-47	2.95948e-46	None	33.7262	21.268	1.58577	chr19	59062933	59066491	-	ENSG00000130724.4	21.3822	21.8729	20.549	33.5734	35.9412	31.6638
MAP3K13	0.713129	6.85575e-47	3.42221e-46	None	19.9529	14.4811	1.37786	chr3	185000729	185206885	+	ENSG00000073803.9	14.6968	14.1534	14.5932	18.5048	21.2679	20.086
EIF3C	-0.532613	9.08888e-47	4.53318e-46	None	37.9521	58.5012	0.64874	chr16	28699879	28747051	+	ENSG00000184110.10	55.8479	59.8447	59.8109	37.617	38.5858	37.6535
PROSER2	-0.938478	9.4916e-47	4.73014e-46	None	5.23103	10.056	0.520189	chr10	11865338	11914276	+	ENSG00000148426.8	9.06642	10.2677	10.8339	4.79311	5.27985	5.62013
MFN2	-0.517057	9.51466e-47	4.73772e-46	None	24.4565	37.4709	0.652679	chr1	12040238	12073571	+	ENSG00000116688.12	36.4461	37.7039	38.2628	25.226	24.4306	23.7129
NTMT1	-1.02138	9.87803e-47	4.91461e-46	Down	11.7185	27.0676	0.432934	chr9	132371163	132398209	+	ENSG00000148335.10	25.4952	26.588	29.1195	11.6881	11.7927	11.6747
C6orf89	0.509487	1.09609e-46	5.44885e-46	None	23.5495	16.7773	1.40365	chr6	36839646	36896740	+	ENSG00000198663.12	17.9284	18.7533	13.6503	25.7032	23.4908	21.4545
LRRC58	-0.550593	1.17711e-46	5.84684e-46	None	12.9523	20.4964	0.631931	chr3	120043356	120068186	-	ENSG00000163428.3	21.4214	19.8227	20.245	13.2651	13.2366	12.3551
RNF130	0.699493	1.35454e-46	6.7226e-46	None	14.0239	8.82294	1.58948	chr5	179338651	179499118	-	ENSG00000113269.9	8.50505	8.52921	9.43456	15.3811	13.5609	13.1297
SLC35D2	0.811376	1.46045e-46	7.24231e-46	None	22.7489	13.9134	1.63504	chr9	99082988	99145992	-	ENSG00000130958.7	14.4769	14.2024	13.0608	22.8523	23.6145	21.7798
ADSL	-0.720815	1.49203e-46	7.39285e-46	None	16.1951	28.9035	0.560318	chr22	40742507	40786467	+	ENSG00000239900.7	28.9056	29.2913	28.5134	17.7849	16.3427	14.4578
LPIN1	-0.530709	2.04486e-46	1.01238e-45	None	15.232	23.5457	0.646913	chr2	11817721	11967535	+	ENSG00000134324.7	23.9149	23.6839	23.0383	16.3587	14.6655	14.6718
PBK	-0.851262	2.82739e-46	1.39864e-45	None	13.4332	26.321	0.51036	chr8	27667137	27695612	-	ENSG00000168078.5	27.7454	25.7256	25.492	13.8858	14.7035	11.7103
RRN3	-0.620215	2.86079e-46	1.41401e-45	None	10.8171	18.4772	0.585426	chr16	15153879	15188174	-	ENSG00000085721.8	19.2485	18.0159	18.1672	10.5749	11.0611	10.8153
DDB2	0.758788	3.25047e-46	1.6053e-45	None	18.6059	11.8761	1.56667	chr11	47236493	47260767	+	ENSG00000134574.7	11.6248	12.6027	11.401	19.1185	18.908	17.7914
NIPAL3	0.681213	3.38975e-46	1.67272e-45	None	10.8419	7.64529	1.41811	chr1	24742284	24799466	+	ENSG00000001461.12	7.59575	7.8378	7.50233	10.6227	10.5292	11.3736
GMNN	-0.769811	3.4689e-46	1.71038e-45	None	20.4029	36.3716	0.560956	chr6	24775159	24786327	+	ENSG00000112312.5	37.844	35.4535	35.8173	21.0812	20.9463	19.1811
ATP1B1	-0.791359	3.49746e-46	1.72306e-45	None	12.395	22.9992	0.538929	chr1	169074935	169101960	+	ENSG00000143153.8	23.9346	22.9817	22.0815	13.4153	11.9252	11.8443
C16orf58	0.787961	3.501e-46	1.72339e-45	None	22.4406	14.0704	1.59488	chr16	31500792	31520630	-	ENSG00000140688.12	12.7658	14.7188	14.7266	22.89	22.4143	22.0174
MLLT4	0.470459	3.67265e-46	1.80495e-45	None	52.6737	38.3152	1.37475	chr6	168227602	168372703	+	ENSG00000130396.16	38.2596	37.055	39.6309	54.2477	53.7216	50.0519
SAMD12	0.632541	3.67192e-46	1.80495e-45	None	13.9038	8.91881	1.55892	chr8	119201698	119634234	-	ENSG00000177570.9	9.76344	8.35468	8.63831	13.4106	13.6822	14.6184
CCDC6	0.449124	3.69227e-46	1.81311e-45	None	47.76	37.5831	1.27078	chr10	61548521	61666414	-	ENSG00000108091.10	38.062	36.5678	38.1196	48.209	48.5838	46.4871
XRCC3	-0.834784	4.00386e-46	1.96453e-45	None	8.13852	15.9834	0.509184	chr14	104163946	104181841	-	ENSG00000126215.9	16.3403	15.5955	16.0145	8.46513	7.54288	8.40756
GGCX	0.566016	4.59705e-46	2.25375e-45	None	16.091	13.2651	1.21303	chr2	85771846	85788670	-	ENSG00000115486.7	12.9475	12.0326	14.8152	15.2926	15.1098	17.8704
CAB39	-0.573512	4.60645e-46	2.25653e-45	None	39.6021	64.2911	0.61598	chr2	231577560	231685790	+	ENSG00000135932.6	68.57	61.3444	62.9589	40.6756	40.2798	37.8507
CAMK2G	0.515689	5.03834e-46	2.46609e-45	None	28.8272	22.8811	1.25987	chr10	75572259	75634343	-	ENSG00000148660.16	22.4051	22.6982	23.5401	29.2973	29.5544	27.6299
GULP1	0.637514	5.62841e-46	2.75268e-45	None	31.7445	21.7618	1.45873	chr2	189156396	189460653	+	ENSG00000144366.11	23.2062	20.7661	21.313	33.0612	30.7717	31.4007
RFC3	-0.688276	5.73143e-46	2.8008e-45	None	17.1677	29.4851	0.582251	chr13	34392186	34540695	+	ENSG00000133119.8	30.8991	29.3171	28.239	16.5975	17.466	17.4396
NUDT4	0.619838	7.40434e-46	3.61538e-45	None	24.031	15.7347	1.52726	chr12	93771659	93797024	+	ENSG00000173598.9	15.2418	17.7668	14.1956	21.5033	25.1385	25.4512
CLEC2D	1.57164	8.00588e-46	3.90594e-45	Up	11.9067	4.08731	2.91309	chr12	9817565	9848413	+	ENSG00000069493.10	4.09558	3.68595	4.48039	11.034	9.95385	14.7323
PLOD3	-0.586891	8.07473e-46	3.93635e-45	None	15.6217	25.2282	0.619213	chr7	100849258	100861701	-	ENSG00000106397.7	24.7758	25.4003	25.5085	15.6563	16.116	15.0927
ZFAND5	0.510392	1.05525e-45	5.1401e-45	None	47.43	35.3103	1.34323	chr9	74966341	74980163	-	ENSG00000107372.8	35.6224	35.0663	35.2422	48.0681	48.8973	45.3244
PRKAR2A	-0.553974	1.28142e-45	6.23673e-45	None	10.5317	16.301	0.646078	chr3	48782030	48885279	-	ENSG00000114302.11	16.506	16.6135	15.7835	10.3758	10.9191	10.3002
ORC1	-0.75229	1.30868e-45	6.36428e-45	None	8.52243	15.6258	0.545409	chr1	52838501	52870131	-	ENSG00000085840.8	14.8187	16.3925	15.6661	8.2931	9.08927	8.18492
SLC25A10	-0.80962	1.41671e-45	6.88408e-45	None	11.2181	20.7777	0.539911	chr17	79670404	79688042	+	ENSG00000183048.7	20.0814	20.032	22.2196	11.1692	11.9004	10.5847
NCBP1	-0.537532	1.65749e-45	8.04761e-45	None	25.0456	38.9667	0.642744	chr9	100395908	100436030	+	ENSG00000136937.8	40.3888	38.8178	37.6935	25.1705	26.3936	23.5727
CYC1	-0.569422	1.95937e-45	9.5057e-45	None	39.7363	63.6161	0.624627	chr8	145149930	145152428	+	ENSG00000179091.4	62.7969	65.0629	62.9884	40.3494	40.3442	38.5153
RRNAD1	0.868738	2.53149e-45	1.22714e-44	None	14.823	8.802	1.68404	chr1	156698234	156706752	+	ENSG00000143303.7	8.9961	8.67215	8.73775	16.2758	13.3694	14.8236
POP7	-0.817303	2.70694e-45	1.31114e-44	None	16.3661	31.1696	0.525066	chr7	100303676	100305118	+	ENSG00000172336.4	31.164	31.8155	30.5293	17.075	16.574	15.4493
GRHL2	0.513675	2.82607e-45	1.36775e-44	None	42.7457	31.8935	1.34026	chr8	102504660	102681954	+	ENSG00000083307.6	31.2426	31.9789	32.4589	41.9392	42.6322	43.6657
ACOT7	-0.648333	2.84735e-45	1.37694e-44	None	22.5746	41.0478	0.549959	chr1	6324329	6454451	-	ENSG00000097021.15	41.2128	42.1975	39.7332	22.424	23.7733	21.5266
MYLIP	0.740178	2.96452e-45	1.43246e-44	None	13.6995	9.01587	1.51948	chr6	16129356	16148479	+	ENSG00000007944.10	8.78693	9.28113	8.97956	13.8807	13.7605	13.4571
AUP1	-0.548967	2.97692e-45	1.4373e-44	None	48.1923	75.5019	0.638292	chr2	74753772	74757066	-	ENSG00000115307.12	75.1435	75.4833	75.8791	51.4692	46.963	46.1446
SHMT2	-0.515428	3.18136e-45	1.53478e-44	None	37.3084	62.6529	0.595477	chr12	57623110	57628718	+	ENSG00000182199.6	57.0935	57.9299	72.9353	39.0824	36.9098	35.933
HSPA14	-0.676206	4.62238e-45	2.22818e-44	None	18.5107	30.8804	0.59943	chr10	14880163	14913740	+	ENSG00000187522.9	31.4874	31.0791	30.0747	18.7159	18.609	18.2071
LRP11	0.648679	4.87349e-45	2.34736e-44	None	17.3532	11.6965	1.48363	chr6	150139934	150186199	-	ENSG00000120256.5	11.846	11.8985	11.3448	18.2189	17.3945	16.4464
LSR	0.60566	4.96446e-45	2.38927e-44	None	50.328	34.7813	1.44699	chr19	35739233	35758867	+	ENSG00000105699.12	32.3212	35.8512	36.1714	50.7359	50.6134	49.6347
ZMYND8	0.584681	5.31823e-45	2.55749e-44	None	31.9136	22.8344	1.39761	chr20	45837859	45985567	-	ENSG00000101040.15	21.848	23.4518	23.2034	29.8392	33.3595	32.5422
C14orf166	-0.66671	5.3573e-45	2.57423e-44	None	41.3065	70.6133	0.584968	chr14	52456193	52471420	+	ENSG00000087302.4	71.9965	71.8522	67.9913	40.0697	44.7471	39.1027
SHCBP1	-0.763662	5.83322e-45	2.80069e-44	None	6.73696	11.3804	0.591978	chr16	46614466	46655538	-	ENSG00000171241.4	11.9405	11.0983	11.1025	6.76108	6.43066	7.01914
ZNF259	-0.785018	6.83725e-45	3.28014e-44	None	7.1862	13.1027	0.548453	chr11	116648436	116658766	-	ENSG00000109917.6	13.0663	13.4706	12.7711	7.21431	7.37287	6.97141
LAS1L	-0.71523	7.42804e-45	3.56075e-44	None	11.5097	21.3906	0.538074	chrX	64732462	64754655	-	ENSG00000001497.12	22.3533	22.436	19.3823	10.3763	12.5403	11.6125
CXADR	0.698403	7.89773e-45	3.78289e-44	None	11.0939	7.80077	1.42215	chr21	18884700	18965897	+	ENSG00000154639.14	8.23807	7.17221	7.99204	11.3098	11.3041	10.6677
NOL9	-0.513564	8.55134e-45	4.09272e-44	None	12.8165	18.4354	0.695212	chr1	6581407	6614595	-	ENSG00000162408.10	18.8173	18.1811	18.3079	12.7333	12.6391	13.0772
MRPS2	-0.674113	8.5927e-45	4.10926e-44	None	24.4554	41.4542	0.589937	chr9	138391830	138396519	+	ENSG00000122140.6	39.6384	42.2498	42.4744	25.3863	24.3069	23.6729
CDC123	-0.677264	1.02367e-44	4.89161e-44	None	42.258	73.4473	0.575351	chr10	12237964	12292588	+	ENSG00000151465.9	76.399	76.2903	67.6527	43.6294	44.682	38.4626
CTSL	0.894185	1.0808e-44	5.16048e-44	None	16.9814	10.0728	1.68587	chr9	90340434	90346308	+	ENSG00000135047.10	10.2875	9.22463	10.7062	17.0369	18.6774	15.2298
BCKDHA	0.863287	1.09523e-44	5.22525e-44	None	14.3138	8.57752	1.66875	chr19	41884215	41930910	+	ENSG00000248098.6	8.28682	8.45512	8.99064	13.9728	14.3093	14.6592
GCN1L1	-0.462486	1.17129e-44	5.58373e-44	None	32.4425	47.0433	0.689631	chr12	120565007	120632513	-	ENSG00000089154.6	45.949	47.2718	47.909	32.5581	32.1344	32.635
ECH1	0.685324	1.22676e-44	5.84357e-44	None	43.8034	29.4322	1.48828	chr19	39306062	39322645	-	ENSG00000104823.4	30.1015	30.8407	27.3543	44.3241	43.5762	43.5098
FH	-0.642583	1.22799e-44	5.84483e-44	None	22.7462	38.2971	0.593939	chr1	241660903	241683061	-	ENSG00000091483.6	37.8966	39.703	37.2918	22.9606	24.0006	21.2774
NCAPH	-0.629528	1.58587e-44	7.54227e-44	None	14.5997	23.4896	0.621539	chr2	97001525	97039583	+	ENSG00000121152.5	23.5291	23.3788	23.5608	14.1152	15.3936	14.2903
DUT	-0.661392	1.70718e-44	8.1128e-44	None	18.6614	28.313	0.659112	chr15	48623208	48635570	+	ENSG00000128951.9	28.5239	28.5165	27.8985	18.2794	19.8382	17.8666
NISCH	0.627623	1.84366e-44	8.75448e-44	None	17.0464	12.161	1.40172	chr3	52489134	52527087	+	ENSG00000010322.11	12.2084	12.1431	12.1316	17.0762	17.0072	17.0559
C1orf85	1.15528	1.84605e-44	8.75893e-44	Up	10.9532	5.45068	2.00951	chr1	156259880	156265463	-	ENSG00000198715.7	5.14826	5.19382	6.00996	11.7071	10.4485	10.7039
PSMC5	-0.633941	2.18903e-44	1.03781e-43	None	25.0794	42.1801	0.594581	chr17	61904512	61909379	+	ENSG00000087191.8	41.7822	44.9068	39.8512	24.8802	25.9719	24.3862
CBFA2T2	0.682392	2.43821e-44	1.15504e-43	None	15.1649	9.37283	1.61796	chr20	32077881	32237842	+	ENSG00000078699.17	9.08599	10.1056	8.92694	15.1419	15.5559	14.7969
ATF5	-0.988895	2.46776e-44	1.16812e-43	None	6.77783	14.246	0.475771	chr19	50431959	50437192	+	ENSG00000169136.4	13.512	14.1349	15.091	6.8751	7.45453	6.00387
TMPO	-0.53253	2.48352e-44	1.17466e-43	None	60.1837	87.0248	0.69157	chr12	98909290	98944157	+	ENSG00000120802.9	92.6116	77.7617	90.7012	64.8501	56.7377	58.9635
PSMB7	-0.506703	2.57164e-44	1.21539e-43	None	137.843	211.177	0.652737	chr9	127115745	127177723	-	ENSG00000136930.8	204.372	216.701	212.456	144.658	139.229	129.641
ANO1	0.659918	2.98193e-44	1.4082e-43	None	12.2715	7.57194	1.62065	chr11	69924408	70035634	+	ENSG00000131620.13	8.08289	7.07786	7.55506	10.9393	12.9822	12.8929
SH3GLB1	0.495226	2.99511e-44	1.41332e-43	None	17.8859	15.43	1.15916	chr1	87170259	87213867	+	ENSG00000097033.10	16.1885	15.3769	14.7246	17.6233	18.6504	17.384
ZNF224	0.918483	3.02866e-44	1.42803e-43	None	12.8829	7.74866	1.66259	chr19	44598492	44612479	+	ENSG00000267680.1	7.83729	8.01959	7.38909	13.3389	12.797	12.5128
C8orf44	1.31632	3.17543e-44	1.49607e-43	Up	10.4444	4.41495	2.36568	chr8	67579850	67597799	+	ENSG00000213865.3	4.41838	4.15174	4.67474	10.4126	11.0009	9.91966
EIF3F	0.510403	3.37475e-44	1.58874e-43	None	73.3209	54.6237	1.34229	chr11	7991798	8023409	+	ENSG00000175390.8	42.4924	63.9465	57.4322	62.9074	79.1432	77.9119
ERGIC3	0.481725	3.64171e-44	1.71308e-43	None	182.534	141.972	1.2857	chr20	34129770	34145405	+	ENSG00000125991.14	138.62	145.689	141.607	179.703	186.966	180.933
MICALL1	0.623719	4.11108e-44	1.93237e-43	None	23.7121	17.0241	1.39286	chr22	38301664	38338829	+	ENSG00000100139.9	16.1083	17.0976	17.8663	24.3058	23.0929	23.7376
MAN1A2	0.531944	4.35144e-44	2.04375e-43	None	13.3626	9.90899	1.34854	chr1	117910071	118071494	+	ENSG00000198162.8	10.335	9.45857	9.93338	12.8438	13.9756	13.2686
RRAS	1.0305	4.4289e-44	2.07852e-43	Up	18.8748	9.97358	1.89248	chr19	50138549	50143458	-	ENSG00000126458.3	9.20034	10.9902	9.73016	19.7257	18.8976	18.0012
CDK5RAP3	0.605993	4.85162e-44	2.27514e-43	None	26.7776	18.5145	1.44631	chr17	46045176	46059140	+	ENSG00000108465.10	17.9538	18.846	18.7436	27.3476	26.4173	26.5681
NHLRC3	0.864838	5.00625e-44	2.34583e-43	None	11.2953	6.61464	1.70763	chr13	39612443	39624246	+	ENSG00000188811.8	6.64396	6.62785	6.5721	11.7911	10.9538	11.1411
PSMA7	-0.644058	5.03131e-44	2.35575e-43	None	65.6647	110.747	0.592923	chr20	60711791	60718496	-	ENSG00000101182.10	109.36	112.874	110.008	68.109	70.2777	58.6073
ZNF146	-0.549676	5.47161e-44	2.55992e-43	None	24.6773	35.4517	0.696082	chr19	36705504	36729676	+	ENSG00000167635.7	35.4586	35.5573	35.3392	24.2625	25.5564	24.2129
RBM39	0.431312	6.24145e-44	2.91783e-43	None	137.374	107.698	1.27554	chr20	34291531	34330234	-	ENSG00000131051.16	107.627	107.492	107.977	138.632	137.654	135.836
ARHGEF2	0.65153	6.73386e-44	3.14559e-43	None	20.3518	12.814	1.58824	chr1	155916630	155976861	-	ENSG00000116584.13	12.3914	12.7068	13.3438	20.106	20.9087	20.0406
CES2	0.745729	6.86733e-44	3.20546e-43	None	10.6354	6.97776	1.52419	chr16	66968347	66978999	+	ENSG00000172831.7	7.09326	6.99411	6.84591	11.3005	9.97769	10.6281
CAV1	0.462999	7.4131e-44	3.45754e-43	None	285.452	219.717	1.29918	chr7	116164839	116201233	+	ENSG00000105974.7	227.518	216.222	215.411	293.161	296.09	267.106
DCAF13	-0.645914	7.797e-44	3.63379e-43	None	12.3578	22.5432	0.548181	chr8	104426942	104455681	+	ENSG00000164934.9	24.5987	22.1379	20.893	12.7752	12.8255	11.4725
FEZ2	0.636499	9.47359e-44	4.41176e-43	None	27.2839	19.3451	1.41038	chr2	36778570	36873230	-	ENSG00000171055.10	19.4535	19.7223	18.8593	26.4967	28.1492	27.2056
TPM3	-0.451683	1.09352e-43	5.0885e-43	None	74.7522	110.753	0.674948	chr1	154127784	154167124	-	ENSG00000143549.15	120.741	106.606	104.91	71.9569	82.7021	69.5975
HIST1H3B	-0.559254	1.13152e-43	5.26125e-43	None	114.564	182.425	0.628004	chr6	26031817	26032288	-	ENSG00000124693.2	179.071	182.949	185.255	116.376	112.978	114.337
PCM1	0.457377	1.15475e-43	5.36516e-43	None	27.4337	20.785	1.31988	chr8	17780349	17885478	+	ENSG00000078674.13	21.2338	20.6723	20.4491	26.7491	27.9898	27.5622
IP6K2	0.680306	1.17777e-43	5.46788e-43	None	30.452	19.6103	1.55286	chr3	48725436	48777786	-	ENSG00000068745.10	19.2041	20.5266	19.1003	30.0911	29.7407	31.5242
PSMD3	-0.496064	1.21119e-43	5.61872e-43	None	52.969	80.3831	0.658957	chr17	38137050	38154213	+	ENSG00000108344.10	77.5628	82.2519	81.3345	52.5548	54.3205	52.0315
PYGB	-0.48415	1.23665e-43	5.73244e-43	None	21.2097	31.829	0.666364	chr20	25228705	25278650	+	ENSG00000100994.7	31.6052	31.8326	32.0492	21.1273	21.4479	21.0538
DAG1	0.550159	1.26593e-43	5.86368e-43	None	42.048	32.485	1.29438	chr3	49506146	49573048	+	ENSG00000173402.7	29.7125	33.0234	34.7189	41.2432	43.6639	41.2369
CYP1B1	0.679413	1.35089e-43	6.25239e-43	None	28.3608	19.1187	1.48341	chr2	38294116	38337044	-	ENSG00000138061.7	19.1235	17.6096	20.623	28.8634	29.3523	26.8667
FAM160B1	0.668601	1.42289e-43	6.58061e-43	None	10.413	7.09266	1.46814	chr10	116581503	116659591	+	ENSG00000151553.10	7.27611	6.66273	7.33915	10.2467	10.6449	10.3476
RBMS2	0.714671	1.43613e-43	6.63673e-43	None	31.9274	18.2608	1.74841	chr12	56915713	56984745	+	ENSG00000076067.7	17.5573	18.2909	18.9342	34.8094	32.137	28.8357
TMEM33	-0.576286	1.48315e-43	6.84881e-43	None	17.8476	30.874	0.578078	chr4	41937137	41962589	+	ENSG00000109133.8	30.7723	35.283	26.5667	19.3892	16.5598	17.5937
RRP36	-0.783303	1.59194e-43	7.34556e-43	None	15.0647	27.7449	0.542972	chr6	42989383	43001894	+	ENSG00000124541.6	27.7921	28.561	26.8818	15.2256	15.0419	14.9266
SBDS	-0.921217	1.60193e-43	7.38601e-43	None	12.8201	26.1649	0.489975	chr7	66452664	66460588	-	ENSG00000126524.5	28.0387	25.775	24.681	13.0101	14.154	11.2963
CTU2	-1.00595	2.54062e-43	1.17051e-42	Down	4.9728	10.776	0.461469	chr16	88772871	88781794	+	ENSG00000174177.8	10.824	10.8285	10.6756	5.08274	4.88107	4.9546
ODF2L	0.88727	2.74138e-43	1.26204e-42	None	13.7713	7.47247	1.84294	chr1	86814344	86862023	-	ENSG00000122417.11	7.42559	7.39299	7.59884	12.7854	14.0296	14.4989
DDX55	-0.743534	2.75446e-43	1.26709e-42	None	7.82675	13.8242	0.566163	chr12	124086624	124105488	+	ENSG00000111364.11	14.0704	13.5475	13.8547	7.61271	8.38049	7.48704
DMXL1	0.615344	2.79419e-43	1.28439e-42	None	14.4466	9.76391	1.4796	chr5	118373467	118584833	+	ENSG00000172869.10	10.738	8.62673	9.92701	14.336	14.7554	14.2485
POLD4	1.46924	3.13865e-43	1.44163e-42	Up	11.1897	4.18665	2.6727	chr11	67118248	67124443	-	ENSG00000175482.4	3.25105	5.15913	4.14978	12.5587	10.5333	10.4769
UTP18	-0.90739	3.32029e-43	1.5239e-42	None	10.8099	21.1494	0.51112	chr17	49337889	49375297	+	ENSG00000011260.9	21.4715	21.2766	20.7001	11.0831	12.1879	9.15866
KIF18B	-0.578599	3.41844e-43	1.56776e-42	None	19.0325	29.9217	0.636079	chr17	43002077	43025082	-	ENSG00000186185.9	27.8173	31.155	30.7926	19.1736	19.1624	18.7617
TTC32	1.03782	3.88421e-43	1.78002e-42	Up	19.5662	10.1756	1.92287	chr2	20096404	20101747	-	ENSG00000183891.5	9.66639	10.3379	10.5224	19.5105	20.5549	18.6332
SLC38A10	0.656779	3.9494e-43	1.80852e-42	None	34.101	24.0312	1.41903	chr17	79218800	79269347	-	ENSG00000157637.8	22.6111	24.9188	24.5638	33.9699	33.0825	35.2504
NARS	-0.547859	4.02384e-43	1.84121e-42	None	28.2074	43.749	0.644755	chr18	55267888	55289445	-	ENSG00000134440.7	44.9465	44.3812	41.9192	29.492	28.1816	26.9485
MRPL41	-0.851485	4.07072e-43	1.85985e-42	None	9.84062	19.19	0.5128	chr9	140445651	140447007	+	ENSG00000182154.7	19.5766	19.1083	18.885	9.77936	10.051	9.69152
CMTM4	-0.517204	4.06822e-43	1.85985e-42	None	21.6833	33.4075	0.649053	chr16	66648653	66730610	-	ENSG00000183723.8	33.381	31.946	34.8955	22.8646	20.9123	21.2729
NT5E	-0.61345	4.13898e-43	1.8896e-42	None	16.9582	28.1868	0.601637	chr6	86159809	86205500	+	ENSG00000135318.7	29.4043	27.3161	27.8401	17.3252	17.8272	15.7223
MAD2L1	-0.822645	4.17011e-43	1.90238e-42	None	7.43814	15.5347	0.478808	chr4	120976763	120988229	-	ENSG00000164109.9	17.6505	14.7943	14.1593	8.01944	7.96471	6.33027
USP53	0.64429	5.05572e-43	2.30464e-42	None	11.2238	8.53034	1.31575	chr4	120133742	120216672	+	ENSG00000145390.7	7.80098	10.2101	7.5799	11.1952	11.2949	11.1814
YKT6	-0.493566	5.5076e-43	2.50874e-42	None	34.048	57.3892	0.593283	chr7	44240567	44253893	+	ENSG00000106636.3	58.8074	54.7352	58.6249	34.6301	32.2919	35.2221
TGFBR2	0.479477	5.75252e-43	2.61833e-42	None	21.736	16.8434	1.29048	chr3	30647994	30735634	+	ENSG00000163513.13	16.6587	16.8465	17.025	21.9308	22.3286	20.9487
DSCC1	-0.859805	5.80118e-43	2.63849e-42	None	7.12956	13.9023	0.512832	chr8	120846216	120868250	-	ENSG00000136982.5	14.8075	13.7002	13.1993	7.42964	7.02775	6.93129
TTC4	-0.966865	5.93614e-43	2.69784e-42	None	7.64565	15.8037	0.483789	chr1	55181495	55208330	+	ENSG00000243725.2	16.1581	15.9482	15.3047	8.81644	7.51383	6.60668
EIF3L	0.406652	6.8632e-43	3.11682e-42	None	79.9926	69.1196	1.15731	chr22	38244875	38285414	+	ENSG00000100129.13	71.7401	70.331	65.2877	87.9318	77.1106	74.9354
PPAT	-0.804711	7.54951e-43	3.42592e-42	None	6.5609	12.33	0.532109	chr4	57259528	57301781	-	ENSG00000128059.4	13.2723	11.6894	12.0283	6.49578	6.95599	6.23093
FRRS1	0.773125	7.6539e-43	3.47069e-42	None	10.5888	6.78654	1.56026	chr1	100174259	100232187	-	ENSG00000156869.8	6.79638	7.02485	6.5384	10.8075	10.5417	10.4171
NHP2	-0.721813	8.45363e-43	3.83045e-42	None	25.4272	44.9828	0.565266	chr5	177576461	177580968	-	ENSG00000145912.4	44.6786	45.0973	45.1723	26.5393	26.2991	23.4434
YDJC	-0.842687	8.48073e-43	3.83985e-42	None	8.87	17.5341	0.505872	chr22	21982378	21984353	-	ENSG00000161179.9	16.9893	18.1108	17.5022	9.17991	8.77334	8.65675
DIAPH3	-0.587179	8.51083e-43	3.85059e-42	None	11.0505	16.4371	0.672289	chr13	60239717	60738121	-	ENSG00000139734.13	17.9732	16.5234	14.8146	11.9987	11.8285	9.32416
SH3RF2	-0.743791	9.00636e-43	4.07174e-42	None	6.57968	12.4938	0.526635	chr5	145316142	145461354	+	ENSG00000156463.13	12.4042	12.1458	12.9315	6.85203	6.16032	6.7267
EMP1	0.446784	9.66573e-43	4.36657e-42	None	229.217	182.051	1.25908	chr12	13349650	13369708	+	ENSG00000134531.5	181.755	185.372	179.027	232.319	241.312	214.021
NAE1	-0.607654	1.0536e-42	4.75618e-42	None	28.7566	44.5383	0.64566	chr16	66836778	66907159	-	ENSG00000159593.10	45.4924	44.6544	43.468	30.6862	28.7566	26.827
HIST1H4H	-0.624932	1.07759e-42	4.86081e-42	None	197.221	364.153	0.541589	chr6	26281283	26285762	-	ENSG00000158406.2	361.535	372.458	358.465	183.677	203.721	204.265
CCNA2	-0.571447	1.19715e-42	5.39611e-42	None	30.1255	48.353	0.623034	chr4	122737599	122745087	-	ENSG00000145386.5	50.7072	46.6905	47.6612	30.9482	31.3186	28.1098
ACTB	-0.429344	1.27179e-42	5.72826e-42	None	1121.05	1668.72	0.671801	chr7	5566782	5603415	-	ENSG00000075624.9	1609.27	1738	1658.89	1121.8	1180.45	1060.89
ZC3H15	-0.577423	1.29617e-42	5.83372e-42	None	39.9914	62.6068	0.638771	chr2	187350883	187374090	+	ENSG00000065548.13	65.5863	61.8053	60.4287	39.6392	42.132	38.203
LPHN2	0.443172	1.55445e-42	6.99097e-42	None	39.4252	30.8968	1.27603	chr1	81771845	82458120	+	ENSG00000117114.15	31.0282	30.3853	31.277	39.3723	38.6282	40.2751
NUP107	-0.583266	1.63337e-42	7.34046e-42	None	19.6452	30.0862	0.652963	chr12	69080514	69136785	+	ENSG00000111581.5	31.2924	30.2058	28.7604	18.97	20.7114	19.2541
PPP1R21	0.686195	1.91713e-42	8.60926e-42	None	14.34	9.58981	1.49533	chr2	48667737	48742525	+	ENSG00000162869.11	9.14784	10.0632	9.55837	13.5476	14.7942	14.678
PAN3	0.601704	2.13548e-42	9.58268e-42	None	15.8126	10.7256	1.47429	chr13	28712643	28869475	+	ENSG00000152520.9	11.0399	10.7558	10.3811	15.8064	15.2525	16.379
POLA2	-0.618126	2.19115e-42	9.82521e-42	None	11.9377	19.4836	0.612702	chr11	65029233	65073060	+	ENSG00000014138.4	19.9517	19.8223	18.6769	12.461	11.9943	11.3577
CHORDC1	-0.6958	2.26638e-42	1.0155e-41	None	10.1712	18.8408	0.53985	chr11	89934328	89956532	-	ENSG00000110172.7	19.4183	18.1726	18.9316	9.67825	10.7438	10.0916
R3HDM1	-0.619021	2.30676e-42	1.03283e-41	None	10.5314	16.7806	0.627595	chr2	136289025	136482840	+	ENSG00000048991.12	16.738	17.0178	16.5861	10.0875	10.9578	10.549
ARPC5L	-0.690878	2.35201e-42	1.05231e-41	None	23.7983	41.2921	0.576339	chr9	127624409	127640003	+	ENSG00000136950.9	42.939	40.7832	40.1543	24.1891	25.4903	21.7154
HIST1H4C	-0.543861	2.67071e-42	1.19401e-41	None	245.882	387.501	0.634532	chr6	26104104	26104518	+	ENSG00000197061.3	387.514	391.486	383.502	234.511	255.623	247.51
CS	-0.395213	3.0988e-42	1.38438e-41	None	70.7122	97.8832	0.722414	chr12	56665483	56694176	-	ENSG00000062485.14	95.9095	96.7546	100.985	71.0811	73.5274	67.528
TM9SF2	0.524908	3.1267e-42	1.39581e-41	None	48.865	36.6423	1.33357	chr13	100153671	100216260	+	ENSG00000125304.8	37.5422	35.4032	36.9815	50.9123	50.2692	45.4136
TUSC3	0.48025	3.35733e-42	1.49766e-41	None	63.0311	47.8835	1.31634	chr8	15274724	15624158	+	ENSG00000104723.16	48.2765	47.1762	48.1978	59.2752	65.6567	64.1616
KDM3A	0.563361	3.81763e-42	1.70173e-41	None	17.3823	12.696	1.36912	chr2	86667770	86719839	+	ENSG00000115548.12	13.3855	12.27	12.4325	17.3755	17.1729	17.5985
ITGBL1	0.694926	4.2781e-42	1.90559e-41	None	17.3406	11.18	1.55103	chr13	102104966	102375456	+	ENSG00000198542.9	11.0217	11.1622	11.3562	17.3405	16.8473	17.8339
PIK3CA	0.536946	4.32846e-42	1.9266e-41	None	13.7287	9.50267	1.44472	chr3	178865902	178957881	+	ENSG00000121879.3	9.59456	9.53321	9.38025	13.928	13.8272	13.4307
EGFR	0.379262	4.424e-42	1.96767e-41	None	727.802	584.707	1.24473	chr7	55086714	55324313	+	ENSG00000146648.11	583.154	576.416	594.552	720.422	725.246	737.739
E2F1	-0.762393	4.73355e-42	2.1038e-41	None	9.76701	17.893	0.545857	chr20	32263489	32274210	-	ENSG00000101412.9	16.719	18.2768	18.6832	10.3581	9.60909	9.33382
RNF24	0.501248	4.86812e-42	2.16202e-41	None	17.8307	13.9249	1.28048	chr20	3907956	3996229	-	ENSG00000101236.12	13.6694	13.3581	14.7473	17.028	19.0836	17.3804
CD44	-0.464483	5.21349e-42	2.3137e-41	None	51.2251	79.0124	0.648317	chr11	35160417	35253949	+	ENSG00000026508.12	79.1099	79.634	78.2933	51.9898	49.8715	51.8141
HIST1H2AC	0.550592	5.26944e-42	2.33682e-41	None	71.0228	54.4077	1.30538	chr6	26124373	26139344	+	ENSG00000180573.8	51.9621	59.019	52.242	66.8517	71.9952	74.2214
CDCA2	-0.505255	5.45518e-42	2.41741e-41	None	17.1726	26.2126	0.65513	chr8	25316513	25365436	+	ENSG00000184661.9	26.4634	25.8486	26.3257	17.201	17.3748	16.9421
DDX24	-0.587258	7.13737e-42	3.16054e-41	None	13.8315	24.2326	0.57078	chr14	94517266	94547591	-	ENSG00000089737.11	26.9895	23.2645	22.4438	14.2511	13.7227	13.5207
ARHGAP5	0.47473	7.16319e-42	3.16965e-41	None	35.897	35.2425	1.01857	chr14	32545320	32628934	+	ENSG00000100852.8	38.8832	25.9948	40.8495	41.0767	34.0745	32.5399
GALNS	0.861726	7.5213e-42	3.32567e-41	None	12.2783	7.35041	1.67043	chr16	88880142	88923378	-	ENSG00000141012.8	7.40903	7.91223	6.72997	12.3894	11.2907	13.1549
GLO1	-0.539612	7.64594e-42	3.37831e-41	None	61.7171	96.8585	0.637188	chr6	38643701	38670917	-	ENSG00000124767.6	99.6156	96.611	94.3489	64.2811	64.4631	56.407
LSM12	-0.721087	8.10648e-42	3.57918e-41	None	20.1692	34.4734	0.585068	chr17	42112003	42144987	-	ENSG00000161654.5	34.0106	35.2706	34.1389	21.7273	19.6265	19.1539
MRPL36	-0.949428	8.22866e-42	3.63047e-41	None	15.1377	31.9539	0.473735	chr5	1798500	1801480	-	ENSG00000171421.8	30.9883	33.0733	31.8002	15.4991	15.5905	14.3235
ABL2	-0.516377	8.25374e-42	3.63887e-41	None	8.66619	14.3405	0.604316	chr1	179068462	179198819	-	ENSG00000143322.15	12.1458	15.2248	15.6509	7.81014	9.3975	8.79092
HJURP	-0.515168	9.65256e-42	4.25248e-41	None	24.5319	38.298	0.640552	chr2	234742062	234763212	-	ENSG00000123485.7	38.4787	38.5175	37.8978	25.223	25.2588	23.1138
PPIL1	-0.69457	1.01657e-41	4.47527e-41	None	14.23	24.898	0.571529	chr6	36822603	36842800	-	ENSG00000137168.7	25.8353	24.7067	24.1521	14.2244	14.9594	13.506
UBE3B	0.546606	1.07227e-41	4.71706e-41	None	16.9554	12.3339	1.37469	chr12	109915207	109974507	+	ENSG00000151148.9	11.971	12.4612	12.5695	18	16.8738	15.9923
DIMT1	-0.723394	1.08736e-41	4.77995e-41	None	10.4482	17.2462	0.605822	chr5	61683081	61699766	-	ENSG00000086189.5	17.7137	17.3197	16.7052	10.5081	10.965	9.87143
PSMC2	-0.624099	1.14433e-41	5.02672e-41	None	30.6313	51.1527	0.598821	chr7	102984701	103009842	+	ENSG00000161057.6	52.3418	51.8639	49.2524	31.2628	32.6391	27.992
SPATA20	0.829883	1.32244e-41	5.8049e-41	None	10.0772	6.12588	1.64503	chr17	48620419	48633213	+	ENSG00000006282.15	6.05786	5.99576	6.32401	10.5297	9.67482	10.0272
FZD6	0.560946	1.41004e-41	6.18495e-41	None	24.4252	17.6912	1.38064	chr8	104310661	104345094	+	ENSG00000164930.7	18.7562	17.0736	17.2438	25.6191	23.6658	23.9906
PLEKHM1	0.784325	1.64295e-41	7.2013e-41	None	10.2518	6.19181	1.6557	chr17	43513266	43568115	-	ENSG00000225190.4	5.95906	5.7539	6.86248	10.2526	9.76317	10.7397
ETHE1	0.681276	1.68884e-41	7.39709e-41	None	54.7014	36.6144	1.49399	chr19	44010871	44031396	-	ENSG00000105755.3	35.3016	37.6528	36.8888	56.535	52.5044	55.0649
PRKAR1B	-0.918969	1.73081e-41	7.57545e-41	None	5.50839	11.1498	0.494037	chr7	588834	767287	-	ENSG00000188191.10	11.068	11.3542	11.0271	6.1007	5.21568	5.20879
DENND1B	0.604644	1.92732e-41	8.4294e-41	None	18.2852	12.3302	1.48297	chr1	197473878	197744826	-	ENSG00000213047.7	12.8513	12.572	11.5672	18.2421	17.7196	18.894
BCL2L13	0.50104	1.97562e-41	8.63442e-41	None	30.4067	24.2876	1.25194	chr22	18111621	18213388	+	ENSG00000099968.13	23.9941	24.6936	24.1751	30.4642	30.467	30.2887
DNAJA3	-0.627475	2.21905e-41	9.69128e-41	None	17.3461	28.846	0.601335	chr16	4475806	4506776	+	ENSG00000103423.9	30.5487	28.796	27.1933	17.4914	17.1578	17.3892
IMP3	-0.664727	2.47997e-41	1.0823e-40	None	12.0452	20.4539	0.588897	chr15	75931426	75941047	-	ENSG00000177971.7	20.5507	19.9917	20.8192	12.4312	12.2554	11.4491
PLSCR1	0.570482	2.86589e-41	1.24982e-40	None	48.8307	36.7396	1.3291	chr3	146232967	146262651	-	ENSG00000188313.8	37.1978	36.3733	36.6479	47.3255	50.0127	49.154
DUS1L	-0.556909	3.13635e-41	1.36678e-40	None	34.8793	52.9059	0.65927	chr17	80015382	80023763	-	ENSG00000169718.13	52.6854	50.4308	55.6015	36.2341	34.1953	34.2085
DTL	-0.563199	3.23826e-41	1.41017e-40	None	14.7386	24.4276	0.603358	chr1	212208919	212280742	+	ENSG00000143476.13	23.7923	27.5648	21.9256	15.7972	15.1602	13.2583
ILF3	-0.397632	3.26771e-41	1.42197e-40	None	69.0567	98.0032	0.704637	chr19	10764937	10803093	+	ENSG00000129351.13	98.8776	99.2303	95.9017	67.6641	72.6672	66.8389
C1orf109	-0.826747	3.43815e-41	1.49506e-40	None	7.38443	14.8525	0.497183	chr1	38147242	38157914	-	ENSG00000116922.10	15.924	13.8039	14.8296	7.46903	7.07382	7.61044
ATAD2	-0.442277	3.71274e-41	1.6133e-40	None	33.8941	48.2852	0.701957	chr8	124332090	124428590	-	ENSG00000156802.8	49.7349	47.8221	47.2986	33.5983	33.9339	34.1501
C2orf68	0.62957	3.76153e-41	1.63333e-40	None	35.1075	24.8107	1.41502	chr2	85833777	85839189	-	ENSG00000168887.6	23.4672	25.2649	25.6999	36.073	36.3916	32.858
SRRT	-0.556123	3.94446e-41	1.71153e-40	None	20.2986	30.7765	0.659551	chr7	100472733	100486285	+	ENSG00000087087.14	30.7849	31.1581	30.3864	20.799	19.2799	20.817
DNTTIP2	-0.785617	4.08591e-41	1.77164e-40	None	5.58196	10.9236	0.511001	chr1	94333373	94345474	-	ENSG00000067334.9	11.5356	10.4162	10.8189	5.59039	6.11888	5.0366
TNFRSF21	0.415261	4.11996e-41	1.78512e-40	None	124.141	100.596	1.23405	chr6	47199268	47277641	-	ENSG00000146072.6	97.7067	100.989	103.093	123.988	126.265	122.169
MSH6	-0.49921	4.50784e-41	1.95178e-40	None	16.5757	26.2294	0.63195	chr2	47922669	48037240	+	ENSG00000116062.10	25.3168	29.3739	23.9975	16.0081	17.493	16.2258
CD320	-0.932318	4.52391e-41	1.95734e-40	None	10.086	20.5953	0.489722	chr19	8367011	8373240	-	ENSG00000167775.6	19.1824	21.1385	21.465	11.0745	10.2342	8.94926
BUB1	-0.460805	4.77947e-41	2.06643e-40	None	32.5398	47.4782	0.685363	chr2	111395275	111435691	-	ENSG00000169679.10	48.0793	47.399	46.9563	32.4656	34.35	30.8039
C11orf24	-0.953269	5.60084e-41	2.41982e-40	None	6.52864	14.1829	0.460318	chr11	68028803	68039469	-	ENSG00000171067.6	13.5045	14.2786	14.7655	6.2235	7.30957	6.05285
KHSRP	-0.455984	5.64815e-41	2.43851e-40	None	79.3541	114.729	0.691665	chr19	6413359	6424805	-	ENSG00000088247.11	110.737	116.942	116.508	78.0166	80.5619	79.4838
TKT	0.554276	5.87626e-41	2.53519e-40	None	89.6625	67.7952	1.32255	chr3	53258723	53290068	-	ENSG00000163931.11	62.6352	66.9406	73.8098	90.0203	85.7068	93.2604
INADL	0.546533	6.07779e-41	2.62026e-40	None	28.9836	20.5358	1.41137	chr1	62208149	62629592	+	ENSG00000132849.14	21.2882	18.9756	21.3437	28.5263	27.5956	30.8289
WNT7B	0.769543	6.12259e-41	2.63769e-40	None	18.1662	11.4359	1.58852	chr22	46316242	46373009	-	ENSG00000188064.5	10.557	11.3758	12.3749	17.5986	17.8499	19.05
ANP32E	-0.73263	6.55155e-41	2.82048e-40	None	14.9294	25.7324	0.580178	chr1	150190717	150208504	-	ENSG00000143401.10	29.7305	22.3501	25.1167	14.4088	18.415	11.9643
UBE2V2	-0.567829	6.96514e-41	2.9964e-40	None	14.2788	25.1721	0.567249	chr8	48920960	48977268	+	ENSG00000169139.7	27.3984	25.2868	22.831	13.5976	15.6954	13.5434
ADRM1	-0.729211	7.18081e-41	3.08698e-40	None	20.9984	37.4627	0.560515	chr20	60877149	60883918	+	ENSG00000130706.8	34.7301	38.1341	39.524	20.7939	21.0654	21.136
XPR1	0.514169	8.15373e-41	3.50274e-40	None	17.3634	13.7706	1.26091	chr1	180601140	180859387	+	ENSG00000143324.9	14.2171	13.4697	13.6249	17.627	17.141	17.3221
DDX31	-0.664156	8.24866e-41	3.541e-40	None	6.92016	11.9941	0.576966	chr9	135468384	135545788	-	ENSG00000125485.13	12.3682	12.0135	11.6004	6.98191	6.78456	6.99402
SCD5	0.578169	9.25721e-41	3.97113e-40	None	21.0457	15.1746	1.38691	chr4	83550692	83720010	-	ENSG00000145284.7	15.2125	15.0631	15.2483	20.5091	22.1712	20.4569
G3BP1	-0.439631	1.01741e-40	4.36138e-40	None	56.7288	91.322	0.621195	chr5	151150606	151192346	+	ENSG00000145907.10	98.6555	89.7819	85.5285	65.1333	53.2495	51.8036
TNFRSF12A	-0.709769	1.0895e-40	4.66708e-40	None	25.9743	42.6575	0.608904	chr16	3068446	3072384	+	ENSG00000006327.9	39.3836	43.3135	45.2753	28.4593	25.9873	23.4764
TTI1	-0.55459	1.15637e-40	4.95003e-40	None	10.8547	17.2622	0.628813	chr20	36611409	36661870	-	ENSG00000101407.8	16.8779	17.5353	17.3733	10.7697	11.184	10.6103
ZNF185	0.650658	1.46905e-40	6.28405e-40	None	12.2798	8.09116	1.51768	chrX	152082986	152142024	+	ENSG00000147394.14	7.56905	8.15744	8.54698	13.1046	12.3638	11.371
TACC1	0.535934	1.76002e-40	7.52337e-40	None	10.9555	7.58725	1.44393	chr8	38585704	38710546	+	ENSG00000147526.15	8.16884	7.00667	7.58623	10.8814	11.5178	10.4671
FAM35A	-0.675064	1.82037e-40	7.77585e-40	None	8.52267	14.6959	0.579935	chr10	88853918	88951225	+	ENSG00000122376.7	15.5783	14.3005	14.2089	8.65694	8.84116	8.06993
CLTB	-0.711388	1.82437e-40	7.7874e-40	None	21.8585	38.0593	0.574328	chr5	175819456	175843570	-	ENSG00000175416.8	38.0552	37.9313	38.1913	20.4288	22.7916	22.355
TMEM219	0.968696	1.91926e-40	8.18669e-40	None	17.8202	10.198	1.74742	chr16	29952206	29984373	+	ENSG00000149932.12	9.71023	11.137	9.74676	18.6102	17.0899	17.7604
PACS1	0.56078	2.04825e-40	8.73072e-40	None	26.7022	18.959	1.40842	chr11	65837834	66012218	+	ENSG00000175115.7	18.2425	19.1954	19.4392	26.0205	26.4462	27.64
TUBB3	-0.696036	2.17398e-40	9.26011e-40	None	19.6359	34.5996	0.567517	chr16	89987800	90005169	+	ENSG00000258947.2	35.2294	34.7645	33.8049	21.469	20.5017	16.9369
NANS	-0.644571	2.21148e-40	9.41319e-40	None	28.1463	48.0775	0.585437	chr9	100819021	100845357	+	ENSG00000095380.10	46.832	50.7993	46.6012	29.6078	27.7631	27.0681
DDX1	-0.538069	2.47272e-40	1.05178e-39	None	32.2361	48.2769	0.667733	chr2	15731302	15771235	+	ENSG00000079785.10	49.2802	48.1315	47.4189	33.2414	33.5823	29.8845
C12orf5	-1.08297	2.48559e-40	1.05651e-39	Down	5.6877	12.8143	0.443856	chr12	4430371	4462338	+	ENSG00000078237.4	13.5249	12.4176	12.5004	5.47398	5.57348	6.01564
STIL	-0.489938	2.58471e-40	1.09786e-39	None	16.4515	24.7679	0.664226	chr1	47715811	47779819	-	ENSG00000123473.11	25.5081	24.5685	24.2271	16.7531	17.1873	15.414
RHBDF1	0.743842	2.62654e-40	1.11485e-39	None	13.8668	8.81698	1.57274	chr16	108058	126354	-	ENSG00000007384.11	8.60798	8.71453	9.12844	13.4126	14.1002	14.0878
ACTL6A	-0.571374	3.426e-40	1.45316e-39	None	37.9276	59.727	0.635016	chr3	179280668	179306196	+	ENSG00000136518.12	61.3496	58.3378	59.4937	39.7511	38.373	35.6588
C14orf159	0.799458	3.60846e-40	1.52948e-39	None	14.2892	8.59029	1.66342	chr14	91526677	91691976	+	ENSG00000133943.16	8.30852	8.35828	9.10407	14.6862	14.4262	13.7553
ZNF514	0.689033	4.53924e-40	1.92265e-39	None	11.0429	8.24092	1.34001	chr2	95813075	95831158	-	ENSG00000144026.7	8.00137	8.57707	8.14433	10.7928	11.8409	10.4952
USP7	-0.515463	4.83724e-40	2.04744e-39	None	18.8196	26.5358	0.709217	chr16	8985951	9058371	-	ENSG00000187555.10	27.1617	26.9888	25.4569	18.3649	18.9323	19.1617
LRBA	0.421918	5.33143e-40	2.25503e-39	None	21.2055	15.6368	1.35613	chr4	151185594	151936879	-	ENSG00000198589.6	16.0256	15.3892	15.4957	25.7856	19.1736	18.6575
GCSH	-0.741671	6.63364e-40	2.80386e-39	None	19.715	38.664	0.509904	chr16	81115566	81130008	-	ENSG00000140905.5	41.7853	38.5152	35.6917	20.1577	20.585	18.4022
KIAA1522	0.632381	8.5227e-40	3.5998e-39	None	83.6023	58.7259	1.4236	chr1	33207486	33240571	+	ENSG00000162522.6	54.3583	59.2566	62.5628	83.2849	81.0573	86.4648
FAF1	-0.461933	8.57531e-40	3.61949e-39	None	23.2418	33.7513	0.688619	chr1	50905150	51425935	-	ENSG00000185104.15	34.163	34.1162	32.9747	23.961	23.2557	22.5086
RC3H1	0.514749	8.71499e-40	3.67587e-39	None	13.0999	9.88364	1.32541	chr1	173900352	173991435	-	ENSG00000135870.7	10.1301	9.73225	9.78855	12.4788	13.3072	13.5136
TANK	0.705649	9.05593e-40	3.81702e-39	None	27.8229	16.1356	1.72431	chr2	161993419	162092732	+	ENSG00000136560.9	16.14	17.0137	15.2532	27.0873	28.8866	27.4948
CSNK1D	0.469515	9.58207e-40	4.03596e-39	None	81.1855	64.7302	1.25421	chr17	80196899	80231607	-	ENSG00000141551.10	62.8658	64.83	66.4949	81.2222	81.386	80.9484
KIAA0556	0.60402	1.02032e-39	4.29457e-39	None	10.0654	7.30667	1.37757	chr16	27561454	27791690	+	ENSG00000047578.8	7.3239	7.43239	7.16372	10.0838	10.1758	9.93668
CTNNBIP1	0.777862	1.05941e-39	4.456e-39	None	14.2342	8.89823	1.59967	chr1	9908334	9970394	-	ENSG00000178585.10	8.91718	8.49144	9.28608	12.3753	13.3375	16.9898
CLN6	-0.610017	1.09545e-39	4.60441e-39	None	17.9634	29.6913	0.605007	chr15	68499330	68549549	-	ENSG00000128973.7	28.4865	30.5964	29.9909	17.9876	18.6438	17.2589
SORD	-0.642033	1.10583e-39	4.64478e-39	None	6.47741	10.9569	0.591172	chr15	45315302	45369383	+	ENSG00000140263.9	10.4292	11.3775	11.064	6.29507	6.51957	6.61758
SCO1	-0.633435	1.13434e-39	4.76123e-39	None	23.1784	37.9411	0.610905	chr17	10583654	10601692	-	ENSG00000133028.6	38.1379	38.4357	37.2498	22.1734	25.3224	22.0395
KMT2C	0.447985	1.34902e-39	5.65837e-39	None	12.0835	9.31929	1.29661	chr7	151832010	152133090	-	ENSG00000055609.13	9.28177	9.45313	9.22296	12.3593	11.8592	12.032
IDI1	-0.795046	1.4796e-39	6.2018e-39	None	11.0057	19.8494	0.554458	chr10	1085848	1095110	-	ENSG00000067064.6	21.0625	18.7776	19.7082	11.4067	11.6436	9.96678
STARD13	0.587198	1.50753e-39	6.3145e-39	None	11.8293	7.6794	1.5404	chr13	33677272	33924767	-	ENSG00000133121.16	7.75851	7.57022	7.70948	11.9532	11.4861	12.0487
ELF1	0.580345	1.73155e-39	7.24777e-39	None	21.7972	15.3932	1.41603	chr13	41506056	41635576	-	ENSG00000120690.9	15.4145	15.9325	14.8326	20.5117	24.2377	20.6421
ITPRIPL2	-0.488457	1.73468e-39	7.25586e-39	None	12.7688	19.1009	0.668492	chr16	19125254	19132946	+	ENSG00000205730.5	19.0483	18.559	19.6954	12.9915	12.4545	12.8603
GNAS	0.383511	1.86015e-39	7.77529e-39	None	196.465	158.167	1.24214	chr20	57414773	57486247	+	ENSG00000087460.19	153.215	162.701	158.583	198.845	201.586	188.965
UBE2G2	-0.833806	1.92629e-39	8.04619e-39	None	5.99553	11.9633	0.50116	chr21	46188955	46221934	-	ENSG00000184787.14	13.0695	11.351	11.4694	5.92421	5.84772	6.21466
MON1B	0.518161	1.97266e-39	8.23417e-39	None	12.8191	9.85831	1.30034	chr16	77224732	77236302	+	ENSG00000103111.10	9.40565	10.1915	9.97782	13.4962	12.5074	12.4538
KLHL5	0.585885	1.97975e-39	8.25806e-39	None	18.5068	13.3999	1.38111	chr4	39046659	39128477	+	ENSG00000109790.12	13.759	12.9818	13.4589	19.3679	18.7844	17.3681
ETV3	0.537722	2.03321e-39	8.47521e-39	None	17.9405	13.0562	1.3741	chr1	157090983	157108266	-	ENSG00000117036.7	12.9959	12.9721	13.2006	17.6375	18.7665	17.4175
SETDB1	0.512322	2.27105e-39	9.46011e-39	None	24.5492	19.0674	1.2875	chr1	150898739	150937213	+	ENSG00000143379.8	18.7427	18.3381	20.1212	25.4485	24.3022	23.8969
EIF5	-0.547312	2.58608e-39	1.07649e-38	None	55.3025	91.0015	0.607709	chr14	103799881	103811362	+	ENSG00000100664.6	94.2655	86.6882	92.0509	58.907	55.1345	51.8659
CARHSP1	0.68571	3.33478e-39	1.387e-38	None	26.3773	15.7948	1.67	chr16	8946799	8962866	-	ENSG00000153048.6	17.8936	15.6586	13.8322	27.1759	25.9496	26.0064
HCFC1	-0.612305	3.3366e-39	1.387e-38	None	9.83696	16.3274	0.60248	chrX	153213004	153237258	-	ENSG00000172534.9	15.9314	16.0111	17.0398	9.61198	9.72551	10.1734
LDB1	0.63877	3.40232e-39	1.41334e-38	None	22.0204	15.2295	1.44591	chr10	103867317	103880210	-	ENSG00000198728.6	14.4773	15.4493	15.7617	21.9479	22.1063	22.0071
GINS4	-0.784168	3.63639e-39	1.50954e-38	None	6.00608	11.7297	0.512039	chr8	41386725	41402565	+	ENSG00000147536.7	10.9868	12.163	12.0393	6.24396	6.45062	5.32366
PTBP1	-0.412887	4.16969e-39	1.72973e-38	None	87.9142	126.581	0.694527	chr19	797075	812327	+	ENSG00000011304.12	124.031	127.761	127.951	90.5435	90.7174	82.4816
CTSA	0.475496	4.2925e-39	1.77946e-38	None	54.2526	43.7046	1.24135	chr20	44518783	44527459	+	ENSG00000064601.12	41.1141	45.4405	44.5593	54.8287	54.2602	53.6689
MCM8	-0.603026	4.59588e-39	1.90392e-38	None	10.4263	16.9829	0.613925	chr20	5931298	5975852	+	ENSG00000125885.9	17.49	16.4332	17.0255	10.5377	10.6341	10.107
FTSJ2	-0.70342	4.8911e-39	2.02483e-38	None	9.25291	16.4145	0.563705	chr7	2273866	2281840	-	ENSG00000122687.13	16.426	16.6617	16.1557	9.74792	9.231	8.7798
CDV3	-0.475376	5.15218e-39	2.13145e-38	None	90.3505	132.826	0.680215	chr3	133292574	133309105	+	ENSG00000091527.11	143.719	135.667	119.093	95.2798	98.7564	77.0152
CHSY1	-0.673166	5.29215e-39	2.18786e-38	None	7.01303	11.5402	0.607707	chr15	101715928	101792137	-	ENSG00000131873.5	11.4616	11.4269	11.732	6.51517	6.98394	7.53999
HEATR5B	0.514948	5.96638e-39	2.46491e-38	None	12.6384	9.45144	1.33719	chr2	37195526	37311485	-	ENSG00000008869.7	9.78314	9.26039	9.31078	12.4614	13.2567	12.1972
EIF3I	-0.473042	5.98463e-39	2.47076e-38	None	119.008	177.994	0.668608	chr1	32687529	32697205	+	ENSG00000084623.7	172.218	187.039	174.726	117.93	121.477	117.619
TIMM10	-0.923969	6.2039e-39	2.55953e-38	None	14.7344	30.6676	0.480455	chr11	57295936	57298276	-	ENSG00000134809.4	30.5805	31.7439	29.6783	15.7573	14.7446	13.7013
RABGAP1	0.45572	6.45332e-39	2.66062e-38	None	42.3448	31.0249	1.36486	chr9	125703112	125867145	+	ENSG00000011454.12	30.8292	30.5652	31.6804	44.7193	41.5334	40.7817
LRP5	0.591244	6.81769e-39	2.80893e-38	None	17.7	12.9358	1.3683	chr11	68080077	68216743	+	ENSG00000162337.7	12.4408	13.292	13.0745	17.5248	17.3201	18.2551
NIPA2	-0.748845	6.96733e-39	2.86862e-38	None	9.97532	17.2433	0.578506	chr15	23004684	23034427	-	ENSG00000140157.10	16.5943	20.8149	14.3206	9.28881	11.5335	9.10369
DGCR2	0.508555	7.83404e-39	3.22327e-38	None	28.5292	21.8453	1.30597	chr22	19023795	19109967	-	ENSG00000070413.14	21.1595	21.5605	22.8158	29.1772	28.8569	27.5536
NOC4L	-0.952604	8.85105e-39	3.63924e-38	None	5.87549	12.2705	0.478831	chr12	132628993	132637013	+	ENSG00000184967.2	11.7396	13.0463	12.0256	5.79448	5.84152	5.99047
KANSL1	0.543116	9.45162e-39	3.88352e-38	None	15.5297	10.4215	1.49016	chr17	44107282	44302733	-	ENSG00000120071.8	10.614	10.138	10.5125	16.604	14.5145	15.4706
TRIM16L	-0.426587	9.51915e-39	3.90861e-38	None	61.1479	100.889	0.606093	chr17	18601311	18639431	+	ENSG00000108448.16	96.9065	112.421	93.3381	61.0185	61.3702	61.0549
ENOPH1	-0.782922	1.27616e-38	5.23644e-38	None	6.94898	13.047	0.532611	chr4	83351715	83382244	+	ENSG00000145293.10	13.002	12.966	13.173	6.95909	7.29273	6.59512
SEC23B	-0.50875	1.49124e-38	6.11478e-38	None	16.5714	25.258	0.656084	chr20	18488137	18542059	+	ENSG00000101310.10	25.1397	26.2235	24.4109	16.9205	16.8667	15.927
ANXA4	0.609915	1.52789e-38	6.26082e-38	None	18.7827	14.4161	1.3029	chr2	69871557	70053596	+	ENSG00000196975.10	14.7232	15.6092	12.916	19.7829	18.2034	18.3618
TRPM4	0.827223	1.53871e-38	6.30089e-38	None	11.4493	6.99588	1.63658	chr19	49660998	49715093	+	ENSG00000130529.11	6.44533	7.10147	7.44082	10.9272	11.1329	12.2879
STXBP2	0.680425	1.54208e-38	6.31042e-38	None	22.5982	15.3137	1.47569	chr19	7701767	7712759	+	ENSG00000076944.10	14.173	15.1298	16.6382	23.4121	22.6185	21.764
ANAPC1	-0.457038	1.64886e-38	6.74278e-38	None	15.5506	22.7569	0.683336	chr2	112523848	112642267	-	ENSG00000153107.7	23.2937	22.2565	22.7205	15.5842	15.7635	15.3041
UBQLN4	-0.51539	1.74829e-38	7.14457e-38	None	19.2349	29.7621	0.64629	chr1	156005092	156023585	-	ENSG00000160803.7	29.7235	29.9985	29.5643	18.7233	19.3663	19.6152
IPO5	-0.415575	1.76589e-38	7.21163e-38	None	65.018	72.0203	0.902773	chr13	98605912	98676551	+	ENSG00000065150.14	78.76	71.3706	65.9304	61.5332	67.8349	65.686
NOL8	-0.547741	2.07655e-38	8.47459e-38	None	20.4247	30.6143	0.667164	chr9	95059640	95087918	-	ENSG00000198000.7	32.0053	30.2019	29.6356	20.0518	20.0964	21.126
PCYOX1	0.427865	2.29587e-38	9.3633e-38	None	23.1029	18.5471	1.24563	chr2	70484518	70508323	+	ENSG00000116005.7	18.6894	18.4994	18.4526	23.3473	23.6298	22.3316
ARID4B	0.577787	2.5645e-38	1.04518e-37	None	11.4866	7.81988	1.46889	chr1	235294949	235491534	-	ENSG00000054267.16	7.76988	7.44765	8.2421	11.0256	11.2664	12.1677
LY6E	0.482622	2.59539e-38	1.05706e-37	None	274.503	211.012	1.30089	chr8	144099399	144105249	+	ENSG00000160932.6	198.657	215.287	219.093	284.888	270.042	268.579
UBXN6	0.692465	3.17867e-38	1.29375e-37	None	19.2335	12.9218	1.48845	chr19	4444996	4457819	-	ENSG00000167671.7	12.3838	12.791	13.5905	18.7454	20.0805	18.8745
HNRNPU	-0.390501	3.35885e-38	1.36616e-37	None	73.5113	105.545	0.696494	chr1	245014468	245027844	-	ENSG00000153187.12	106.915	108.377	101.342	73.0364	74.4723	73.0253
GSG2	-0.659424	3.79201e-38	1.5413e-37	None	7.18792	12.2703	0.585796	chr17	3627211	3630067	+	ENSG00000177602.4	12.2546	12.2525	12.3039	7.31449	7.33511	6.91415
WSB1	0.537425	4.14203e-38	1.68244e-37	None	25.0706	20.0924	1.24777	chr17	25621102	25640657	+	ENSG00000109046.10	20.4048	19.3148	20.5575	23.883	25.6355	25.6931
NAA50	-0.469872	4.65331e-38	1.88884e-37	None	39.1796	68.7038	0.570268	chr3	113435307	113465147	-	ENSG00000121579.8	58.1447	69.1745	78.7921	47.084	34.9075	35.5473
SLC35A3	0.682495	4.95203e-38	2.00875e-37	None	13.2052	9.00357	1.46666	chr1	100435345	100492535	+	ENSG00000117620.8	9.40532	8.35774	9.24764	13.8293	13.3943	12.3919
EI24	-0.441228	5.29886e-38	2.14799e-37	None	65.3273	104.398	0.625753	chr11	125439112	125454575	+	ENSG00000149547.10	101.852	104.166	107.175	75.2329	63.2258	57.5231
LMBR1L	0.946035	5.47077e-38	2.21619e-37	None	11.2114	5.77586	1.94107	chr12	49490919	49504683	-	ENSG00000139636.11	5.39581	5.70985	6.22192	10.8226	10.9559	11.8556
AGL	0.5469	6.43074e-38	2.60333e-37	None	10.4328	7.65709	1.3625	chr1	100315640	100389579	+	ENSG00000162688.11	7.846	7.29875	7.82652	10.5559	10.6031	10.1395
ATP5G3	-0.575991	6.4831e-38	2.62277e-37	None	28.3028	48.5018	0.583541	chr2	176040986	176049335	-	ENSG00000154518.5	55.2667	40.8074	49.4311	21.804	36.9666	26.1377
PREB	-0.58959	6.58056e-38	2.66041e-37	None	19.5667	33.2542	0.588396	chr2	27353624	27357543	-	ENSG00000138073.9	31.1846	34.8035	33.7746	20.8089	19.3343	18.5568
TMEM39A	0.600417	7.40324e-38	2.99101e-37	None	13.6458	8.5982	1.58705	chr3	119148347	119187677	-	ENSG00000176142.8	8.69627	8.62933	8.469	14.916	13.0225	12.9988
CHMP1B	0.486216	9.15713e-38	3.69713e-37	None	41.8605	32.2783	1.29686	chr18	11851395	11854448	+	ENSG00000255112.2	32.2537	32.5856	31.9955	41.6454	44.625	39.3112
HNRNPC	-0.41378	9.59269e-38	3.8704e-37	None	164.814	251.572	0.655137	chr14	21677295	21737653	-	ENSG00000092199.13	258.017	247.676	249.021	170.914	169.74	153.788
CLUH	-0.52003	9.87055e-38	3.97985e-37	None	19.5092	30.4245	0.641232	chr17	2592680	2615957	-	ENSG00000132361.12	29.1069	31.2396	30.927	19.7766	19.1642	19.5867
STAU2	0.54529	1.09439e-37	4.40969e-37	None	19.4799	13.904	1.40104	chr8	74332604	74659943	-	ENSG00000040341.13	13.7969	13.9463	13.9687	19.8149	19.4187	19.2062
RBM5	0.53864	1.22143e-37	4.91828e-37	None	28.5245	21.7562	1.3111	chr3	50126341	50156454	+	ENSG00000003756.12	22.244	21.2377	21.7868	29.4579	27.5796	28.5361
CASC5	-0.503944	1.2351e-37	4.97004e-37	None	7.3914	10.9411	0.675562	chr15	40886218	40956540	+	ENSG00000137812.15	11.383	10.513	10.9273	7.45375	7.59245	7.12801
MAPK3	0.680706	1.36696e-37	5.49695e-37	None	21.9534	14.7973	1.48361	chr16	30125426	30134827	-	ENSG00000102882.7	14.0408	15.4525	14.8985	22.3759	21.9041	21.5802
PSMA3	-0.598197	1.40602e-37	5.65027e-37	None	58.7531	100.428	0.585028	chr14	58711549	58738730	+	ENSG00000100567.8	99.2093	108.706	93.3679	60.2626	64.6364	51.3602
MTCH2	-0.53737	1.41966e-37	5.70128e-37	None	47.8686	63.9472	0.748564	chr11	47638867	47664175	-	ENSG00000109919.5	67.7614	63.9641	60.1162	58.2143	42.5383	42.8532
DBN1	-0.629855	1.4629e-37	5.87104e-37	None	11.393	18.691	0.609545	chr5	176883609	176901402	-	ENSG00000113758.9	18.0117	19.1022	18.9592	10.9935	11.5204	11.6651
PPIA	-0.463792	1.4673e-37	5.88479e-37	None	362.849	558.131	0.650114	chr7	44836279	44864163	+	ENSG00000196262.9	548.235	593.523	532.636	386.538	371.362	330.647
RARG	0.687686	1.51851e-37	6.08614e-37	None	20.9696	13.5464	1.54798	chr12	53604354	53626764	-	ENSG00000172819.12	12.5374	14.3197	13.7821	20.5278	21.4015	20.9795
TUFM	-0.405509	1.5428e-37	6.17938e-37	None	65.1279	93.6868	0.695167	chr16	28853732	28857729	-	ENSG00000178952.4	92.7405	94.374	93.9458	67.1148	65.8741	62.3948
EIF4G1	-0.378626	1.63101e-37	6.52835e-37	None	184.894	251.495	0.735181	chr3	184032283	184053146	+	ENSG00000114867.15	245.841	258.194	250.449	190.14	183.052	181.491
SFXN4	-0.798095	1.86548e-37	7.46191e-37	None	10.1809	19.1492	0.531659	chr10	120900279	120925179	-	ENSG00000183605.12	19.7222	19.2297	18.4959	10.1143	10.5794	9.84892
ANKRD52	-0.430842	1.94983e-37	7.79417e-37	None	23.3629	33.1519	0.704722	chr12	56631591	56652175	-	ENSG00000139645.9	32.9193	33.4625	33.0739	22.4244	24.1891	23.4751
TRA2B	-0.38992	2.23172e-37	8.91506e-37	None	67.7981	102.967	0.658444	chr3	185633694	185655924	-	ENSG00000136527.13	106.918	102.238	99.7448	67.8075	68.8911	66.6956
CELF1	-0.401363	2.55154e-37	1.01859e-36	None	47.4148	64.647	0.733441	chr11	47487496	47587121	-	ENSG00000149187.13	66.5244	62.8077	64.6088	48.3098	46.8134	47.121
VDAC3	-0.464577	2.57222e-37	1.02617e-36	None	68.2776	100.716	0.677925	chr8	42249142	42263415	+	ENSG00000078668.9	103.182	99.758	99.2067	68.0402	71.0756	65.717
OSBP2	-0.510106	2.60725e-37	1.03946e-36	None	20.6632	32.7147	0.631618	chr22	31089769	31303811	+	ENSG00000184792.11	31.3093	33.3501	33.4847	21.1326	20.5645	20.2924
HPRT1	-0.638993	2.83092e-37	1.12789e-36	None	29.1221	48.9499	0.594936	chrX	133594183	133654543	+	ENSG00000165704.10	50.643	48.081	48.1258	29.41	31.6166	26.3396
SCP2	0.540132	2.91795e-37	1.16179e-36	None	31.8681	21.6289	1.4734	chr1	53392901	53517375	+	ENSG00000116171.12	26.1241	20.1304	18.6323	37.0701	23.8733	34.6608
TXNDC5	-0.410281	3.33389e-37	1.32653e-36	None	35.7295	51.2248	0.697505	chr6	7881483	8026646	-	ENSG00000239264.4	51.2777	51.6758	50.7208	36.2202	36.6266	34.3417
NCEH1	-0.663884	3.35209e-37	1.33289e-36	None	6.24792	11.2655	0.554606	chr3	172348039	172429008	-	ENSG00000144959.5	11.706	11.0712	11.0194	6.66083	6.26573	5.8172
LPCAT2	0.559729	3.86847e-37	1.53721e-36	None	18.1469	12.905	1.40619	chr16	55542910	55620582	+	ENSG00000087253.7	12.6952	12.8836	13.1362	18.5564	18.9959	16.8885
PLXNA1	0.619562	4.07231e-37	1.61714e-36	None	12.0718	8.53085	1.41507	chr3	126707437	126756235	+	ENSG00000114554.7	8.10005	8.59148	8.90102	12.0821	11.4695	12.6636
MTA2	-0.464829	4.2416e-37	1.68326e-36	None	25.2257	36.9481	0.682734	chr11	62360686	62369312	-	ENSG00000149480.2	35.9989	37.5754	37.27	25.6765	25.1301	24.8705
IGFBP2	0.85282	4.85012e-37	1.92349e-36	None	14.0072	8.27756	1.69219	chr2	217497551	217529159	+	ENSG00000115457.5	8.85192	8.18789	7.79287	14.0649	14.5391	13.4175
STK17B	0.417366	5.48331e-37	2.17318e-36	None	34.0997	26.9193	1.26674	chr2	196998290	197041227	-	ENSG00000081320.6	27.2746	26.3437	27.1396	34.0646	34.9398	33.2946
NDFIP2	0.457916	6.25417e-37	2.47706e-36	None	27.6263	23.3242	1.18445	chr13	80055287	80130210	+	ENSG00000102471.9	24.2416	23.1751	22.5558	28.1013	28.0978	26.6797
SGSM3	0.797208	6.26648e-37	2.48031e-36	None	10.2004	6.43704	1.58465	chr22	40766595	40806293	+	ENSG00000100359.16	5.5571	7.06375	6.69027	10.0112	9.08019	11.5099
ENDOV	1.17882	6.80739e-37	2.69264e-36	Up	17.1657	8.7473	1.9624	chr17	78388965	78411886	+	ENSG00000173818.12	7.54578	9.71467	8.98146	18.0199	15.7601	17.7172
PTPRA	0.510113	7.19361e-37	2.84355e-36	None	25.0949	18.8962	1.32804	chr20	2844830	3019722	+	ENSG00000132670.16	17.065	20.1108	19.5128	26.2637	25.5154	23.5055
LARP4	-0.486967	7.45156e-37	2.94359e-36	None	26.2629	44.321	0.59256	chr12	50786166	50873787	+	ENSG00000161813.16	47.2303	39.467	46.2658	24.4413	28.6745	25.6728
HIST1H3D	-0.430007	7.47119e-37	2.94941e-36	None	205.096	300.662	0.682147	chr6	26197068	26199521	-	ENSG00000197409.6	301.286	307.163	293.537	200.337	207.608	207.342
PHF5A	-0.867548	7.67135e-37	3.02645e-36	None	12.8085	24.7758	0.516977	chr22	41855721	41864729	-	ENSG00000100410.3	24.1503	26.6948	23.4822	13.686	12.7153	12.0242
EIF1AX	-0.754111	7.73335e-37	3.04892e-36	None	8.99997	16.3842	0.549306	chrX	20142636	20159962	-	ENSG00000173674.6	17.5428	15.6548	15.9552	9.59999	9.56005	7.83986
DHX30	-0.577105	8.36115e-37	3.29428e-36	None	13.7045	21.1249	0.648739	chr3	47844399	47891685	+	ENSG00000132153.10	21.3849	20.3145	21.6752	13.7856	12.8008	14.5272
AHSA2	0.61144	8.57751e-37	3.37732e-36	None	14.1728	10.1856	1.39146	chr2	61404553	61418338	+	ENSG00000173209.18	9.94219	9.98879	10.6257	14.1533	14.5562	13.8088
KLHL36	0.507315	8.68652e-37	3.41802e-36	None	18.7777	15.2328	1.23272	chr16	84682131	84701292	+	ENSG00000135686.8	14.5272	14.7298	16.4414	18.4286	18.7247	19.1798
SLBP	-0.660586	9.10086e-37	3.57873e-36	None	14.2625	25.6633	0.555756	chr4	1694527	1714282	-	ENSG00000163950.8	24.5885	25.6198	26.7815	15.0492	14.9396	12.7988
HIST2H2AA3	-0.447447	9.98877e-37	3.92532e-36	None	73.6615	108.531	0.678716	chr1	149813505	149814478	-	ENSG00000183558.5	109.06	109.161	107.371	75.3901	74.6788	70.9154
XRCC5	-0.456944	1.0647e-36	4.18127e-36	None	58.0968	85.5379	0.679193	chr2	216972187	217071026	+	ENSG00000079246.11	87.8138	85.2358	83.5642	58.9018	61.3869	54.0017
THBS1	0.355107	1.12371e-36	4.41014e-36	None	158.365	133.331	1.18777	chr15	39873280	39891667	+	ENSG00000137801.9	134.869	131.307	133.815	158.654	160.37	156.073
ERLIN2	0.490507	1.19747e-36	4.69657e-36	None	14.2908	10.8131	1.32161	chr8	37594117	37616619	+	ENSG00000147475.10	10.8008	11.0058	10.6327	14.9642	13.6944	14.2137
SOS1	0.486336	1.23239e-36	4.83039e-36	None	16.1574	12.122	1.3329	chr2	39208537	39351486	-	ENSG00000115904.8	12.5358	11.9491	11.8811	15.854	16.6736	15.9446
SRPX2	0.699408	1.27932e-36	5.01109e-36	None	17.5468	11.8775	1.47731	chrX	99899215	99926296	+	ENSG00000102359.5	11.2962	12.378	11.9584	18.7181	17.6481	16.2742
EPS8L2	0.485753	1.31198e-36	5.13569e-36	None	56.2365	37.9531	1.48174	chr11	694438	727727	+	ENSG00000177106.10	35.1355	37.4148	41.309	54.9176	56.9532	56.8387
MKNK1	0.628216	1.34333e-36	5.25499e-36	None	32.1976	21.8161	1.47586	chr1	47023090	47082515	-	ENSG00000079277.15	20.3957	22.5007	22.5518	30.871	34.2392	31.4827
EIF2B1	-0.503802	1.46685e-36	5.73449e-36	None	22.3675	33.6418	0.664874	chr12	124104953	124118313	-	ENSG00000111361.8	34.4694	33.2163	33.2396	22.576	23.0105	21.5161
HNRNPF	-0.431249	1.48905e-36	5.81749e-36	None	75.082	108.179	0.694052	chr10	43881065	43904614	-	ENSG00000169813.12	107.525	110.239	106.773	79.1536	76.0704	70.0219
PLAUR	-0.766807	1.54521e-36	6.03299e-36	None	12.8063	24.2667	0.527732	chr19	44150247	44174699	-	ENSG00000011422.7	22.4952	26.4704	23.8346	12.2677	12.9369	13.2144
PRKDC	-0.344128	1.76305e-36	6.8791e-36	None	106.919	147.565	0.724552	chr8	48685669	48872743	-	ENSG00000253729.3	152.821	143.807	146.069	107.439	108.613	104.705
EPB41L5	0.749685	1.89286e-36	7.3808e-36	None	10.1685	6.5777	1.5459	chr2	120770581	120936695	+	ENSG00000115109.9	6.61125	6.13664	6.9852	10.3231	10.6359	9.54645
HSPBP1	-0.668302	1.91181e-36	7.4499e-36	None	15.4942	26.6674	0.581015	chr19	55773599	55791749	-	ENSG00000133265.6	25.7112	26.5481	27.743	15.1664	16.3215	14.9947
USP36	-0.594532	1.97852e-36	7.70486e-36	None	17.1691	28.2376	0.608022	chr17	76783463	76837523	-	ENSG00000055483.15	29.1682	25.9503	29.5944	18.8936	15.4384	17.1754
MED27	-0.6386	2.16619e-36	8.43027e-36	None	16.5035	27.698	0.595836	chr9	134735494	134955295	-	ENSG00000160563.9	28.0451	27.7793	27.2697	17.0451	17.0609	15.4044
TBC1D23	0.579411	2.209e-36	8.59134e-36	None	15.089	10.1921	1.48046	chr3	99979844	100044095	+	ENSG00000036054.8	10.4546	9.70863	10.413	15.0406	16.119	14.1073
GJC1	-0.531803	2.33511e-36	9.07598e-36	None	9.76348	15.2757	0.639152	chr17	42875816	42908184	-	ENSG00000182963.5	15.4984	15.2601	15.0685	9.83382	9.84643	9.61018
TMEM127	0.529955	2.36519e-36	9.18698e-36	None	20.1759	15.3982	1.31027	chr2	96914254	96931732	-	ENSG00000135956.4	14.0407	16.0926	16.0614	21.0042	20.4869	19.0365
EIF2AK3	0.549795	2.80145e-36	1.08745e-35	None	12.6663	9.09206	1.39311	chr2	88856259	88927094	-	ENSG00000172071.7	9.20306	9.21239	8.86074	12.9535	12.9884	12.0569
HELZ	0.402236	2.84484e-36	1.10359e-35	None	18.799	13.9697	1.3457	chr17	65066554	65242105	-	ENSG00000198265.7	14.7609	13.5293	13.6188	20.3262	17.4637	18.6071
FBXO32	0.567263	3.24527e-36	1.25812e-35	None	12.9365	9.59601	1.34812	chr8	124510129	124553446	-	ENSG00000156804.3	9.11261	9.27692	10.3985	13.0096	12.3346	13.4654
MON2	0.476333	3.35098e-36	1.29826e-35	None	18.1218	13.1046	1.38286	chr12	62860597	62991363	+	ENSG00000061987.10	12.8465	12.9271	13.5403	18.4547	17.2226	18.6881
EGLN1	-0.472412	3.45292e-36	1.3369e-35	None	10.9916	15.8857	0.691918	chr1	231499497	231560790	-	ENSG00000135766.8	16.1413	16.0625	15.4532	11.0221	11.2711	10.6815
STRN	0.416168	4.07371e-36	1.57624e-35	None	19.6138	15.8294	1.23908	chr2	37070783	37193615	-	ENSG00000115808.7	15.9743	15.4976	16.0161	19.6796	20.0605	19.1014
MTOR	-0.406349	4.1782e-36	1.61564e-35	None	21.3522	30.5166	0.699692	chr1	11166592	11322564	-	ENSG00000198793.8	29.9	30.4866	31.1632	21.1492	21.6213	21.2862
MSH2	-0.486391	4.24148e-36	1.63906e-35	None	29.9696	44.642	0.671331	chr2	47630108	47789450	+	ENSG00000095002.8	44.9696	43.7053	45.251	30.4711	31.088	28.3496
PDCD5	-0.774098	4.25173e-36	1.64197e-35	None	19.3041	40.3771	0.478096	chr19	33071974	33078358	+	ENSG00000105185.7	40.1997	41.1427	39.789	18.3705	21.6373	17.9046
TCTN1	0.696765	5.64183e-36	2.17742e-35	None	15.9556	10.3994	1.53428	chr12	111051832	111087235	+	ENSG00000204852.11	10.3711	10.7294	10.0975	16.9106	15.5979	15.3582
ADD1	0.443499	5.6591e-36	2.18269e-35	None	30.3203	23.3845	1.2966	chr4	2845584	2931803	+	ENSG00000087274.12	23.4015	23.3903	23.3618	30.193	30.4194	30.3486
AP1G2	0.588578	5.86147e-36	2.2593e-35	None	26.7928	18.9022	1.41744	chr14	24028774	24037279	-	ENSG00000213983.7	17.1497	19.0548	20.5021	27.5741	25.5323	27.2719
CPT1A	0.562591	6.481e-36	2.49651e-35	None	12.0533	9.09373	1.32546	chr11	68522088	68611878	-	ENSG00000110090.8	8.77533	9.86743	8.63842	12.3436	11.3214	12.495
PSAT1	-0.637859	6.92113e-36	2.66435e-35	None	13.3681	21.984	0.608082	chr9	80912059	80945009	+	ENSG00000135069.9	22.3275	21.0741	22.5505	13.9986	13.2947	12.811
OPN3	0.562851	7.28087e-36	2.80105e-35	None	26.5519	19.6052	1.35433	chr1	241753404	241840678	-	ENSG00000054277.8	19.6942	18.8736	20.2478	27.5361	27.159	24.9607
GALNT3	0.510452	8.31299e-36	3.19608e-35	None	20.0285	15.2362	1.31453	chr2	166604101	166651192	-	ENSG00000115339.9	15.2674	15.4991	14.9422	20.6521	19.8483	19.5851
HECTD4	0.537131	9.9544e-36	3.82472e-35	None	13.1856	9.62177	1.37039	chr12	112597992	112819896	-	ENSG00000173064.6	9.30029	9.65785	9.90716	12.6796	12.7009	14.1764
TXNL4A	-0.796321	1.02212e-35	3.92474e-35	None	14.8113	26.2924	0.563331	chr18	77732867	77793949	-	ENSG00000141759.10	27.3553	26.5733	24.9485	15.5423	14.8601	14.0315
TTC27	-0.586372	1.0243e-35	3.93061e-35	None	10.8158	17.4849	0.618577	chr2	32853099	33046118	+	ENSG00000018699.7	17.6077	17.0488	17.7981	11.3057	10.8131	10.3284
ISOC1	-0.802366	1.088e-35	4.17238e-35	None	6.80324	12.6977	0.535785	chr5	128430444	128449721	+	ENSG00000066583.7	13.0344	12.3971	12.6617	7.22075	6.8715	6.31748
PIK3R2	0.657482	1.13976e-35	4.3681e-35	None	16.8172	11.516	1.46033	chr19	18263928	18281350	+	ENSG00000105647.10	10.6204	11.6018	12.3259	17.0295	16.663	16.7591
MAPKAP1	-0.417211	1.30511e-35	4.99866e-35	None	39.9205	62.8094	0.635582	chr9	128199672	128469513	-	ENSG00000119487.12	53.2453	65.2272	69.9558	38.5002	39.266	41.9953
ASNSD1	-0.601082	1.40894e-35	5.39292e-35	None	17.7954	28.7391	0.619206	chr2	190526111	190535557	+	ENSG00000138381.5	30.2249	28.0517	27.9407	18.9486	18.0963	16.3414
MED25	0.603966	1.43594e-35	5.49278e-35	None	21.6999	15.2456	1.42336	chr19	50321539	50342073	+	ENSG00000104973.10	14.3927	15.2569	16.0871	20.991	22.6817	21.4269
PPID	-0.728437	1.50238e-35	5.74329e-35	None	9.70808	17.1331	0.566627	chr4	159630286	159644548	-	ENSG00000171497.4	17.7421	16.4411	17.2161	9.88674	10.0093	9.22821
LAMC2	-0.356572	1.6114e-35	6.15613e-35	None	50.6676	70.7206	0.716448	chr1	183155373	183214035	+	ENSG00000058085.10	71.0541	70.6351	70.4726	51.8009	51.4791	48.7228
TVP23C	0.896022	1.63495e-35	6.24215e-35	None	37.2855	19.5171	1.9104	chr17	15341205	15466909	-	ENSG00000175106.12	21.9778	15.6085	20.9651	33.2549	41.0529	37.5486
KIDINS220	0.499252	1.6822e-35	6.41849e-35	None	18.2604	12.8517	1.42086	chr2	8865408	8977760	-	ENSG00000134313.10	12.9186	12.972	12.6644	17.7708	17.5716	19.439
CAMK2D	0.557115	1.80813e-35	6.89463e-35	None	10.9128	8.30862	1.31343	chr4	114372188	114683083	-	ENSG00000145349.12	8.11238	9.10022	7.71327	10.6301	10.7289	11.3793
CLHC1	0.807417	1.81315e-35	6.9094e-35	None	17.1446	10.7234	1.59879	chr2	55401927	55459699	-	ENSG00000162994.11	9.54134	11.1853	11.4436	18.7569	16.5131	16.1637
AKR1A1	0.479458	1.95209e-35	7.43418e-35	None	53.0673	40.9747	1.29512	chr1	46016215	46035721	+	ENSG00000117448.9	42.4961	38.1528	42.2753	51.1911	53.4102	54.6007
PUM1	0.371851	1.97898e-35	7.53185e-35	None	52.4047	43.8507	1.19507	chr1	31404353	31538838	-	ENSG00000134644.11	42.7146	44.0134	44.8241	54.6677	50.0317	52.5148
CHMP4B	0.487368	1.99221e-35	7.57743e-35	None	52.6522	40.598	1.29692	chr20	32399110	32442172	+	ENSG00000101421.3	40.1403	41.3336	40.3201	51.8108	53.3998	52.7459
KDM3B	0.37976	2.08228e-35	7.91501e-35	None	42.1612	34.7643	1.21277	chr5	137688285	137772717	+	ENSG00000120733.9	34.7516	34.2157	35.3257	43.4047	41.9709	41.108
STON2	0.656406	2.23659e-35	8.49622e-35	None	15.4289	10.334	1.49301	chr14	81727000	81902809	-	ENSG00000140022.5	10.1751	10.1176	10.7094	16.5068	13.8646	15.9151
PCGF3	0.569417	2.26852e-35	8.61212e-35	None	12.3555	8.15402	1.51526	chr4	699537	764428	+	ENSG00000185619.13	7.91277	8.60291	7.94638	11.7729	12.0315	13.2622
RABGGTB	-0.443044	2.30001e-35	8.72619e-35	None	68.9378	101.17	0.681406	chr1	76251879	76260764	+	ENSG00000137955.11	106.816	100.758	95.9363	69.7634	68.5726	68.4773
NGRN	-0.564327	2.50885e-35	9.51252e-35	None	16.0664	25.9879	0.618228	chr15	90808891	90816463	+	ENSG00000182768.7	26.0985	26.5525	25.3127	15.6007	16.5827	16.0159
USP10	-0.440728	2.67392e-35	1.0132e-34	None	29.9211	48.491	0.617043	chr16	84733584	84813528	+	ENSG00000103194.11	53.7493	49.4572	42.2666	29.9611	30.6146	29.1875
MRPS23	-0.840674	2.79832e-35	1.05968e-34	None	12.4423	24.0005	0.51842	chr17	55916842	55927417	-	ENSG00000181610.8	23.4764	25.4058	23.1193	12.1786	12.7645	12.3839
EEF1E1	-0.921197	2.89516e-35	1.09566e-34	None	10.5802	21.3151	0.496372	chr6	8073593	8102811	-	ENSG00000124802.7	23.5351	20.4161	19.994	10.7537	10.7496	10.2373
TCEB3	-0.579698	3.57654e-35	1.35268e-34	None	7.61669	13.7299	0.554752	chr1	24069645	24088549	+	ENSG00000011007.8	14.1493	13.8809	13.1595	7.37835	8.55848	6.91323
IGF2BP3	0.459468	3.61857e-35	1.36772e-34	None	43.6691	34.0503	1.28249	chr7	23349828	23510086	-	ENSG00000136231.9	34.7942	33.9656	33.3912	42.2531	44.5952	44.159
PRSS16	0.971679	3.76404e-35	1.42181e-34	None	11.4982	6.7569	1.7017	chr6	27215480	27224403	+	ENSG00000112812.11	6.428	6.46082	7.38187	12.62	13.0709	8.80377
ERCC6L	-0.762216	4.25642e-35	1.6068e-34	None	6.10963	11.1751	0.546716	chrX	71424510	71458897	-	ENSG00000186871.5	11.7927	10.8827	10.8501	6.11553	6.80239	5.41097
RQCD1	-0.423927	4.62234e-35	1.74384e-34	None	30.1451	43.5996	0.691407	chr2	219433303	219461803	+	ENSG00000144580.9	43.4444	45.5916	41.7628	29.6102	32.4685	28.3565
MED1	-0.438111	4.72584e-35	1.78178e-34	None	19.0457	27.3737	0.695765	chr17	37560538	37607539	-	ENSG00000125686.7	27.6813	27.6245	26.8153	19.5439	19.5596	18.0335
NBPF1	0.517248	4.88288e-35	1.83984e-34	None	24.5097	18.6776	1.31225	chr1	16888814	16940057	-	ENSG00000219481.6	18.3639	18.6816	18.9872	23.6232	25.7219	24.1839
ARHGAP12	0.495304	6.07537e-35	2.28773e-34	None	21.6723	18.7535	1.15564	chr10	32094365	32217742	-	ENSG00000165322.13	19.5579	18.1885	18.5141	21.5789	20.9788	22.4591
PLOD2	0.729975	6.18204e-35	2.32645e-34	None	10.4006	6.28021	1.65609	chr3	145787227	145881440	-	ENSG00000152952.7	6.81576	5.84591	6.17896	10.0692	11.2771	9.85541
RANGAP1	-0.533849	6.3047e-35	2.37113e-34	None	28.8696	45.6248	0.63276	chr22	41641615	41682255	-	ENSG00000100401.15	42.7165	46.9434	47.2146	29.631	28.5188	28.4589
C2CD5	0.528522	6.89948e-35	2.59321e-34	None	16.4388	11.9476	1.37592	chr12	22601517	22697480	-	ENSG00000111731.8	12.2535	11.8455	11.7438	16.033	16.509	16.7746
KIAA1551	0.496501	7.81362e-35	2.93497e-34	None	16.1798	13.0346	1.2413	chr12	32112304	32146039	+	ENSG00000174718.7	13.2783	12.7558	13.0696	15.9528	16.5058	16.0806
IDH1	0.503323	7.83406e-35	2.94082e-34	None	35.0206	26.168	1.3383	chr2	209100951	209130798	-	ENSG00000138413.9	25.2009	26.0721	27.2309	36.8608	34.2456	33.9555
ASPH	-0.440249	8.08906e-35	3.03277e-34	None	53.96	76.1664	0.708449	chr8	62413116	62627155	-	ENSG00000198363.11	79.5869	74.3978	74.5146	54.0015	53.1909	54.6877
FAM129B	0.394581	8.08664e-35	3.03277e-34	None	108.2	88.9381	1.21657	chr9	130267618	130341268	-	ENSG00000136830.7	85.8233	89.0902	91.9008	109.881	108.68	106.039
LYN	-0.522644	8.42251e-35	3.15583e-34	None	15.6502	24.162	0.647719	chr8	56792372	56923940	+	ENSG00000254087.3	24.8344	24.0231	23.6284	15.674	16.0412	15.2352
UCHL5	-0.702483	9.03176e-35	3.38201e-34	None	8.36936	14.9627	0.559349	chr1	192981380	193029237	-	ENSG00000116750.9	15.5701	14.5551	14.7628	8.35721	8.48188	8.26899
DLG5	0.469483	9.17169e-35	3.43228e-34	None	25.9883	20.132	1.29089	chr10	79550549	79686378	-	ENSG00000151208.12	19.6875	20.2036	20.5049	25.2546	25.883	26.8272
CASC4	0.513823	9.6433e-35	3.60654e-34	None	21.7831	16.3168	1.33501	chr15	44580927	44707956	+	ENSG00000166734.14	17.1698	15.9428	15.8378	21.4211	22.9553	20.9729
FLAD1	-0.62331	9.73488e-35	3.63853e-34	None	12.3563	20.1576	0.612986	chr1	154955814	154965587	+	ENSG00000160688.14	20.1249	20.4793	19.8686	12.4106	13.0223	11.636
TMEM38B	-0.677107	9.77159e-35	3.64999e-34	None	7.91625	13.2712	0.5965	chr9	108456825	108538893	+	ENSG00000095209.7	13.9292	13.1838	12.7005	8.6912	7.64218	7.41537
AMOTL1	0.392836	1.13202e-34	4.22585e-34	None	39.9804	31.137	1.28401	chr11	94439597	94609918	+	ENSG00000166025.13	29.4511	31.9775	31.9825	38.4742	40.2639	41.2031
C9orf16	0.684979	1.23028e-34	4.58981e-34	None	35.197	23.4031	1.50395	chr9	130922539	130926207	+	ENSG00000171159.4	23.7741	23.7362	22.6989	36.584	34.0869	34.9199
BLMH	-0.643424	1.40229e-34	5.22828e-34	None	9.57614	15.7191	0.609204	chr17	28575218	28619074	-	ENSG00000108578.10	15.99	15.6697	15.4977	9.6968	9.61893	9.41269
CDH3	0.422587	1.47675e-34	5.5025e-34	None	67.4061	55.4663	1.21526	chr16	68670092	68756519	+	ENSG00000062038.9	50.9217	61.7404	53.7369	65.3355	66.8904	69.9924
CORO1C	-0.439835	1.52581e-34	5.68181e-34	None	27.3973	38.6321	0.709186	chr12	109038885	109125372	-	ENSG00000110880.6	39.7767	38.3398	37.7797	27.0521	27.6111	27.5286
FLRT2	0.5144	1.55568e-34	5.78948e-34	None	13.8324	8.77087	1.57708	chr14	85996488	86095034	+	ENSG00000185070.6	9.10375	8.60333	8.60551	12.8759	13.9228	14.6984
SPSB3	1.01379	1.59868e-34	5.94582e-34	Up	10.0805	5.51288	1.82853	chr16	1826713	1843701	-	ENSG00000162032.11	4.72901	6.37324	5.43638	10.3989	10.0134	9.82911
NDUFB9	-0.69107	1.71005e-34	6.35613e-34	None	28.9023	51.6052	0.560064	chr8	125551344	125580751	+	ENSG00000147684.3	48.4943	52.4185	53.903	30.2252	29.243	27.2386
APP	0.372111	1.72637e-34	6.41284e-34	None	96.1168	80.7042	1.19098	chr21	27252861	27543446	-	ENSG00000142192.16	81.698	80.1178	80.297	98.9295	99.1164	90.3046
PRKRIR	-0.619417	1.75922e-34	6.53084e-34	None	11.7909	19.7735	0.596297	chr11	76061000	76092015	-	ENSG00000137492.3	21.2481	18.9428	19.1296	11.794	12.6516	10.9271
CDKN2B	0.535112	1.86486e-34	6.91878e-34	None	15.1448	11.2422	1.34713	chr9	22002902	22009362	-	ENSG00000147883.9	11.4241	10.8741	11.4285	14.9233	15.6529	14.8581
DNAJC16	0.499468	2.23972e-34	8.30443e-34	None	12.0826	9.02412	1.33892	chr1	15853308	15918874	+	ENSG00000116138.8	8.89031	9.02629	9.15577	12.1765	12.1439	11.9275
TPX2	-0.397982	2.6671e-34	9.883e-34	None	94.269	134.124	0.70285	chr20	30327074	30389608	+	ENSG00000088325.11	133.93	136.001	132.441	94.5099	99.7726	88.5244
ZNF417	0.691967	2.7435e-34	1.01599e-33	None	11.2719	7.04877	1.59913	chr19	58411664	58427978	-	ENSG00000173480.6	6.85358	7.03731	7.25542	10.4274	11.1226	12.2658
ERI1	-0.565572	3.27304e-34	1.21134e-33	None	10.879	15.098	0.720563	chr8	8859657	8974256	+	ENSG00000104626.10	15.797	15.1155	14.3815	10.215	12.66	9.76205
TLE4	0.718414	3.88237e-34	1.43598e-33	None	11.8985	7.79103	1.5272	chr9	82186688	82341658	+	ENSG00000106829.14	7.3102	8.46068	7.60222	12.8801	11.4695	11.3459
RAD54B	-0.557855	3.93267e-34	1.45369e-33	None	14.5497	22.5109	0.646339	chr8	95384188	95487337	-	ENSG00000197275.8	22.8395	22.0984	22.5948	14.4376	14.1575	15.0539
DNAJC2	-0.820517	3.94426e-34	1.45708e-33	None	9.0217	16.5812	0.544092	chr7	102952921	102985320	-	ENSG00000105821.10	16.8616	16.0991	16.7828	9.40935	9.43314	8.2226
EFHD2	-0.508591	4.13243e-34	1.52567e-33	None	19.8383	30.4627	0.651233	chr1	15736391	15756839	+	ENSG00000142634.8	29.5297	31.3637	30.4948	20.3674	19.7075	19.4401
RFC4	-0.65722	4.1517e-34	1.53094e-33	None	31.1609	54.4804	0.571965	chr3	186507669	186524847	-	ENSG00000163918.6	56.4474	52.2203	54.7737	32.9928	32.4194	28.0706
STK38	0.448275	4.15178e-34	1.53094e-33	None	28.7173	22.7352	1.26312	chr6	36461669	36515247	-	ENSG00000112079.8	23.0338	22.3058	22.8659	28.907	29.9736	27.2713
CTNNA1	0.351788	4.26935e-34	1.57333e-33	None	110.218	95.429	1.15497	chr5	137946656	138270723	+	ENSG00000044115.16	94.1691	95.7191	96.3987	111.234	112.177	107.243
PAPD4	0.59322	4.29166e-34	1.58059e-33	None	16.3972	11.2046	1.46343	chr5	78907943	78982471	+	ENSG00000164329.9	11.1921	10.6245	11.7973	16.1748	16.5027	16.514
CLK1	0.58141	4.32319e-34	1.59123e-33	None	19.6815	14.3279	1.37365	chr2	201717732	201729422	-	ENSG00000013441.11	13.7873	12.9413	16.2551	17.9922	20.1138	20.9384
MAT2B	0.473579	4.54727e-34	1.67269e-33	None	37.1359	28.8862	1.28559	chr5	162930120	162946342	+	ENSG00000038274.12	29.5275	28.2587	28.8725	38.5499	37.0098	35.848
GLRX3	-0.561389	4.93703e-34	1.81495e-33	None	33.7536	53.3991	0.632101	chr10	131934663	131982785	+	ENSG00000108010.7	55.4355	51.8363	52.9256	32.6484	36.1573	32.4553
BIRC5	-0.454763	4.97569e-34	1.82805e-33	None	45.863	67.4578	0.679877	chr17	76210267	76221717	+	ENSG00000089685.10	65.901	68.5982	67.8741	46.6214	48.2469	42.7206
MRPL35	-0.658892	5.43075e-34	1.99403e-33	None	12.7605	21.7992	0.585364	chr2	86426478	86440917	+	ENSG00000132313.10	24.8148	23.3003	17.2825	14.0153	14.0923	10.1738
ANKRD50	0.408865	5.7993e-34	2.12805e-33	None	26.6453	21.6928	1.2283	chr4	125585207	125633887	-	ENSG00000151458.7	22.1944	21.3536	21.5304	26.4633	26.9136	26.5589
COG5	0.536376	6.11708e-34	2.2433e-33	None	11.8538	8.84077	1.34081	chr7	106842000	107204959	-	ENSG00000164597.9	8.77998	8.72715	9.01517	11.9524	11.926	11.6831
ATP5G1	-0.676066	6.19677e-34	2.27115e-33	None	47.0366	79.5116	0.59157	chr17	46970127	46973233	+	ENSG00000159199.9	74.6003	84.6849	79.2495	47.5085	48.9242	44.6771
AFF4	0.402991	6.63669e-34	2.4309e-33	None	24.196	19.5156	1.23983	chr5	132211071	132299326	-	ENSG00000072364.8	20.1315	18.9083	19.507	24.3493	24.5495	23.6893
EMG1	-1.02419	6.8085e-34	2.49233e-33	Down	9.48399	23.6441	0.401114	chr12	7072408	7105520	+	ENSG00000126749.10	19.6145	24.8713	26.4467	9.34844	9.76273	9.3408
UFL1	0.576496	7.37207e-34	2.69699e-33	None	11.1532	8.06324	1.38321	chr6	96969471	97003152	+	ENSG00000014123.9	8.402	7.92749	7.86022	11.226	11.501	10.7325
MRPS26	-0.752369	8.26299e-34	3.02109e-33	None	12.2317	22.2681	0.549291	chr20	3026591	3028900	+	ENSG00000125901.5	22.0523	22.3942	22.358	13.0645	11.8466	11.784
FIGNL1	-0.589458	8.55437e-34	3.12574e-33	None	8.80556	14.3825	0.612242	chr7	50511831	50518088	-	ENSG00000132436.7	14.8267	14.4638	13.8571	9.10306	8.96256	8.35107
ARHGAP1	0.540338	8.61774e-34	3.14699e-33	None	35.6427	26.557	1.34212	chr11	46698630	46722165	-	ENSG00000175220.7	25.12	27.6491	26.9019	34.8016	36.44	35.6865
RAPGEF1	0.510388	8.70913e-34	3.17844e-33	None	20.5681	15.6202	1.31677	chr9	134452157	134615461	-	ENSG00000107263.14	14.4976	16.594	15.7688	20.4581	20.9455	20.3008
AATF	-0.544838	9.5988e-34	3.50101e-33	None	15.8198	24.3061	0.650854	chr17	35306175	35414171	+	ENSG00000108270.6	23.571	24.8072	24.5402	15.5006	16.1048	15.8538
UBE3C	-0.424281	1.08009e-33	3.93708e-33	None	17.5941	24.4978	0.718194	chr7	156931607	157062066	+	ENSG00000009335.13	24.6526	24.0082	24.8324	17.7218	17.8967	17.1639
TNIP1	0.494685	1.16612e-33	4.24812e-33	None	31.3788	24.2086	1.29618	chr5	150409506	150473138	-	ENSG00000145901.10	22.5406	24.8553	25.2299	31.0325	31.3893	31.7147
IL13RA1	0.555296	1.28297e-33	4.67098e-33	None	16.7084	12.2987	1.35855	chrX	117861535	117928502	+	ENSG00000131724.6	12.8273	12.2143	11.8544	16.5069	17.3679	16.2503
INPP5A	-0.471376	1.32203e-33	4.81028e-33	None	18.7869	28.2374	0.665318	chr10	134351324	134596979	+	ENSG00000068383.14	29.0375	27.9029	27.7719	19.0211	19.3665	17.973
NKRF	-0.627079	1.32386e-33	4.81404e-33	None	7.34349	12.323	0.595919	chrX	118722300	118739858	-	ENSG00000186416.8	12.8194	12.1061	12.0434	7.41098	7.31447	7.30503
SP1	0.362707	1.39486e-33	5.06917e-33	None	40.571	30.1042	1.34768	chr12	53773960	53810230	+	ENSG00000185591.5	29.7989	29.9768	30.537	39.4787	41.9494	40.2849
CERS2	-0.3923	1.46772e-33	5.33075e-33	None	47.1791	68.1218	0.692569	chr1	150933059	150947479	-	ENSG00000143418.15	65.8842	70.1608	68.3204	48.3821	46.3321	46.823
GATAD2A	-0.452269	1.48977e-33	5.40756e-33	None	16.358	23.307	0.701848	chr19	19496635	19619740	+	ENSG00000167491.13	23.4876	23.7367	22.6967	15.5496	16.5003	17.024
GPR125	0.589824	1.60076e-33	5.80694e-33	None	17.2692	12.2376	1.41116	chr4	22346694	22517677	-	ENSG00000152990.9	12.1886	11.9624	12.5618	17.0974	16.6513	18.059
TFAP2C	0.596088	1.78143e-33	6.45847e-33	None	17.1321	12.4754	1.37327	chr20	55204358	55214339	+	ENSG00000087510.5	12.26	13.2131	11.9531	16.4739	17.4511	17.4714
SRSF3	-0.478014	2.23745e-33	8.1069e-33	None	60.8923	82.0506	0.742131	chr6	36562145	36573377	+	ENSG00000112081.12	86.2065	79.4469	80.4984	60.8036	63.4121	58.4612
CST3	0.56281	2.3253e-33	8.42017e-33	None	51.8218	39.9779	1.29626	chr20	23608534	23619110	-	ENSG00000101439.4	38.496	40.5081	40.9296	53.8162	52.5269	49.1224
TRAPPC9	0.729841	2.40416e-33	8.70048e-33	None	12.9052	8.56109	1.50743	chr8	140742586	141468678	-	ENSG00000167632.10	8.40544	8.48518	8.79265	12.5866	11.8437	14.2854
TWISTNB	-0.635534	2.58446e-33	9.34737e-33	None	7.75312	13.0451	0.594331	chr7	19735085	19748710	-	ENSG00000105849.5	13.8893	12.6552	12.5909	8.09361	7.81824	7.34751
YBX3	0.353778	2.59593e-33	9.38324e-33	None	162.103	142.273	1.13938	chr12	10851683	10875911	-	ENSG00000060138.8	137.169	147.537	142.112	159.566	163.249	163.494
PAQR7	0.55065	2.73481e-33	9.87933e-33	None	17.825	13.1476	1.35576	chr1	26187701	26197744	-	ENSG00000182749.5	12.4627	13.5885	13.3915	17.8289	17.9363	17.7097
PSMC1	-0.584367	2.75049e-33	9.93003e-33	None	22.2082	36.0426	0.616166	chr14	90722839	90738968	+	ENSG00000100764.9	36.3819	36.9538	34.792	22.3726	23.6882	20.5638
TMEM67	0.686962	2.80077e-33	1.01055e-32	None	10.8125	6.92045	1.56239	chr8	94767072	94831462	+	ENSG00000164953.11	7.05992	6.93519	6.76623	11.243	10.7365	10.4579
HIST1H2BK	-0.37205	2.85405e-33	1.02916e-32	None	244.807	343.333	0.713031	chr6	27106073	27114619	-	ENSG00000197903.6	340.456	350.074	339.467	243.252	250.256	240.912
BLM	-0.594657	2.98841e-33	1.07697e-32	None	7.32228	11.9415	0.613182	chr15	91260558	91358859	+	ENSG00000197299.6	11.6117	12.4749	11.7378	7.10092	7.87811	6.98782
TMSB4X	0.580284	3.03881e-33	1.09448e-32	None	600.428	432.914	1.38695	chrX	12993227	12995346	+	ENSG00000205542.6	430.725	453.826	414.19	645.066	636.925	519.294
TRMT1	-0.757745	3.21023e-33	1.15553e-32	None	6.94496	12.5428	0.553699	chr19	13215716	13228381	-	ENSG00000104907.8	12.4104	12.9258	12.2923	7.35128	6.47776	7.00583
SSRP1	-0.336631	3.50224e-33	1.25989e-32	None	108.559	147.72	0.734892	chr11	57093459	57103351	-	ENSG00000149136.3	146.587	148.728	147.846	113.116	110.877	101.683
HIST1H2BG	-0.629164	3.6647e-33	1.31755e-32	None	123.865	207.147	0.597958	chr6	26216428	26216872	-	ENSG00000187990.4	193.28	224.485	203.677	122.261	123.256	126.08
TTC17	0.463939	3.83075e-33	1.37643e-32	None	40.7045	31.1554	1.3065	chr11	43380482	43516483	+	ENSG00000052841.10	30.9889	30.8691	31.608	40.2198	41.1456	40.748
KDM5A	0.434489	3.91943e-33	1.40745e-32	None	17.5045	13.3351	1.31266	chr12	389295	498620	-	ENSG00000073614.7	13.2137	13.2522	13.5394	17.0404	17.2836	18.1894
ANXA11	0.558108	4.10451e-33	1.47304e-32	None	27.8744	22.9663	1.21371	chr10	81910645	81965328	-	ENSG00000122359.13	24.0593	22.9337	21.9059	27.3906	29.392	26.8405
MRPL17	-0.702596	4.11672e-33	1.47654e-32	None	8.98699	15.834	0.567575	chr11	6702013	6704632	-	ENSG00000158042.8	16.4238	15.7073	15.371	8.98676	8.93885	9.03536
TIAM1	0.499126	4.13806e-33	1.48332e-32	None	14.2445	10.4205	1.36697	chr21	32490734	32932290	-	ENSG00000156299.8	9.7725	10.6873	10.8016	14.3193	14.0068	14.4074
IGF2BP2	0.451791	4.19344e-33	1.50228e-32	None	62.1246	49.3115	1.25984	chr3	185361527	185542844	-	ENSG00000073792.11	47.8752	50.0945	49.9648	61.4696	60.6641	64.2403
DCUN1D5	-0.975282	4.33216e-33	1.55105e-32	None	9.89166	21.6955	0.455931	chr11	102932805	102962944	-	ENSG00000137692.7	23.2343	20.4015	21.4507	10.5235	10.7536	8.39793
COA4	-0.718379	4.49775e-33	1.60938e-32	None	16.7717	30.3208	0.553142	chr11	73583712	73588033	-	ENSG00000181924.6	30.8458	30.0771	30.0393	16.6266	17.6259	16.0625
HIST1H3J	-0.732294	4.73963e-33	1.69493e-32	None	45.1708	81.159	0.556571	chr6	27858093	27860884	-	ENSG00000197153.3	76.1477	84.304	83.0254	42.42	46.3834	46.7089
ZNF121	-0.434813	4.91971e-33	1.75829e-32	None	34.197	50.0903	0.682707	chr19	9671029	9695209	-	ENSG00000197961.7	50.9547	49.6748	49.6413	34.6202	35.013	32.9577
SAE1	-0.468702	4.93472e-33	1.76261e-32	None	62.6384	94.8723	0.66024	chr19	47616531	47713886	+	ENSG00000142230.7	94.3016	94.258	96.0571	63.7856	67.4825	56.6472
SLC25A39	-0.552655	5.18563e-33	1.85114e-32	None	46.2091	77.0445	0.599772	chr17	42396993	42402238	-	ENSG00000013306.11	71.1128	77.0514	82.9694	45.3208	46.4653	46.8414
TM4SF1	0.507945	5.48569e-33	1.95709e-32	None	44.4917	33.6873	1.32073	chr3	149086809	149095652	-	ENSG00000169908.6	33.1661	35.3088	32.587	44.9718	46.789	41.7142
POGZ	0.404926	5.85081e-33	2.08612e-32	None	35.8122	25.9075	1.38231	chr1	151375200	151431941	-	ENSG00000143442.17	25.1123	25.8152	26.7951	35.8733	35.3037	36.2596
GCA	0.851451	6.06135e-33	2.15992e-32	None	13.67	8.37774	1.6317	chr2	163175350	163228105	+	ENSG00000115271.6	8.5112	7.33865	9.28336	14.4695	14.1638	12.3766
RAB13	0.654833	6.33001e-33	2.25432e-32	None	28.1549	19.2677	1.46125	chr1	153954127	153958834	-	ENSG00000143545.4	18.4471	20.3273	19.0287	29.4942	28.5353	26.4351
SPPL3	0.464691	6.66668e-33	2.37282e-32	None	22.5395	17.0255	1.32387	chr12	121200313	121342174	-	ENSG00000157837.11	16.4329	17.0357	17.6078	22.3529	22.6538	22.6119
PLAA	-0.644079	7.54334e-33	2.68326e-32	None	7.77717	12.4481	0.624768	chr9	26904081	26947461	-	ENSG00000137055.10	13.2984	11.5315	12.5144	7.41305	8.42807	7.4904
AGPAT3	0.580286	8.47908e-33	3.01434e-32	None	11.3661	8.34592	1.36188	chr21	45285067	45406417	+	ENSG00000160216.14	8.45176	8.69988	7.88612	10.0781	11.8149	12.2054
CSTF2	-0.699205	8.69947e-33	3.09087e-32	None	8.47674	14.8818	0.569604	chrX	100075384	100095921	+	ENSG00000101811.9	15.3976	14.9253	14.3226	8.32639	8.82713	8.27671
PPM1A	0.494557	9.00963e-33	3.19919e-32	None	15.0547	11.6387	1.2935	chr14	60712470	60765805	+	ENSG00000100614.13	11.6989	11.7015	11.5157	15.2541	15.1288	14.7812
PARP4	0.426527	9.22712e-33	3.27449e-32	None	20.7034	16.2225	1.27621	chr13	24995064	25086948	-	ENSG00000102699.5	16.3029	16.3566	16.008	21.3461	21.2597	19.5044
PRC1	-0.420569	9.54933e-33	3.38684e-32	None	30.1833	46.5502	0.648402	chr15	91509270	91538859	-	ENSG00000198901.9	50.0461	45.7227	43.882	29.2938	29.8289	31.4271
GFM1	-0.517072	1.03407e-32	3.66536e-32	None	13.1827	20.5047	0.642911	chr3	158362067	158410364	+	ENSG00000168827.10	21.032	20.6158	19.8663	13.3907	13.3214	12.836
NUS1	-0.540183	1.04712e-32	3.70945e-32	None	11.1003	17.446	0.636263	chr6	117996665	118031803	+	ENSG00000153989.7	18.2896	17.2765	16.772	11.6022	10.9705	10.7281
INTS3	0.487036	1.07199e-32	3.79531e-32	None	17.8064	14.0483	1.26752	chr1	153700543	153746555	+	ENSG00000143624.9	13.781	14.185	14.1788	17.5749	19.0891	16.7553
SPCS3	-0.452156	1.09487e-32	3.87404e-32	None	35.7915	52.5895	0.680583	chr4	177241115	177253396	+	ENSG00000129128.8	54.359	51.4985	51.9109	36.507	37.6614	33.2061
CFLAR	0.613618	1.11958e-32	3.95918e-32	None	12.1272	10.3051	1.17681	chr2	201980827	202041410	+	ENSG00000003402.15	9.33542	11.9782	9.60185	12.6922	11.6613	12.0281
GRPEL2	-0.531315	1.14021e-32	4.02977e-32	None	10.1748	16.0914	0.63231	chr5	148724993	148734146	+	ENSG00000164284.10	16.4663	15.576	16.2321	10.5942	9.97732	9.95278
SEPHS1	-0.466818	1.21235e-32	4.28221e-32	None	23.8878	33.0759	0.722211	chr10	13359424	13390297	-	ENSG00000086475.10	43.0309	28.505	27.6916	28.164	20.3432	23.156
PAM	0.414366	1.2846e-32	4.53475e-32	None	47.7998	39.4318	1.21221	chr5	102089685	102366809	+	ENSG00000145730.16	40.9774	38.8686	38.4495	49.4586	48.0202	45.9205
IKBKB	0.601605	1.34553e-32	4.74707e-32	None	16.3647	11.5231	1.42017	chr8	42128820	42189973	+	ENSG00000104365.9	11.2102	12.6022	10.7569	16.4644	16.3904	16.2394
TSPYL4	0.567513	1.42935e-32	5.03987e-32	None	10.1121	7.37561	1.37101	chr6	116571151	116575261	-	ENSG00000187189.9	7.57932	7.36187	7.18564	10.4375	10.1272	9.77148
FAM136A	-0.623227	1.46039e-32	5.14631e-32	None	17.8044	29.7217	0.599037	chr2	70523107	70529222	-	ENSG00000035141.3	31.3353	29.2052	28.6246	18.2526	18.8992	16.2613
TUBGCP4	-0.637174	1.60651e-32	5.65792e-32	None	6.30439	10.7943	0.584047	chr15	43661419	43699293	+	ENSG00000137822.8	10.6202	10.4214	11.3413	6.20363	6.09271	6.61683
CLPTM1L	-0.440585	1.68387e-32	5.92692e-32	None	32.7197	48.1375	0.679713	chr5	1317859	1345214	-	ENSG00000049656.9	47.5594	47.7088	49.1443	34.0714	32.9745	31.1132
HS1BP3	0.685023	1.80693e-32	6.35635e-32	None	11.5453	8.04688	1.43476	chr2	20760208	20850849	-	ENSG00000118960.8	7.61547	8.27911	8.24606	11.6028	11.7471	11.2861
SUN1	0.388166	1.8086e-32	6.35851e-32	None	56.6702	44.1985	1.28217	chr7	855528	936072	+	ENSG00000164828.13	42.5578	47.132	42.9058	53.5081	60.3663	56.1361
UMPS	-0.597363	1.95847e-32	6.88142e-32	None	11.125	18.6529	0.596423	chr3	124449213	124464040	+	ENSG00000114491.9	18.975	19.0801	17.9034	11.7602	11.2787	10.3361
CDCA4	-0.497941	2.29403e-32	8.0558e-32	None	15.7213	24.1387	0.65129	chr14	105475910	105487485	-	ENSG00000170779.10	23.7412	24.5526	24.1222	16.1536	15.784	15.2262
ETAA1	0.735912	2.35187e-32	8.2541e-32	None	12.548	7.93992	1.58037	chr2	67624451	67637677	+	ENSG00000143971.7	8.67704	7.72379	7.41893	12.6283	13.209	11.8066
AREG	-0.943901	2.54298e-32	8.91964e-32	None	6.57842	13.7047	0.480013	chr4	75310851	75320726	+	ENSG00000109321.6	14.1036	12.9039	14.1065	7.1392	6.28127	6.31478
NCAPG	-0.502507	2.65072e-32	9.29212e-32	None	12.9141	19.6571	0.65697	chr4	17812525	17846485	+	ENSG00000109805.5	20.148	19.4545	19.3688	12.9796	13.5535	12.2092
CKS2	-0.613436	2.68279e-32	9.39912e-32	None	70.4883	116.444	0.605341	chr9	91926113	91931618	+	ENSG00000123975.4	112.533	120.755	116.044	70.559	77.4119	63.4939
STRADA	0.677433	2.82282e-32	9.88395e-32	None	20.5773	13.513	1.52278	chr17	61780192	61819330	-	ENSG00000266173.1	12.9336	14.032	13.5734	19.897	19.2259	22.609
EIF4A3	-0.477341	2.90684e-32	1.01723e-31	None	51.2146	76.8357	0.666548	chr17	78109013	78120982	-	ENSG00000141543.5	74.0988	81.2516	75.1565	50.8655	52.5265	50.2519
PFN1	-0.438241	3.11346e-32	1.0889e-31	None	225.491	328.578	0.686264	chr17	4848947	4852356	-	ENSG00000108518.7	315.255	347.598	322.881	225.443	233.496	217.534
PAPOLA	-0.382298	3.82285e-32	1.33623e-31	None	70.5512	92.2388	0.764875	chr14	96967770	97033448	+	ENSG00000090060.13	94.9168	89.914	91.8854	70.9217	72.8787	67.8531
ERP27	0.866015	3.89424e-32	1.36039e-31	None	10.157	6.2909	1.61455	chr12	15066969	15092016	-	ENSG00000139055.2	6.61826	6.22485	6.0296	10.0275	10.5016	9.94179
SREBF2	0.477101	3.91958e-32	1.36846e-31	None	24.5167	18.7426	1.30807	chr22	42229109	42303312	+	ENSG00000198911.7	18.3011	19.2369	18.6899	24.1299	25.2422	24.1782
MYO10	-0.440472	4.02106e-32	1.40307e-31	None	9.5418	14.7248	0.64801	chr5	16665395	16936372	-	ENSG00000145555.10	14.0197	14.9857	15.169	9.15268	10.5558	8.91697
SRSF11	0.399589	4.02576e-32	1.4039e-31	None	93.6429	74.1842	1.2623	chr1	70671365	70718735	+	ENSG00000116754.9	75.6064	73.473	73.4731	97.4151	92.4005	91.113
PRKCZ	0.623723	4.35875e-32	1.51915e-31	None	15.4481	10.5828	1.45973	chr1	1981909	2116834	+	ENSG00000067606.11	10.8923	10.4797	10.3765	15.2555	15.2648	15.824
UBE2M	-0.669663	4.55632e-32	1.58709e-31	None	15.3663	25.4367	0.604101	chr19	59067079	59070327	-	ENSG00000130725.3	24.1293	26.1237	26.0572	15.5957	14.8441	15.6592
ATP1A1	0.343173	5.9682e-32	2.07769e-31	None	169.425	144.101	1.17574	chr1	116915290	116952883	+	ENSG00000163399.11	140.688	147.919	143.695	172.93	172.695	162.652
MRPL47	-0.751902	6.01916e-32	2.09422e-31	None	15.3652	28.3393	0.542186	chr3	179306073	179322442	-	ENSG00000136522.9	29.2055	28.3948	27.4177	15.132	16.8784	14.0851
GPX4	0.674942	6.14423e-32	2.13651e-31	None	84.6228	57.4266	1.47358	chr19	1103936	1106787	+	ENSG00000167468.12	54.591	63.3561	54.3326	81.7407	85.7226	86.4052
FASTKD2	-0.62719	7.89692e-32	2.74439e-31	None	8.6136	14.8624	0.579556	chr2	207630081	207657233	+	ENSG00000118246.9	15.7396	14.3138	14.5339	8.50847	8.66486	8.66747
PDE4D	0.535845	8.29535e-32	2.88119e-31	None	15.723	10.4846	1.49963	chr5	58264865	59817947	-	ENSG00000113448.12	10.4797	9.97521	10.9988	15.0994	14.8047	17.2648
MIEF2	0.473842	9.10698e-32	3.16127e-31	None	22.7378	18.4951	1.2294	chr17	18163848	18169866	+	ENSG00000177427.8	20.1364	18.2244	17.1244	23.6911	21.5478	22.9744
H3F3B	-0.374208	9.30817e-32	3.22926e-31	None	119.882	174.13	0.688467	chr17	73772515	73781974	-	ENSG00000132475.4	169.536	181.051	171.802	114.201	120.269	125.178
PTPRK	0.403146	9.55017e-32	3.31131e-31	None	29.2719	23.9469	1.22237	chr6	128289924	128841870	-	ENSG00000152894.10	23.2775	24.9764	23.5869	29.6507	27.9043	30.2608
TMEM9	0.632208	1.0517e-31	3.64445e-31	None	20.3662	14.2754	1.42667	chr1	201103900	201140702	-	ENSG00000116857.12	13.2246	14.9501	14.6514	20.5515	20.8848	19.6624
EARS2	-0.54672	1.07506e-31	3.72324e-31	None	9.54109	14.0273	0.680178	chr16	23533335	23569052	-	ENSG00000103356.11	14.0676	13.9507	14.0638	9.55556	9.9081	9.15962
RECQL5	0.639186	1.18565e-31	4.1039e-31	None	21.6186	14.2961	1.5122	chr17	73622925	73663269	-	ENSG00000108469.10	14.1295	13.4657	15.293	21.4756	21.4751	21.905
SUPV3L1	-0.619138	1.35941e-31	4.70266e-31	None	9.22955	15.069	0.612486	chr10	70939988	70968855	+	ENSG00000156502.9	15.5071	15.3434	14.3564	9.3384	9.60741	8.74284
TMCO3	0.647397	1.38368e-31	4.78387e-31	None	15.1925	11.0893	1.37002	chr13	114145310	114204542	+	ENSG00000150403.13	11.1228	10.5076	11.6374	16.4853	15.0144	14.0778
ITPR3	-0.365485	1.46985e-31	5.07888e-31	None	24.3073	33.843	0.718238	chr6	33588142	33664351	+	ENSG00000096433.6	33.3515	33.788	34.3896	24.9857	24.1405	23.7959
THOP1	-0.577018	1.50713e-31	5.20472e-31	None	15.2694	24.527	0.622556	chr19	2785458	2813599	+	ENSG00000172009.10	23.8943	25.1273	24.5593	15.2014	15.1615	15.4452
CTDSP1	0.565288	1.561e-31	5.38769e-31	None	25.6515	18.7976	1.36462	chr2	219262979	219270664	+	ENSG00000144579.3	17.2014	20.0412	19.1502	25.2307	26.0853	25.6386
FANCI	-0.38967	1.60487e-31	5.53594e-31	None	45.1096	67.3816	0.669464	chr15	89787180	89860492	+	ENSG00000140525.13	73.8925	55.5126	72.7398	42.3901	56.4772	36.4614
DHX15	-0.393192	1.69127e-31	5.83063e-31	None	57.5495	78.2254	0.735688	chr4	24519064	24586173	-	ENSG00000109606.8	80.673	75.7299	78.2734	57.8829	58.9467	55.819
SRPK1	-0.423006	1.9871e-31	6.84658e-31	None	42.1401	56.8468	0.741292	chr6	35800743	35889119	-	ENSG00000096063.10	58.9578	55.3281	56.2545	43.514	43.6645	39.2418
B2M	0.546224	2.13362e-31	7.34725e-31	None	201.673	148.812	1.35522	chr15	45003675	45011075	+	ENSG00000166710.13	153.408	146.548	146.479	211.369	216.365	177.286
ARF5	0.503573	2.27644e-31	7.83459e-31	None	48.302	36.6833	1.31673	chr7	127228399	127231759	+	ENSG00000004059.6	37.0199	36.5512	36.4788	51.3121	49.0365	44.5572
CSNK1G1	0.423141	2.30152e-31	7.9164e-31	None	10.8873	8.97391	1.21322	chr15	64457716	64648442	-	ENSG00000169118.11	9.1109	8.69613	9.11471	11.0532	10.9327	10.676
BAG3	-0.546711	2.65486e-31	9.12654e-31	None	15.4915	24.7619	0.625619	chr10	121410882	121437331	+	ENSG00000151929.5	23.6095	25.139	25.5373	15.7168	15.2811	15.4768
PHF6	0.42331	2.79267e-31	9.59484e-31	None	32.7306	26.3512	1.24209	chrX	133507283	133562820	+	ENSG00000156531.12	27.0346	25.6626	26.3566	32.6427	33.7921	31.757
SLC25A6	0.673549	2.89665e-31	9.94642e-31	None	13.8782	9.52756	1.45664	chrY	1455045	1461617	-	ENSGR0000169100.8	9.21405	10.0712	9.29739	14.0286	13.5234	14.0825
TMEM63B	0.554338	2.97673e-31	1.02156e-30	None	18.117	13.6621	1.32608	chr6	44094651	44123256	+	ENSG00000137216.14	13.5539	14.2007	13.2318	18.8841	17.3717	18.0954
TMEM147	-0.491579	2.9807e-31	1.02234e-30	None	40.0045	60.9824	0.656001	chr19	36036497	36038428	+	ENSG00000105677.7	61.1715	60.7296	61.0462	41.0627	40.6132	38.3376
ZNF581	0.733782	3.16537e-31	1.08507e-30	None	16.6537	10.8355	1.53696	chr19	56146825	56156988	+	ENSG00000171425.5	11.0834	10.7015	10.7214	17.0039	16.1061	16.851
RWDD4	-0.819391	3.28275e-31	1.12466e-30	None	7.28869	13.1281	0.555196	chr4	184560788	184580378	-	ENSG00000182552.10	15.8342	12.1364	11.4138	7.61007	8.01973	6.23626
ITGAV	0.421108	3.57363e-31	1.22363e-30	None	62.0229	49.6428	1.24938	chr2	187454792	187545628	+	ENSG00000138448.7	52.0713	47.624	49.2332	63.7224	62.667	59.6795
NEDD4	-0.453768	3.6272e-31	1.24126e-30	None	19.4361	24.4637	0.794488	chr15	56119120	56285944	-	ENSG00000069869.11	25.3686	24.0944	23.9282	19.3577	19.1844	19.7663
RPL10A	0.3828	3.75941e-31	1.28578e-30	None	406.736	317.44	1.2813	chr6	35436185	35438562	+	ENSG00000198755.6	322.231	326.003	304.084	408.982	414.566	396.659
HELLS	-0.459835	4.27055e-31	1.45977e-30	None	38.0723	54.3465	0.700547	chr10	96305547	96373662	+	ENSG00000119969.10	56.8374	51.7115	54.4907	37.8272	37.3047	39.0849
DENND4A	0.531132	4.32719e-31	1.47829e-30	None	12.8372	9.51454	1.34922	chr15	65950384	66084631	-	ENSG00000174485.10	10.1137	9.20465	9.22524	13.0728	12.2186	13.2201
LEMD2	0.541449	4.80265e-31	1.6398e-30	None	20.8478	16.569	1.25824	chr6	33738979	33756913	-	ENSG00000161904.7	15.9153	17.0033	16.7883	21.0231	21.2891	20.2312
FHL2	-0.565744	5.07202e-31	1.73079e-30	None	17.5766	29.2154	0.60162	chr2	105974169	106054970	-	ENSG00000115641.14	28.6597	29.433	29.5535	17.7491	18.2191	16.7615
PRKAR1A	0.35594	5.5593e-31	1.896e-30	None	85.3434	70.3243	1.21357	chr17	66507921	66547460	+	ENSG00000108946.10	70.9175	67.7129	72.3425	86.4218	88.7515	80.8569
SLC25A6	0.670558	6.03228e-31	2.05615e-30	None	13.0363	8.94552	1.45729	chrX	1505045	1511617	-	ENSG00000169100.8	8.74064	9.15315	8.94278	13.5976	12.9965	12.5147
C2CD3	0.505152	6.16498e-31	2.1002e-30	None	12.6723	9.87822	1.28286	chr11	73723763	73882255	-	ENSG00000168014.12	9.07342	10.025	10.5362	12.7277	12.2063	13.0829
SOD2	-0.482789	6.56699e-31	2.23589e-30	None	15.3369	23.7494	0.64578	chr6	160090089	160183561	-	ENSG00000112096.12	21.0783	29.6021	20.5679	14.0224	19.1143	12.874
STOML2	-0.480183	6.5971e-31	2.24487e-30	None	36.962	55.3479	0.667811	chr9	35099888	35103154	-	ENSG00000165283.11	54.7034	56.7872	54.5531	37.6835	37.9568	35.2456
SLC48A1	0.790715	7.28796e-31	2.47856e-30	None	10.2235	6.91407	1.47866	chr12	48147699	48176536	+	ENSG00000211584.9	6.8024	7.36032	6.57949	10.1556	10.5988	9.91624
L3MBTL1	0.929293	7.43227e-31	2.52622e-30	None	11.2213	6.5523	1.71258	chr20	42136320	42179590	+	ENSG00000185513.10	6.47685	6.78568	6.39436	10.7946	10.4018	12.4676
PPP3R1	-0.45647	8.01617e-31	2.72315e-30	None	30.2035	44.3741	0.680657	chr2	68405989	68483369	-	ENSG00000221823.6	45.9474	43.5675	43.6075	30.8438	31.5239	28.2429
ZCCHC6	0.518321	8.0519e-31	2.73375e-30	None	11.6484	8.27309	1.40798	chr9	88902648	88969369	-	ENSG00000083223.13	8.26099	8.32884	8.22944	12.0669	11.9749	10.9034
TAGLN2	-0.457531	8.72542e-31	2.96076e-30	None	64.0707	95.0738	0.673906	chr1	159887897	159895522	-	ENSG00000158710.10	91.8171	96.5694	96.8348	66.6577	66.856	58.6985
SQLE	-0.476787	8.83935e-31	2.99774e-30	None	16.3057	24.4827	0.666009	chr8	126010739	126034525	+	ENSG00000104549.7	24.9613	23.8948	24.5921	16.6855	16.7549	15.4767
PMM2	-0.544417	8.94495e-31	3.03185e-30	None	12.9795	19.0996	0.679569	chr16	8882680	8943188	+	ENSG00000140650.7	18.5686	19.7935	18.9367	12.6367	13.8988	12.4031
PSMC3	-0.519014	8.9827e-31	3.04293e-30	None	36.1408	55.675	0.64914	chr11	47440320	47447993	-	ENSG00000165916.4	54.1346	58.9044	53.986	36.0279	37.9441	34.4505
MAPK13	0.54968	9.18312e-31	3.10908e-30	None	30.0308	22.5831	1.32979	chr6	36095586	36107842	+	ENSG00000156711.12	21.1844	23.1104	23.4545	31.4665	29.9631	28.6629
BAZ1A	-0.527061	9.95394e-31	3.36817e-30	None	9.88531	14.483	0.682546	chr14	35221937	35344853	-	ENSG00000198604.6	15.4064	14.0639	13.9786	9.64587	10.4281	9.58191
TPRG1L	0.60204	1.03222e-30	3.49084e-30	None	19.2977	13.7386	1.40463	chr1	3541566	3546691	+	ENSG00000158109.10	12.9804	14.0434	14.1921	19.6889	18.704	19.5002
AFF1	0.464954	1.08625e-30	3.67149e-30	None	20.0058	16.4199	1.21839	chr4	87856154	88062206	+	ENSG00000172493.16	16.1764	18.0207	15.0624	19.5971	18.7954	21.6249
TMBIM6	0.323005	1.18681e-30	4.00913e-30	None	279.833	242.641	1.15328	chr12	50101508	50158717	+	ENSG00000139644.8	239.013	244.028	244.882	284.606	289.153	265.741
MRPS5	-0.524134	1.18849e-30	4.01255e-30	None	20.1779	31.1924	0.646885	chr2	95752952	95815179	-	ENSG00000144029.7	31.7523	31.2352	30.5895	20.9153	21.2468	18.3715
ICMT	-0.423224	1.29795e-30	4.37969e-30	None	24.8991	37.1678	0.669912	chr1	6281253	6296032	-	ENSG00000116237.11	36.4559	37.0156	38.0318	23.0755	26.0468	25.5751
TOP3A	-0.385789	1.35635e-30	4.57419e-30	None	44.7602	64.3228	0.695869	chr17	18174742	18218321	-	ENSG00000177302.10	62.8196	65.0541	65.0945	46.325	48.4555	39.5001
SCAMP1	0.604483	1.4433e-30	4.86468e-30	None	23.9408	18.0098	1.32932	chr5	77656339	77776562	+	ENSG00000085365.13	23.6539	11.0756	19.3	21.6137	28.5641	21.6446
METTL16	-0.481233	1.46748e-30	4.94344e-30	None	9.49728	16.2395	0.584826	chr17	2308856	2415185	-	ENSG00000127804.8	16.9704	14.1087	17.6394	9.5831	9.55658	9.35215
MRPL21	-0.797535	1.68952e-30	5.68822e-30	None	11.3738	23.1939	0.49038	chr11	68658744	68671303	-	ENSG00000197345.8	23.4346	23.2313	22.9159	12.148	11.153	10.8206
DDX54	-0.467944	1.7305e-30	5.82295e-30	None	12.2243	18.15	0.673516	chr12	113594979	113623284	-	ENSG00000123064.8	18.0306	18.3031	18.1161	12.0223	12.8661	11.7845
DMAP1	0.517274	1.79342e-30	6.03131e-30	None	18.6483	14.2976	1.3043	chr1	44679127	44686353	+	ENSG00000178028.9	13.76	15.6191	13.5135	18.1556	18.8574	18.9319
RRM1	-0.41629	1.82282e-30	6.12679e-30	None	31.4382	45.3257	0.693607	chr11	4115937	4160106	+	ENSG00000167325.10	46.1197	44.1579	45.6996	31.9446	33.6341	28.736
PRDM2	0.391924	1.92631e-30	6.47104e-30	None	21.2457	16.8881	1.25802	chr1	14026693	14151574	+	ENSG00000116731.18	17.2604	16.4827	16.9214	21.6045	21.3938	20.7387
RAI1	0.473581	1.95076e-30	6.54952e-30	None	59.4616	45.7698	1.29915	chr17	17584787	17714767	+	ENSG00000108557.13	43.4474	47.5467	46.3151	59.626	59.0877	59.671
ERICH1	0.844706	2.00493e-30	6.72765e-30	None	11.5796	6.66866	1.73642	chr8	564746	688106	-	ENSG00000104714.9	6.51363	6.7606	6.73175	11.077	10.8225	12.8392
TARDBP	-0.393387	2.06321e-30	6.91937e-30	None	63.3824	85.7309	0.739318	chr1	11072414	11085796	+	ENSG00000120948.11	87.7964	86.0034	83.3928	63.6761	65.1755	61.2956
FAT1	0.31966	2.34457e-30	7.85424e-30	None	63.1869	54.0602	1.16882	chr4	187508937	187647876	-	ENSG00000083857.9	54.8286	53.6281	53.7239	63.7975	64.3232	61.4399
CYTH2	0.550505	2.34383e-30	7.85424e-30	None	14.8653	12.1669	1.22178	chr19	48972289	48985571	+	ENSG00000105443.9	11.0968	12.8277	12.5762	15.8899	13.828	14.878
CBX3	-0.457224	2.61505e-30	8.75547e-30	None	74.8542	107.996	0.693121	chr7	26240782	26252976	+	ENSG00000122565.14	111.265	105.387	107.336	77.6158	78.7529	68.1938
TANC1	0.474626	2.76998e-30	9.26908e-30	None	14.2396	10.748	1.32486	chr2	159825146	160089170	+	ENSG00000115183.9	10.7499	10.4552	11.0389	14.0767	14.1579	14.4842
CGGBP1	0.437628	2.87661e-30	9.62056e-30	None	36.4684	32.7475	1.11363	chr3	88101094	88199035	-	ENSG00000163320.6	33.3131	33.7528	31.1765	36.1303	36.9546	36.3203
HIST1H2AG	-0.392476	3.11099e-30	1.03987e-29	None	75.1539	106.631	0.704803	chr6	27100832	27103070	+	ENSG00000196787.2	104.637	108.449	106.807	76.5626	73.878	75.0211
IFIT5	-0.619091	3.31351e-30	1.10695e-29	None	7.04798	11.7023	0.602275	chr10	91174343	91180758	+	ENSG00000152778.7	12.5136	11.4315	11.1617	7.28904	7.14921	6.70571
POU2F1	0.390406	3.36857e-30	1.12472e-29	None	12.8047	10.4484	1.22553	chr1	167190066	167396582	+	ENSG00000143190.17	10.1729	10.8226	10.3496	12.6947	12.9126	12.8069
CCDC138	-0.772474	3.51948e-30	1.17381e-29	None	5.16851	10.0352	0.515038	chr2	109403213	109501933	+	ENSG00000163006.7	10.2153	9.64985	10.2405	5.36143	4.6731	5.47102
HIST1H4I	-0.628091	3.51908e-30	1.17381e-29	None	21.6603	36.1881	0.598549	chr6	27107076	27108418	+	ENSG00000198339.3	34.3491	38.904	35.3112	21.2208	22.0495	21.7106
TMEM87B	0.47799	3.84137e-30	1.28046e-29	None	11.1009	8.53996	1.29988	chr2	112812800	112876895	+	ENSG00000153214.5	8.50538	8.58104	8.53346	11.0669	11.622	10.6139
OCLN	0.524386	3.90817e-30	1.302e-29	None	13.3803	10.6999	1.2505	chr5	68788119	68853931	+	ENSG00000197822.6	11.0613	11.3125	9.72606	12.3415	14.6739	13.1256
AP3S1	0.442298	4.02496e-30	1.34018e-29	None	59.9207	48.0927	1.24594	chr5	115177178	115249778	+	ENSG00000177879.10	51.6629	46.3468	46.2685	59.5096	63.53	56.7225
ADCY3	-0.551232	4.25418e-30	1.41572e-29	None	17.6034	28.2818	0.62243	chr2	25042038	25142708	-	ENSG00000138031.10	26.3541	27.9167	30.5747	17.2661	18.0622	17.4821
C2orf44	-0.547147	4.39132e-30	1.46055e-29	None	7.20209	11.3697	0.633447	chr2	24252210	24272445	-	ENSG00000163026.7	11.3298	11.404	11.3753	7.54748	7.27159	6.78721
EIF5B	-0.536643	4.50844e-30	1.49868e-29	None	9.75489	14.8833	0.655424	chr2	99953816	100017789	+	ENSG00000158417.6	15.3049	14.9018	14.4433	9.5733	10.6836	9.00778
TCERG1	-0.444777	4.51917e-30	1.50142e-29	None	26.939	36.139	0.745428	chr5	145826874	145891524	+	ENSG00000113649.7	39.5905	34.5897	34.2366	27.4162	25.5432	27.8576
ZNF652	0.448746	4.54396e-30	1.50883e-29	None	19.3934	15.1077	1.28368	chr17	47366568	47439835	-	ENSG00000198740.4	14.9216	14.9046	15.497	19.8347	19.6594	18.6862
NUP210	0.449614	4.88361e-30	1.62071e-29	None	12.6218	9.91012	1.27363	chr3	13357737	13461809	-	ENSG00000132182.7	9.69818	9.97159	10.0606	12.5204	12.7531	12.5919
BTBD3	0.464054	5.99789e-30	1.98941e-29	None	37.9814	27.4924	1.38153	chr20	11871371	11907257	+	ENSG00000132640.10	26.2757	27.6874	28.514	36.6465	37.7659	39.5319
DDX19A	-0.592788	6.63382e-30	2.19914e-29	None	8.09321	13.7819	0.587234	chr16	70380732	70407286	+	ENSG00000168872.11	13.9588	13.8942	13.4928	7.72791	8.54446	8.00727
AES	0.513839	7.13686e-30	2.3646e-29	None	53.5738	40.3236	1.3286	chr19	3052908	3063105	-	ENSG00000104964.10	37.241	42.0503	41.6797	53.9877	53.8918	52.8419
C11orf80	0.781652	7.41302e-30	2.45475e-29	None	13.7796	8.28324	1.66355	chr11	66511922	66610987	+	ENSG00000173715.11	8.26278	8.03932	8.54763	13.1937	13.4919	14.653
NHP2L1	-0.485845	7.58811e-30	2.51135e-29	None	32.2209	46.7909	0.688615	chr22	42069934	42086508	-	ENSG00000100138.9	45.6856	47.8159	46.8712	34.2414	32.5411	29.8803
NOA1	0.558938	7.66993e-30	2.53704e-29	None	11.8846	8.71554	1.36361	chr4	57829536	57844989	-	ENSG00000084092.6	8.68678	8.66366	8.79617	11.6354	12.6668	11.3518
SKAP2	0.478401	7.76856e-30	2.56826e-29	None	16.0996	12.3075	1.30811	chr7	26706681	27034858	-	ENSG00000005020.8	11.7	12.2932	12.9293	16.5111	16.2098	15.578
C8orf33	-0.573426	7.8824e-30	2.60447e-29	None	10.3354	16.5307	0.625224	chr8	146277764	146281416	+	ENSG00000182307.8	16.4529	16.6757	16.4636	10.2065	11.2008	9.59899
HIST1H1B	-0.633431	8.92218e-30	2.94642e-29	None	65.5835	110.049	0.595949	chr6	27834570	27835359	-	ENSG00000184357.3	106.793	118.514	104.84	62.4349	65.4051	68.9103
GOLGA2	0.482063	9.38829e-30	3.09865e-29	None	25.3972	19.9144	1.27532	chr9	131018108	131038274	-	ENSG00000167110.12	19.2032	20.233	20.3069	24.8037	26.336	25.0519
RNPS1	-0.411801	1.00923e-29	3.32921e-29	None	69.7843	104.331	0.668873	chr16	2303117	2318413	-	ENSG00000205937.7	103.367	104.478	105.147	69.1252	69.3432	70.8843
TPD52L2	-0.427618	1.11152e-29	3.66463e-29	None	39.297	57.6826	0.681264	chr20	62496596	62522898	+	ENSG00000101150.13	56.6237	59.2723	57.1517	40.4038	41.0128	36.4745
SAMD1	-0.583521	1.1412e-29	3.76041e-29	None	14.438	23.3962	0.617111	chr19	14198652	14201848	-	ENSG00000141858.7	23.2098	24.5622	22.4166	14.0476	14.6652	14.6012
ANXA7	-0.448918	1.21433e-29	3.99922e-29	None	21.5024	31.7829	0.676541	chr10	75134859	75173834	-	ENSG00000138279.11	33.5014	31.4616	30.3858	22.8235	21.4333	20.2506
NCAPG2	-0.459739	1.34333e-29	4.42164e-29	None	12.769	19.1459	0.666933	chr7	158424003	158497520	-	ENSG00000146918.15	19.2218	19.281	18.9349	12.9042	13.1036	12.2993
C5orf38	1.08331	1.37156e-29	4.51209e-29	Up	12.5125	6.66547	1.87721	chr5	2752245	2755508	+	ENSG00000186493.7	5.64103	7.40664	6.94875	12.2362	12.3985	12.9027
ZMYM4	0.377798	1.42983e-29	4.70124e-29	None	30.7728	26.1569	1.17647	chr1	35734568	35887659	+	ENSG00000146463.7	27.0057	26.0134	25.4516	29.8027	31.4207	31.0952
SEC23IP	-0.47397	1.61486e-29	5.30672e-29	None	11.672	16.7956	0.694946	chr10	121652223	121702014	+	ENSG00000107651.8	16.6505	17.0368	16.6994	11.7806	11.6501	11.5854
ARHGAP32	0.418214	1.68431e-29	5.53194e-29	None	13.082	10.5568	1.2392	chr11	128834955	129149219	-	ENSG00000134909.14	10.5229	10.7221	10.4255	12.9349	12.9672	13.3439
HNRNPD	-0.452813	1.68561e-29	5.53321e-29	None	31.3944	47.4142	0.66213	chr4	83273651	83295656	-	ENSG00000138668.14	47.8847	47.6026	46.7554	31.0836	33.2689	29.8306
NSMF	-0.529371	1.73355e-29	5.68746e-29	None	9.71911	14.8338	0.655201	chr9	140342022	140353786	-	ENSG00000165802.15	14.5015	14.8165	15.1833	10.078	10.0509	9.02844
NFYC	0.622925	1.84897e-29	6.06286e-29	None	29.9792	21.1473	1.41764	chr1	41157320	41237275	+	ENSG00000066136.15	20.3514	22.0704	21.0201	30.7655	28.8492	30.3231
FSTL1	0.489685	1.8853e-29	6.17862e-29	None	15.8588	12.5517	1.26348	chr3	120111140	120170100	-	ENSG00000163430.5	12.794	13.0531	11.808	16.1448	16.6589	14.7728
MCM2	-0.441099	2.04213e-29	6.68899e-29	None	35.9525	53.1511	0.676421	chr3	127317066	127341276	+	ENSG00000073111.9	50.3562	53.9319	55.1651	37.2957	36.6829	33.8789
TBL3	-0.552333	2.05262e-29	6.7197e-29	None	6.917	10.5281	0.657005	chr16	2022038	2032934	+	ENSG00000183751.10	12.5317	9.99959	9.05294	5.52269	9.58442	5.64389
MRPL42	-0.566188	2.06674e-29	6.76225e-29	None	19.6444	32.964	0.595937	chr12	93861264	93897545	+	ENSG00000198015.8	32.3004	34.4034	32.1881	18.6493	20.8548	19.4293
TSPAN13	0.507213	2.0902e-29	6.83532e-29	None	46.2523	35.0818	1.31841	chr7	16793160	16824161	+	ENSG00000106537.7	35.2962	33.4094	36.5399	48.9409	47.0445	42.7715
KMT2E	0.491694	2.11933e-29	6.92682e-29	None	14.5365	10.1721	1.42905	chr7	104654626	104754808	+	ENSG00000005483.15	10.7819	9.7858	9.9487	14.1081	13.8435	15.6579
MYOF	0.322554	2.68176e-29	8.76033e-29	None	95.2168	80.0314	1.18974	chr10	95066186	95242074	-	ENSG00000138119.12	82.1827	79.1712	78.7404	95.4834	97.0693	93.0977
TCEB1	-0.687896	3.01783e-29	9.85281e-29	None	28.2798	49.3427	0.57313	chr8	74851404	74884522	-	ENSG00000154582.12	45.8351	53.2584	48.9347	33.0535	28.8807	22.9052
BCS1L	-0.644668	3.4776e-29	1.13478e-28	None	12.9868	21.0842	0.615949	chr2	219523487	219528166	+	ENSG00000074582.8	19.7817	19.5308	23.9401	14.5065	12.5599	11.894
CAPN15	-0.526953	3.67976e-29	1.20009e-28	None	13.0114	19.3142	0.673673	chr16	577717	604636	+	ENSG00000103326.6	18.4938	19.5746	19.8741	12.9068	12.7577	13.3698
EPN2	0.448566	4.49003e-29	1.46356e-28	None	40.5903	33.2577	1.22048	chr17	19118928	19240028	+	ENSG00000072134.11	33.7148	34.0225	32.0358	37.4822	38.2702	46.0185
ITPK1	-0.568322	4.51682e-29	1.4715e-28	None	11.8013	20.533	0.574751	chr14	93403259	93582665	-	ENSG00000100605.12	23.0376	21.5786	16.9827	13.4342	10.8387	11.1311
GPI	-0.381821	4.53948e-29	1.47808e-28	None	115.67	169.771	0.68133	chr19	34850385	34893061	+	ENSG00000105220.10	161.288	175.133	172.891	116.552	119.688	110.769
RNPEPL1	0.574923	4.75141e-29	1.54626e-28	None	10.1927	7.07386	1.4409	chr2	241505221	241520789	+	ENSG00000142327.7	6.78508	7.15128	7.2852	9.62853	10.6588	10.2909
RIMKLB	0.469262	4.7872e-29	1.55706e-28	None	21.3132	15.7826	1.35042	chr12	8834196	8935691	+	ENSG00000166532.11	14.6971	16.2966	16.354	22.6591	19.9117	21.3686
RAB8A	-0.422865	4.92948e-29	1.60248e-28	None	26.3369	37.1993	0.707995	chr19	16222439	16245044	+	ENSG00000167461.7	36.5837	38.1237	36.8904	25.8457	27.0988	26.0662
HIST3H2BB	-0.89892	4.96101e-29	1.61186e-28	None	24.7866	49.9987	0.495744	chr1	228645808	228646259	+	ENSG00000196890.3	46.3418	54.8823	48.772	23.5864	24.1305	26.6428
CCNF	-0.404381	5.05036e-29	1.64001e-28	None	23.3554	33.3865	0.699545	chr16	2479395	2508855	+	ENSG00000162063.8	32.614	33.9009	33.6446	22.8934	24.2144	22.9583
TANC2	0.370119	5.40653e-29	1.75473e-28	None	67.7636	55.1789	1.22807	chr17	61086917	61505060	+	ENSG00000170921.10	54.6952	56.8375	54.0039	62.4331	68.1547	72.7029
API5	-0.402409	5.45116e-29	1.76826e-28	None	48.8926	65.5565	0.745809	chr11	43333513	43366079	+	ENSG00000166181.8	63.3356	69.4762	63.8577	51.9146	47.8555	46.9079
IDS	0.47864	5.4628e-29	1.77108e-28	None	18.4449	14.5304	1.26941	chrX	148558521	148615470	-	ENSG00000010404.13	14.0444	15.7641	13.7826	17.8839	19.4245	18.0264
MLF1	0.738347	5.48849e-29	1.77846e-28	None	12.8563	7.11308	1.80742	chr3	158288952	158325041	+	ENSG00000178053.13	6.43061	7.44465	7.46399	15.4107	12.9962	10.162
EXT2	0.396161	5.78833e-29	1.87461e-28	None	29.5216	24.1478	1.22254	chr11	44117099	44266979	+	ENSG00000151348.9	23.7661	24.2889	24.3883	29.5375	30.1907	28.8364
P4HA1	0.571001	6.60907e-29	2.13927e-28	None	20.5809	14.838	1.38704	chr10	74766975	74856732	-	ENSG00000122884.8	15.498	14.7511	14.2649	21.8753	21.2352	18.6324
KLF3	0.389643	7.40302e-29	2.39498e-28	None	24.79	19.9734	1.24115	chr4	38665817	38702663	+	ENSG00000109787.8	19.9953	19.5895	20.3352	25.0737	25.236	24.0604
STX16	0.497765	7.90048e-29	2.55454e-28	None	19.4813	15.8377	1.23006	chr20	57226328	57254582	+	ENSG00000124222.17	16.256	15.2718	15.9854	19.2373	19.6353	19.5713
POLR1C	-0.68327	8.02746e-29	2.59421e-28	None	10.6718	18.5757	0.574502	chr6	43477440	43497323	+	ENSG00000171453.13	18.1542	18.9796	18.5934	10.7283	10.9409	10.3462
SOX9	-0.568224	8.41707e-29	2.71867e-28	None	8.85372	14.178	0.62447	chr17	70117161	70122561	+	ENSG00000125398.5	14.7194	13.814	14.0005	9.19811	9.35939	8.00366
XPO1	-0.383383	8.4427e-29	2.72549e-28	None	117.206	160.723	0.729243	chr2	61704984	61765761	-	ENSG00000082898.12	171.964	163.545	146.66	122.983	121.302	107.332
CNBP	-0.400569	9.92408e-29	3.202e-28	None	111.974	159.255	0.703111	chr3	128888327	128902765	-	ENSG00000169714.12	163.235	158.641	155.89	116.677	115.678	103.567
NR2F2	0.356737	9.9505e-29	3.20881e-28	None	67.4084	55.8594	1.20675	chr15	96869167	96883492	+	ENSG00000185551.8	55.9906	55.168	56.4196	67.177	70.2208	64.8275
ZCCHC11	0.420786	1.02314e-28	3.29763e-28	None	24.3988	16.9471	1.43971	chr1	52873954	53019159	-	ENSG00000134744.9	17.1909	15.9459	17.7043	24.0861	27.7102	21.4
ATG16L1	-0.578163	1.22056e-28	3.93184e-28	None	10.5504	17.0148	0.620071	chr2	234118697	234204320	+	ENSG00000085978.17	17.8835	16.9838	16.177	11.092	10.7057	9.85348
ZDHHC13	0.505147	1.23702e-28	3.98272e-28	None	16.3968	12.9994	1.26135	chr11	19138646	19197969	+	ENSG00000177054.9	13.1285	12.8448	13.0248	16.6303	16.7205	15.8395
REST	0.444656	1.29146e-28	4.15577e-28	None	11.8495	9.3081	1.27304	chr4	57774075	57802010	+	ENSG00000084093.11	9.60309	9.2723	9.04891	12.1082	11.7778	11.6626
PSMD8	-0.450902	1.4358e-28	4.6178e-28	None	36.1885	53.945	0.670841	chr19	38865176	38874464	+	ENSG00000099341.7	53.0477	55.9216	52.8657	36.3304	37.1954	35.0397
MTFR1	-0.482326	1.45798e-28	4.68665e-28	None	20.9239	30.4246	0.687729	chr8	66556969	66683496	+	ENSG00000066855.11	31.0219	28.9392	31.3127	21.139	21.6962	19.9365
TGOLN2	0.350094	1.54345e-28	4.95876e-28	None	45.7513	38.4309	1.19048	chr2	85545147	85555548	-	ENSG00000152291.9	38.7607	38.3068	38.2253	47.135	45.4243	44.6946
RNF217	0.533824	1.60895e-28	5.16643e-28	None	24.7787	16.9579	1.46119	chr6	125283691	125413779	+	ENSG00000146373.12	17.6439	15.9704	17.2595	25.3685	23.0607	25.907
PTRH2	-0.66478	1.6132e-28	5.17731e-28	None	11.786	21.9205	0.537668	chr17	57751997	57784987	-	ENSG00000141378.13	21.7508	23.3663	20.6445	11.4765	12.5417	11.3396
PSMD6	-0.568133	1.86912e-28	5.99548e-28	None	15.8641	27.9741	0.567101	chr3	63996225	64009658	-	ENSG00000163636.6	27.2225	29.6655	27.0344	16.7807	16.1133	14.6985
HIGD1A	-0.565211	2.07413e-28	6.64954e-28	None	24.714	40.2045	0.614707	chr3	42798669	42846023	-	ENSG00000181061.9	43.5767	39.9995	37.0375	25.2651	25.5871	23.2898
SLIRP	-0.875881	2.09969e-28	6.72793e-28	None	22.3863	45.0057	0.497411	chr14	78174414	78227447	+	ENSG00000119705.5	43.4374	50.4649	41.1149	21.3427	23.8444	21.9719
KIF23	-0.405569	2.48134e-28	7.94662e-28	None	31.9173	44.5323	0.716723	chr15	69706585	69740764	+	ENSG00000137807.9	45.8125	44.5265	43.258	32.3892	33.342	30.0207
VPS8	0.503149	2.86401e-28	9.16725e-28	None	31.6351	21.9967	1.43818	chr3	184529931	184770402	+	ENSG00000156931.11	19.4403	23.8963	22.6533	31.4459	31.9413	31.518
NAMPT	-0.529135	2.96489e-28	9.48512e-28	None	7.63517	11.4397	0.667427	chr7	105888731	105926772	-	ENSG00000105835.7	11.8216	11.122	11.3756	8.007	7.60454	7.29396
NUP35	-0.586851	2.96773e-28	9.48918e-28	None	14.9625	25.8201	0.579489	chr2	183982241	184026408	+	ENSG00000163002.8	27.5669	23.6076	26.2858	13.9708	16.7054	14.2113
RHBDF2	-0.663809	2.97405e-28	9.50438e-28	None	6.35928	12.2287	0.52003	chr17	74466973	74497872	-	ENSG00000129667.8	13.0297	11.9216	11.7348	6.42862	6.20261	6.4466
PLK4	-0.524986	3.0009e-28	9.58512e-28	None	9.36634	14.4143	0.649796	chr4	128802016	128820350	+	ENSG00000142731.6	15.0588	14.1165	14.0675	9.49776	9.30659	9.29466
PLK2	-0.410039	3.02359e-28	9.65246e-28	None	48.2367	64.6834	0.745736	chr5	57749809	57756087	-	ENSG00000145632.10	67.9495	62.0657	64.0351	49.7577	48.6457	46.3067
SLC9A1	0.510277	3.09861e-28	9.88674e-28	None	19.9359	15.4327	1.2918	chr1	27425306	27493472	-	ENSG00000090020.6	14.5	15.6267	16.1713	19.8471	19.8709	20.0898
CNPPD1	0.557757	3.28956e-28	1.04905e-27	None	19.0173	13.9974	1.35863	chr2	220036619	220042828	-	ENSG00000115649.11	13.691	13.6676	14.6337	19.654	18.8475	18.5504
STX17	0.494805	3.76242e-28	1.19921e-27	None	20.6015	15.3737	1.34005	chr9	102668915	102732618	+	ENSG00000136874.6	15.7341	15.076	15.311	21.0917	20.8544	19.8585
POLR3H	-0.617088	3.97239e-28	1.26547e-27	None	7.34029	12.3095	0.596312	chr22	41921808	41940610	-	ENSG00000100413.12	11.4606	11.8665	13.6013	7.48489	7.20417	7.33183
CALM2	-0.415235	4.04986e-28	1.28946e-27	None	270.625	491.68	0.550409	chr2	47387221	47403740	-	ENSG00000143933.12	514.508	488.832	471.7	275.215	290.493	246.166
EPGN	-0.837056	4.24537e-28	1.351e-27	None	8.02779	15.7278	0.510421	chr4	75174190	75181024	+	ENSG00000182585.5	16.0923	15.9864	15.1047	7.68174	8.64899	7.75265
CAT	0.634529	4.46134e-28	1.41898e-27	None	10.9313	7.3588	1.48547	chr11	34460472	34493609	+	ENSG00000121691.4	7.22665	7.54564	7.30412	11.0462	11.0839	10.6636
KDELR1	0.356126	4.59594e-28	1.46103e-27	None	105.091	87.1777	1.20548	chr19	48885827	48894810	-	ENSG00000105438.4	84.7056	88.0891	88.7385	107.244	105.623	102.405
MZT1	-0.609872	4.77168e-28	1.51609e-27	None	8.64389	14.2568	0.6063	chr13	73282495	73301825	-	ENSG00000204899.5	14.8021	13.9335	14.0347	8.91037	8.9431	8.07821
AURKB	-0.462025	4.87712e-28	1.54878e-27	None	48.5084	73.0873	0.663705	chr17	8108056	8113918	-	ENSG00000178999.8	70.421	71.8579	76.983	48.5353	48.4424	48.5474
TNNT1	0.964906	5.88255e-28	1.86708e-27	None	11.2452	6.2755	1.79192	chr19	55644162	55660722	-	ENSG00000105048.12	6.28344	6.06025	6.48282	10.9019	11.0588	11.7749
HSPE1	-1.25655	6.05156e-28	1.91972e-27	Down	57.5221	152.642	0.376845	chr2	198364718	198368181	+	ENSG00000115541.6	161.325	162.547	134.053	61.7221	59.0084	51.8359
RBM47	0.544127	6.65019e-28	2.10851e-27	None	14.2641	10.2669	1.38933	chr4	40425272	40632892	-	ENSG00000163694.10	9.92394	10.1213	10.7554	15.3684	14.009	13.4149
TMUB2	0.586344	7.41289e-28	2.3491e-27	None	18.8593	13.3823	1.40927	chr17	42264338	42269099	+	ENSG00000168591.11	13.4473	14.0825	12.617	18.2003	19.5684	18.8092
TMEM70	-0.787904	7.66914e-28	2.42903e-27	None	7.59694	13.5317	0.561416	chr8	74884672	74895018	+	ENSG00000175606.6	13.7063	13.566	13.323	8.52549	6.74577	7.51957
HAUS2	-0.640376	7.99954e-28	2.53235e-27	None	6.90172	11.698	0.58999	chr15	42841008	42862192	+	ENSG00000137814.5	10.4734	11.3293	13.2914	8.20274	6.56732	5.93511
SMPD4	-0.392344	8.54031e-28	2.70212e-27	None	18.3336	26.6163	0.688812	chr2	130908981	130940323	-	ENSG00000136699.15	25.856	27.2975	26.6954	18.5544	17.7148	18.7317
ZFP36L2	0.415753	8.83e-28	2.79231e-27	None	34.5877	28.0057	1.23502	chr2	43449541	43453748	-	ENSG00000152518.5	27.8719	27.0566	29.0885	34.4437	35.964	33.3555
GPATCH2L	0.443123	8.87658e-28	2.80558e-27	None	14.9455	13.905	1.07483	chr14	76618259	76720685	+	ENSG00000089916.13	14.2032	13.7333	13.7786	15.2916	14.7916	14.7533
PRKD2	0.53406	8.98986e-28	2.83989e-27	None	34.1255	25.6964	1.32803	chr19	47177532	47220384	-	ENSG00000105287.8	23.7618	26.2721	27.0552	33.4424	33.1452	35.7888
SMC4	-0.376547	9.4303e-28	2.97747e-27	None	60.0194	84.2479	0.712415	chr3	160117062	160152750	+	ENSG00000113810.11	87.0145	85.3515	80.3775	61.0388	61.9322	57.0872
GALNT2	0.389349	9.50766e-28	3.00033e-27	None	45.9803	37.7718	1.21732	chr1	230193536	230417870	+	ENSG00000143641.8	36.3982	39.4738	37.4436	45.3619	46.6934	45.8858
GSDMD	0.7103	1.0106e-27	3.18748e-27	None	15.9329	10.4299	1.52762	chr8	144635377	144645232	+	ENSG00000104518.6	9.87767	9.94444	11.4676	17.5446	15.6729	14.5814
SNAI2	-0.594283	1.27735e-27	4.02673e-27	None	10.9537	17.8366	0.614113	chr8	49830249	49834299	-	ENSG00000019549.4	18.5601	17.1646	17.7852	11.5737	10.8058	10.4817
PPP1R14B	-0.90125	1.30841e-27	4.1225e-27	None	8.35802	16.9133	0.494167	chr11	64011956	64014413	-	ENSG00000173457.6	15.5192	18.3847	16.8362	8.24476	8.32233	8.50696
PIM1	0.436503	1.359e-27	4.27965e-27	None	23.5053	18.7083	1.25641	chr6	37137979	37143202	+	ENSG00000137193.9	18.5269	18.7595	18.8384	24.1643	23.776	22.5756
ZNF189	0.599544	1.39565e-27	4.39276e-27	None	10.9508	7.86446	1.39244	chr9	104161155	104172942	+	ENSG00000136870.6	8.158	8.00887	7.4265	10.9651	10.9925	10.8949
PGLS	0.664825	1.53207e-27	4.81964e-27	None	30.0011	20.5047	1.46313	chr19	17622438	17632097	+	ENSG00000130313.2	18.9698	21.6803	20.8641	30.4765	29.2088	30.318
NUDT14	0.7875	1.56107e-27	4.9083e-27	None	18.2781	11.3718	1.60732	chr14	105639275	105647660	-	ENSG00000183828.10	11.8362	11.1956	11.0835	18.4066	18.9317	17.496
WBP2	0.578624	1.64219e-27	5.16067e-27	None	25.3606	18.3337	1.38328	chr17	73841780	73852588	-	ENSG00000132471.7	16.186	20.995	17.8202	25.3754	23.7387	26.9676
MFHAS1	-0.511649	1.66309e-27	5.22365e-27	None	6.5285	10.1459	0.643461	chr8	8640864	8751155	-	ENSG00000147324.6	10.1359	9.93885	10.363	6.55757	6.2492	6.77873
NUMB	0.412133	1.7436e-27	5.47367e-27	None	23.6317	18.6345	1.26817	chr14	73741815	73930348	-	ENSG00000133961.15	18.0082	19.1204	18.7749	23.2059	23.9313	23.7579
DSE	0.506023	1.76498e-27	5.53792e-27	None	11.2258	8.56656	1.31042	chr6	116575336	116762424	+	ENSG00000111817.12	8.67674	8.09196	8.93098	11.656	11.5931	10.4284
PHF3	0.488827	1.78025e-27	5.58293e-27	None	10.4302	7.96291	1.30984	chr6	64345725	64489229	+	ENSG00000118482.7	8.30435	7.91329	7.67109	10.6827	10.4438	10.164
TMEM177	-0.841736	1.91678e-27	6.00797e-27	None	5.83144	10.8116	0.539369	chr2	120436743	120444083	+	ENSG00000144120.8	10.4901	10.9363	11.0084	5.40942	6.07263	6.01226
ADCK4	0.662812	2.0583e-27	6.44821e-27	None	13.9464	9.69106	1.4391	chr19	41197434	41224112	-	ENSG00000123815.7	9.3474	9.45079	10.275	13.9571	13.65	14.2321
TTC3	0.38888	2.15157e-27	6.7369e-27	None	25.177	19.1757	1.31297	chr21	38445526	38575413	+	ENSG00000182670.9	21.6224	19.4646	16.4401	25.9254	25.3135	24.2922
YTHDF1	-0.465515	2.38599e-27	7.46704e-27	None	17.1294	25.6253	0.668458	chr20	61826781	61847586	-	ENSG00000149658.13	26.393	24.4916	25.9913	17.6392	17.652	16.0972
C1orf112	-0.43001	2.40954e-27	7.53683e-27	None	12.8554	18.3483	0.700631	chr1	169631245	169823221	+	ENSG00000000460.12	18.2263	18.6939	18.1246	12.6961	13.5974	12.2725
PSG8	0.697863	2.4928e-27	7.79323e-27	None	13.2935	8.93897	1.48714	chr19	43256838	43359843	-	ENSG00000124467.14	8.53064	9.36885	8.91743	13.1735	13.9062	12.8008
AMMECR1	-0.557658	2.82596e-27	8.83022e-27	None	12.1188	18.074	0.67051	chrX	109437414	109683461	-	ENSG00000101935.5	19.4411	16.9595	17.8212	12.5878	12.198	11.5705
CENPL	-0.580957	3.19712e-27	9.9848e-27	None	9.2729	15.2904	0.606454	chr1	173768688	173793858	-	ENSG00000120334.11	15.7357	14.3848	15.7506	9.49424	9.04449	9.27998
HIST1H1E	-0.492421	3.35965e-27	1.0487e-26	None	77.8896	118.473	0.657446	chr6	26156559	26157343	+	ENSG00000168298.4	113.911	122.372	119.135	77.1422	76.3821	80.1444
DDX46	-0.434165	3.38342e-27	1.05557e-26	None	21.3055	29.2942	0.727294	chr5	134094469	134190823	+	ENSG00000145833.11	29.6195	31.0194	27.2438	21.6864	21.3721	20.858
DBNL	0.47065	3.45797e-27	1.07827e-26	None	16.6989	18.4637	0.904419	chr7	44084239	44109055	+	ENSG00000136279.14	17.6289	18.2572	19.5049	17.1878	16.7835	16.1253
RNF13	0.49903	3.4626e-27	1.07916e-26	None	42.799	30.9502	1.38283	chr3	149530495	149679926	+	ENSG00000082996.15	33.0837	30.26	29.507	41.1729	43.3333	43.8909
CMSS1	-0.666672	3.51032e-27	1.09347e-26	None	11.6116	19.8452	0.585109	chr3	99536678	99897447	+	ENSG00000184220.6	19.5699	20.0199	19.9458	12.0602	11.2207	11.5539
CD99	1.19194	3.75787e-27	1.16997e-26	Up	12.3744	5.85502	2.11346	chrY	2559220	2609350	+	ENSGR0000002586.13	6.07139	5.51127	5.9824	9.62178	13.0366	14.4647
EXOSC8	-0.669664	3.98053e-27	1.23866e-26	None	10.6722	20.1744	0.528996	chr13	37572953	37583750	+	ENSG00000120699.8	19.3816	21.0523	20.0893	9.74922	12.131	10.1363
SERF2	0.490397	4.74688e-27	1.47637e-26	None	62.8562	50.113	1.25429	chr15	44069285	44094787	+	ENSG00000140264.15	44.7808	56.5422	49.0161	63.4362	63.8305	61.302
IPO11	-0.462533	4.94698e-27	1.53781e-26	None	11.9554	17.2476	0.693163	chr5	61699799	61924409	+	ENSG00000086200.12	18.0495	16.6534	17.0401	11.8394	12.2362	11.7907
ZMYM2	0.460329	5.05032e-27	1.56913e-26	None	30.0636	15.6088	1.92607	chr13	20532810	20665968	+	ENSG00000121741.12	15.6365	15.1794	16.0104	19.9608	34.2834	35.9467
RAVER2	0.444013	6.4347e-27	1.99823e-26	None	17.8487	14.178	1.25891	chr1	65210778	65298915	+	ENSG00000162437.10	14.5093	13.6829	14.3417	17.6628	18.4722	17.4111
RPL22L1	-0.867847	6.47111e-27	2.0085e-26	None	9.46924	18.3218	0.516829	chr3	170582664	170588272	-	ENSG00000163584.13	17.7793	18.4421	18.7441	10.6583	9.45231	8.29713
CDK1	-0.520195	6.7034e-27	2.07953e-26	None	49.1045	74.9754	0.654941	chr10	62538089	62554610	+	ENSG00000170312.11	78.3145	73.8744	72.7372	51.9262	51.583	43.8042
TRABD	-0.644553	7.00654e-27	2.17246e-26	None	6.81513	11.5297	0.591095	chr22	50624344	50638027	+	ENSG00000170638.5	11.0618	11.5683	11.9589	6.83603	6.97054	6.63881
DDX3X	-0.372788	7.46045e-27	2.31201e-26	None	36.6923	50.0745	0.732755	chrX	41192651	41223725	+	ENSG00000215301.5	51.4558	49.0755	49.6921	37.7929	37.1517	35.1323
VAMP2	0.715016	7.57985e-27	2.34781e-26	None	10.366	6.84066	1.51536	chr17	8062467	8066864	-	ENSG00000220205.4	6.63781	6.62672	7.25744	11.2316	10.1696	9.69694
U2AF2	-0.419393	9.32434e-27	2.88667e-26	None	34.5984	47.5797	0.727166	chr19	56165512	56186081	+	ENSG00000063244.8	45.7507	47.955	49.0336	34.3448	35.6321	33.8182
CLCN3	0.353507	9.51083e-27	2.9429e-26	None	22.5344	18.8101	1.198	chr4	170533784	170644824	+	ENSG00000109572.9	19.0087	19.1077	18.3138	22.656	23.0214	21.9259
ARID3A	0.504692	9.78285e-27	3.02552e-26	None	10.1087	7.16644	1.41055	chr19	925781	975939	+	ENSG00000116017.6	6.69258	7.61109	7.19566	10.0533	10.3709	9.90178
GTF3A	-0.610371	1.03289e-26	3.19276e-26	None	15.3195	24.142	0.634556	chr13	27998681	28009958	+	ENSG00000122034.8	23.3262	24.5998	24.5002	15.3385	16.2135	14.4064
CEP78	-0.451144	1.03733e-26	3.20483e-26	None	8.66739	13.435	0.645136	chr9	80850978	80894606	+	ENSG00000148019.8	12.8759	13.918	13.5111	8.81551	8.88333	8.30333
RHOC	0.369619	1.09502e-26	3.38039e-26	None	110.681	88.7564	1.24702	chr1	113243728	113250056	-	ENSG00000155366.12	81.4895	89.4566	95.323	106.45	107.854	117.738
TOP1	-0.433966	1.09527e-26	3.38039e-26	None	14.2956	20.8701	0.684977	chr20	39657458	39753127	+	ENSG00000198900.5	21.2001	20.7145	20.6958	14.0286	14.9631	13.8949
MBOAT2	0.418969	1.11725e-26	3.44646e-26	None	23.0543	16.6331	1.38605	chr2	8992820	9143942	-	ENSG00000143797.7	17.3599	15.5287	17.0106	23.7774	22.3564	23.029
RAD1	-0.497338	1.27389e-26	3.92767e-26	None	16.2	25.0487	0.646738	chr5	34905369	34919094	-	ENSG00000113456.14	26.2344	24.6792	24.2327	15.5729	16.8241	16.2029
SLC35B1	-0.513271	1.28018e-26	3.94504e-26	None	19.6752	34.5498	0.569473	chr17	47778305	47786376	-	ENSG00000121073.9	33.9059	36.5507	33.1929	20.0301	20.1504	18.8451
TBC1D17	0.699507	1.28103e-26	3.94565e-26	None	13.2763	9.49439	1.39834	chr19	50380682	50392005	+	ENSG00000104946.6	8.54382	9.26623	10.6731	13.317	13.2164	13.2956
GIGYF1	0.481279	1.40995e-26	4.34053e-26	None	10.0385	7.7445	1.29621	chr7	100277130	100287071	-	ENSG00000146830.9	7.39421	7.90113	7.93817	10.0708	9.91995	10.1249
CTTNBP2NL	0.436749	1.50302e-26	4.62469e-26	None	11.0739	8.23878	1.34412	chr1	112938803	113006078	+	ENSG00000143079.10	7.9915	8.3317	8.39313	11.0854	11.5729	10.5634
NBAS	0.455092	1.57786e-26	4.85248e-26	None	15.5925	12.3374	1.26384	chr2	15307032	15701454	-	ENSG00000151779.8	12.1231	12.184	12.705	15.1113	15.58	16.0861
HEG1	0.42685	1.58953e-26	4.8859e-26	None	20.276	15.3862	1.3178	chr3	124684554	124774802	-	ENSG00000173706.8	14.7881	16.0112	15.3593	18.8126	22.1943	19.821
PGM2	-0.541439	1.61272e-26	4.95464e-26	None	8.41163	13.2709	0.633839	chr4	37828255	37864558	+	ENSG00000169299.9	13.3874	12.6854	13.7399	8.51529	8.75761	7.96198
DCAF8	0.425072	1.6424e-26	5.04328e-26	None	29.9169	23.7863	1.25774	chr1	160185505	160254920	-	ENSG00000132716.14	25.4726	21.9457	23.9406	29.0639	30.9476	29.7393
MED15	0.485464	1.64666e-26	5.05378e-26	None	48.9718	36.4852	1.34224	chr22	20850200	20941919	+	ENSG00000099917.13	36.3214	36.7154	36.4186	48.9502	47.4206	50.5447
NR1D2	0.417331	1.74345e-26	5.34811e-26	None	17.9188	14.2773	1.25506	chr3	23986751	24022109	+	ENSG00000174738.8	14.5086	13.9178	14.4055	18.2794	17.9375	17.5396
CDC42EP3	0.344054	1.83924e-26	5.63909e-26	None	38.8226	32.7588	1.18511	chr2	37869032	37965611	-	ENSG00000163171.6	33.6375	31.7714	32.8673	38.4815	39.9499	38.0364
CHMP3	0.375125	1.88722e-26	5.78327e-26	None	38.9265	32.4848	1.1983	chr2	86730554	86948245	-	ENSG00000115561.10	31.9948	34.1172	31.3423	40.0056	37.8795	38.8944
FKBP10	0.565082	1.98942e-26	6.09337e-26	None	23.6171	17.8401	1.32382	chr17	39968932	39979465	+	ENSG00000141756.14	16.6991	18.0143	18.8068	22.0791	23.6998	25.0725
MAL2	0.418251	2.03116e-26	6.21804e-26	None	157.423	128.354	1.22647	chr8	120177273	120257913	+	ENSG00000147676.9	133.726	125.771	125.566	162.749	166.322	143.199
TMX2	-0.444064	2.03406e-26	6.22376e-26	None	44.1648	64.0133	0.689931	chr11	57480072	57508445	+	ENSG00000213593.5	65.8246	64.0463	62.169	43.8794	45.4808	43.1341
NAA10	-0.901476	2.19456e-26	6.71147e-26	None	7.79003	16.3477	0.476522	chrX	153194695	153200676	-	ENSG00000102030.11	19.4121	13.5836	16.0473	7.01295	8.10021	8.25693
POMT1	0.627128	2.266e-26	6.92644e-26	None	11.5696	7.69036	1.50443	chr9	134378289	134399193	+	ENSG00000130714.11	7.50721	7.94025	7.62361	10.843	12.1444	11.7215
IPP	0.648967	2.30587e-26	7.04473e-26	None	12.4117	8.77038	1.41519	chr1	46159996	46216322	-	ENSG00000197429.6	7.73973	10.6271	7.9443	12.4136	12.8481	11.9734
GBA	0.632753	2.34443e-26	7.15893e-26	None	11.0741	7.75496	1.428	chr1	155204243	155214490	-	ENSG00000177628.11	8.10765	7.54319	7.61403	11.1775	11.7977	10.247
PIGK	-0.537239	2.36195e-26	7.20877e-26	None	9.89916	15.6248	0.633554	chr1	77554675	77685115	-	ENSG00000142892.10	16.7017	14.8696	15.3031	10.3248	10.3834	8.98935
NUDCD1	-0.566643	2.4346e-26	7.42675e-26	None	9.05798	14.9971	0.603982	chr8	110253148	110346614	-	ENSG00000120526.6	15.2592	15.8237	13.9084	9.19118	9.64087	8.34188
ABCC5	0.439759	2.44886e-26	7.46648e-26	None	24.042	19.5328	1.23085	chr3	183637722	183735803	-	ENSG00000114770.12	19.6162	19.2879	19.6945	24.3151	22.9576	24.8533
MAP3K4	0.422179	2.48837e-26	7.58312e-26	None	17.3829	13.1945	1.31743	chr6	161412759	161538417	+	ENSG00000085511.15	13.1745	12.867	13.5421	17.0688	17.0033	18.0765
PITRM1	-0.443957	2.57735e-26	7.85032e-26	None	13.0909	19.0576	0.686913	chr10	3179920	3215003	-	ENSG00000107959.11	19.7046	18.8752	18.593	13.1424	13.5218	12.6086
PELP1	-0.506766	2.58404e-26	7.86673e-26	None	16.9011	25.8612	0.653532	chr17	4574679	4607632	-	ENSG00000141456.10	23.9535	25.9721	27.6578	16.3823	16.7266	17.5943
EP300	0.459136	2.83879e-26	8.63794e-26	None	13.5231	10.6357	1.27148	chr22	41487790	41576081	+	ENSG00000100393.9	10.6633	10.2867	10.9571	13.2456	13.4042	13.9196
TNKS2	0.384352	3.21784e-26	9.78637e-26	None	19.7758	16.3738	1.20777	chr10	93558069	93625033	+	ENSG00000107854.5	16.8687	16.1585	16.0942	19.6587	20.2836	19.385
TPD52	-0.419735	3.23072e-26	9.82061e-26	None	22.975	31.6664	0.725534	chr8	80870571	81143467	-	ENSG00000076554.11	32.047	32.8297	30.1225	24.0605	22.4786	22.3859
BAZ2A	0.337004	3.47822e-26	1.05676e-25	None	62.1128	49.1185	1.26455	chr12	56989380	57030600	-	ENSG00000076108.7	46.2574	49.7893	51.3087	62.6313	62.0501	61.6569
EEF2	0.301747	3.99708e-26	1.21379e-25	None	741.84	652.928	1.13617	chr19	3976054	3985467	-	ENSG00000167658.11	576.746	689.447	692.592	680.827	791.784	752.909
SIRT5	0.473554	4.20962e-26	1.27769e-25	None	16.503	13.2902	1.24174	chr6	13574816	13614790	+	ENSG00000124523.10	12.2939	13.7837	13.793	15.2939	15.8493	18.366
CGN	0.44434	4.29698e-26	1.30355e-25	None	12.8486	10.1373	1.26746	chr1	151482986	151511168	+	ENSG00000143375.10	9.74263	10.2326	10.4367	13.0224	13.2487	12.2747
ZSWIM7	0.821442	4.5878e-26	1.39108e-25	None	12.2499	8.12069	1.50848	chr17	15879874	15903031	-	ENSG00000214941.3	7.83515	7.95944	8.56747	11.7889	12.7824	12.1785
NEDD1	-0.559263	4.90338e-26	1.48602e-25	None	13.0164	20.6955	0.628947	chr12	97301001	97347129	+	ENSG00000139350.7	22.9437	19.1537	19.9892	12.8861	13.8802	12.2828
ZBTB7B	0.53722	5.13059e-26	1.5541e-25	None	25.9952	19.109	1.36037	chr1	154975127	154990998	+	ENSG00000160685.9	18.3692	20.0813	18.8764	25.6619	25.27	27.0539
NRIP1	0.399839	5.14077e-26	1.5564e-25	None	16.3903	13.3643	1.22643	chr21	16333556	16437321	-	ENSG00000180530.5	13.4896	13.0119	13.5913	16.5859	16.2383	16.3468
PSMD13	-0.446983	5.19645e-26	1.57247e-25	None	30.3928	45.8161	0.663364	chr11	236546	252983	+	ENSG00000185627.13	43.061	48.3595	46.0279	30.0185	29.9129	31.2469
PSMC6	-0.460177	5.30775e-26	1.60535e-25	None	26.6571	37.2033	0.716525	chr14	53173890	53195305	+	ENSG00000100519.7	40.7907	36.4583	34.3608	27.7502	26.8104	25.4105
ESCO2	-0.533277	5.59777e-26	1.69202e-25	None	6.40761	10.0037	0.640526	chr8	27629466	27670157	+	ENSG00000171320.10	10.1844	10.0223	9.80428	6.2809	6.6676	6.27431
[truncated: 4,042 more rows]
